# Supplementary material for: Causal relationship between gut microbiota and gastrointestinal diseases: a mendelian randomization study
Source: PubMed Central journal article supplement (PMC10804519; doi:10.1186/s12967-024-04894-5), 2024-01-23

**Figure 1** Leave-one-out analysis, funnel plot, MR effect size and scatter plot for gut microbiota abundance (genus *Alistipes* id.968) on gastroesophageal reflux disease

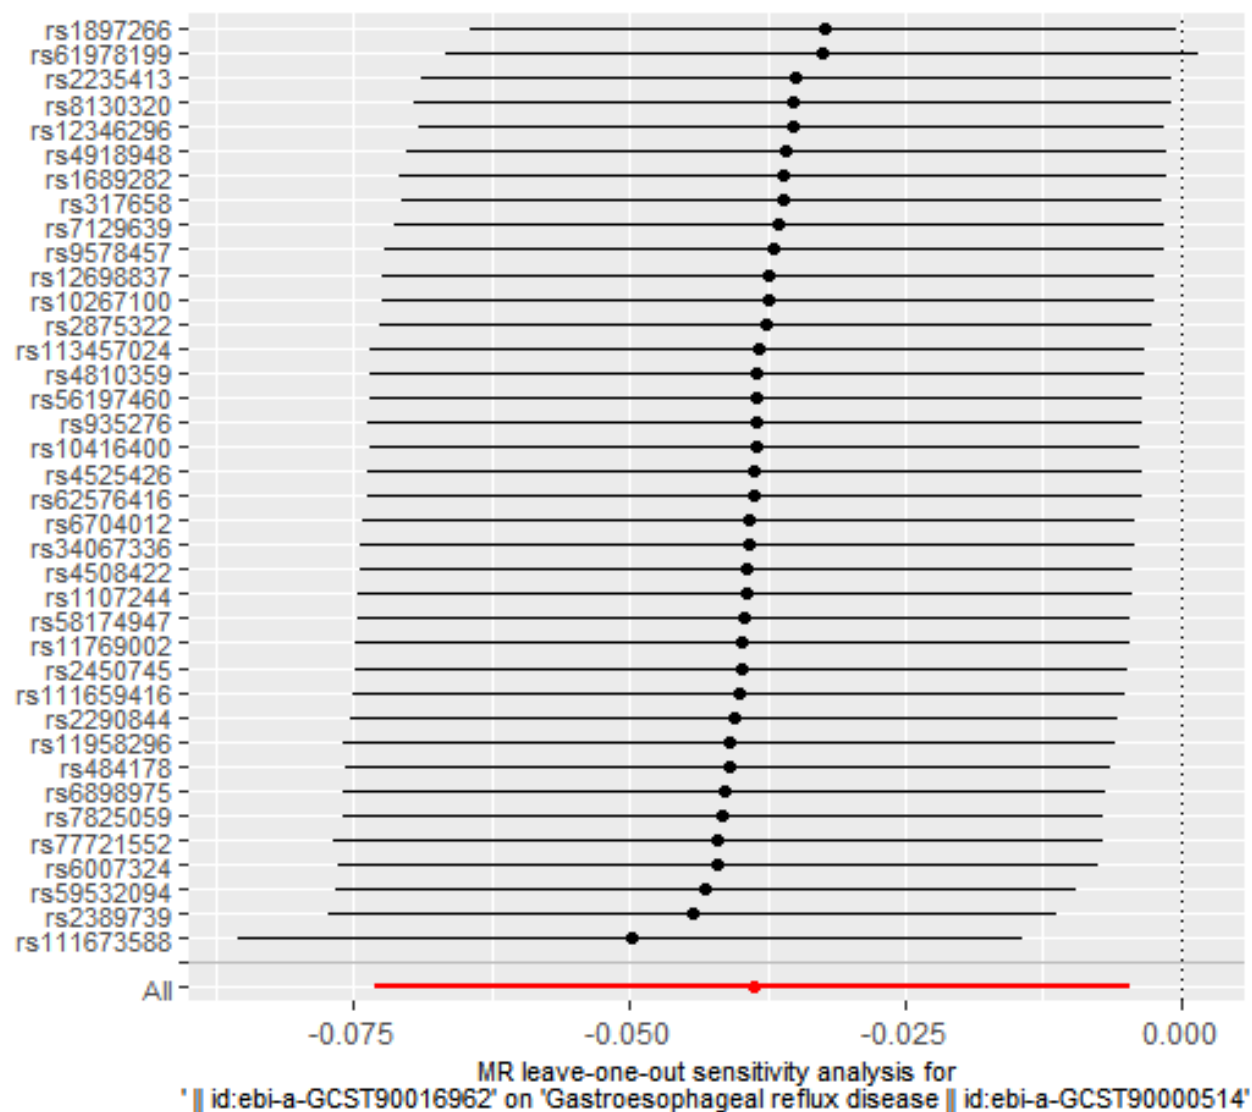

MR Method

- Inverse variance weighted
- MR Egger

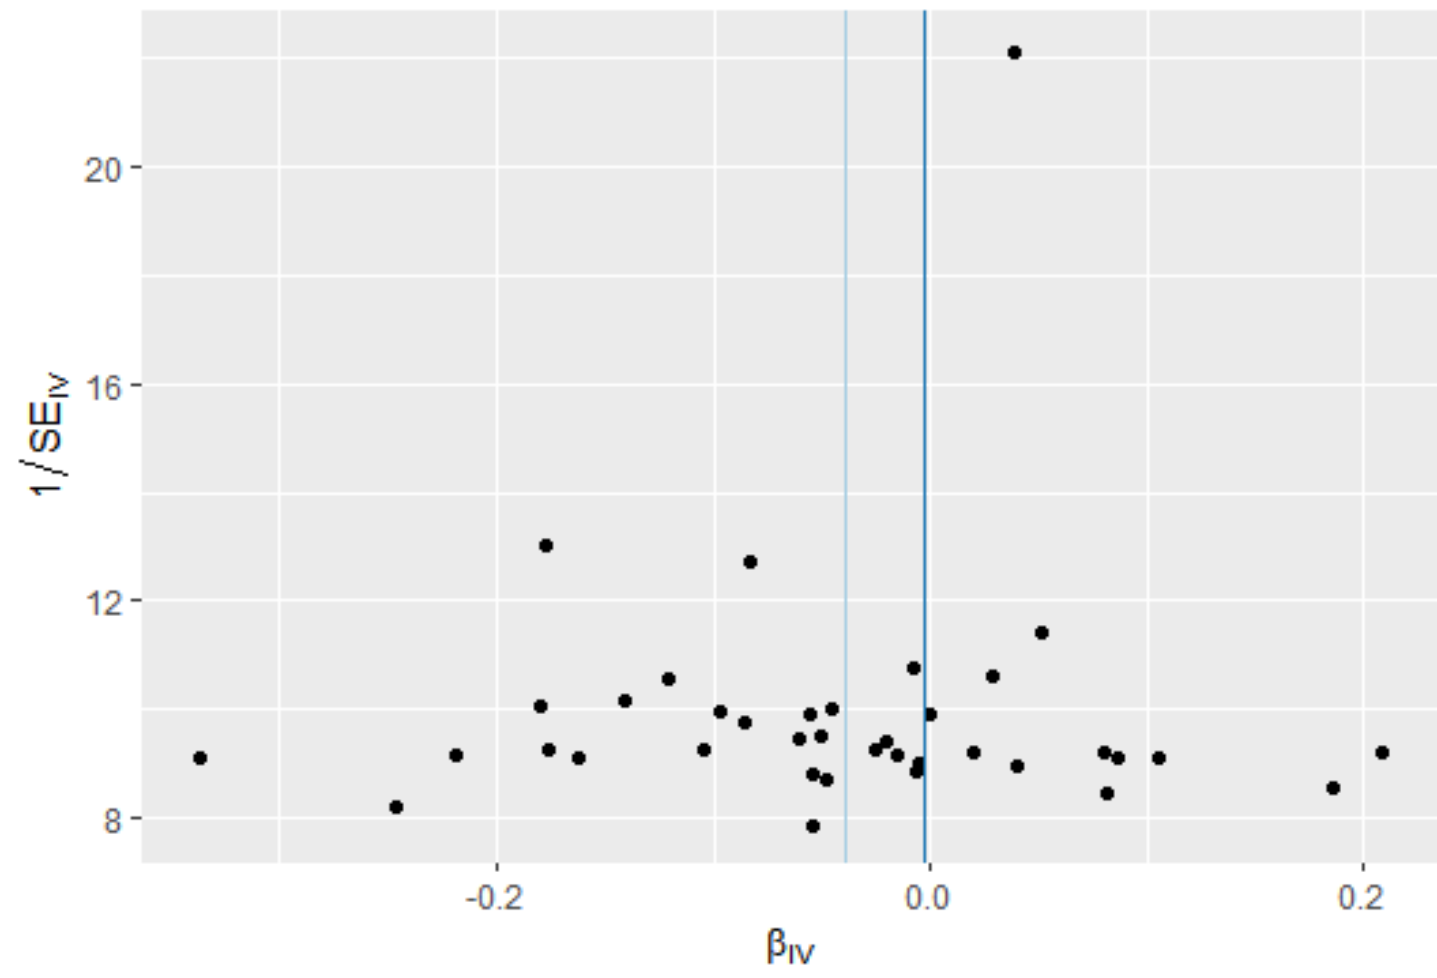

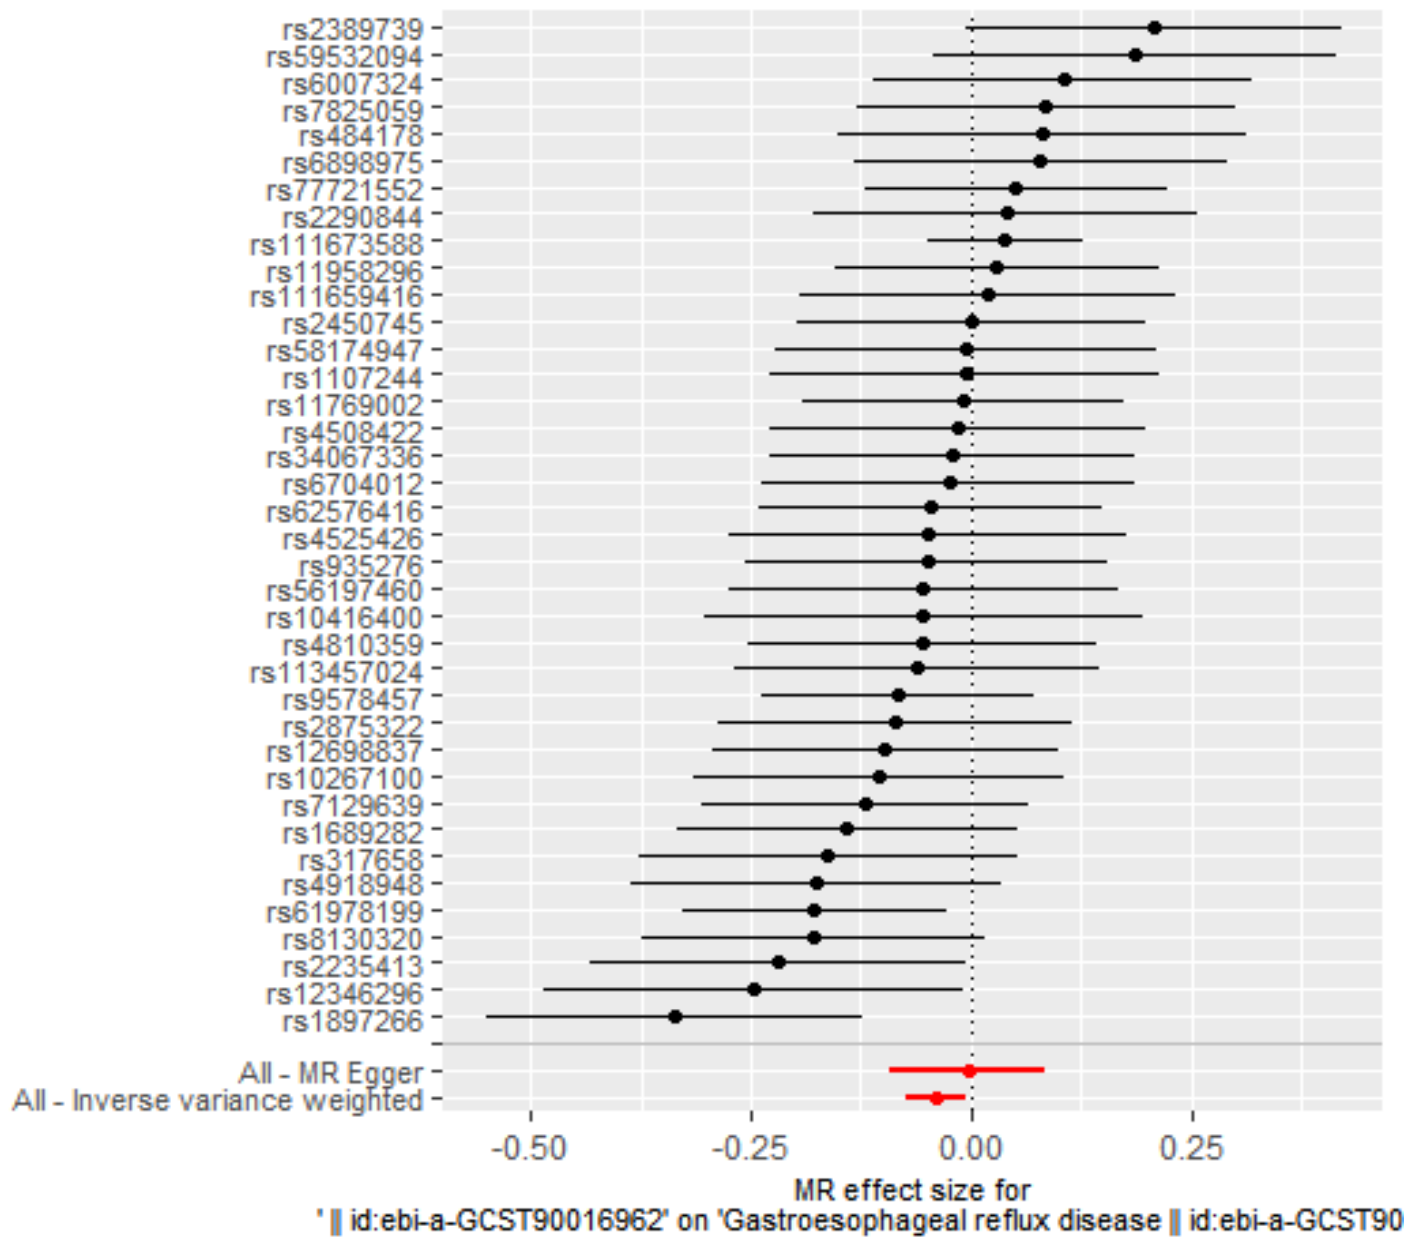

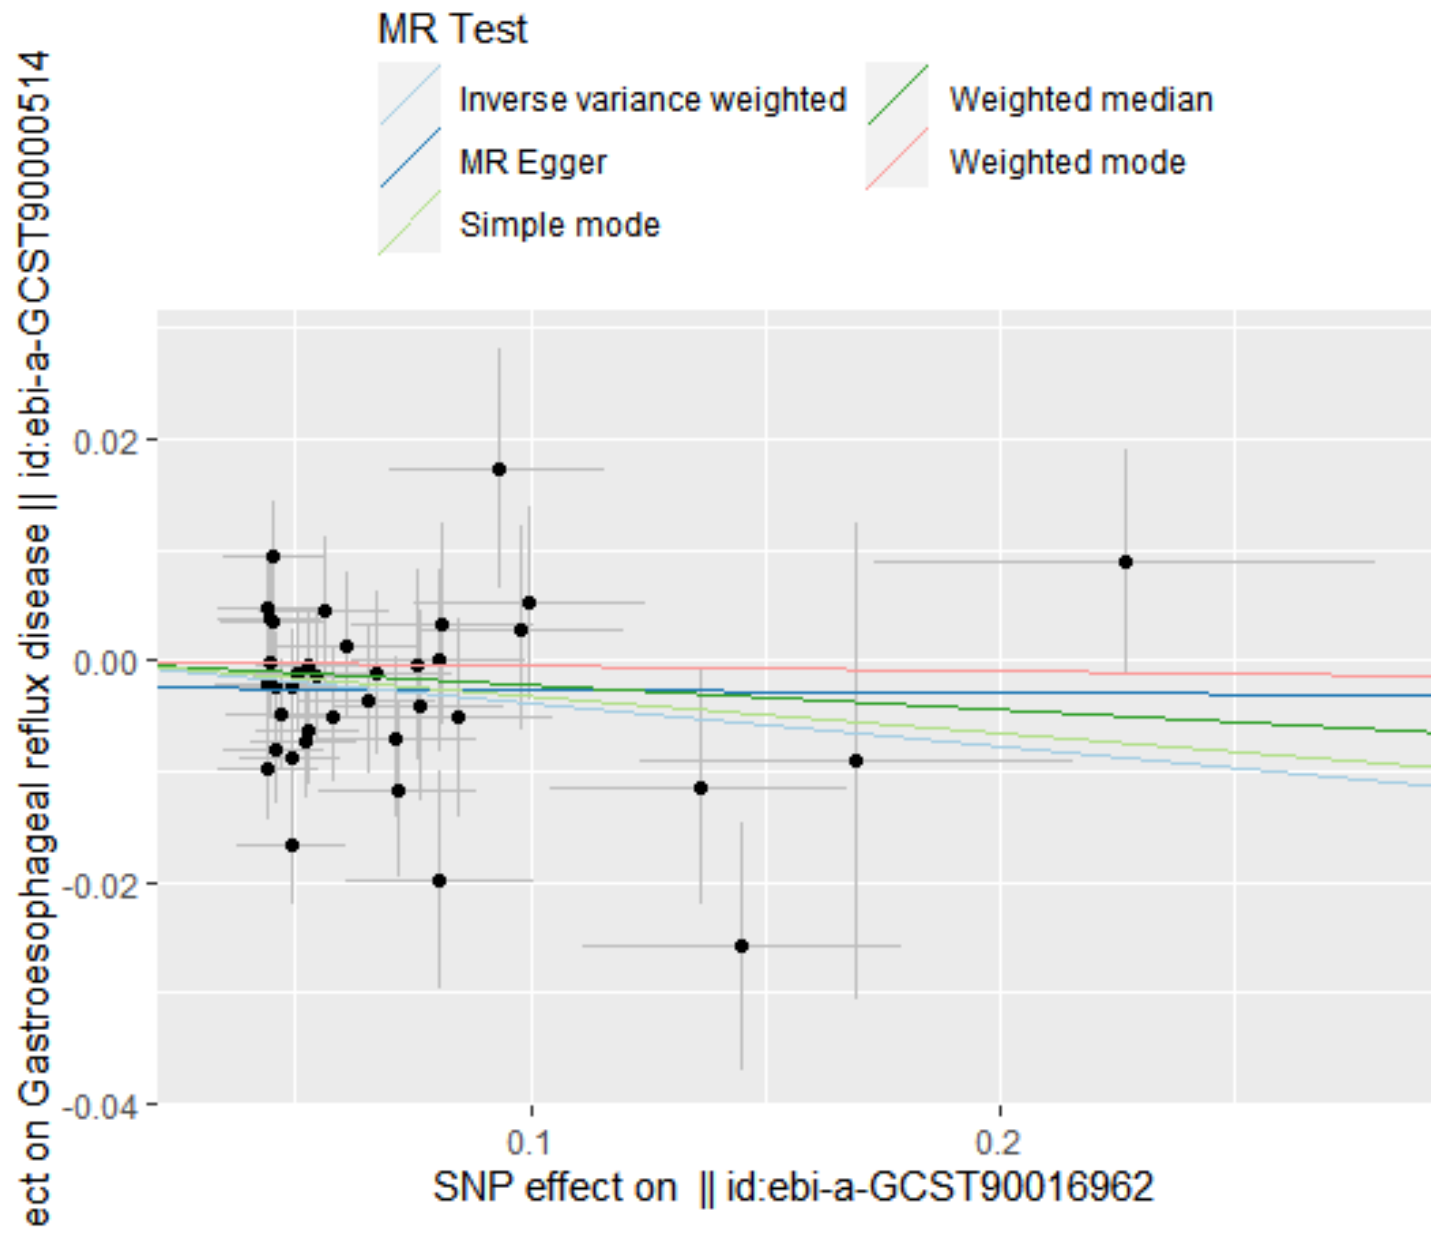

**Figure 2** Leave-one-out analysis, funnel plot, MR effect size and scatter plot for gut microbiota abundance (genus Christensenellaceae R 7group id.11283) on gastroesophageal reflux disease

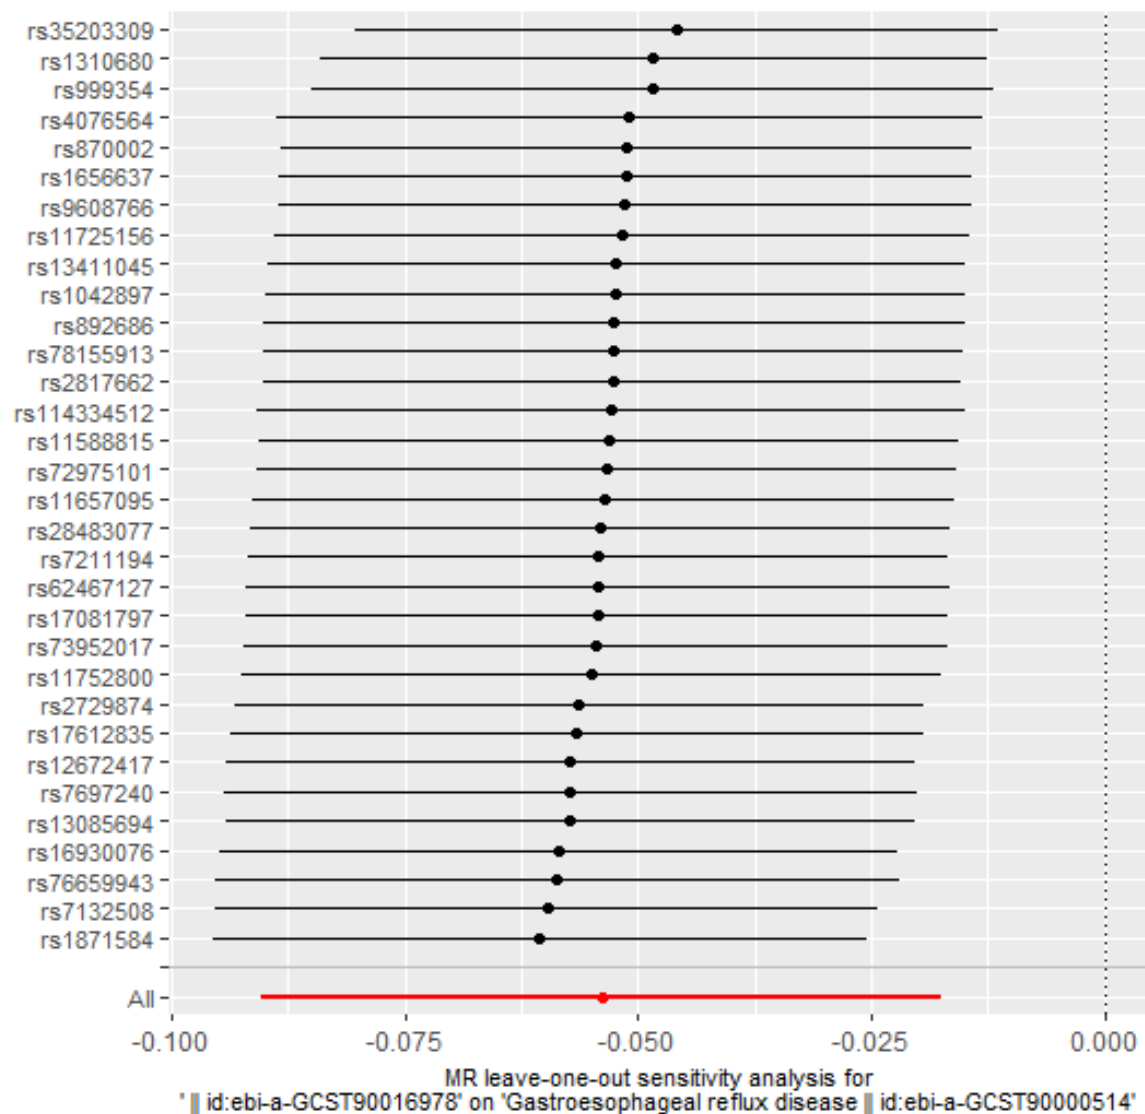

MR Method

- Inverse variance weighted
- MR Egger

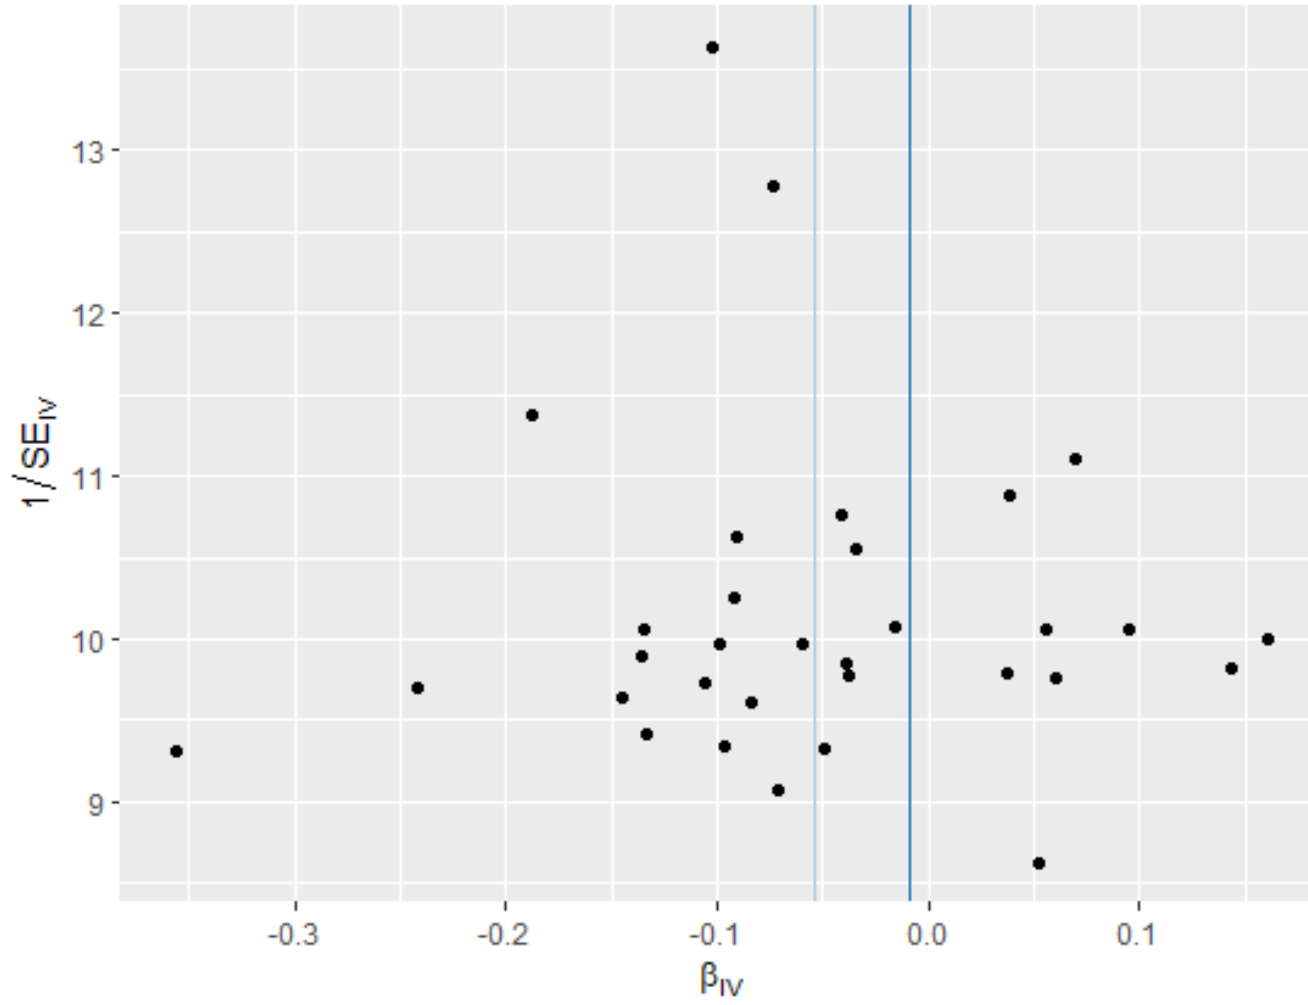

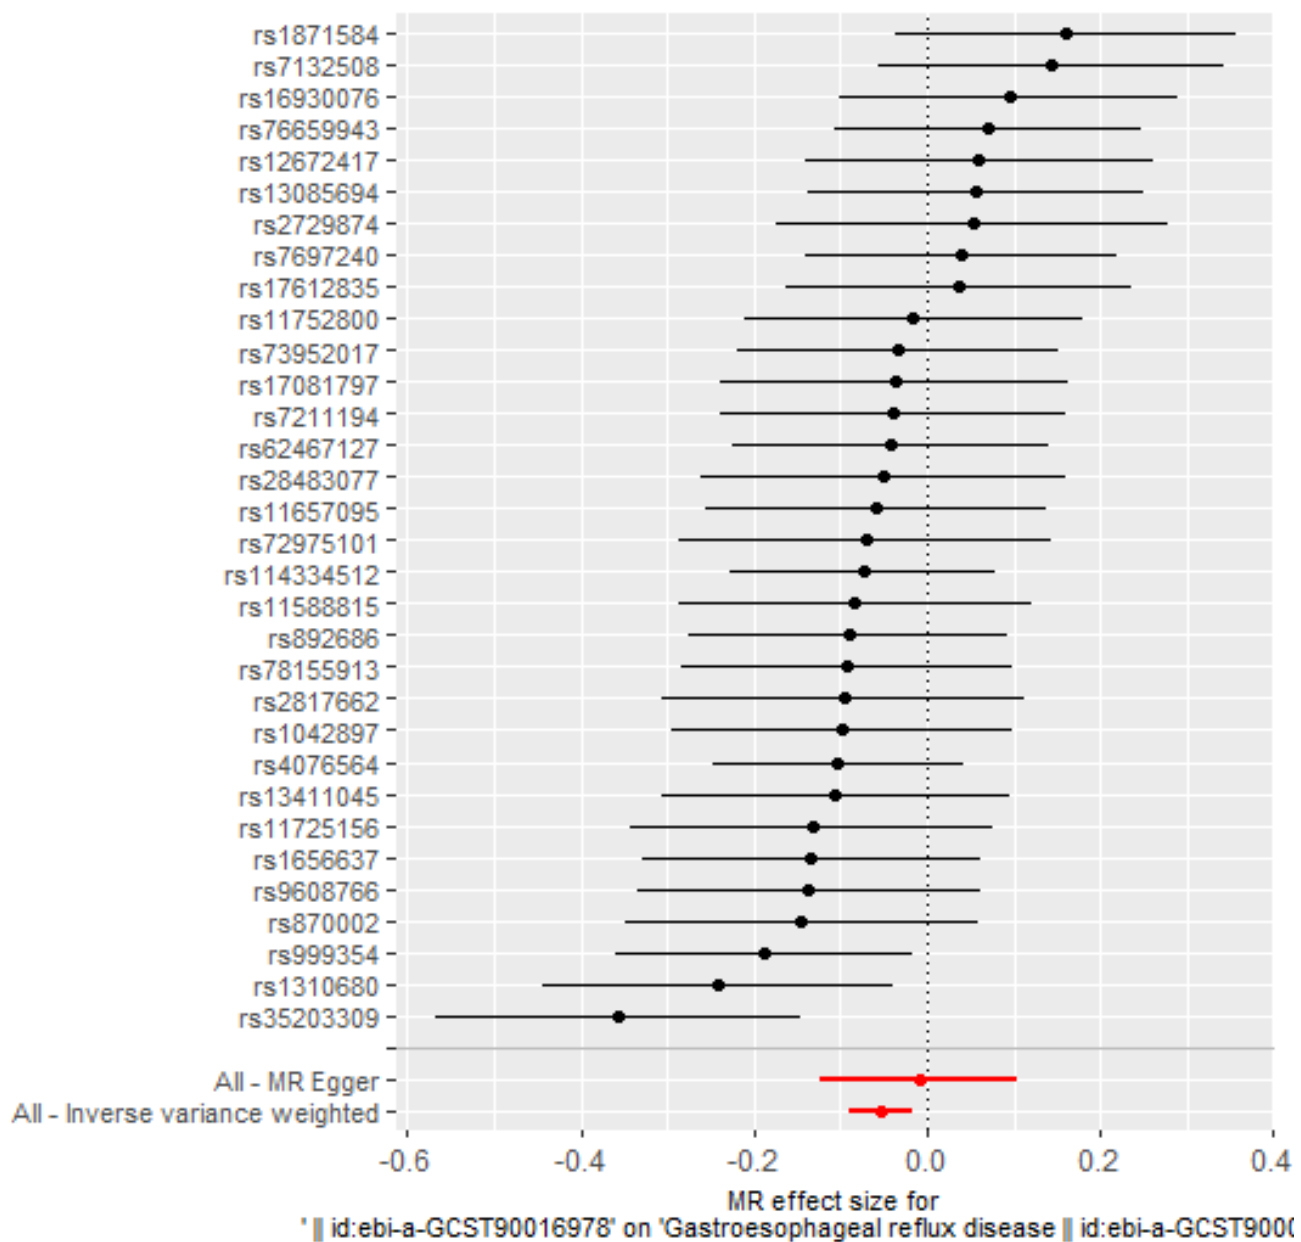

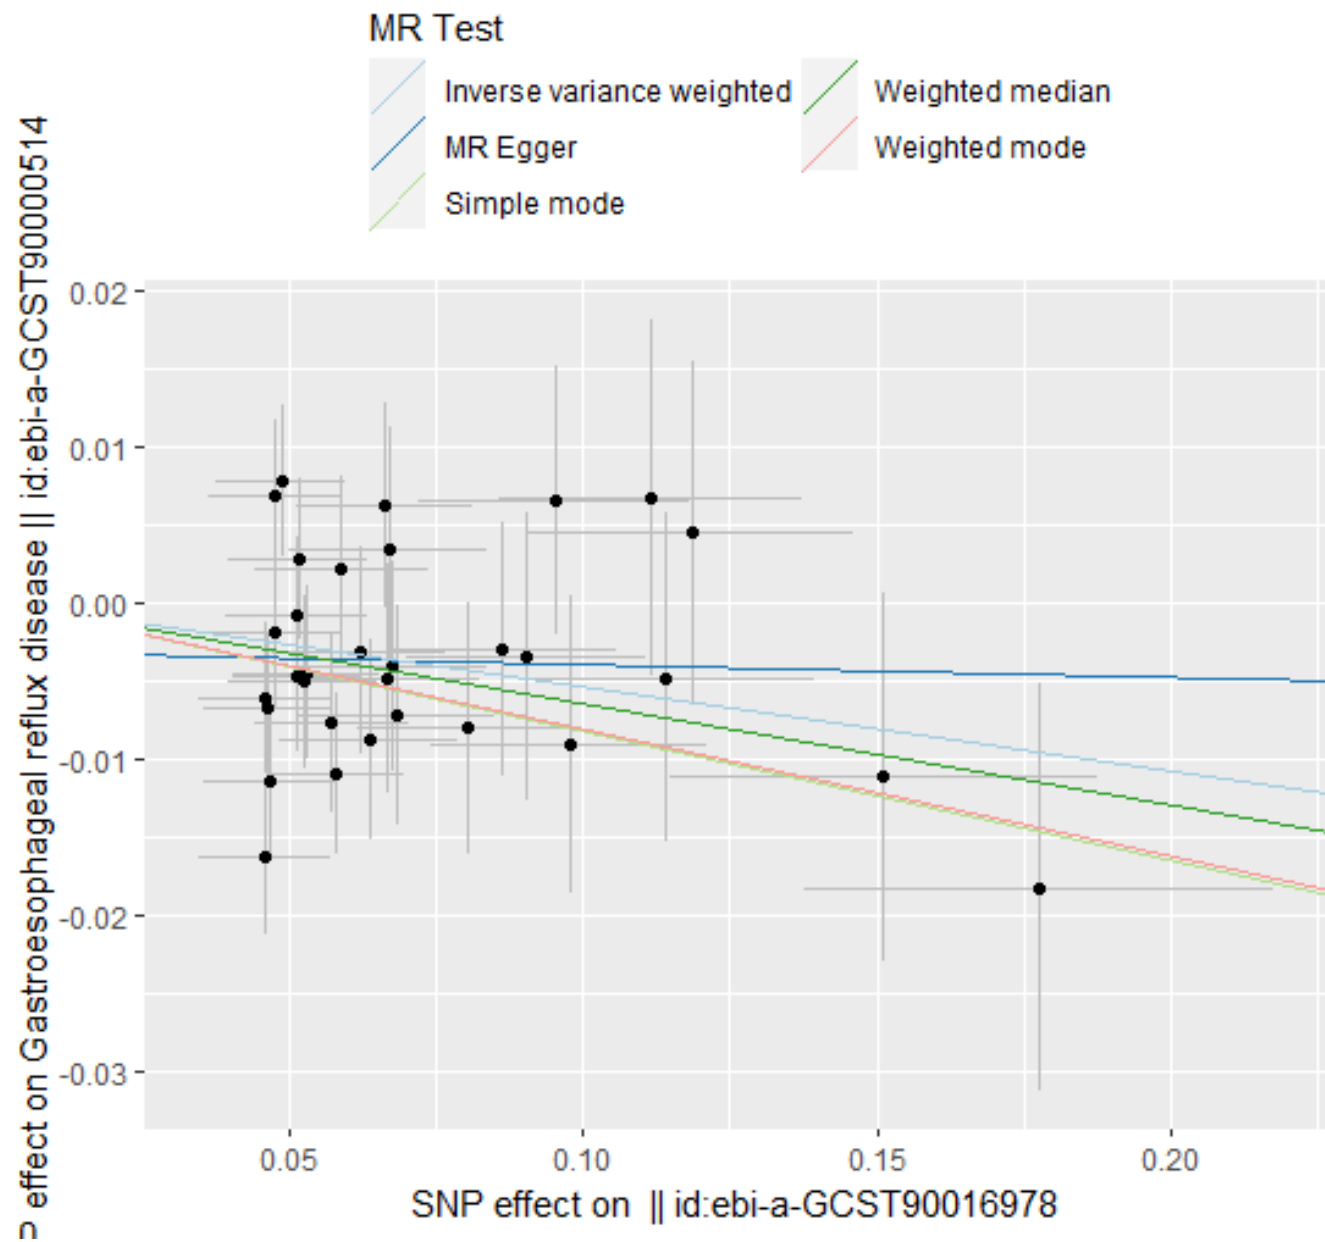



**Figure 3** Leave-one-out analysis, funnel plot, MR effect size and scatter plot for gut microbiota abundance (genus Coprococcus2 id.11302) on gastroesophageal reflux disease

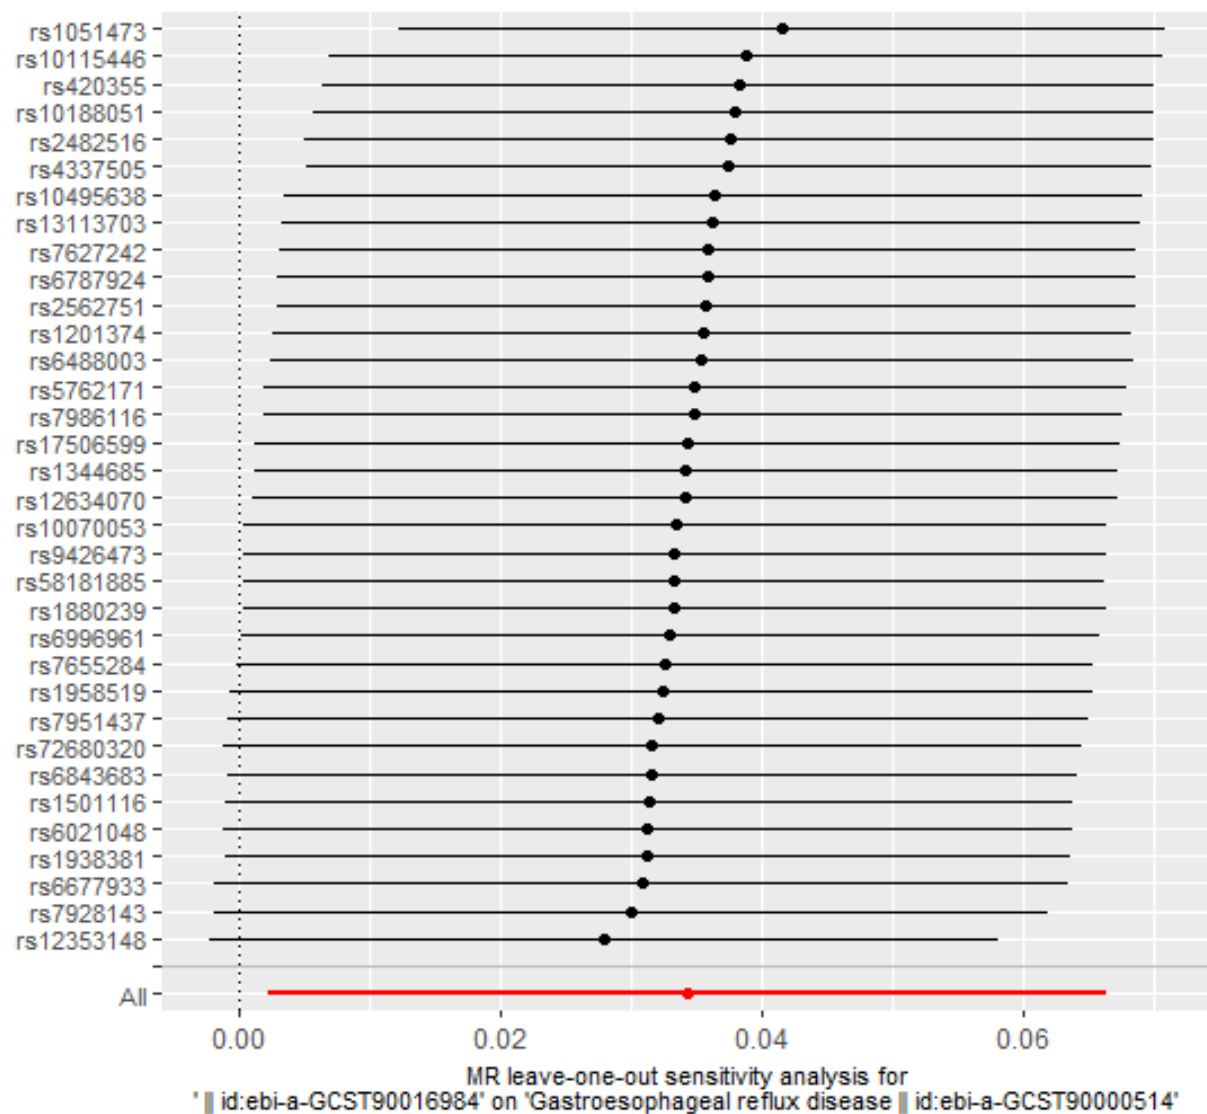

MR Method

- Inverse variance weighted
- MR Egger

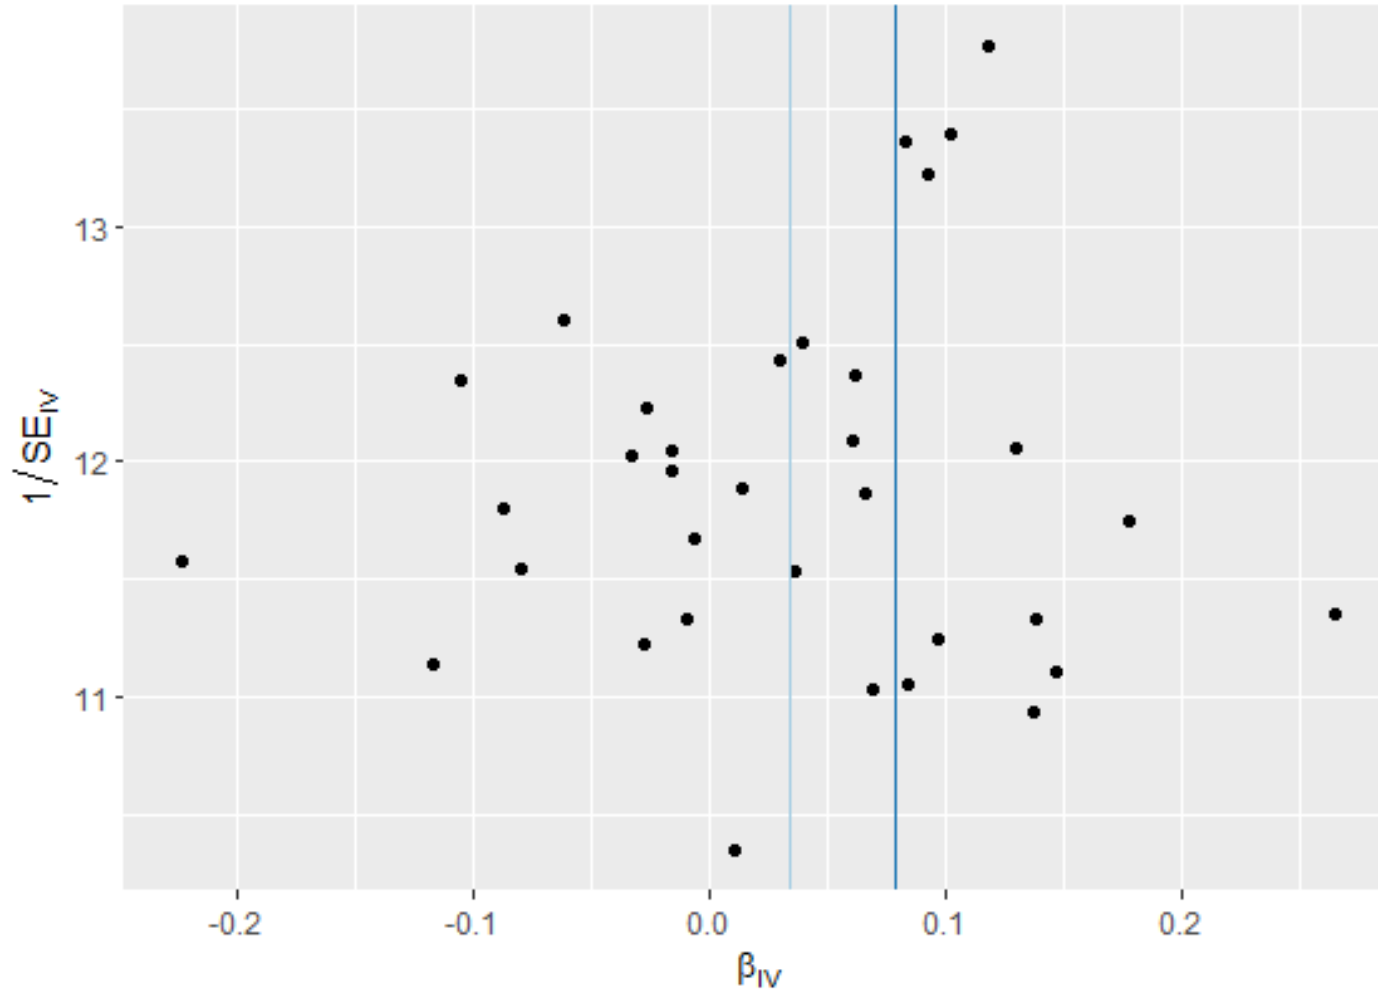

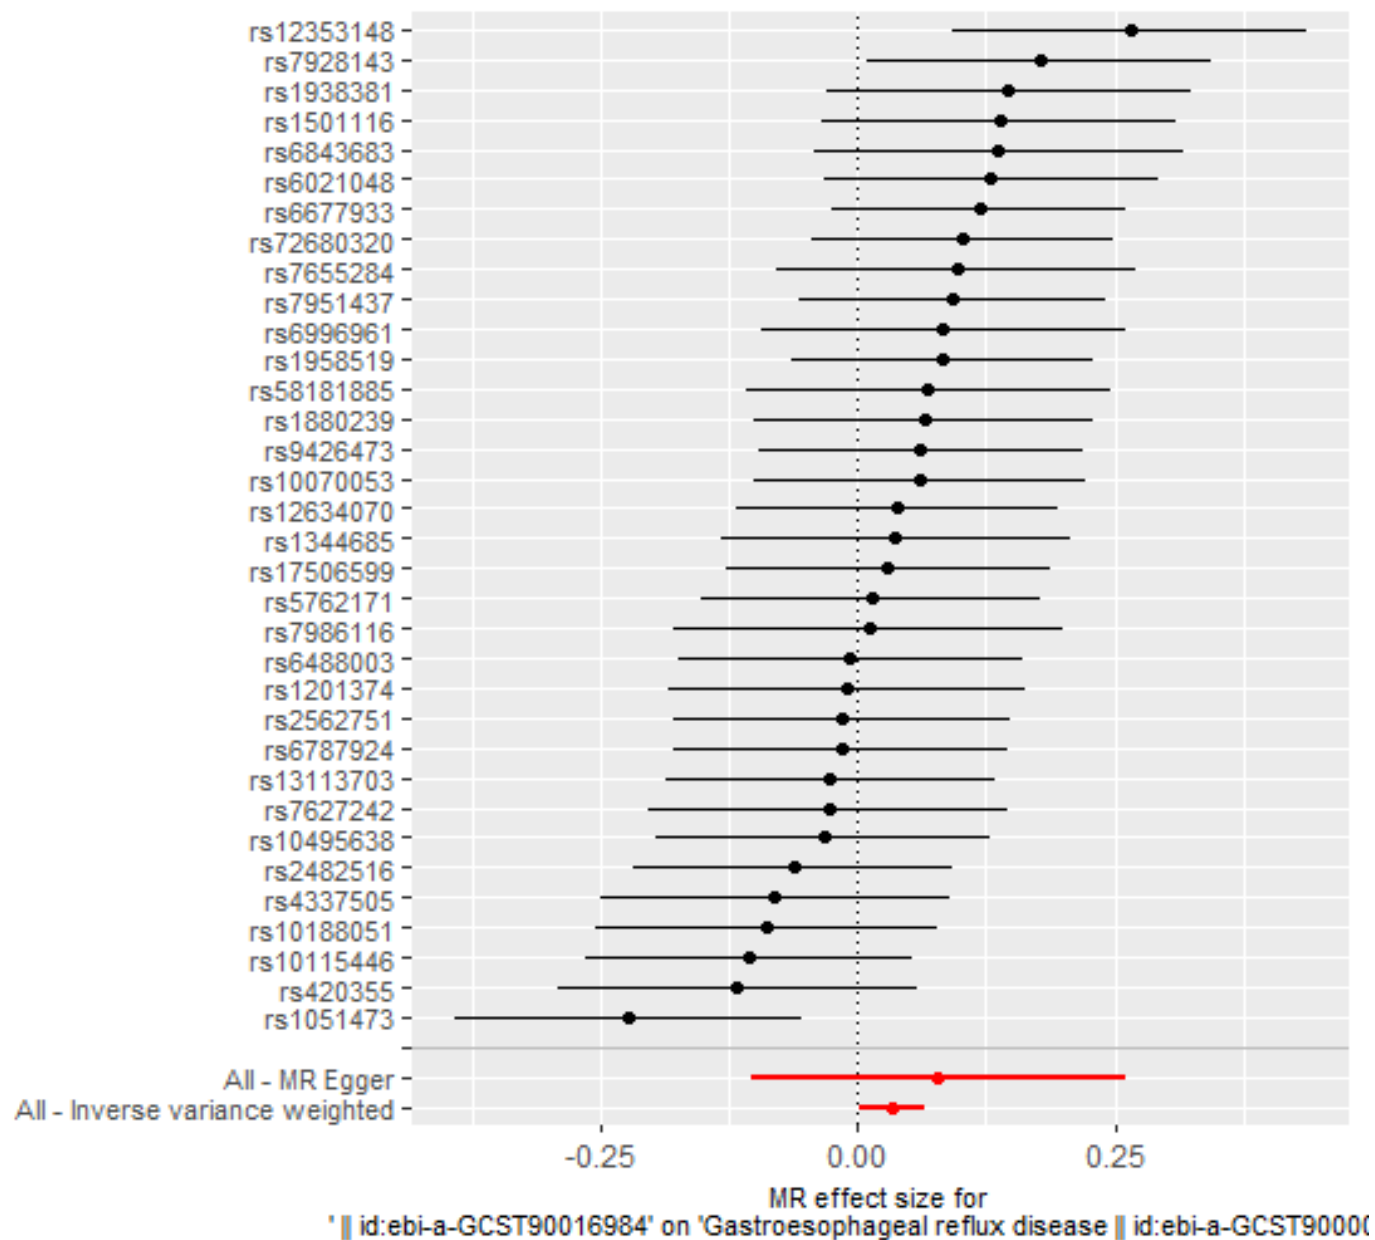

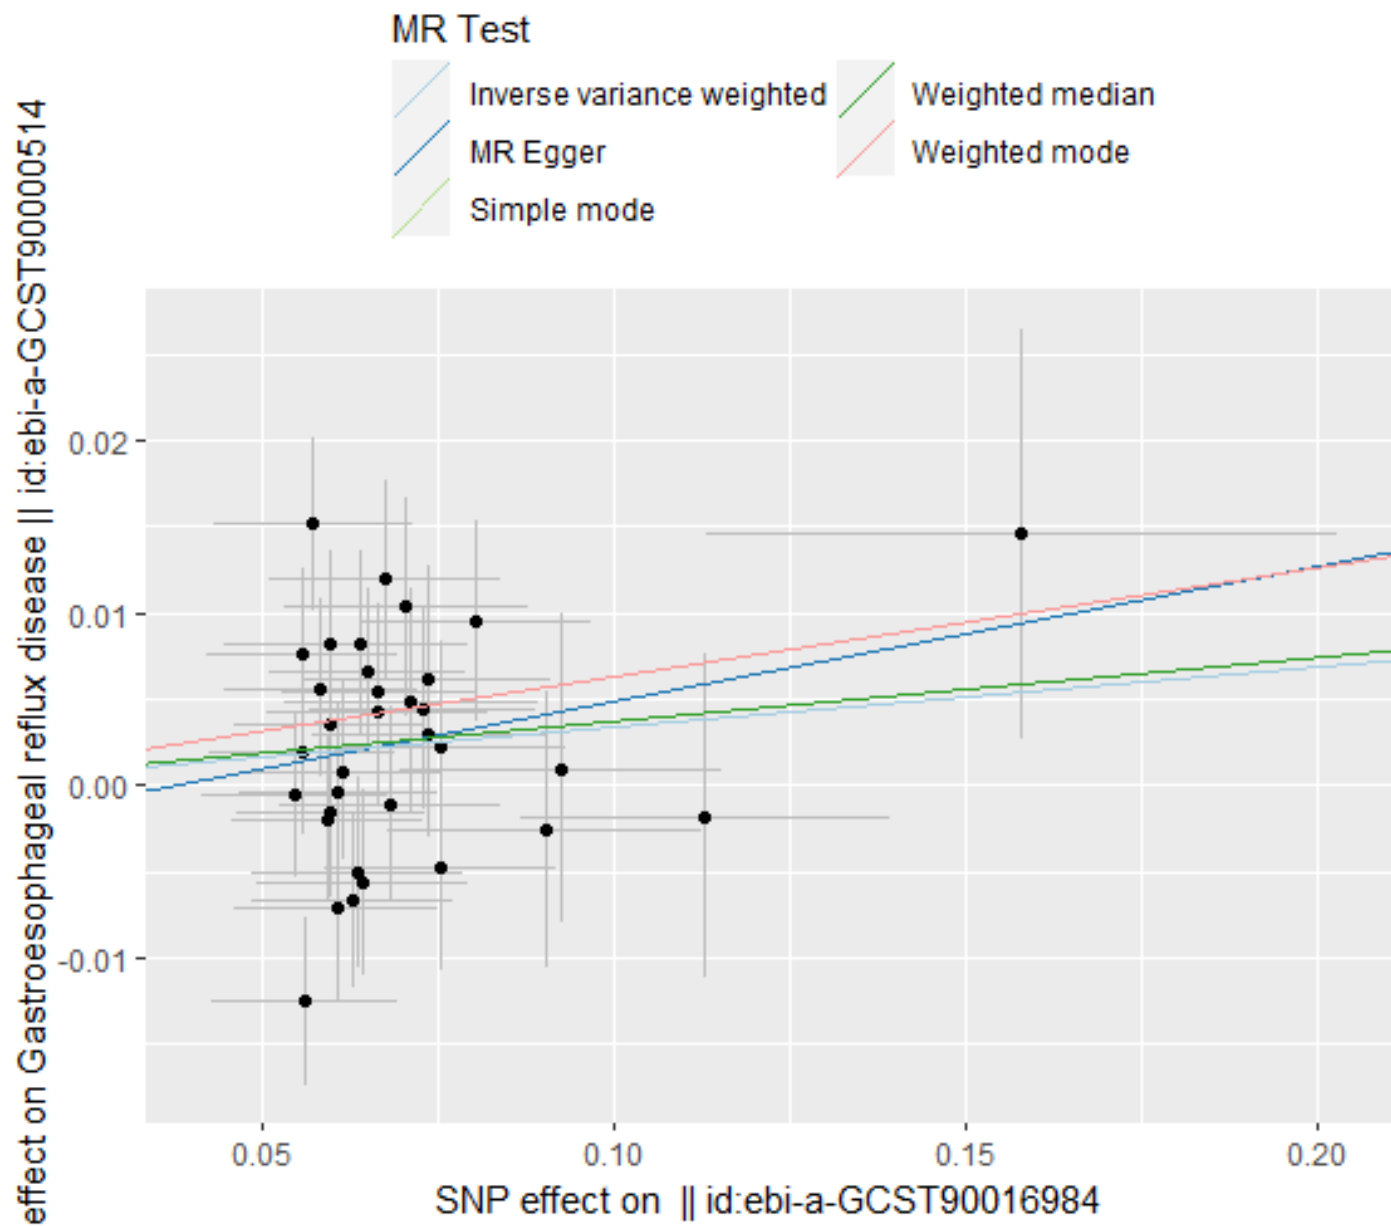

**Figure 4** Leave-one-out analysis, funnel plot, MR effect size and scatter plot for gut microbiota abundance (genus Faecalibacterium id.2057) on gastroesophageal reflux disease

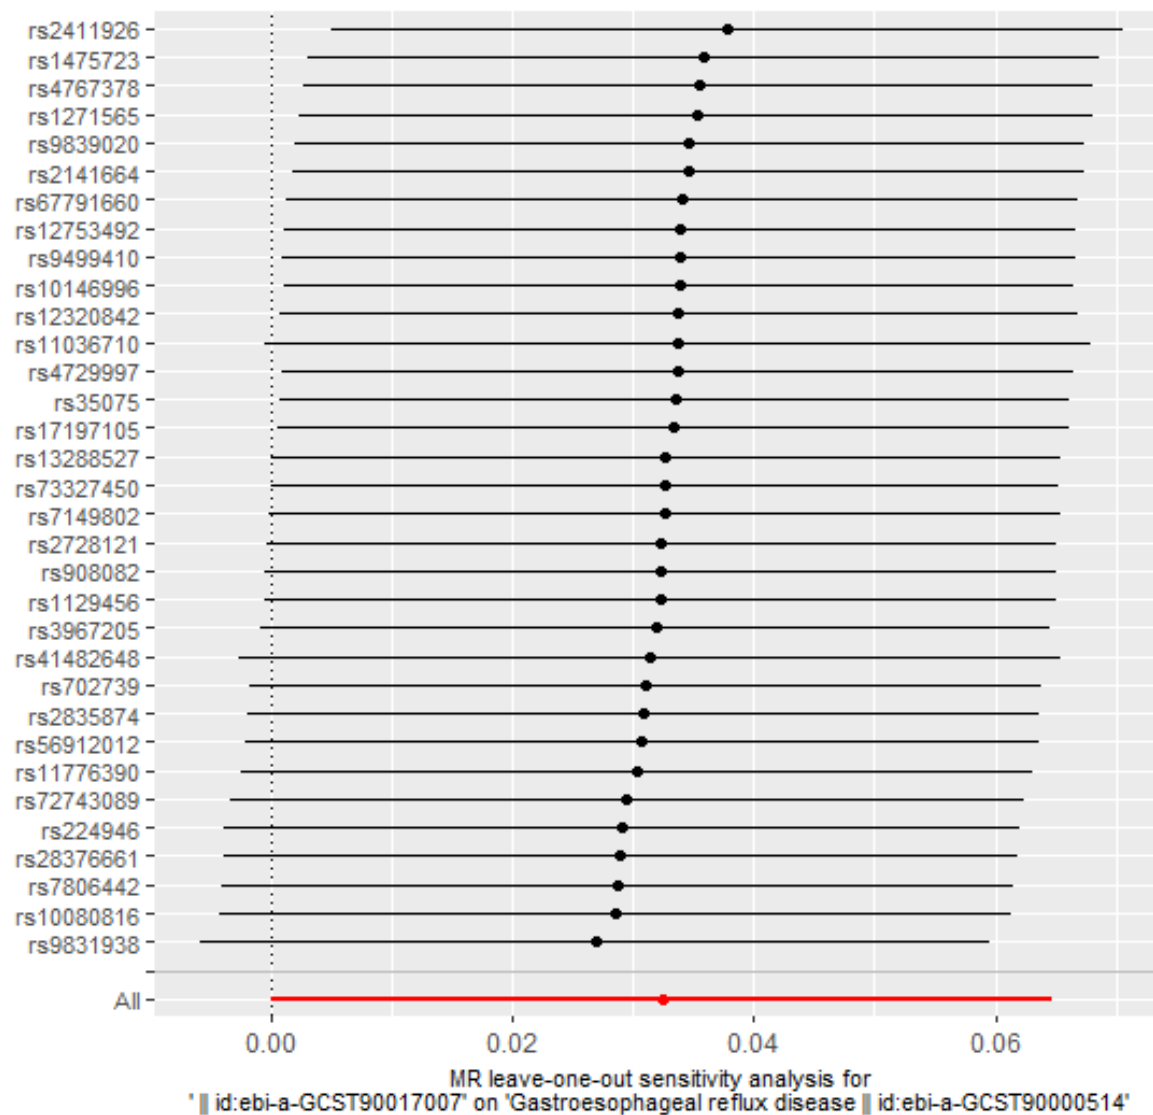

MR Method

- Inverse variance weighted
- MR Egger

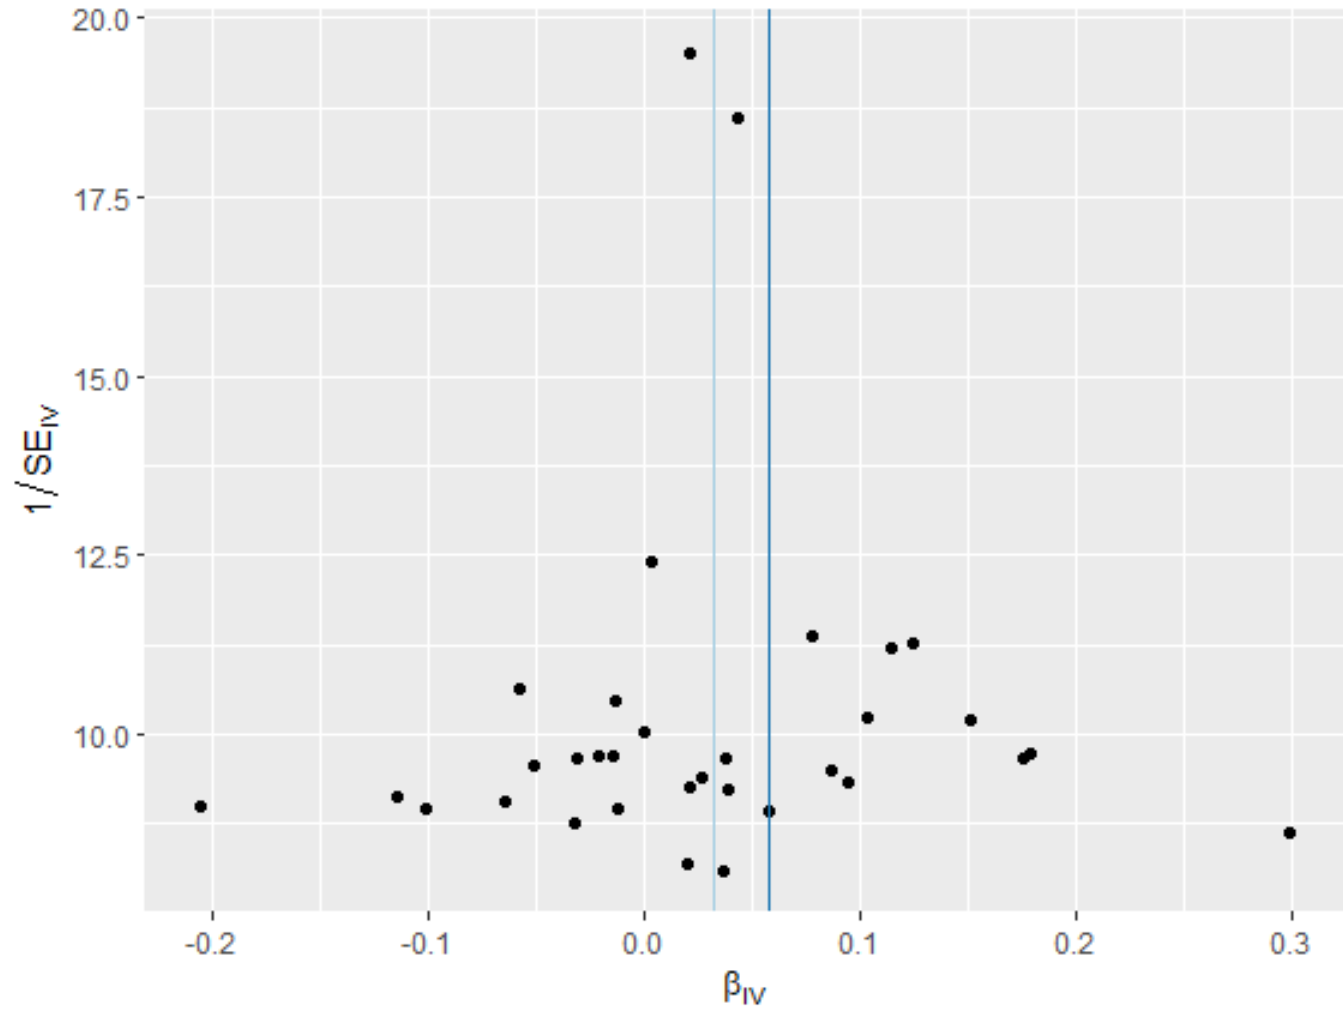

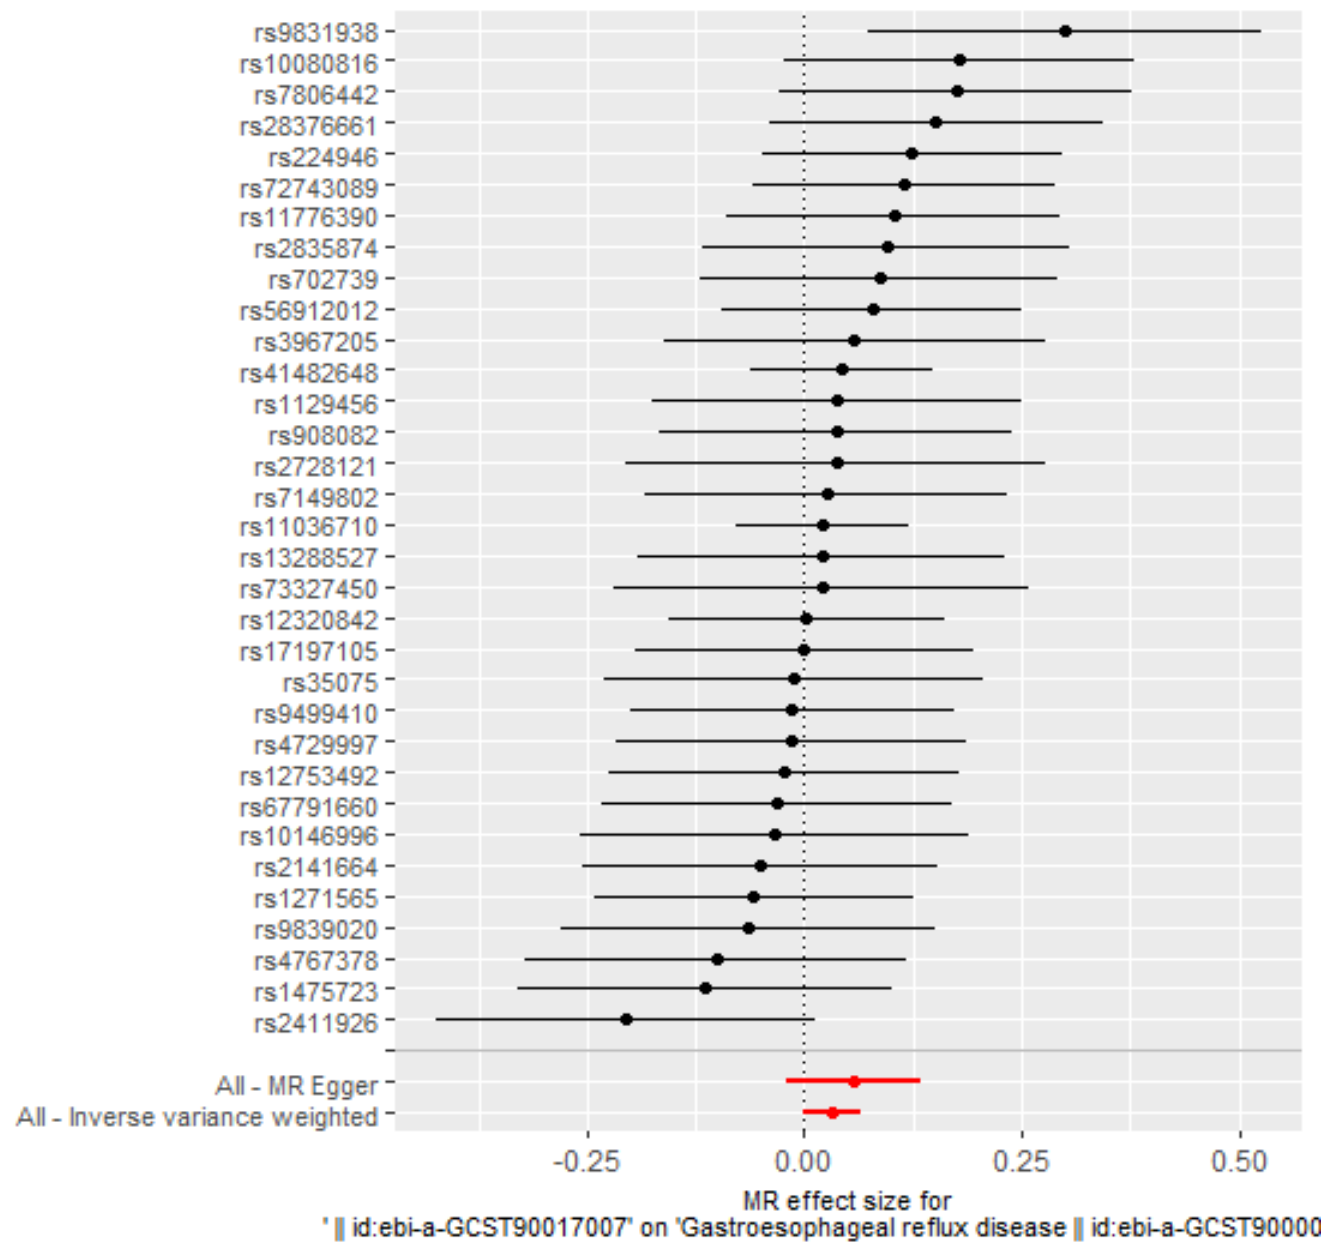

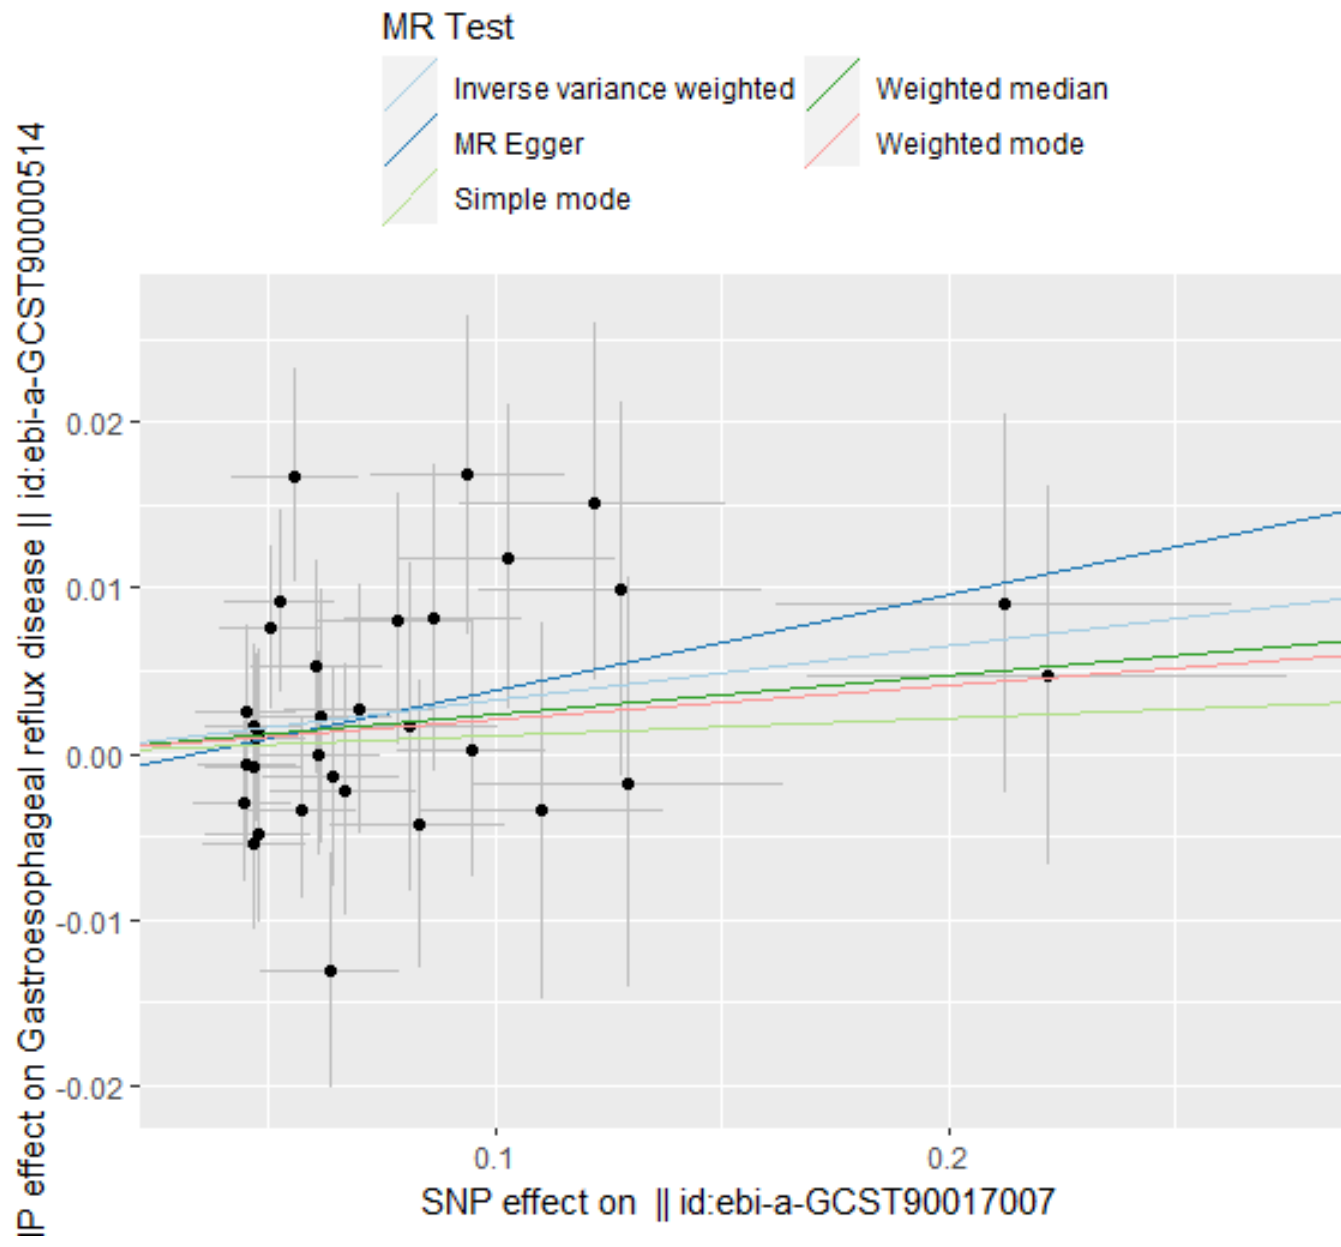



**Figure 5** Leave-one-out analysis, funnel plot, MR effect size and scatter plot for gut microbiota abundance (genus *Oscillospira* id.2064) on gastroesophageal reflux disease

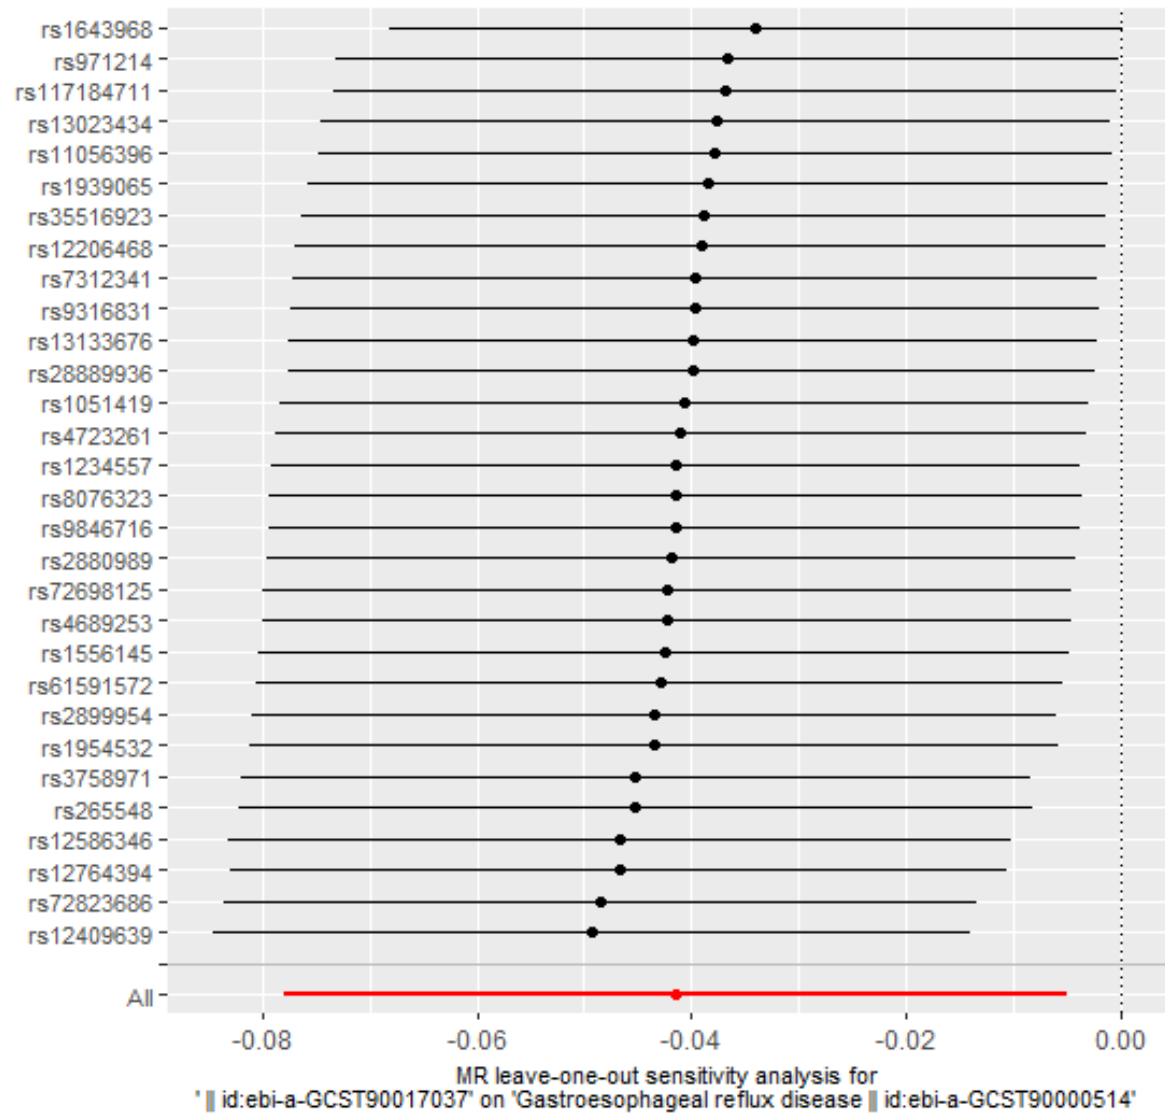

MR Method

- Inverse variance weighted
- MR Egger

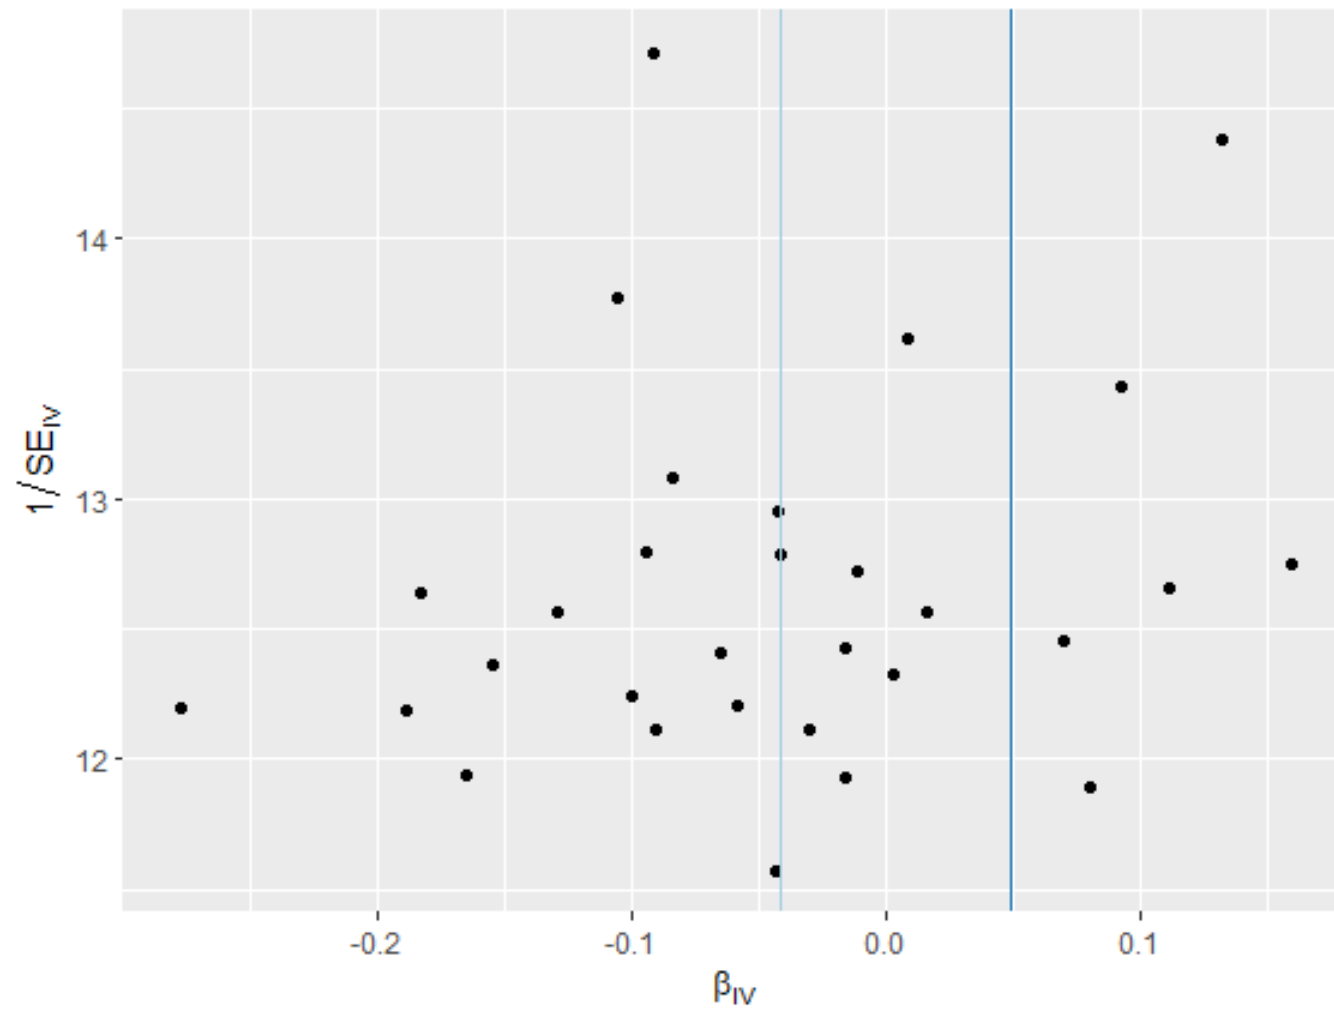

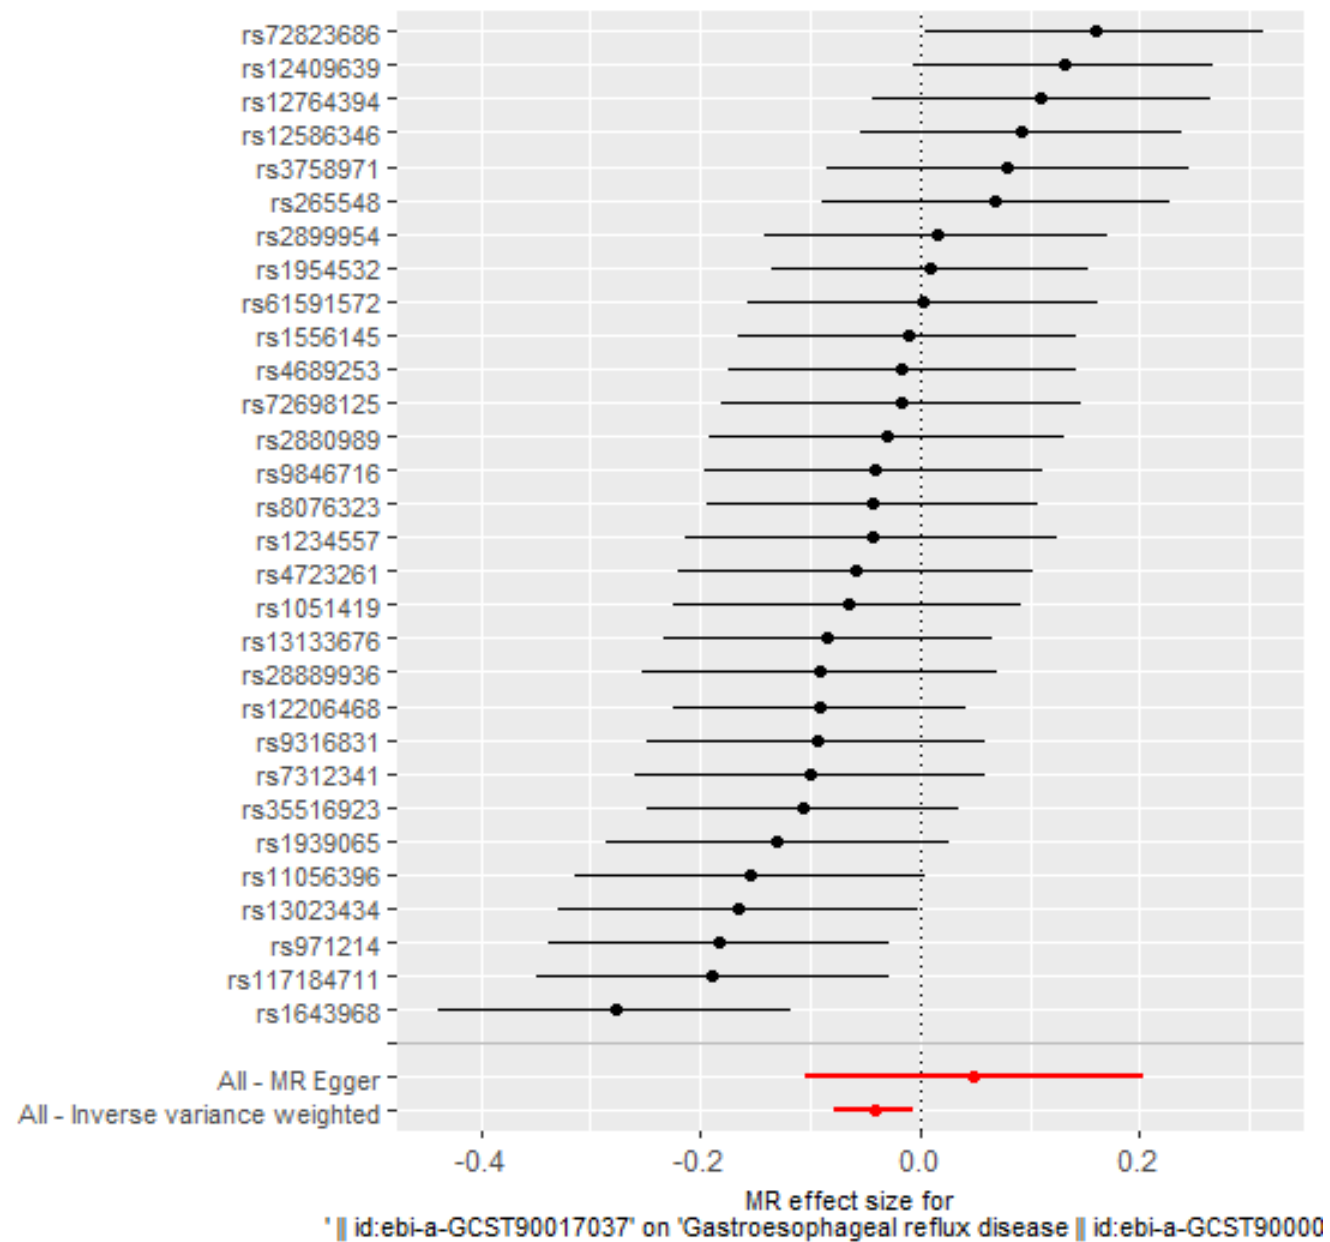

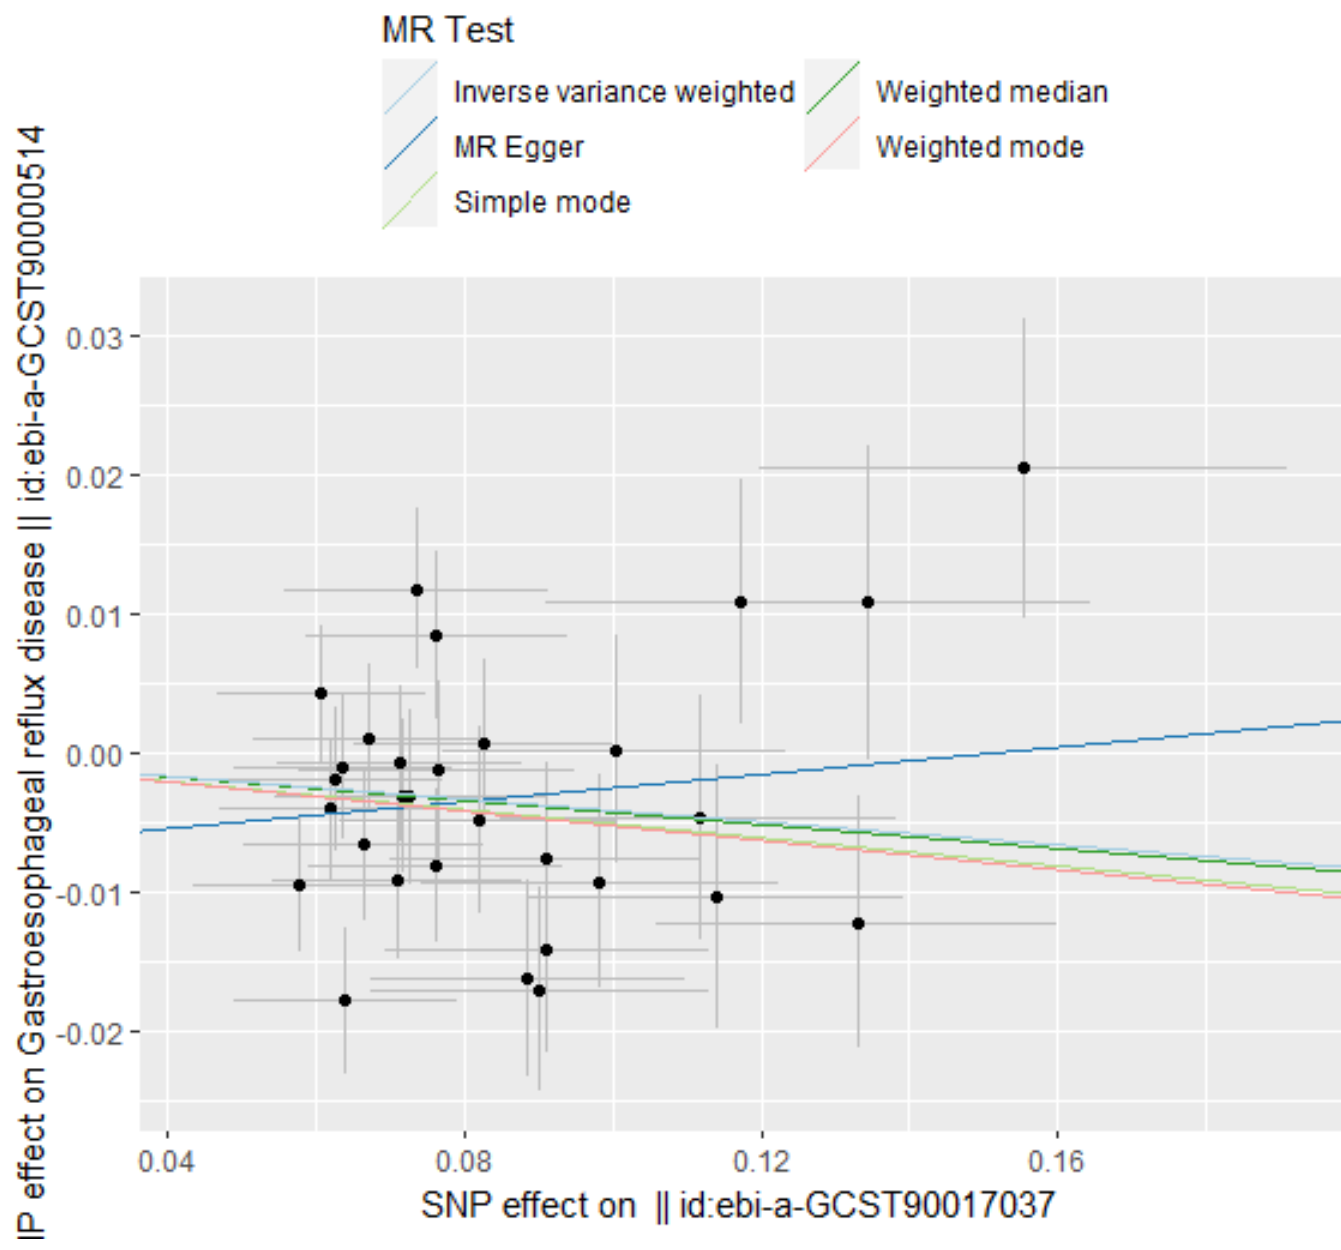

**Figure 6** Leave-one-out analysis, funnel plot, MR effect size and scatter plot for gut microbiota abundance (genus Rikenellaceae RC9 gut group id.11191) on gastroesophageal reflux disease

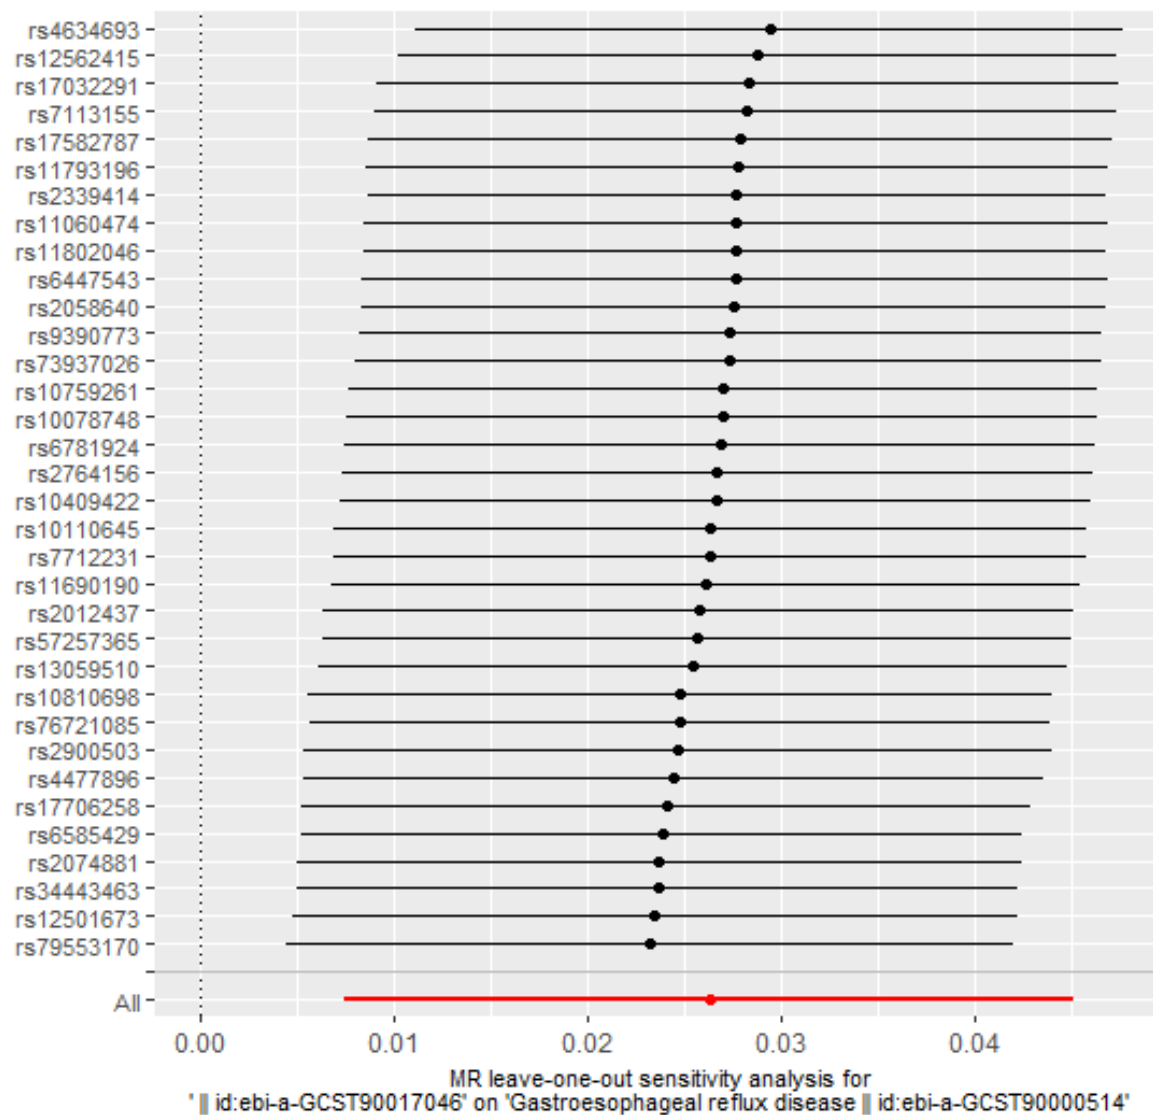

MR Method

- Inverse variance weighted
- MR Egger

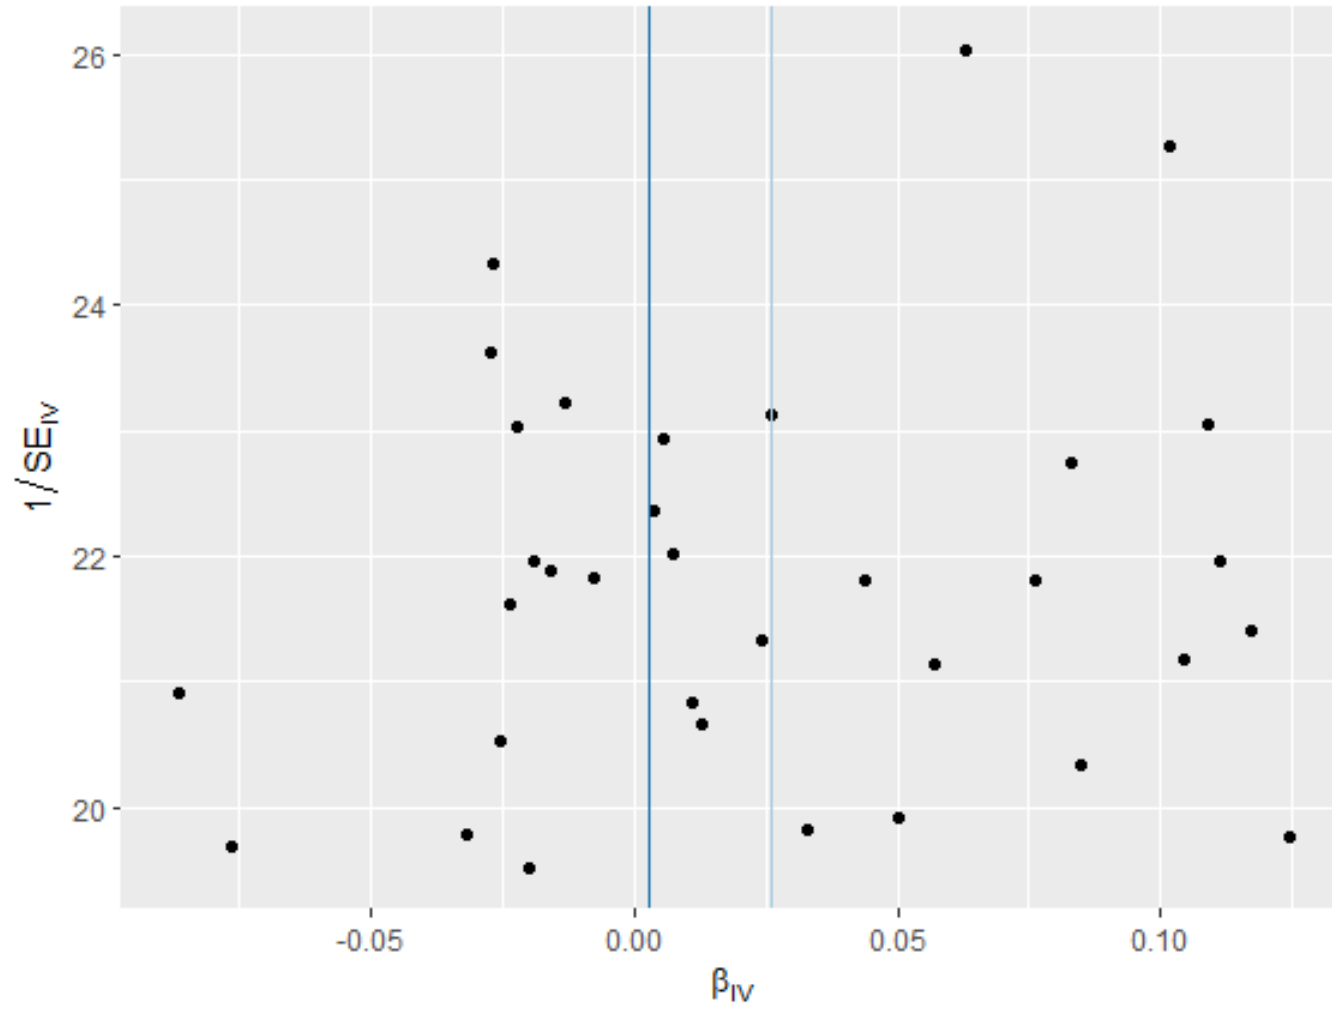

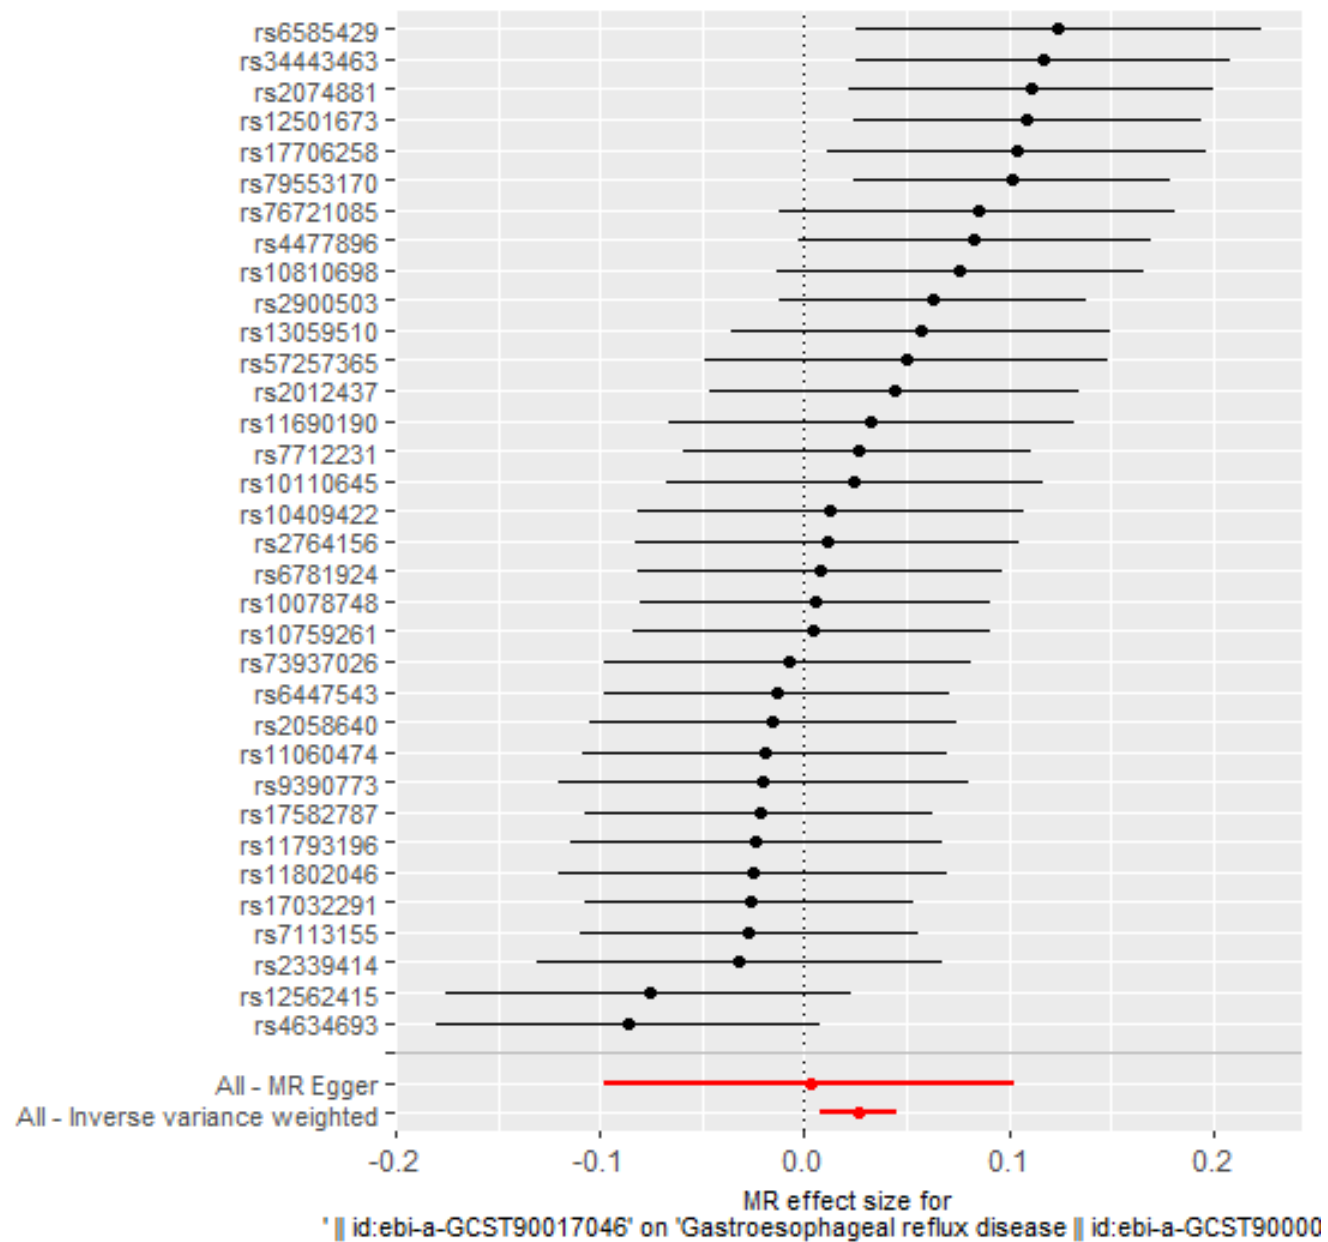

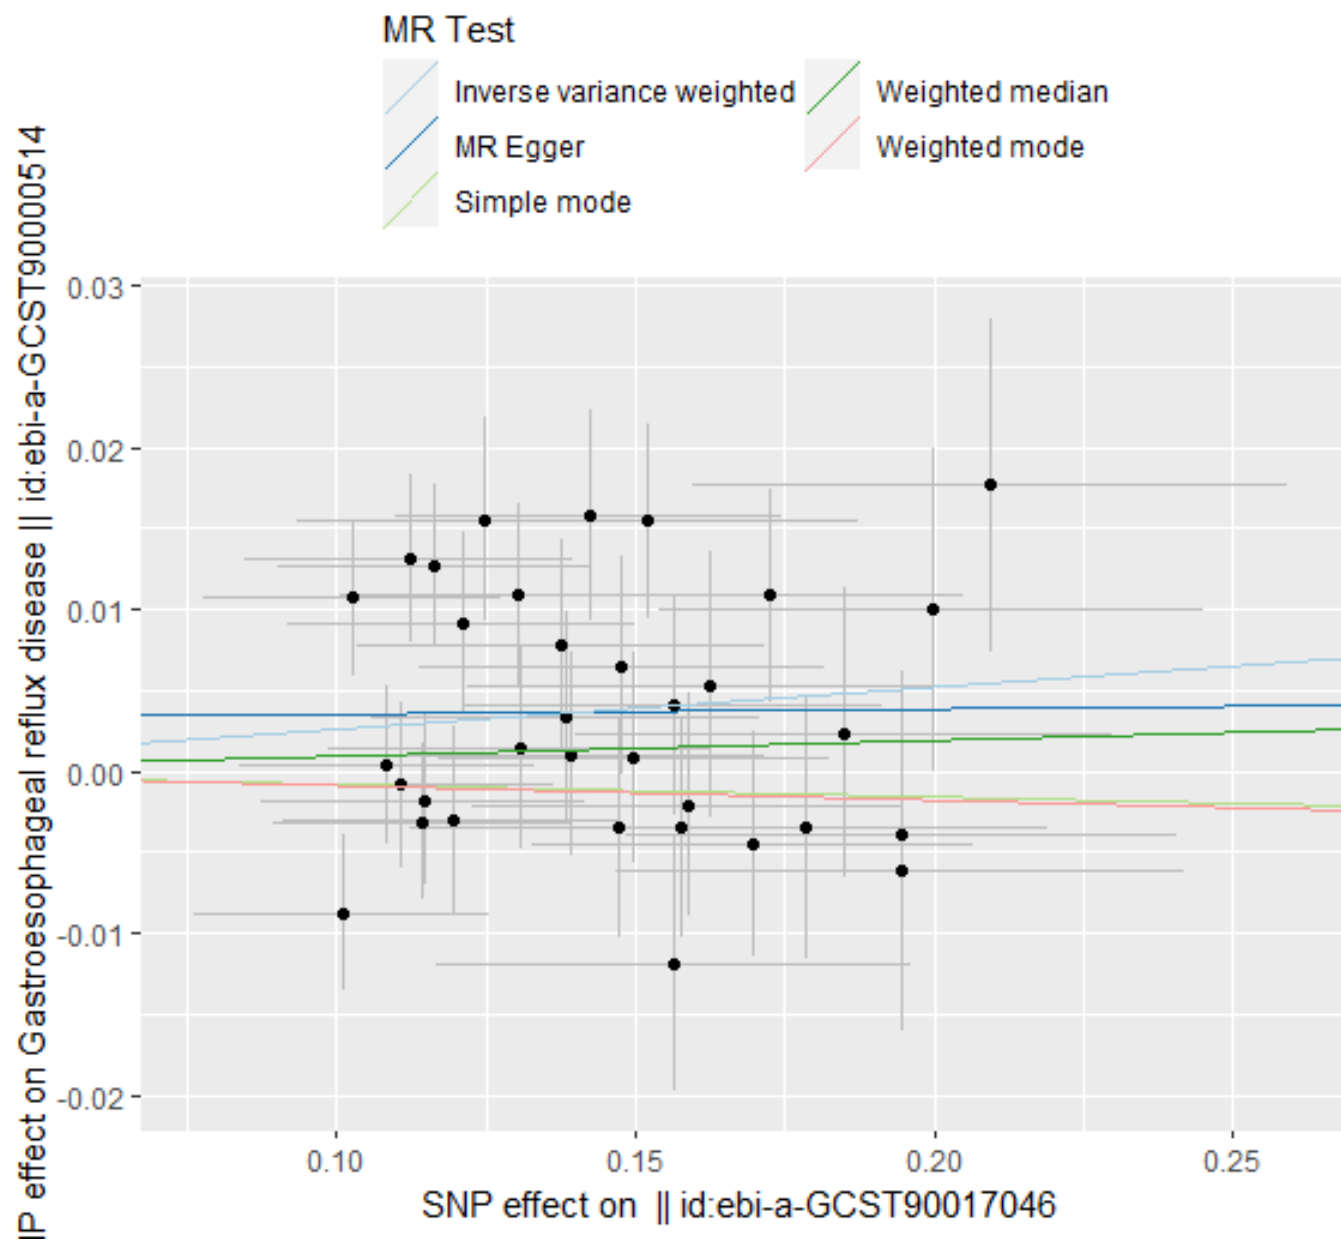



**Figure 7** Leave-one-out analysis, funnel plot, MR effect size and scatter plot for gut microbiota abundance (genus Ruminococcaceae UCG010 id.11367) on gastroesophageal reflux disease

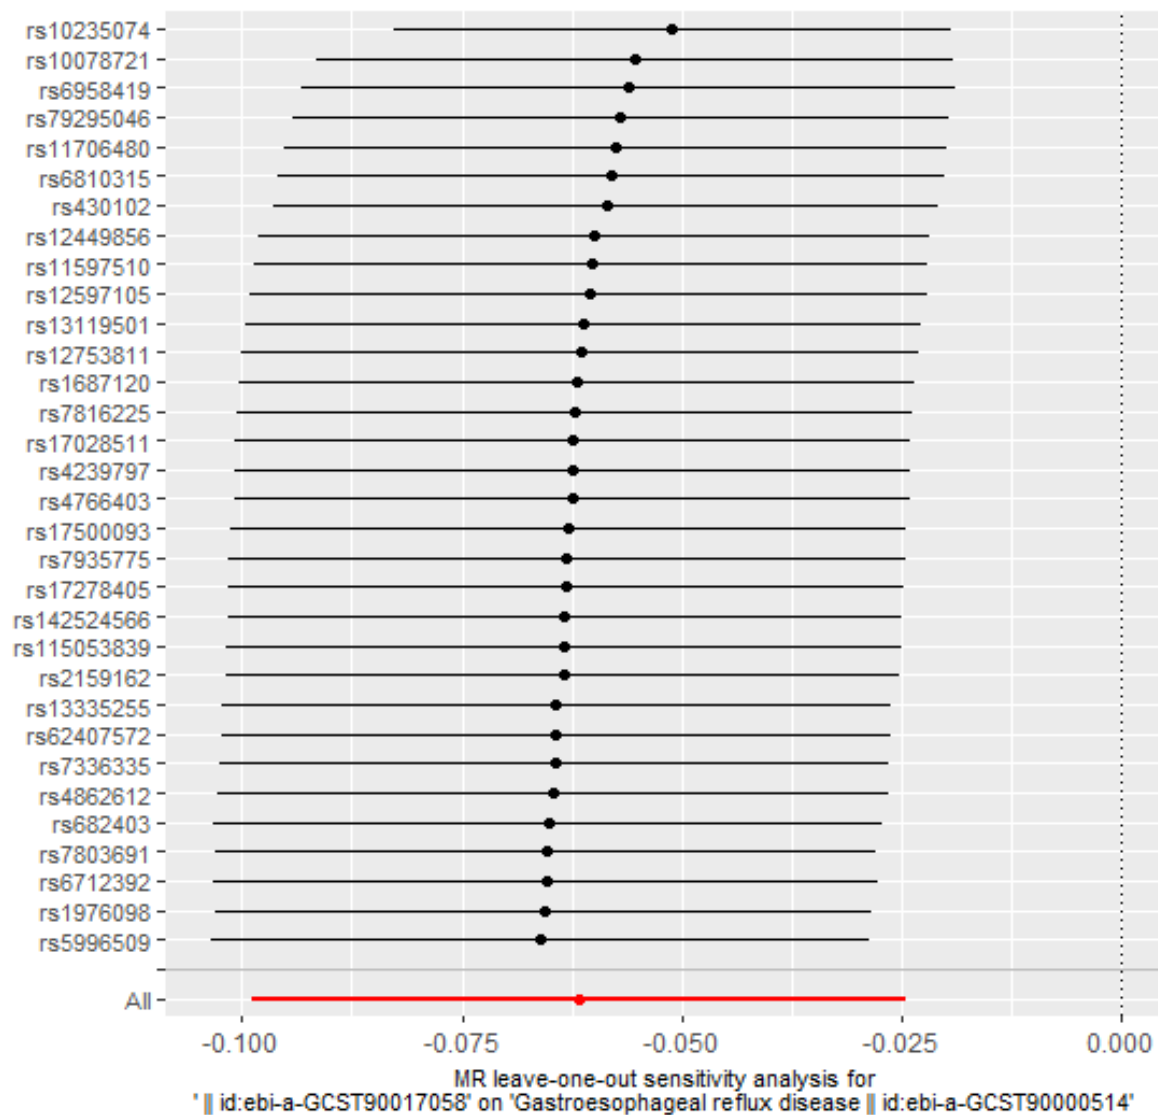

MR Method

- Inverse variance weighted
- MR Egger

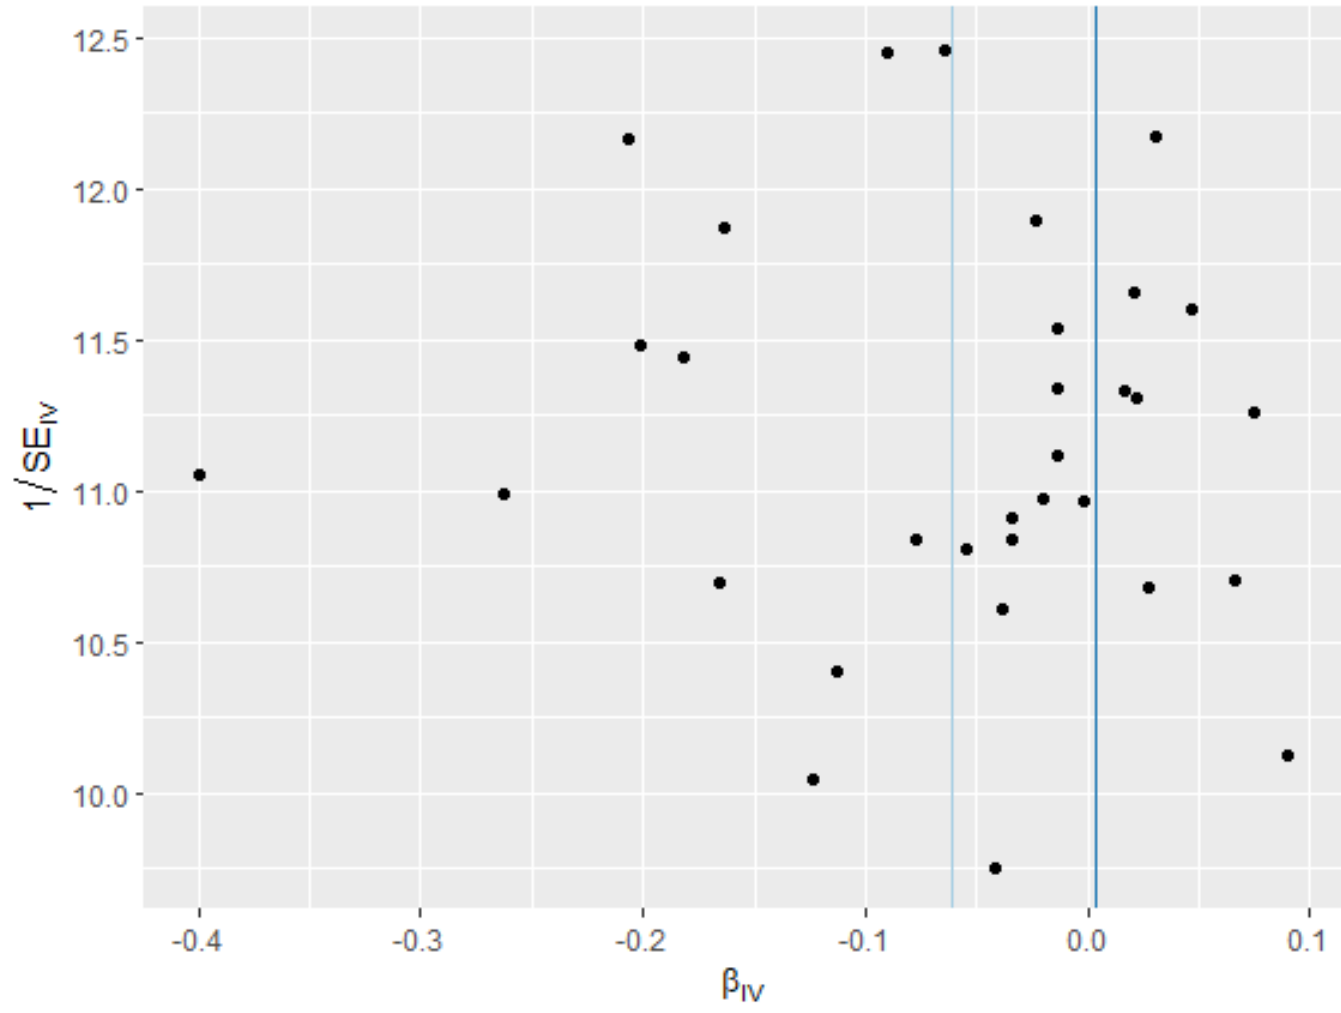

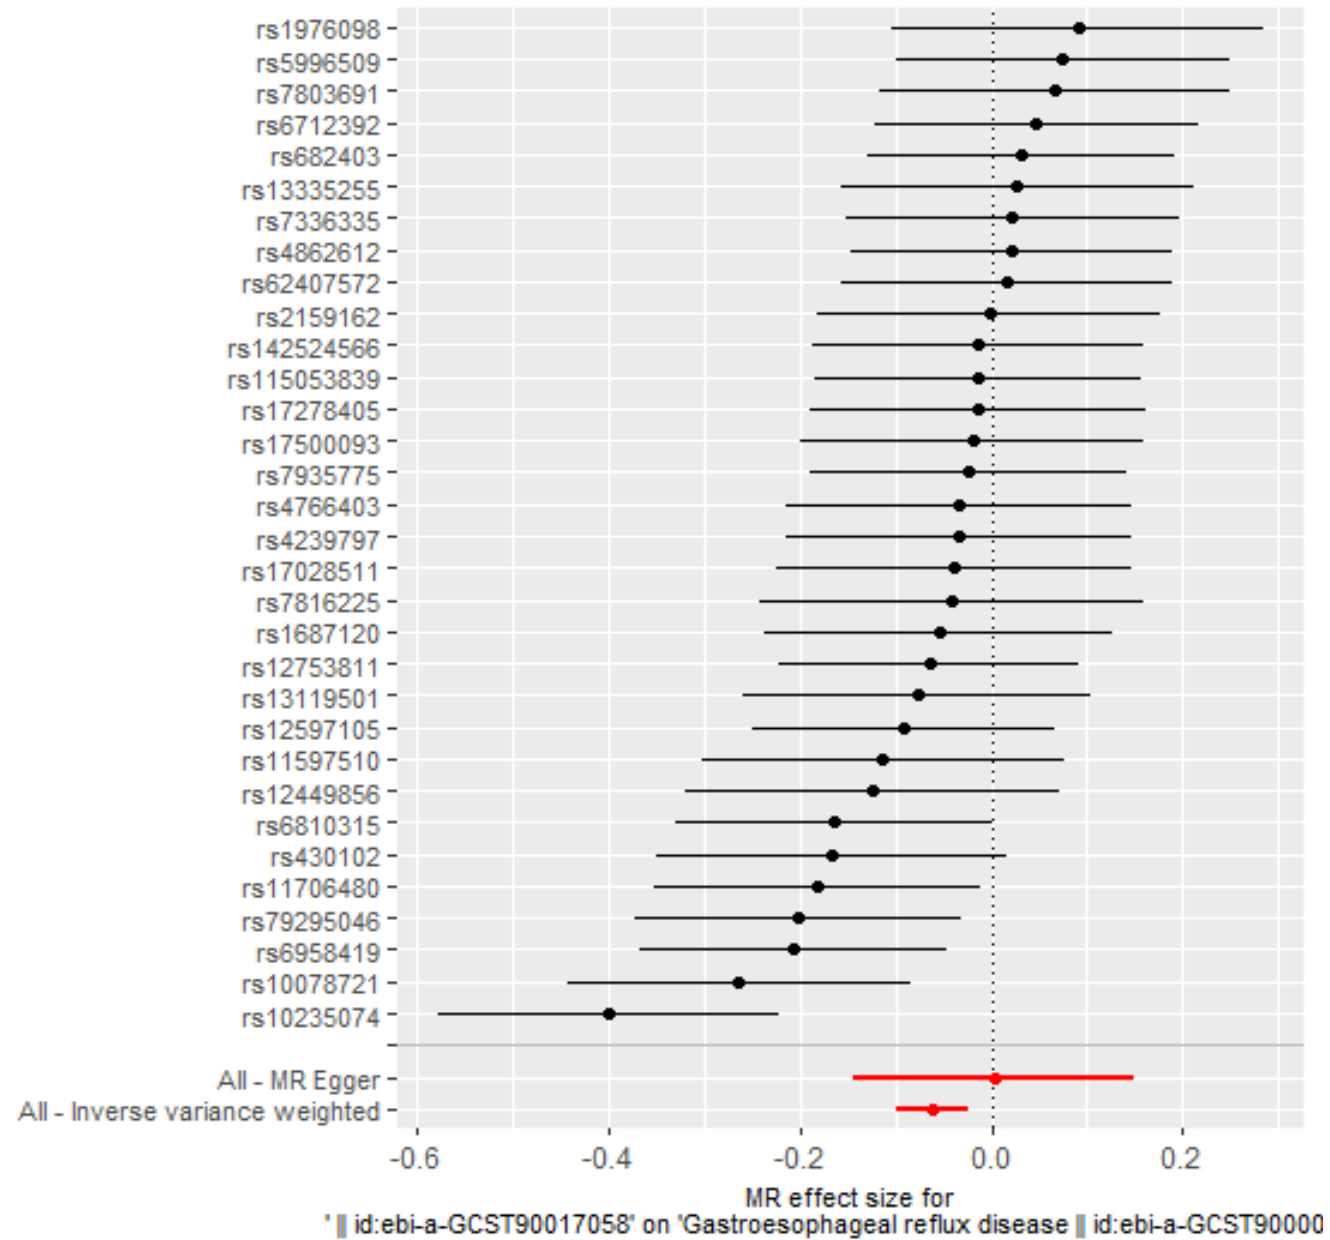

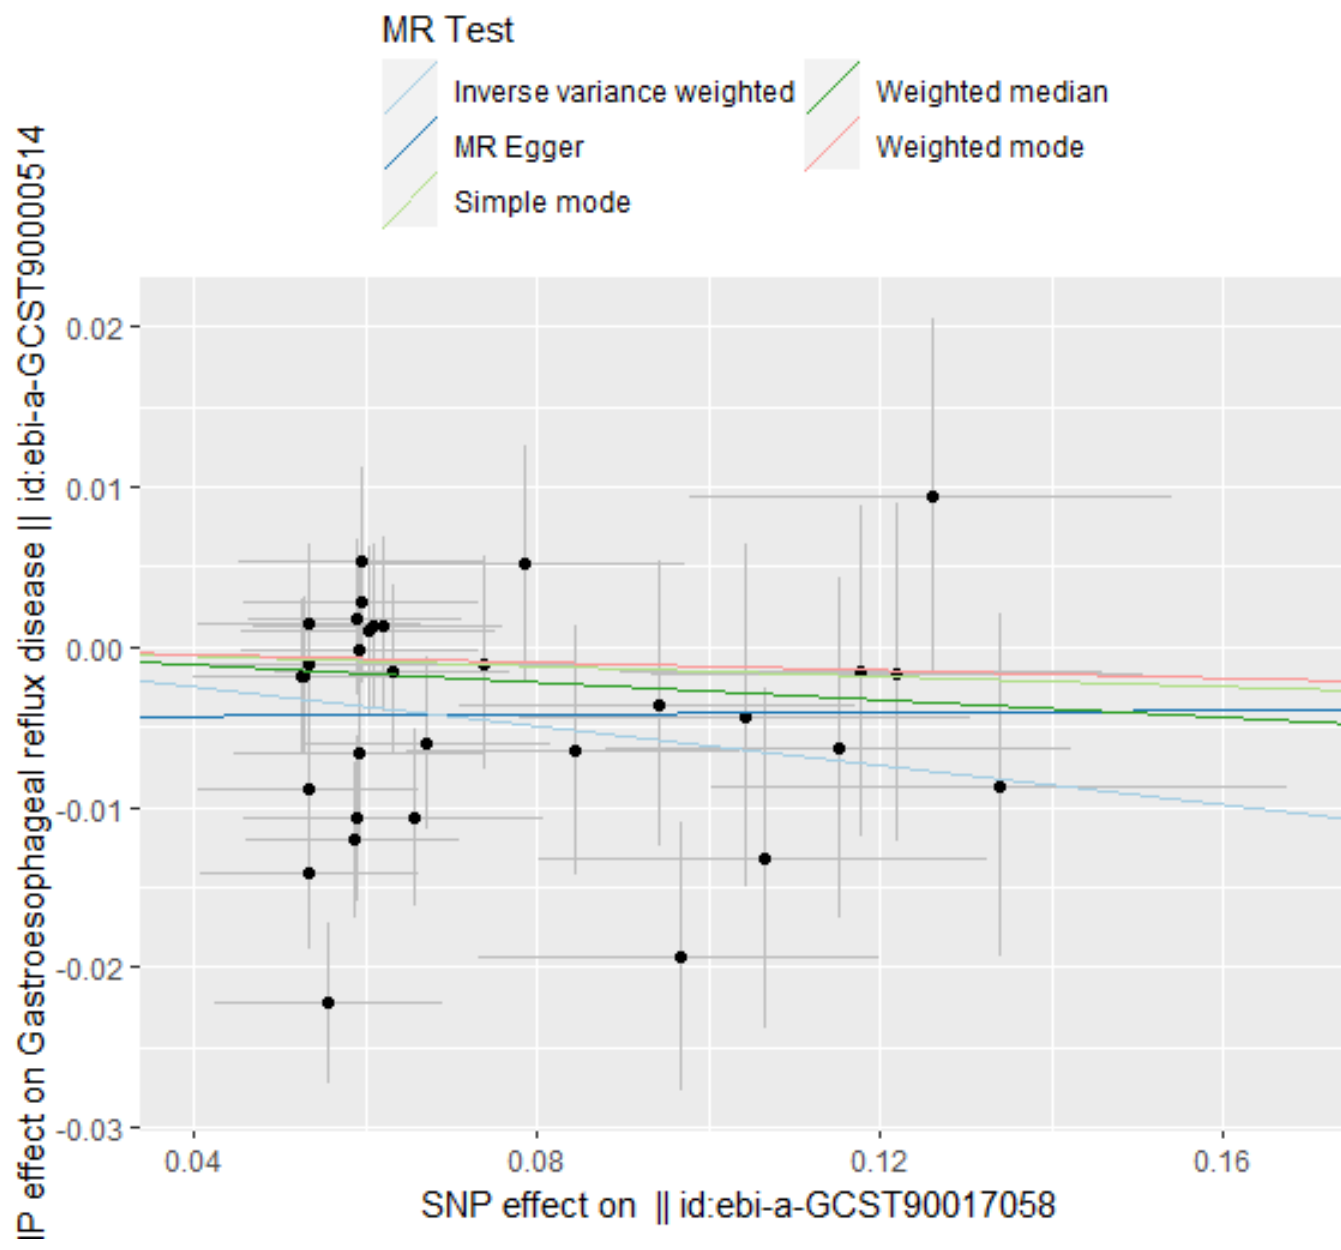

**Figure 8** Leave-one-out analysis, funnel plot, MR effect size and scatter plot for gut microbiota abundance (genus *Sellimonas* id.14369) on gastroesophageal reflux disease

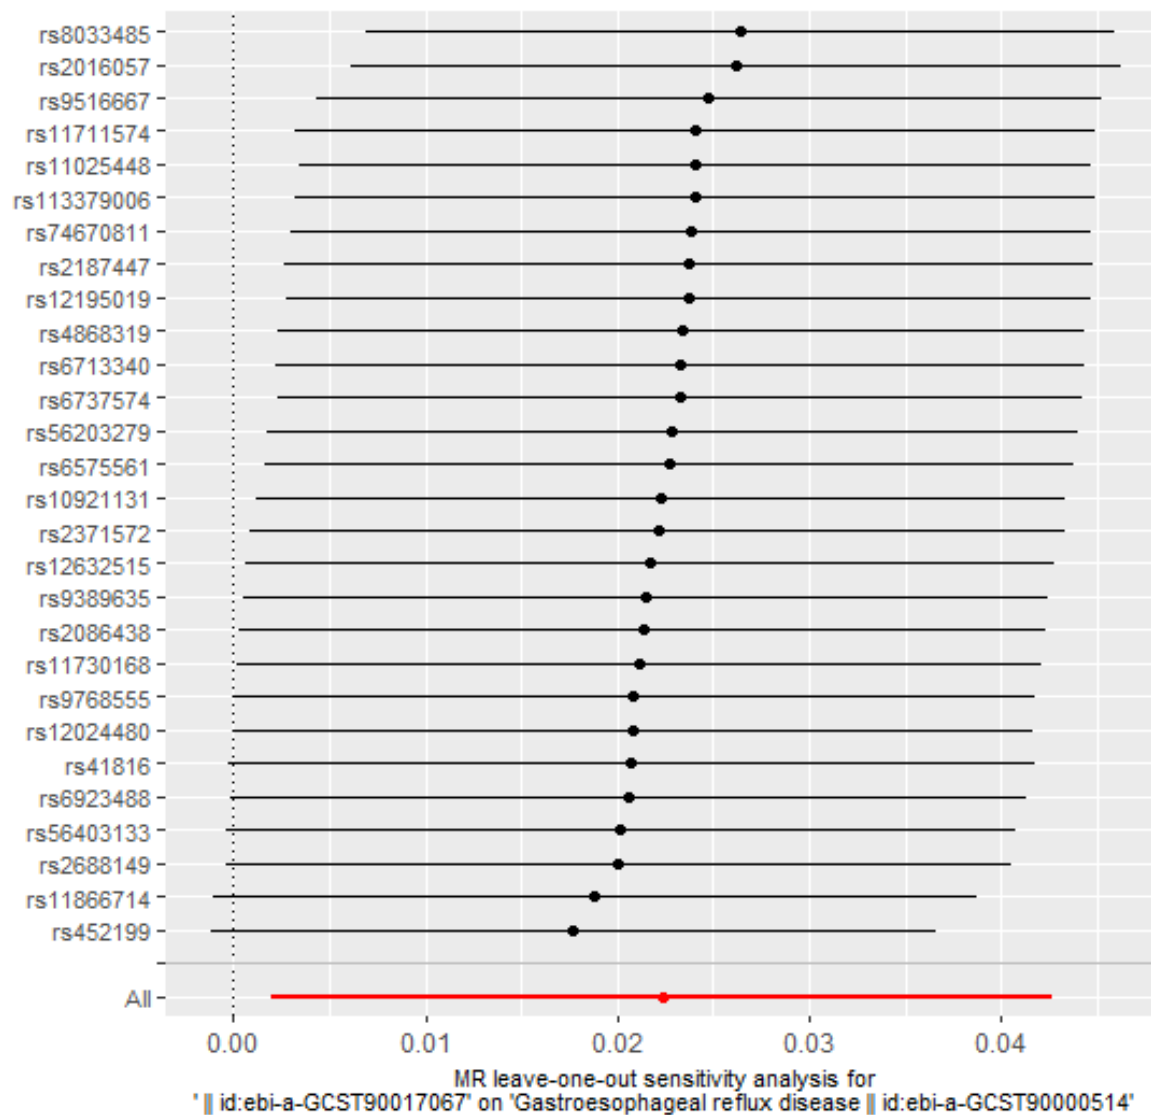

MR Method

- Inverse variance weighted
- MR Egger

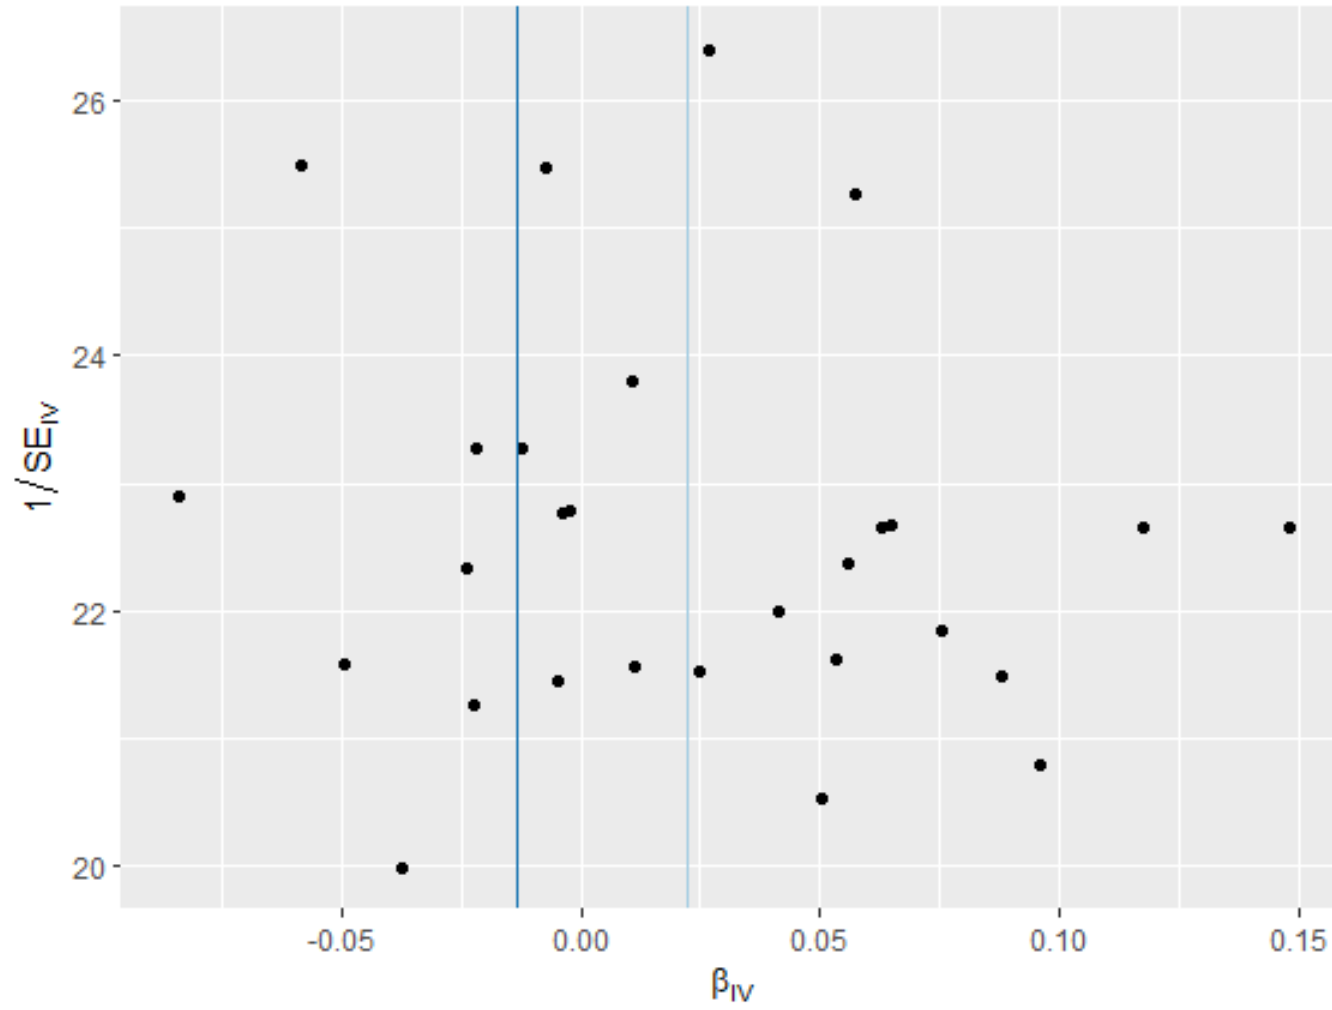

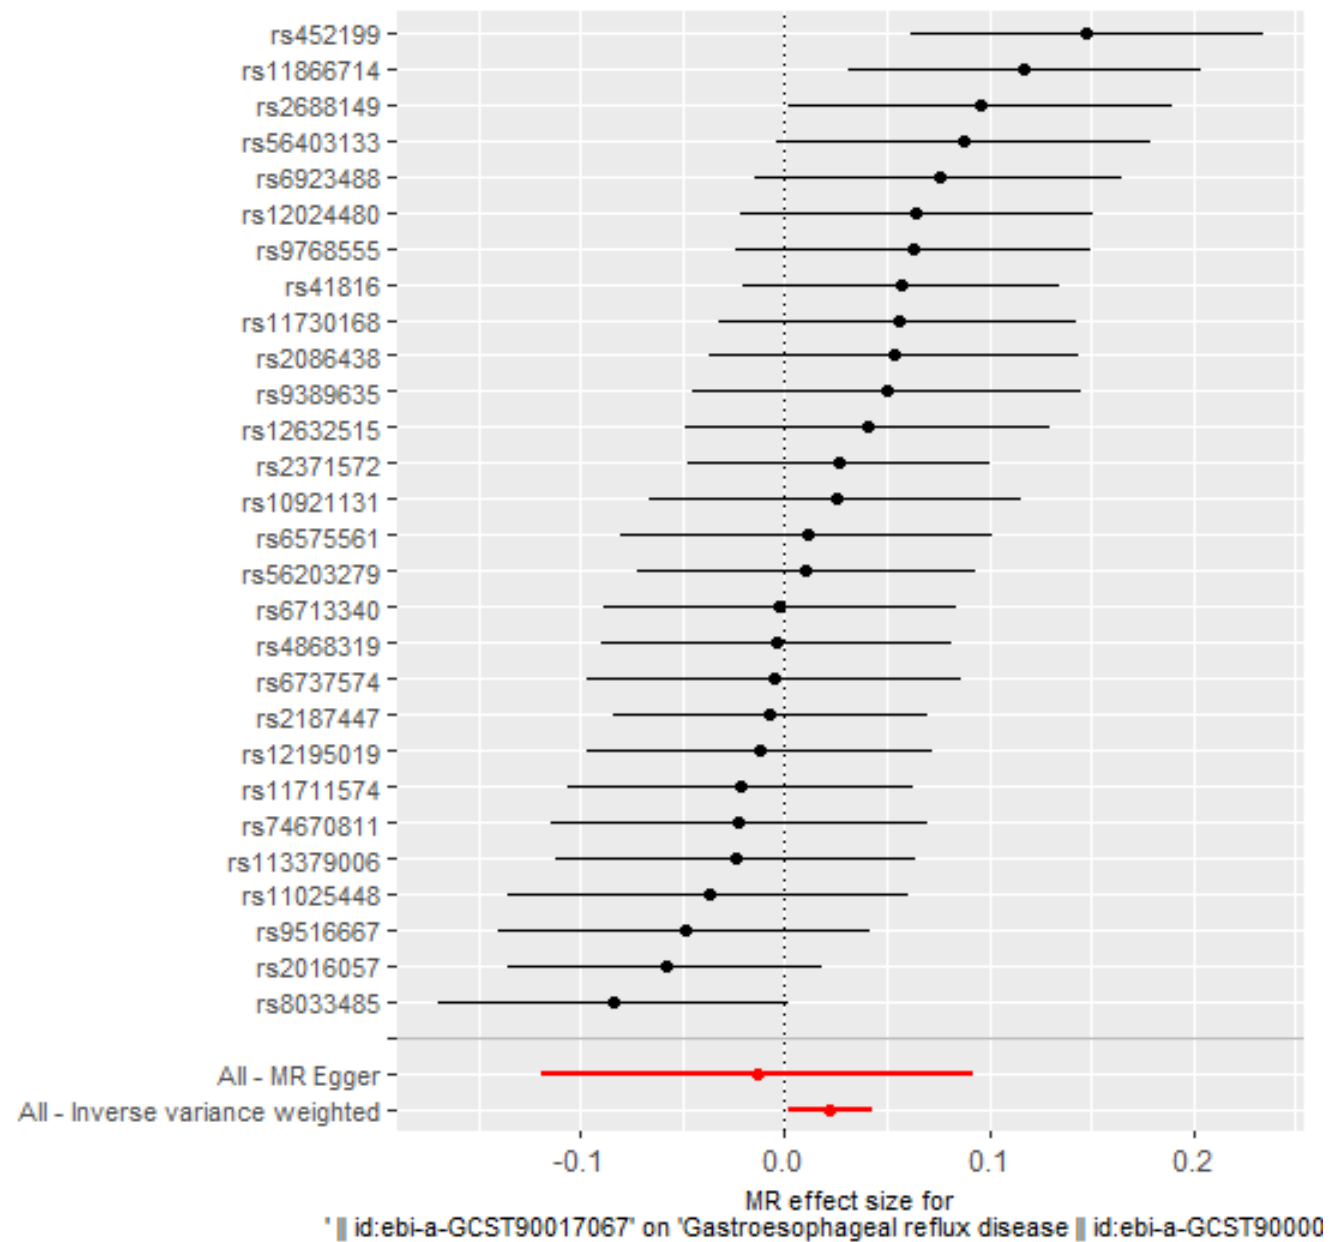

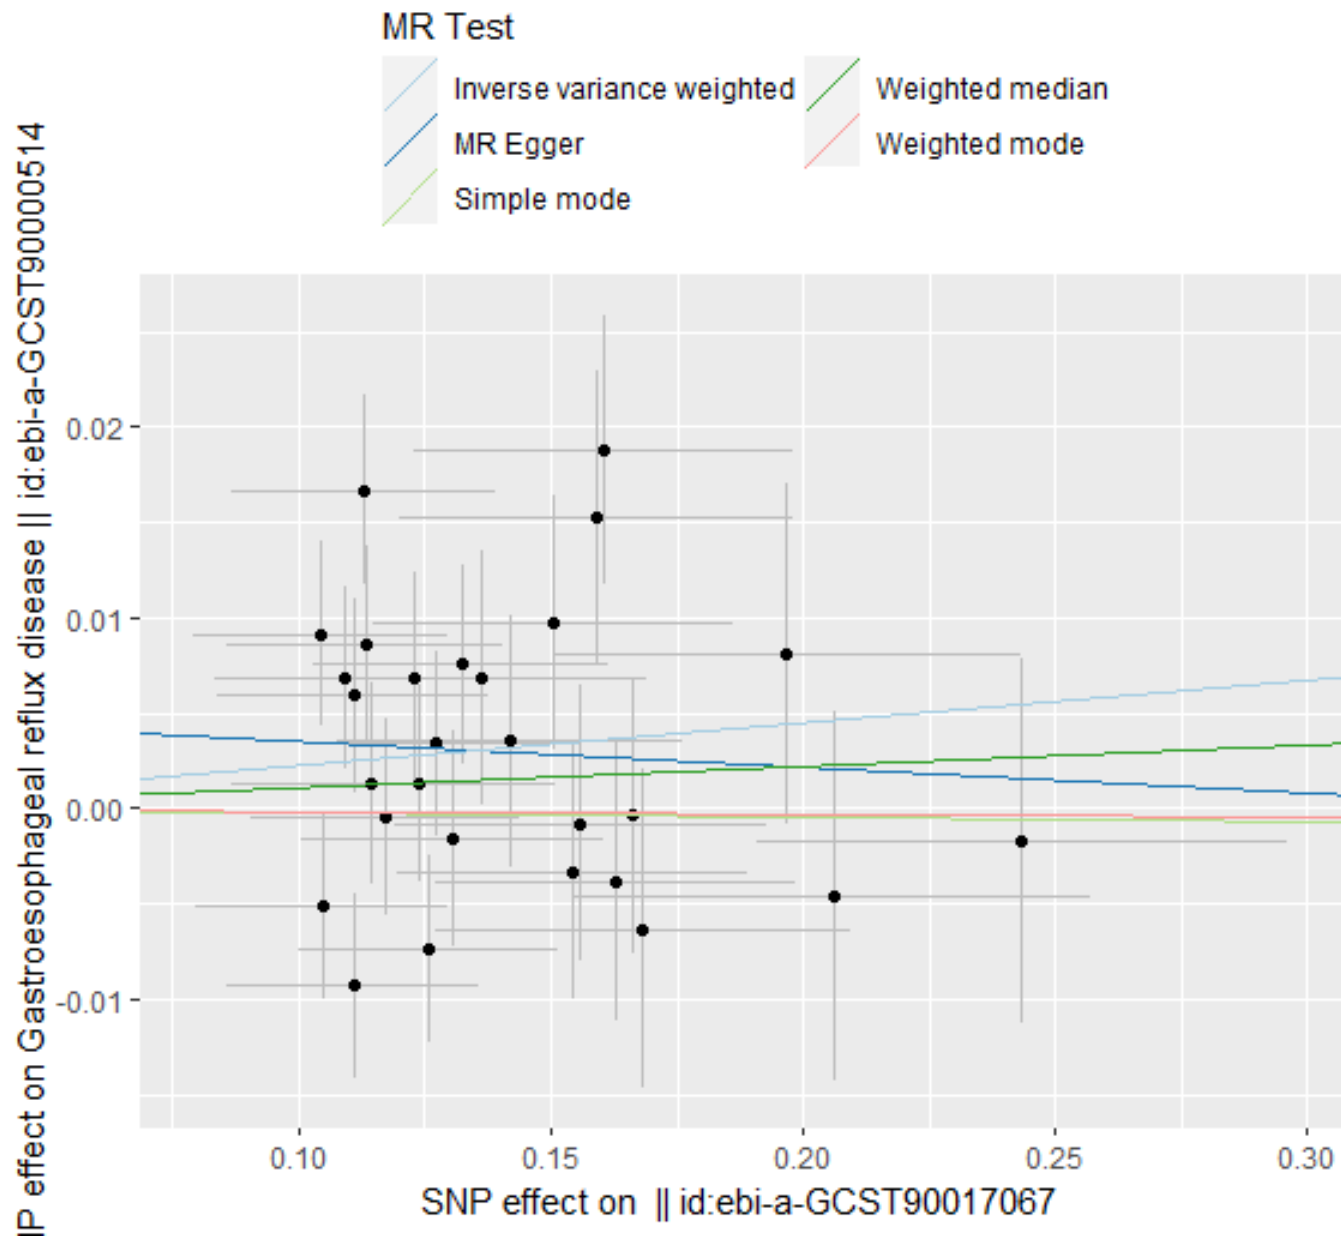



**Figure 9** Leave-one-out analysis, funnel plot, MR effect size and scatter plot for gut microbiota abundance (genus Slackia id.825) on gastroesophageal reflux disease



MR Method

- Inverse variance weighted
- MR Egger





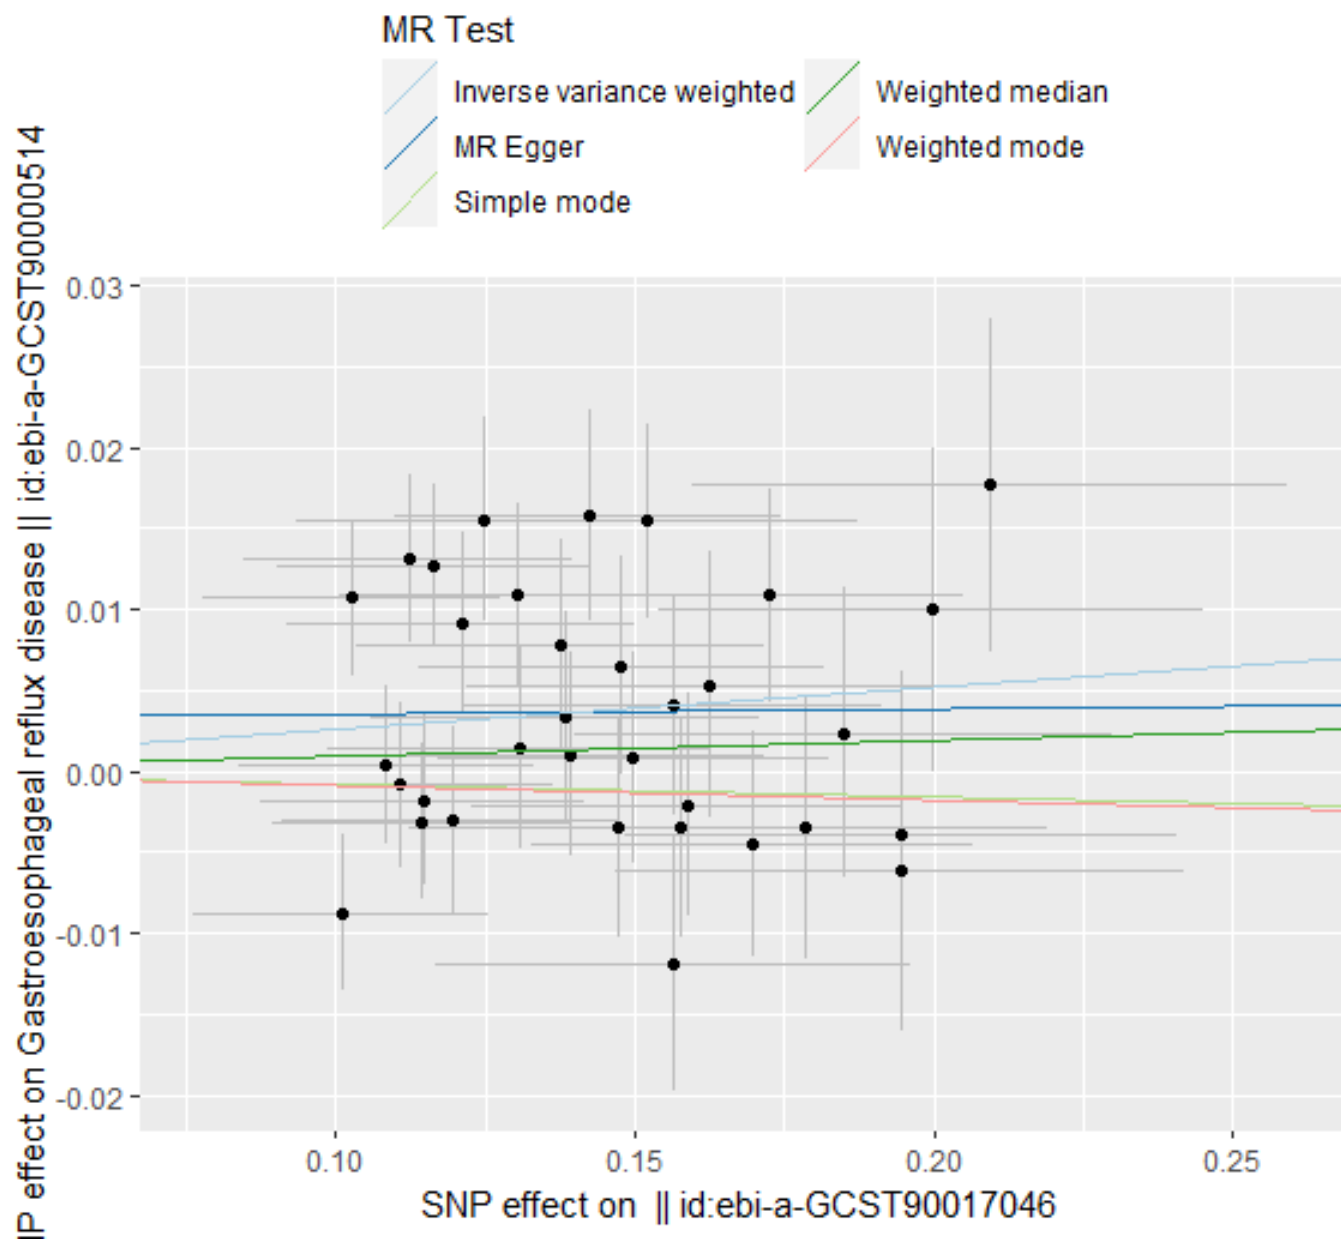

**Figure 10** Leave-one-out analysis, funnel plot, MR effect size and scatter plot for gut microbiota abundance (phylum Firmicutes id.1672) on gastroesophageal reflux disease

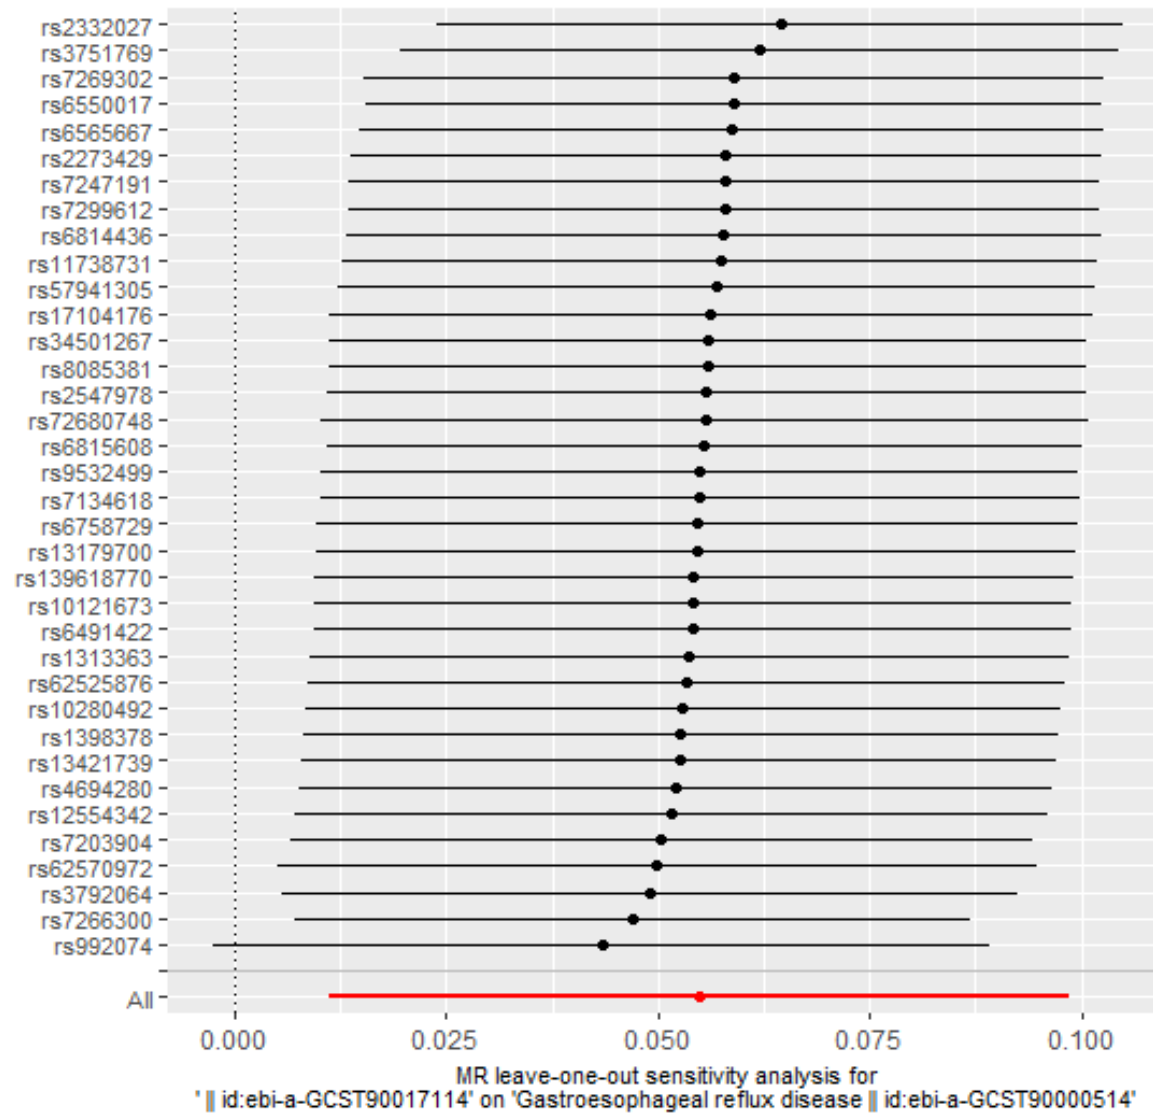

MR Method

- Inverse variance weighted
- MR Egger

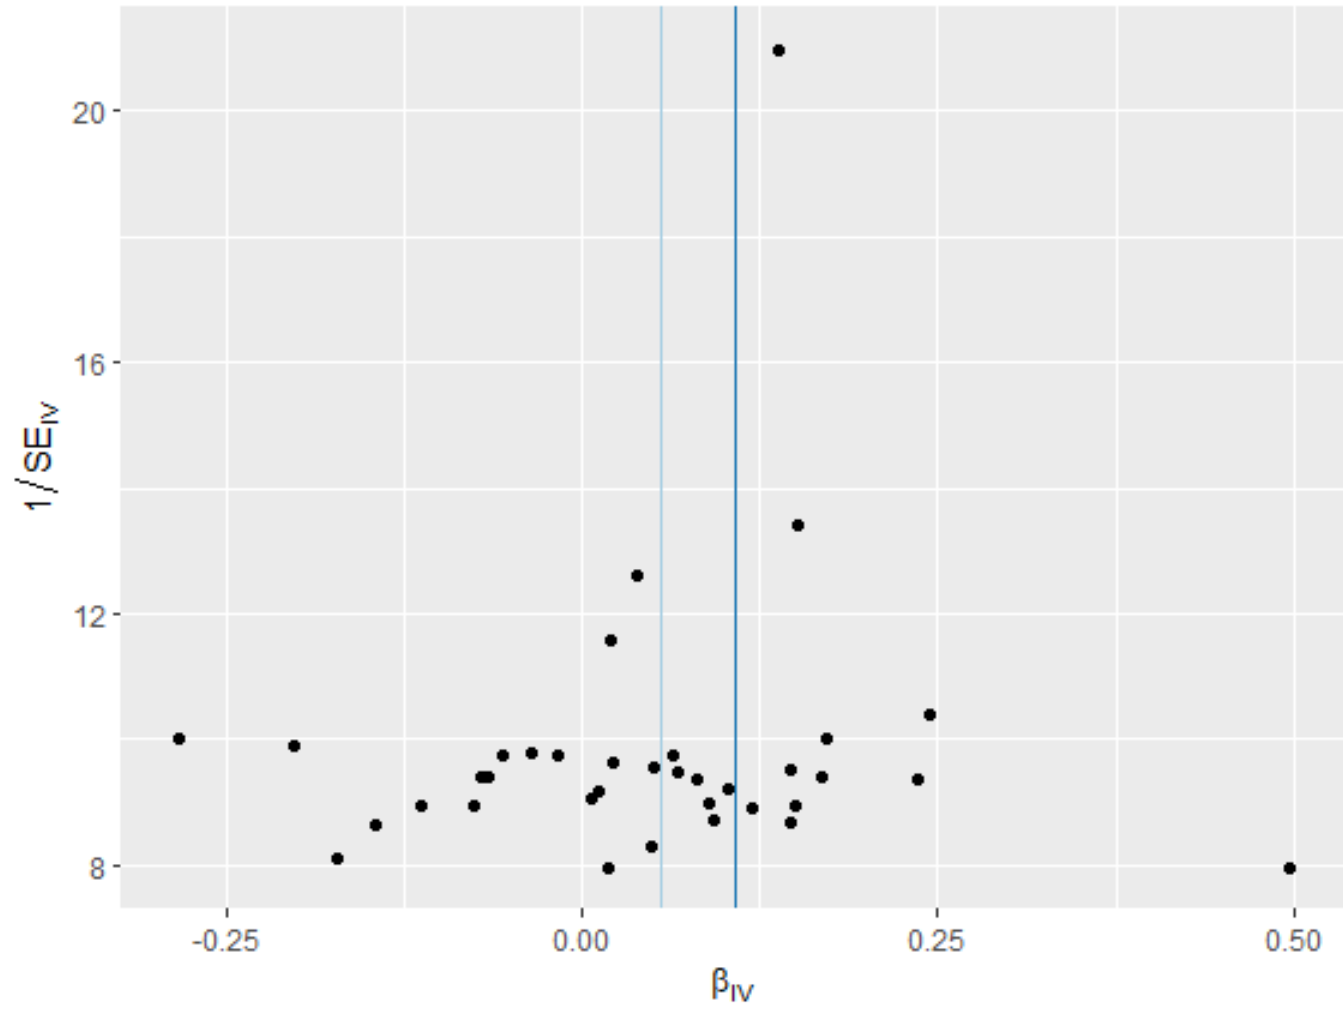

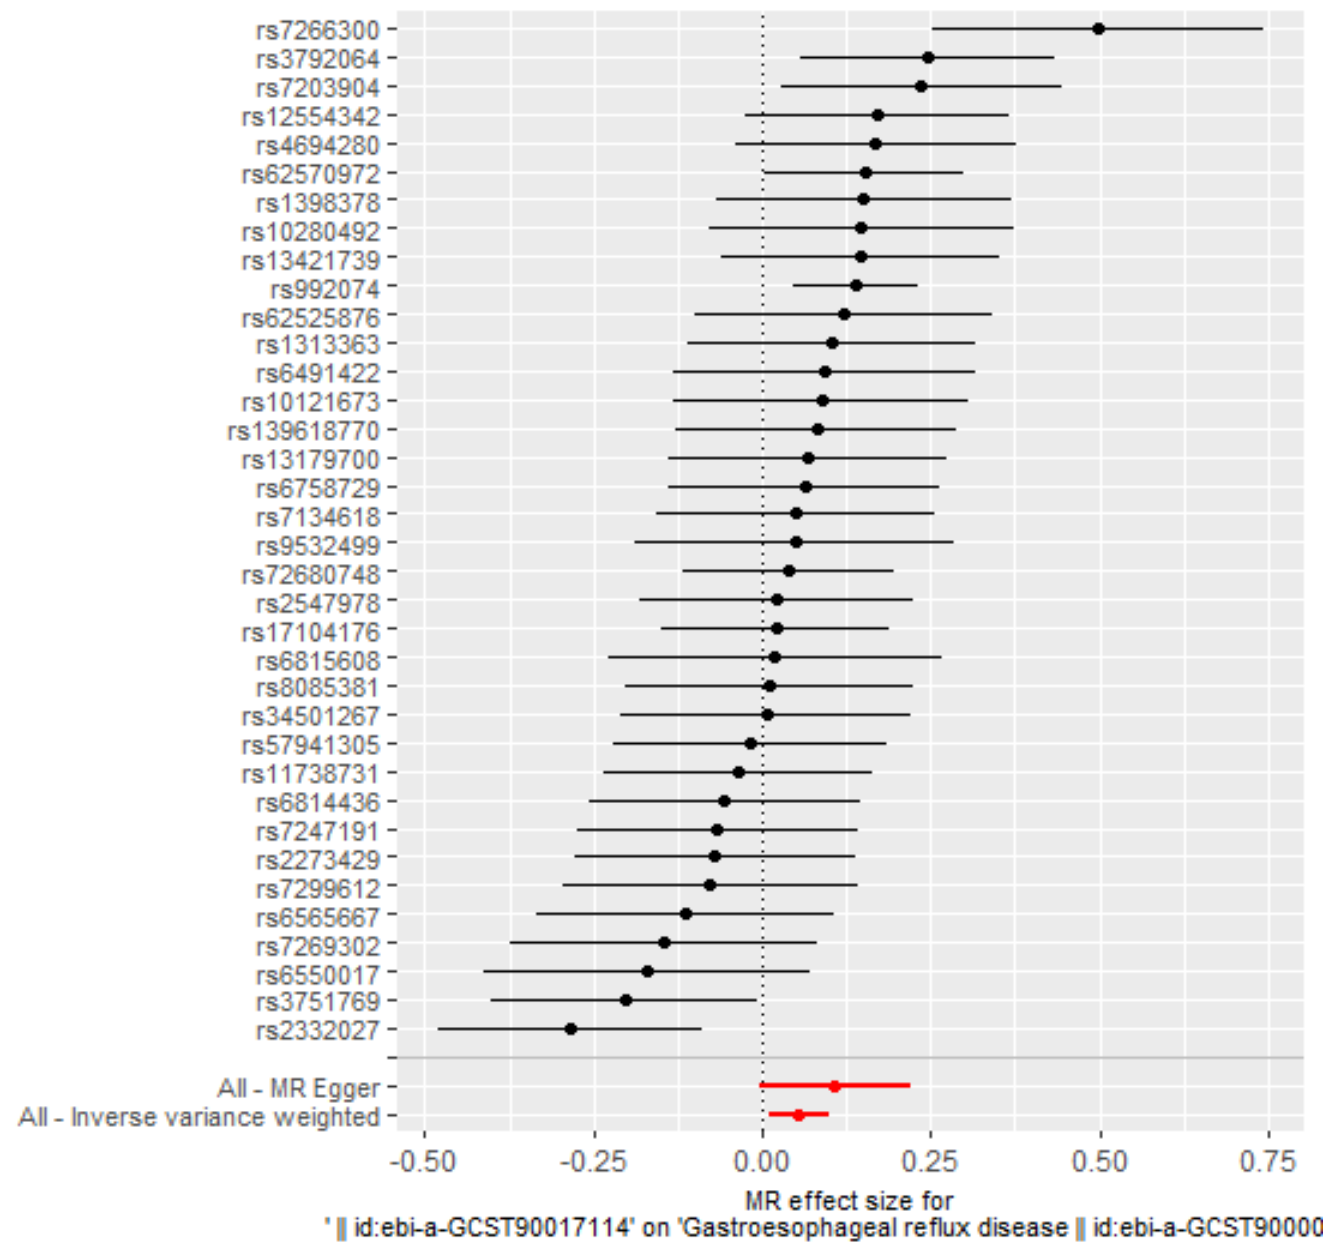

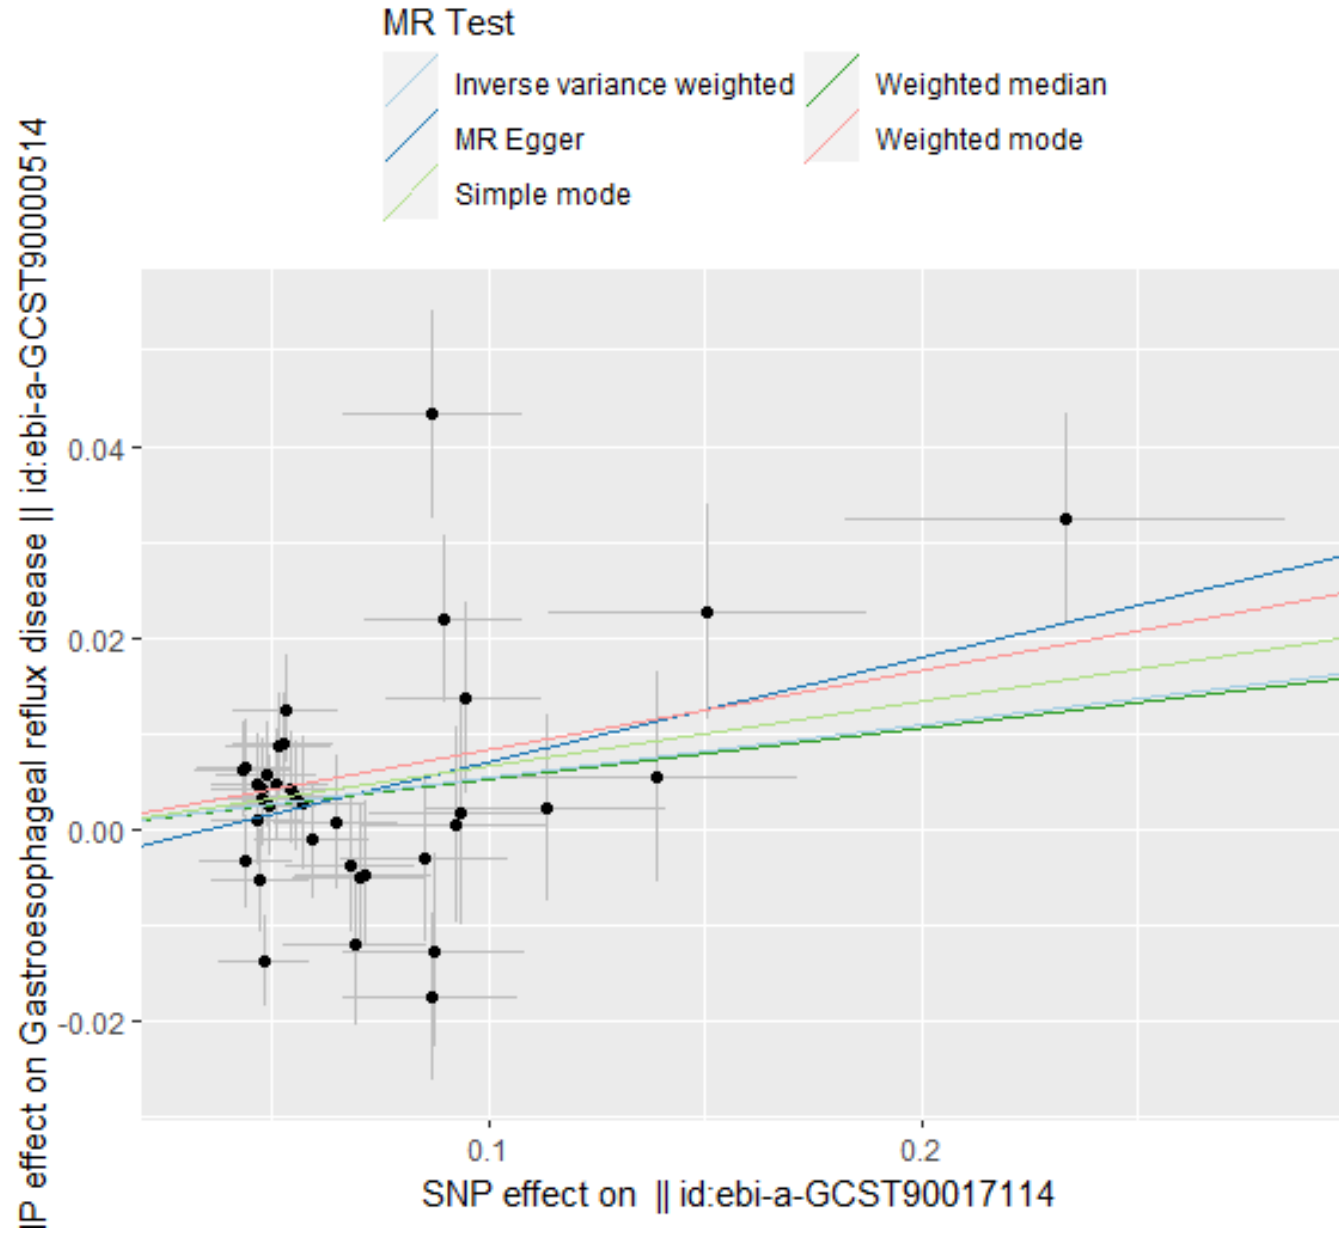



**Figure 11** Leave-one-out analysis, funnel plot, MR effect size and scatter plot for gut microbiota abundance (class Actinobacteria id.419) on oesophageal cancer

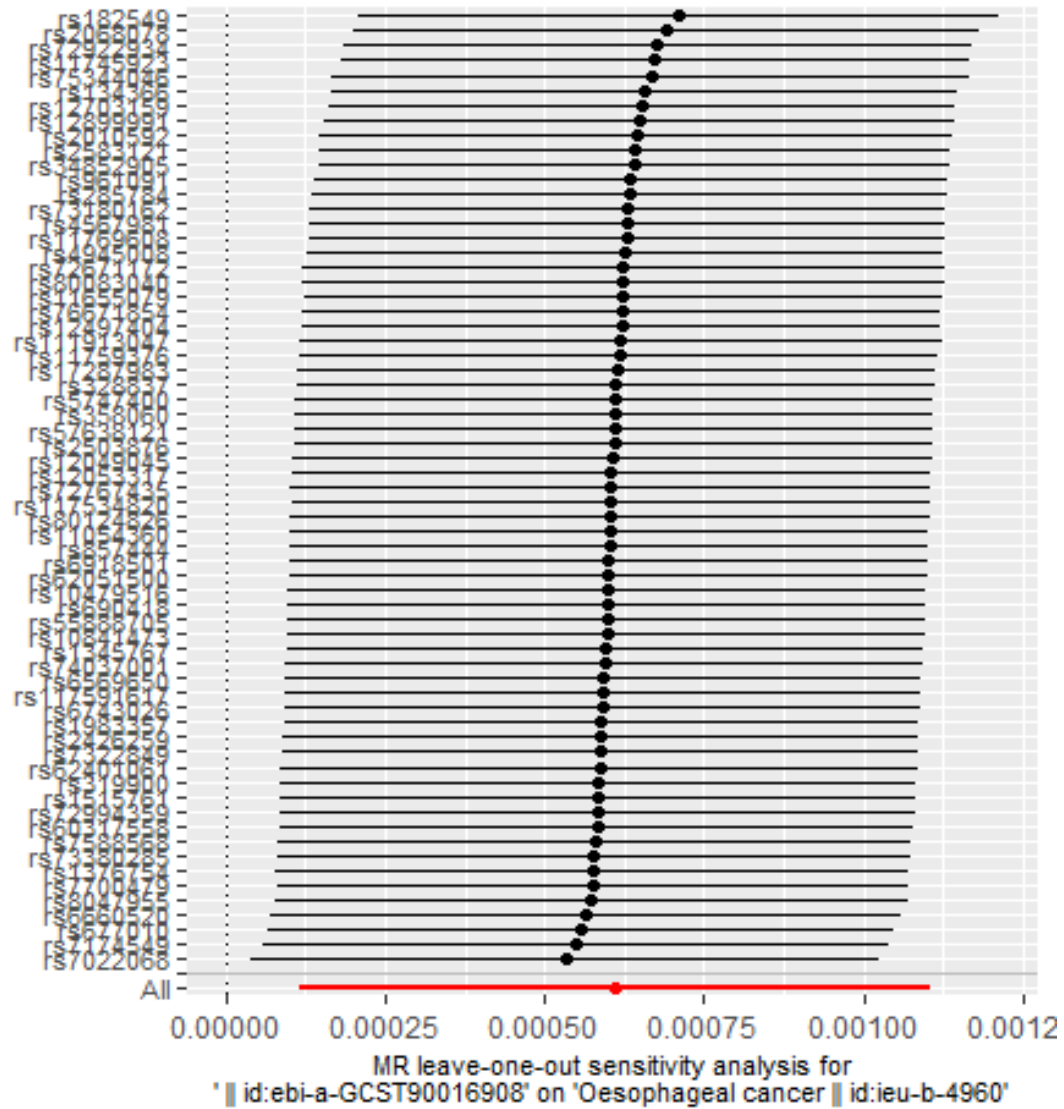

MR Method

- Inverse variance weighted
- MR Egger

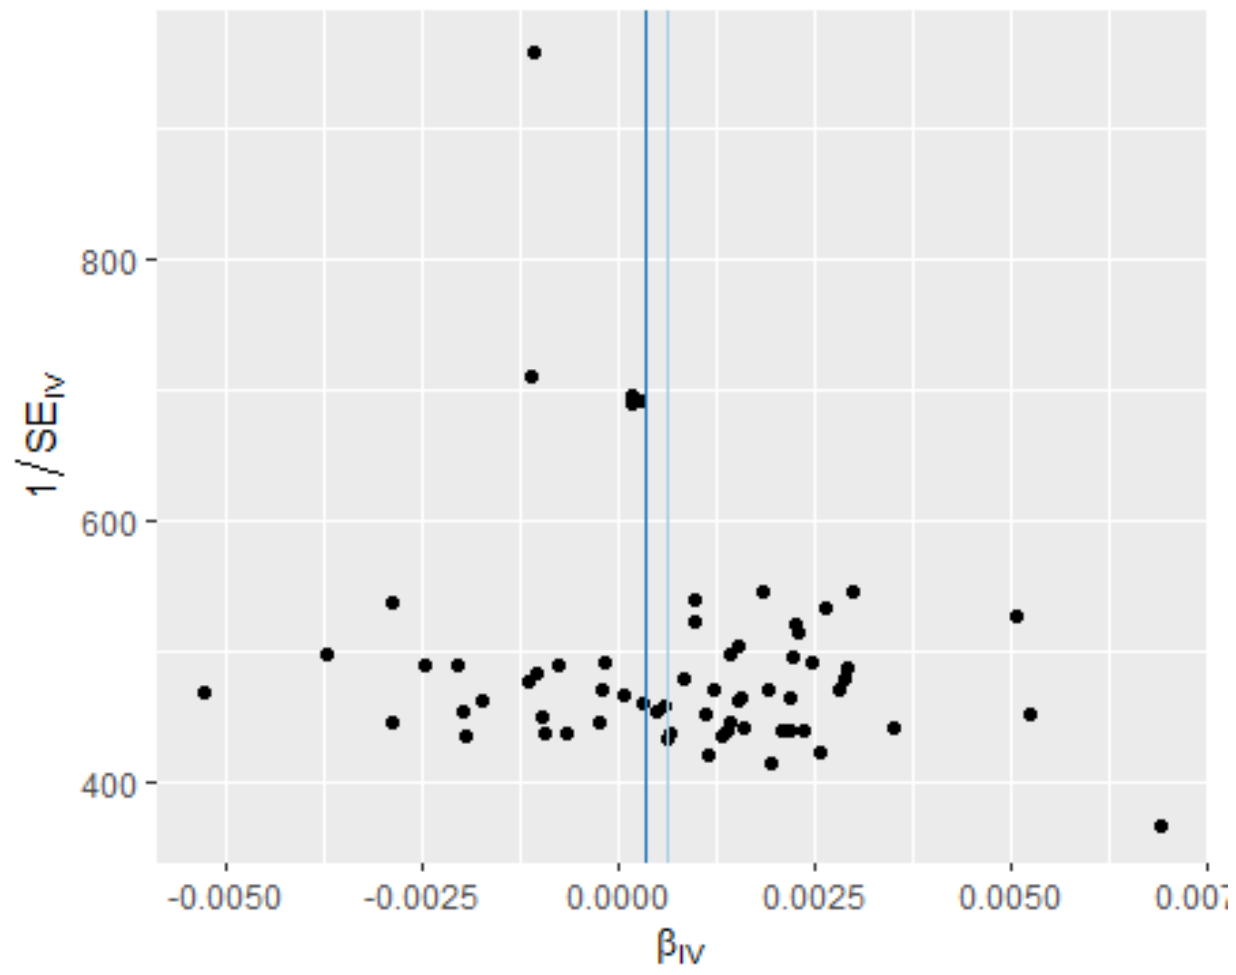

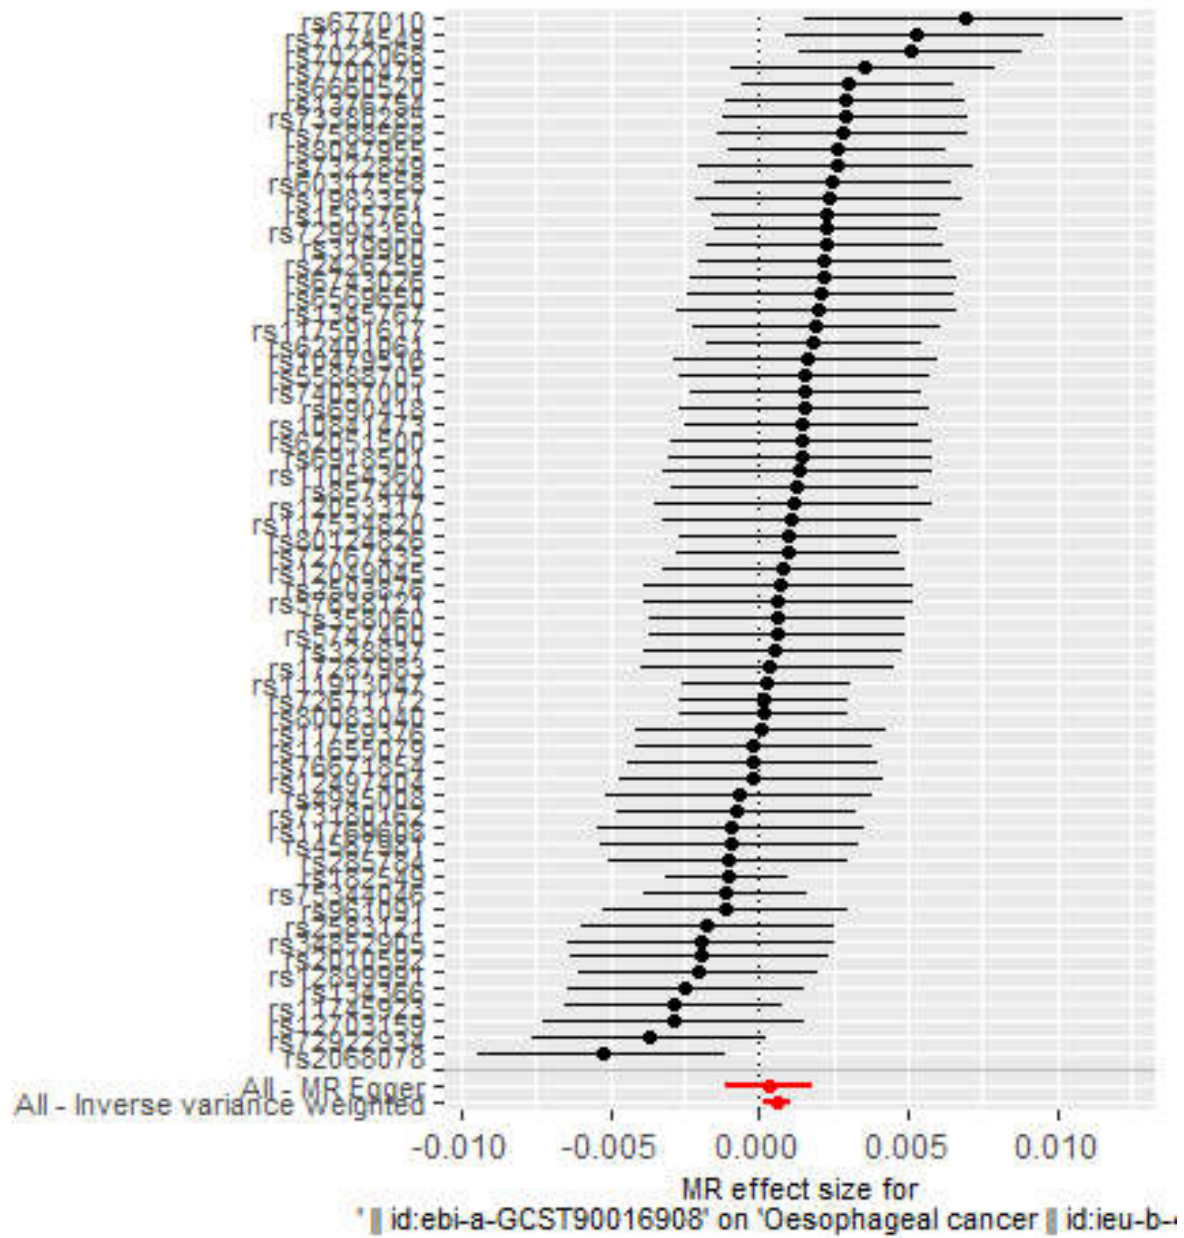

### MR Test

- Inverse variance weighted
- MR Egger
- Simple mode
- Weighted median
- Weighted mode

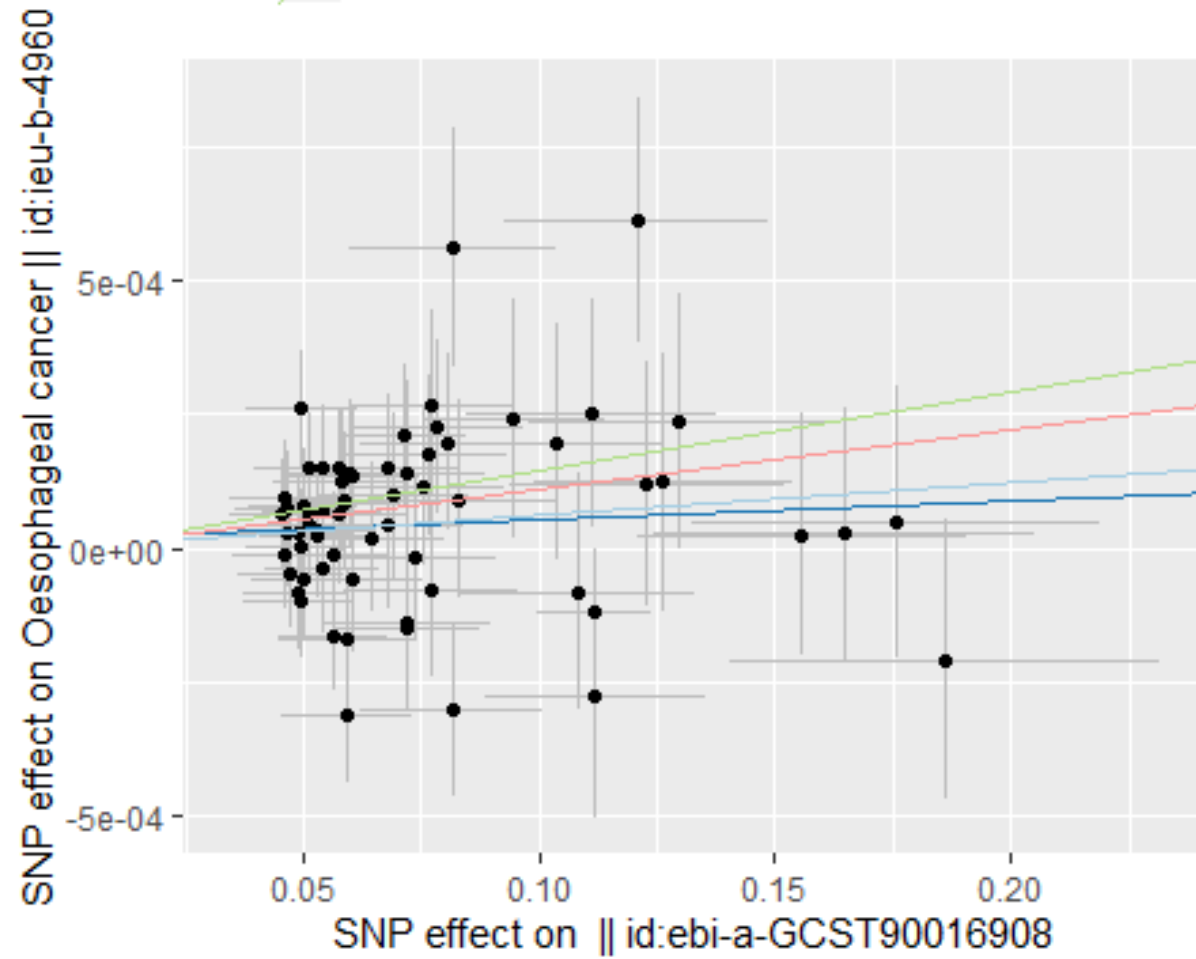

**Figure 12** Leave-one-out analysis, funnel plot, MR effect size and scatter plot for gut microbiota abundance (family Clostridiaceae1 id.1869) on oesophageal cancer

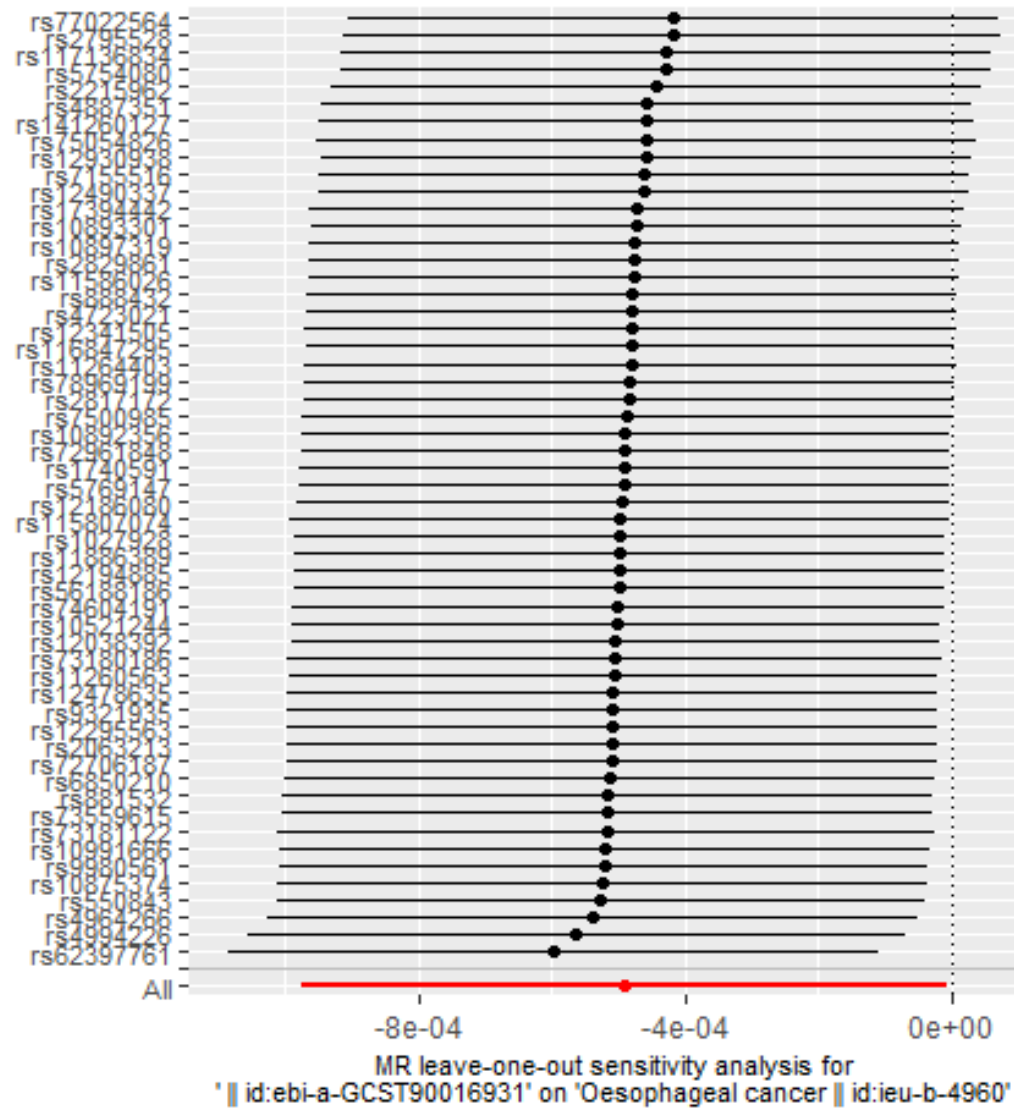

### MR Method

- Inverse variance weighted
- MR Egger

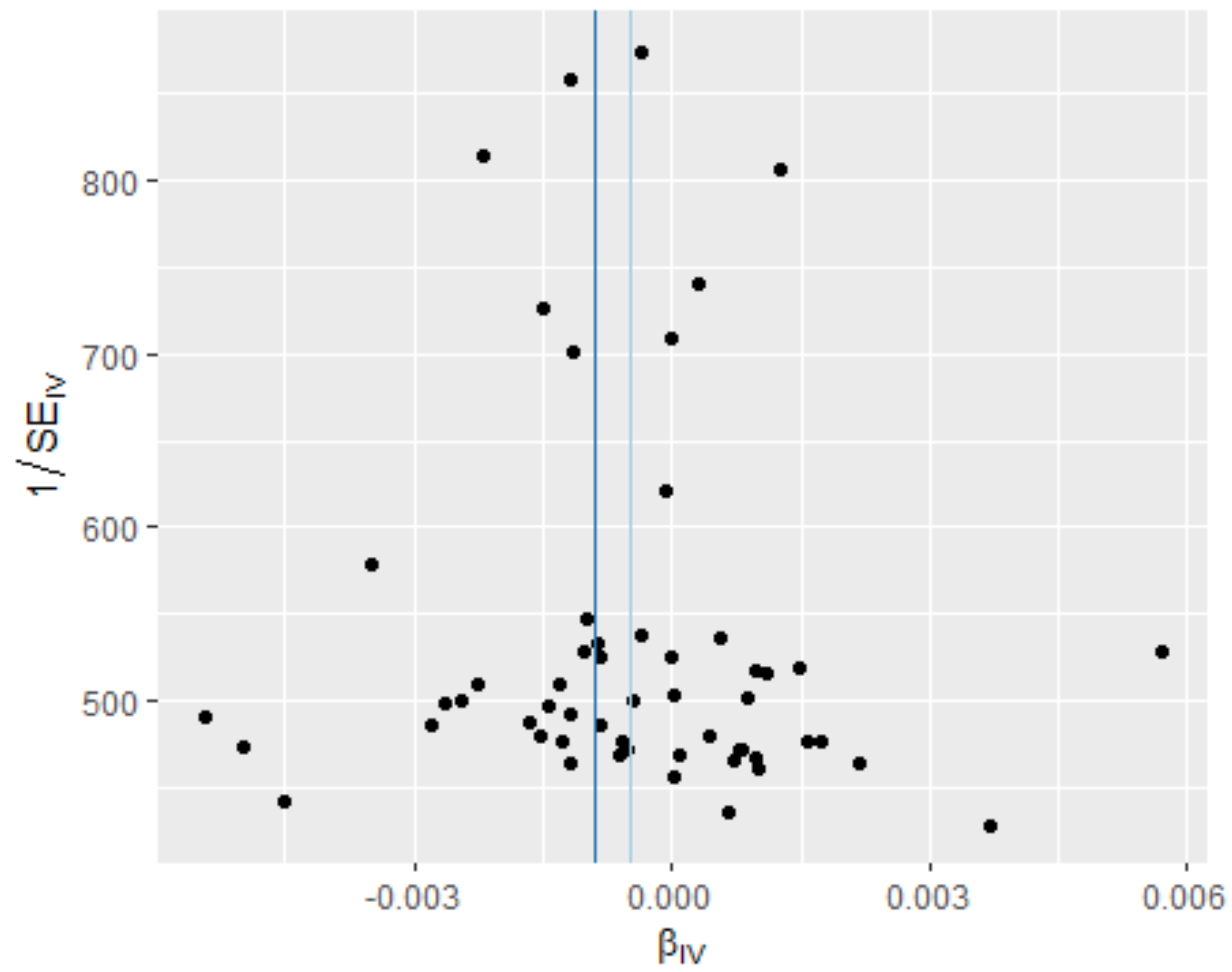

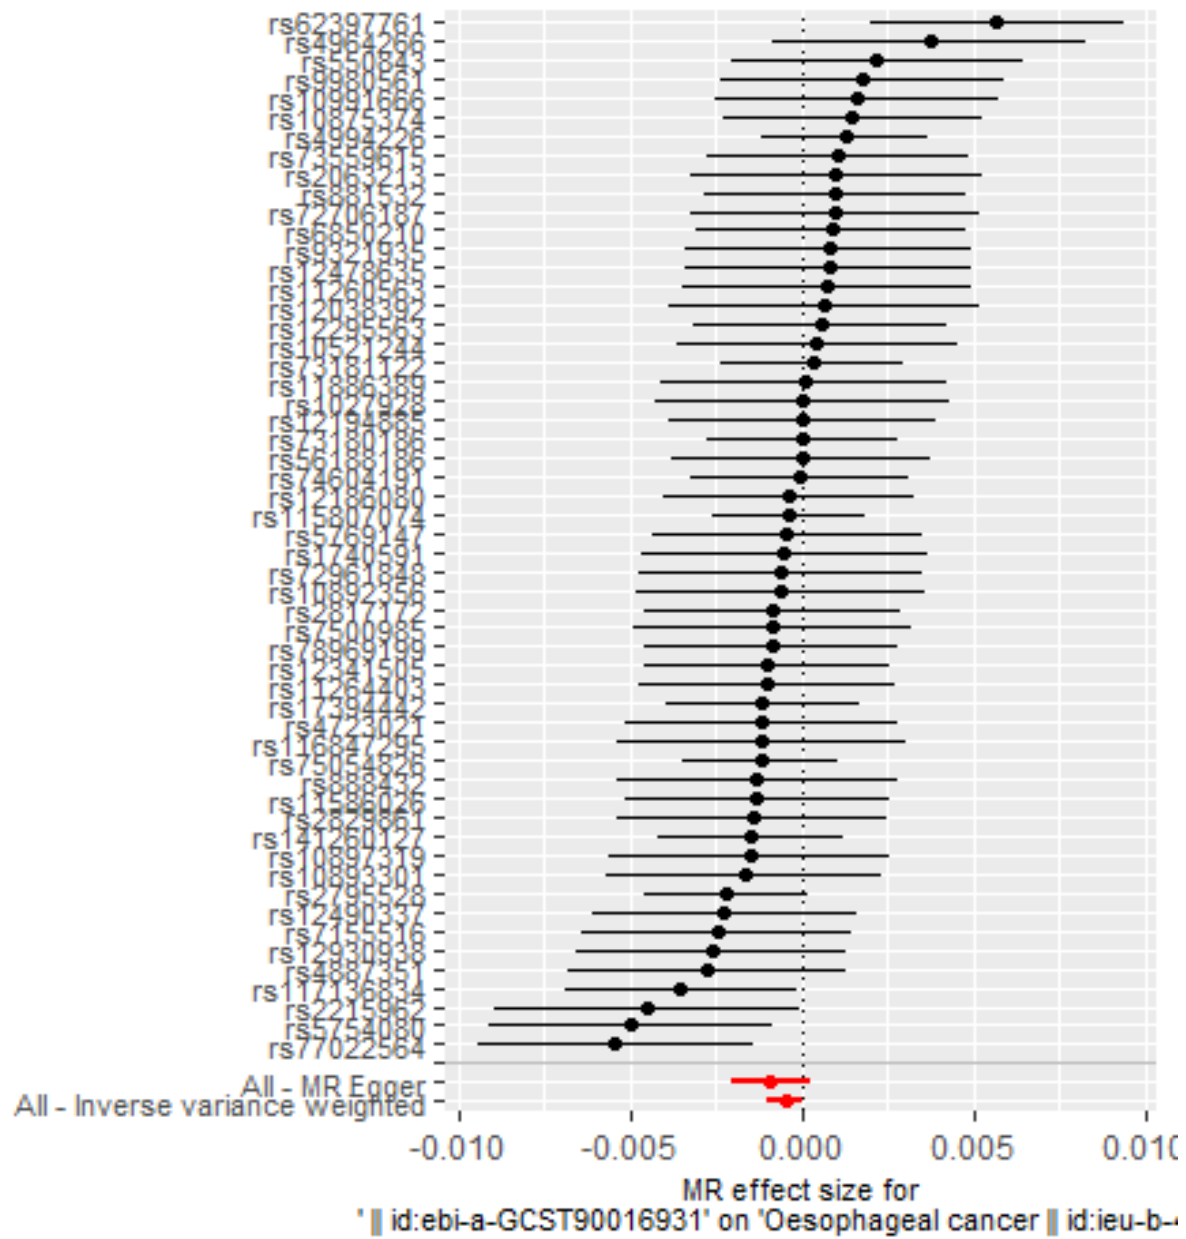

MR Test

- Inverse variance weighted
- MR Egger
- Simple mode
- Weighted median
- Weighted mode

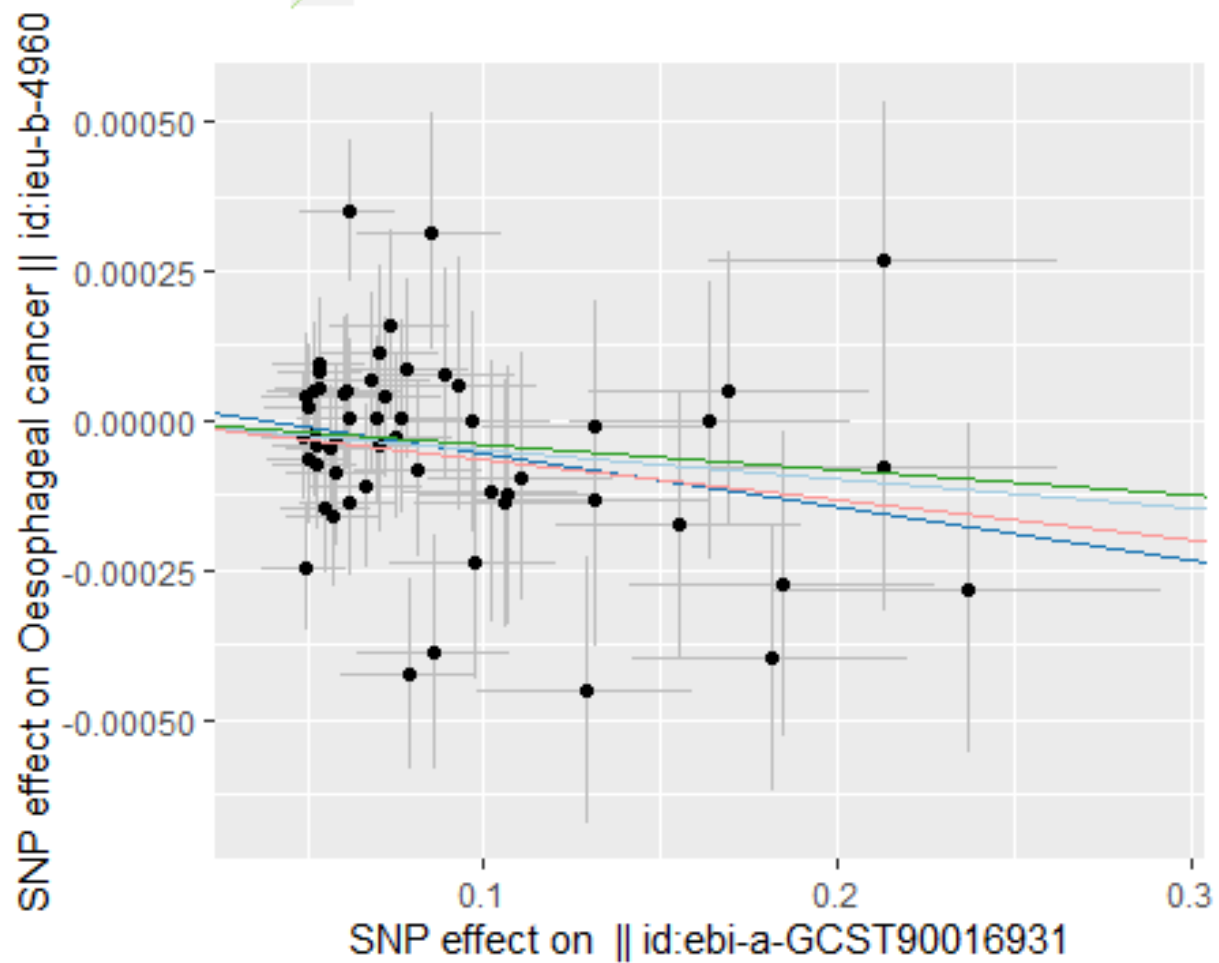



**Figure 13** Leave-one-out analysis, funnel plot, MR effect size and scatter plot for gut microbiota abundance (family Desulfovibrionaceae id.3169) on oesophageal cancer

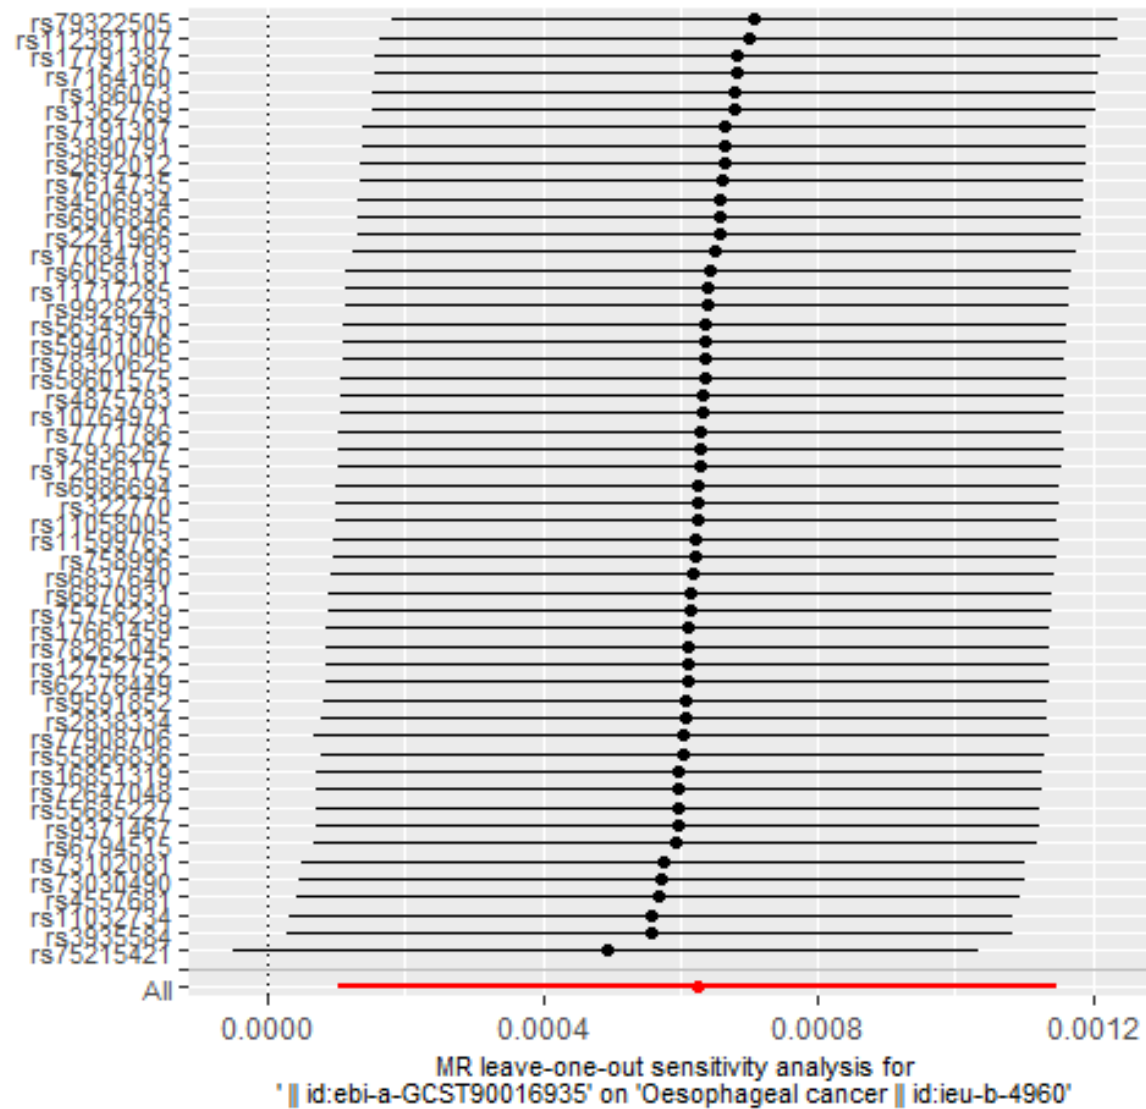





MR Test

- Inverse variance weighted
- MR Egger
- Simple mode
- Weighted median
- Weighted mode

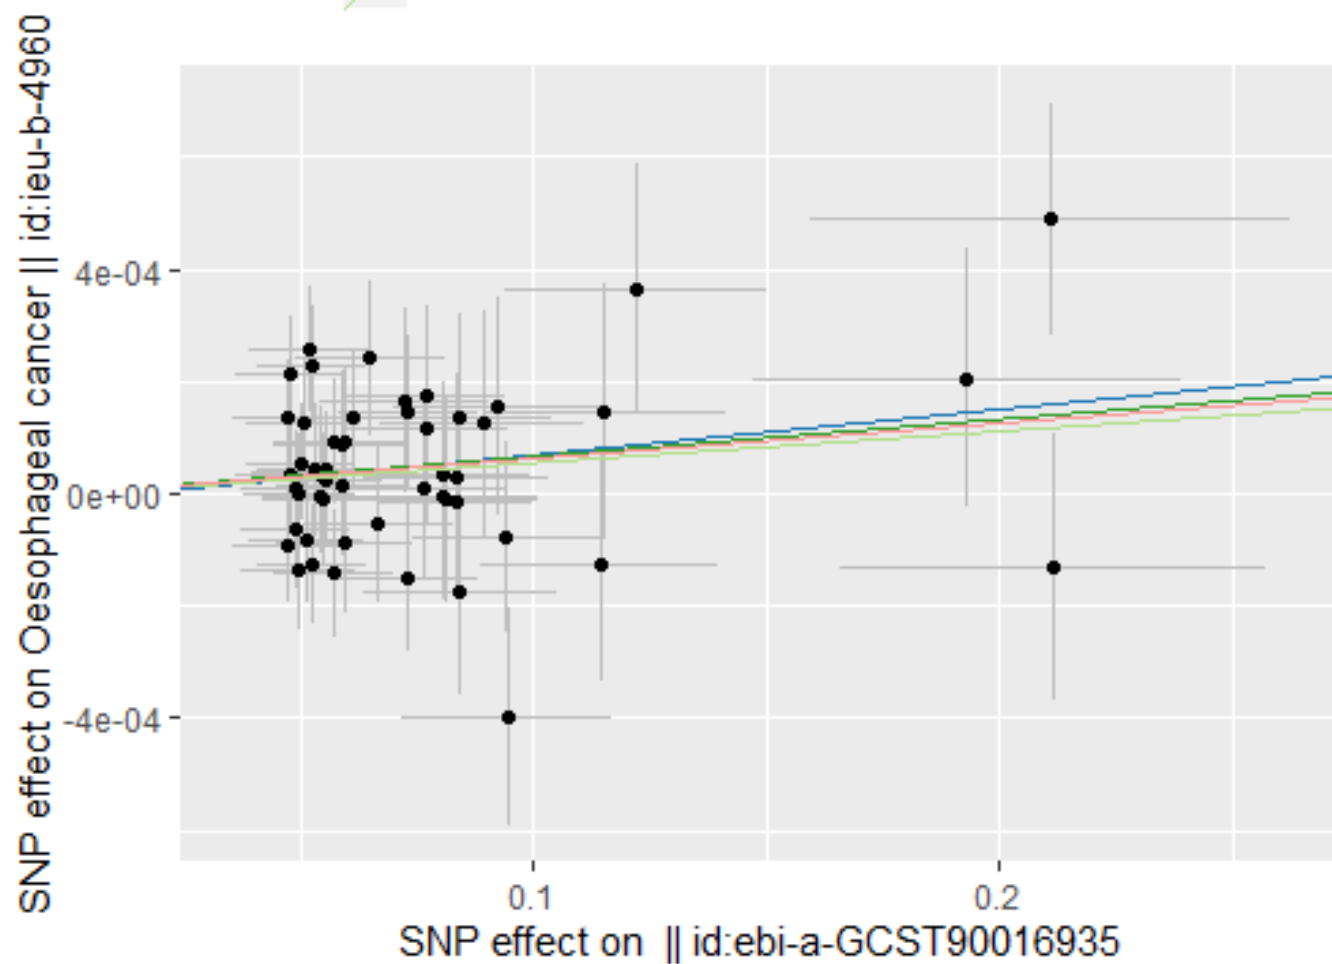

**Figure 14** Leave-one-out analysis, funnel plot, MR effect size and scatter plot for gut microbiota abundance (family Pasteurellaceae id.3689) on oesophageal cancer

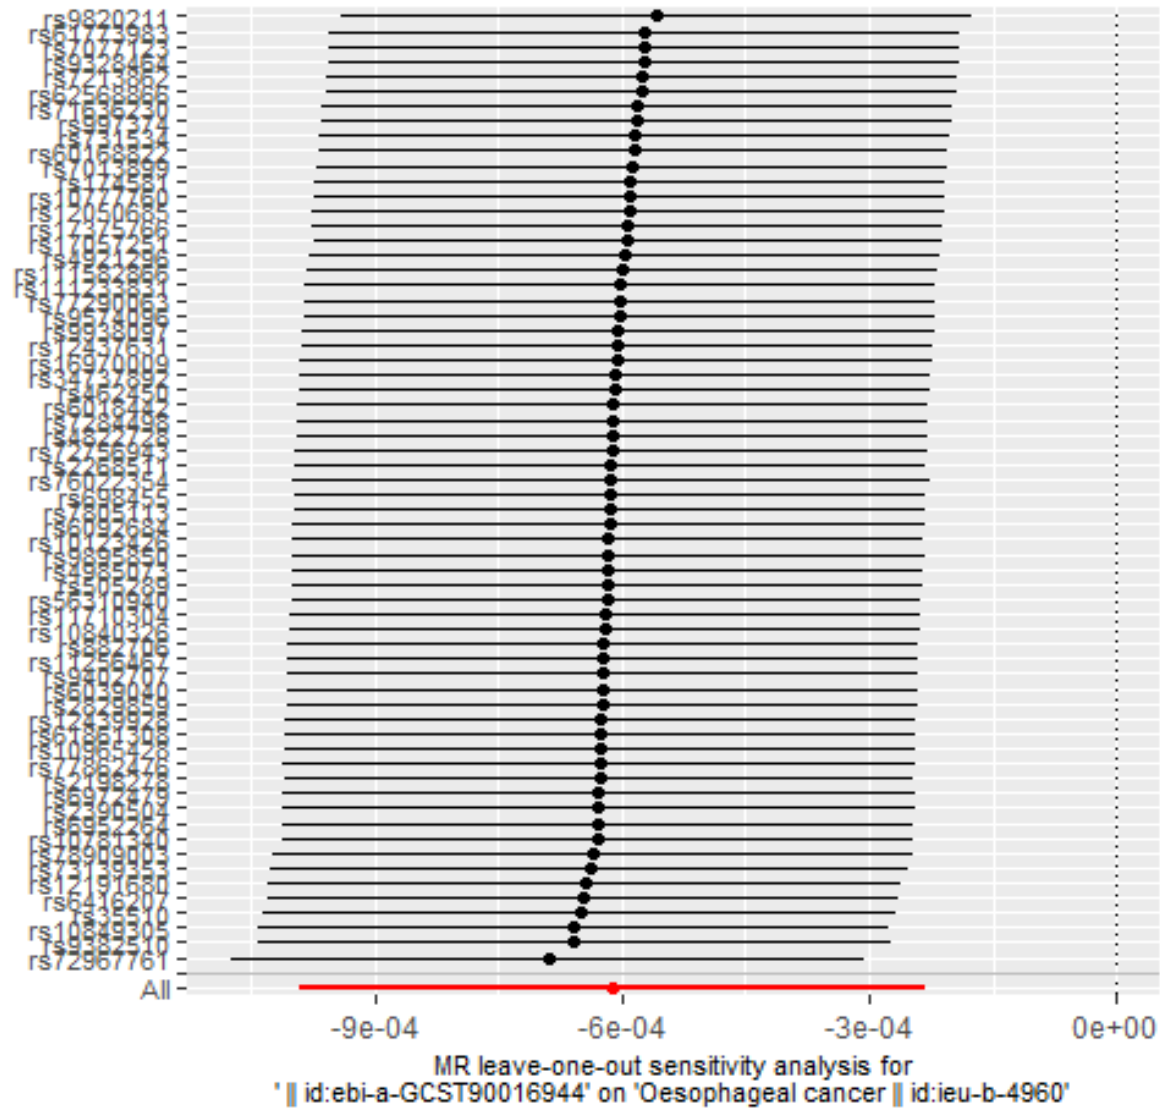

MR Method

- Inverse variance weighted
- MR Egger

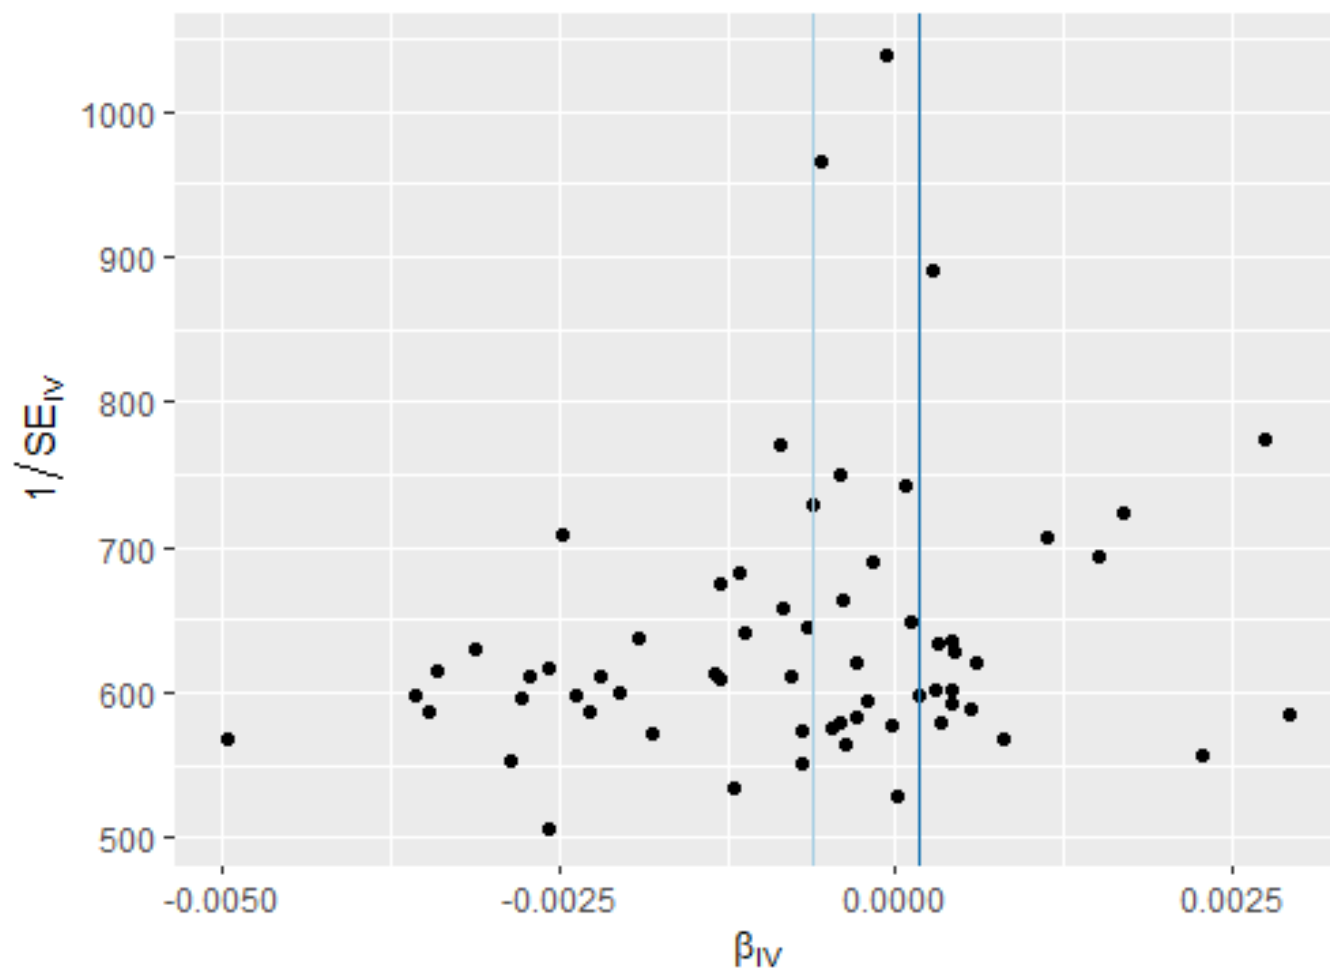

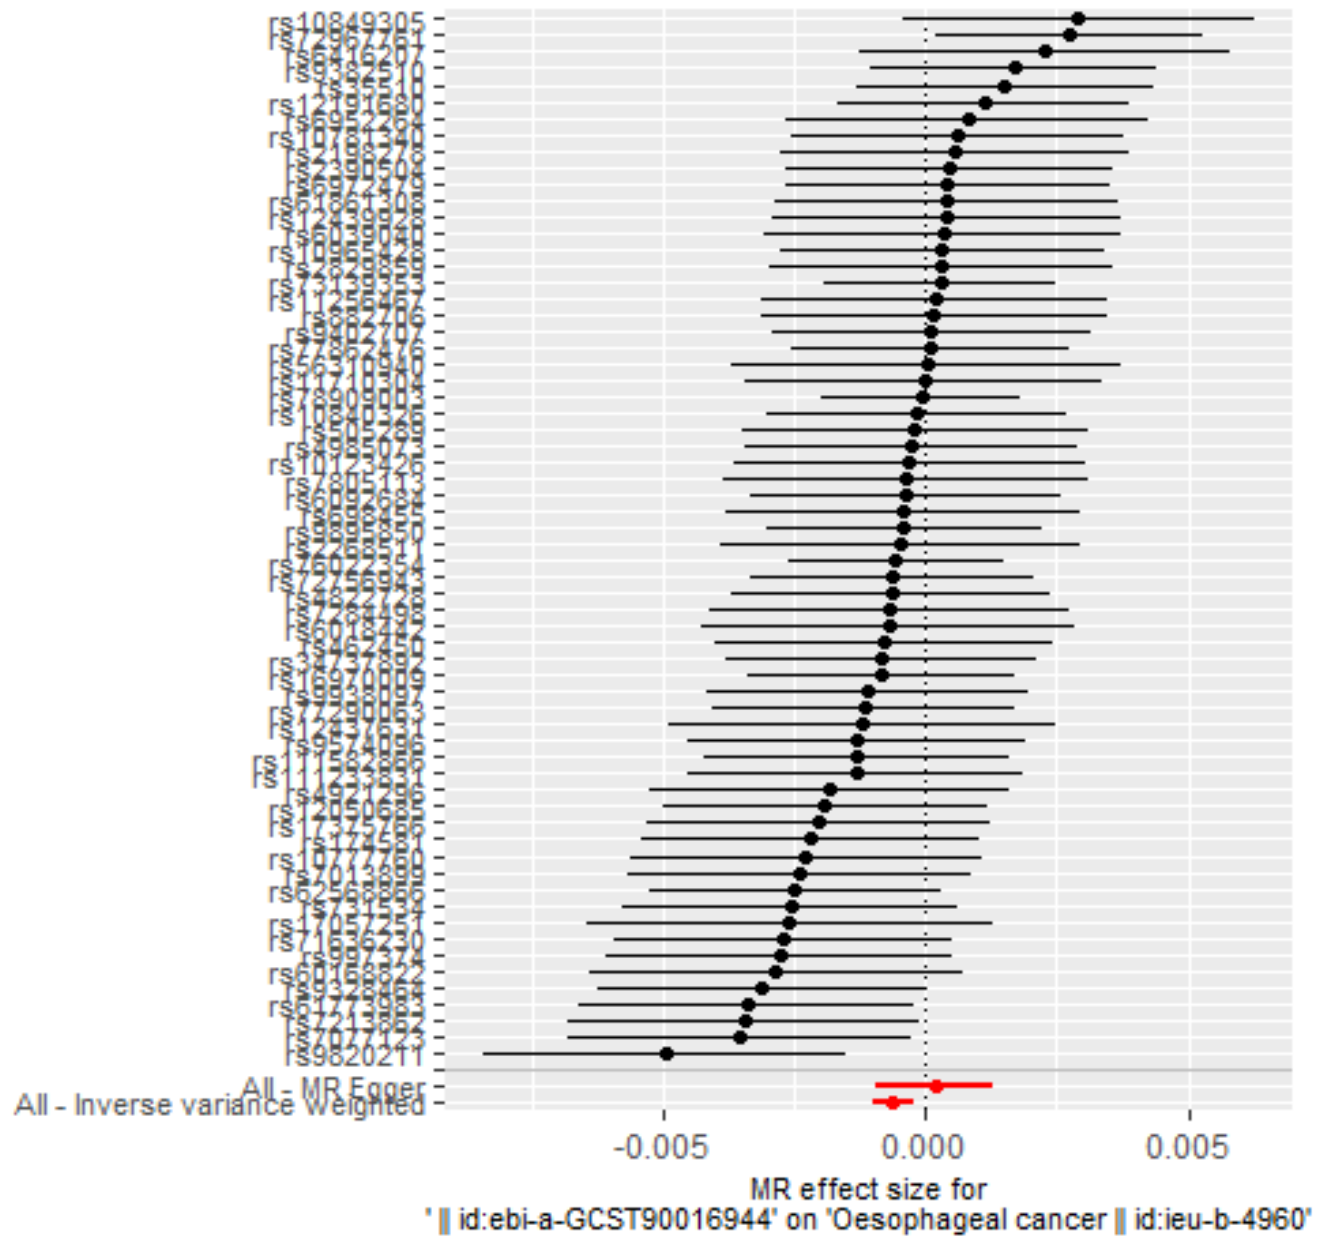

MR Test

- Inverse variance weighted
- MR Egger
- Simple mode
- Weighted median
- Weighted mode

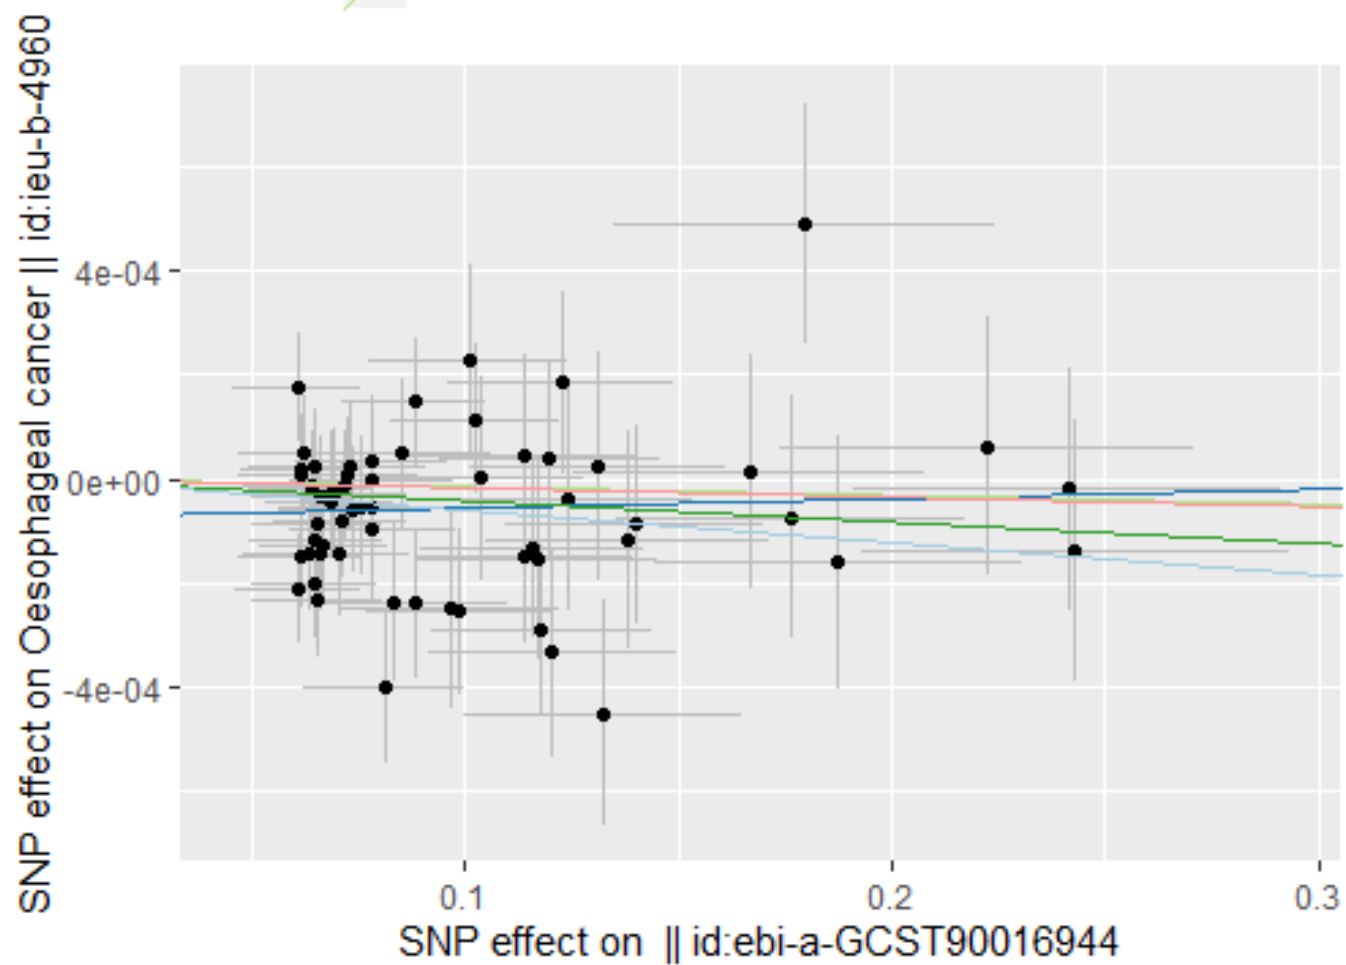



**Figure 15** Leave-one-out analysis, funnel plot, MR effect size and scatter plot for gut microbiota abundance (family Ruminococcaceae id.2050) on oesophageal cancer

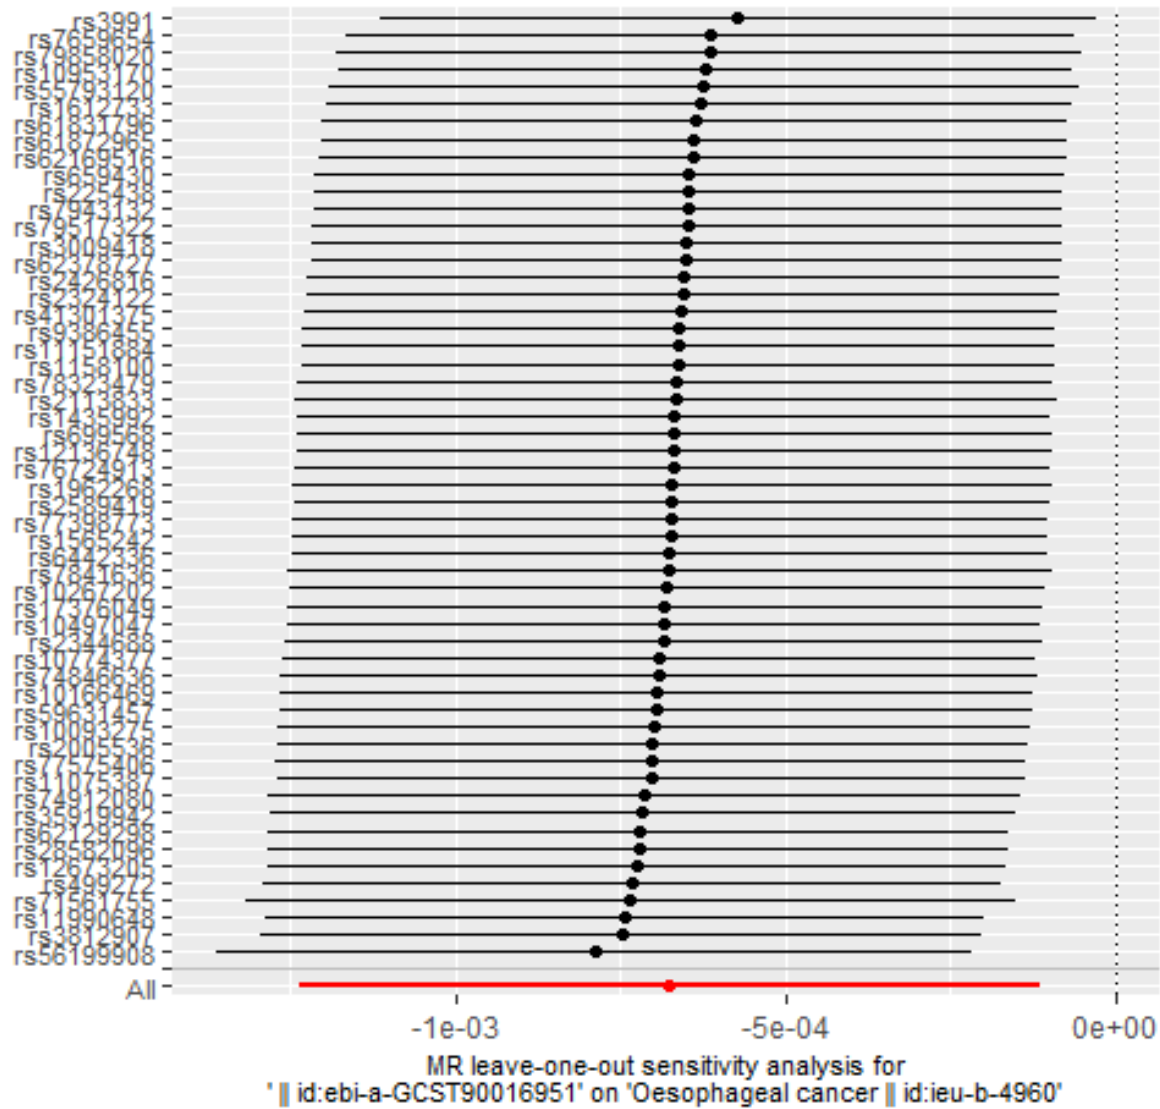

### MR Method

- Inverse variance weighted
- MR Egger

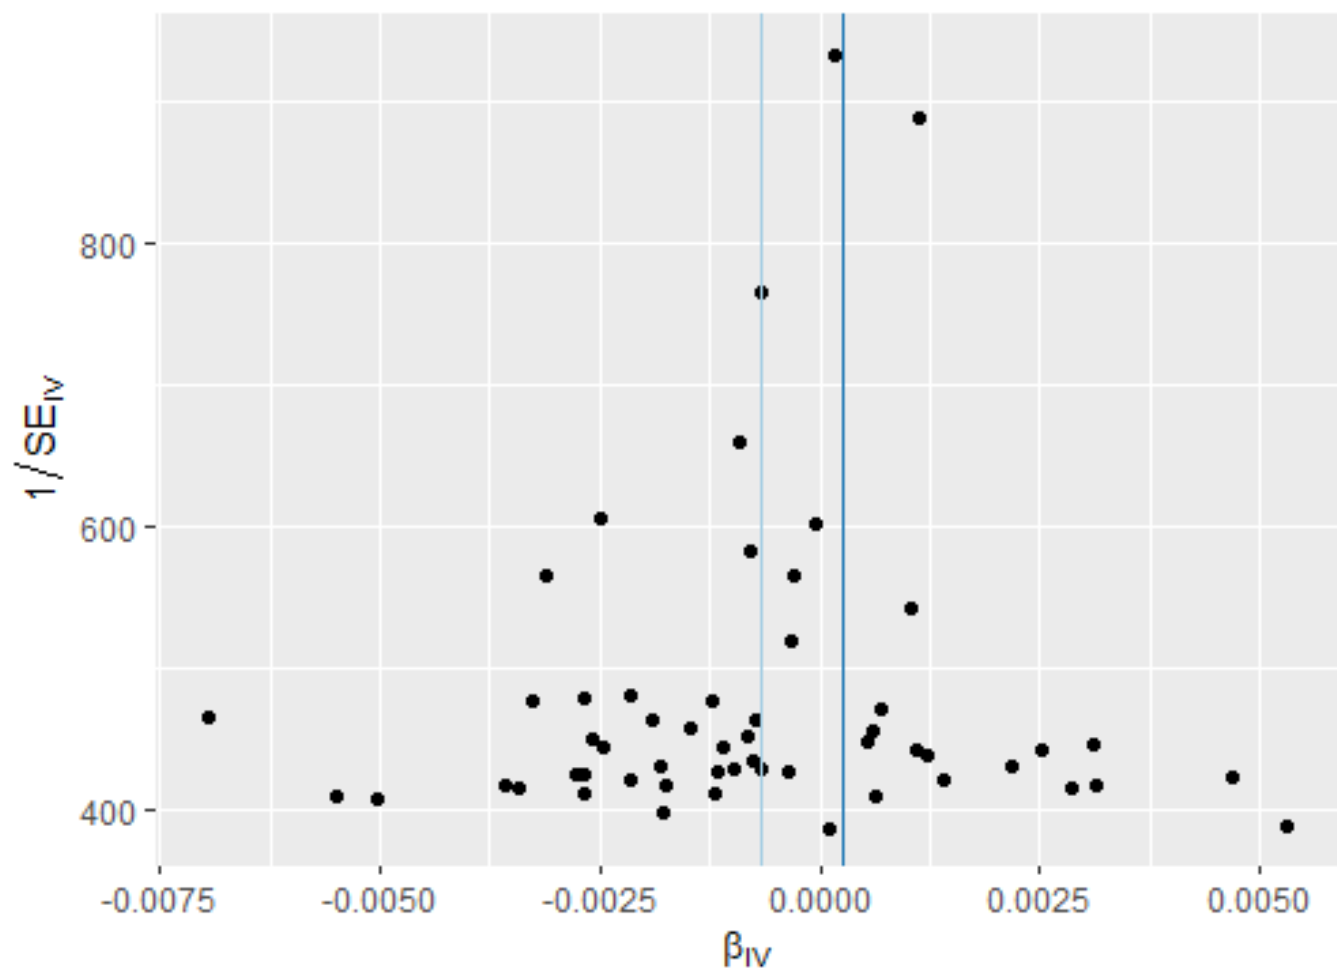



MR Test

- Inverse variance weighted
- MR Egger
- Simple mode
- Weighted median
- Weighted mode

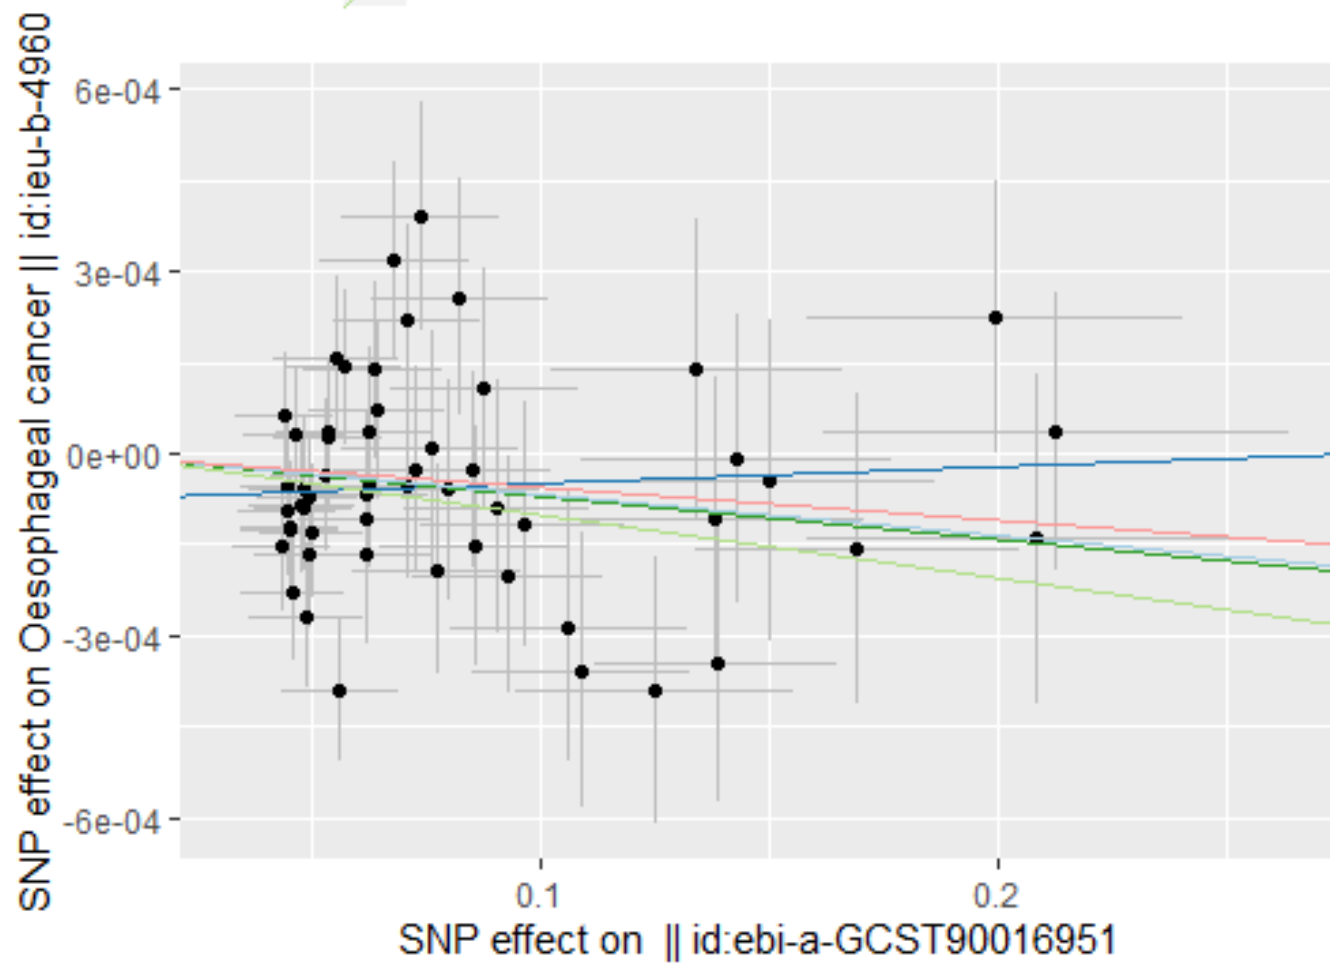

**Figure 16** Leave-one-out analysis, funnel plot, MR effect size and scatter plot for gut microbiota abundance (genus Eisenbergiella id.11304) on oesophageal cancer

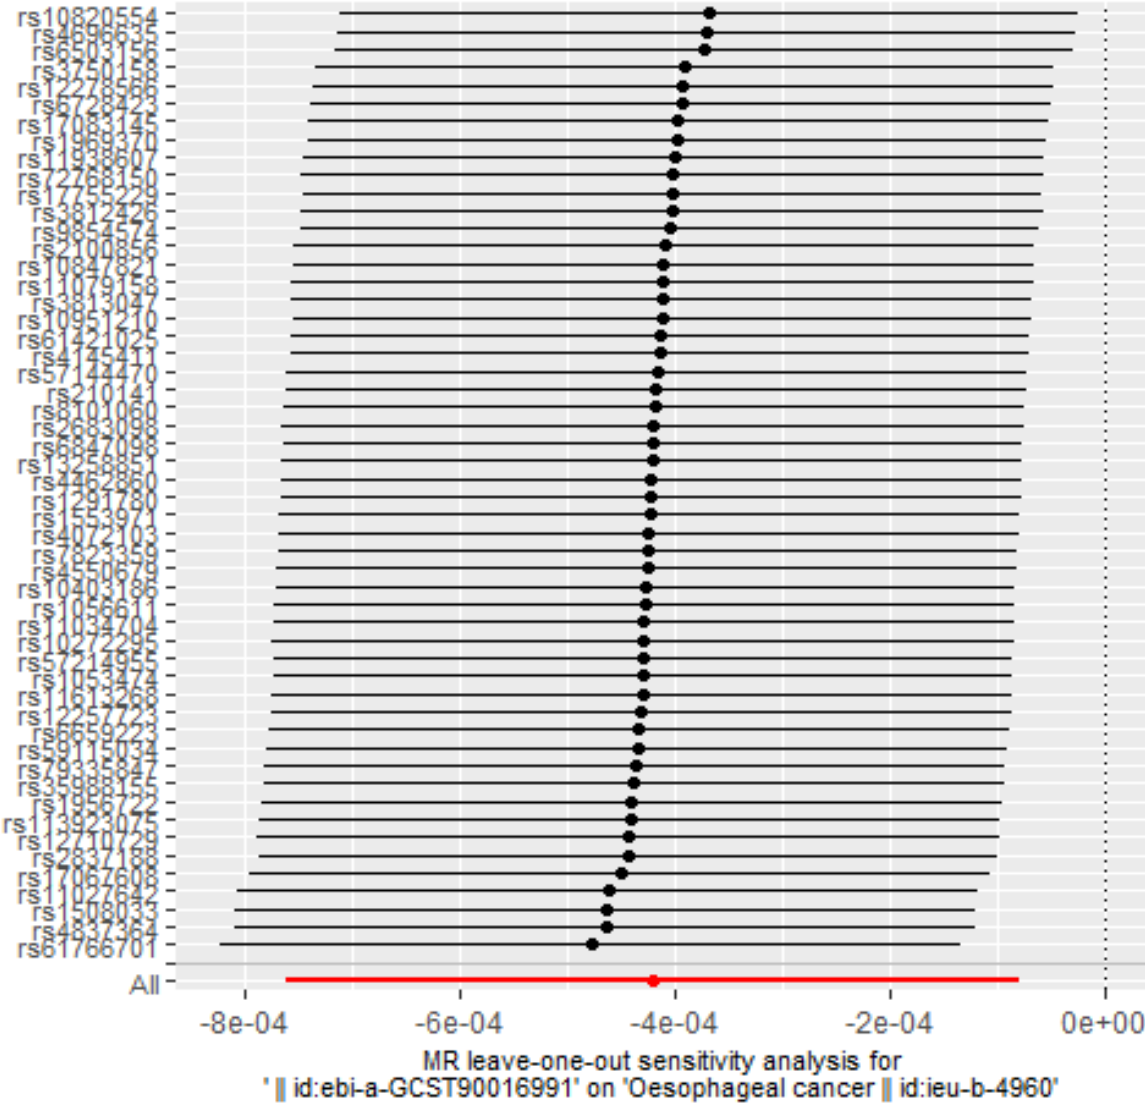

MR Method

- Inverse variance weighted
- MR Egger

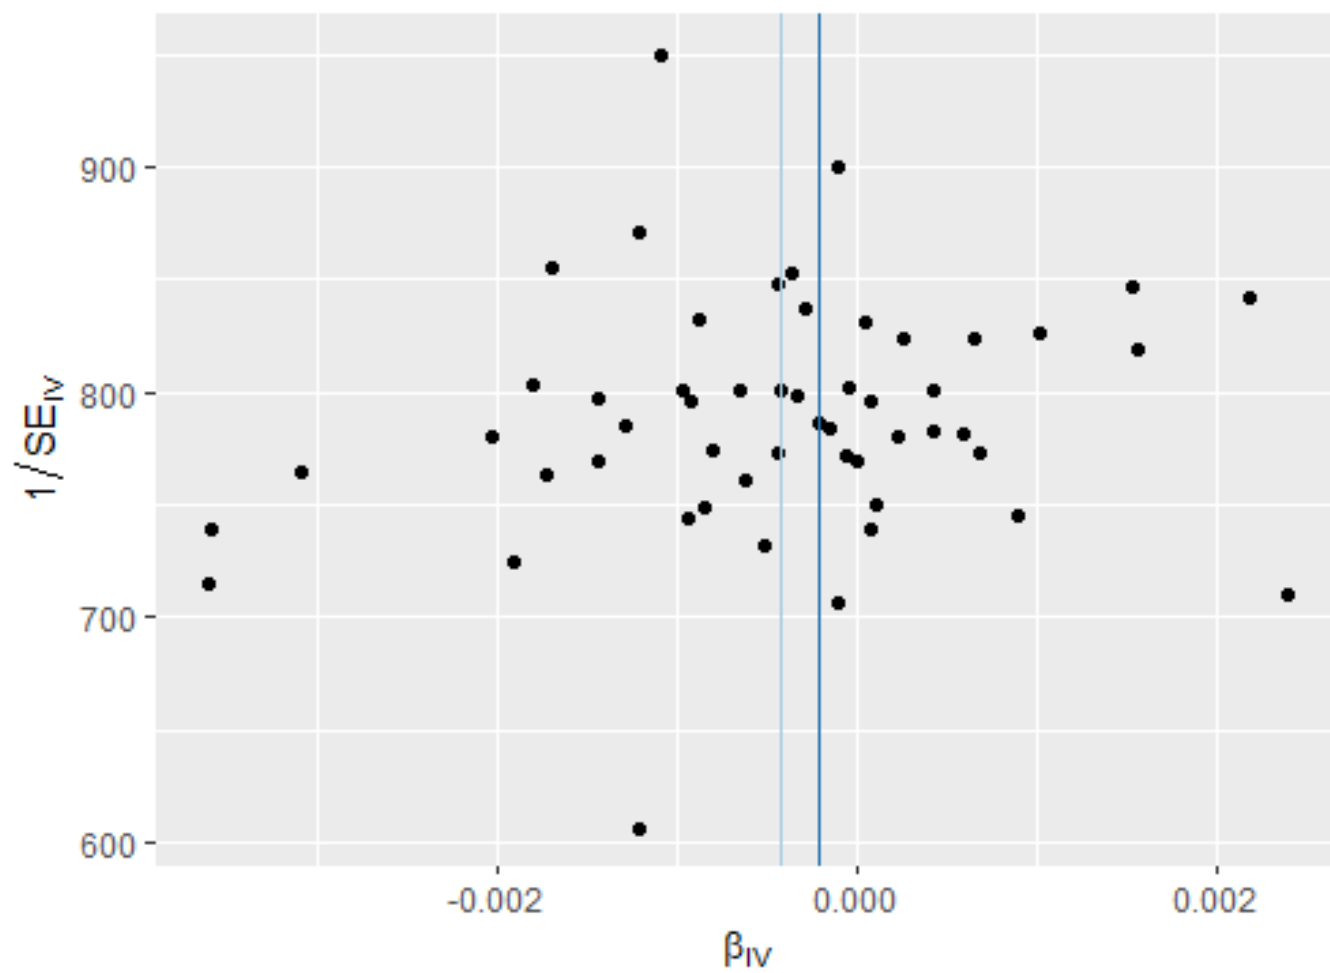

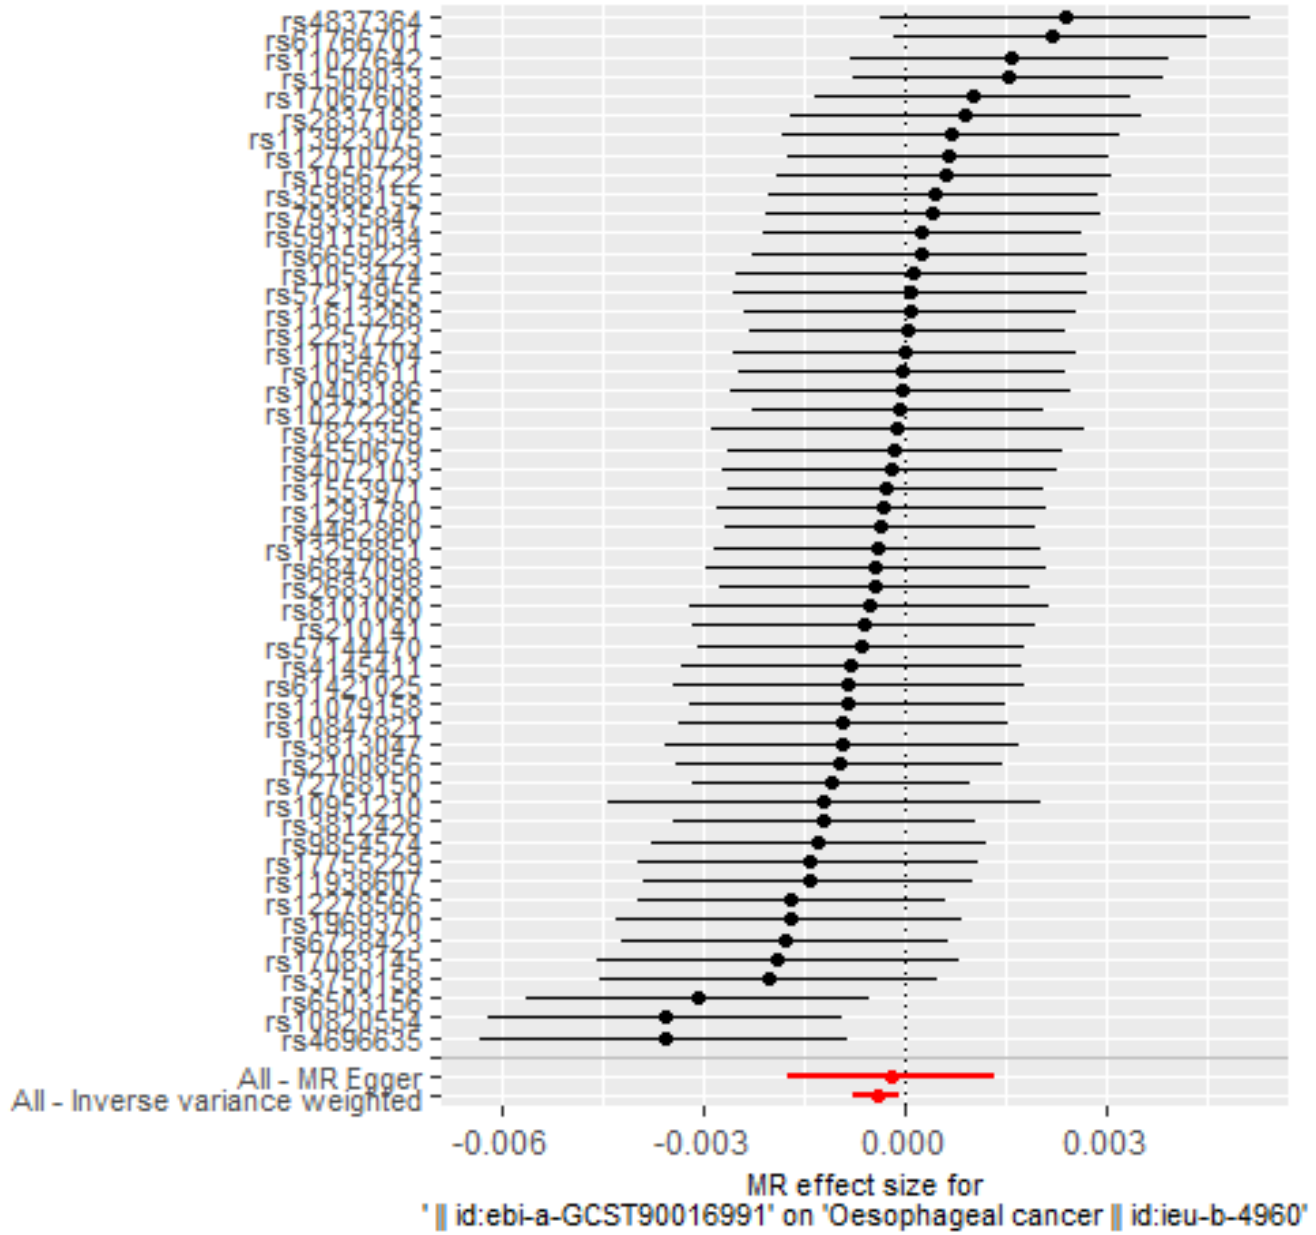

MR Test

- Inverse variance weighted
- MR Egger
- Simple mode
- Weighted median
- Weighted mode

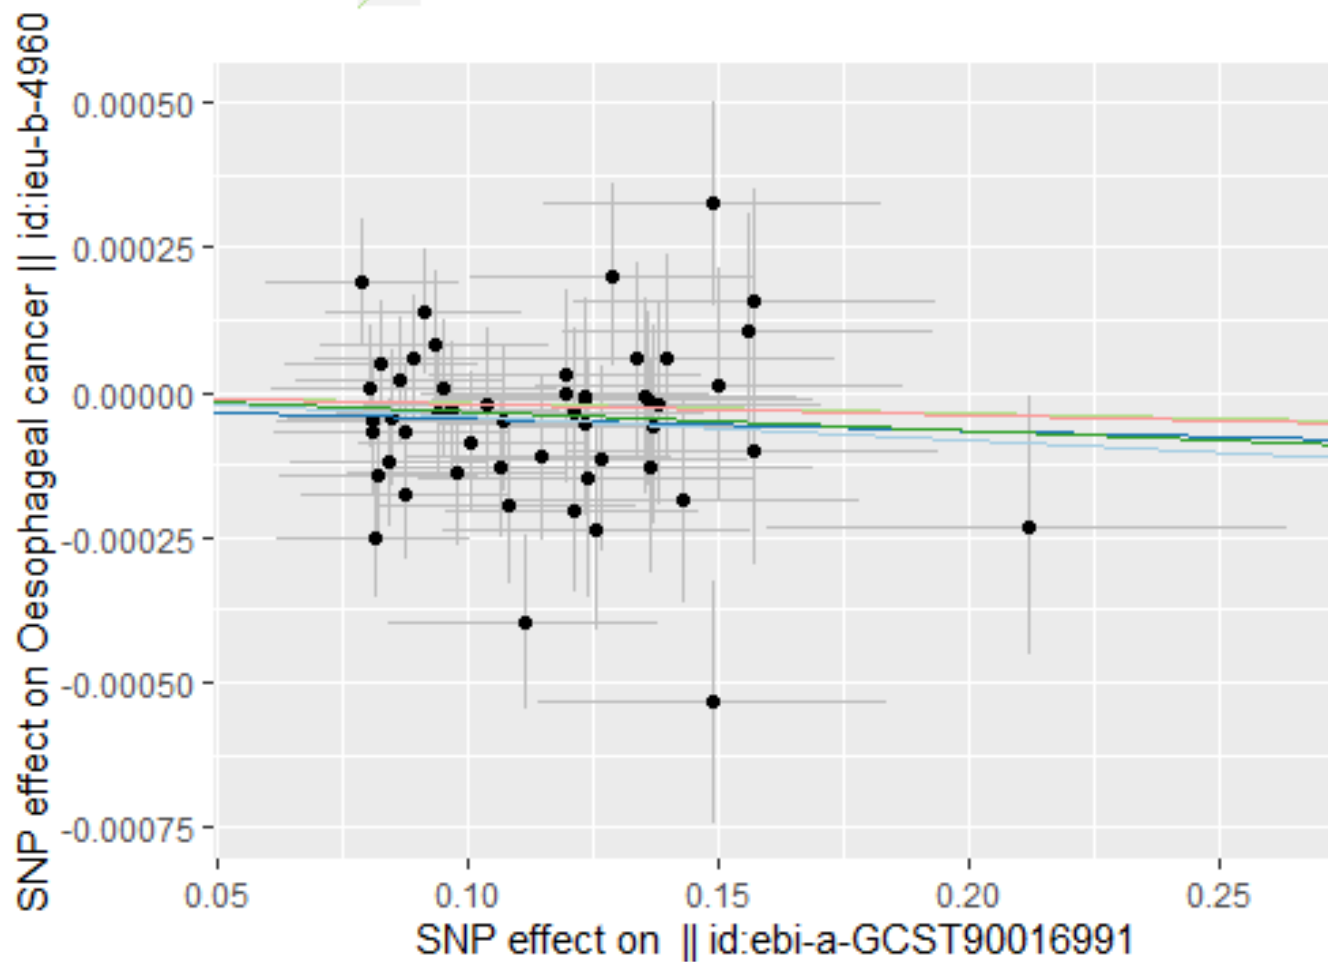



**Figure 17** Leave-one-out analysis, funnel plot, MR effect size and scatter plot for gut microbiota abundance (genus Oxalobacter id.2978) on oesophageal cancer

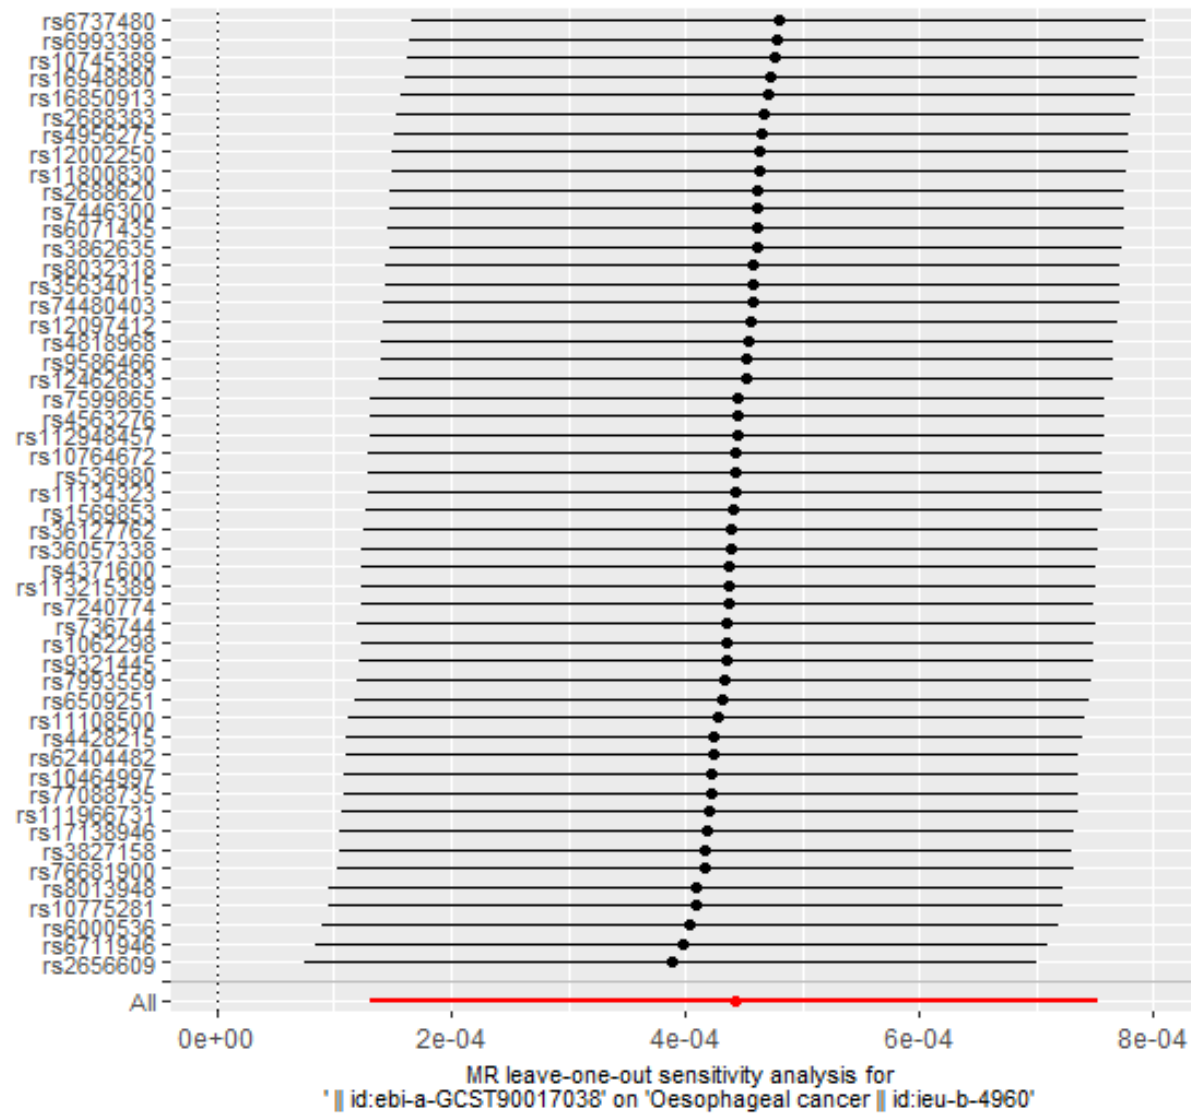

MR Method

- Inverse variance weighted
- MR Egger

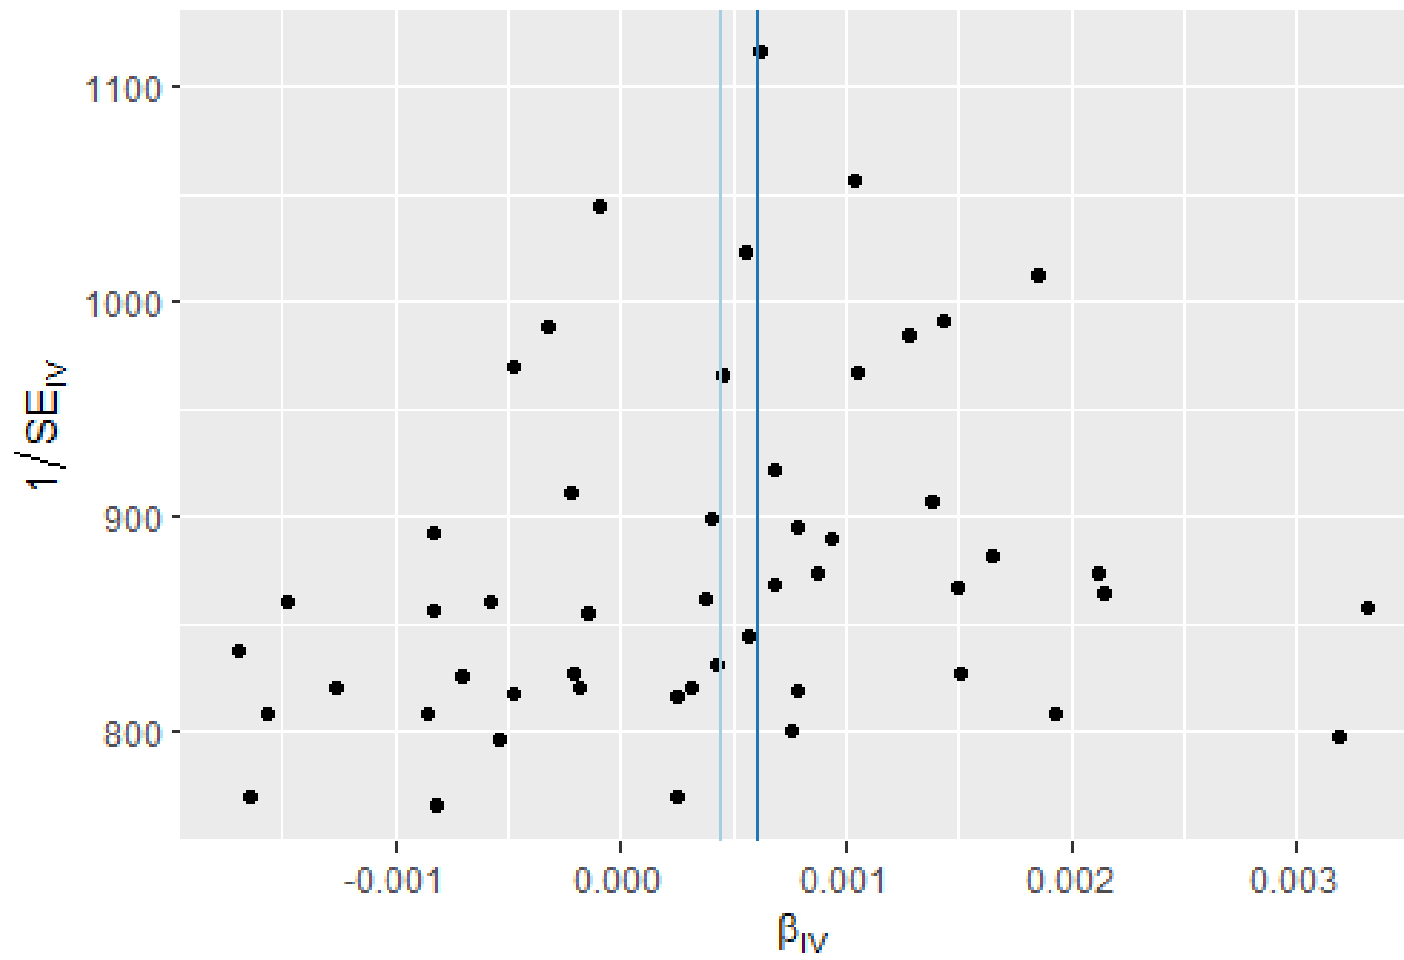

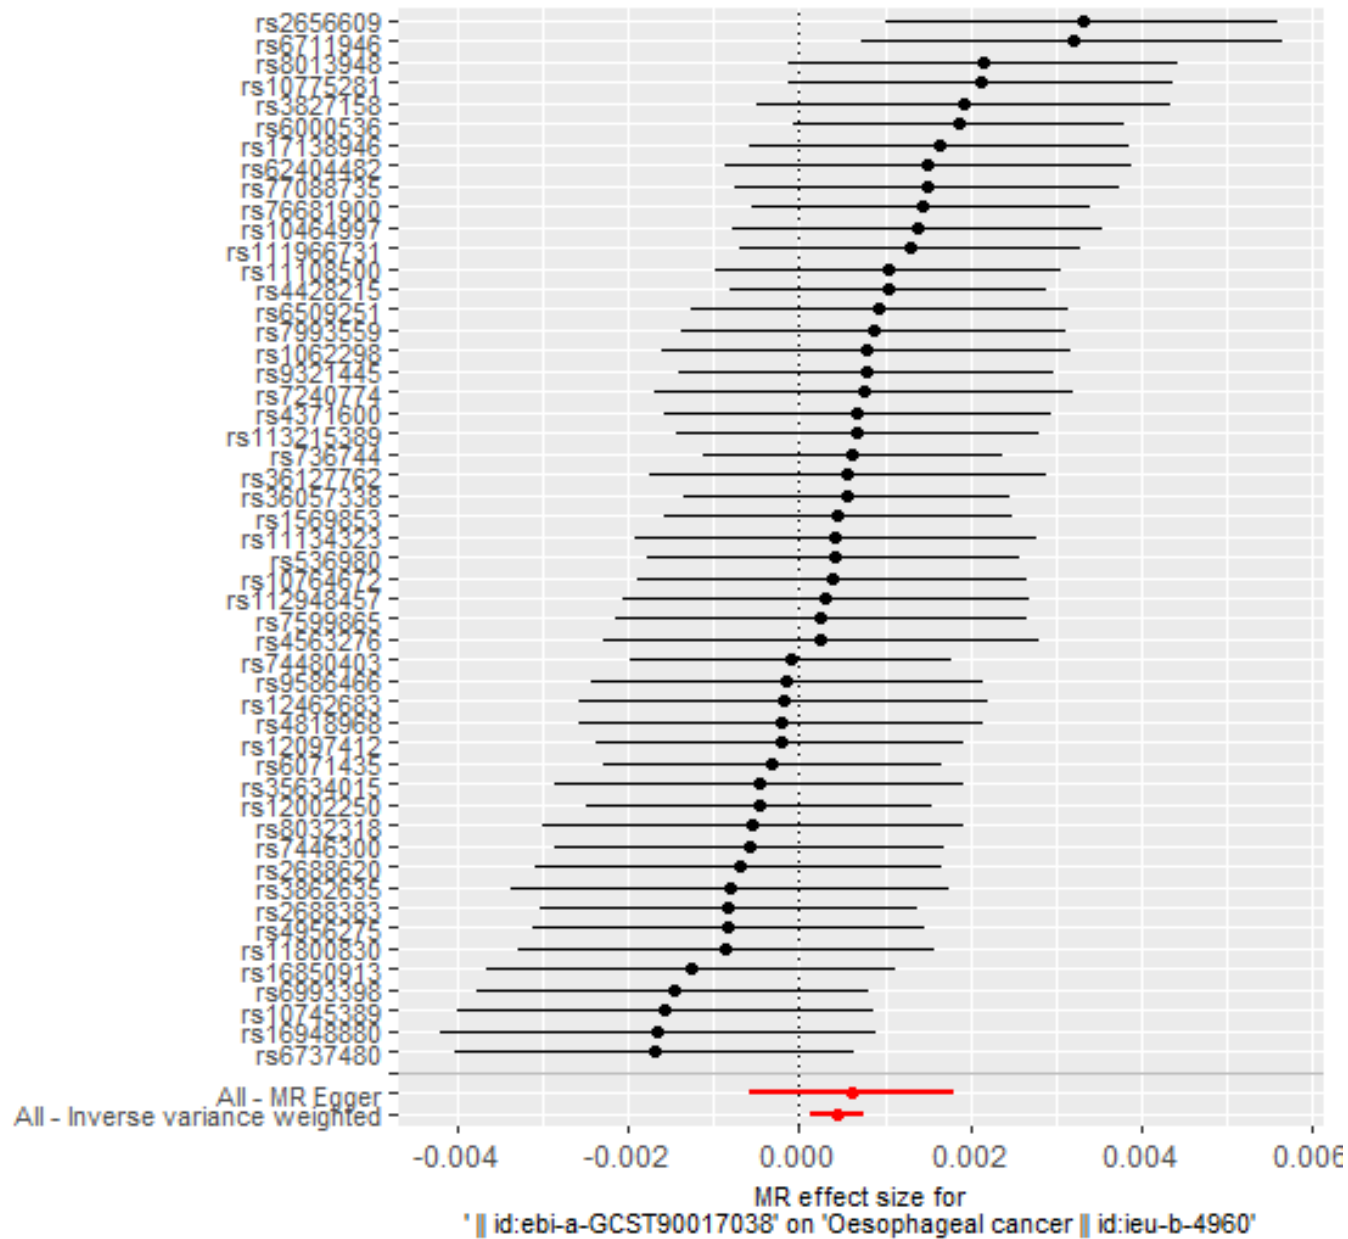

MR Test

- Inverse variance weighted
- MR Egger
- Simple mode
- Weighted median
- Weighted mode

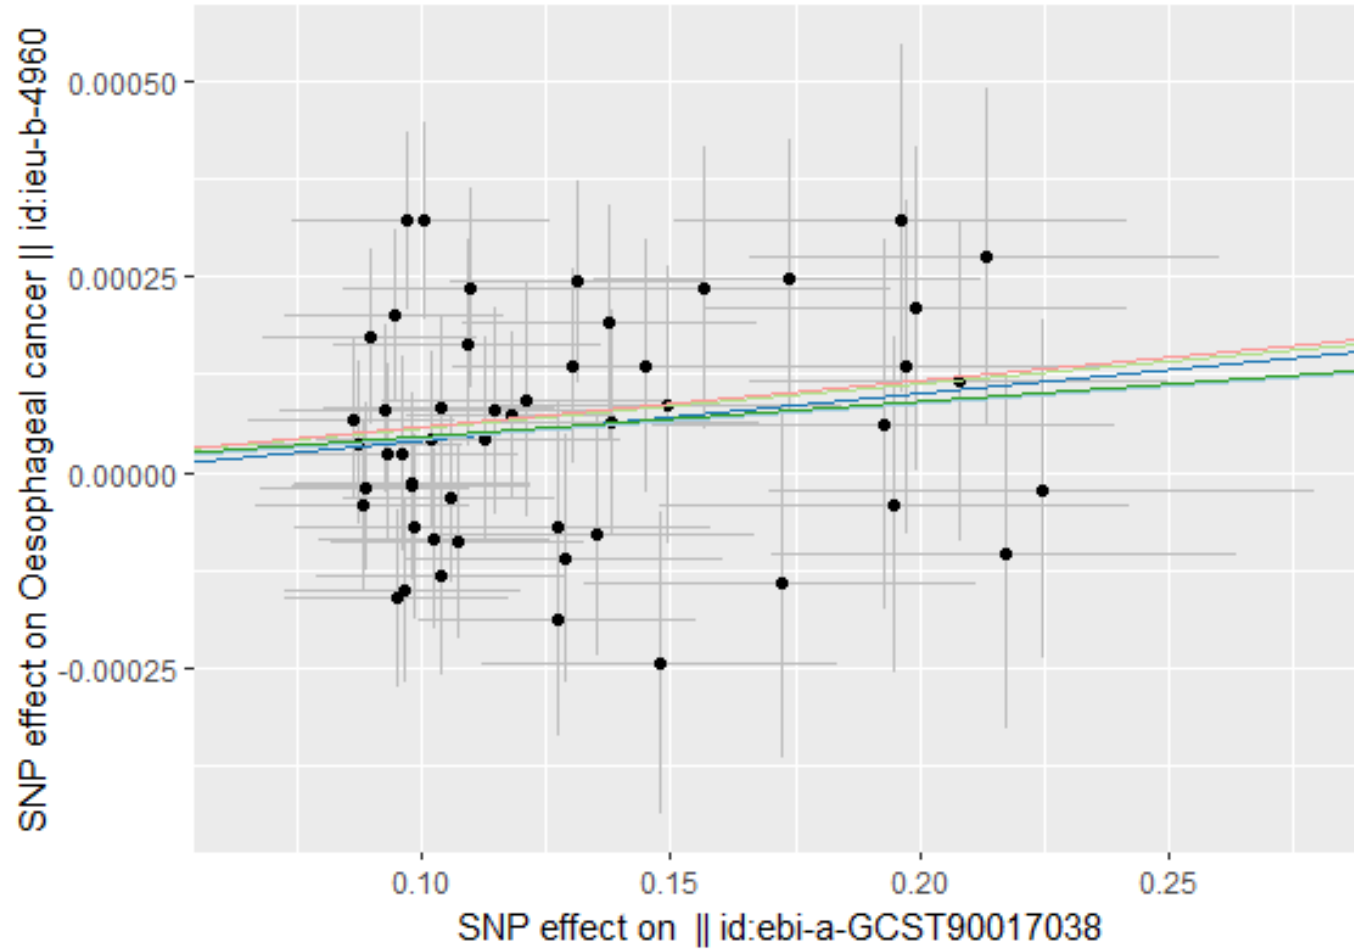

**Figure 18** Leave-one-out analysis, funnel plot, MR effect size and scatter plot for gut microbiota abundance (genus Prevotella9 id.11183) on oesophageal cancer

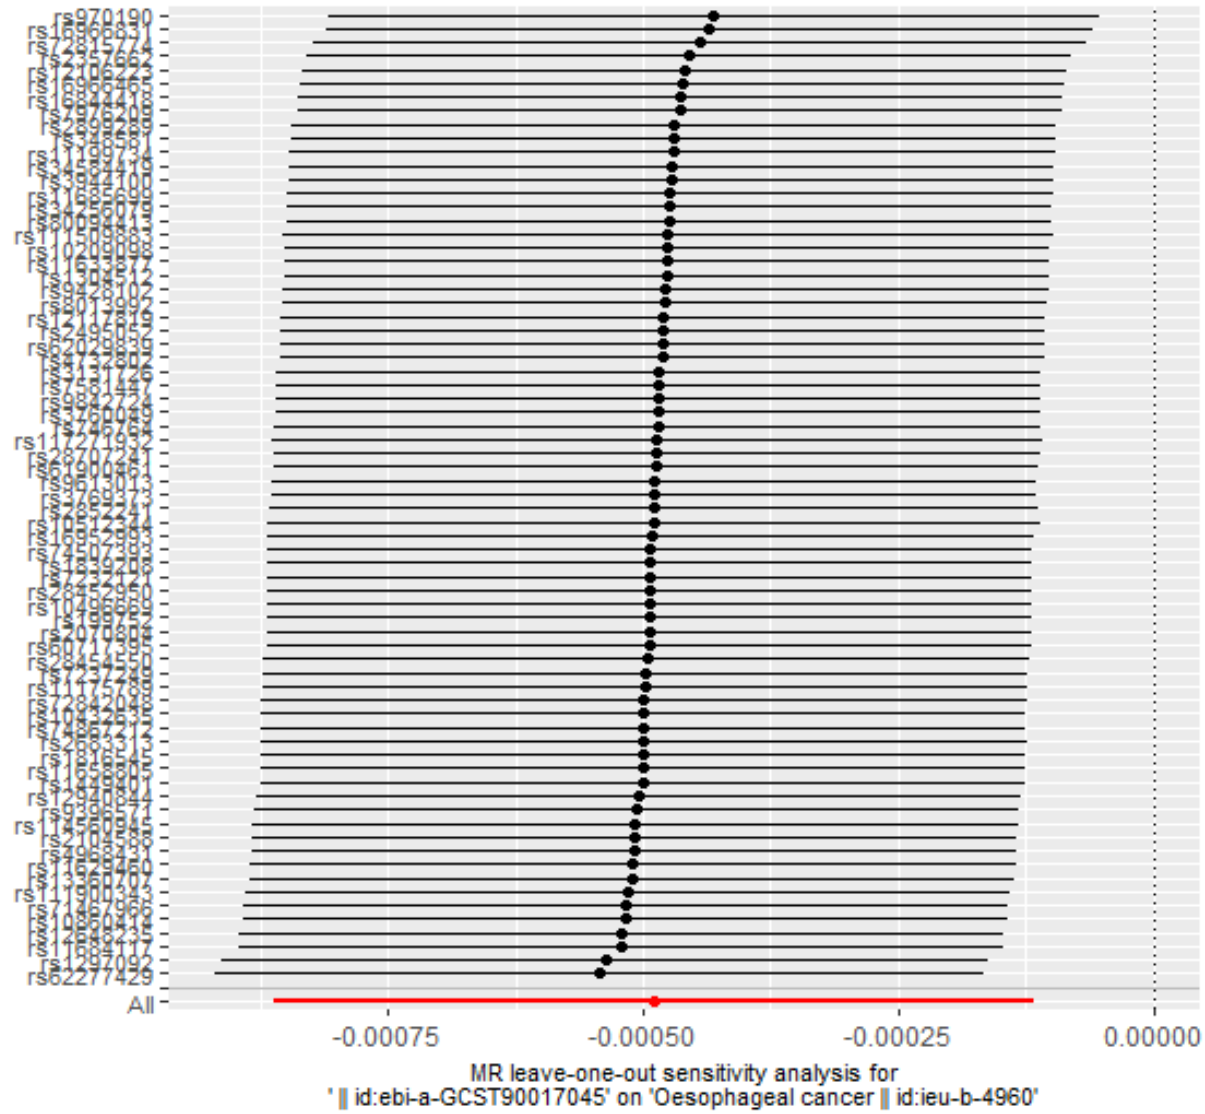

MR Method

- Inverse variance weighted
- MR Egger

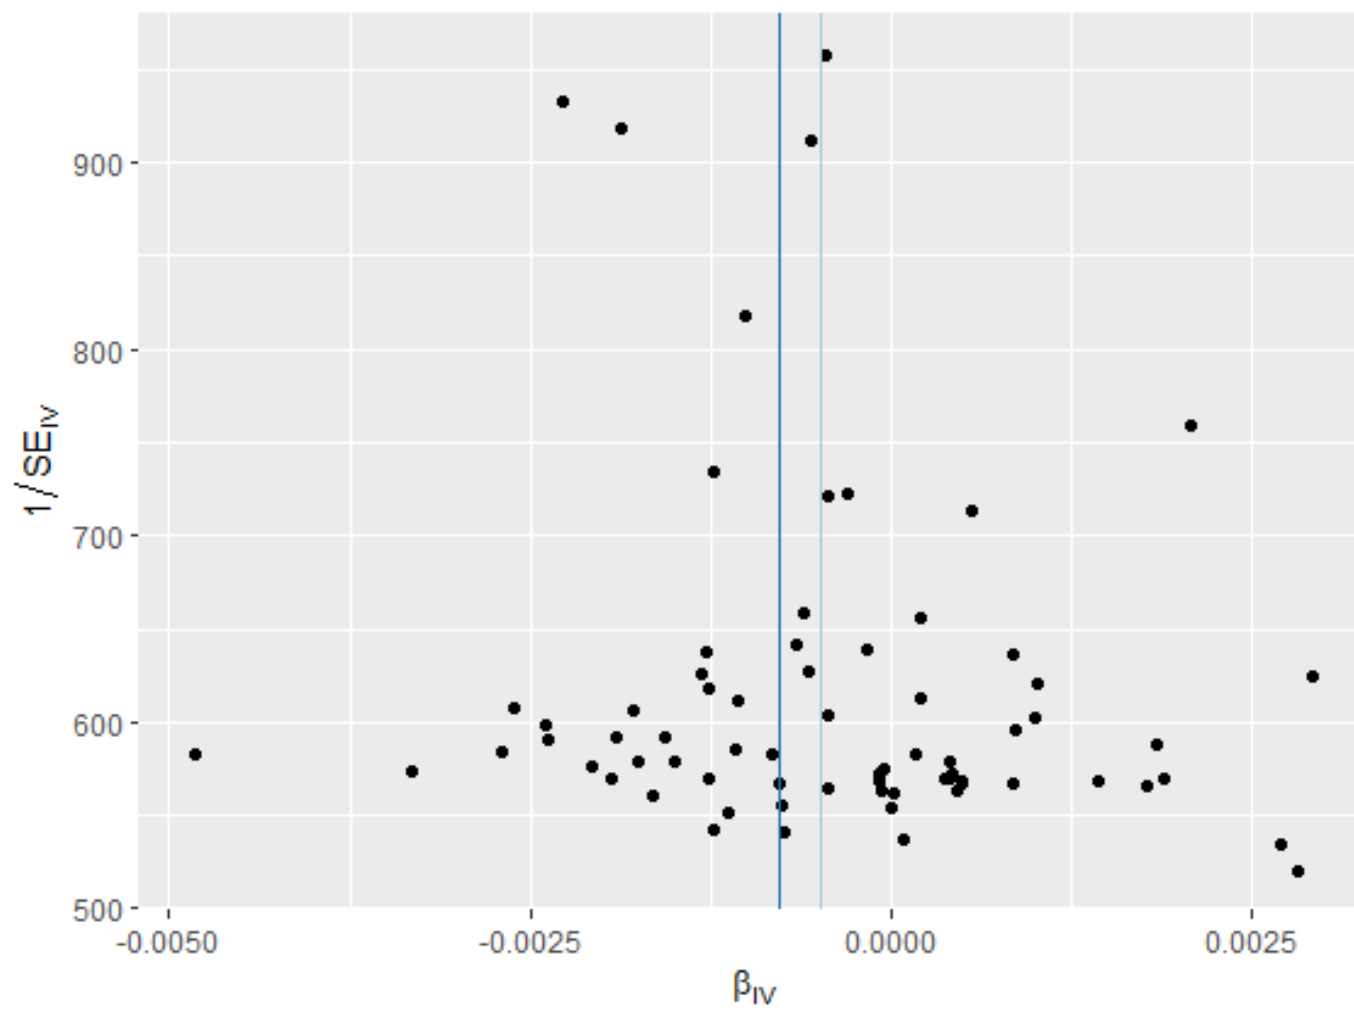

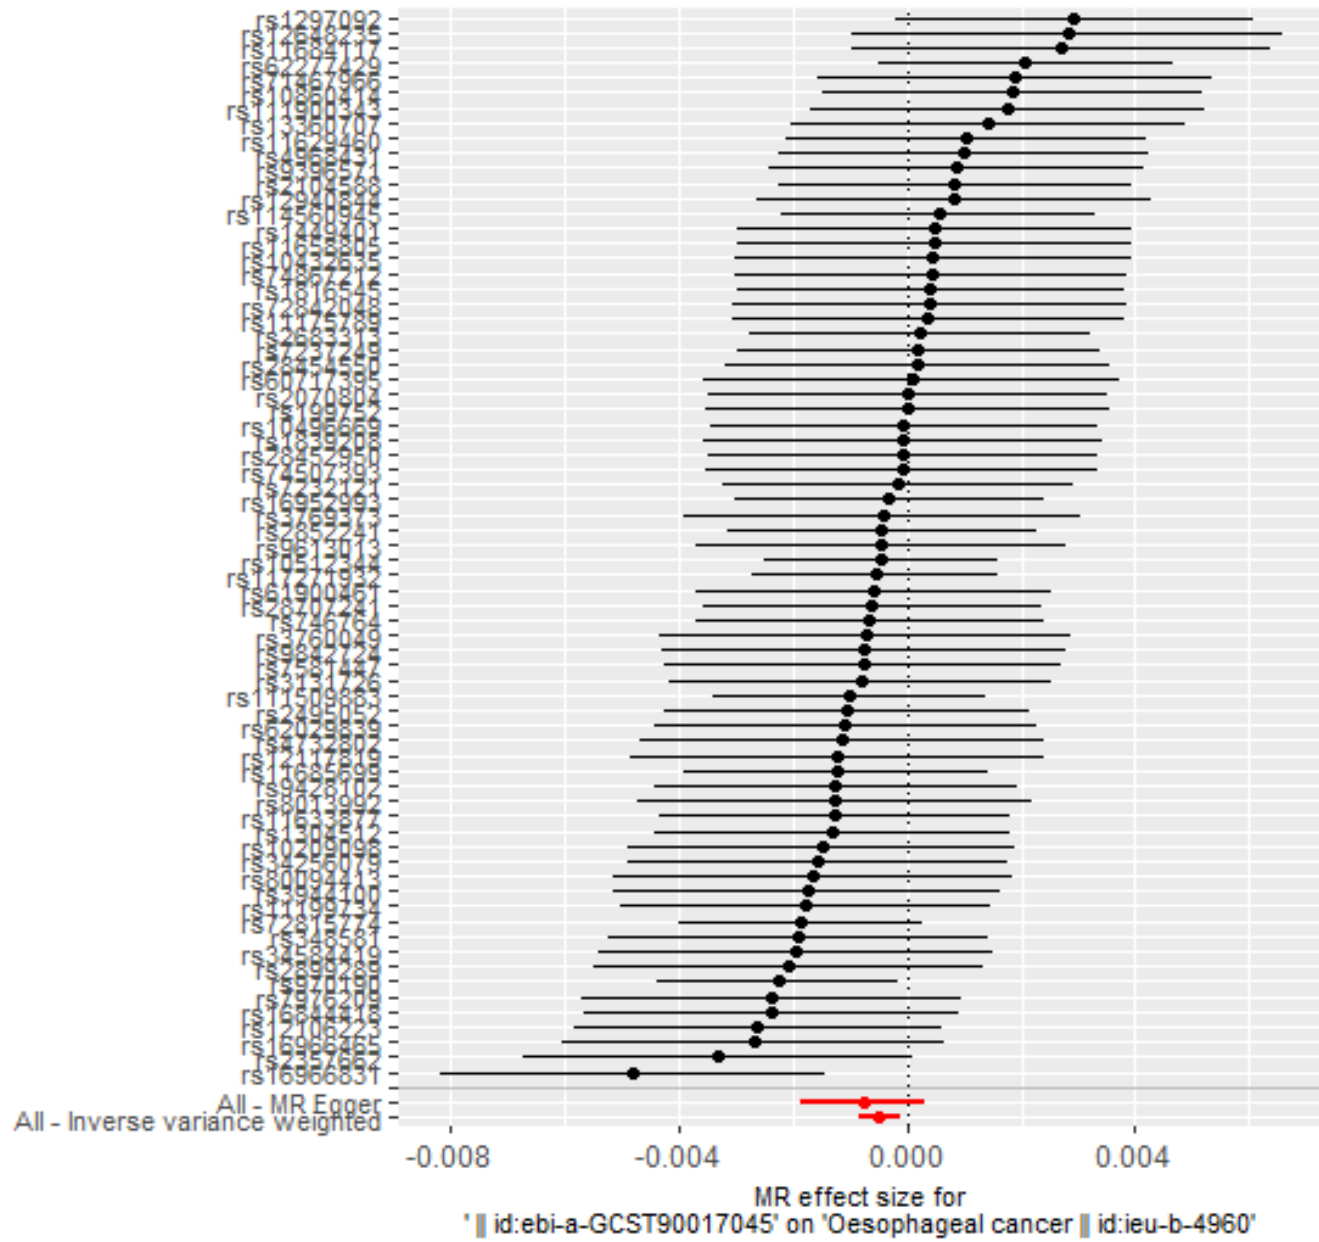

### MR Test

- Inverse variance weighted
- MR Egger
- Simple mode
- Weighted median
- Weighted mode

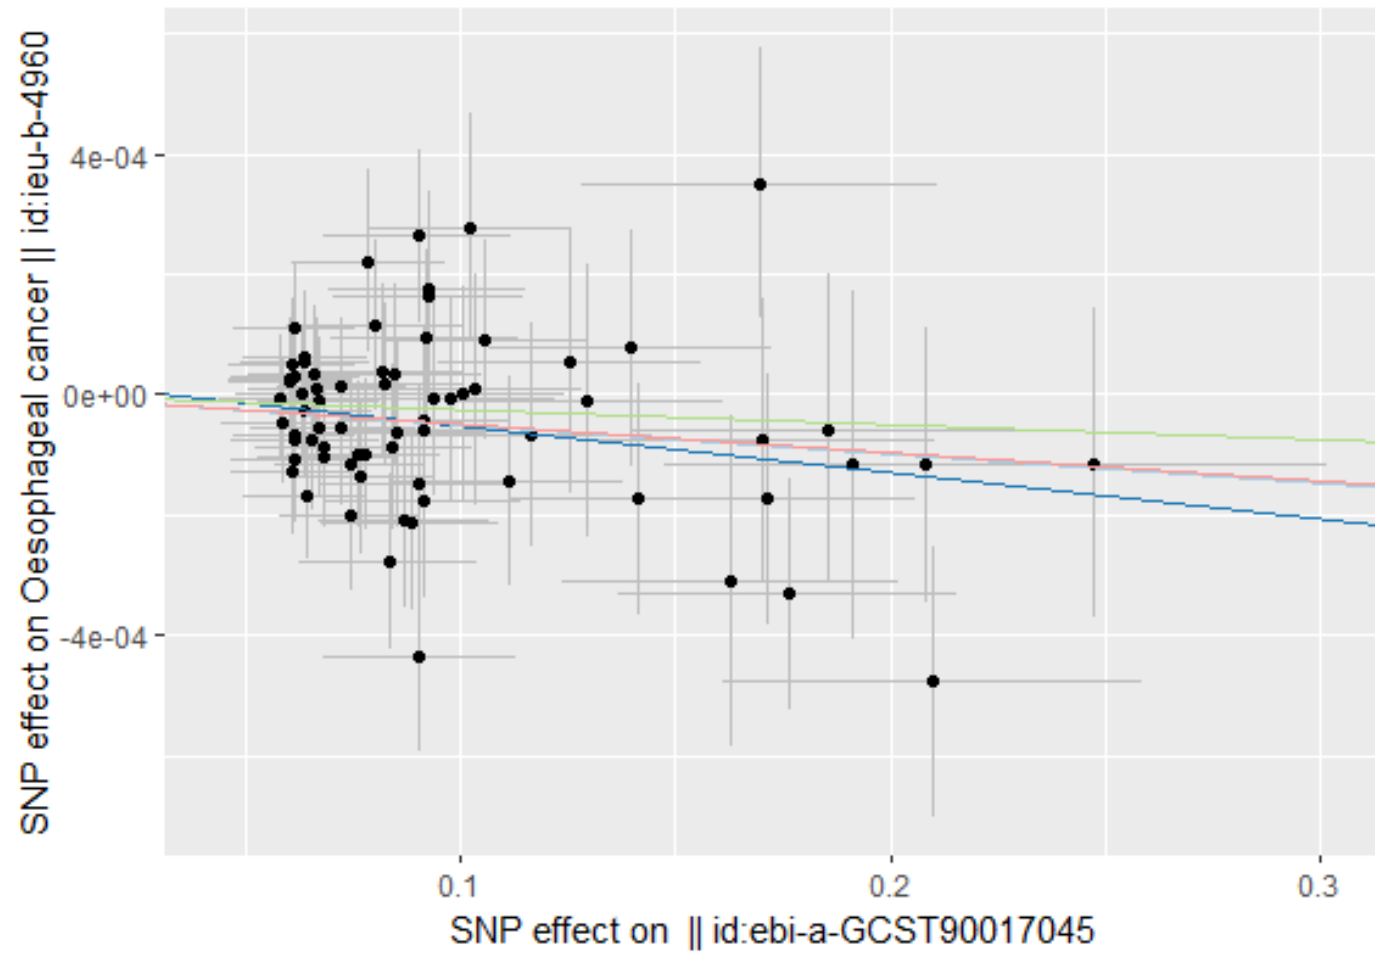



**Figure 19** Leave-one-out analysis, funnel plot, MR effect size and scatter plot for gut microbiota abundance (genus Romboutsia id.11347) on oesophageal cancer

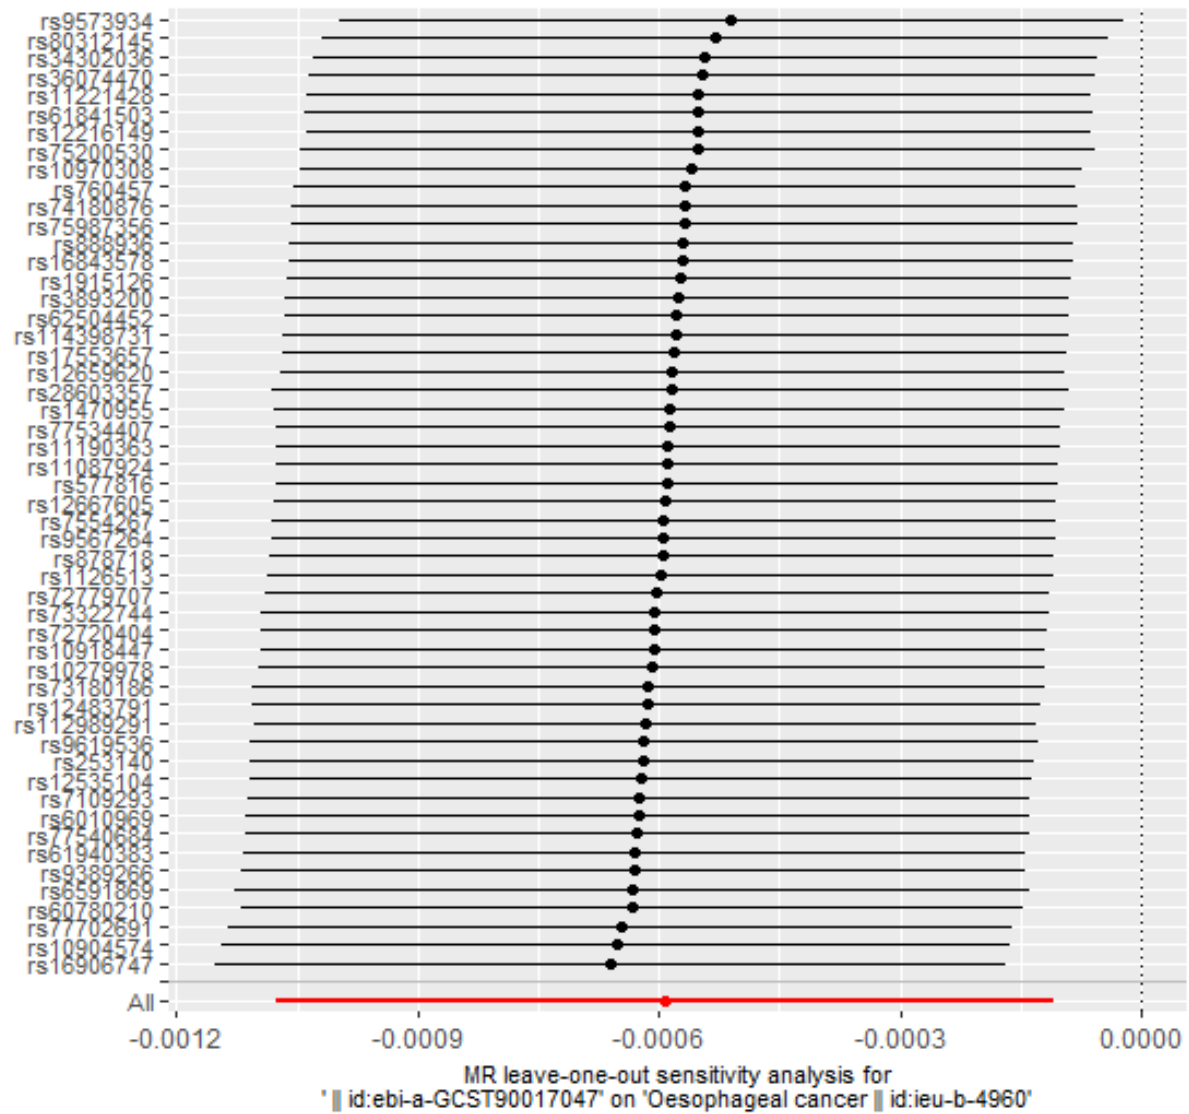

MR Method

- Inverse variance weighted
- MR Egger

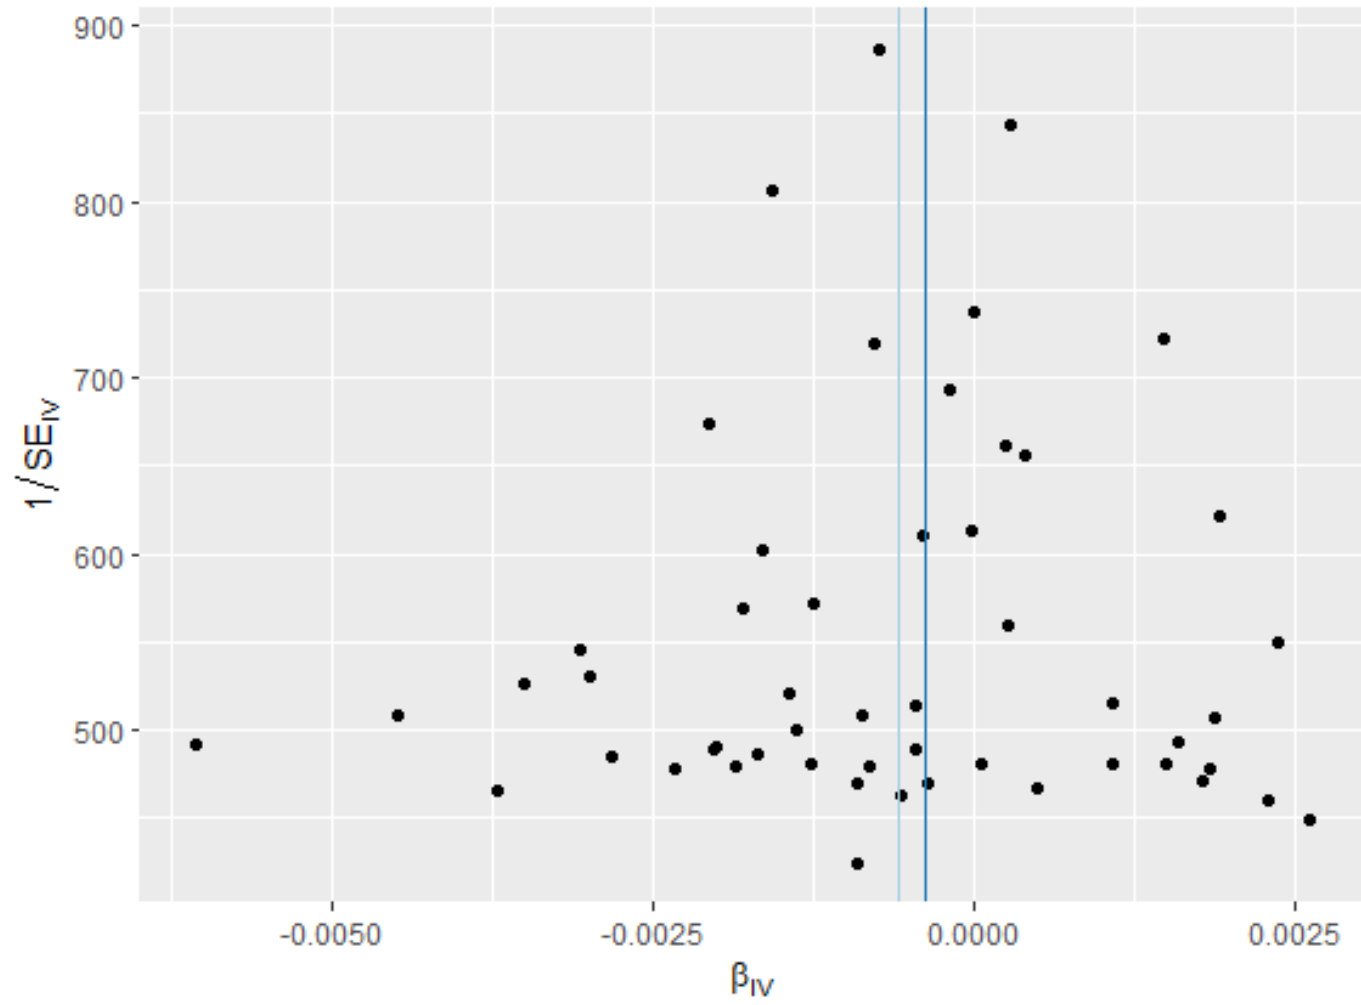

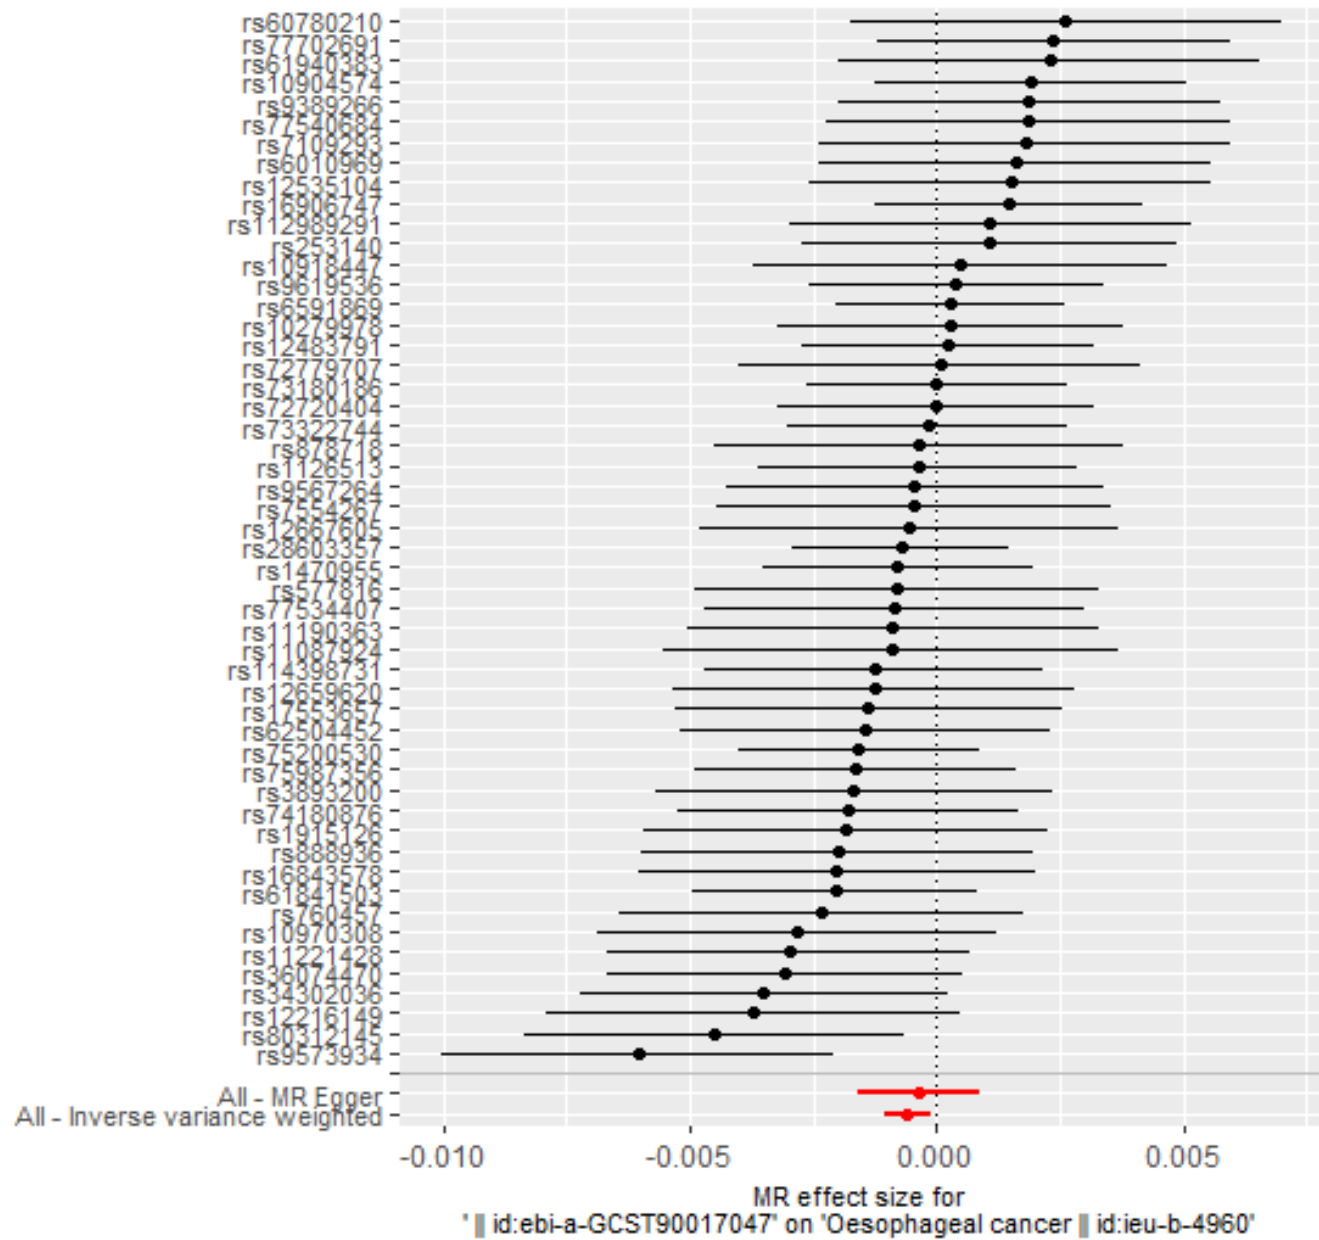

MR Test

- Inverse variance weighted
- MR Egger
- Simple mode
- Weighted median
- Weighted mode

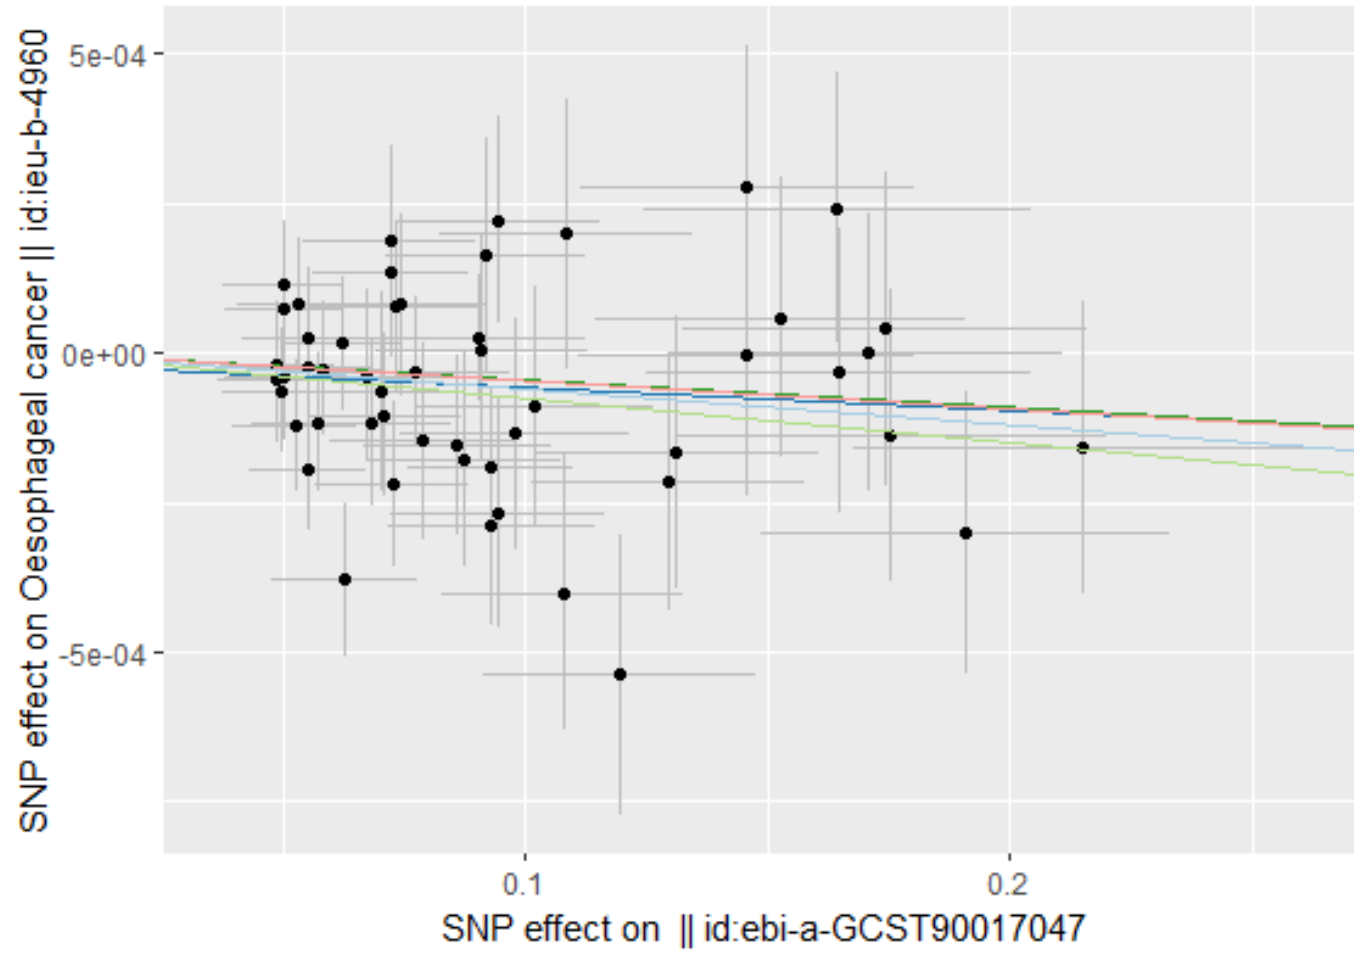

**Figure 20** Leave-one-out analysis, funnel plot, MR effect size and scatter plot for gut microbiota abundance (genus Ruminococcaceae UCG010 id.11367) on oesophageal cancer

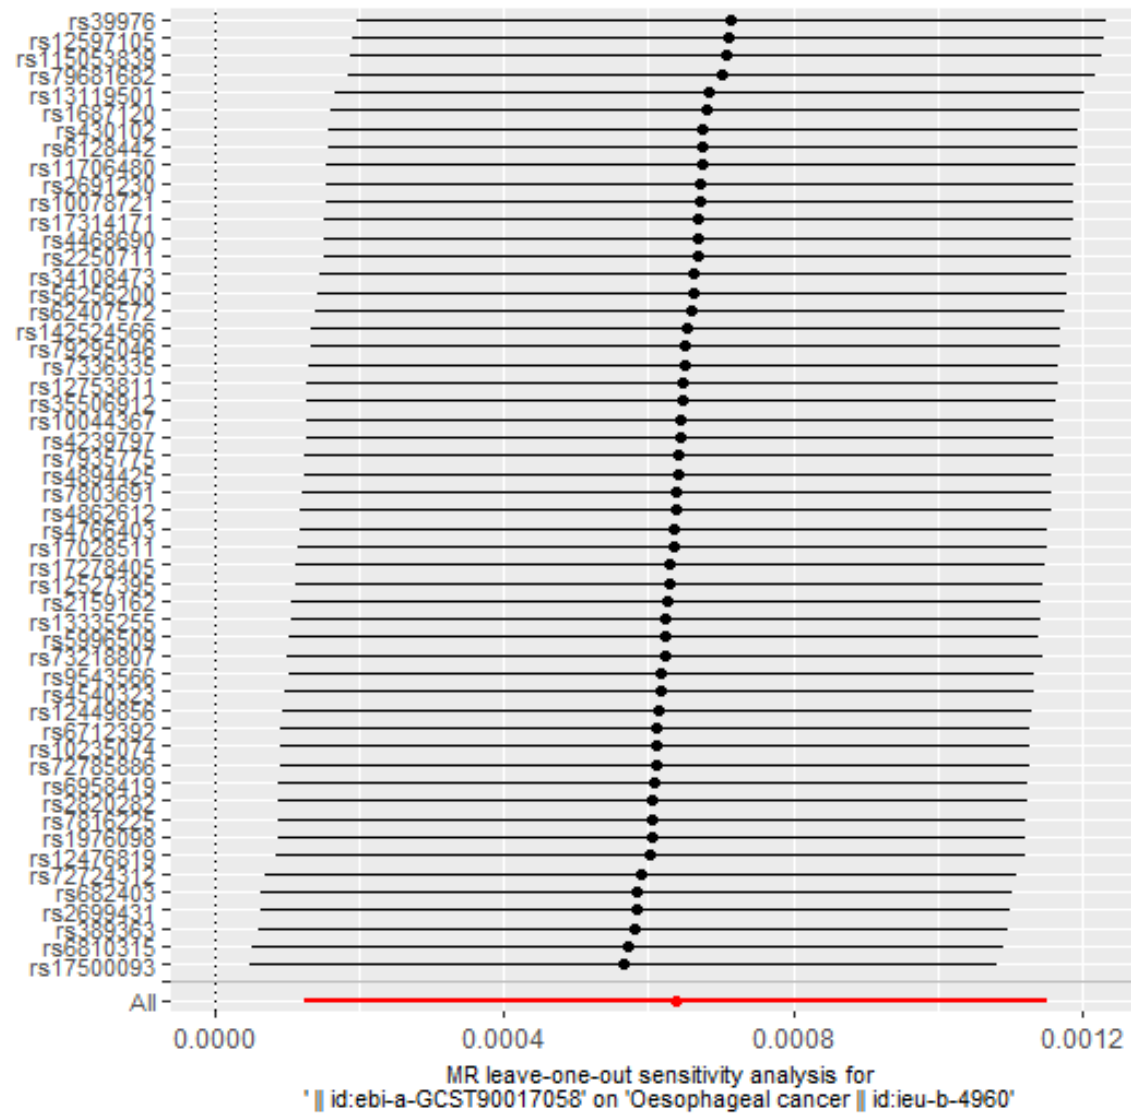

MR Method

- Inverse variance weighted
- MR Egger

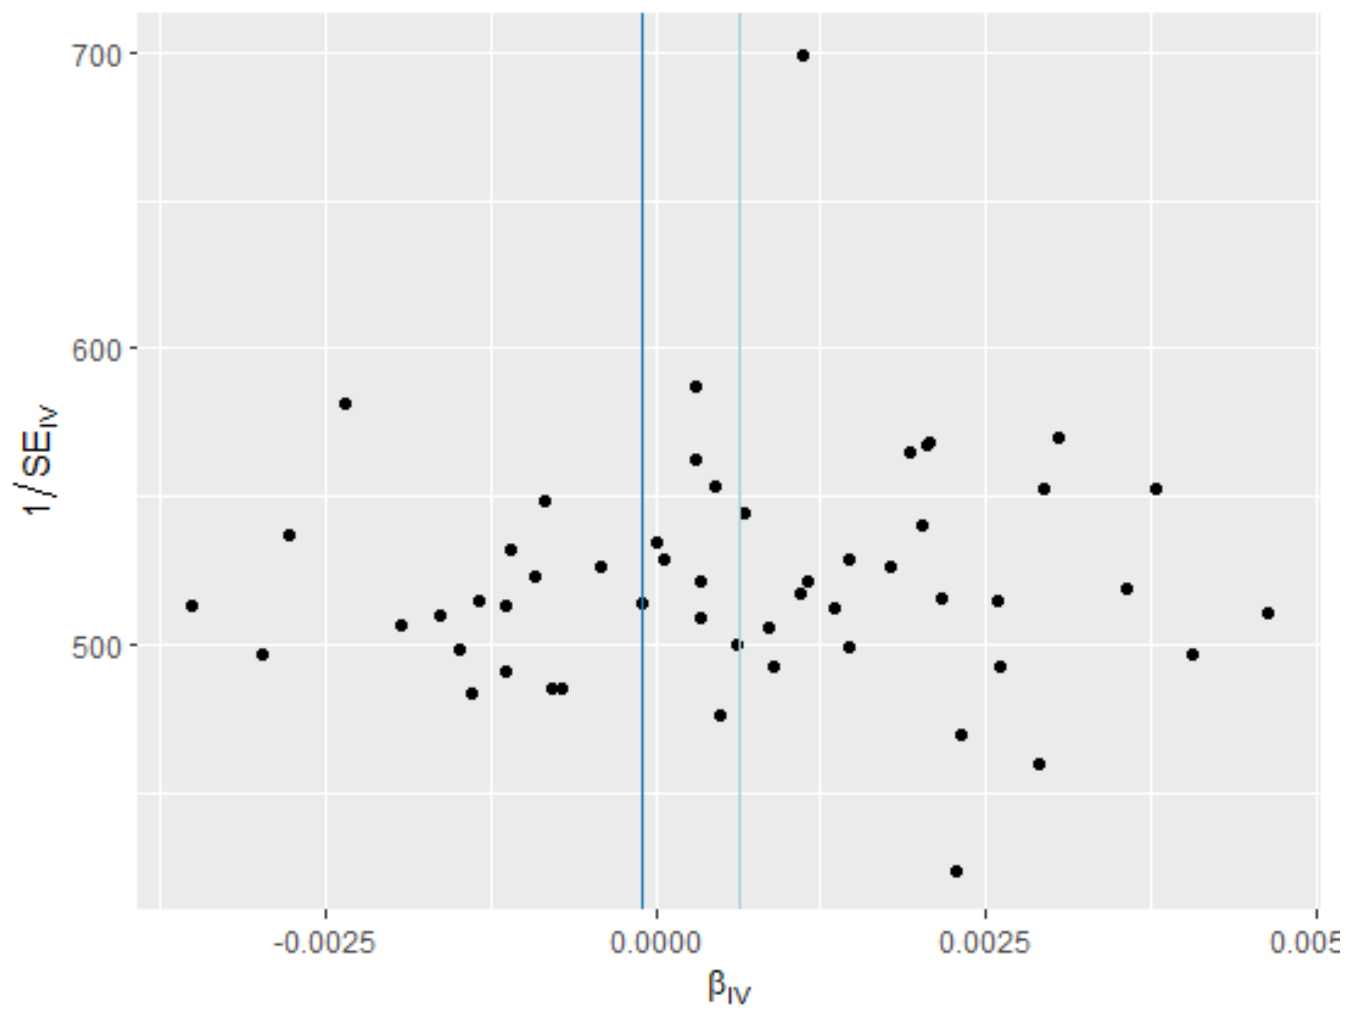

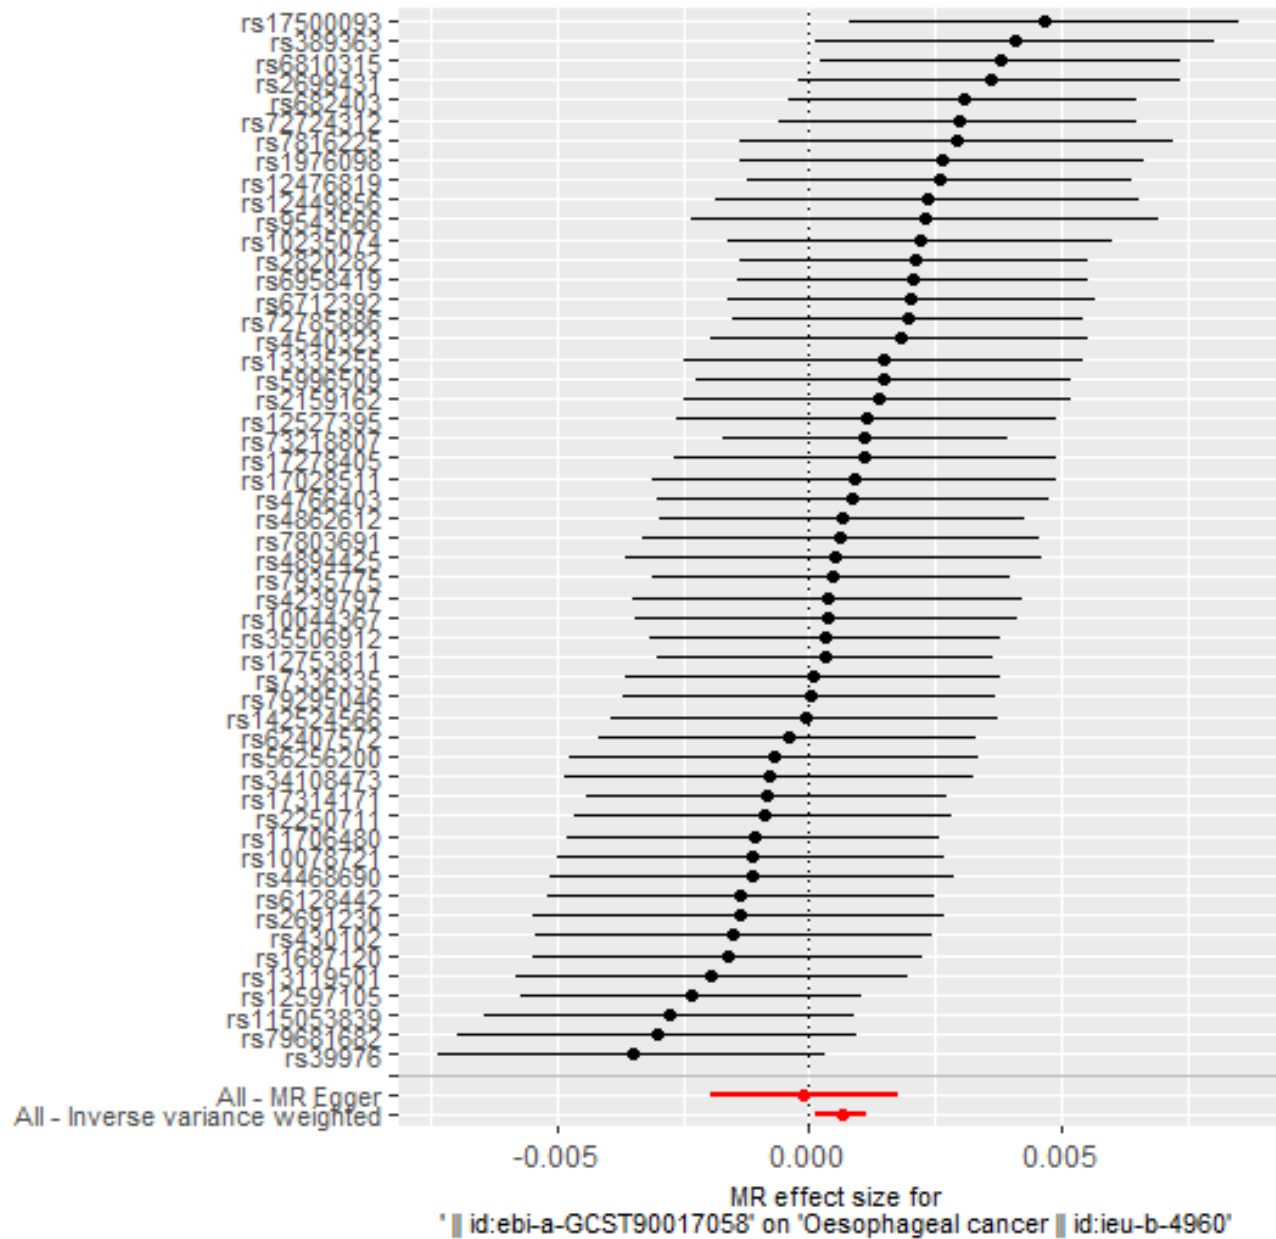

MR Test

- Inverse variance weighted
- MR Egger
- Simple mode
- Weighted median
- Weighted mode

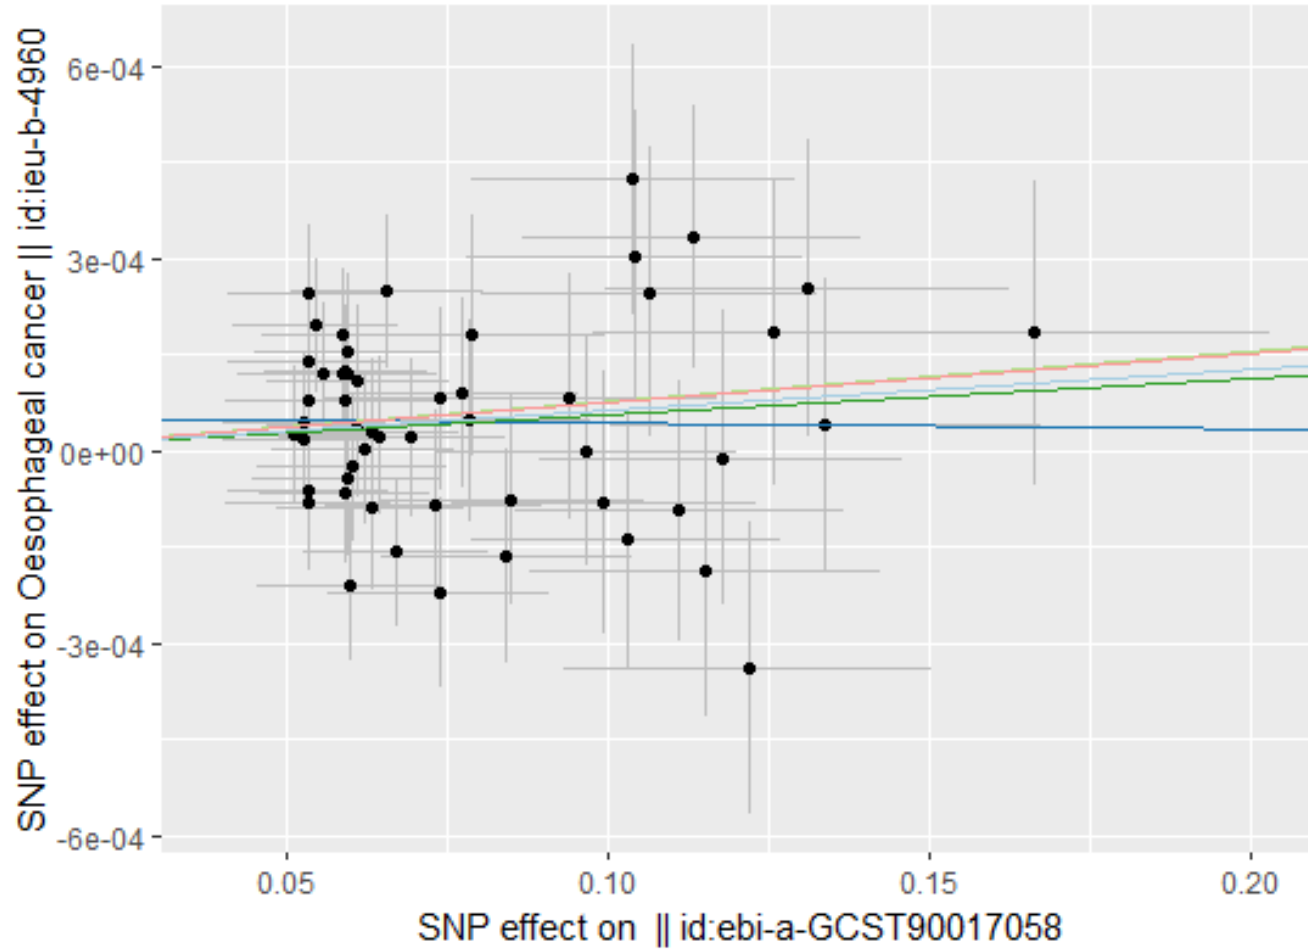



**Figure 21** Leave-one-out analysis, funnel plot, MR effect size and scatter plot for gut microbiota abundance (genus Streptococcus id.1853) on oesophageal cancer

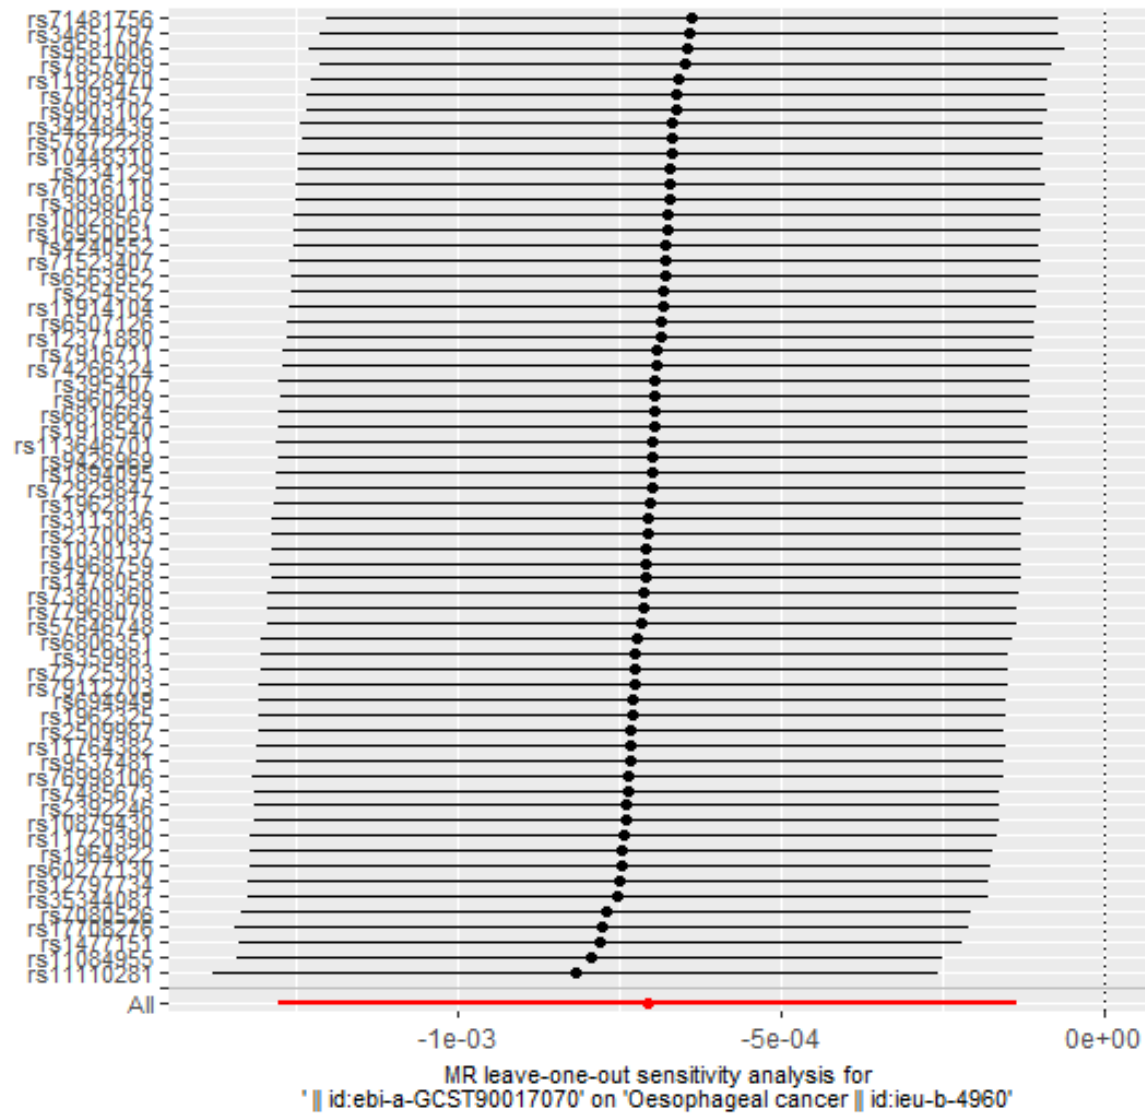

MR Method

- Inverse variance weighted
- MR Egger

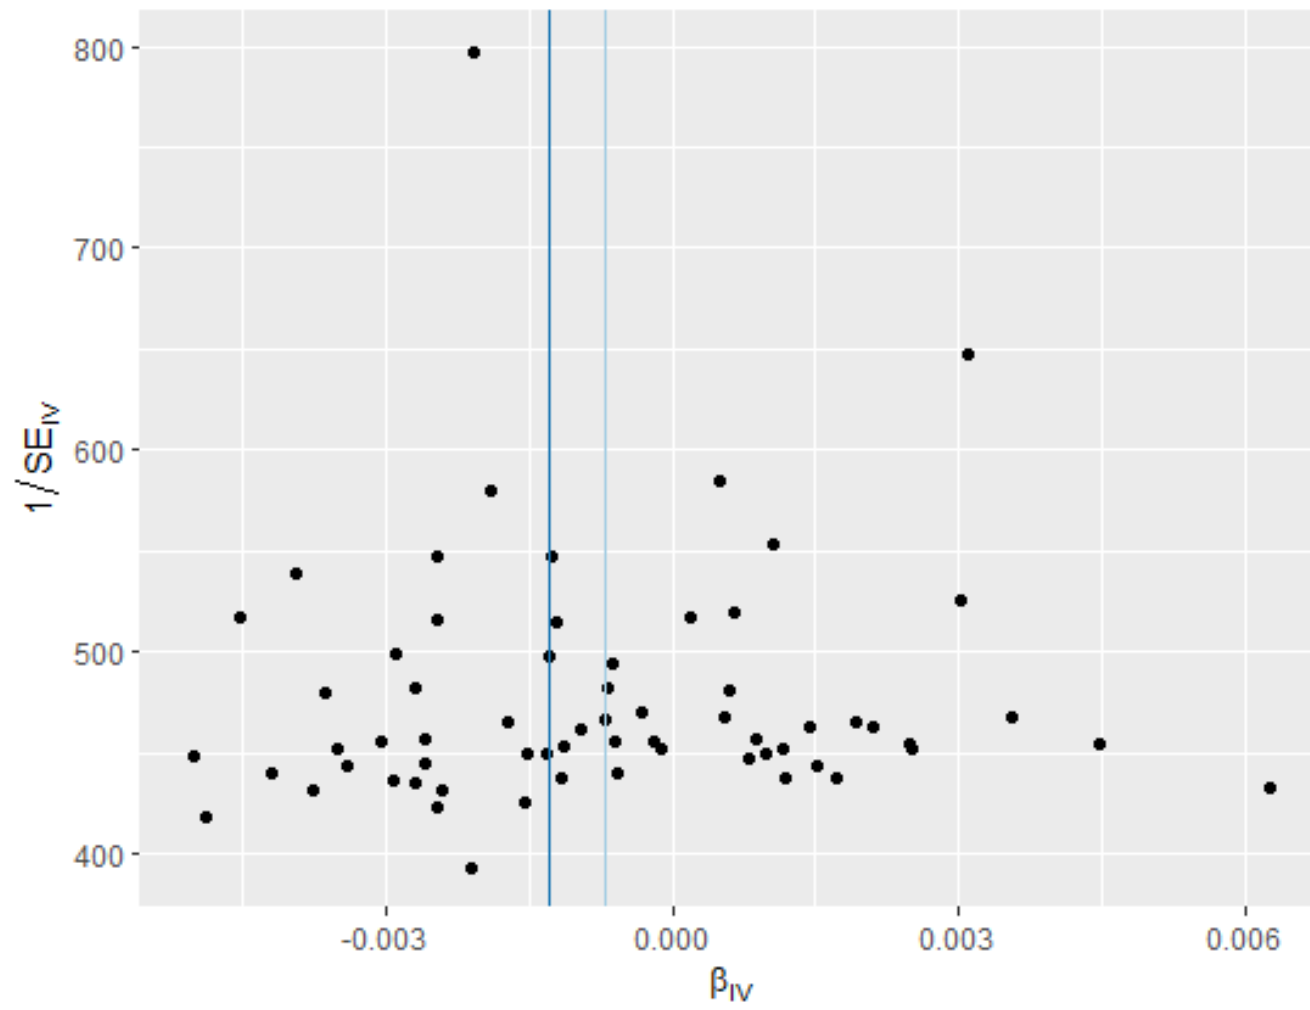

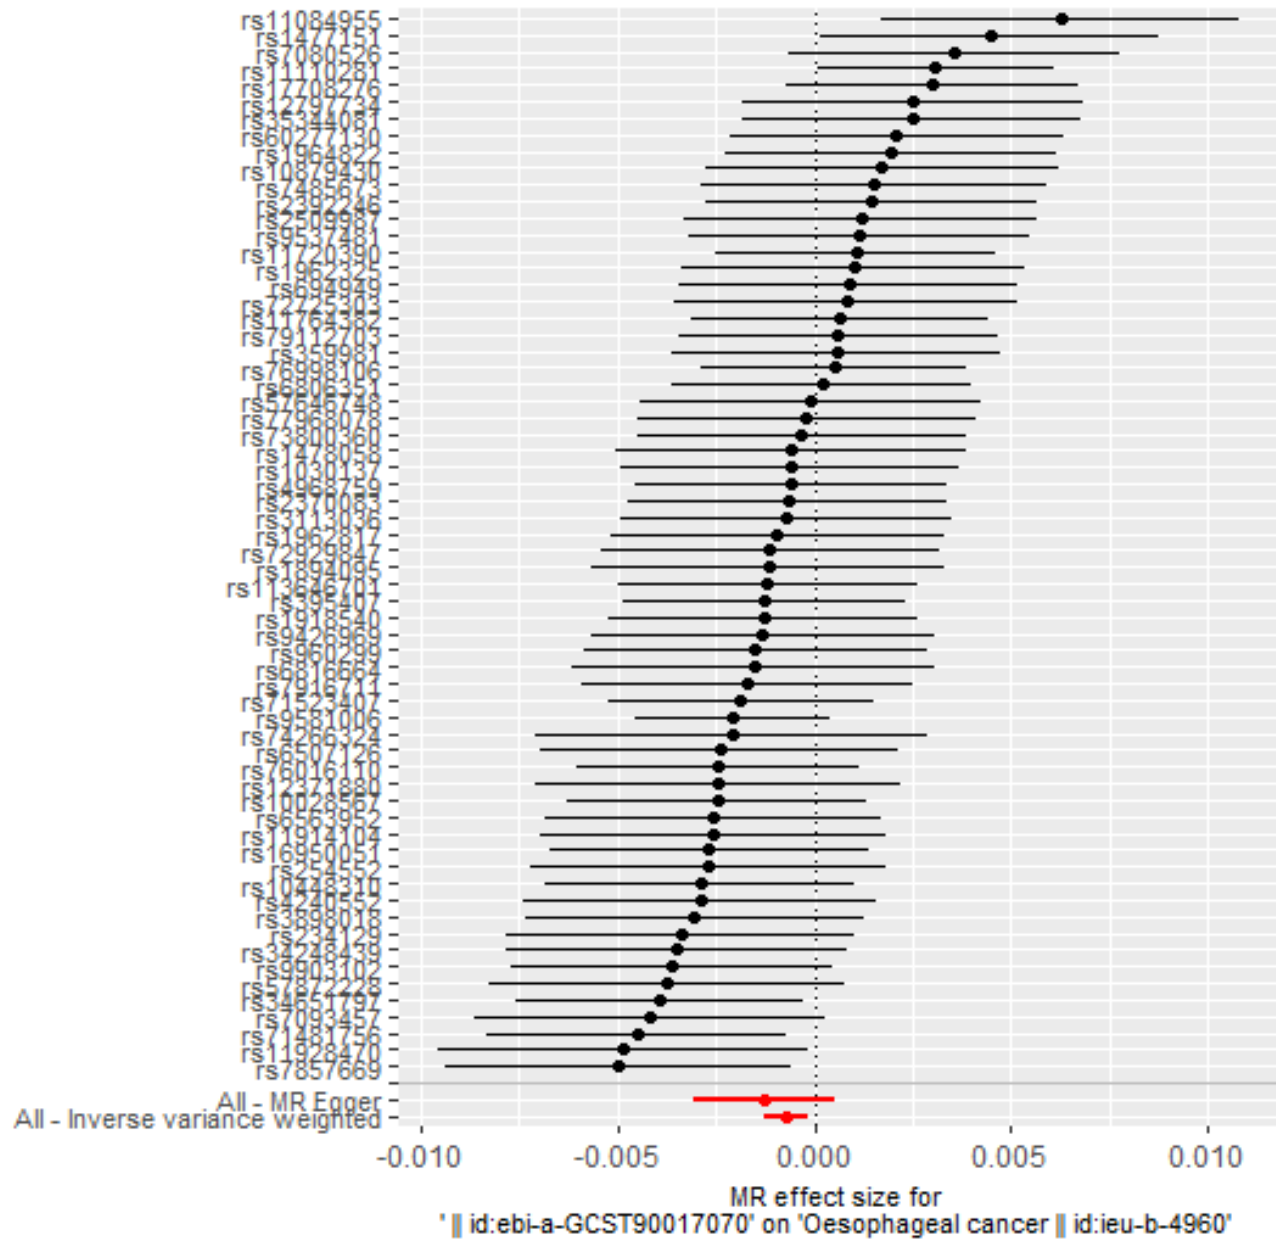

MR Test

- Inverse variance weighted
- MR Egger
- Simple mode
- Weighted median
- Weighted mode

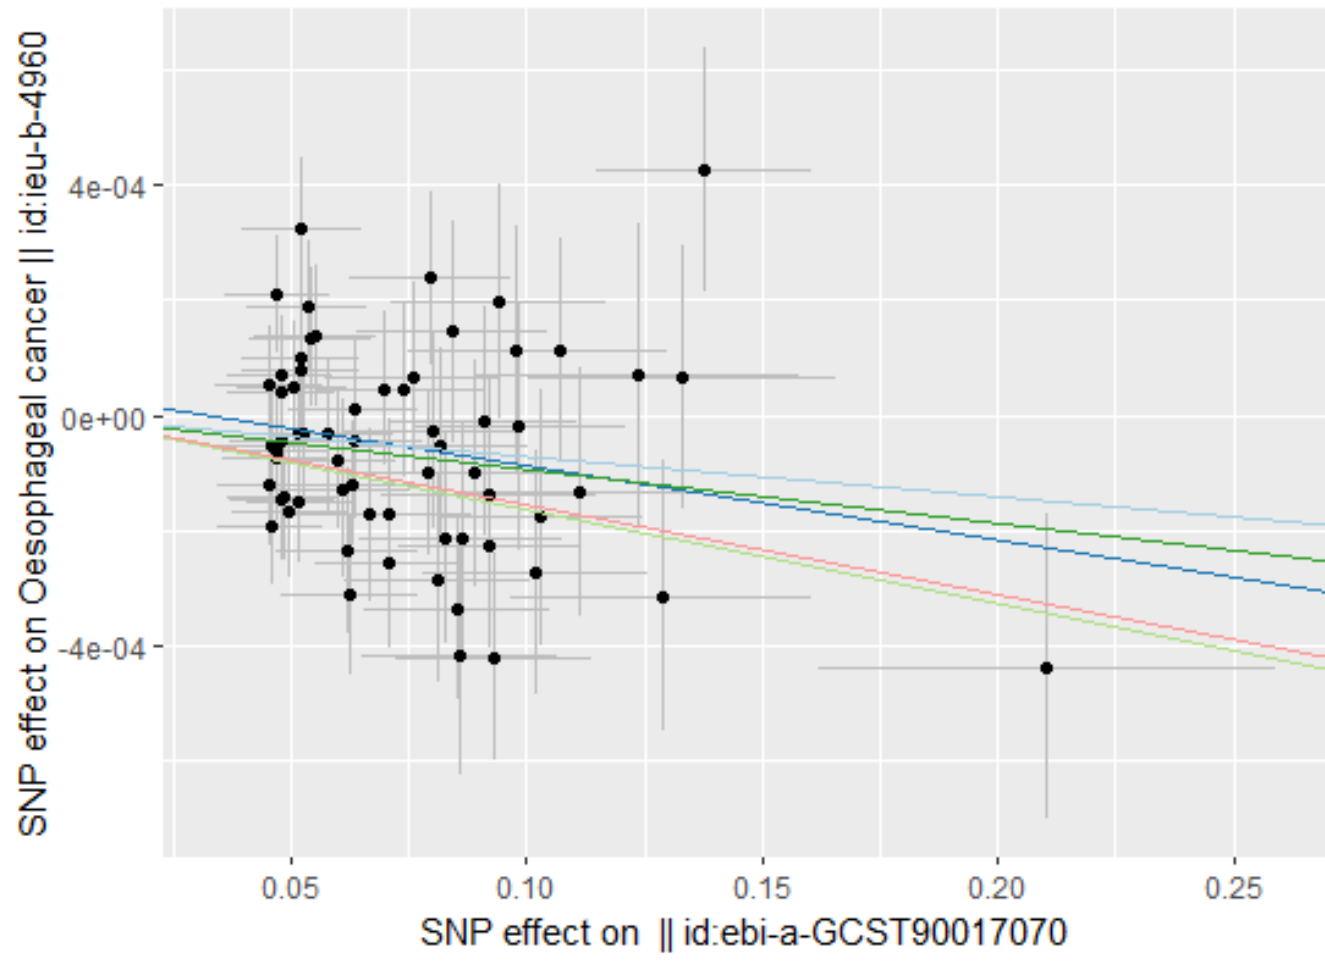

**Figure 22** Leave-one-out analysis, funnel plot, MR effect size and scatter plot for gut microbiota abundance (order Desulfovibrionales id.3156) on oesophageal cancer

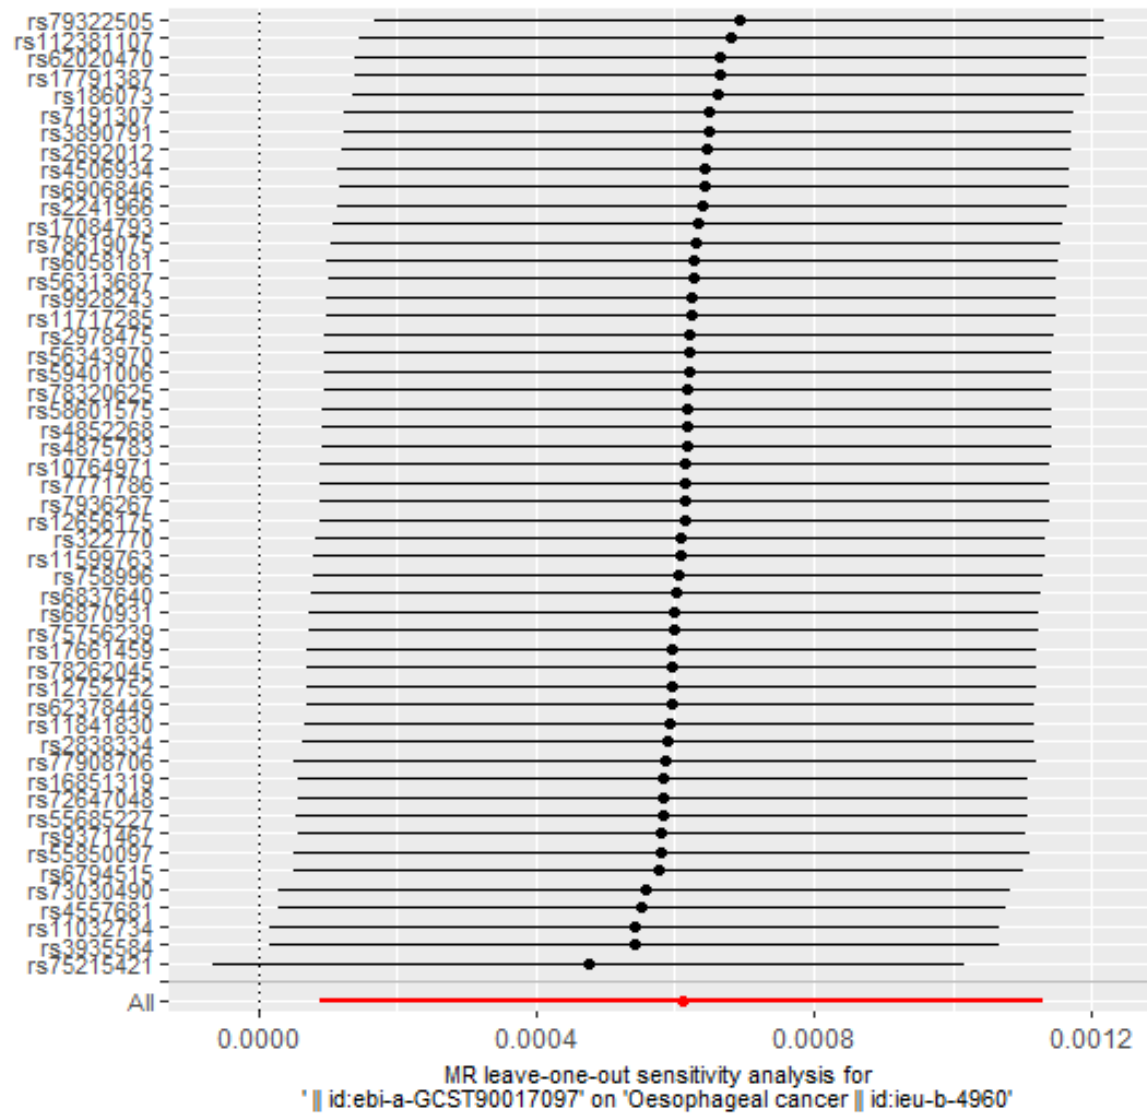

MR Method

- Inverse variance weighted
- MR Egger

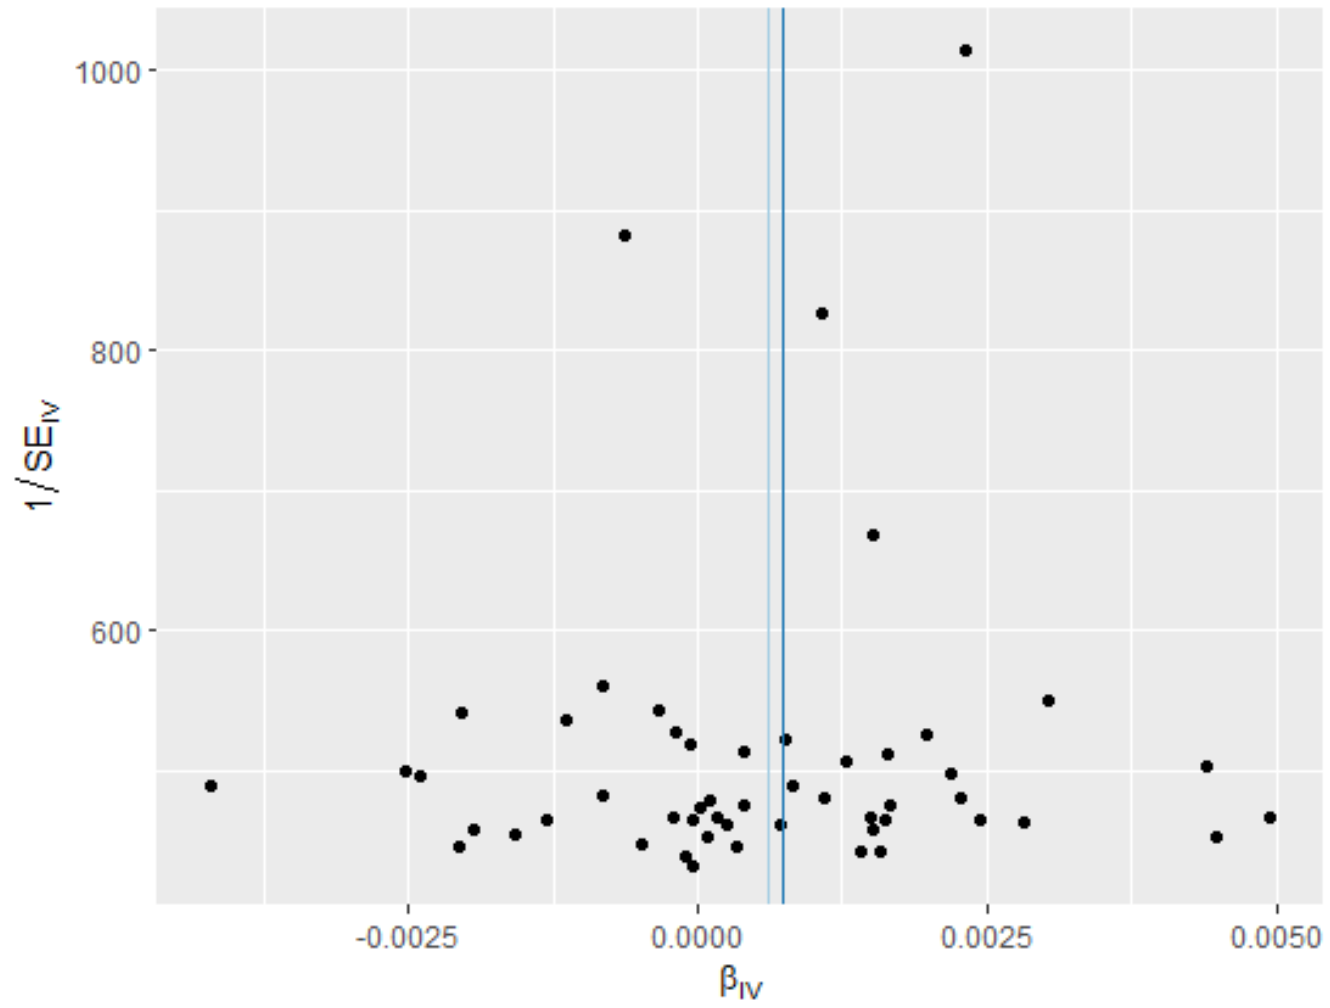

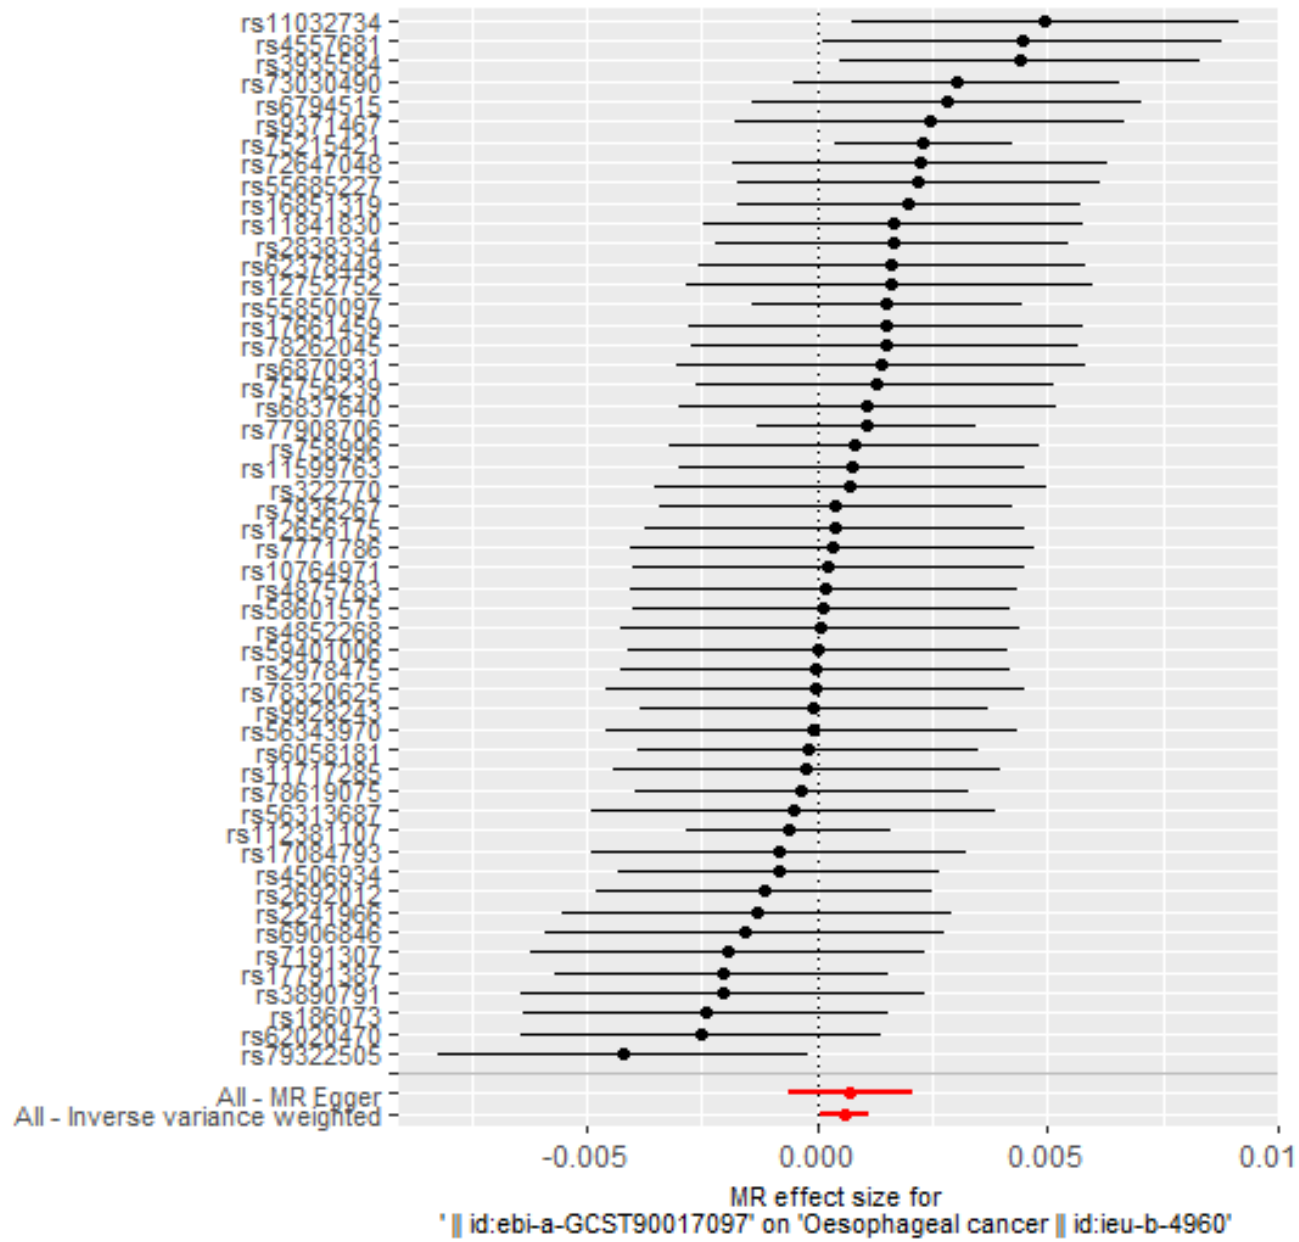

MR Test

- Inverse variance weighted
- MR Egger
- Simple mode
- Weighted median
- Weighted mode

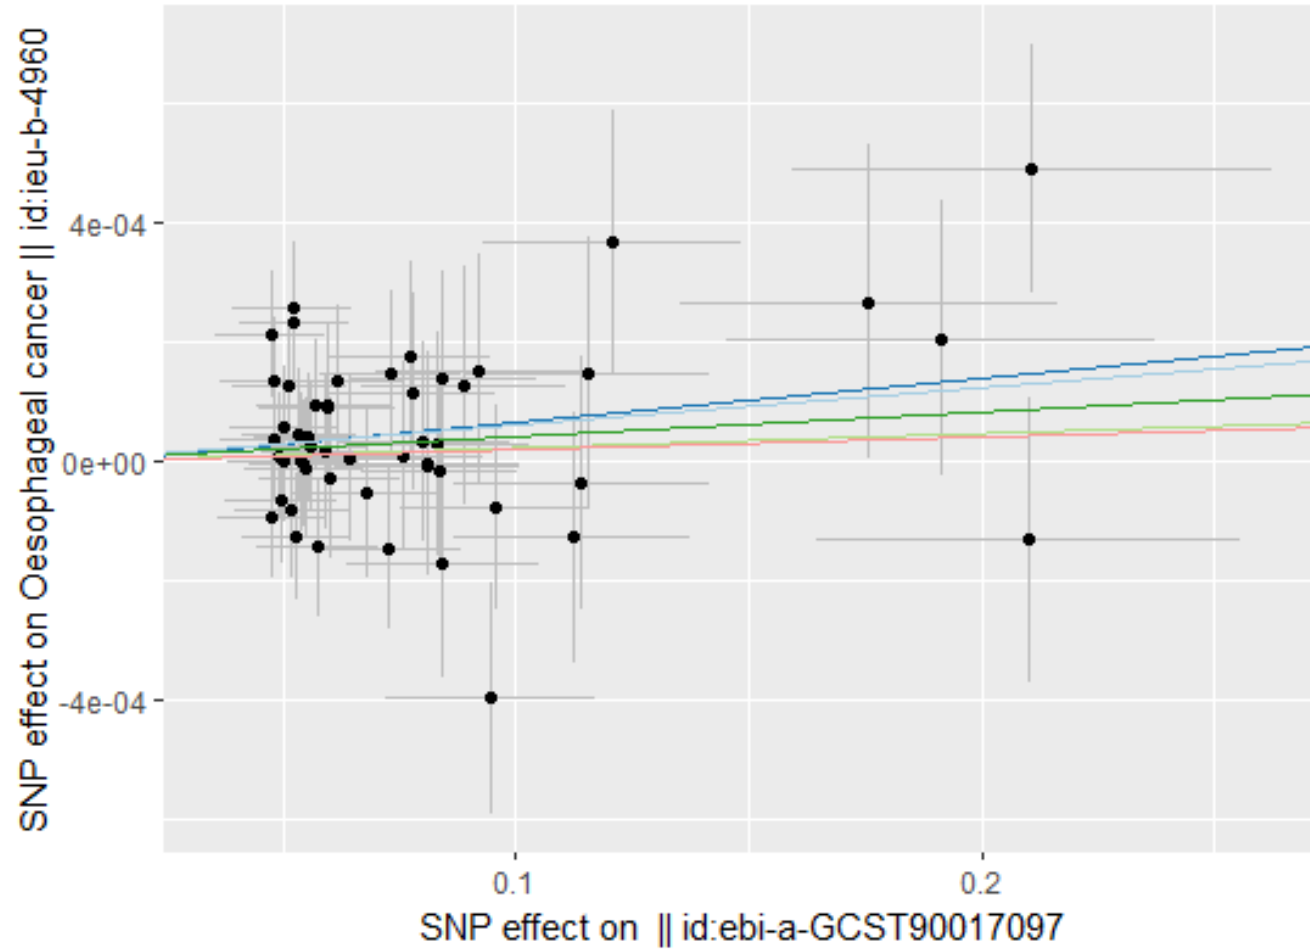



**Figure 23** Leave-one-out analysis, funnel plot, MR effect size and scatter plot for gut microbiota abundance (order Pasteurellales id.3688) on oesophageal cancer

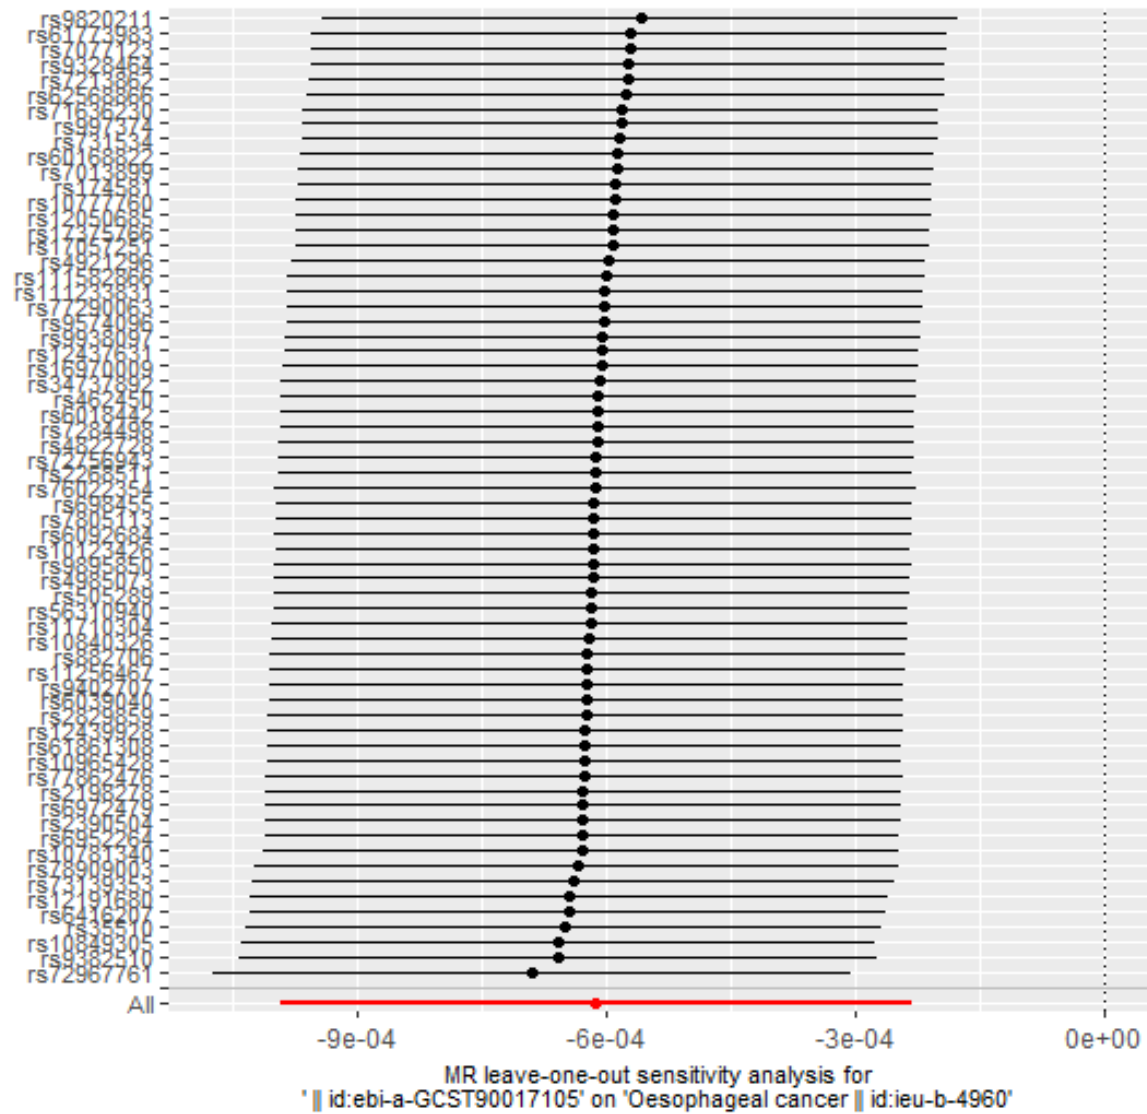

MR Method

- Inverse variance weighted
- MR Egger

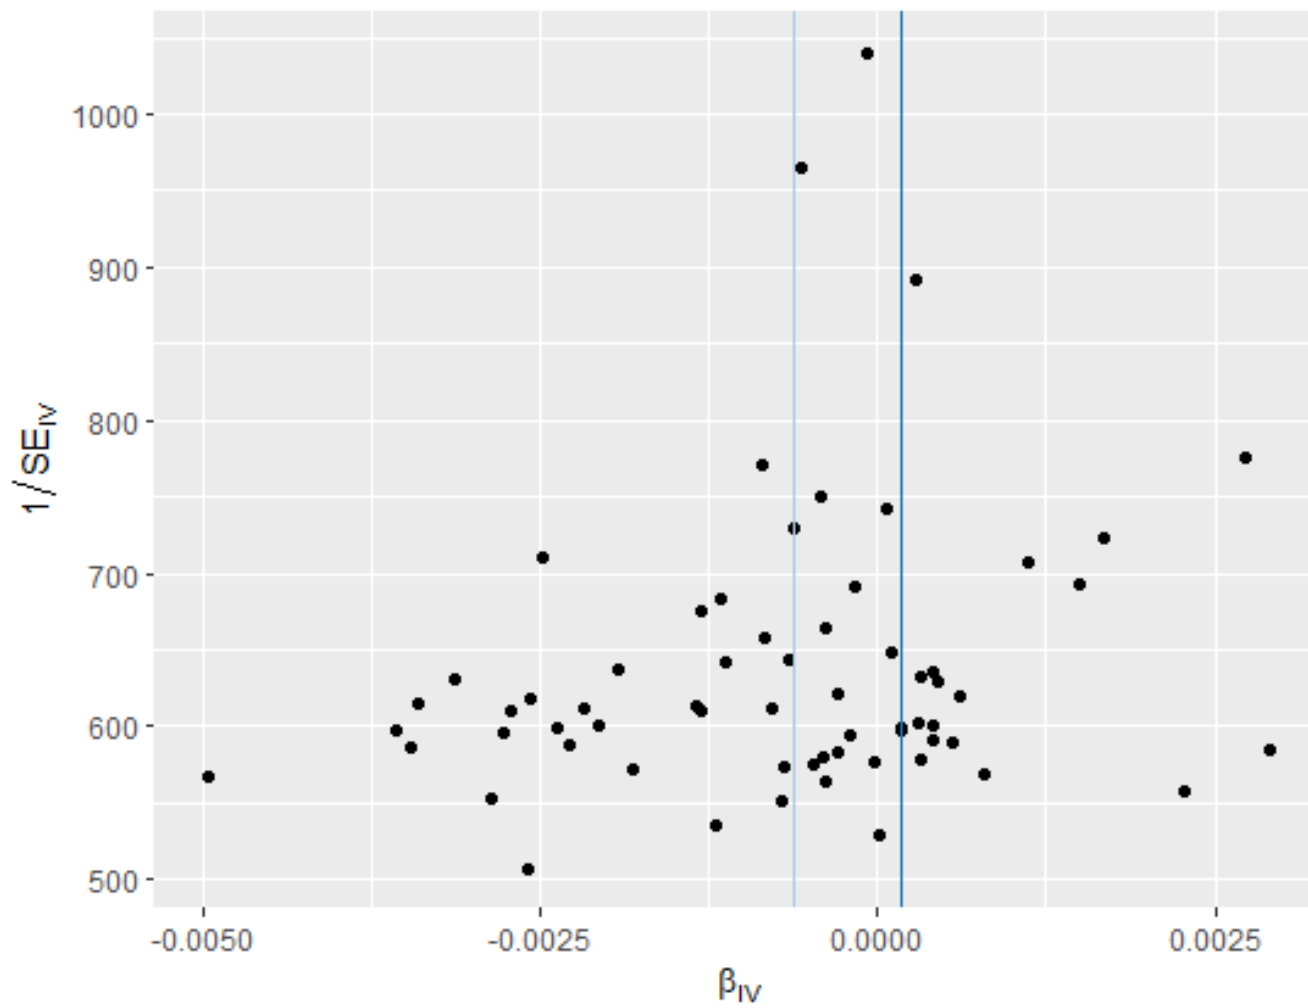

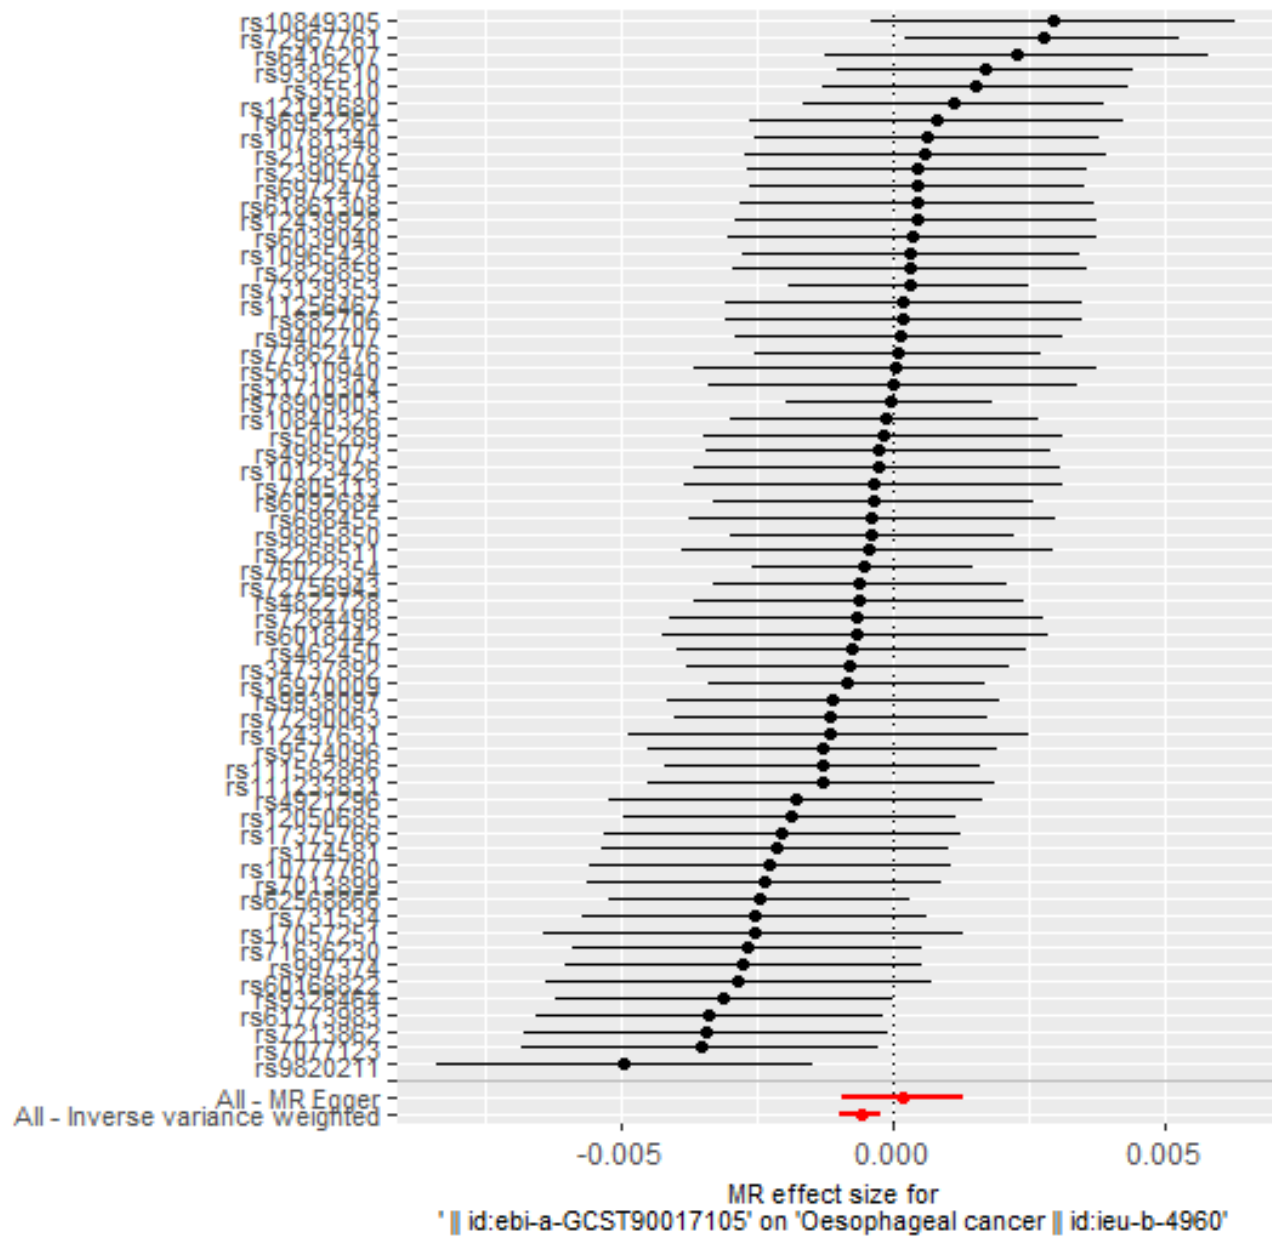

MR Test

- Inverse variance weighted
- MR Egger
- Simple mode
- Weighted median
- Weighted mode

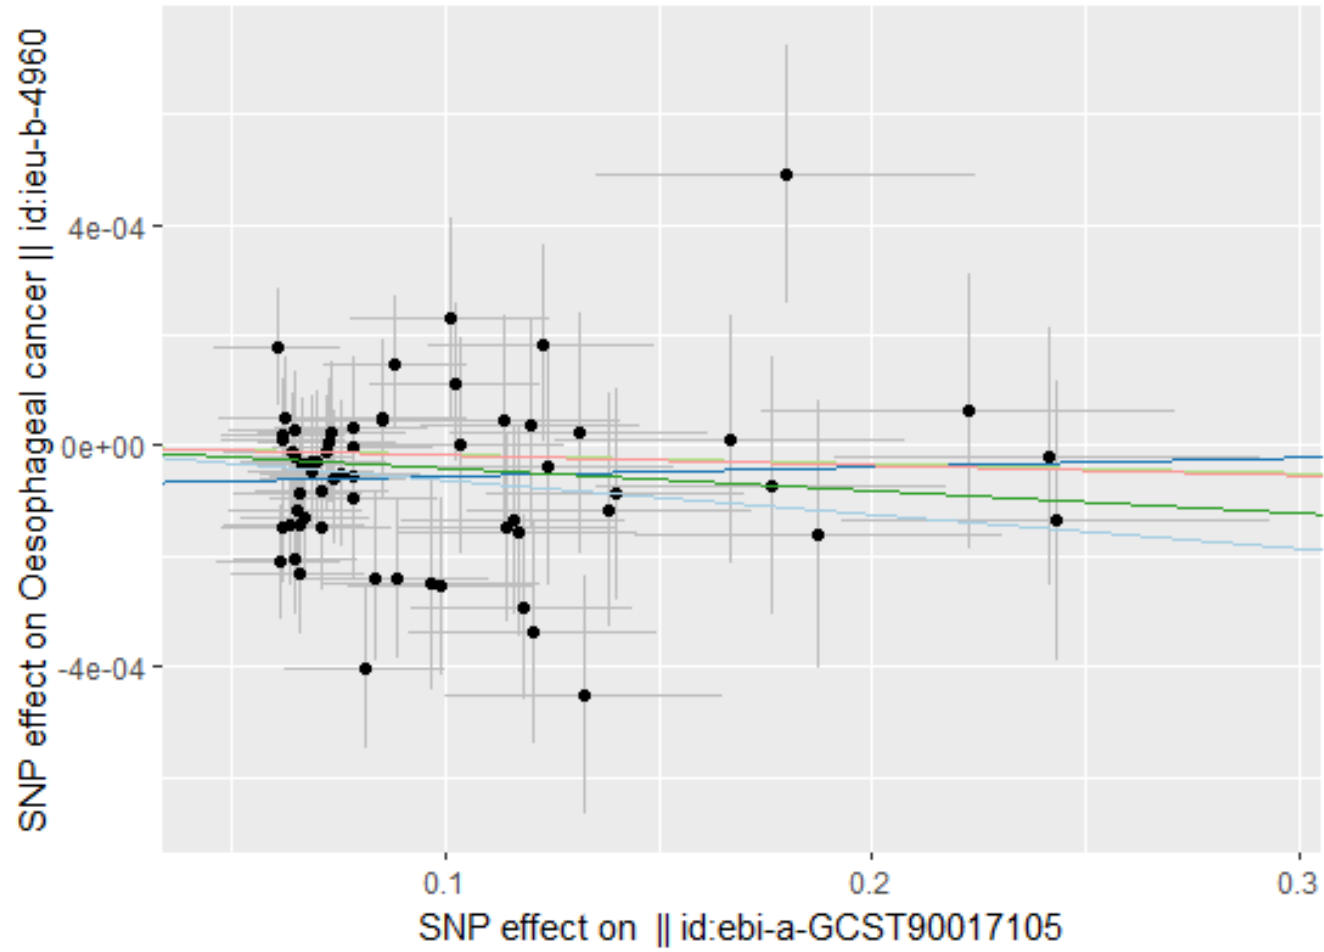

**Figure 24** Leave-one-out analysis, funnel plot, MR effect size and scatter plot for gut microbiota abundance (phylum Actinobacteria id.400) on oesophageal cancer

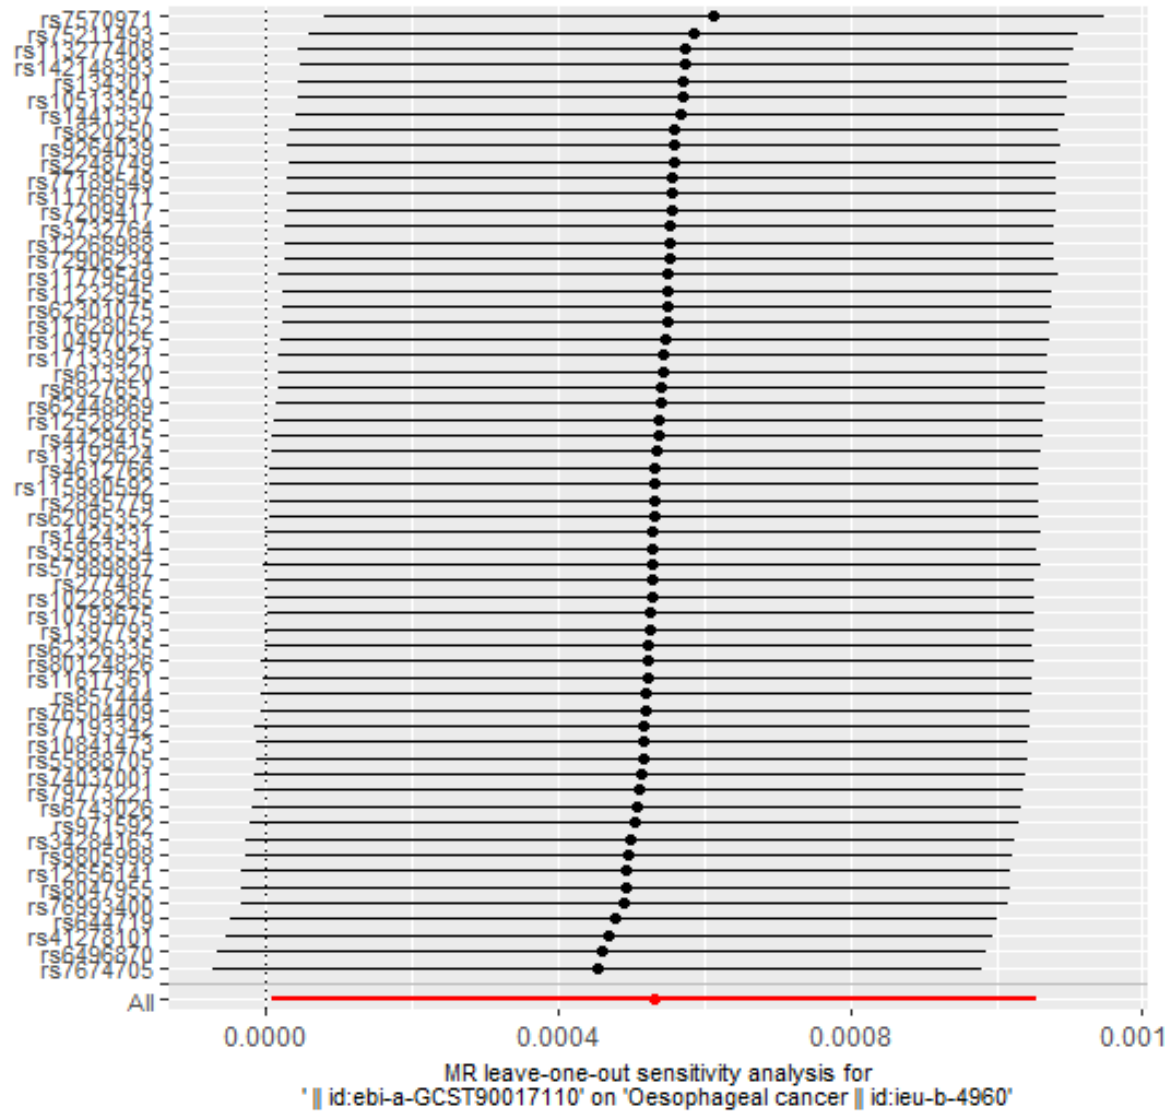

MR Method

- Inverse variance weighted
- MR Egger

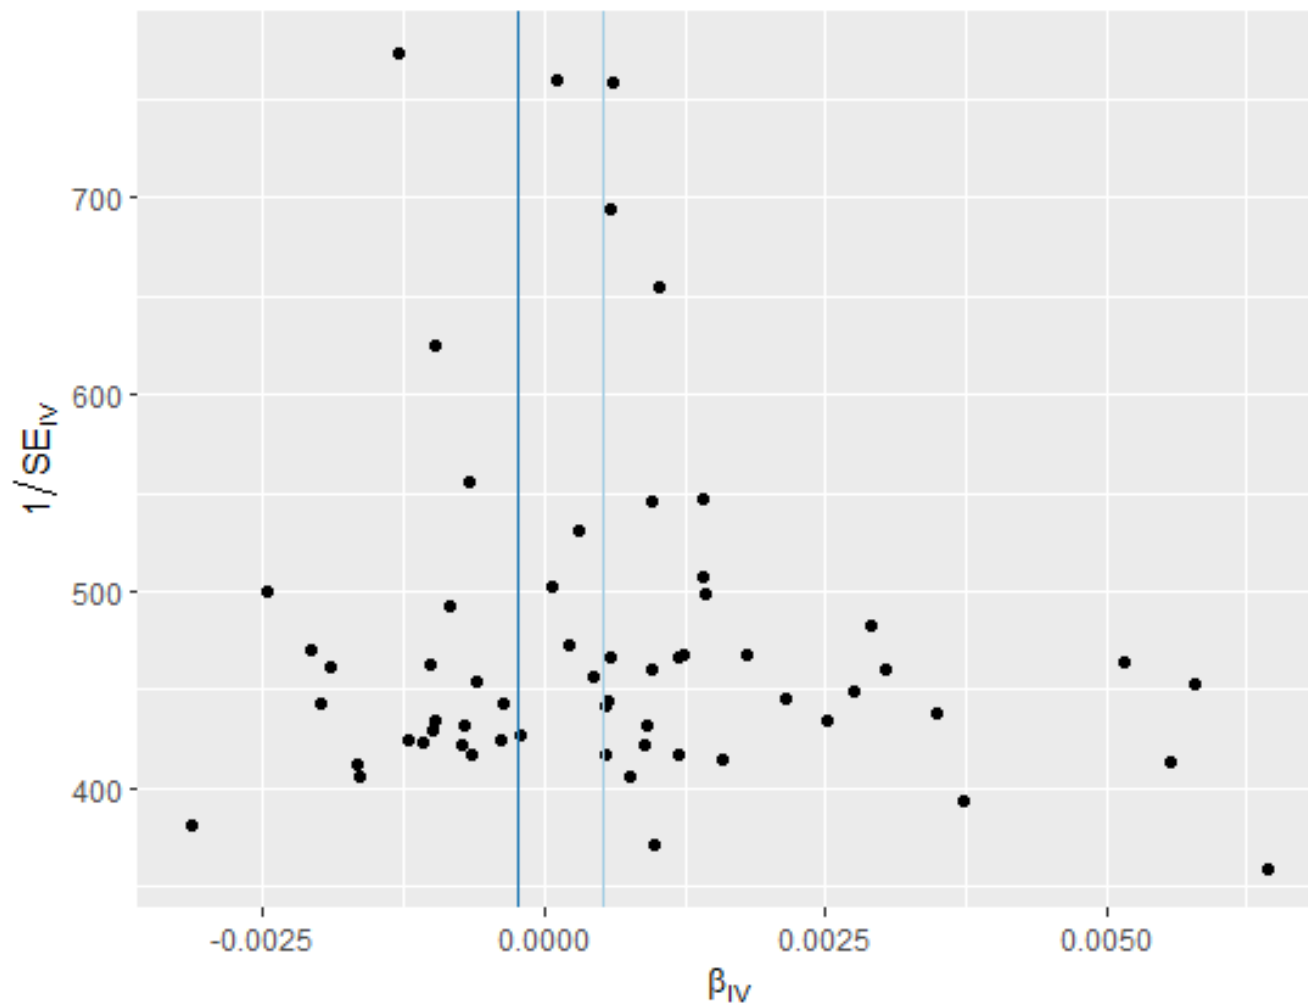

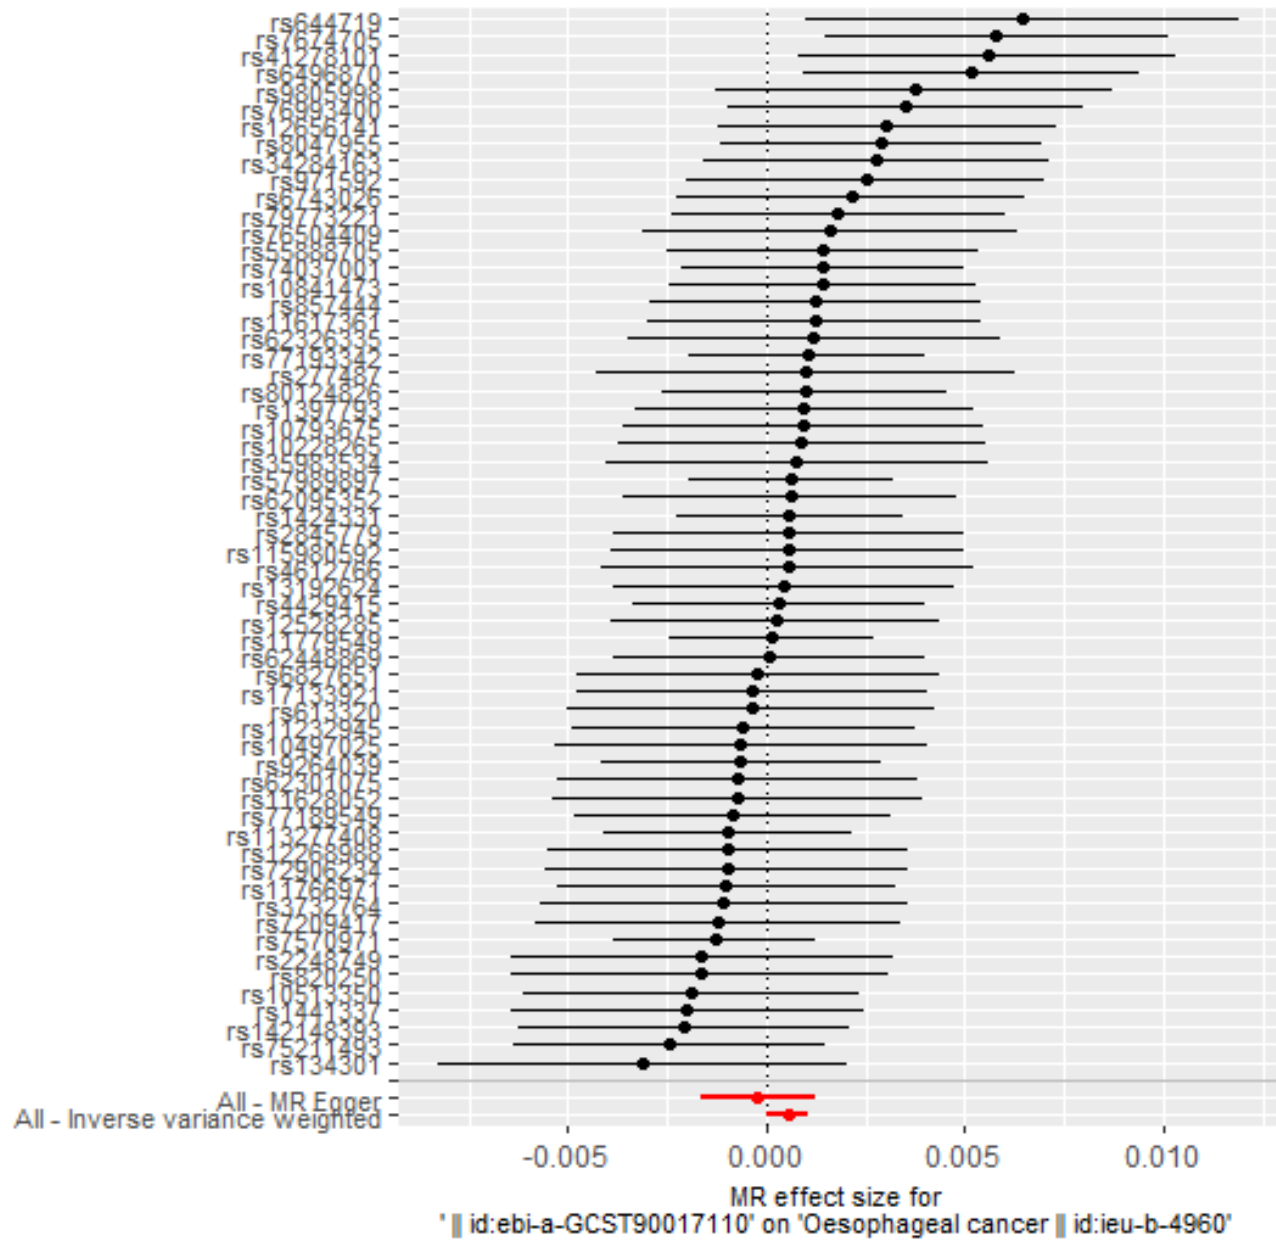

### MR Test

- Inverse variance weighted
- MR Egger
- Simple mode
- Weighted median
- Weighted mode

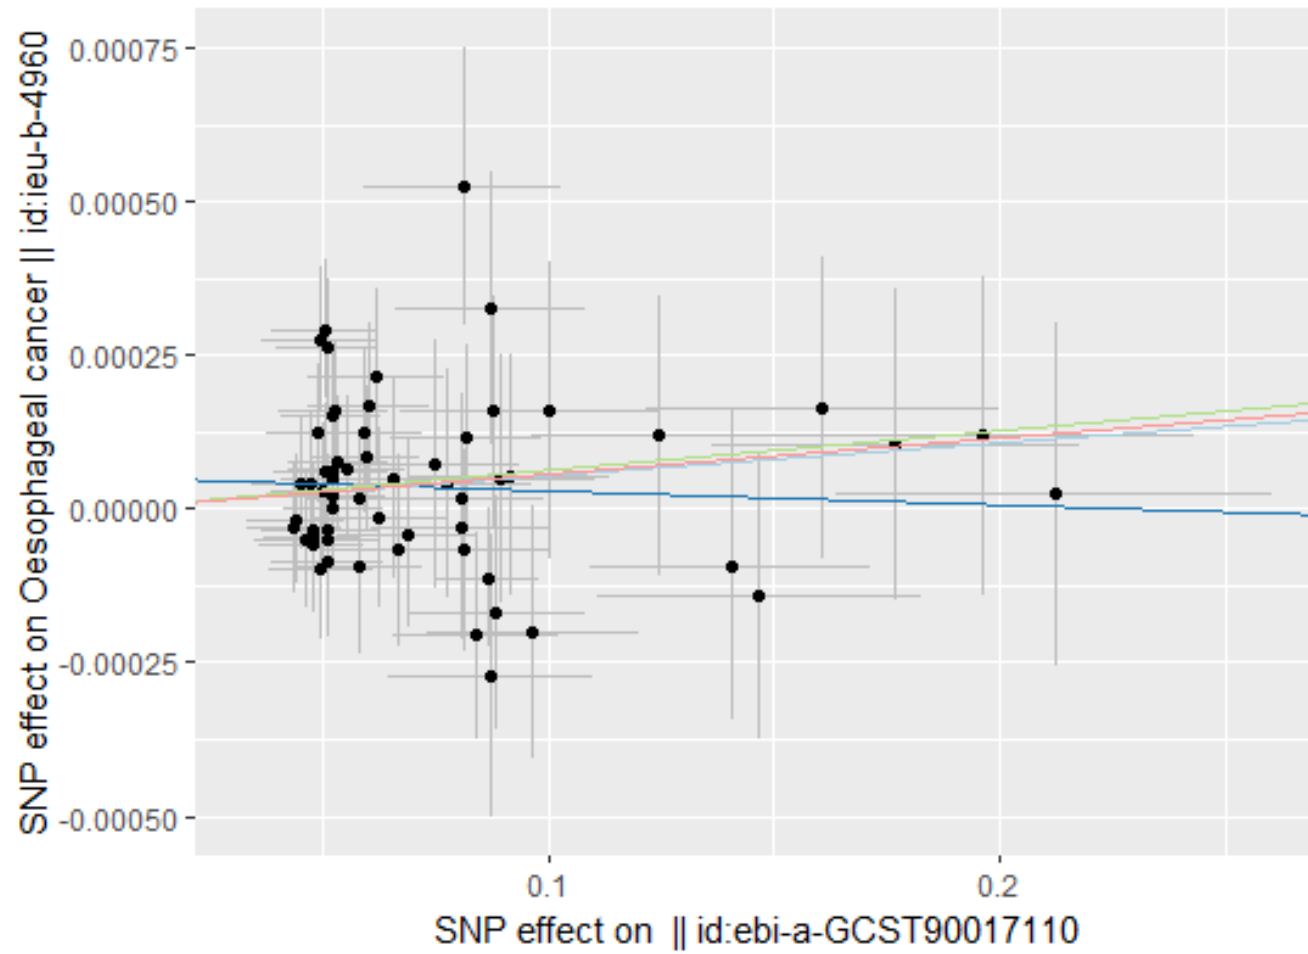



**Figure 25** Leave-one-out analysis, funnel plot, MR effect size and scatter plot for gut microbiota abundance (class Bacteroidia id.912) on ulcer of oesophagus

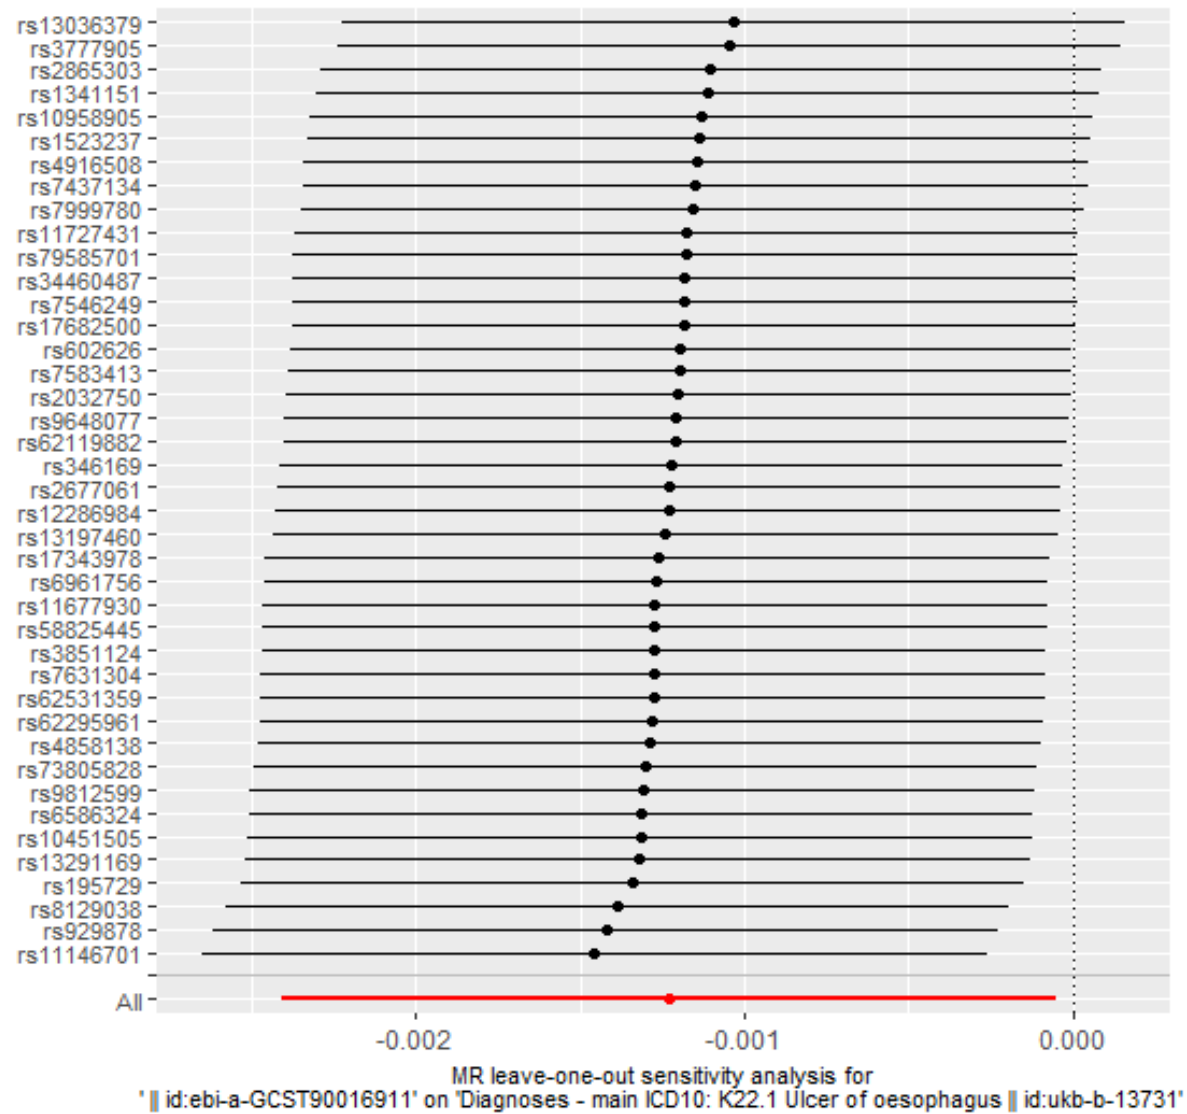

MR Method

- Inverse variance weighted
- MR Egger

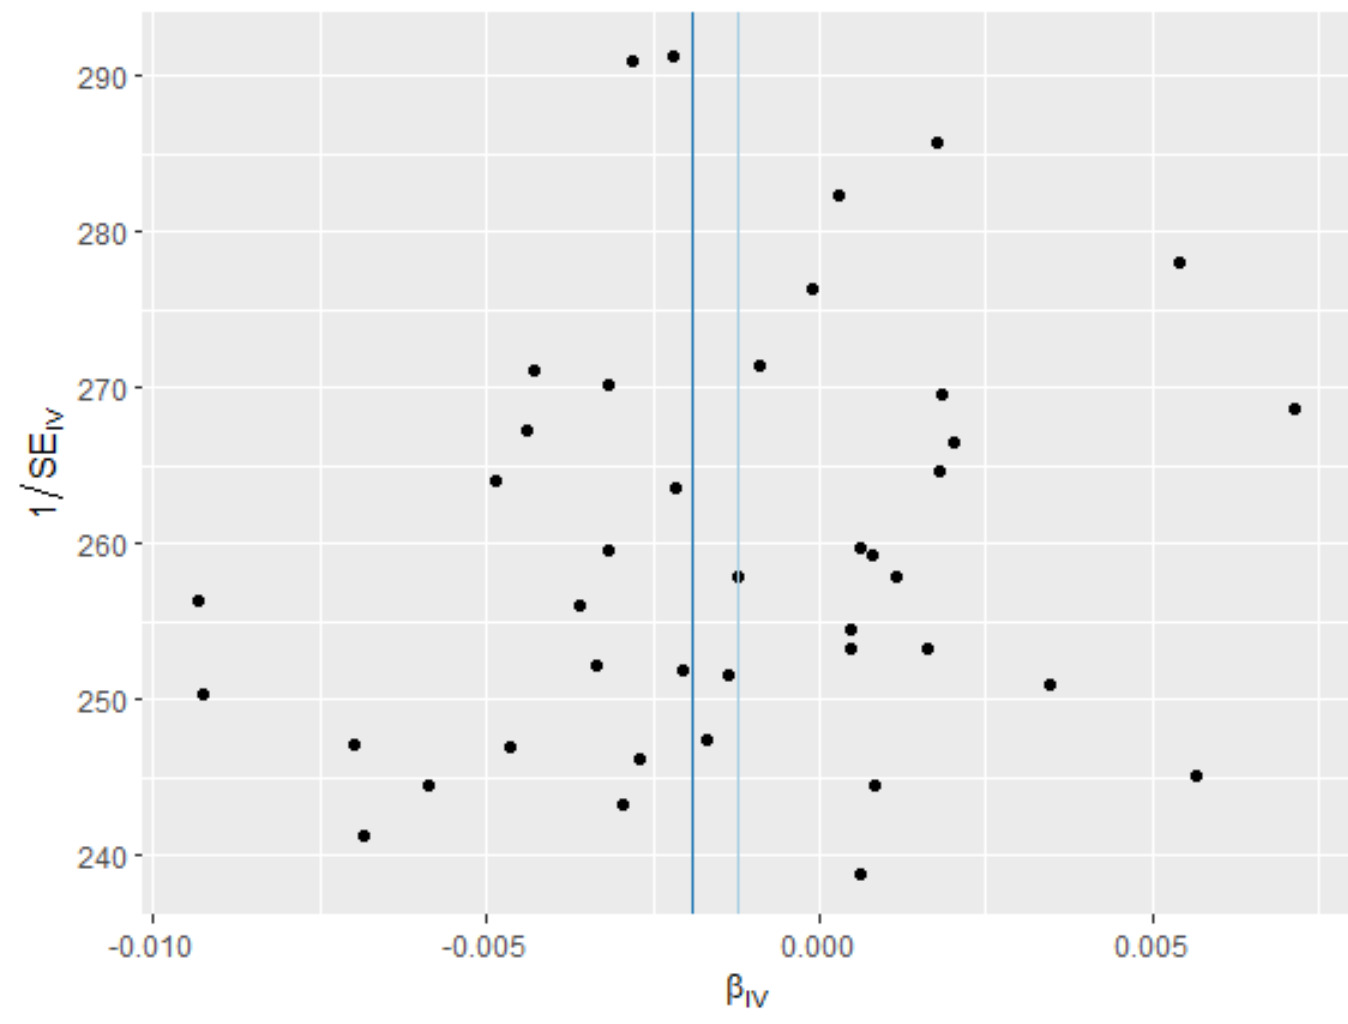

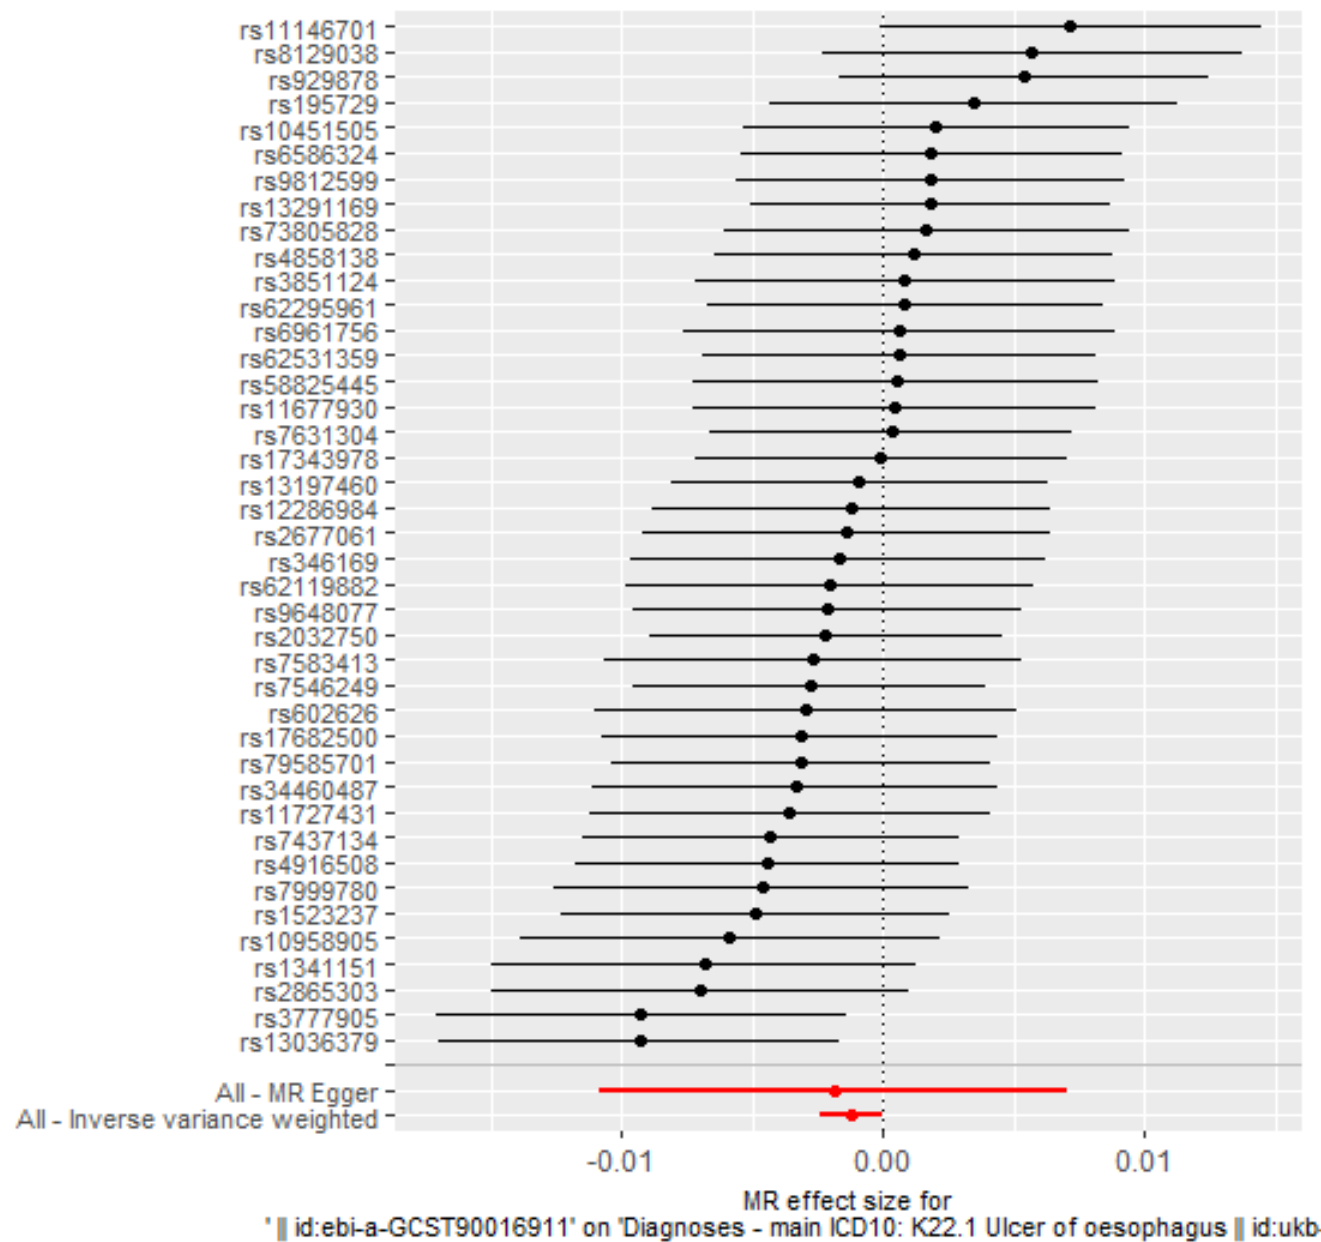

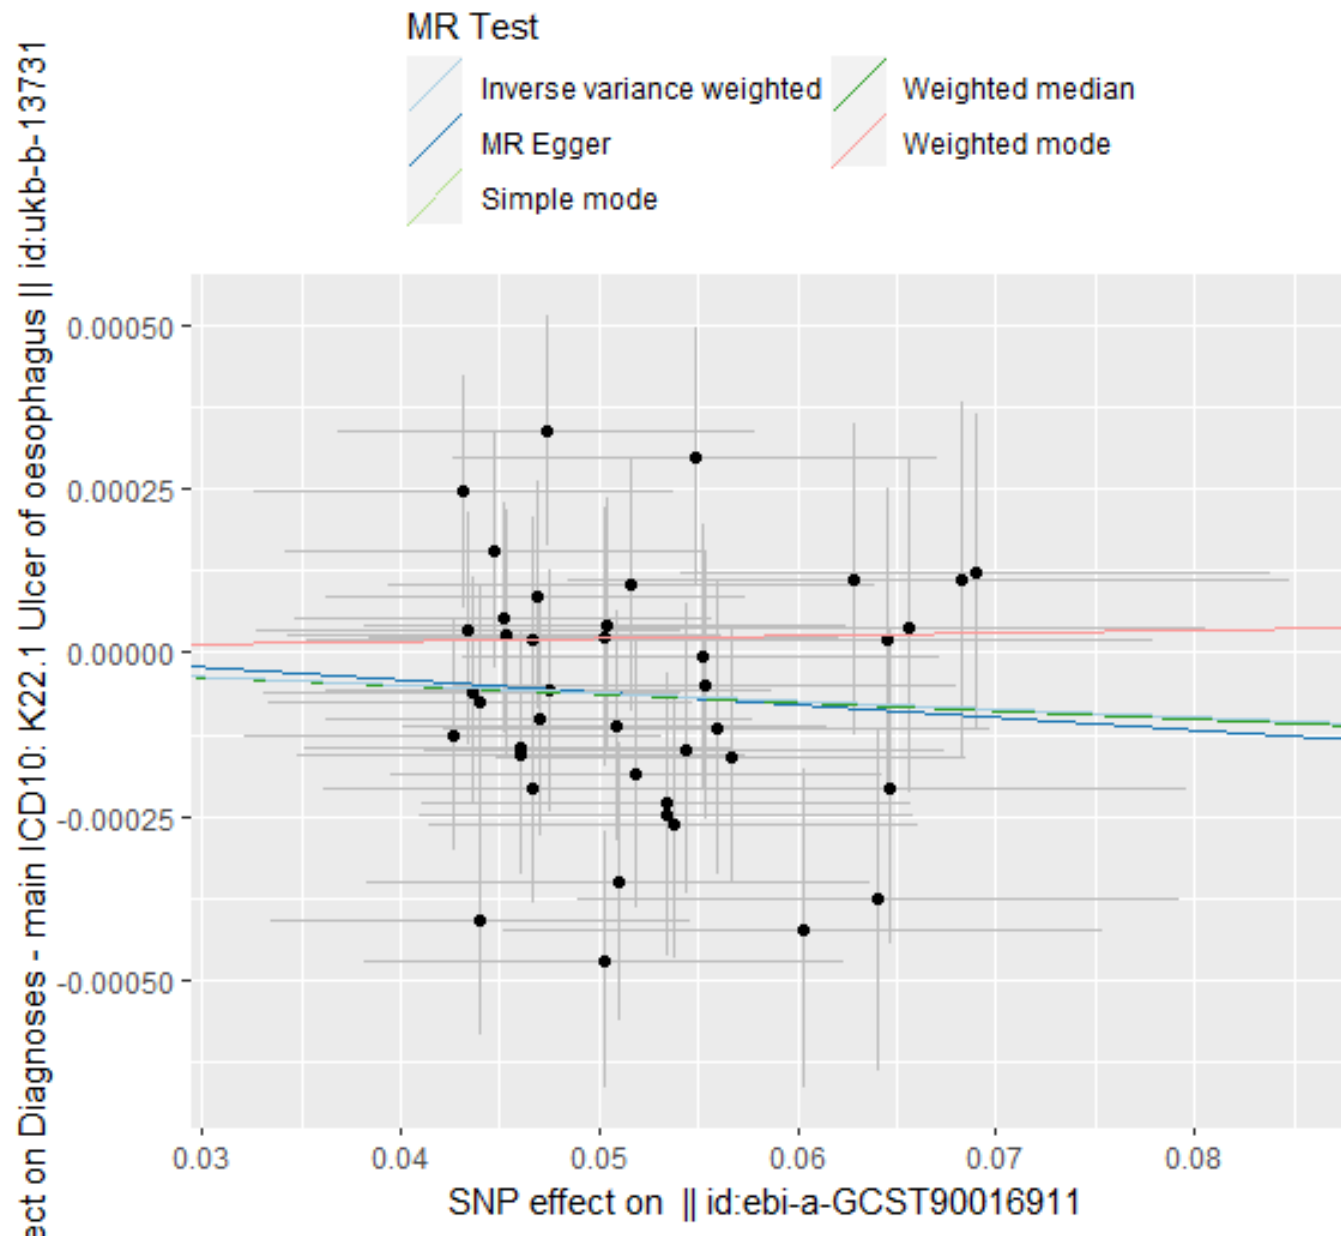

**Figure 26** Leave-one-out analysis, funnel plot, MR effect size and scatter plot for gut microbiota abundance (family Peptostreptococcaceae id.2042) on ulcer of oesophagus

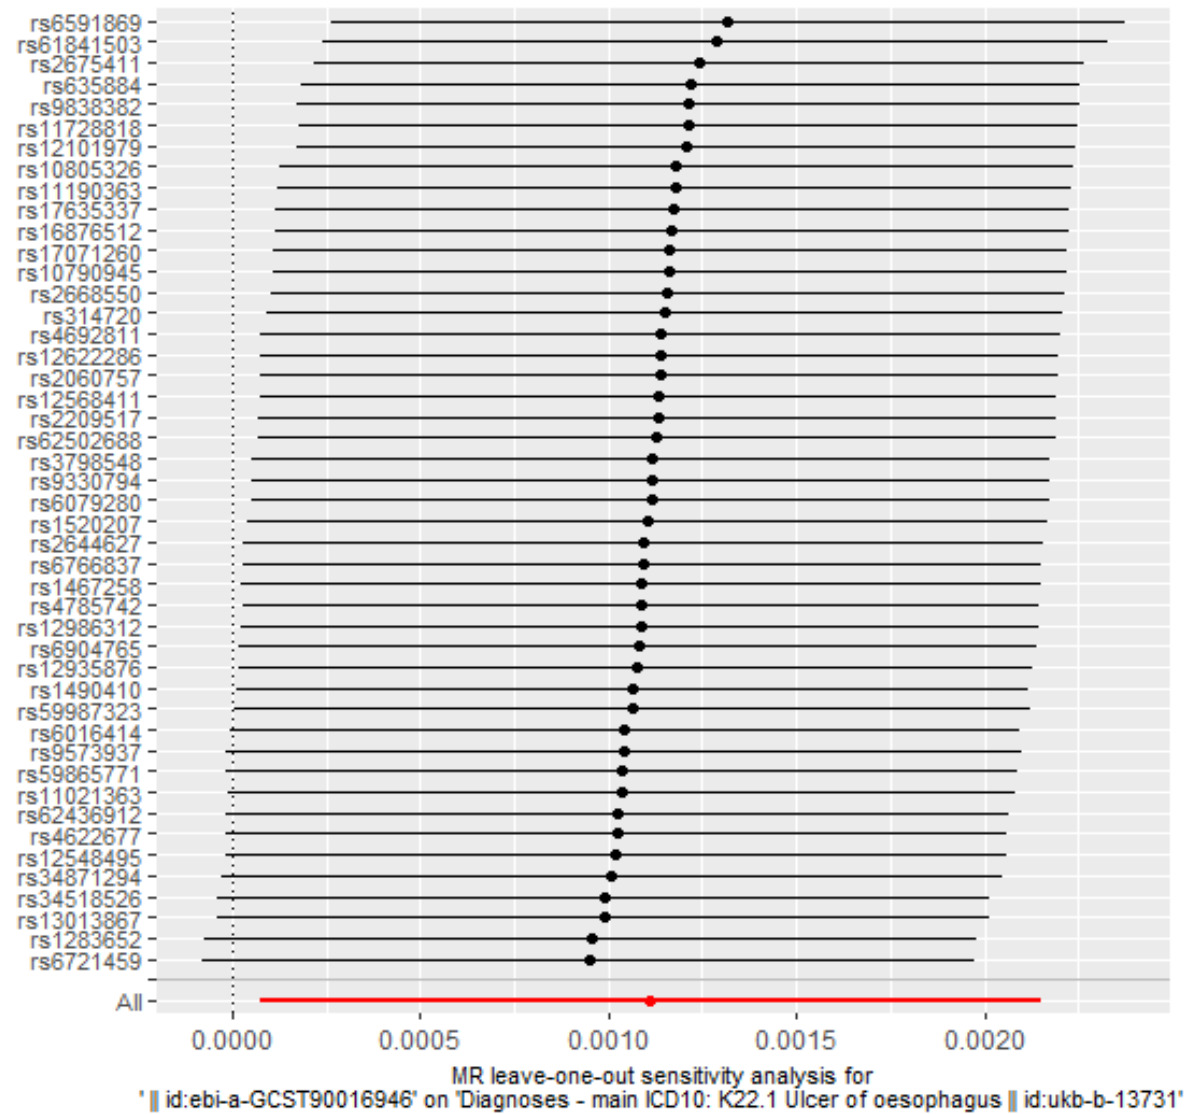

MR Method

- Inverse variance weighted
- MR Egger

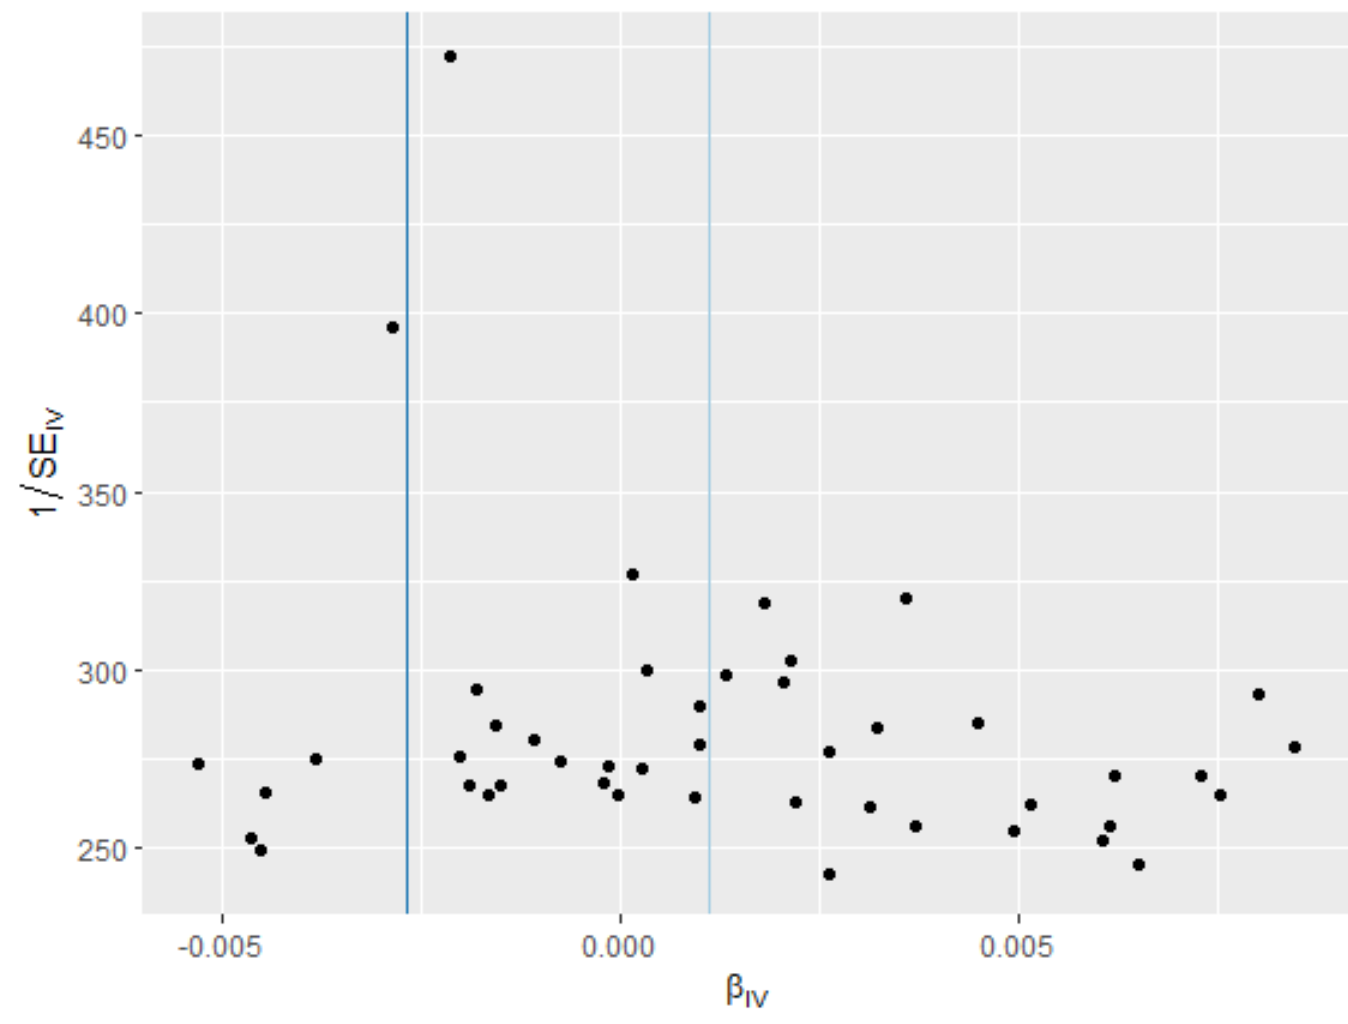

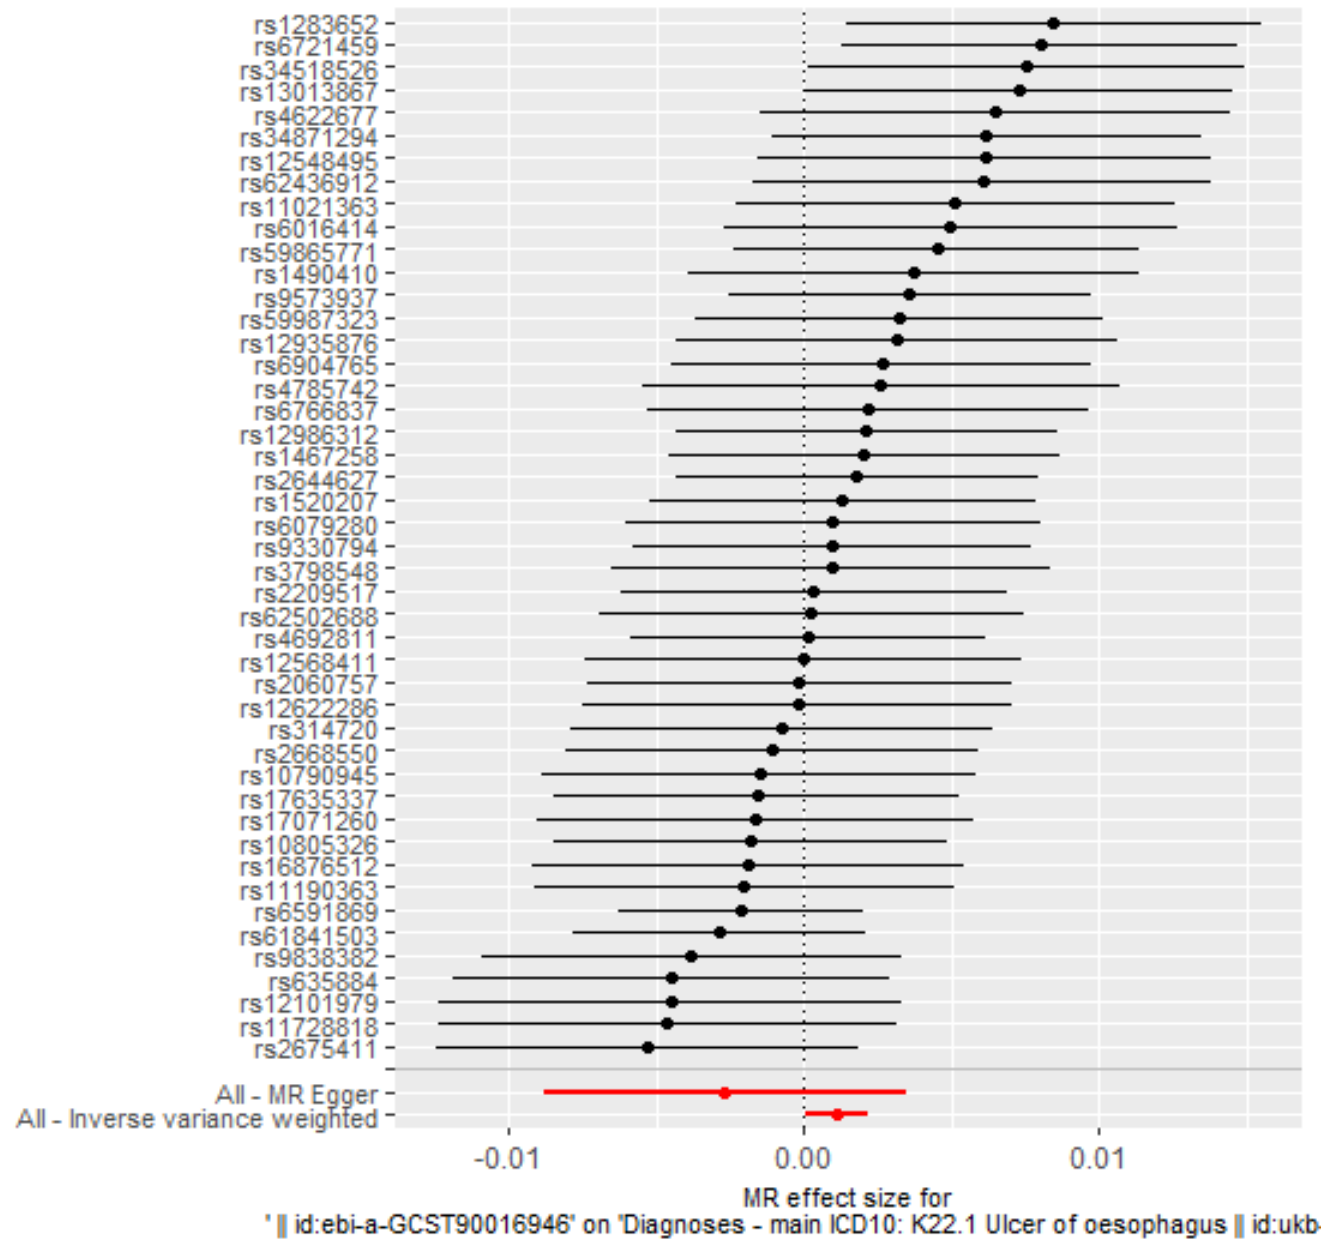

Effect on Diagnoses - main ICD10: K22.1 Ulcer of oesophagus || id:ukb-b-13731

### MR Test

- Inverse variance weighted
- MR Egger
- Simple mode
- Weighted median
- Weighted mode

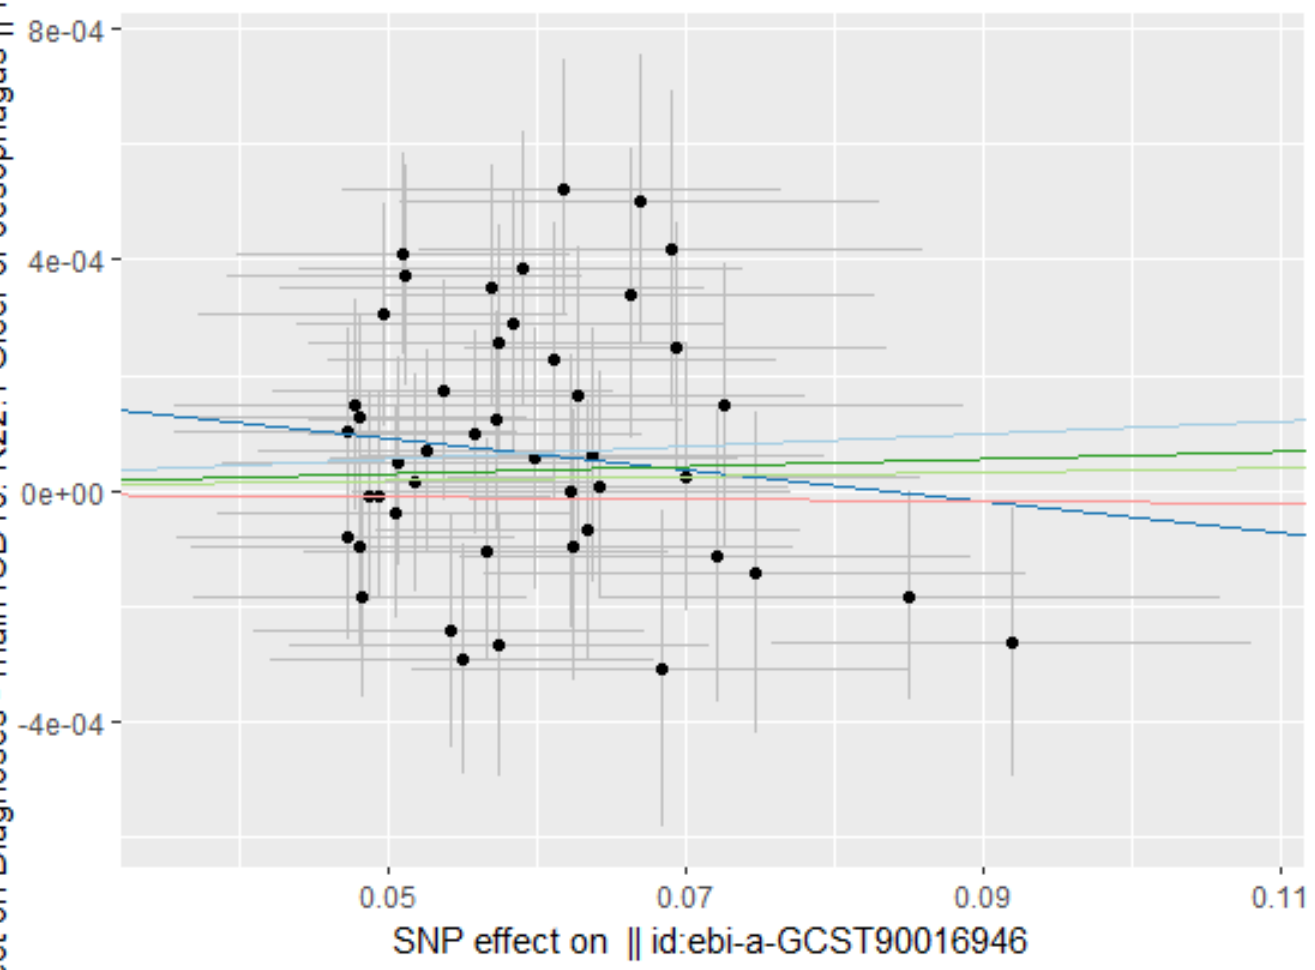



**Figure 27** Leave-one-out analysis, funnel plot, MR effect size and scatter plot for gut microbiota abundance (family Rhodospirillaceae id.2717) on ulcer of oesophagus

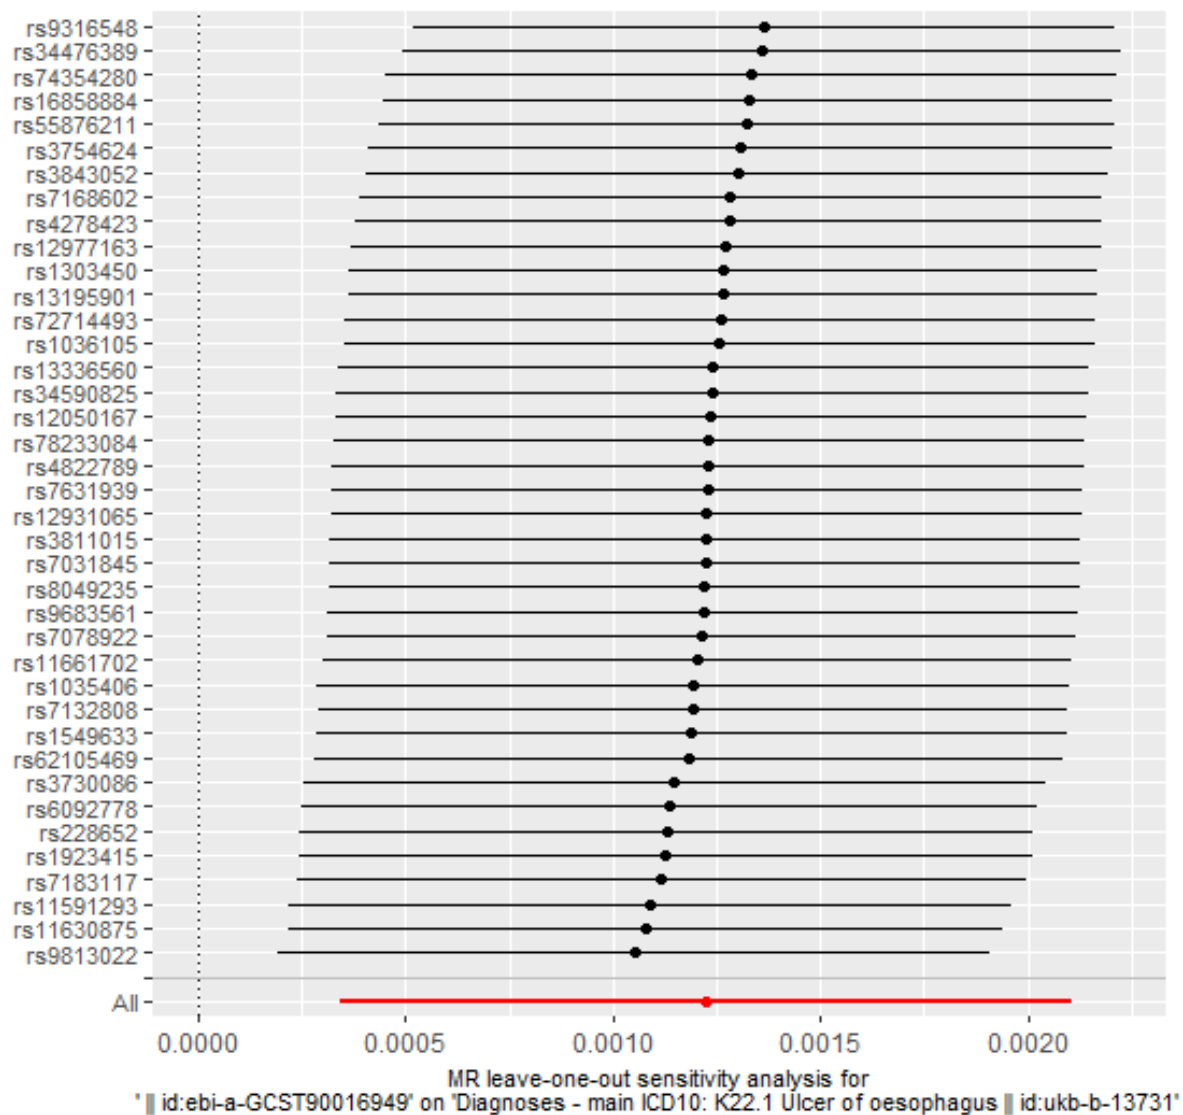

MR Method

- Inverse variance weighted
- MR Egger

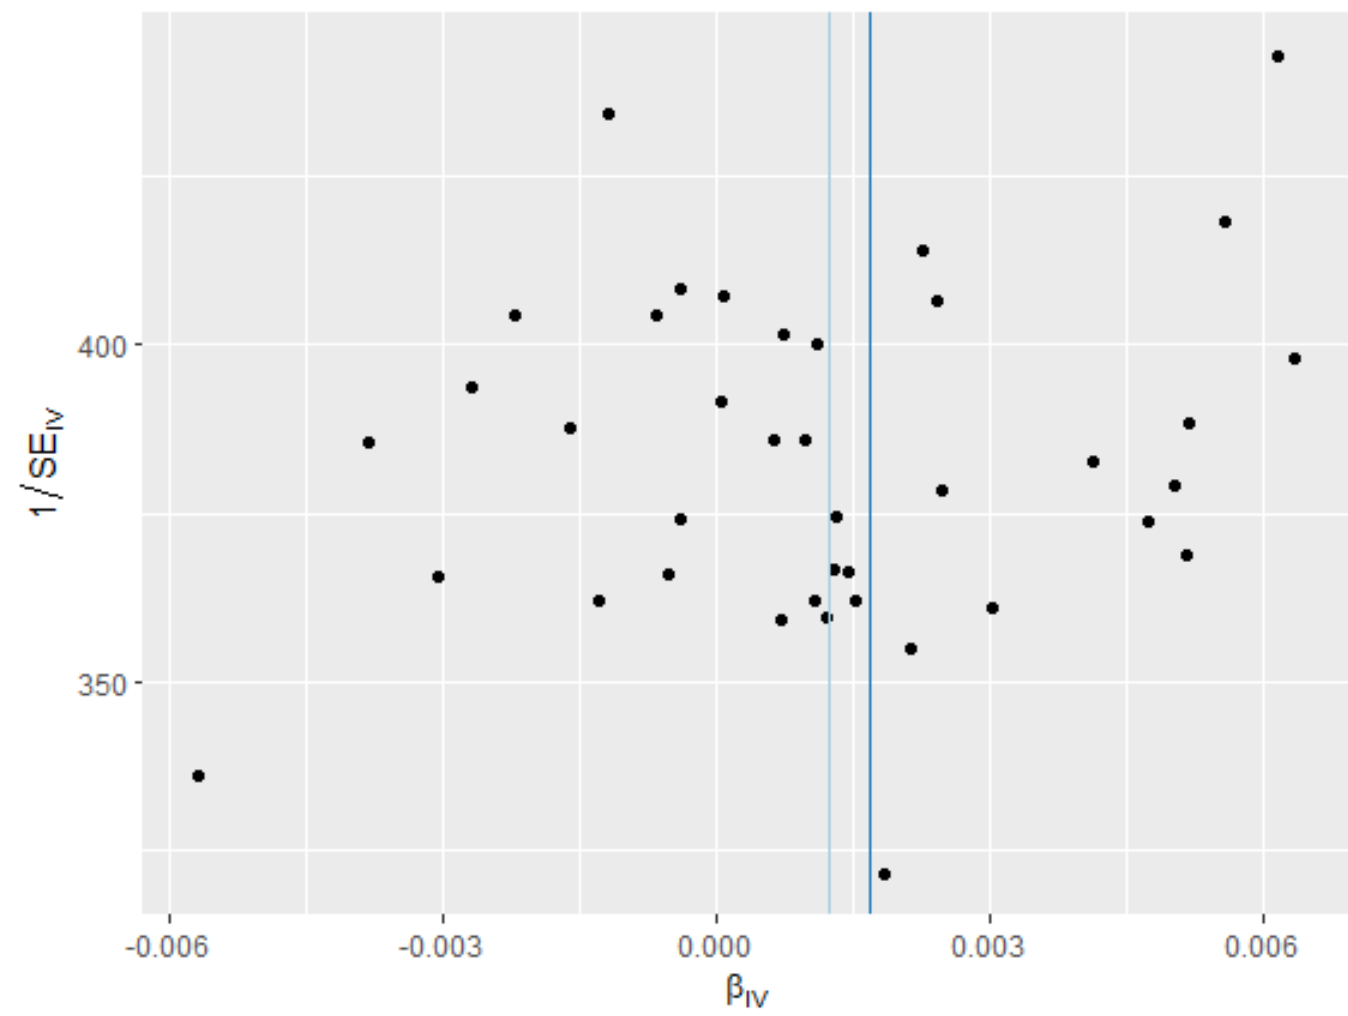

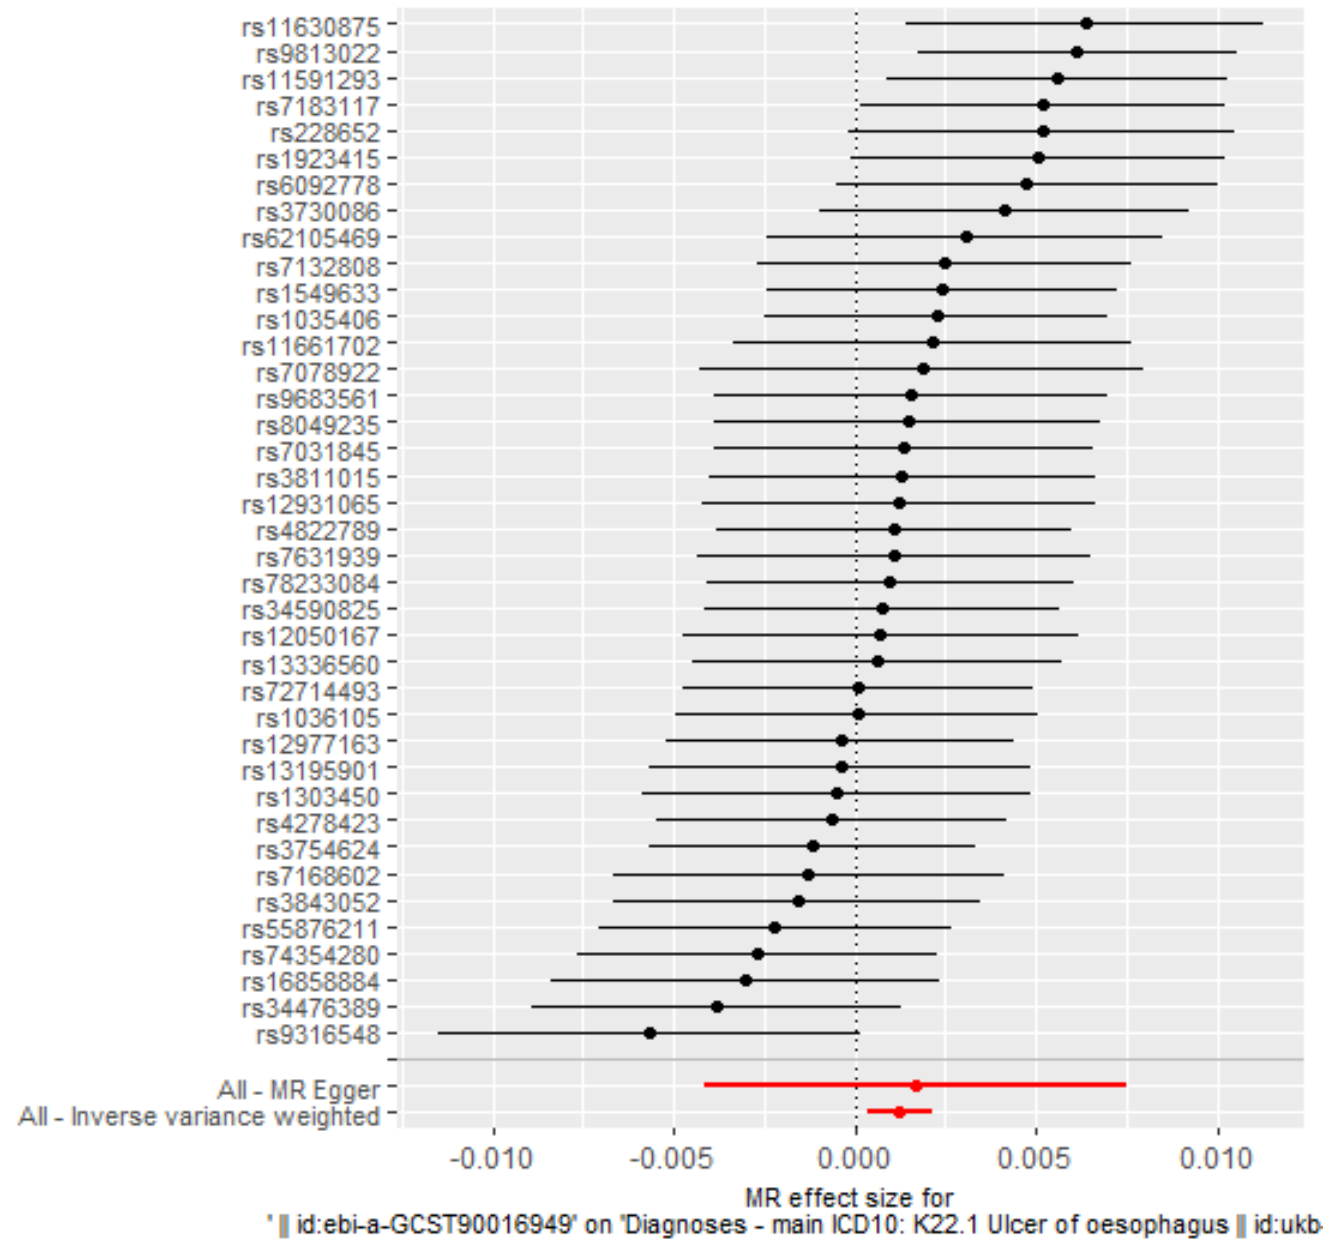

Effect on Diagnoses - main ICD10: K22.1 Ulcer of oesophagus || id:ukb-b-13731

### MR Test

- Inverse variance weighted
- MR Egger
- Simple mode
- Weighted median
- Weighted mode

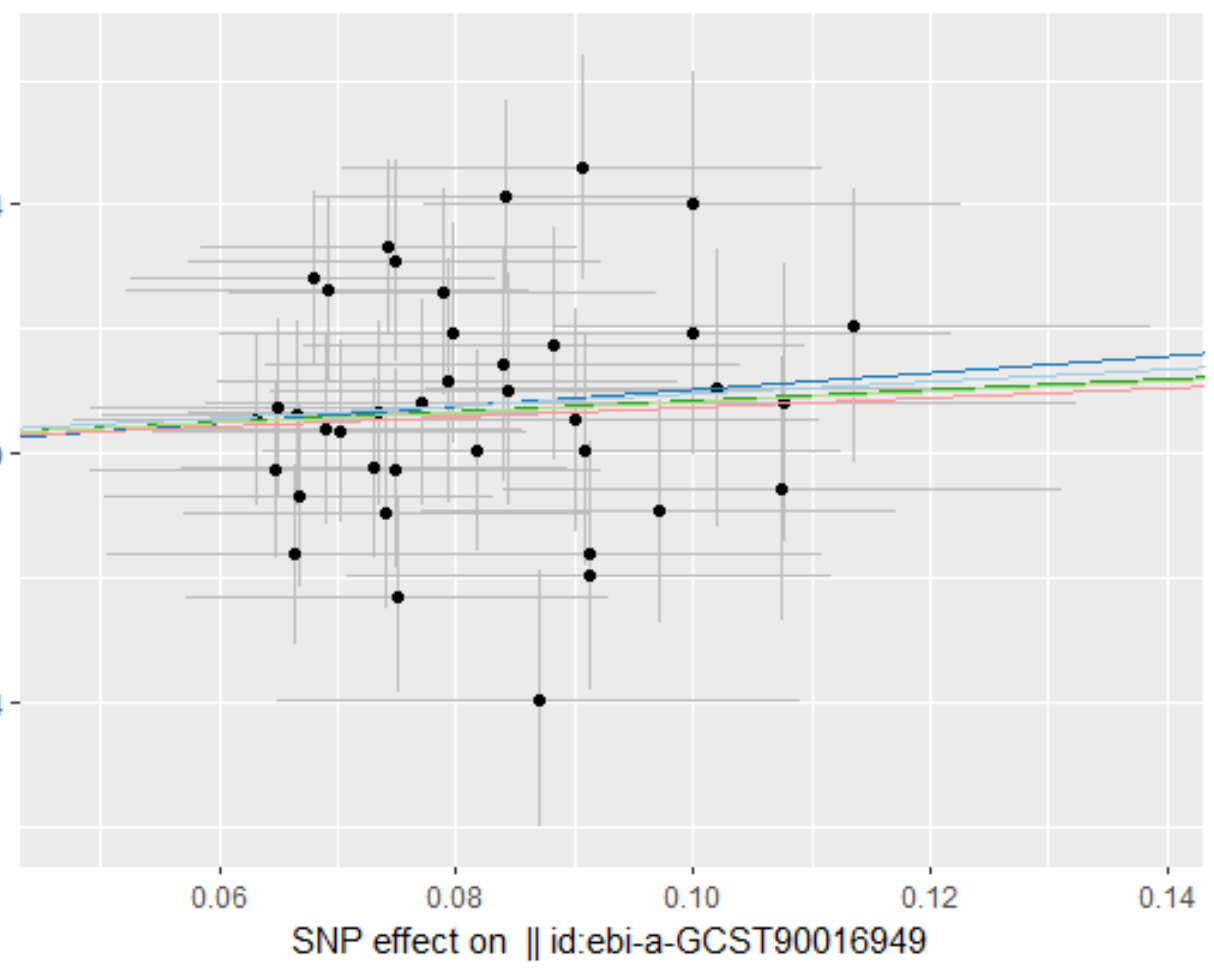

**Figure 28** Leave-one-out analysis, funnel plot, MR effect size and scatter plot for gut microbiota abundance (genus Erysipelatoclostridium id.11381) on ulcer of oesophagus

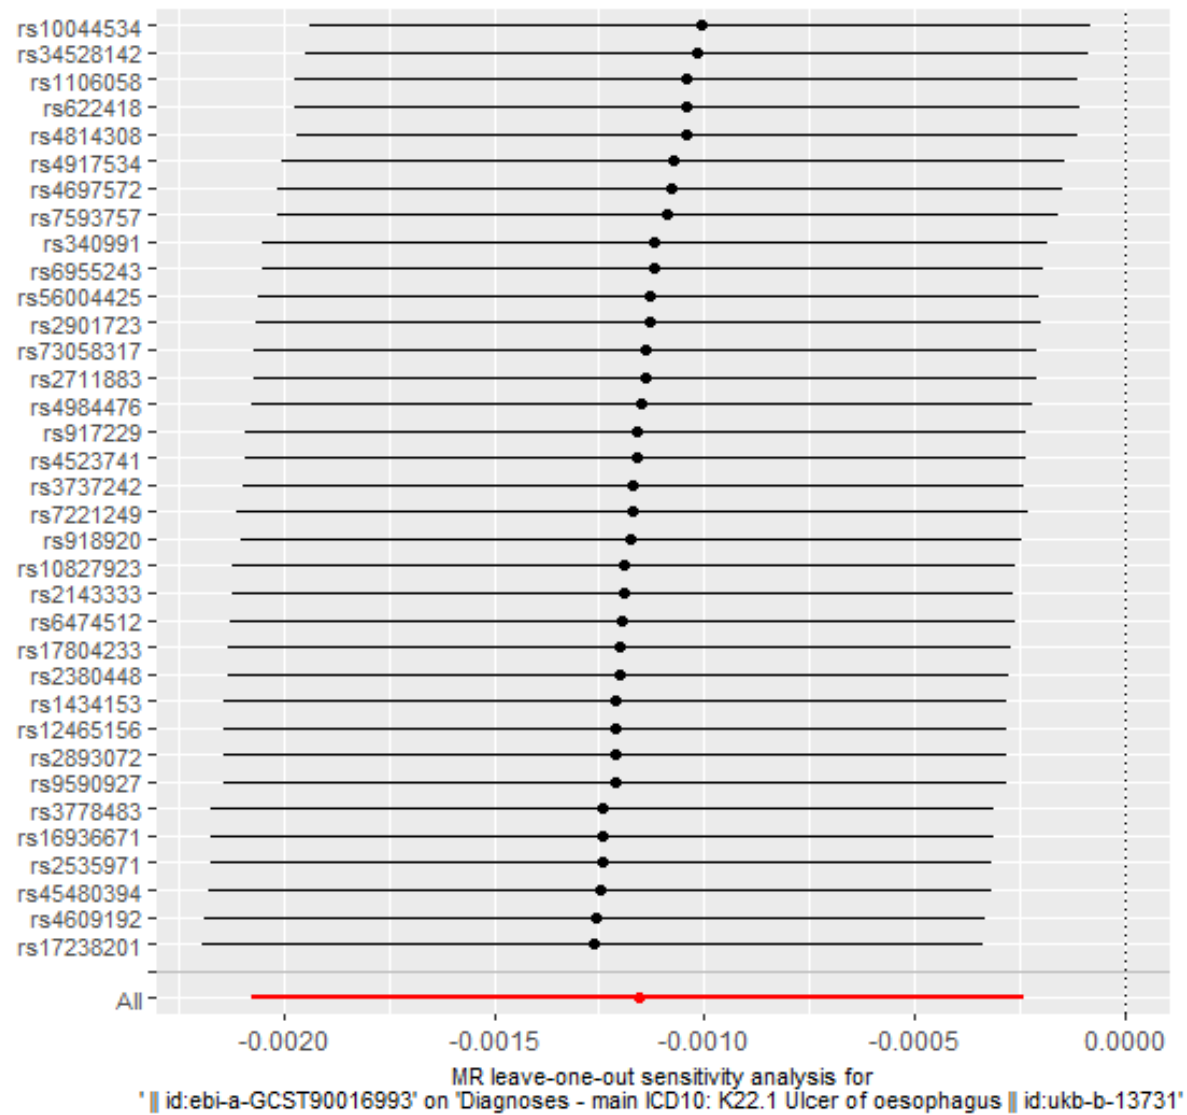

MR Method

- Inverse variance weighted
- MR Egger

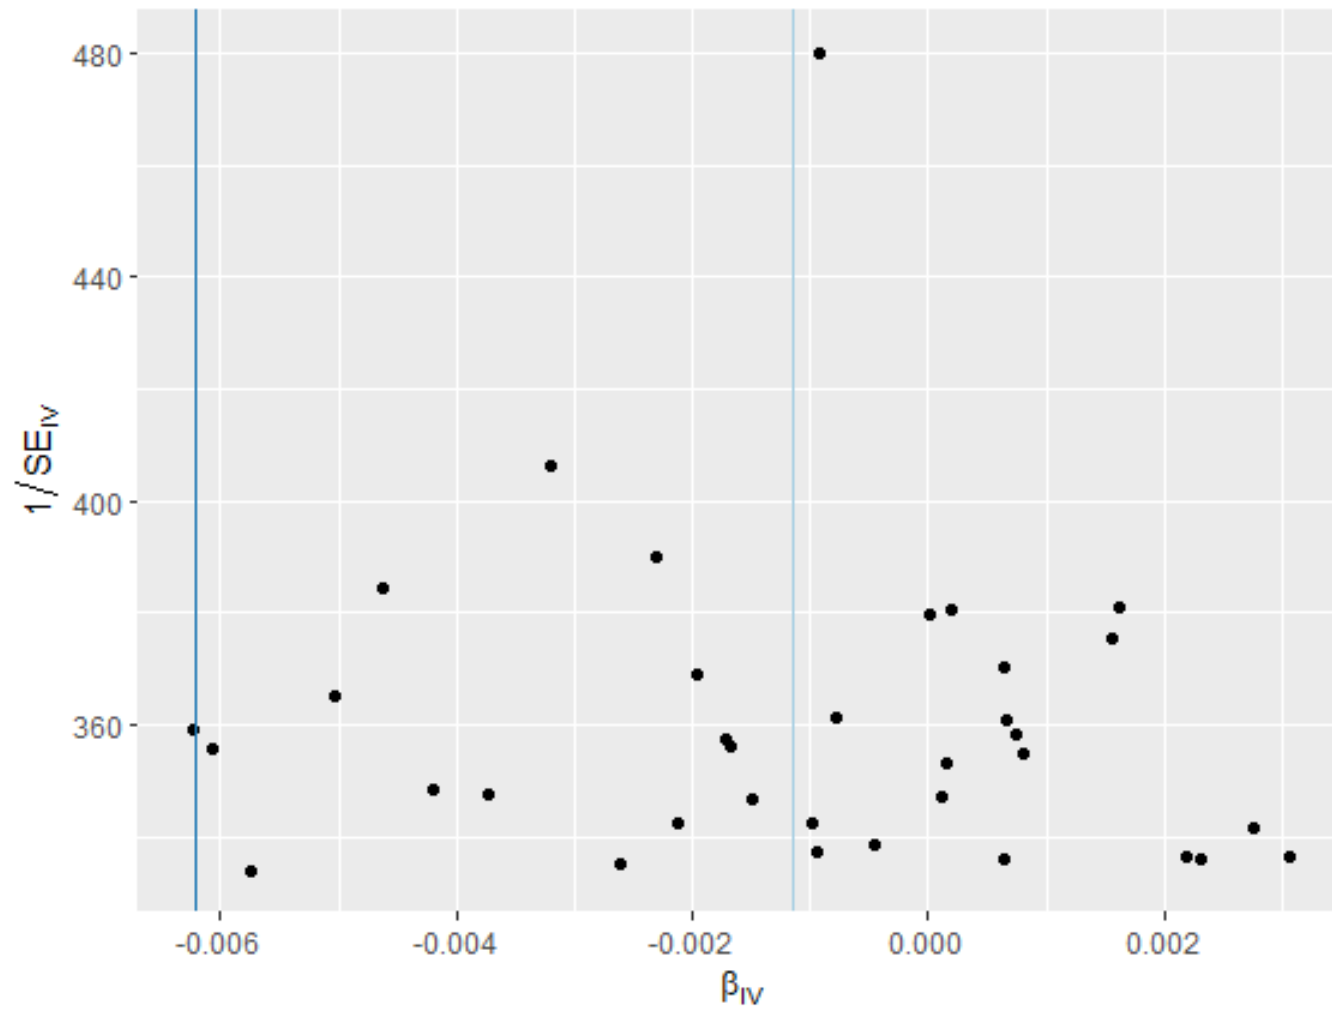

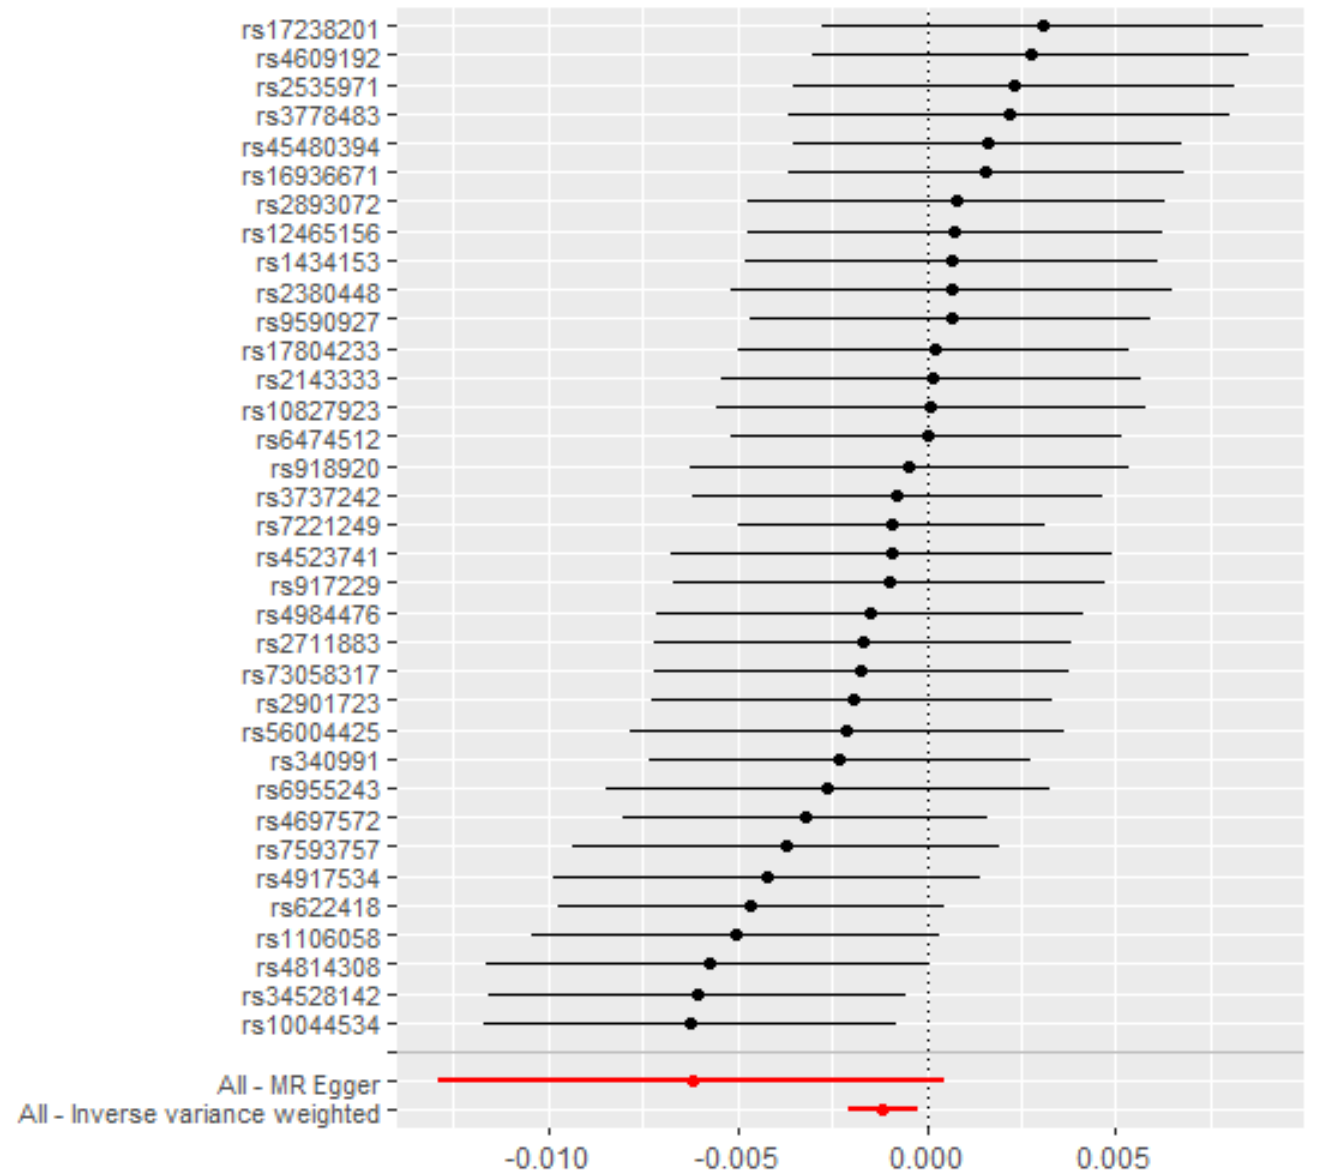

MR effect size for  
 ' || id:ebi-a-GCST90016993' on 'Diagnoses - main ICD10: K22.1 Ulcer of oesophagus || id:ukb

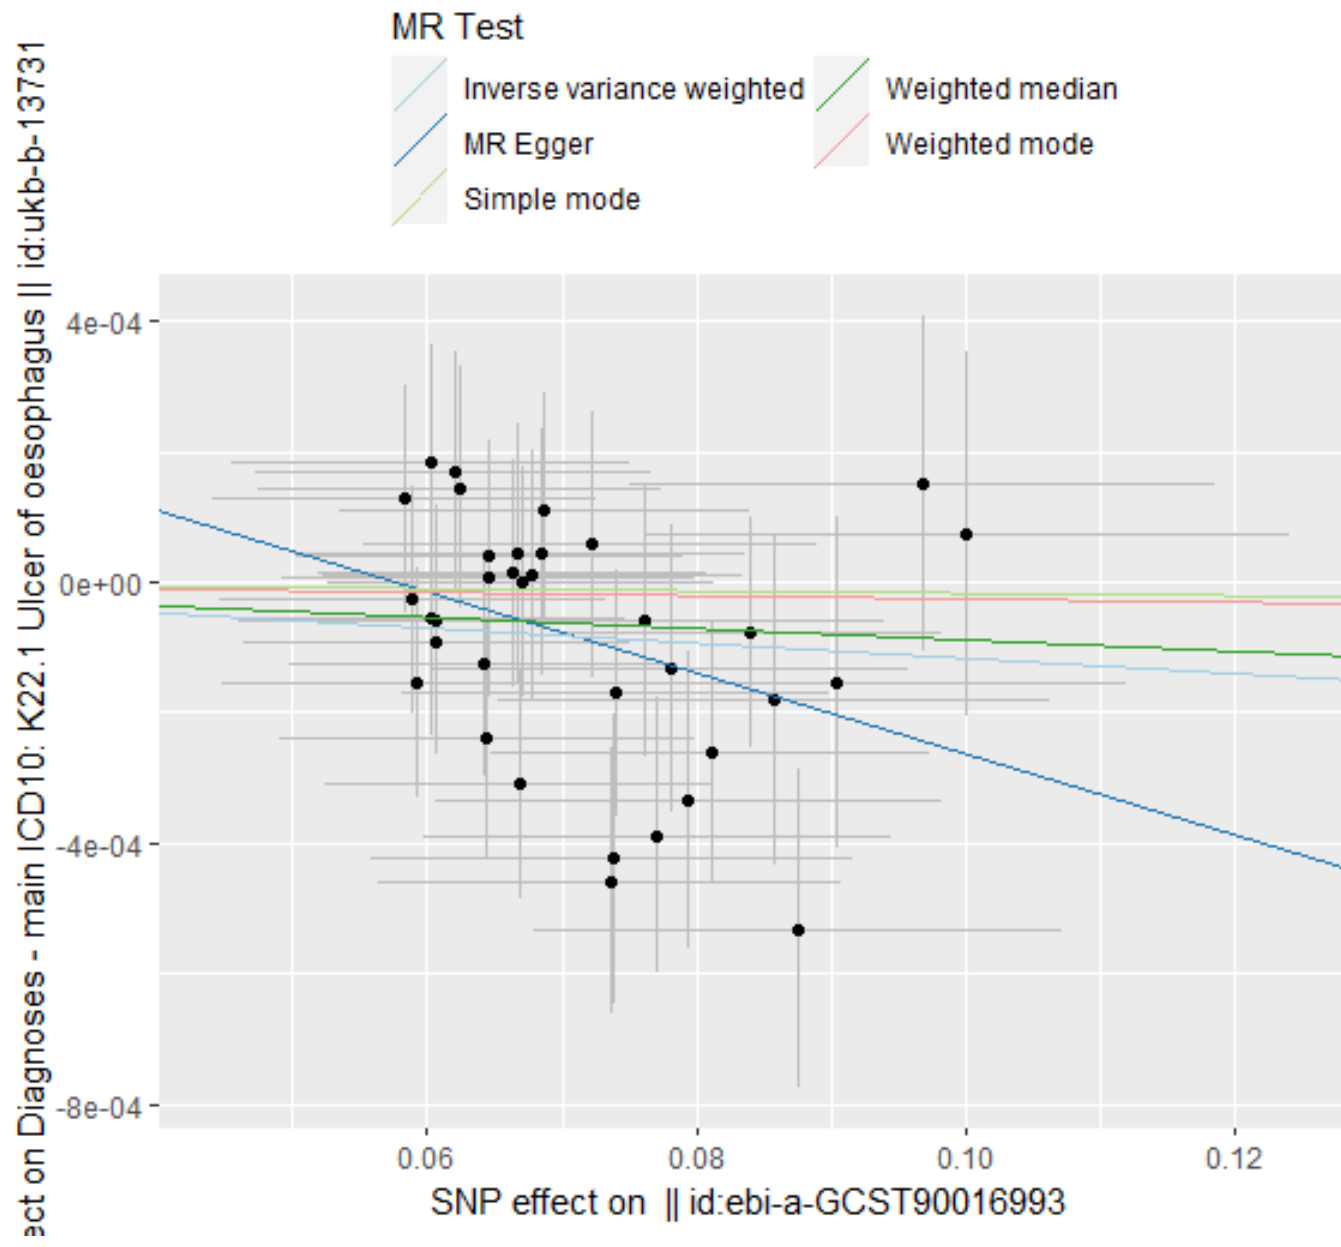



**Figure 29** Leave-one-out analysis, funnel plot, MR effect size and scatter plot for gut microbiota abundance (genus Family XIII AD3011 group id.11293) on ulcer of oesophagus

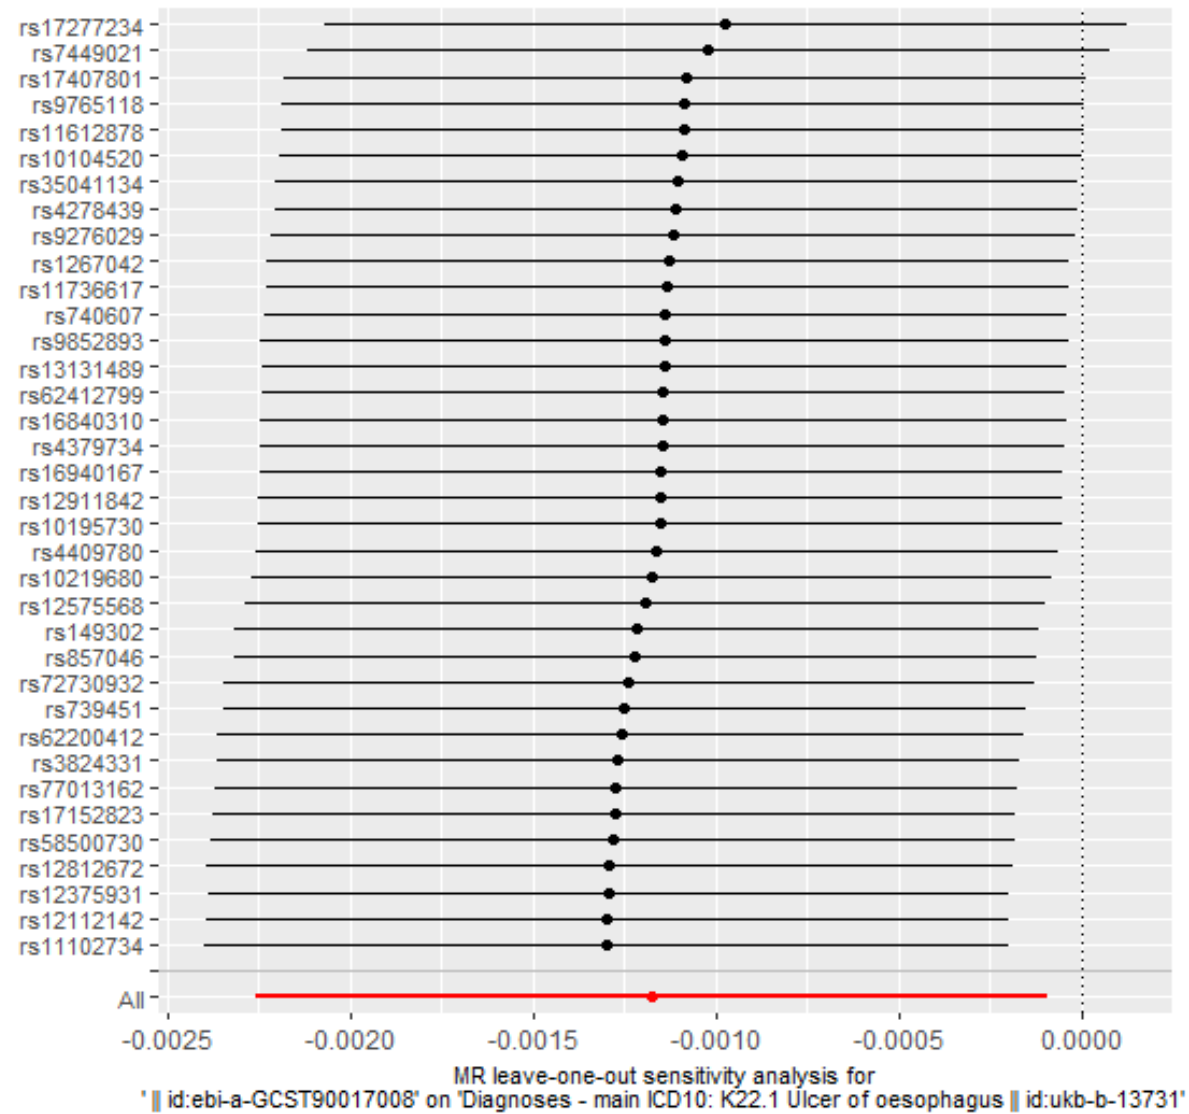

MR Method

- Inverse variance weighted
- MR Egger

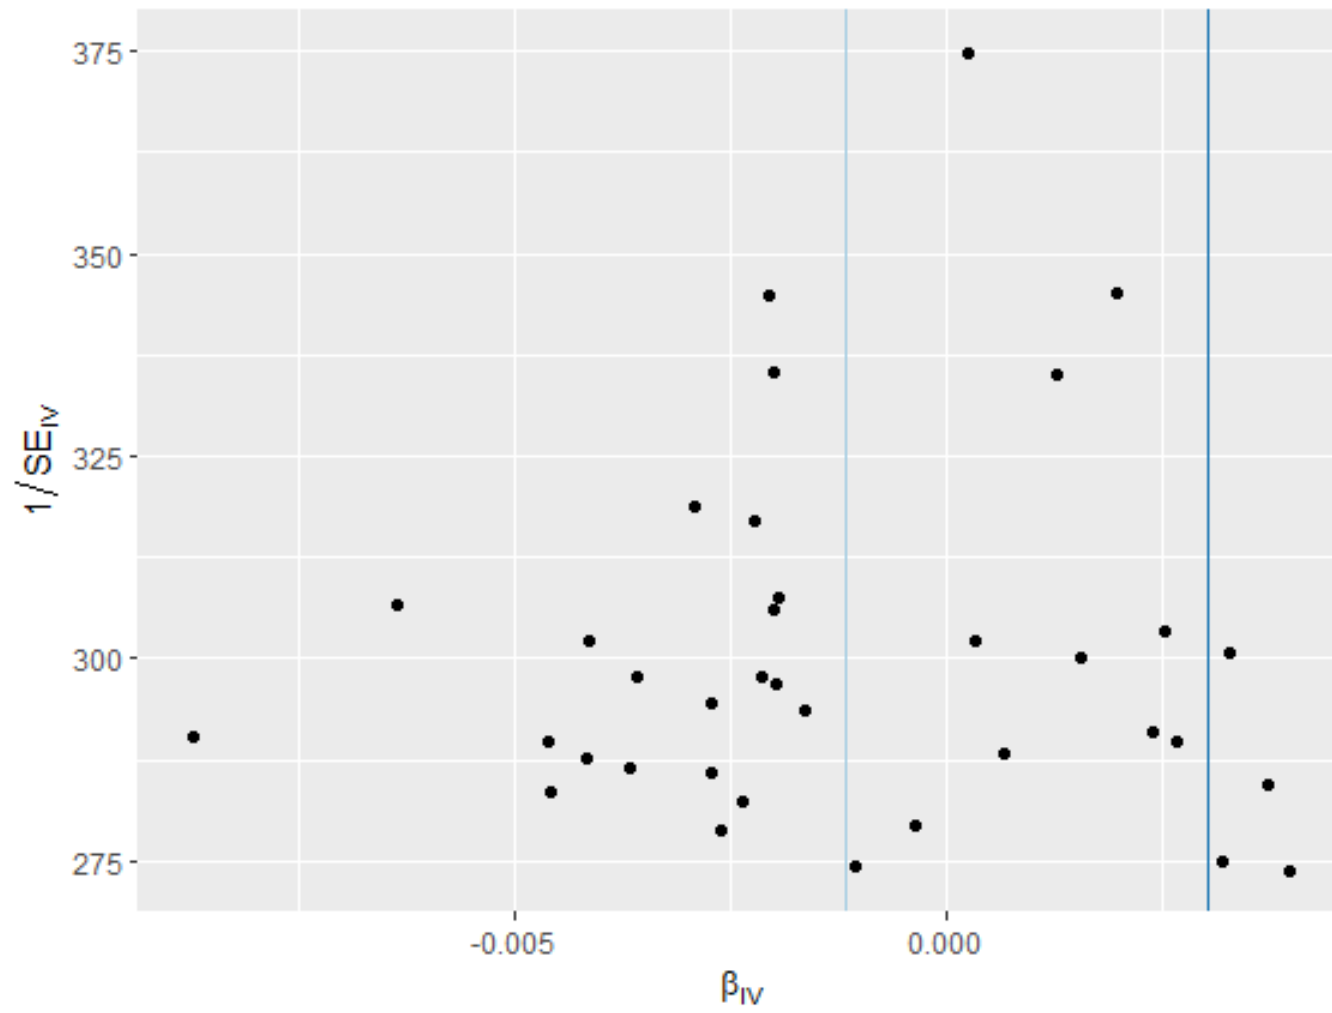

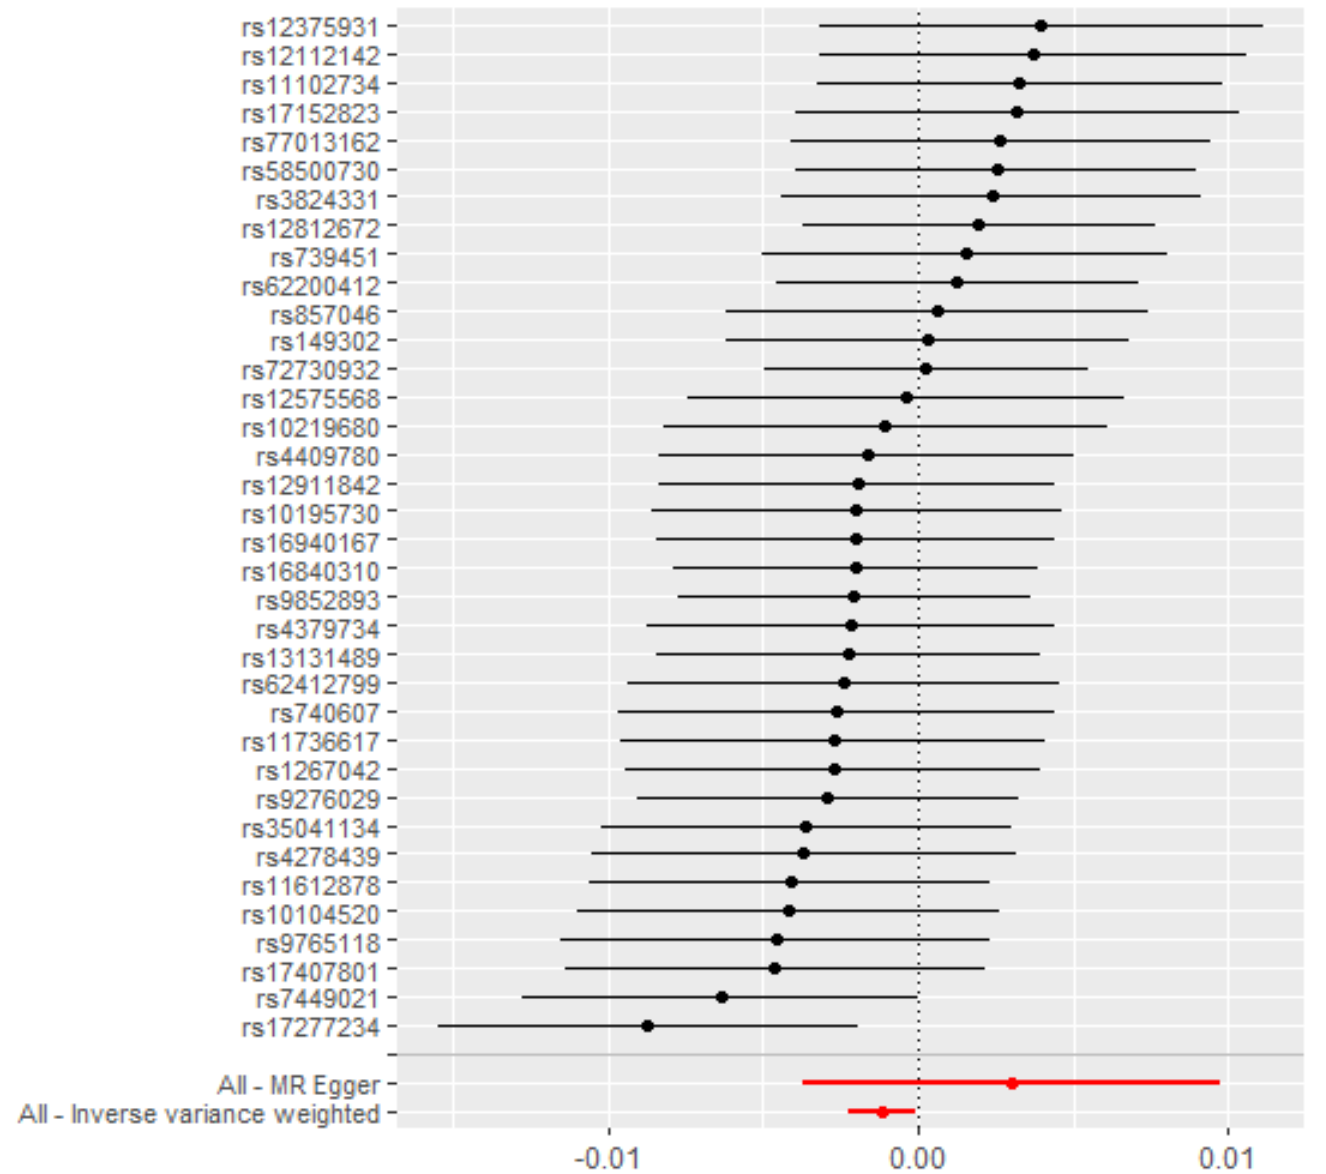

MR effect size for  
 ' || id:ebi-a-GCST90017008' on 'Diagnoses - main ICD10: K22.1 Ulcer of oesophagus || id:ukb

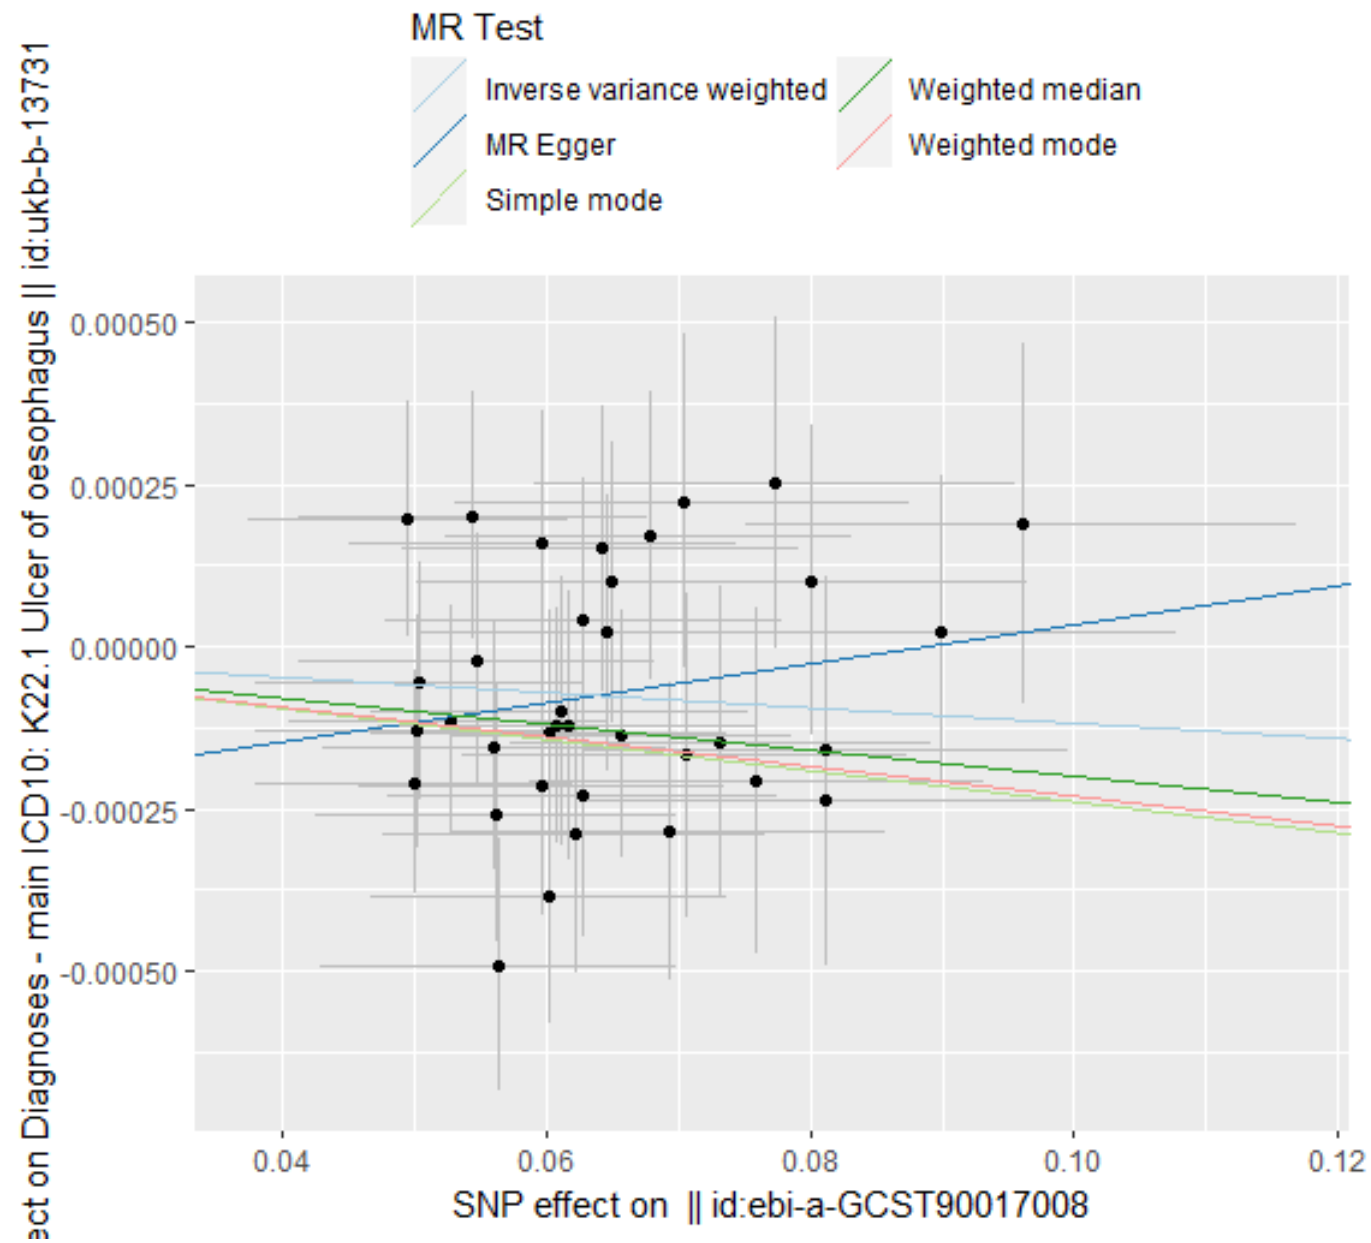

**Figure 30** Leave-one-out analysis, funnel plot, MR effect size and scatter plot for gut microbiota abundance (genus *Gordonibacter* id.821) on ulcer of oesophagus

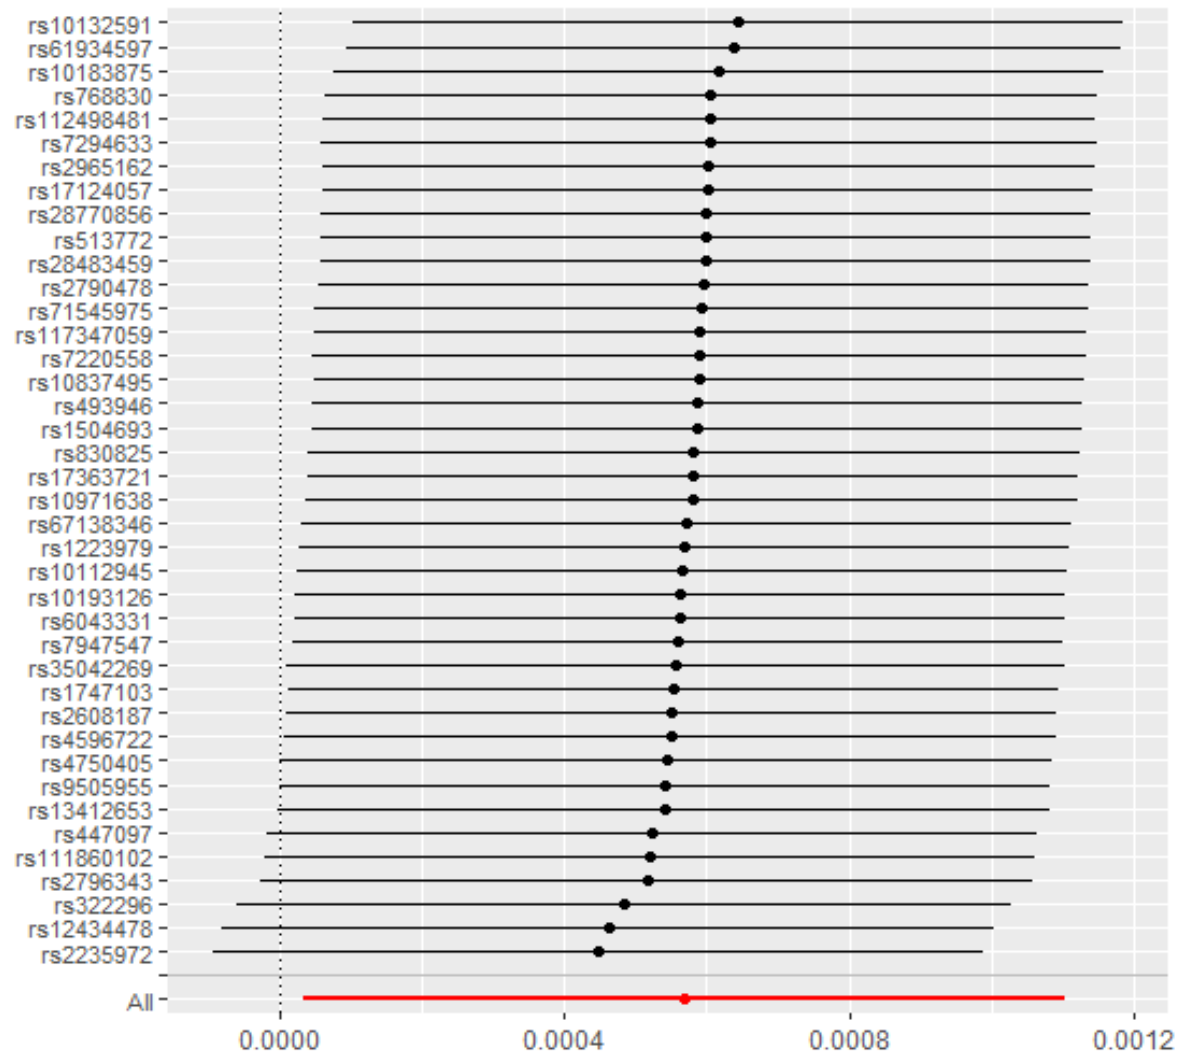

MR leave-one-out sensitivity analysis for  
\* || id:ebi-a-GCST90017012' on 'Diagnoses - main ICD10: K22.1 Ulcer of oesophagus || id:ukb-b-13731'

MR Method

- Inverse variance weighted
- MR Egger

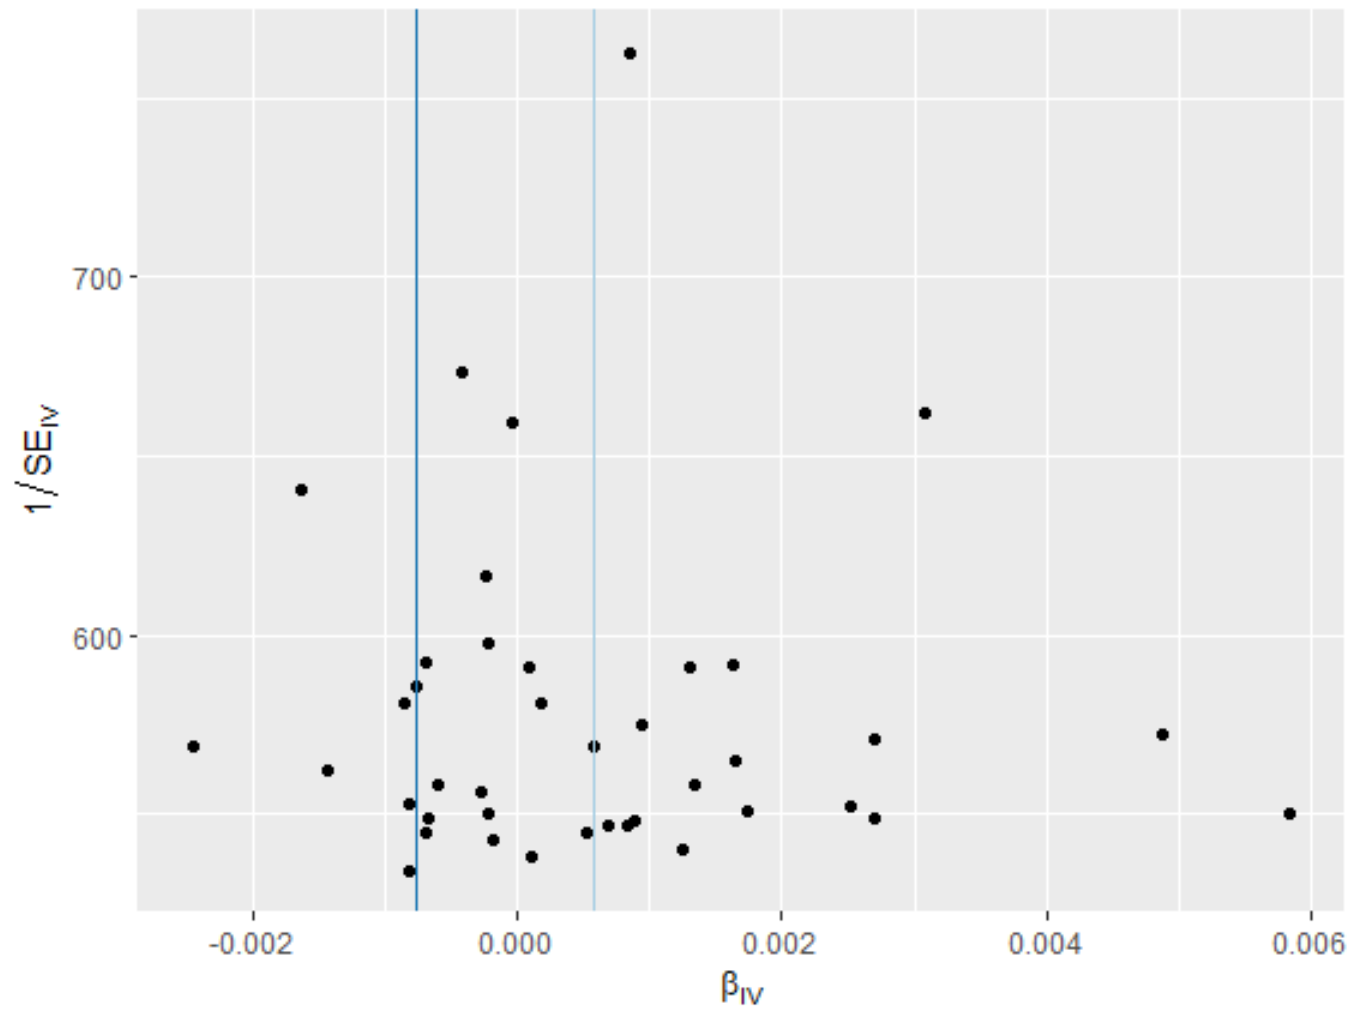

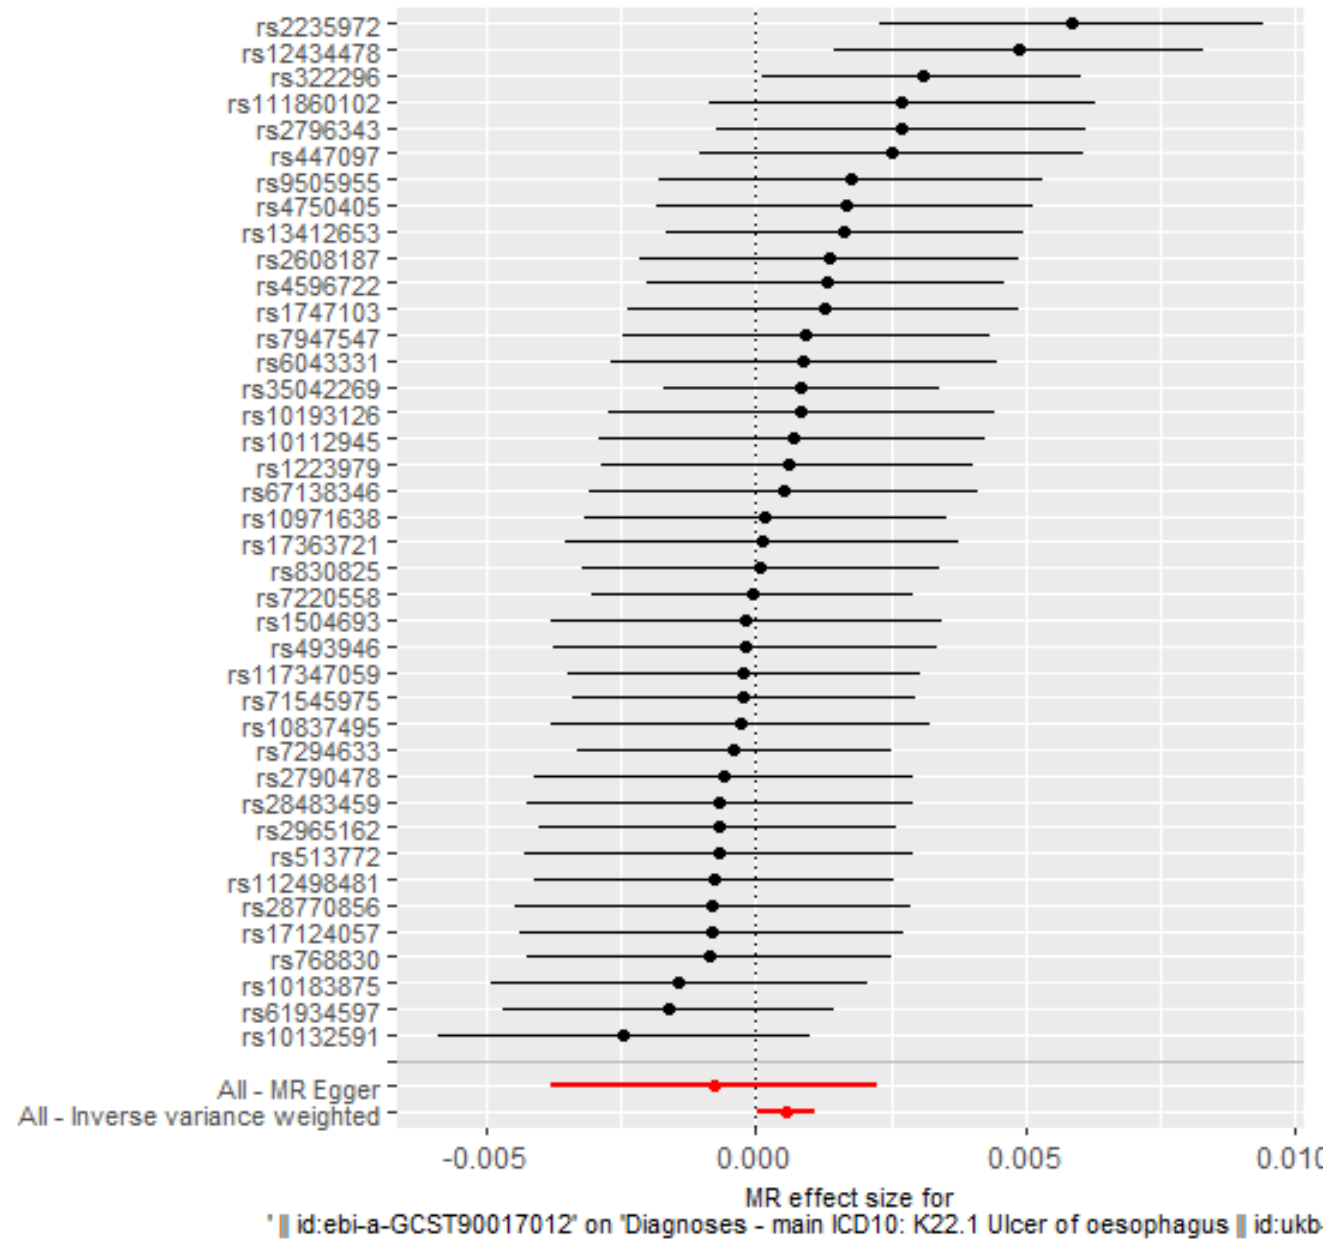

Effect on Diagnoses - main ICD10: K22.1 Ulcer of oesophagus || id:ukb-b-13731

### MR Test

- Inverse variance weighted
- MR Egger
- Simple mode
- Weighted median
- Weighted mode

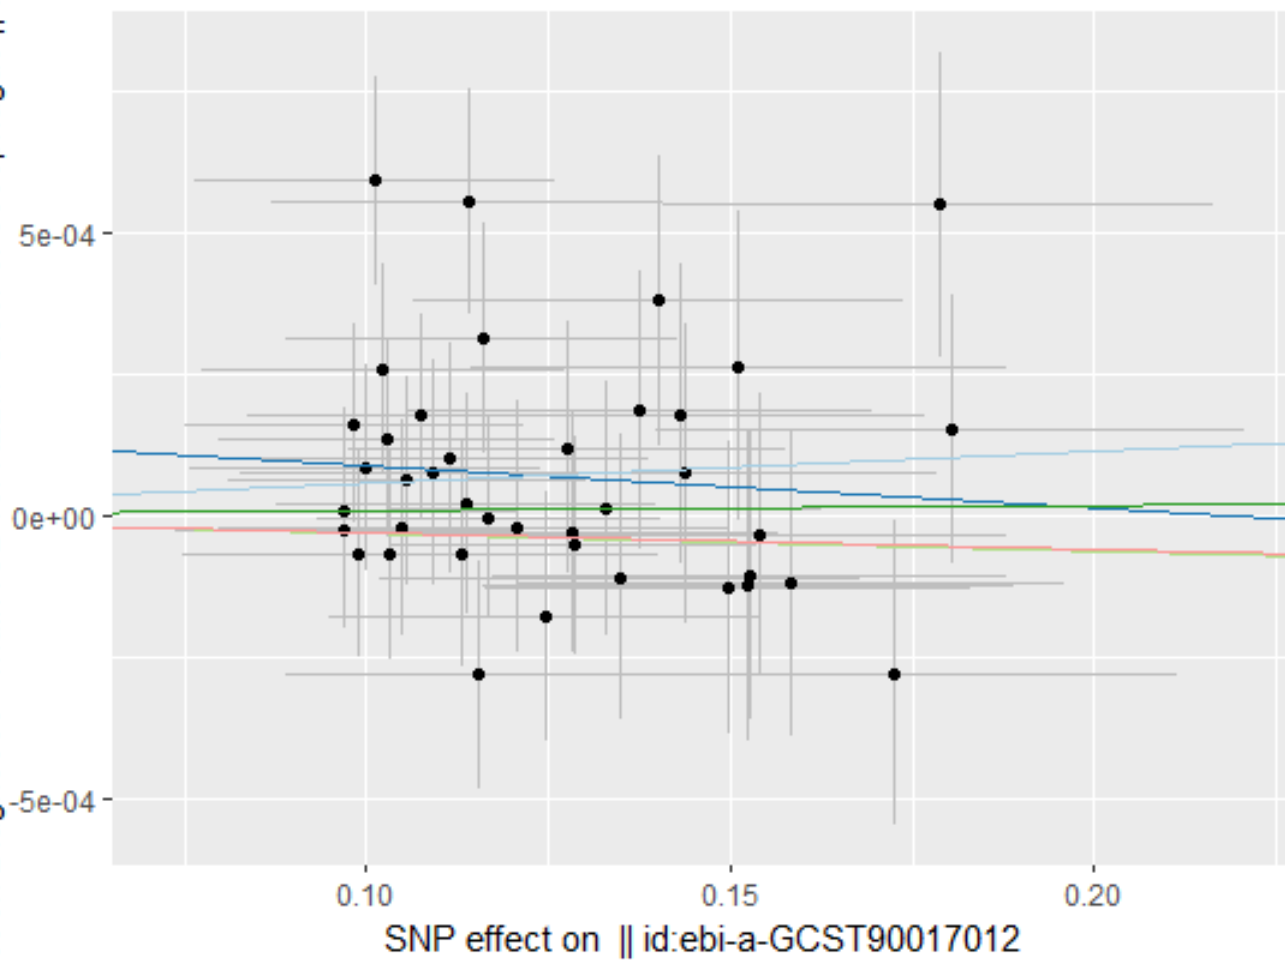



**Figure 31** Leave-one-out analysis, funnel plot, MR effect size and scatter plot for gut microbiota abundance (genus Slackia id.825) on ulcer of oesophagus

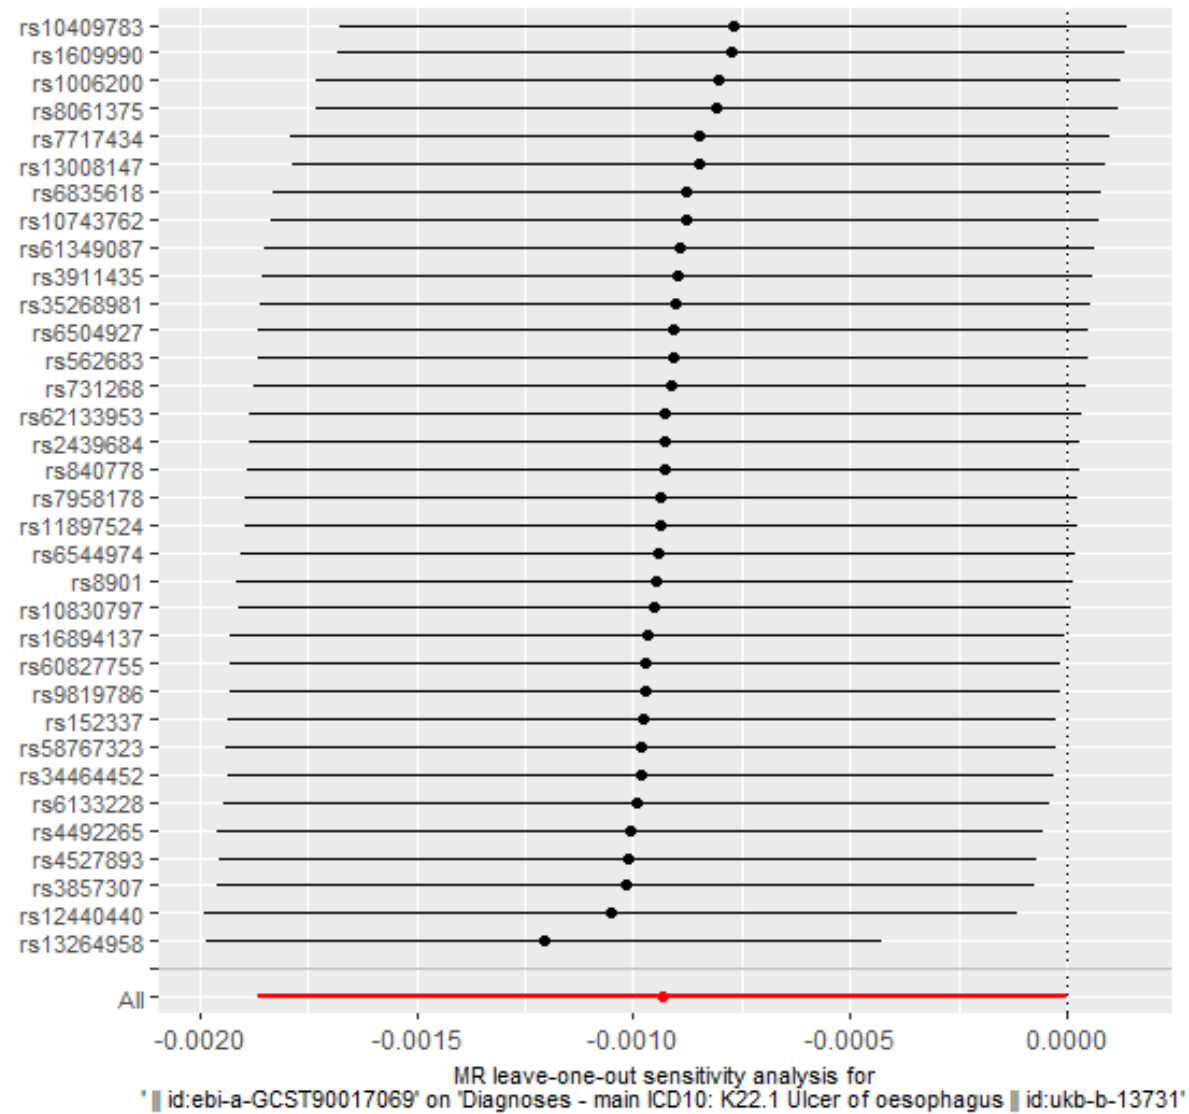

MR Method

- Inverse variance weighted
- MR Egger

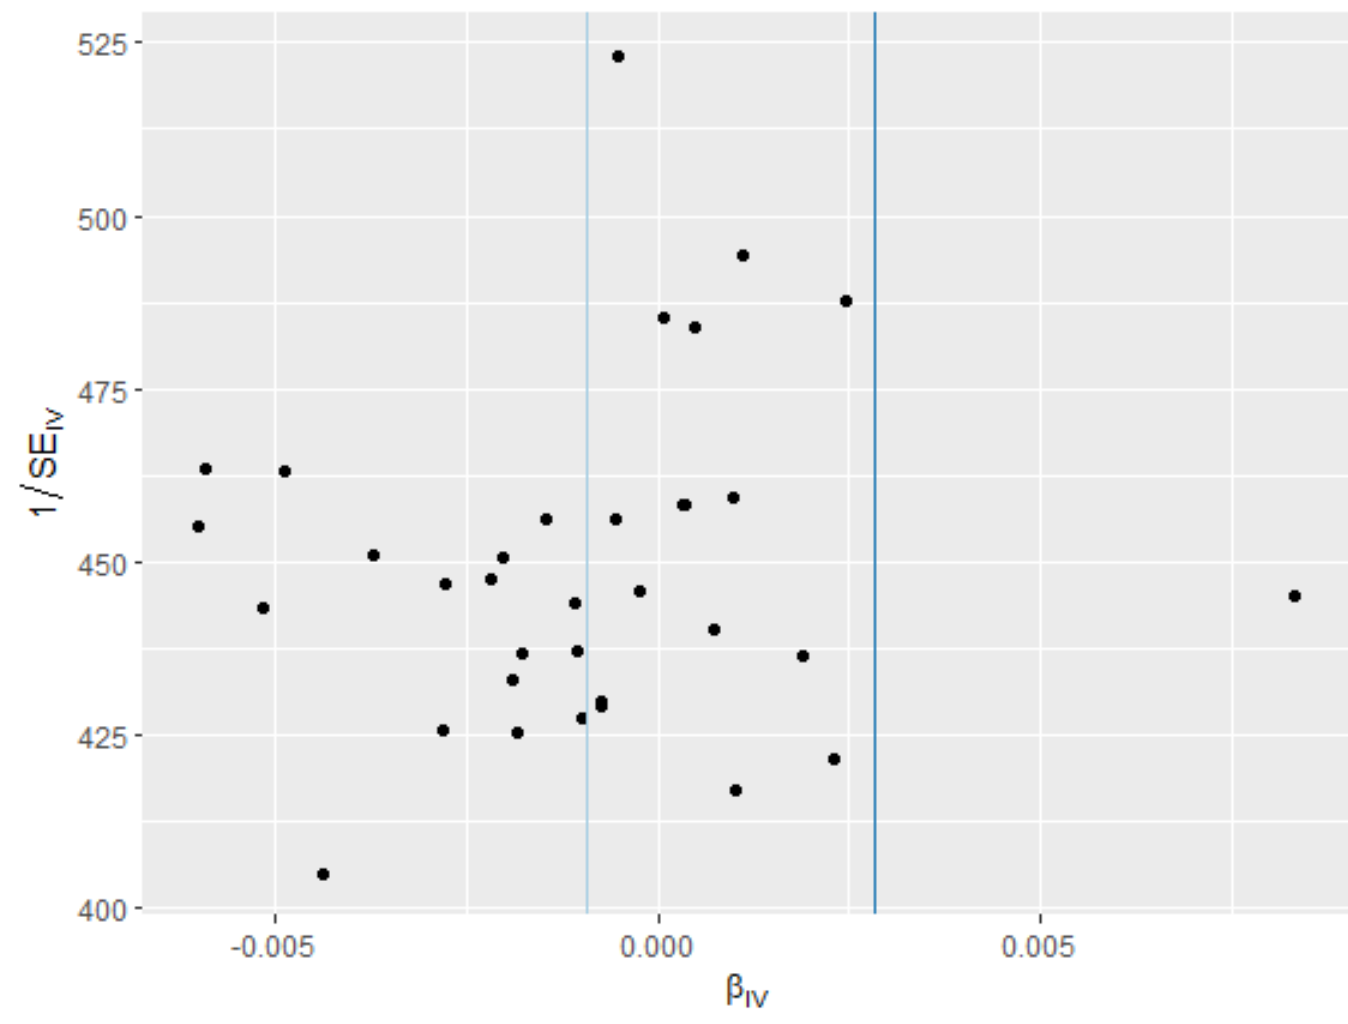

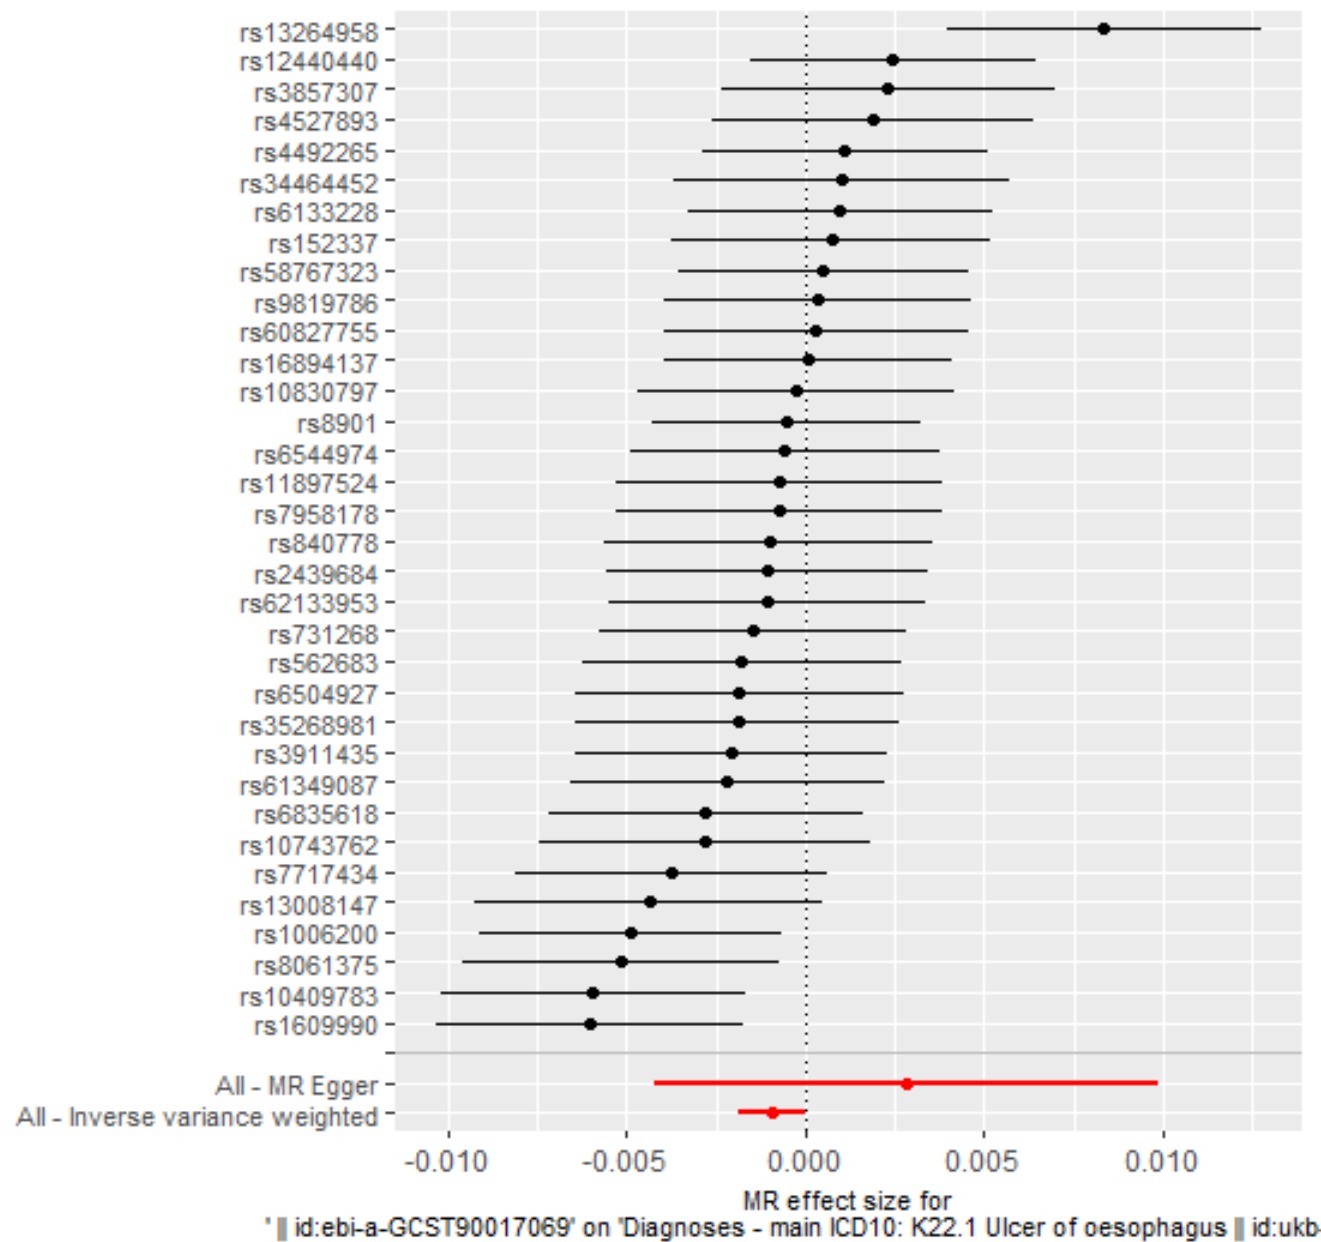

Effect on Diagnoses - main ICD10: K22.1 Ulcer of oesophagus || id:ukb-b-13731

### MR Test

- Inverse variance weighted
- MR Egger
- Simple mode
- Weighted median
- Weighted mode

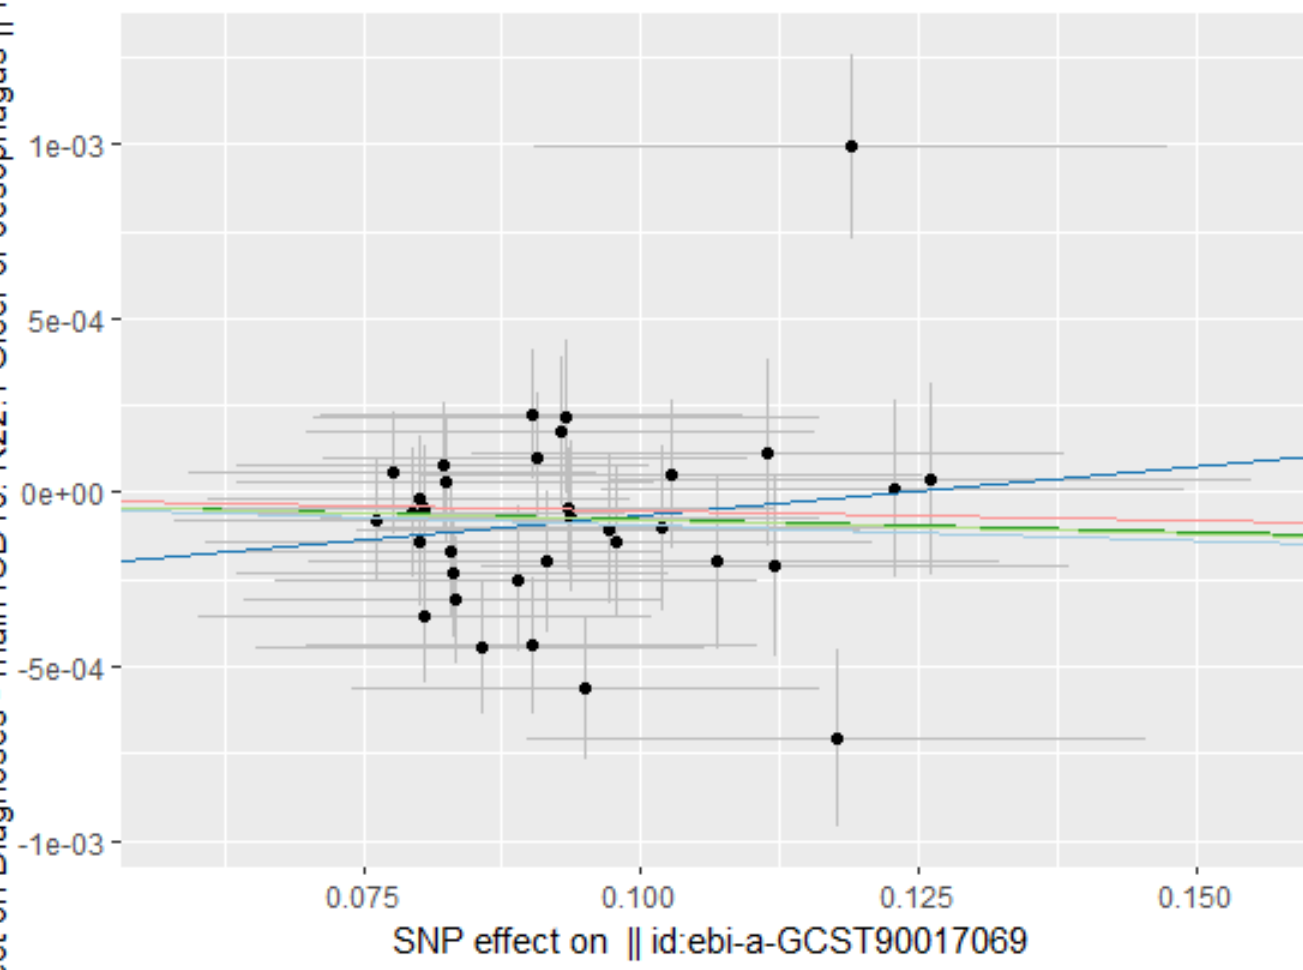

**Figure 32** Leave-one-out analysis, funnel plot, MR effect size and scatter plot for gut microbiota abundance (genus Terrisporobacter id.11348) on ulcer of oesophagus

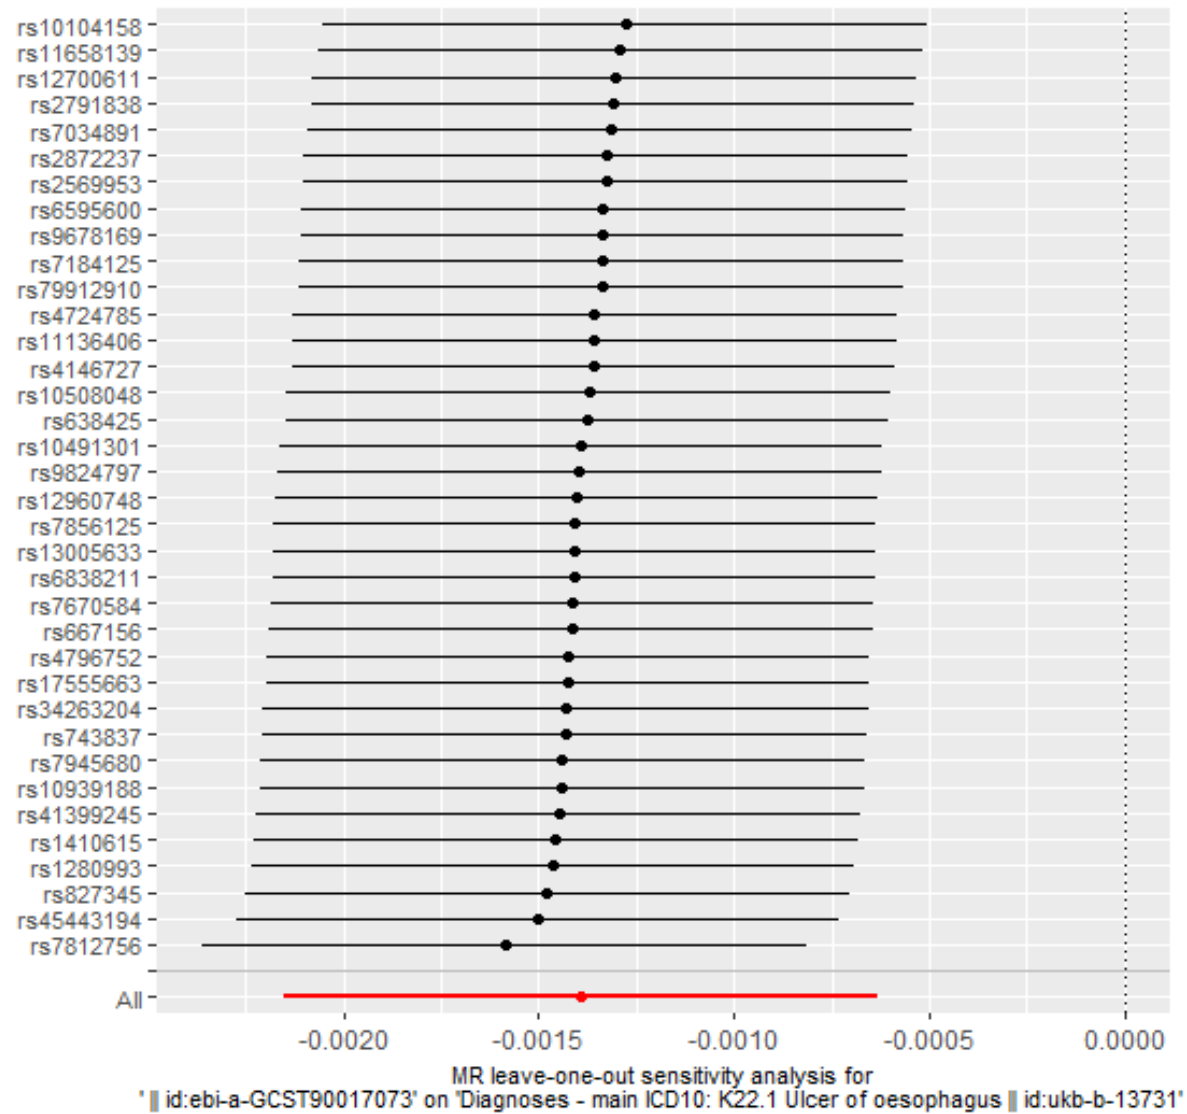

MR Method

- Inverse variance weighted
- MR Egger

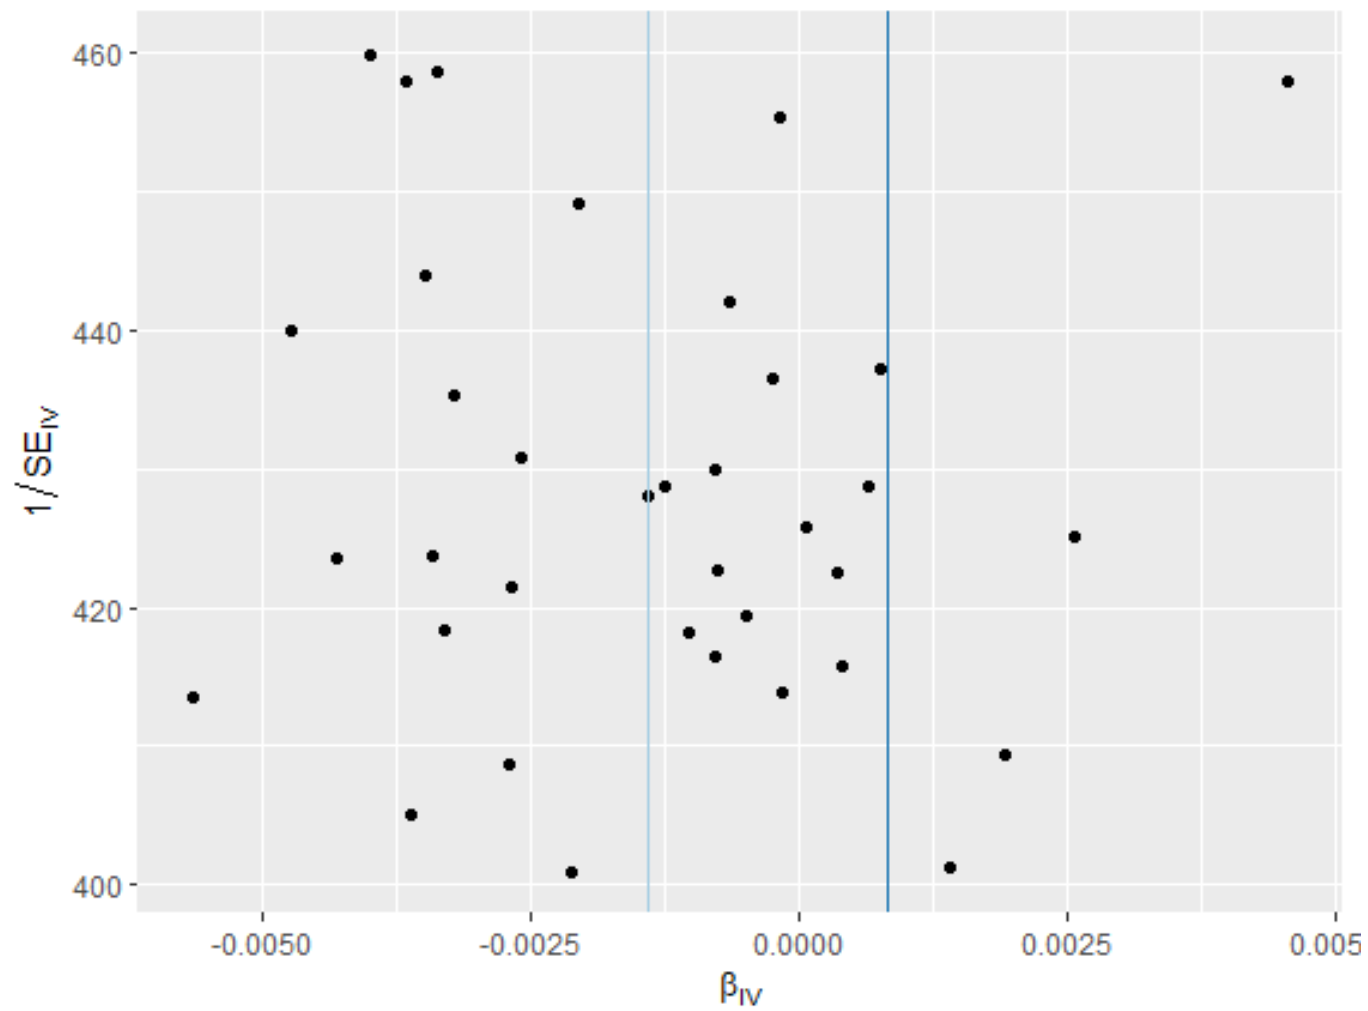

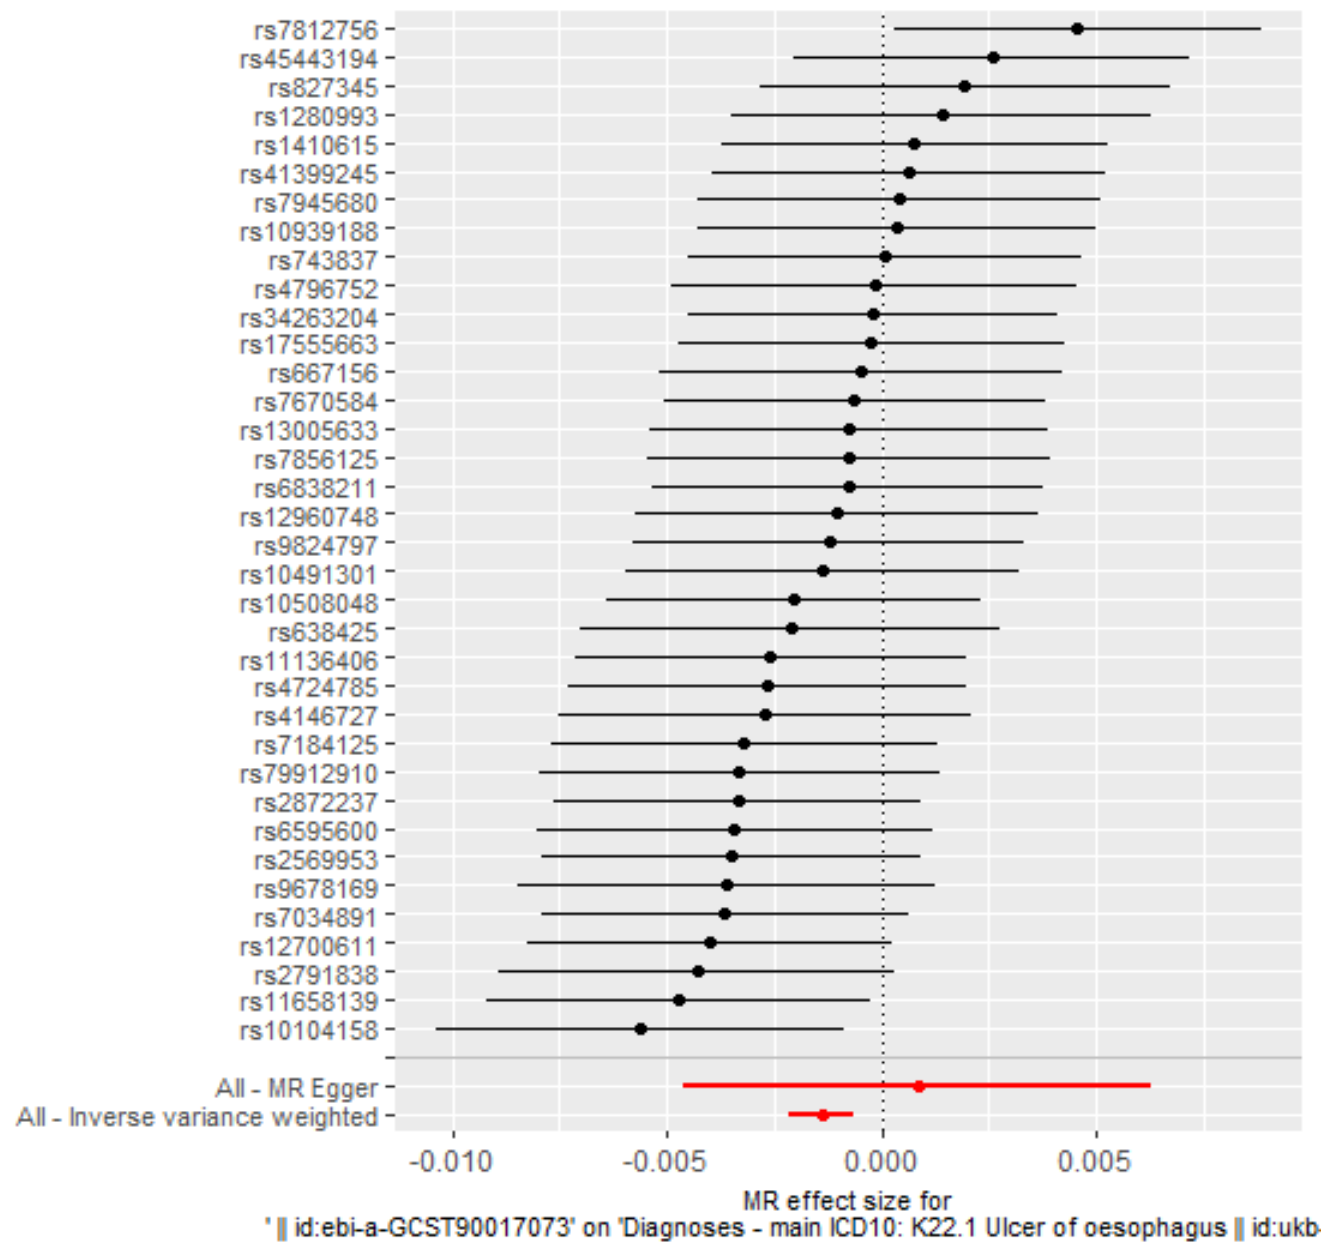

Effect on Diagnoses - main ICD10: K22.1 Ulcer of oesophagus || id:ukb-b-13731

### MR Test

- Inverse variance weighted
- MR Egger
- Simple mode
- Weighted median
- Weighted mode

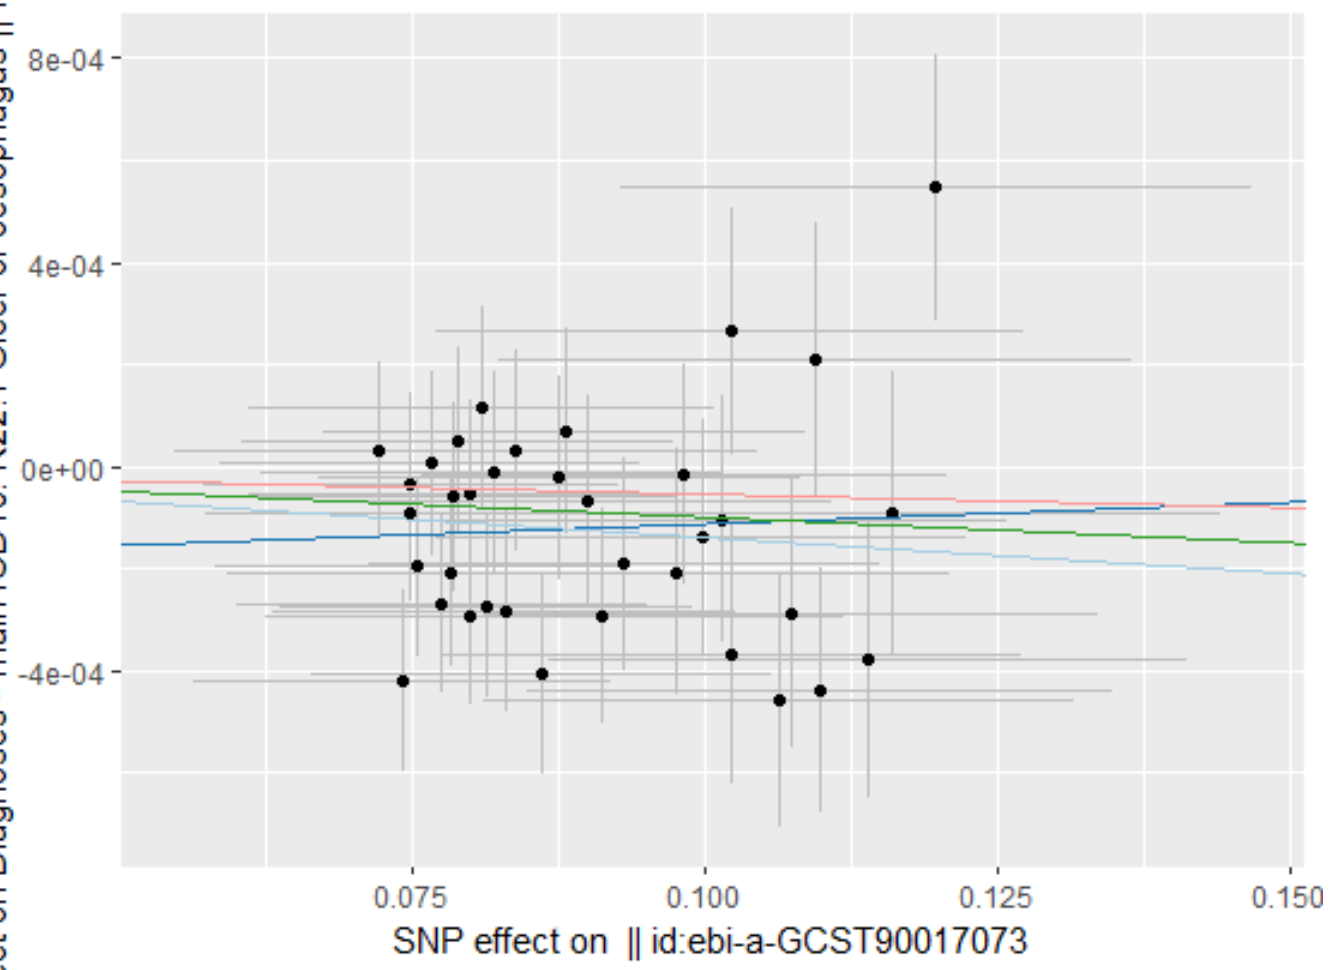



**Figure 33** Leave-one-out analysis, funnel plot, MR effect size and scatter plot for gut microbiota abundance (unknown genus id.2001) on ulcer of oesophagus

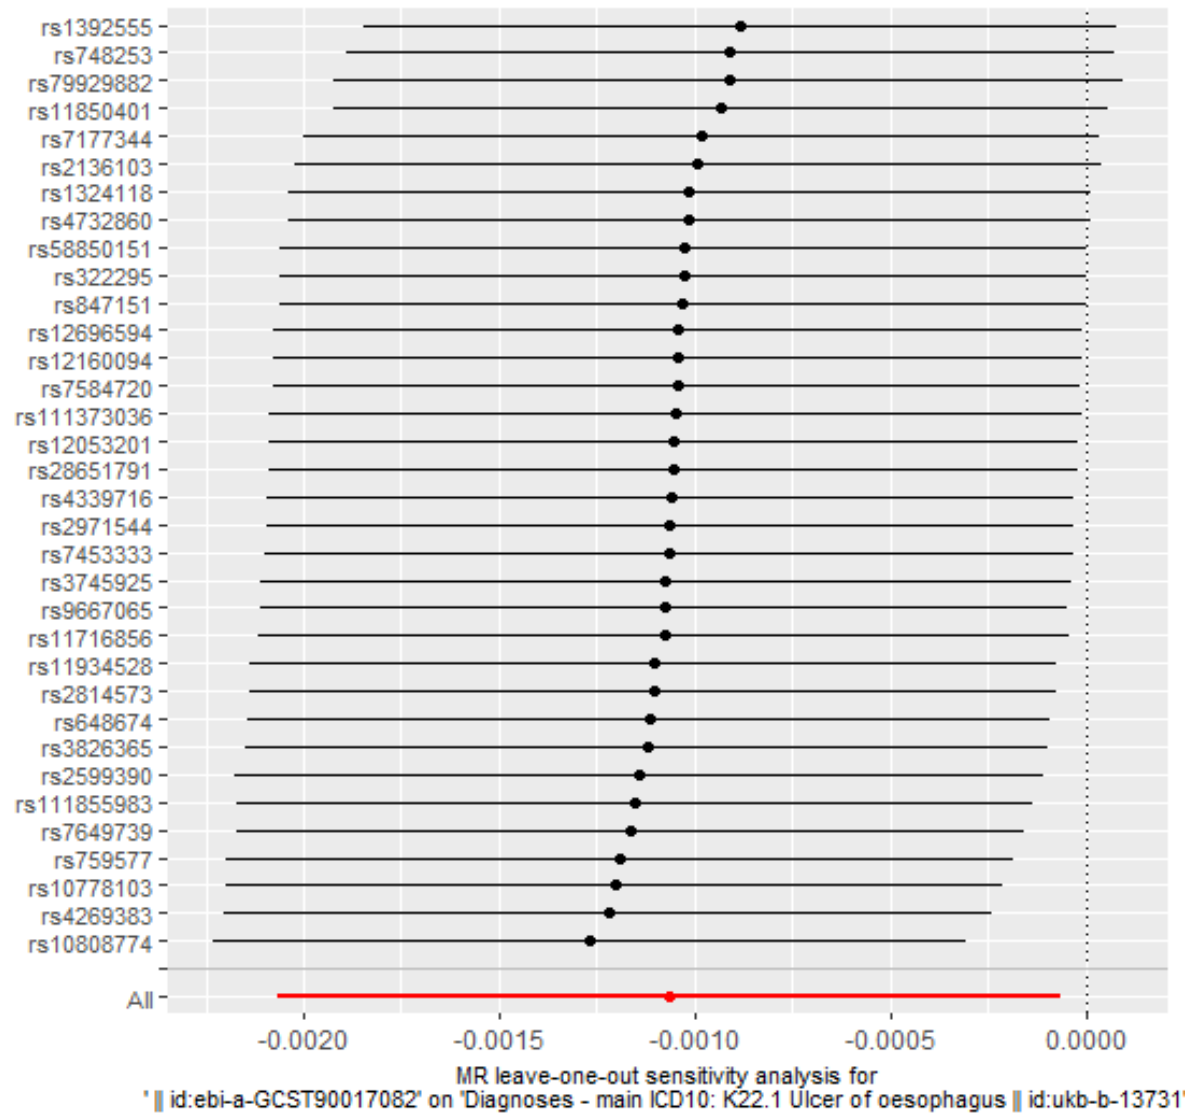

MR Method

- Inverse variance weighted
- MR Egger

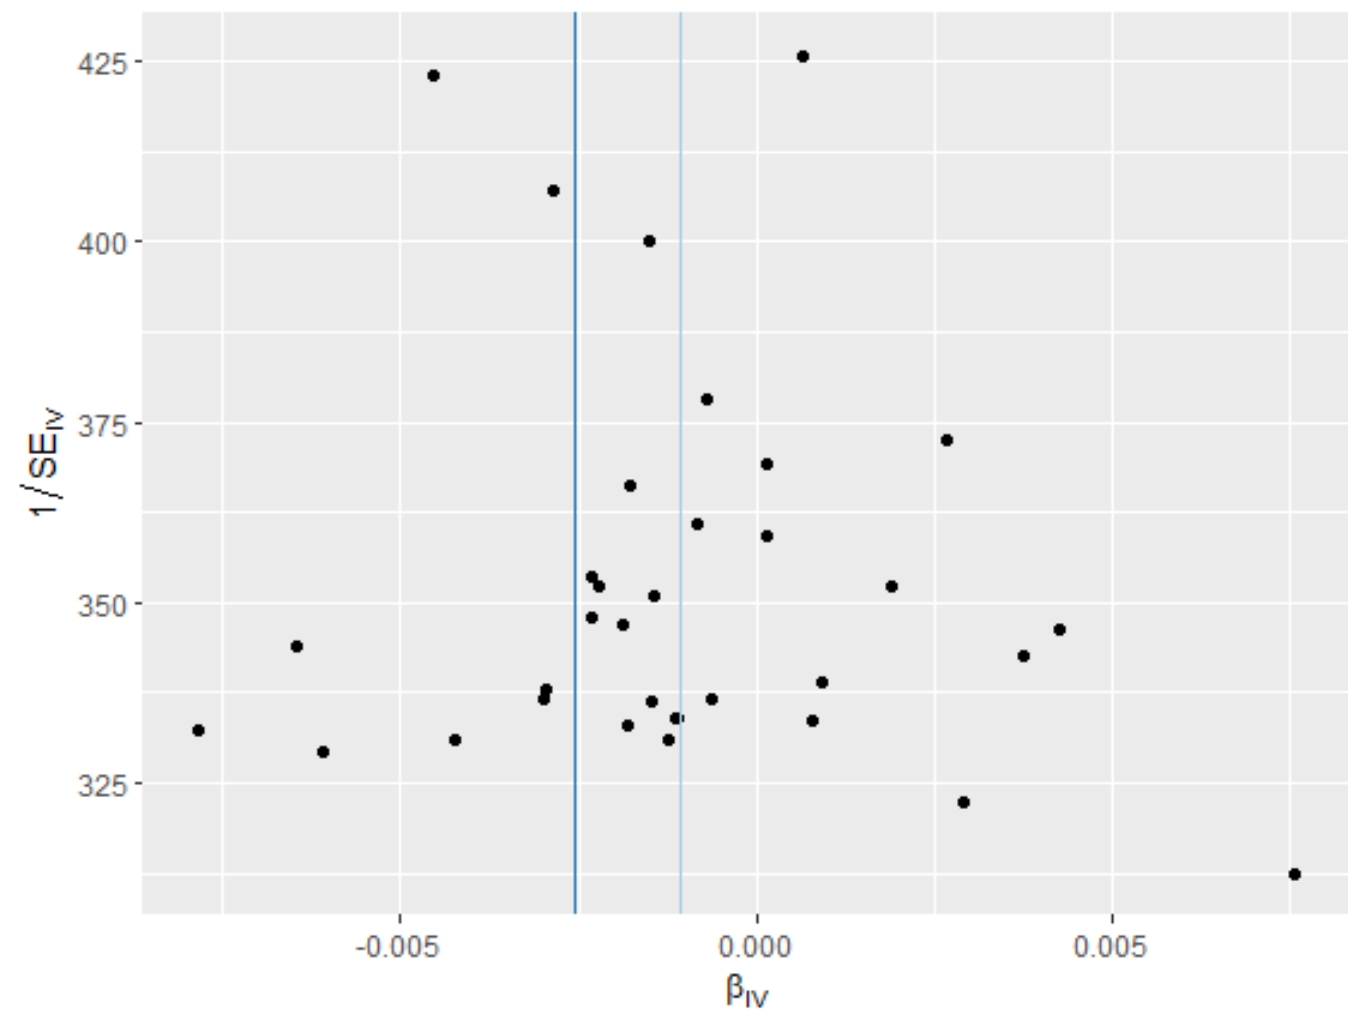

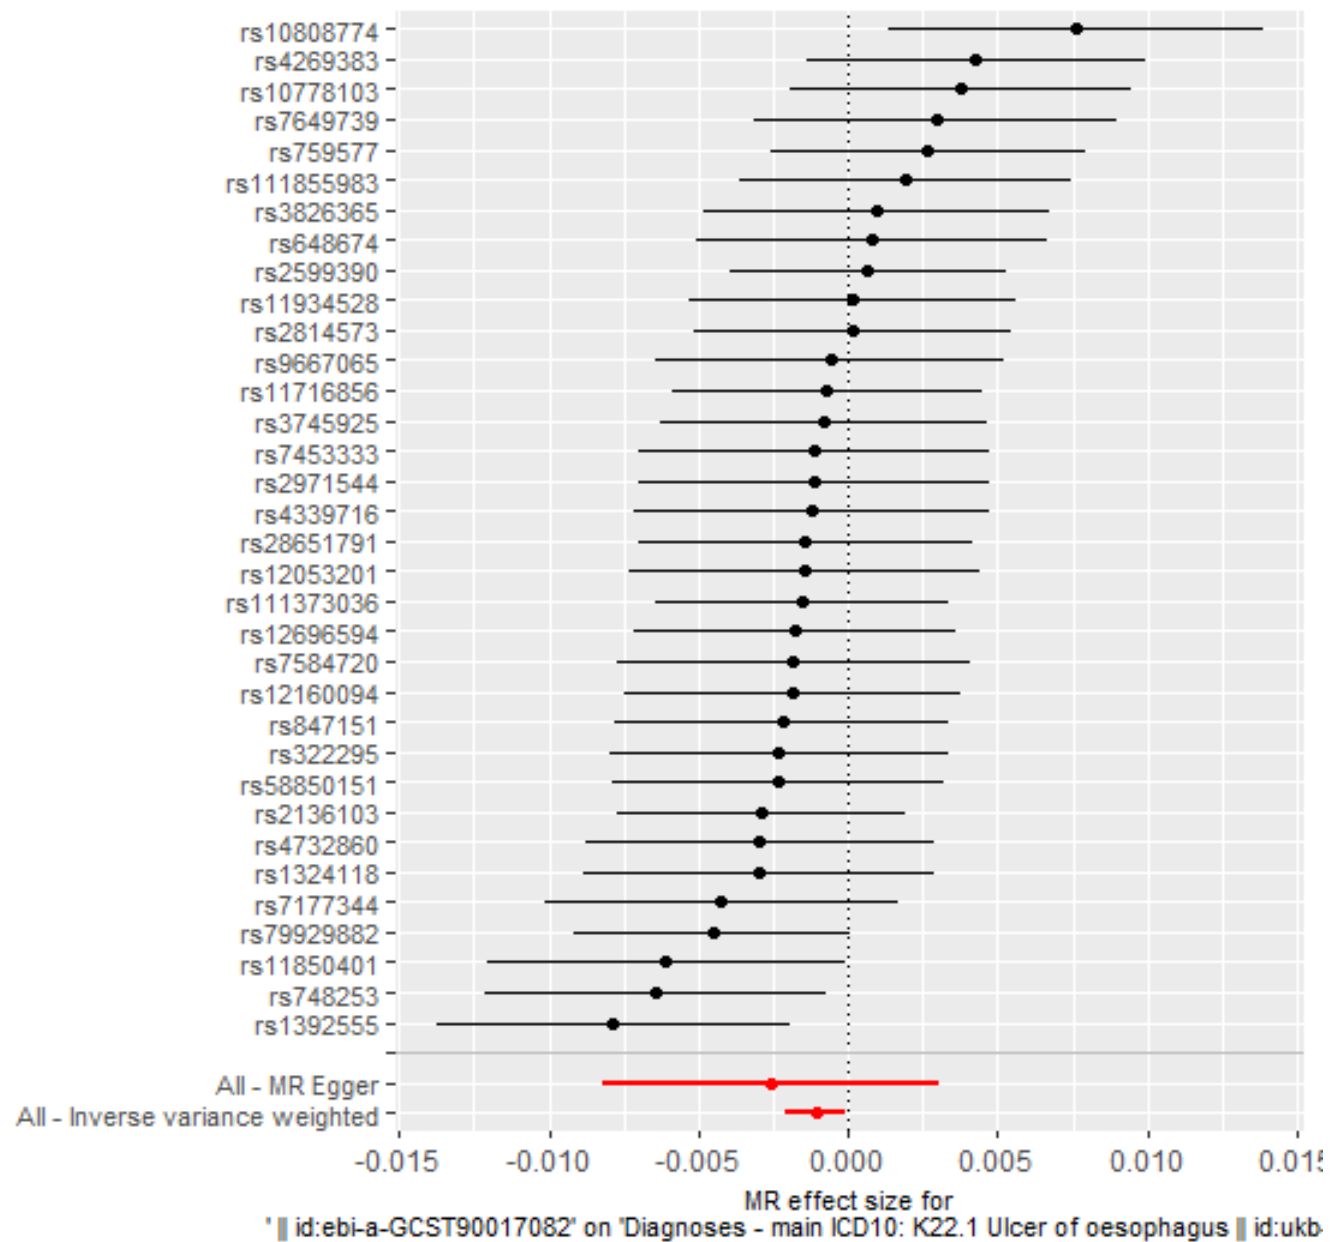

Effect on Diagnoses - main ICD10: K22.1 Ulcer of oesophagus || id:ukb-b-13731

### MR Test

- Inverse variance weighted
- MR Egger
- Simple mode
- Weighted median
- Weighted mode

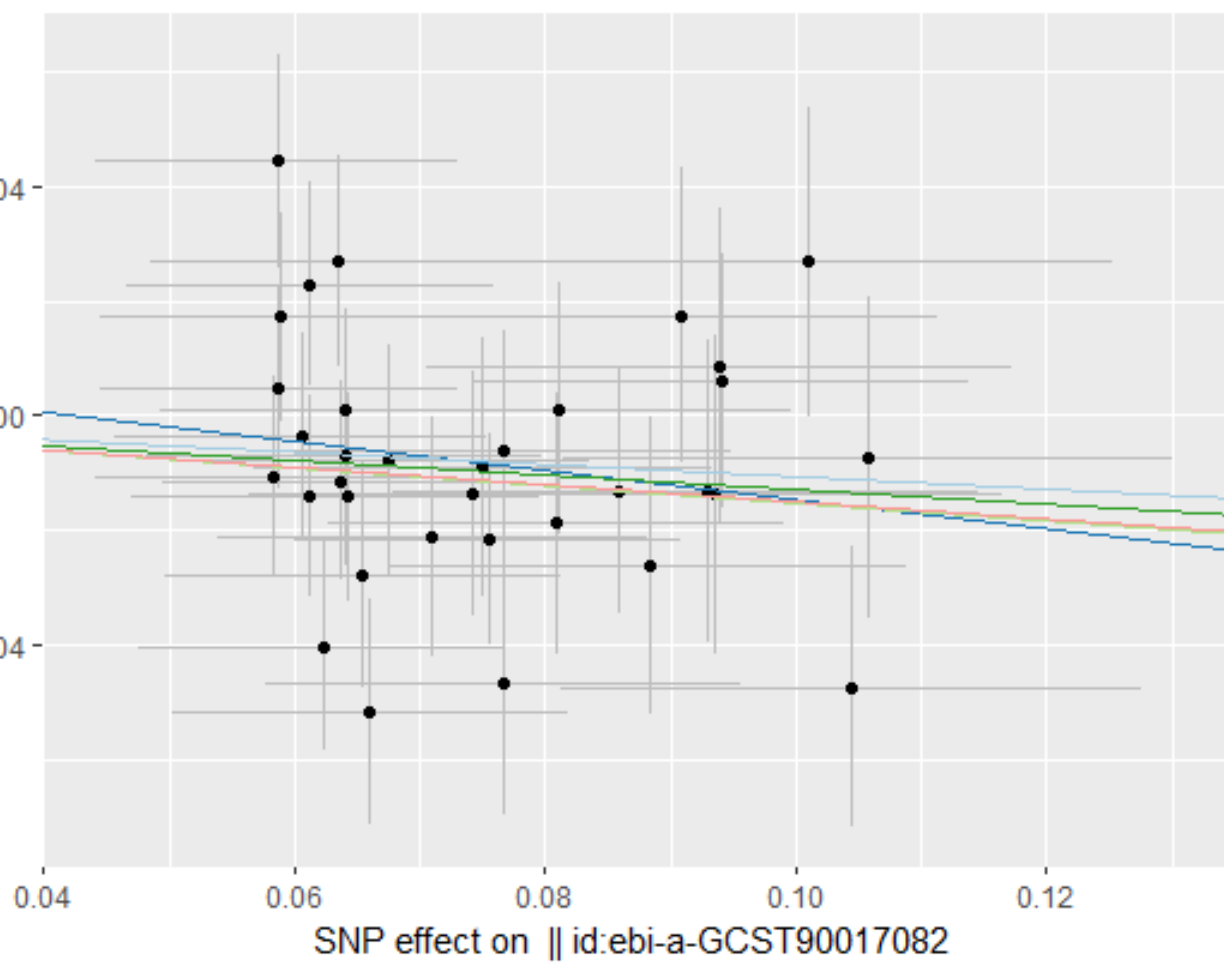

**Figure 34** Leave-one-out analysis, funnel plot, MR effect size and scatter plot for gut microbiota abundance (unknown genus id.2755) on ulcer of oesophagus

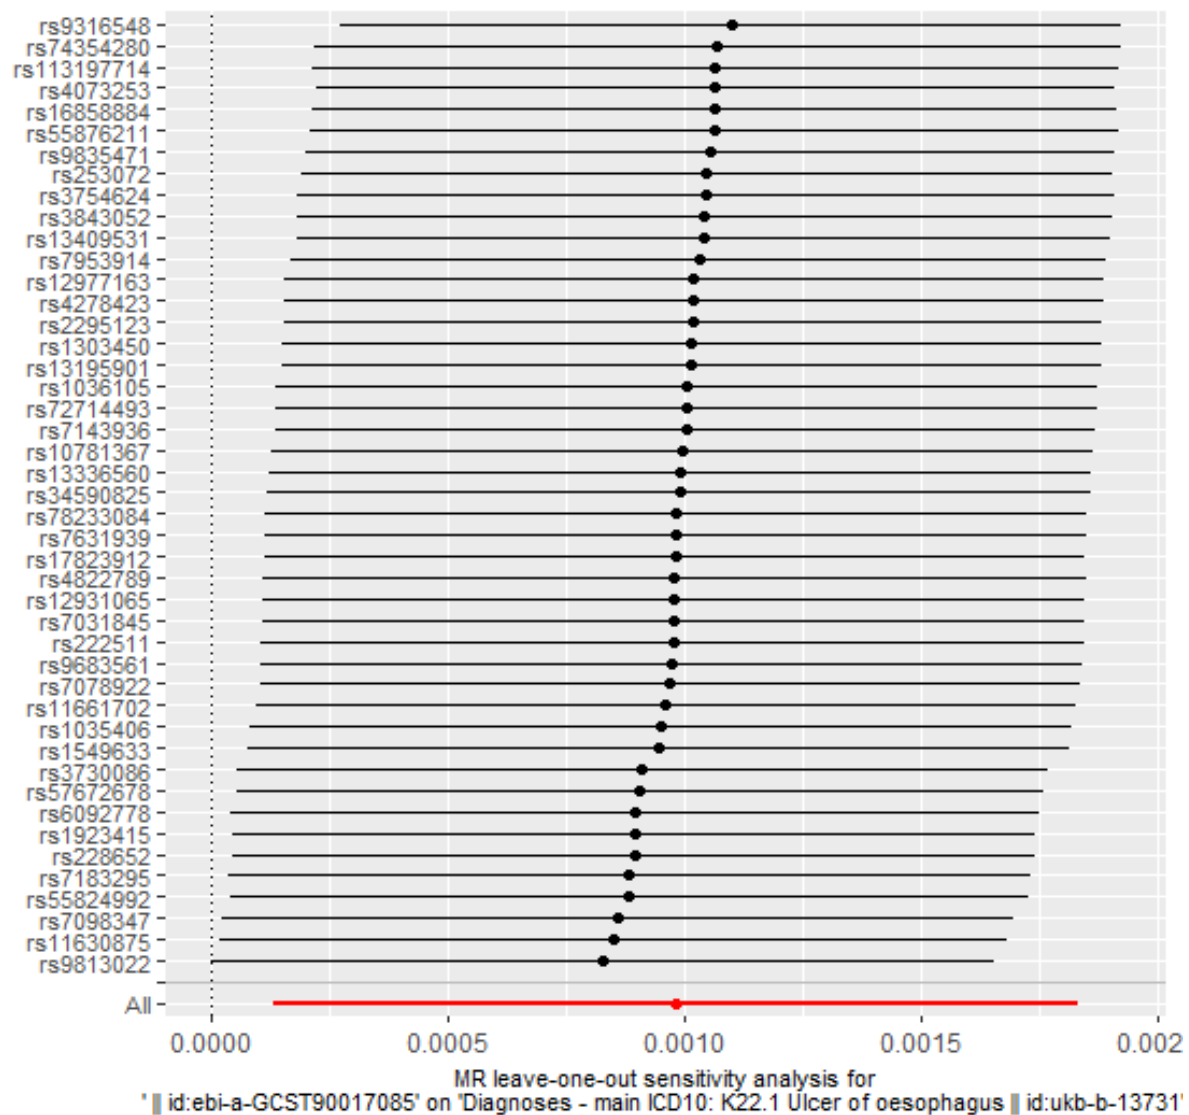

MR Method

- Inverse variance weighted
- MR Egger

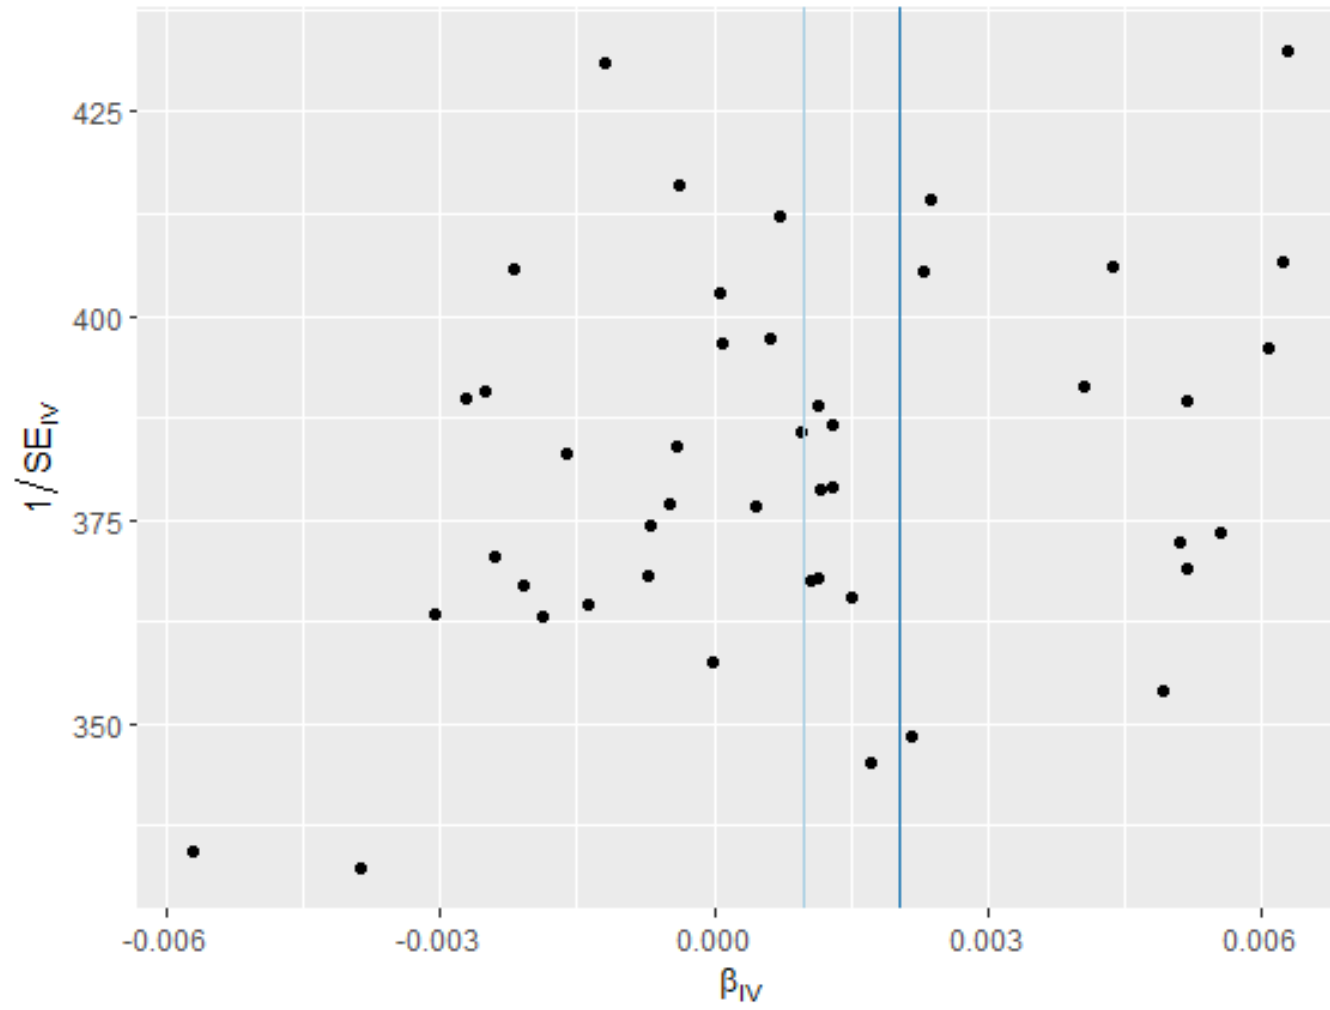

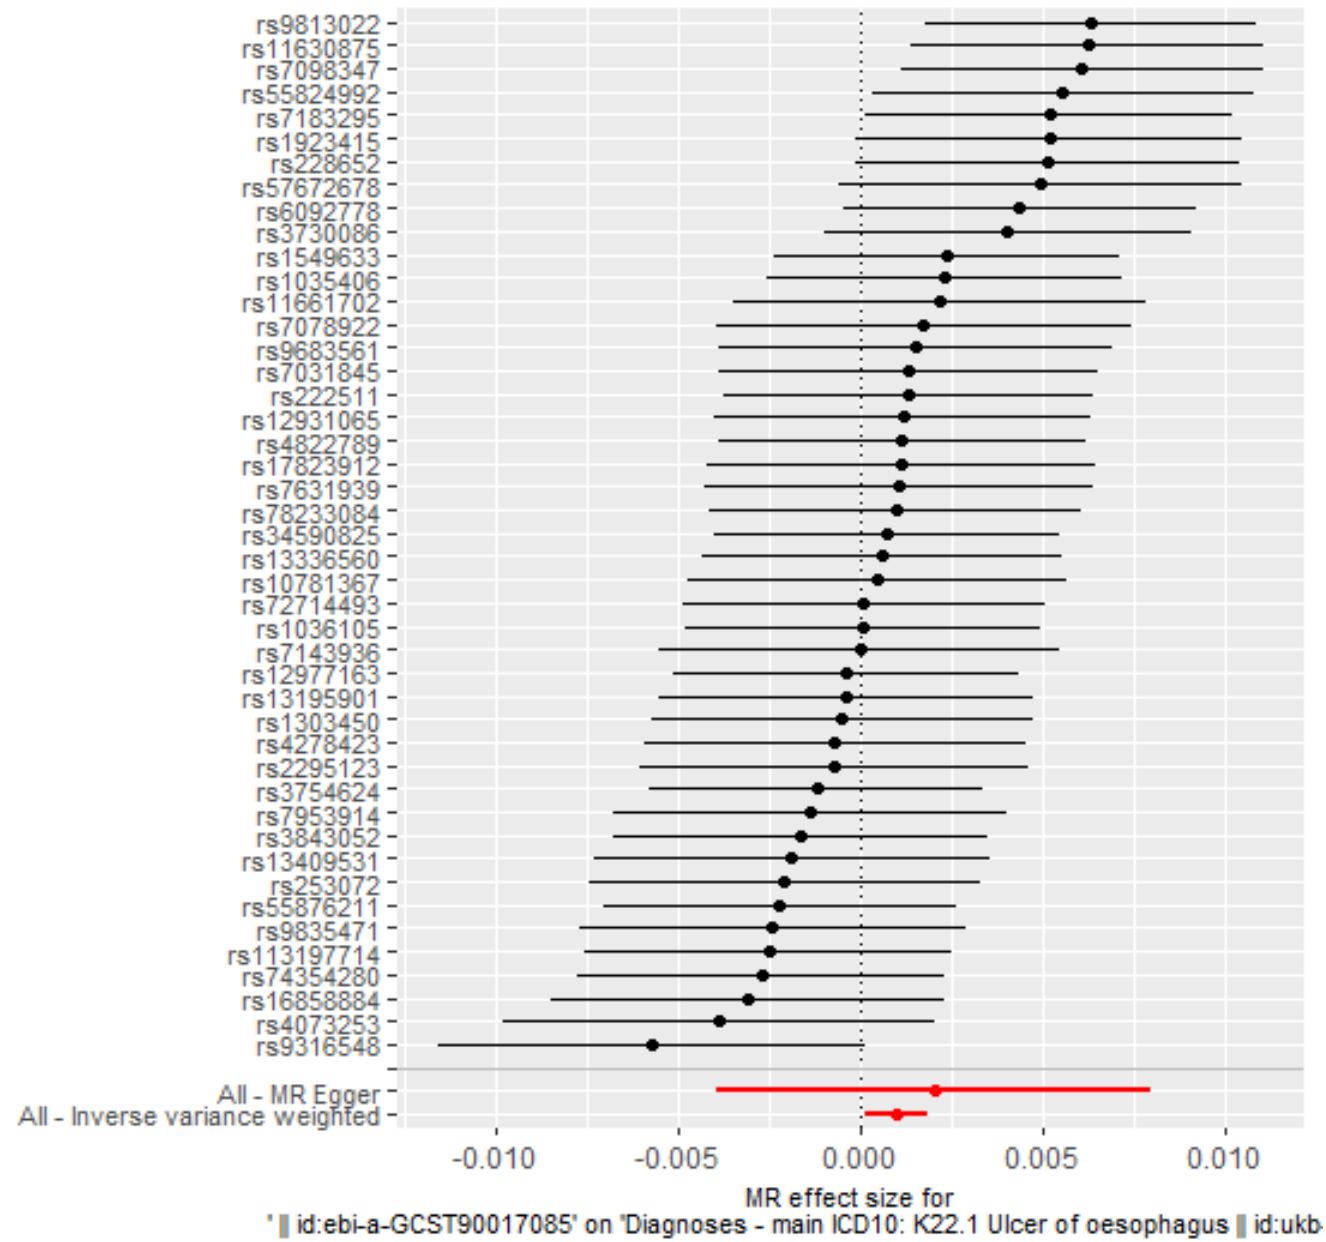

Effect on Diagnoses - main ICD10: K22.1 Ulcer of oesophagus || id:ukb-b-13731

### MR Test

- Inverse variance weighted
- MR Egger
- Simple mode
- Weighted median
- Weighted mode

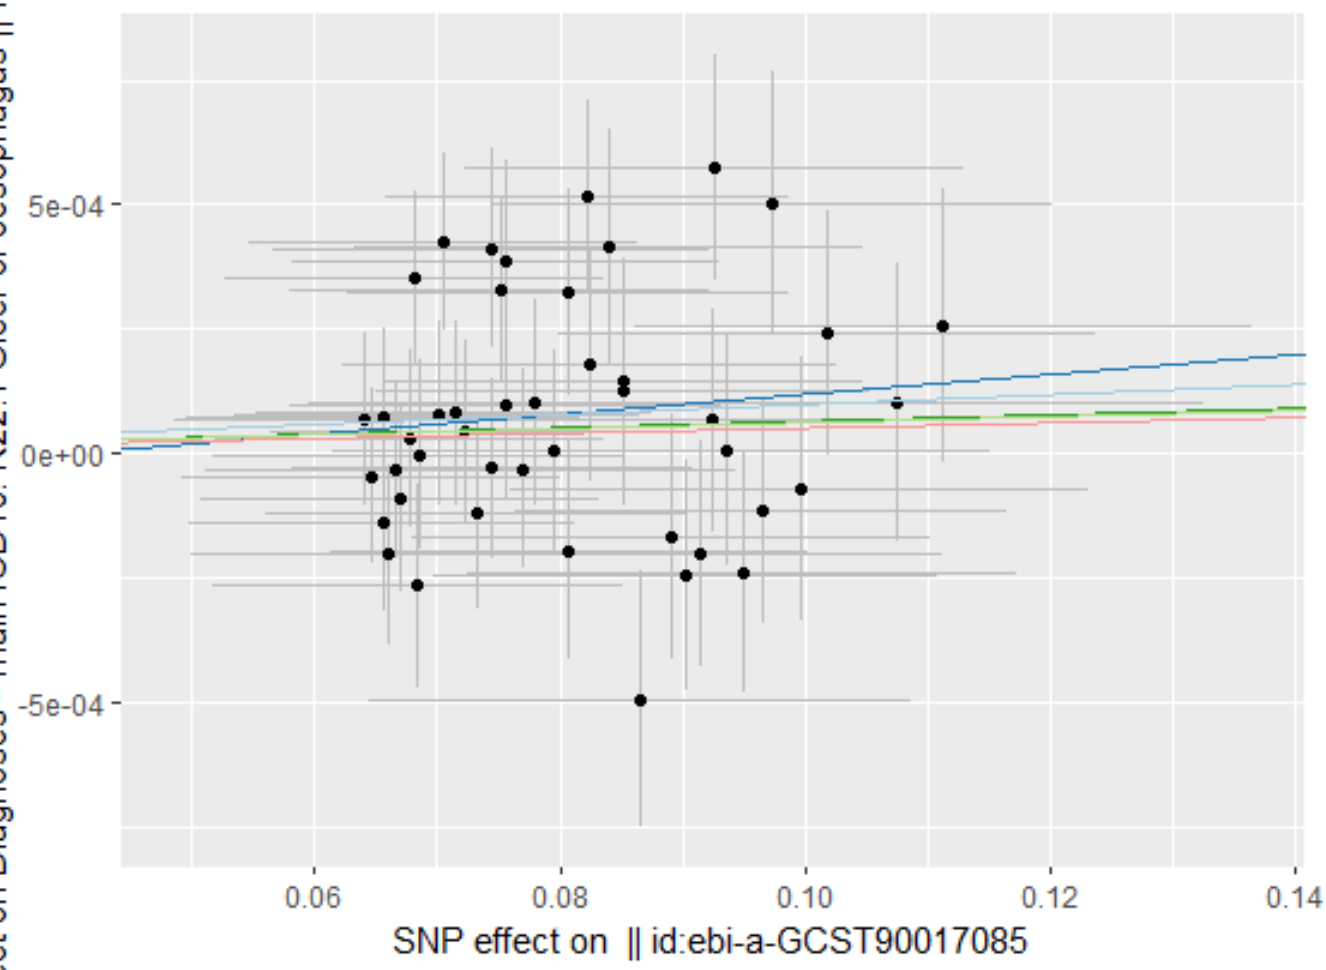



**Figure 35** Leave-one-out analysis, funnel plot, MR effect size and scatter plot for gut microbiota abundance (order Bacillales id.1674) on ulcer of oesophagus

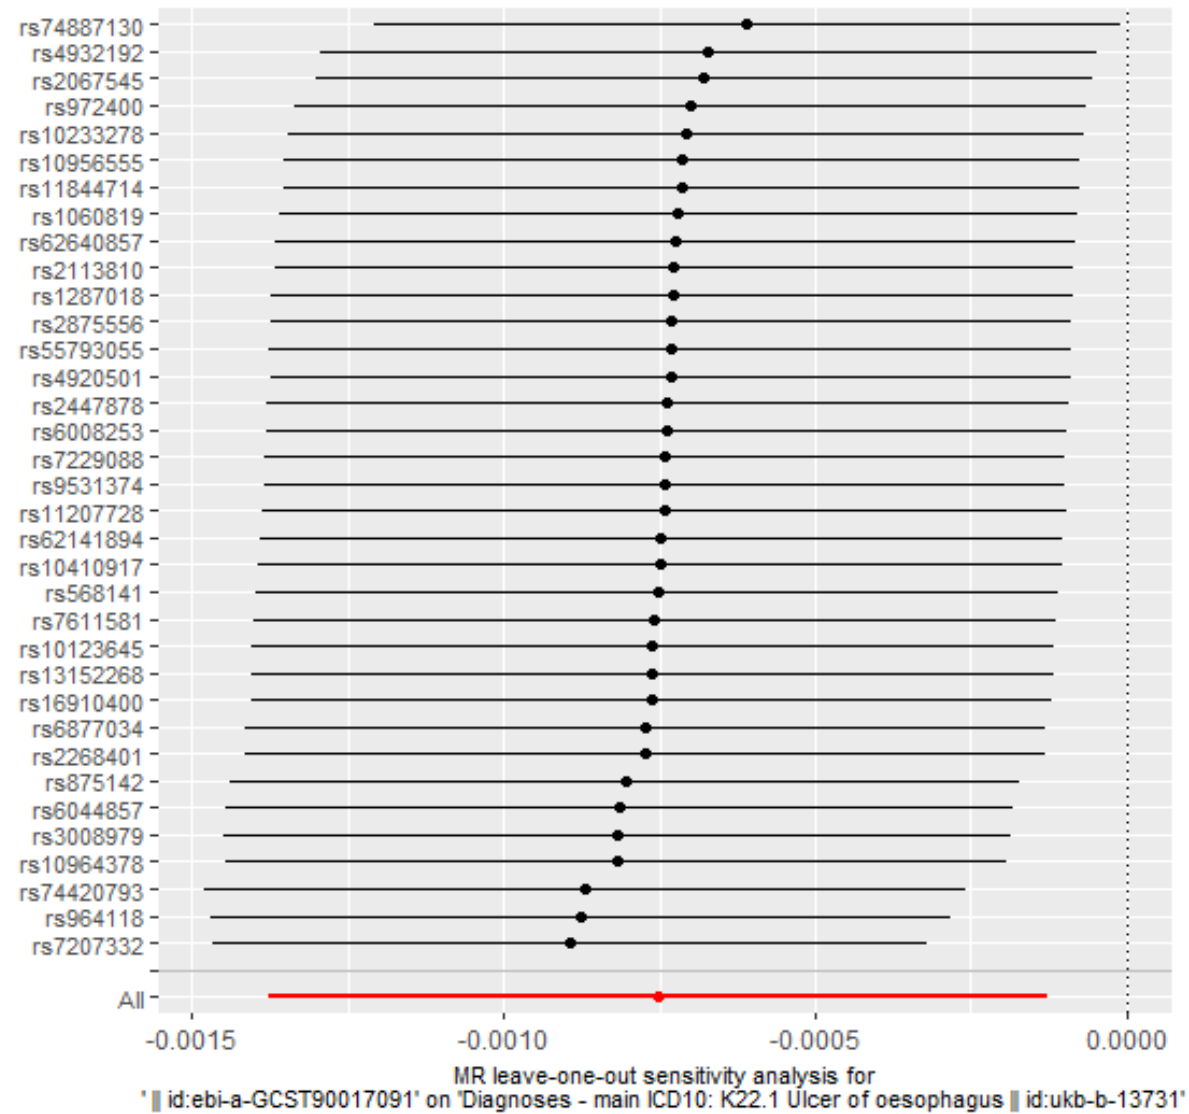

MR Method

- Inverse variance weighted
- MR Egger

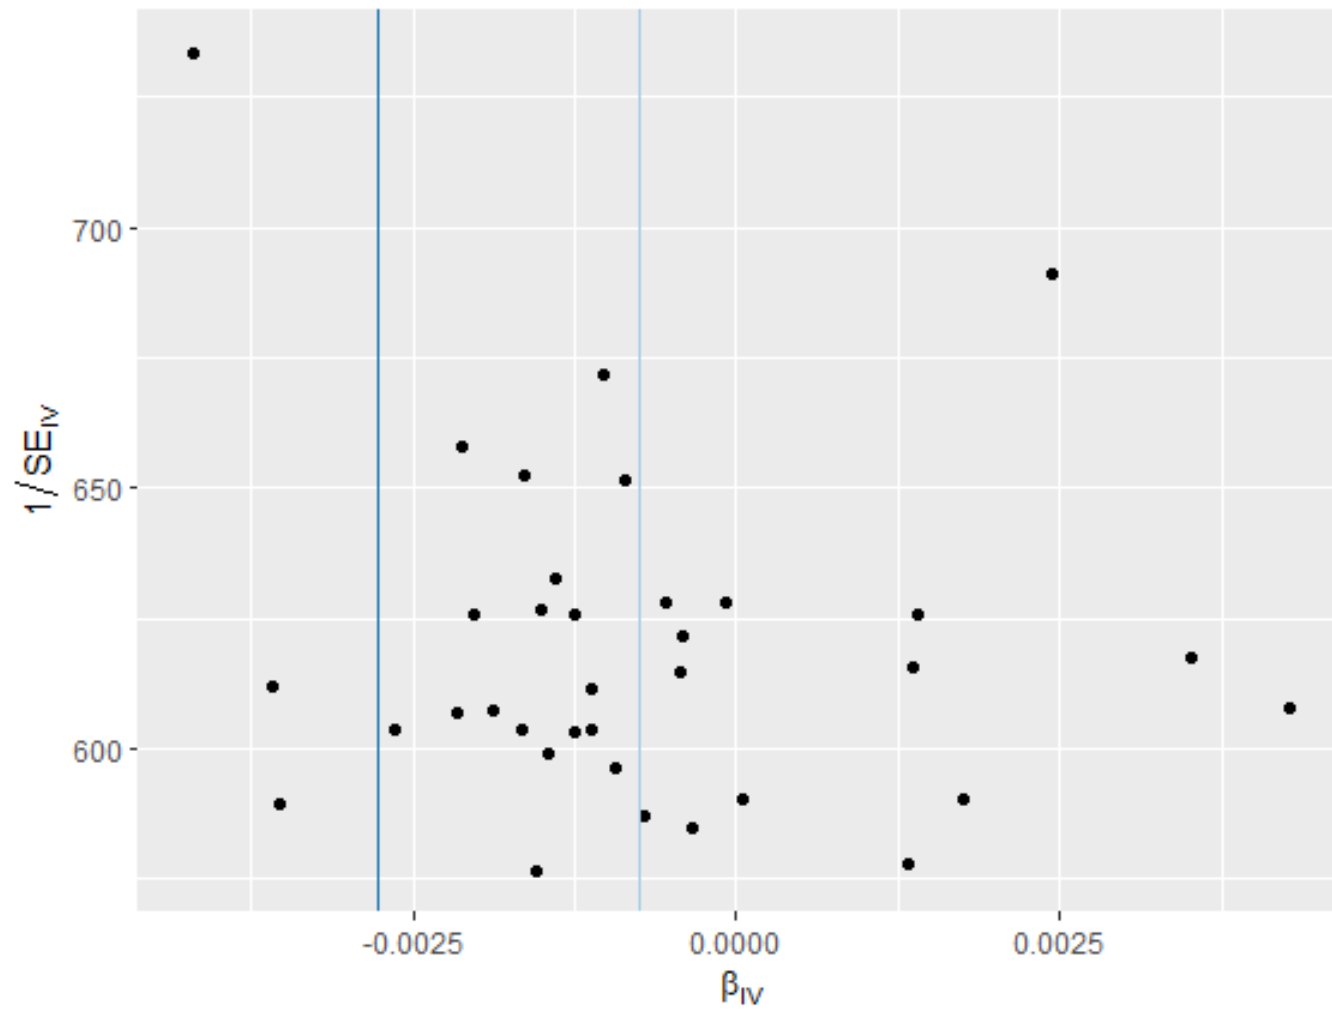

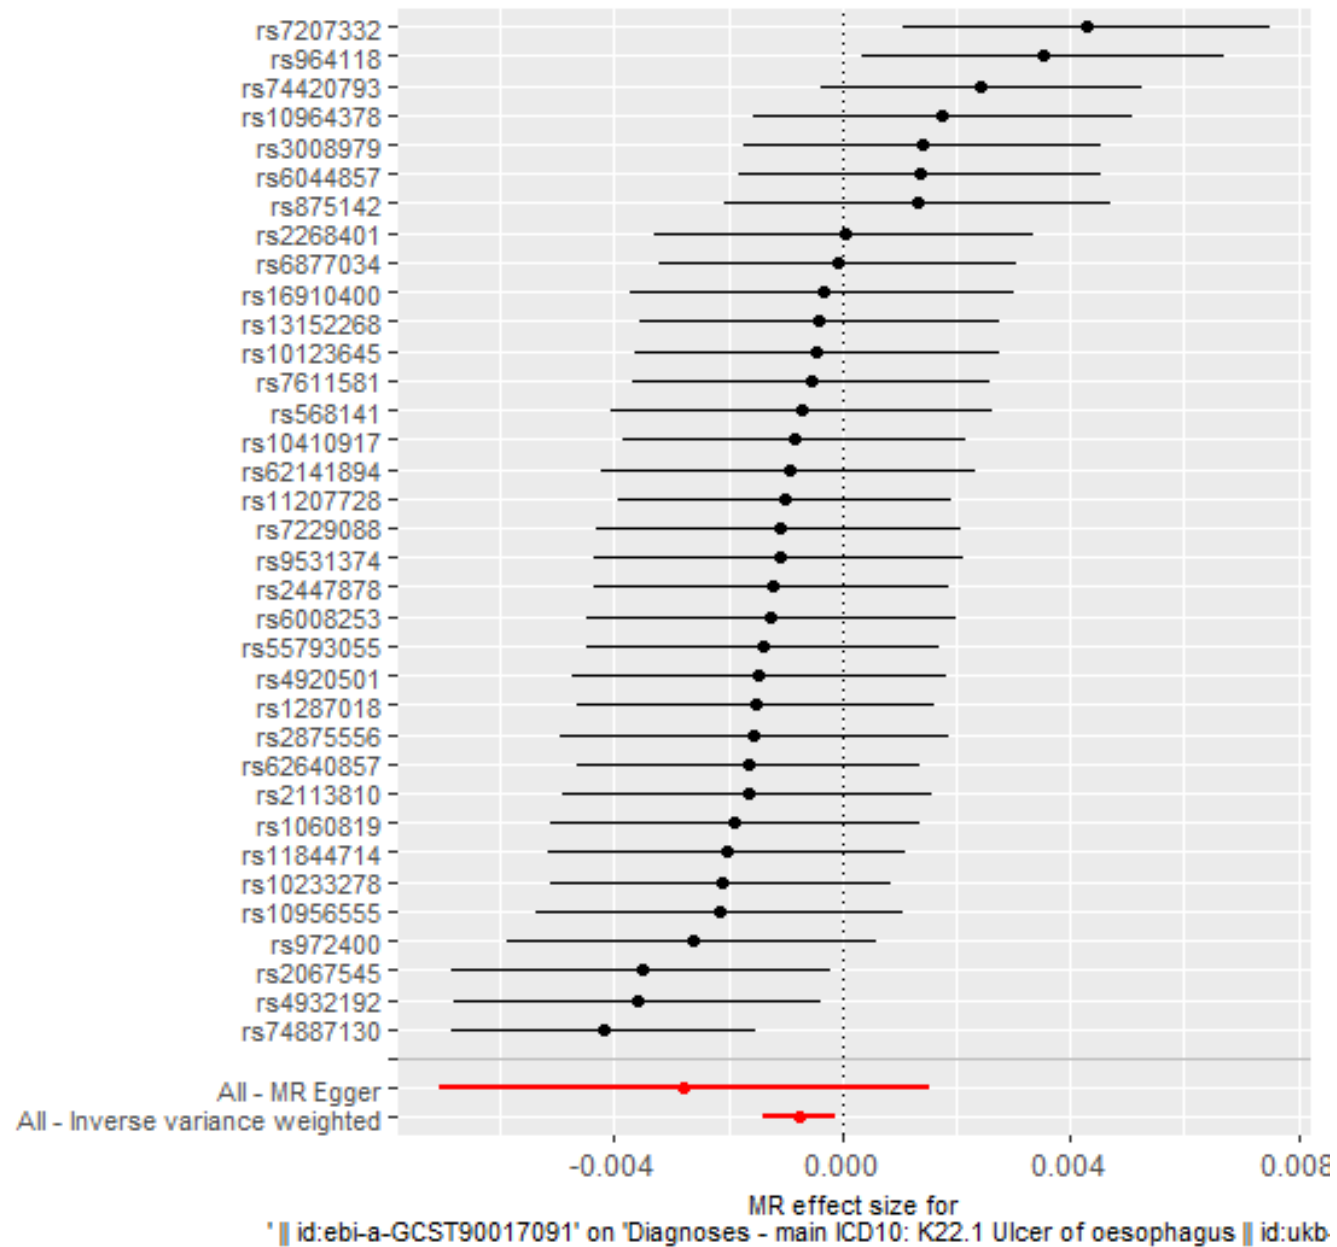

act on Diagnoses - main ICD10: K22.1 Ulcer of oesophagus || id:ukb-b-13731

### MR Test

- Inverse variance weighted
- MR Egger
- Simple mode
- Weighted median
- Weighted mode

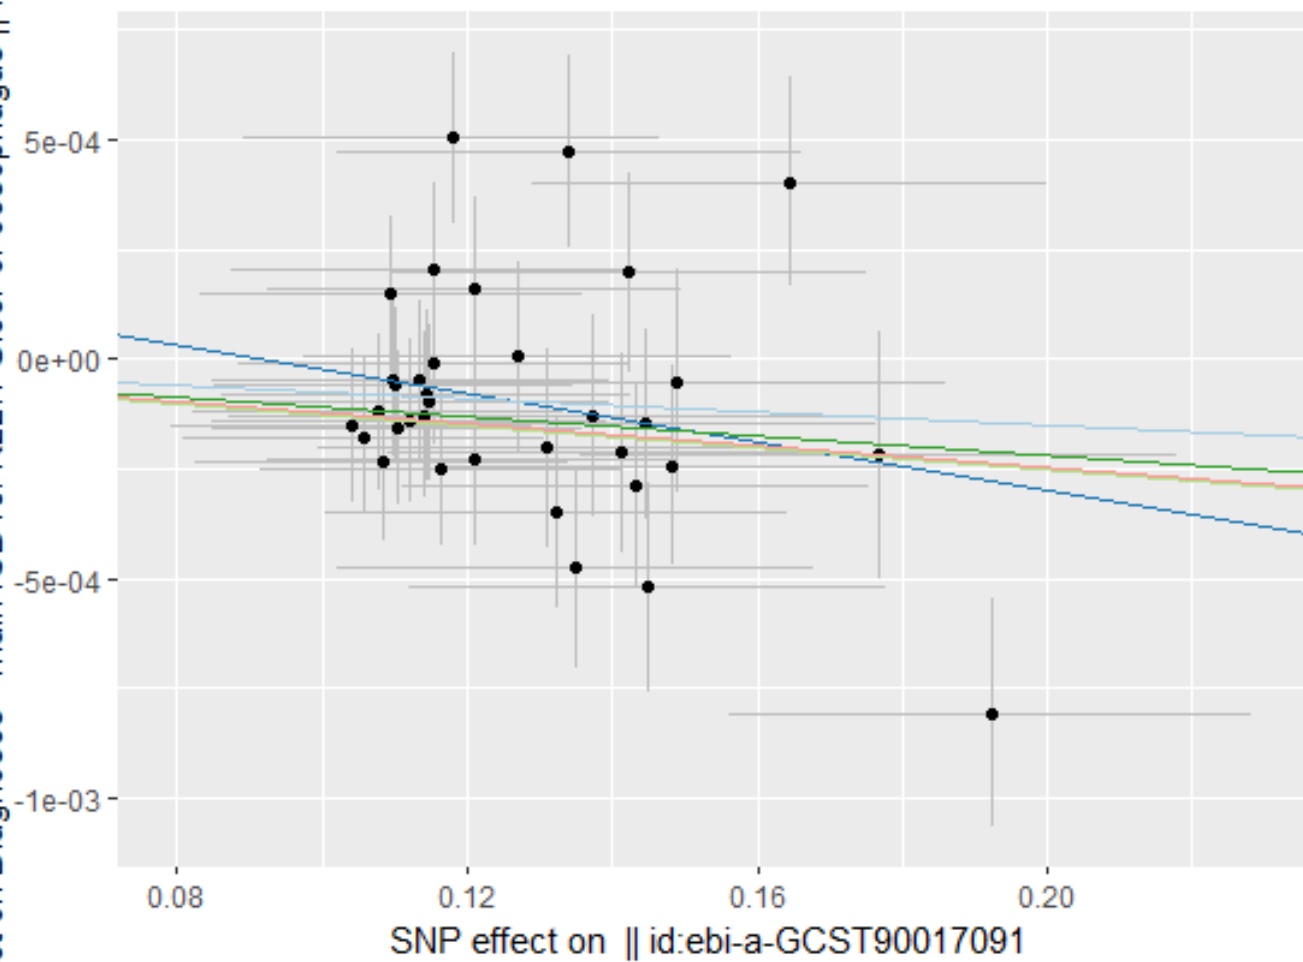

**Figure 36** Leave-one-out analysis, funnel plot, MR effect size and scatter plot for gut microbiota abundance (order Bacteroidales id.913) on ulcer of oesophagus

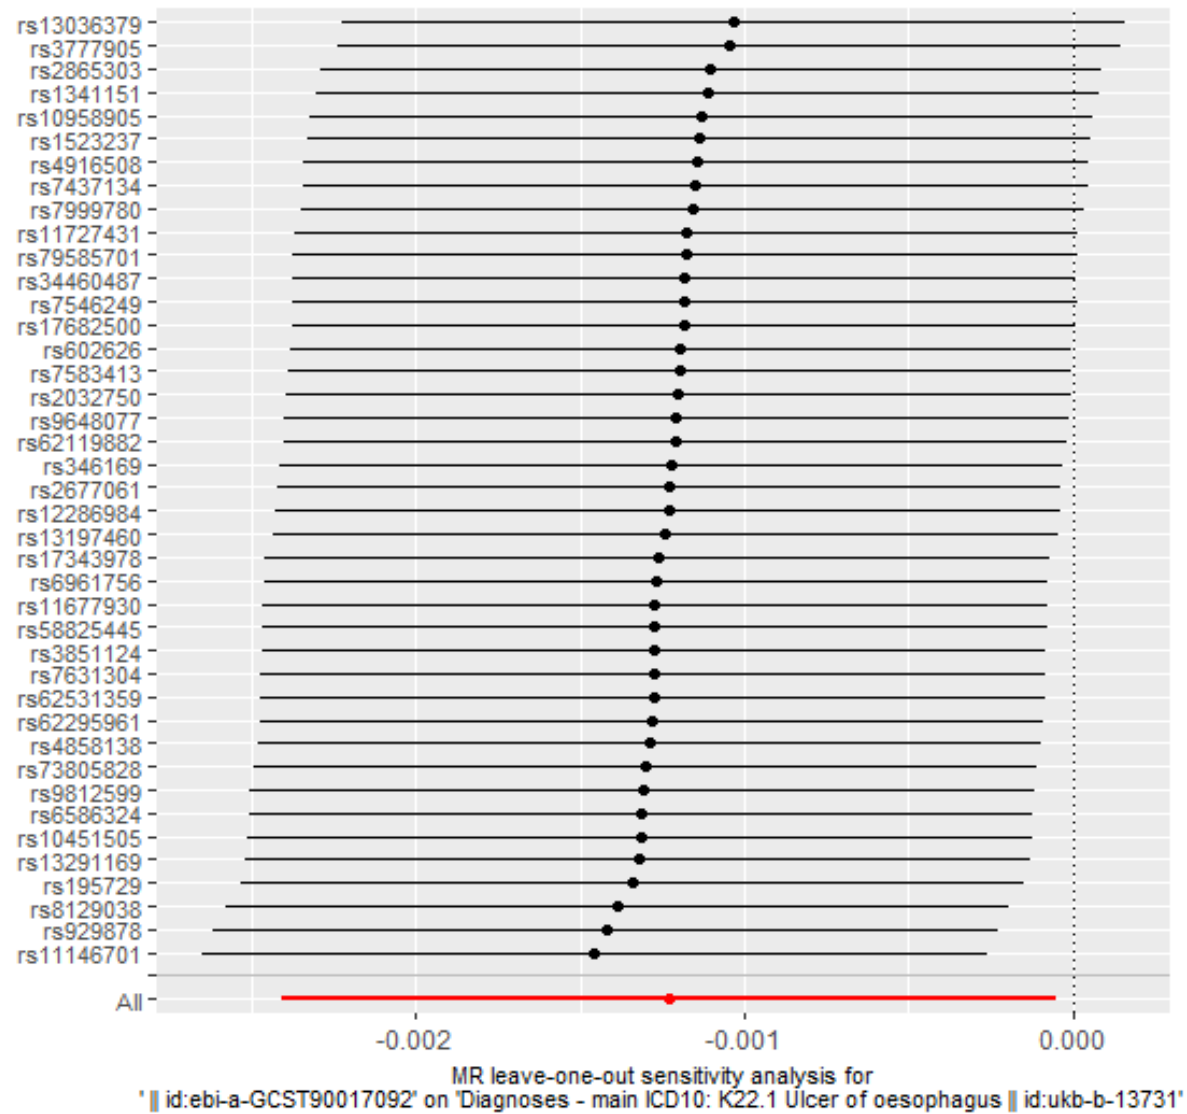

MR Method

- Inverse variance weighted
- MR Egger



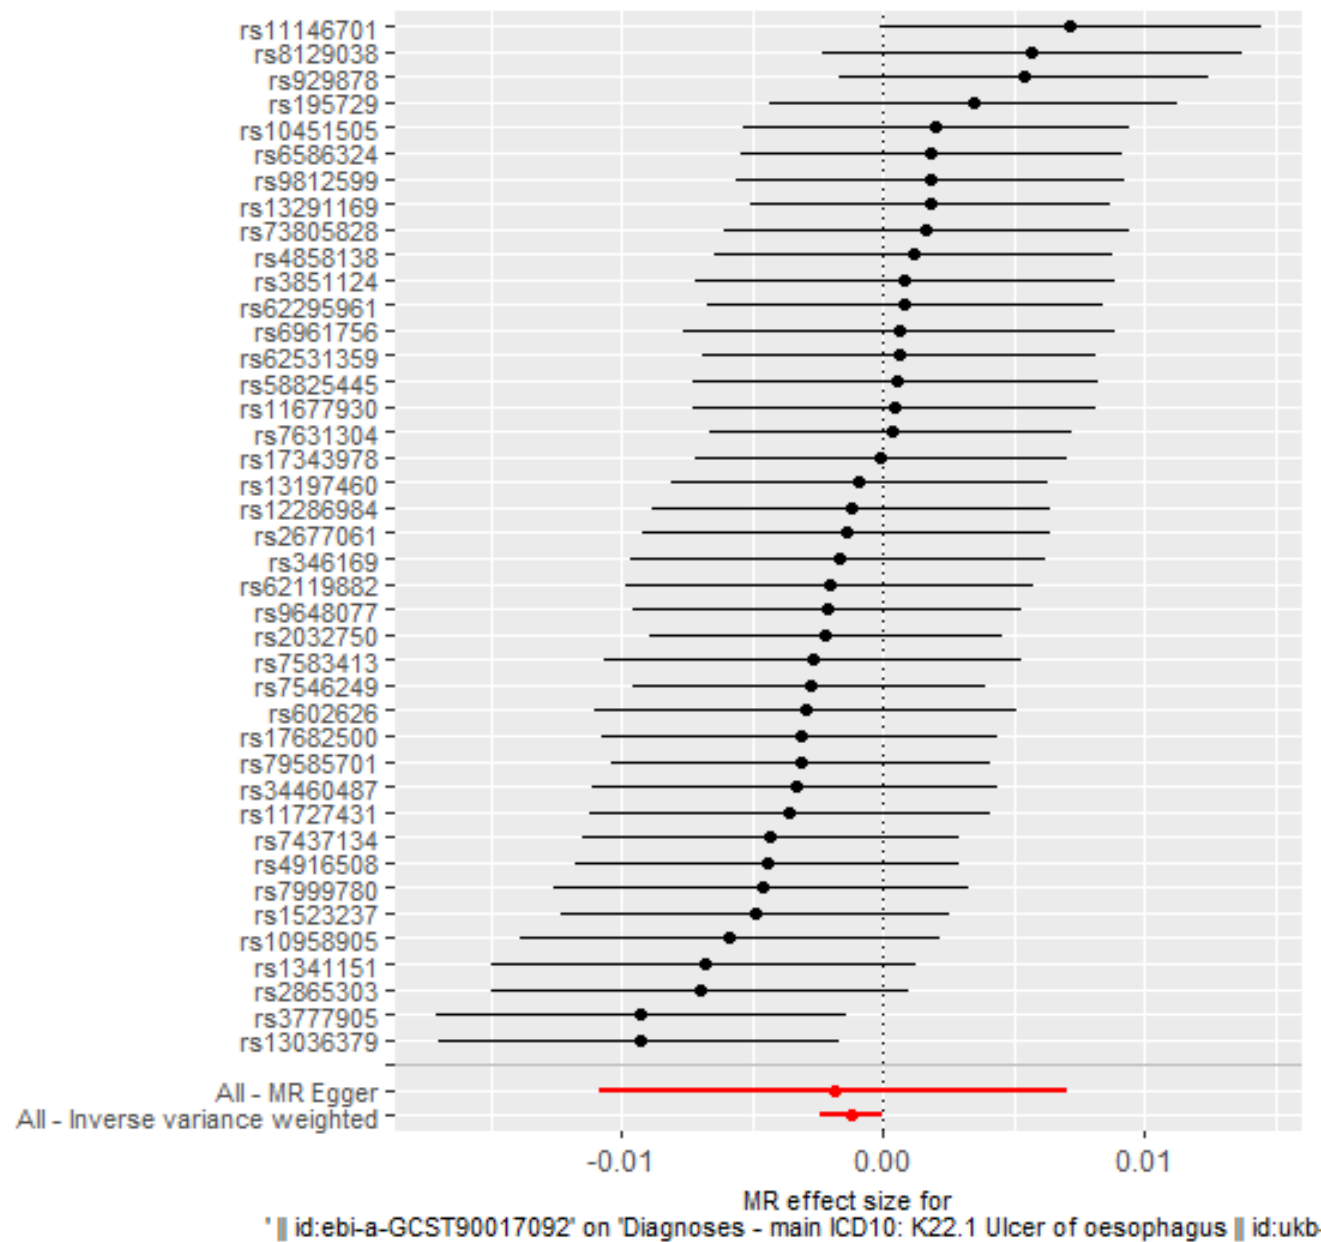

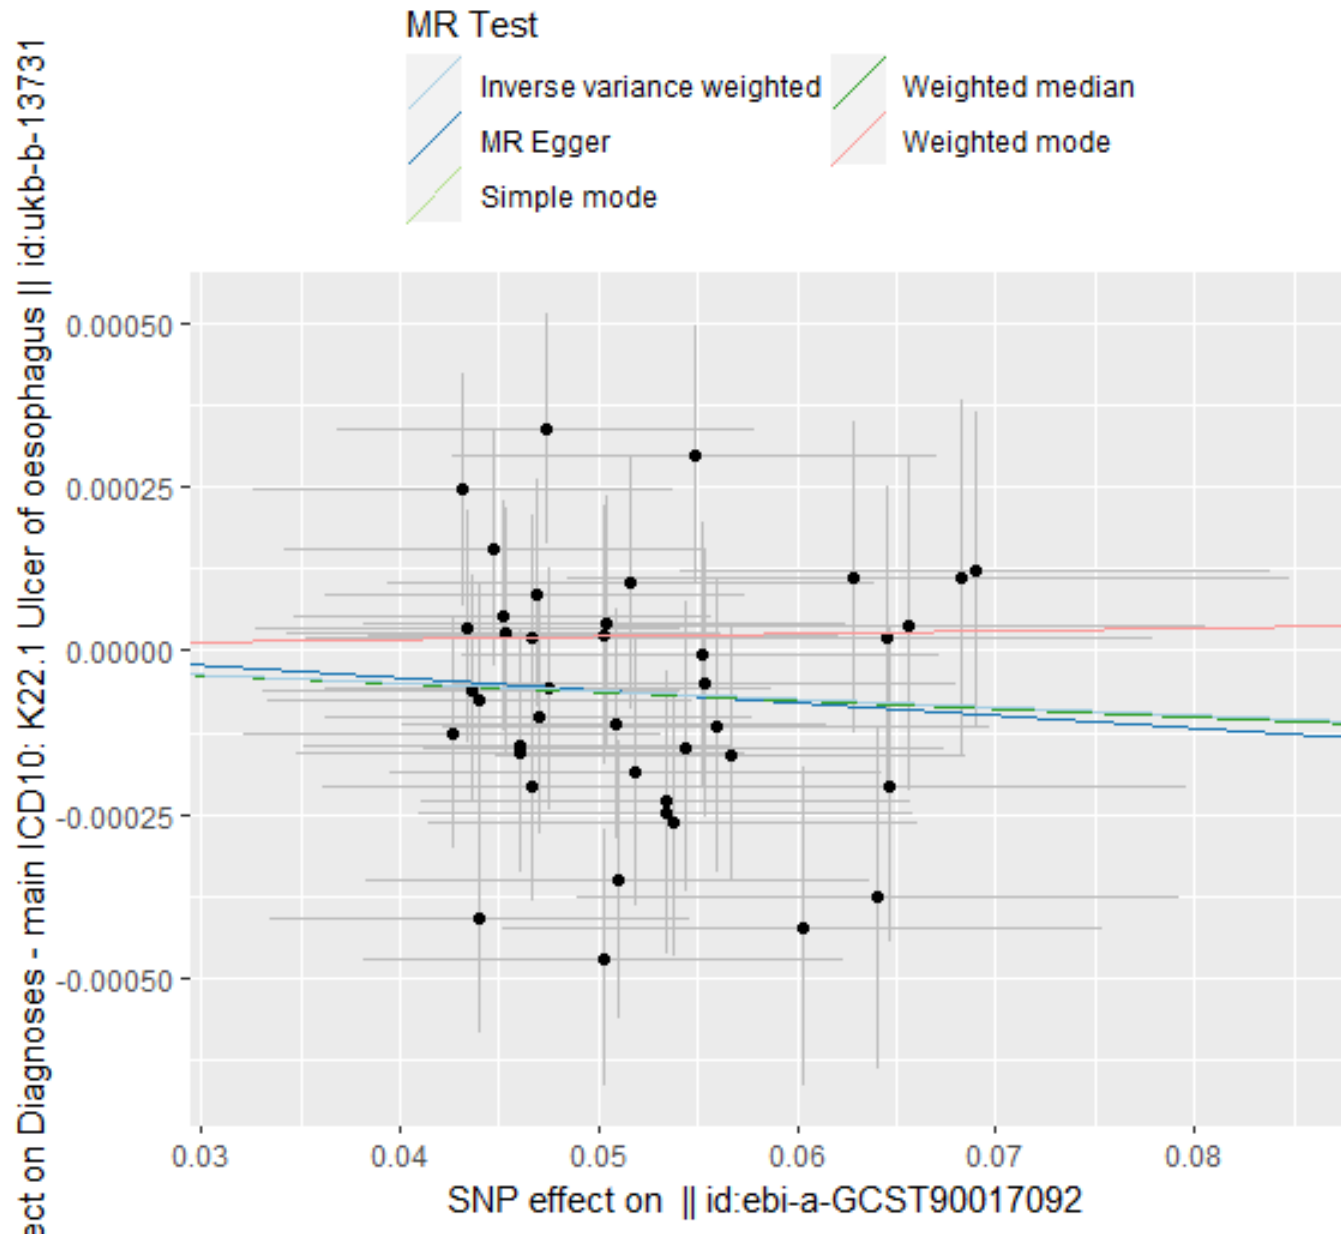



**Figure 37** Leave-one-out analysis, funnel plot, MR effect size and scatter plot for gut microbiota abundance (order Rhodospirillales id.2667) on ulcer of oesophagus

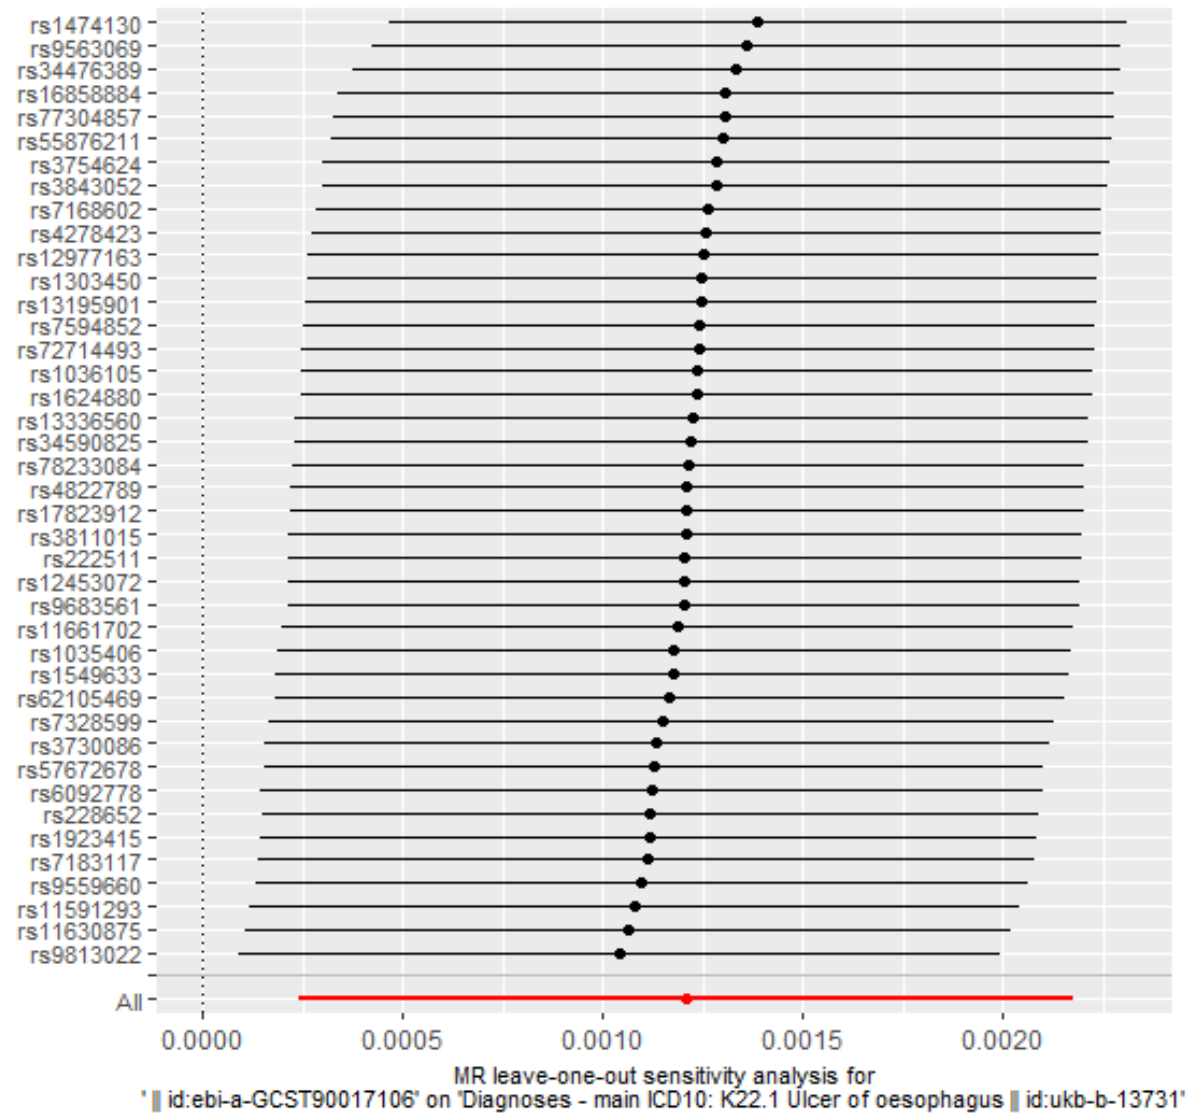

MR Method

- Inverse variance weighted
- MR Egger

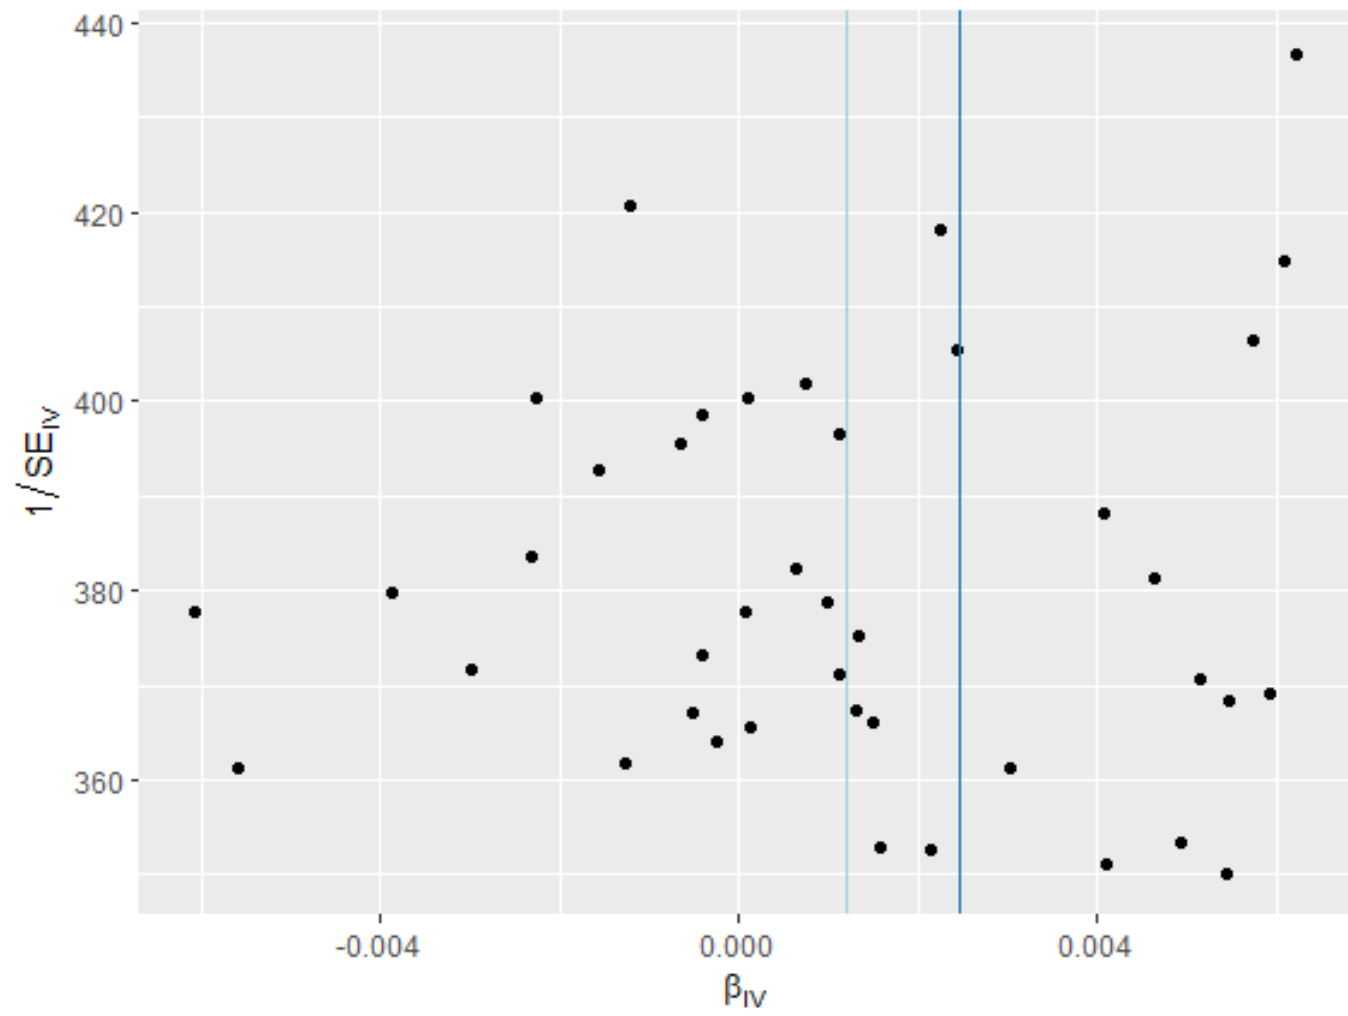

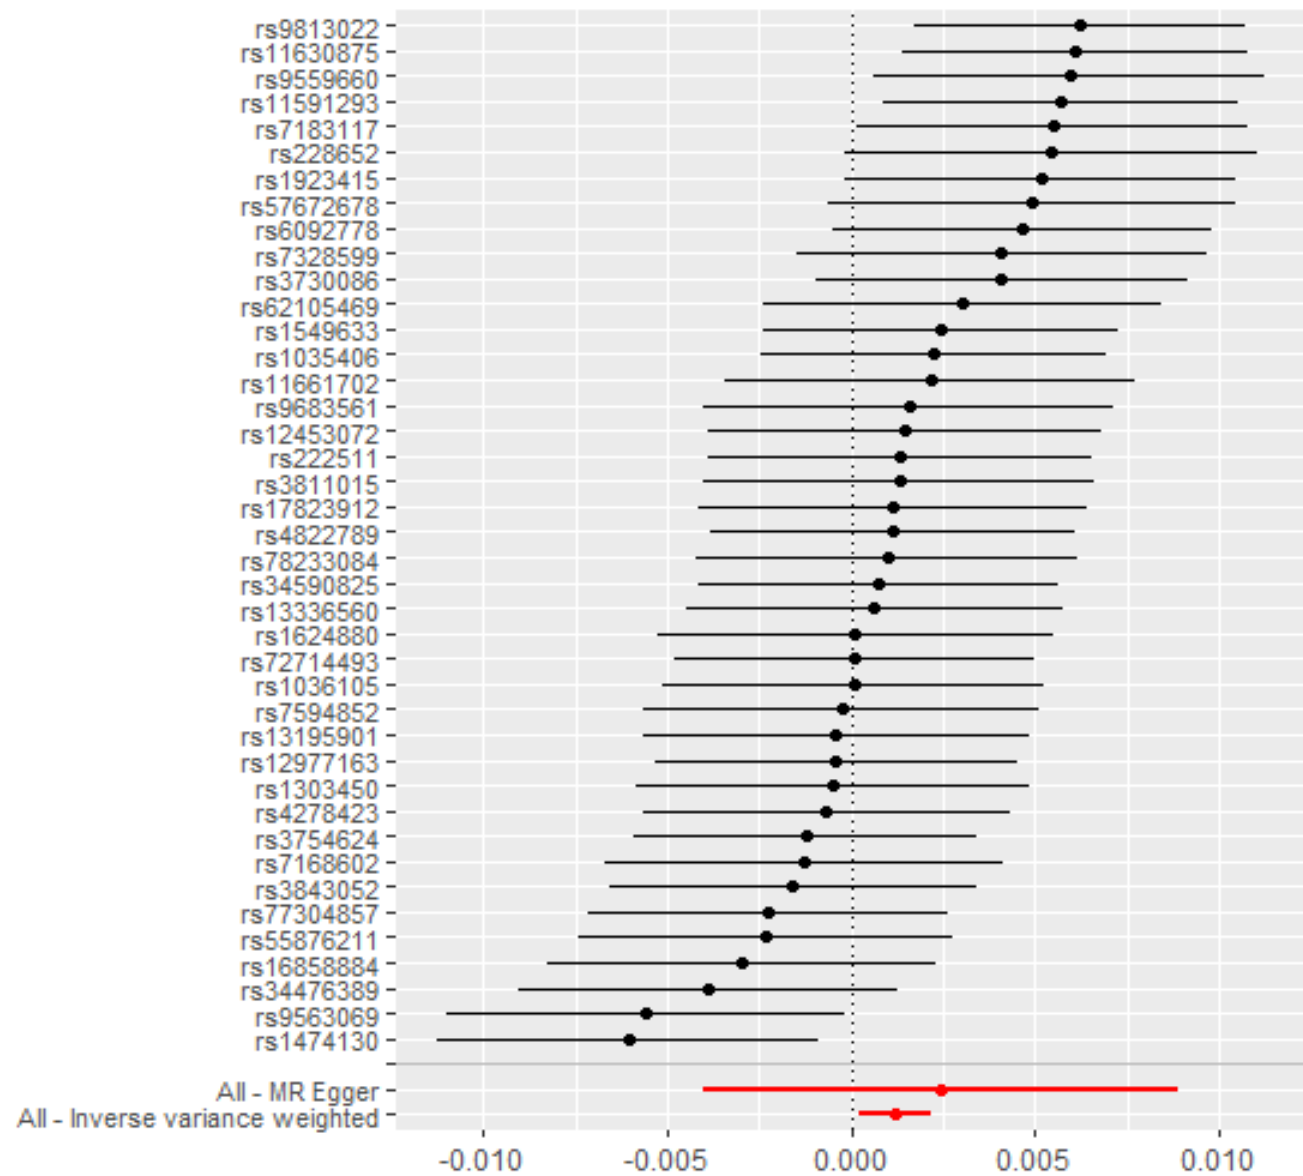

' || id:ebi-a-GCST90017106' on 'Diagnoses - main ICD10: K22.1 Ulcer of oesophagus || id:ukb-

Effect on Diagnoses - main ICD10: K22.1 Ulcer of oesophagus || id:ukb-b-13731

### MR Test

- Inverse variance weighted
- MR Egger
- Simple mode
- Weighted median
- Weighted mode

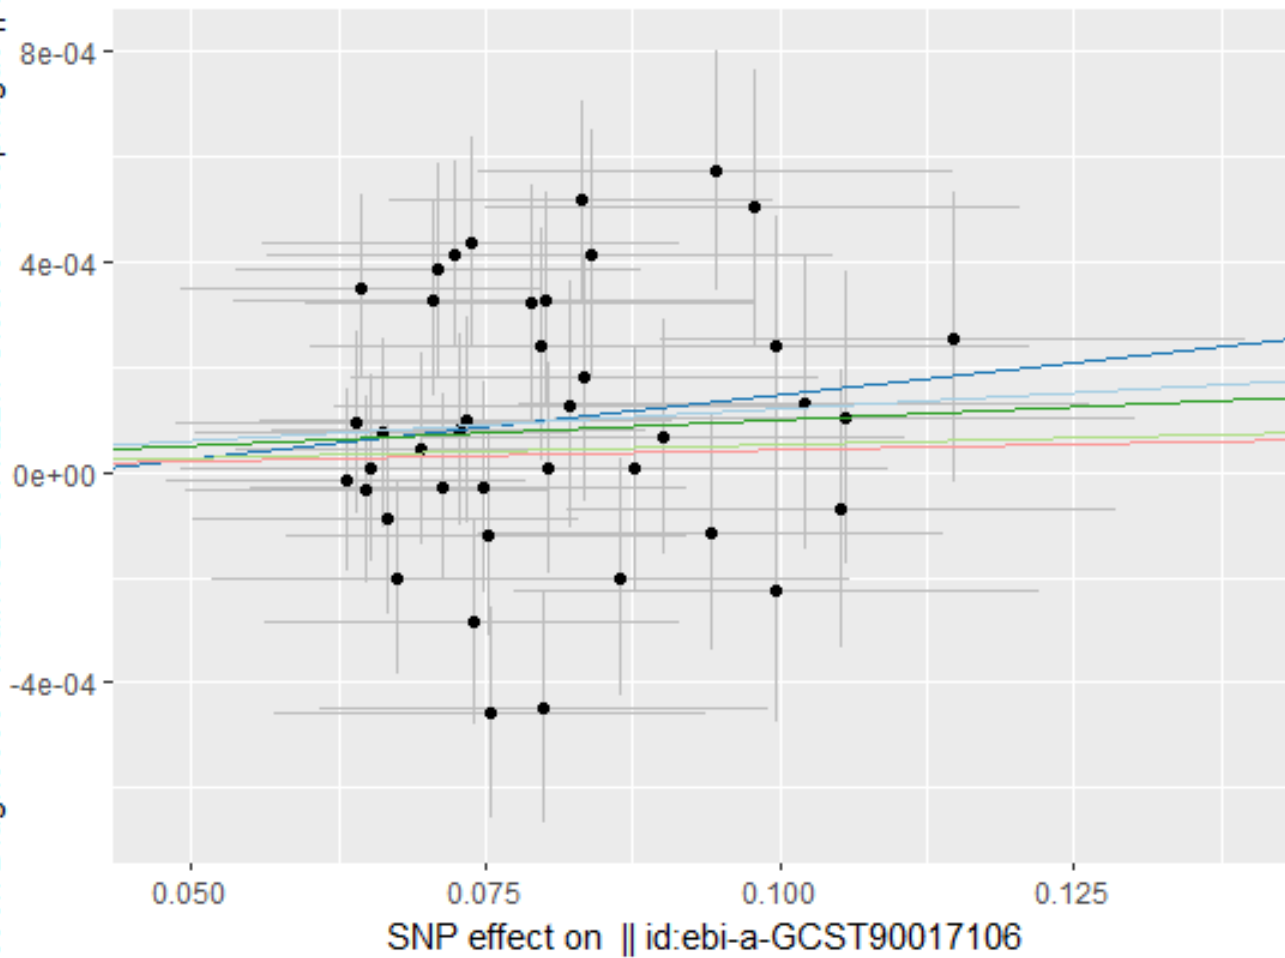

**Figure 38** Leave-one-out analysis, funnel plot, MR effect size and scatter plot for gut microbiota abundance (phylum Cyanobacteria id.1500) on ulcer of oesophagus

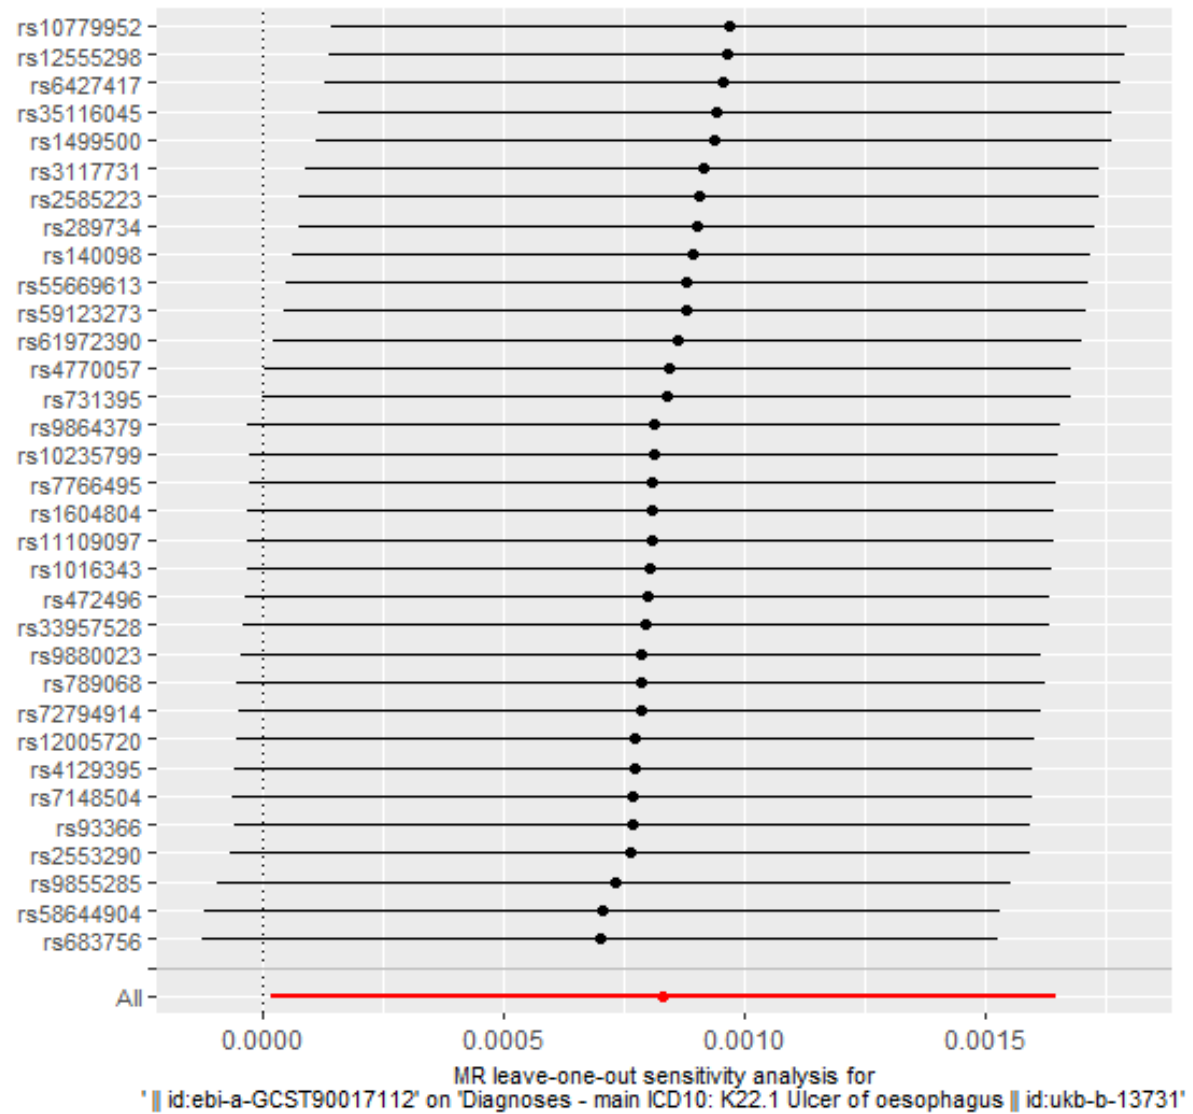

MR Method

- Inverse variance weighted
- MR Egger

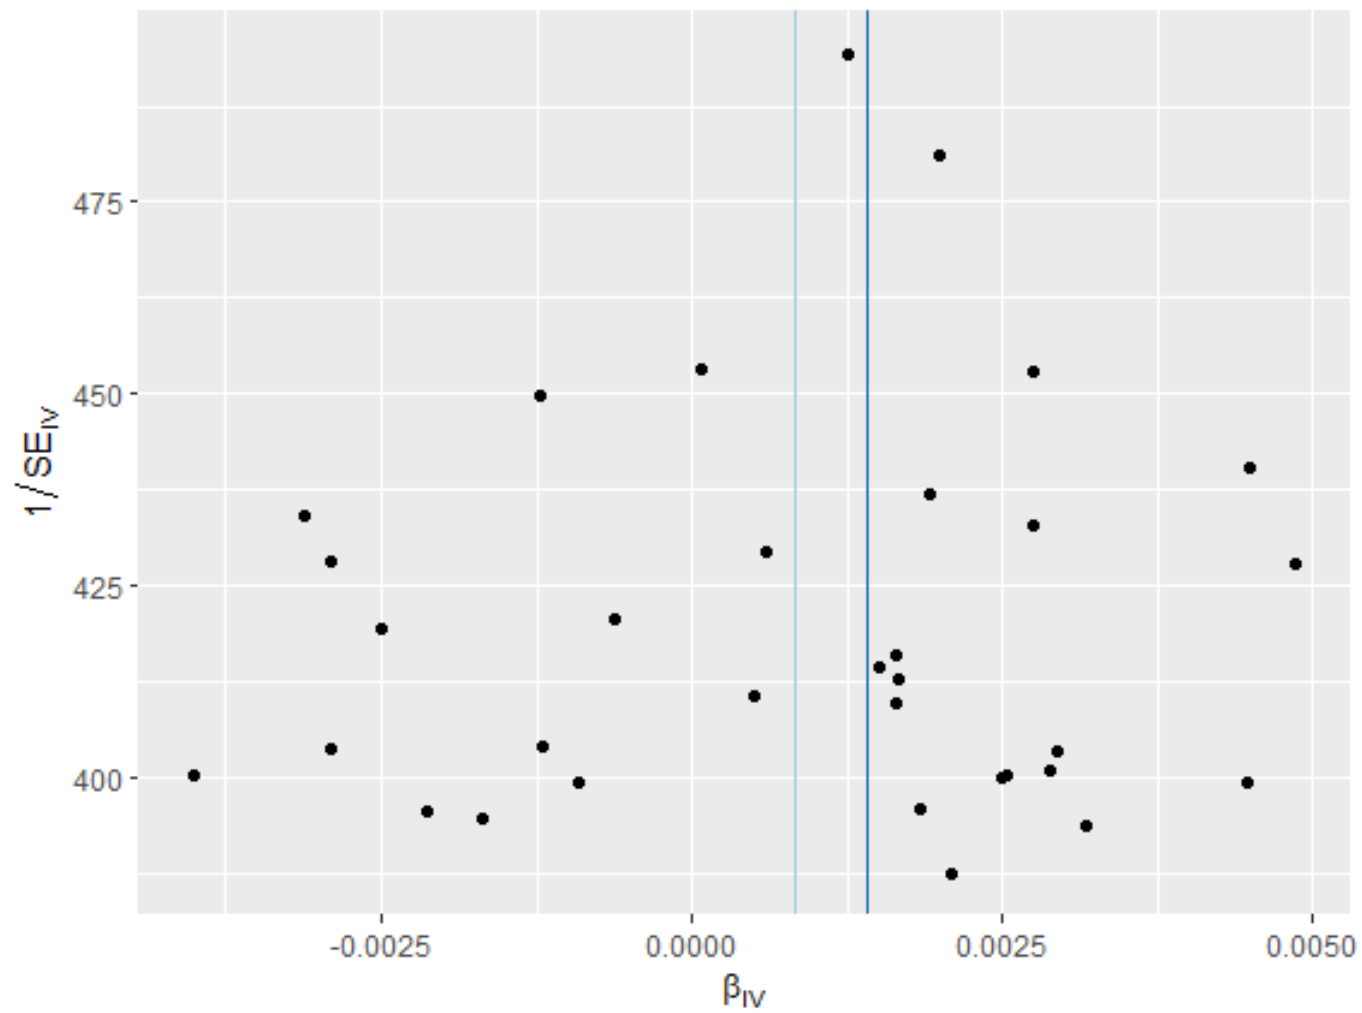

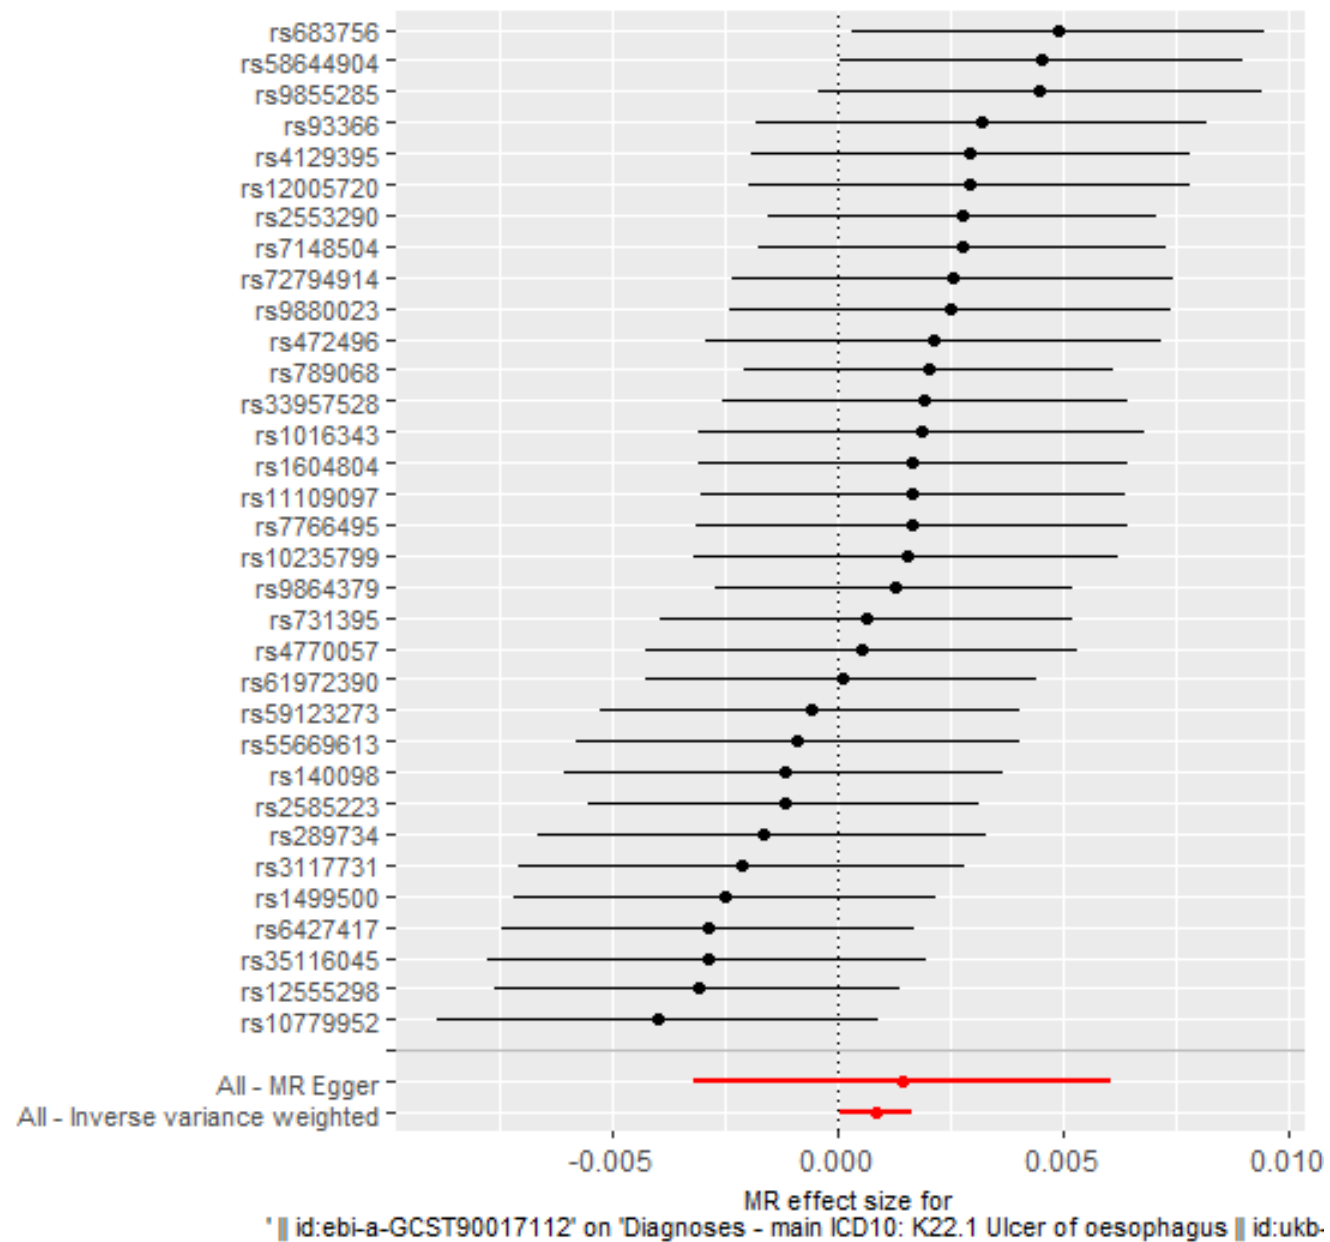

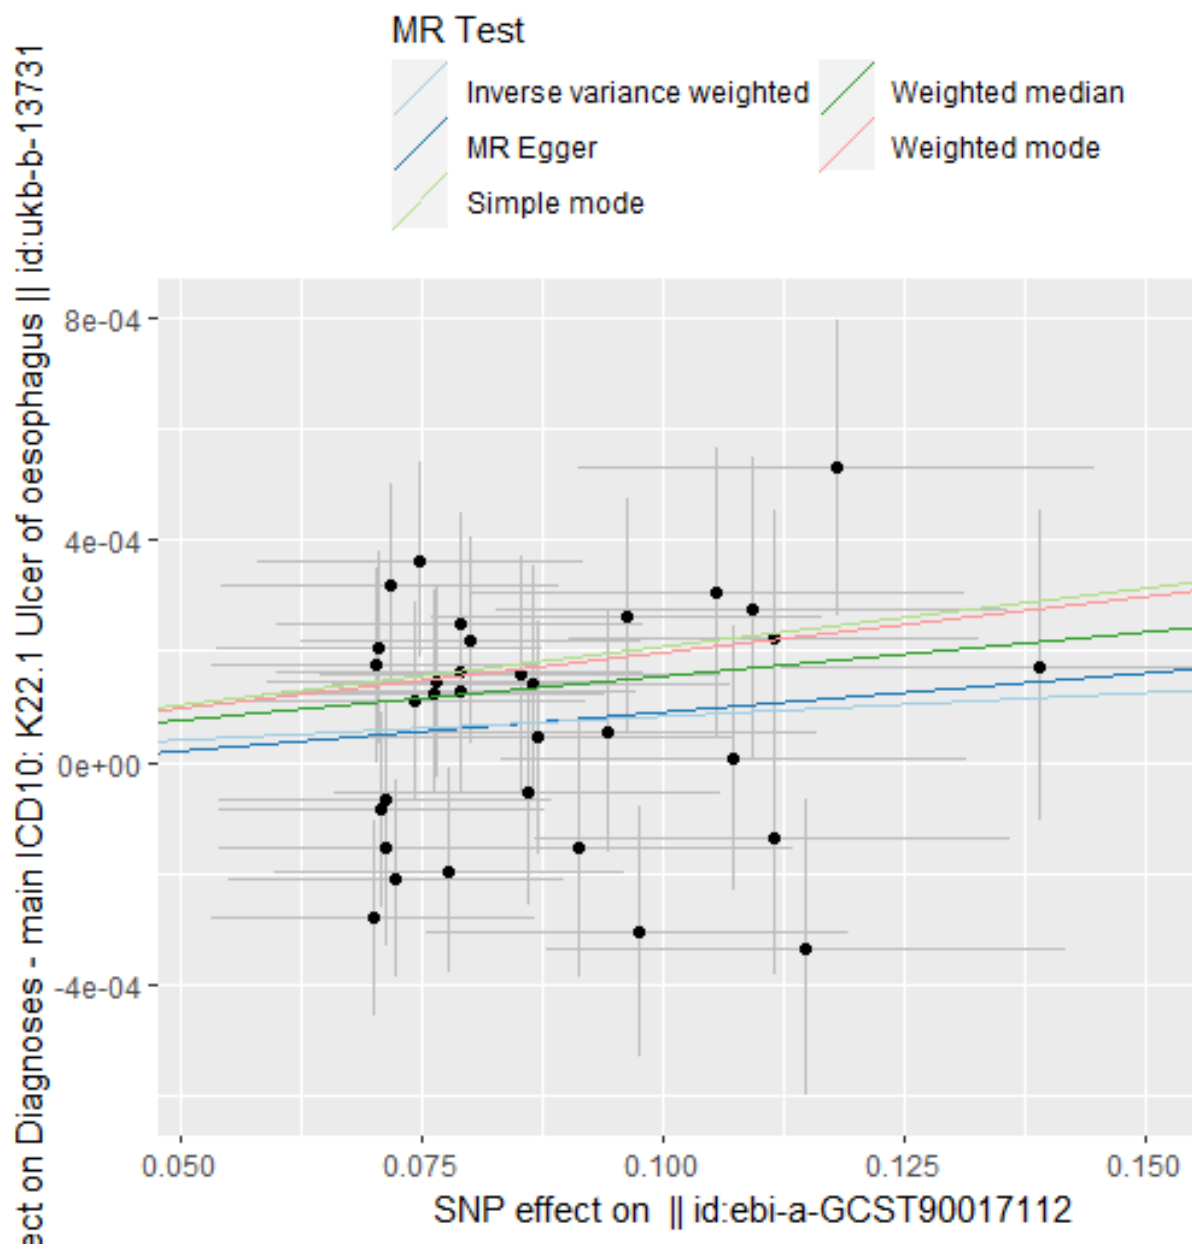



**Figure 39** Leave-one-out analysis, funnel plot, MR effect size and scatter plot for gut microbiota abundance (class Bacilli id.1673) on gastric ulcer

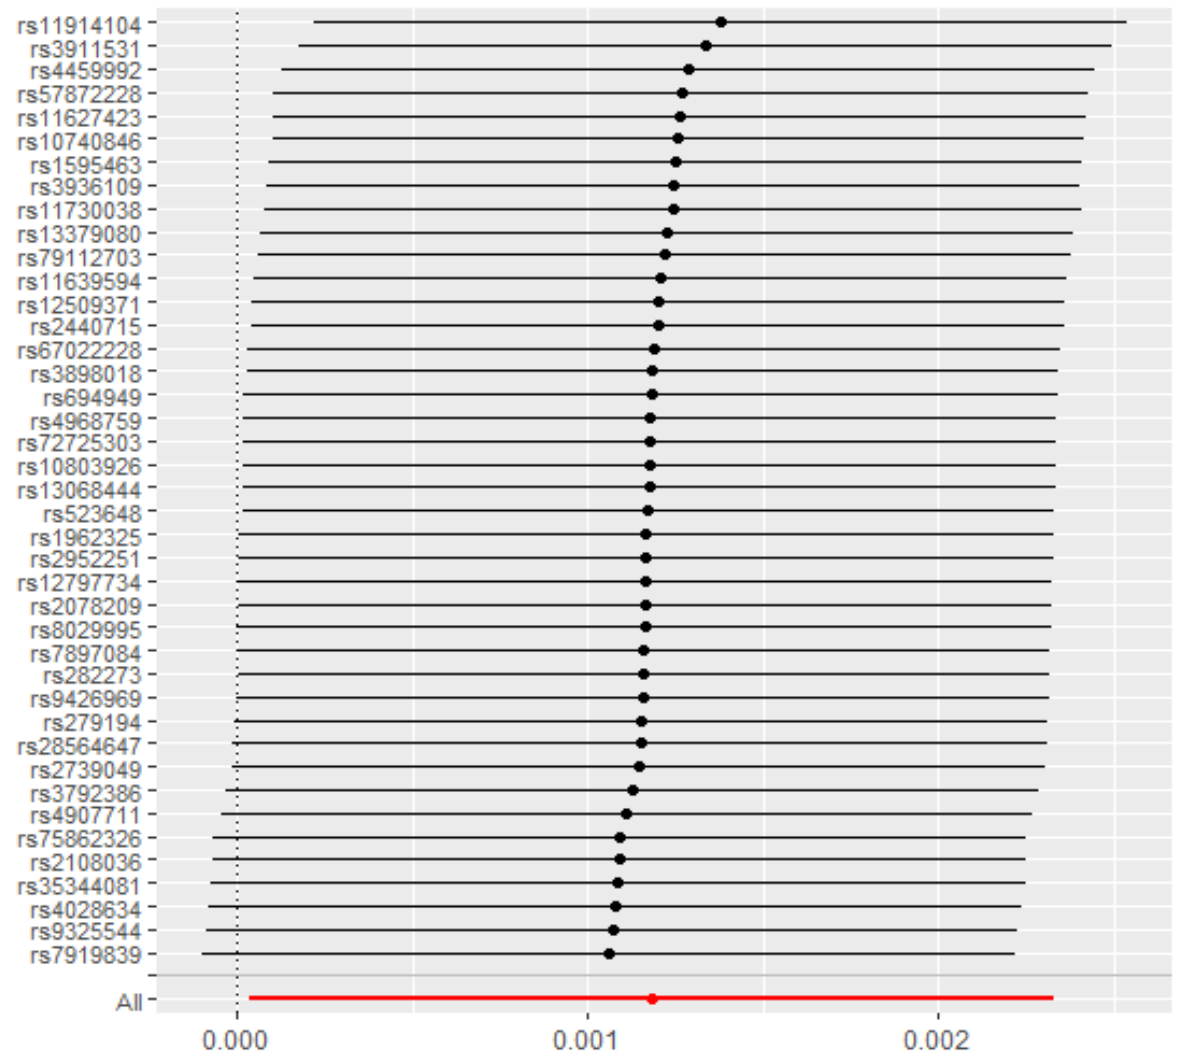

MR leave-one-out sensitivity analysis for  
' || id:ebi-a-GCST90016910' on 'Non-cancer illness code, self-reported: gastric/stomach ulcers || id:ukb-b-20

MR Method

- Inverse variance weighted
- MR Egger

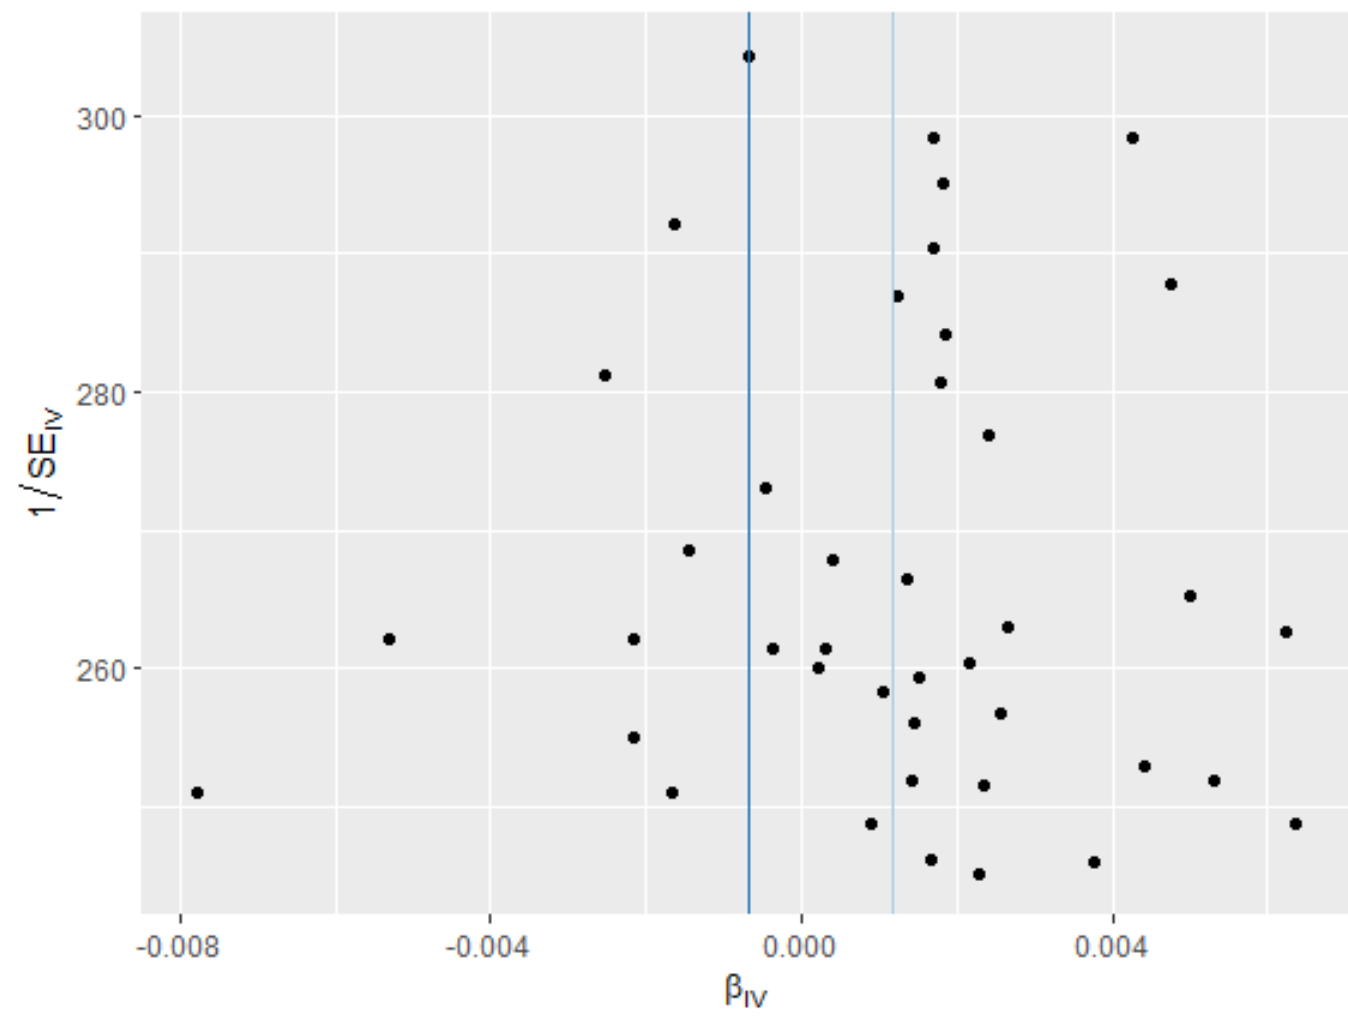

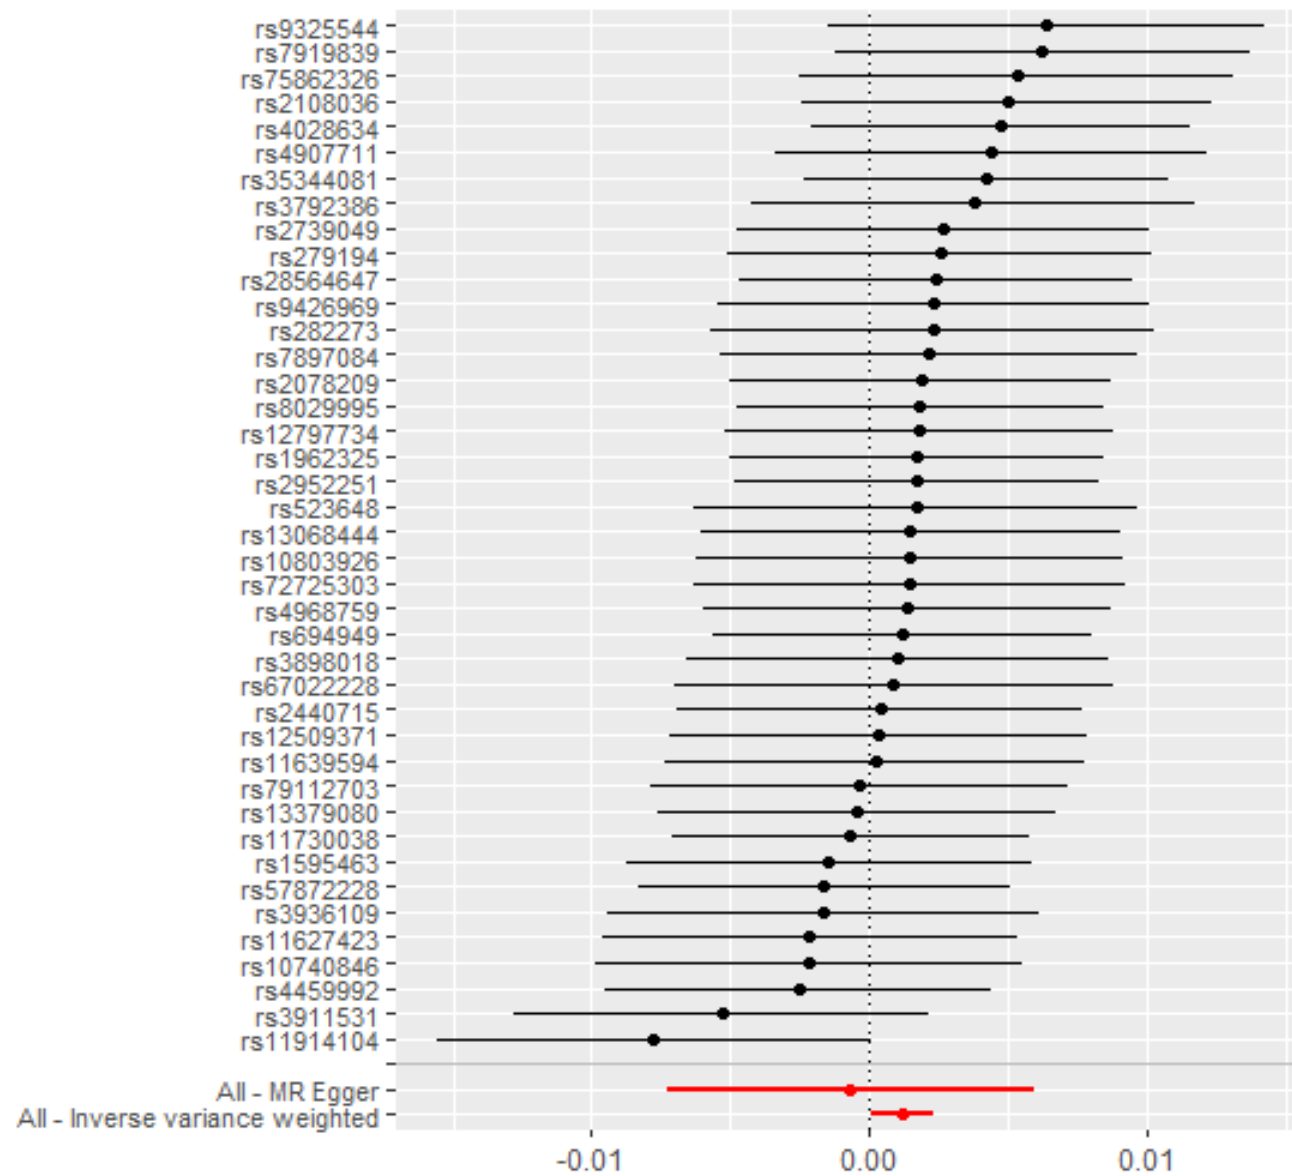

MR effect size for  
' || id:ebi-a-GCST90016910' on 'Non-cancer illness code, self-reported: gastric/stomach ulcers' || k

n Non-cancer illness code, self-reported: gastric/stomach ulcers || id:ukb-b-2007E

### MR Test

- Inverse variance weighted
- MR Egger
- Simple mode
- Weighted median
- Weighted mode

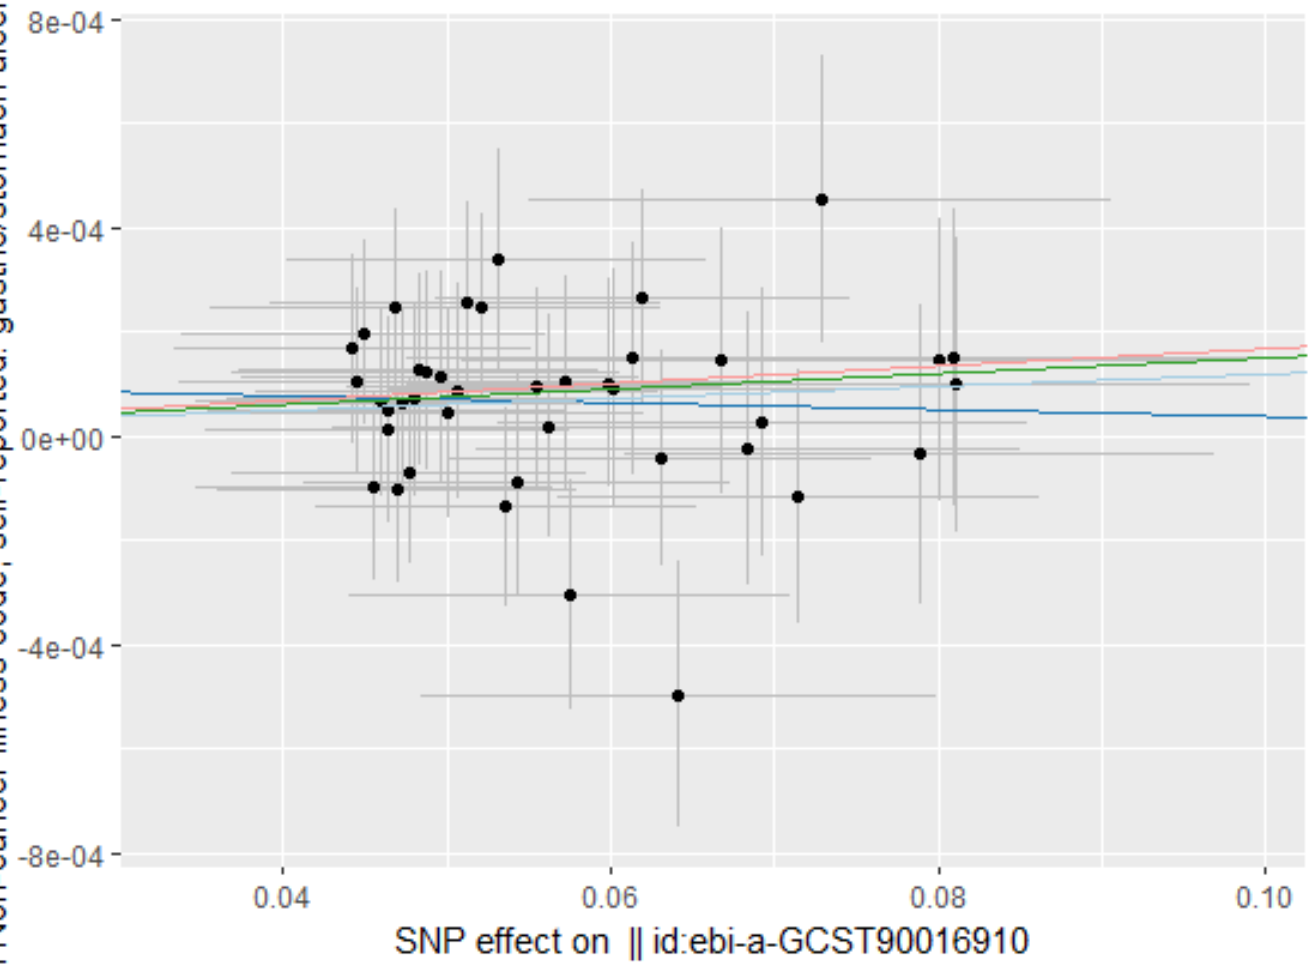

**Figure 40** Leave-one-out analysis, funnel plot, MR effect size and scatter plot for gut microbiota abundance (class Bacteroidia id.912) on gastric ulcer

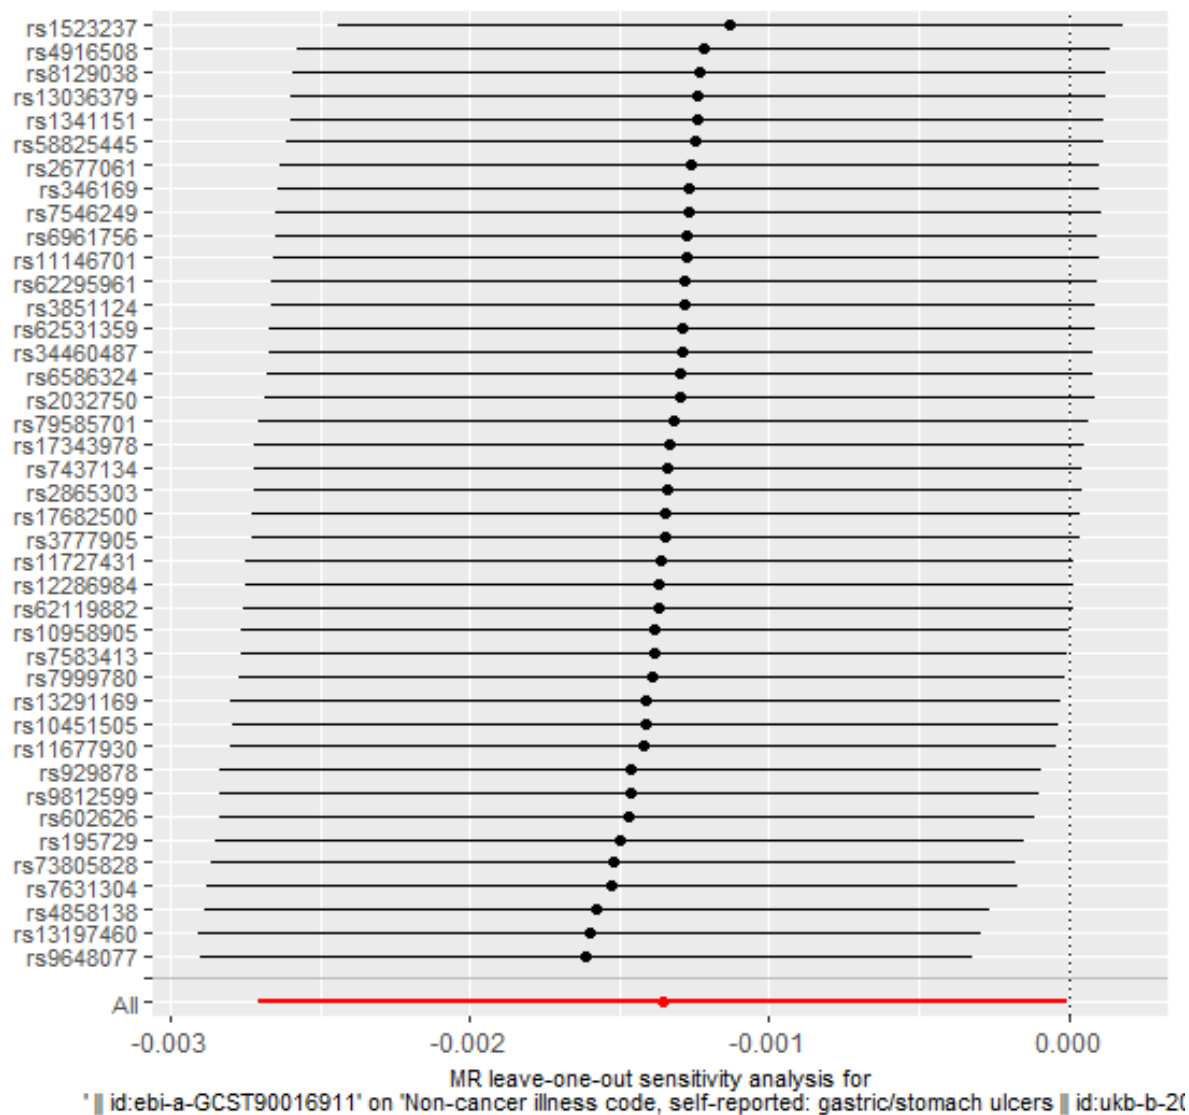

MR Method

- Inverse variance weighted
- MR Egger

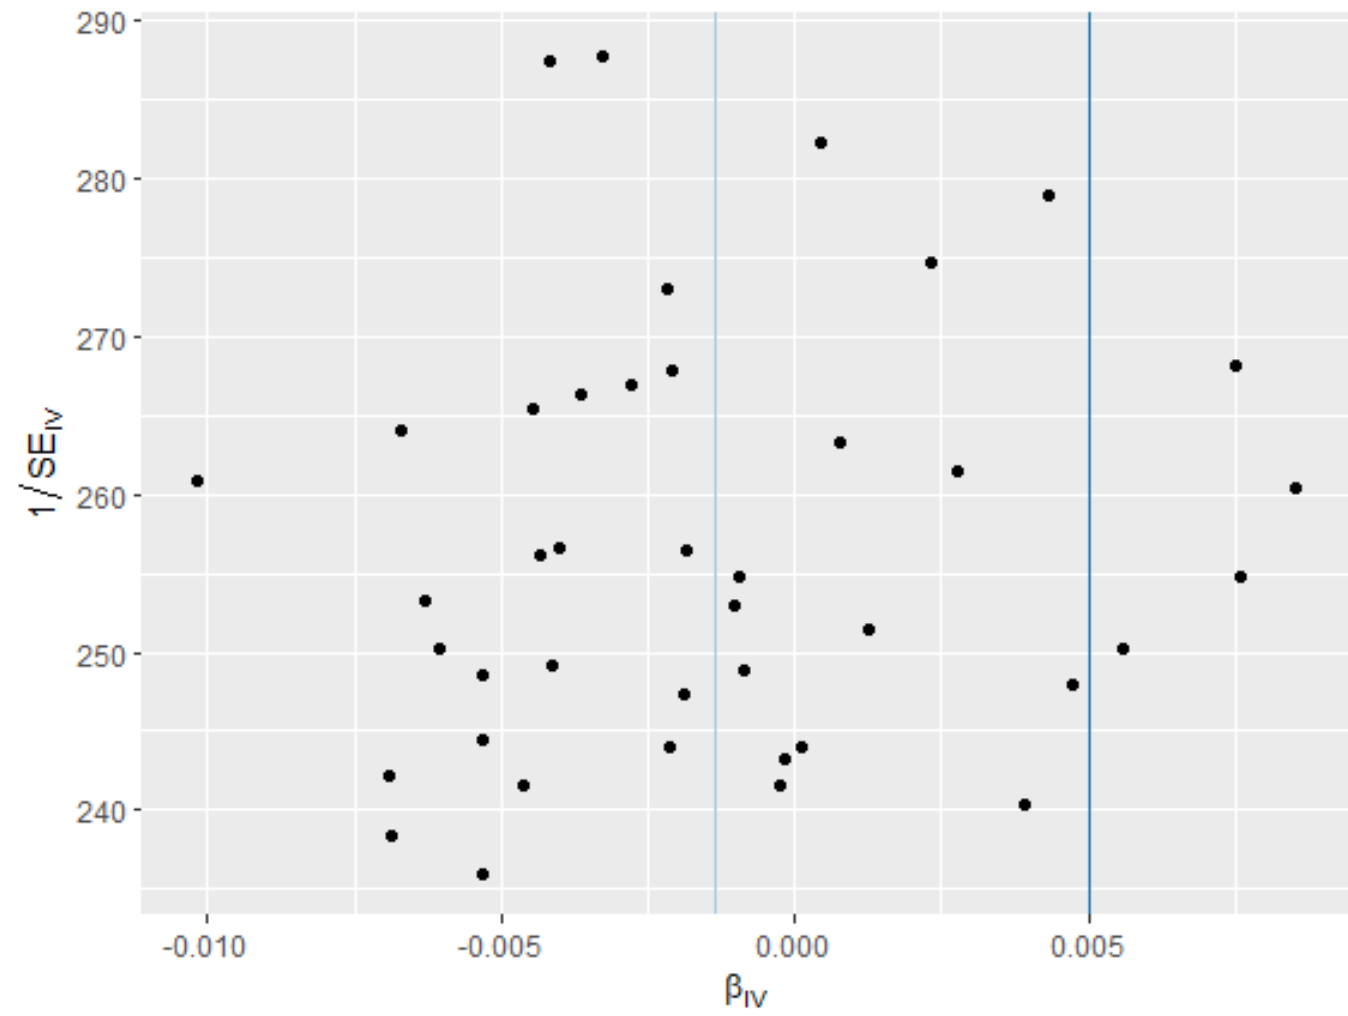

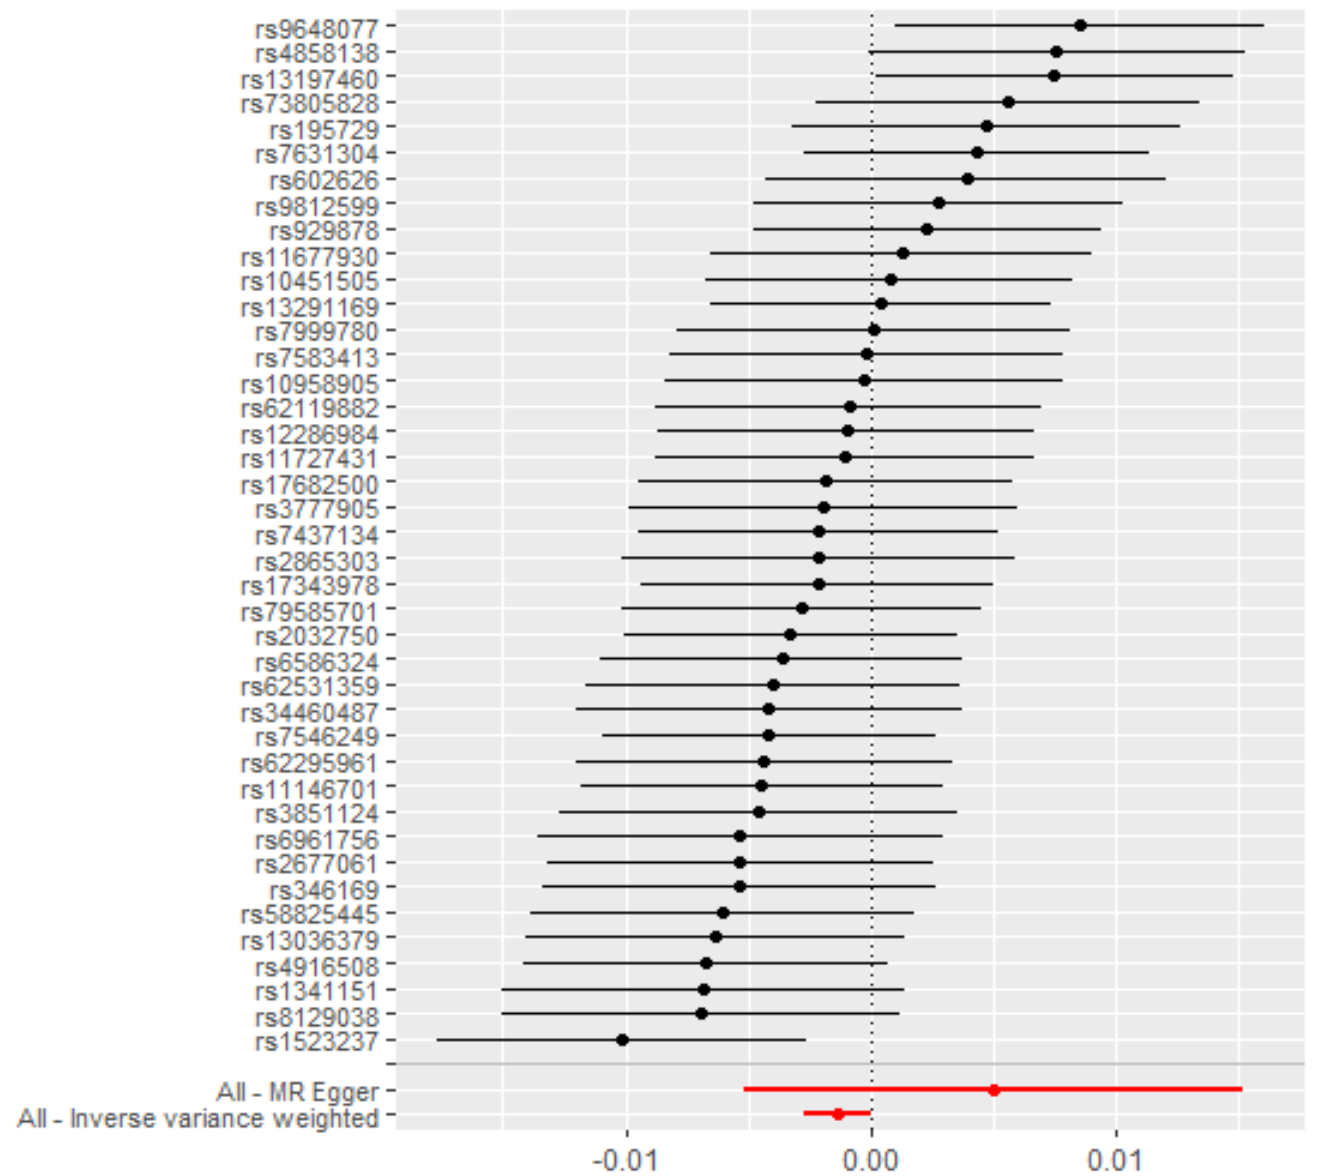

MR effect size for  
' || id:ebi-a-GCST90016911' on 'Non-cancer illness code, self-reported: gastric/stomach ulcers || k

n Non-cancer illness code, self-reported: gastric/stomach ulcers || id:ukb-b-2007E

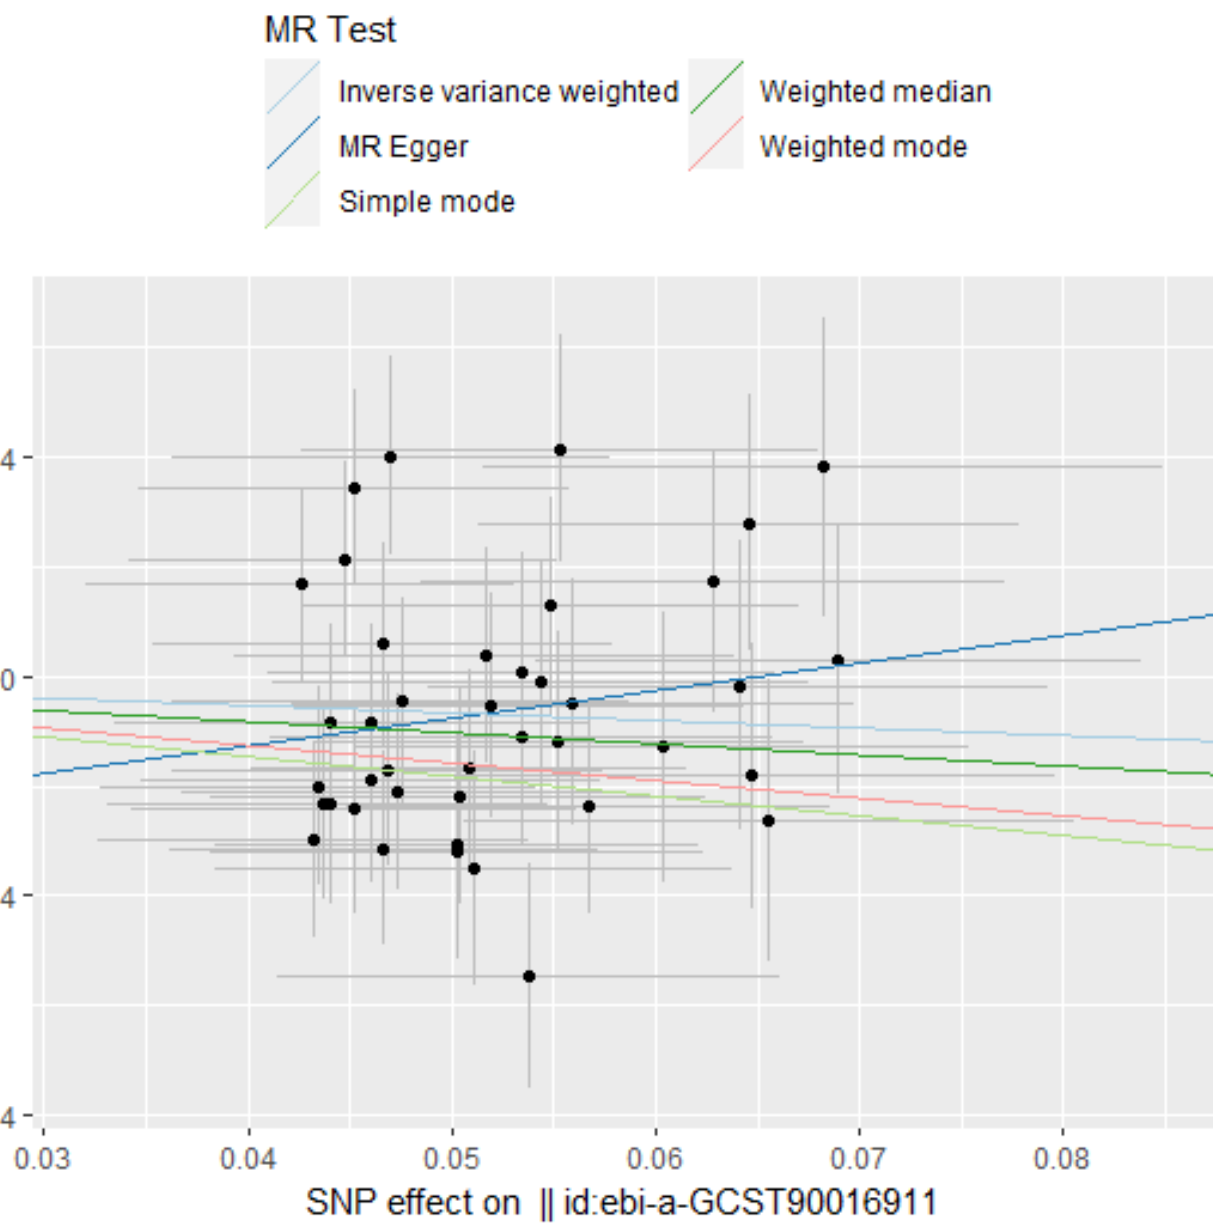



**Figure 41** Leave-one-out analysis, funnel plot, MR effect size and scatter plot for gut microbiota abundance (class *Lentisphaeria* id.2250) on gastric ulcer

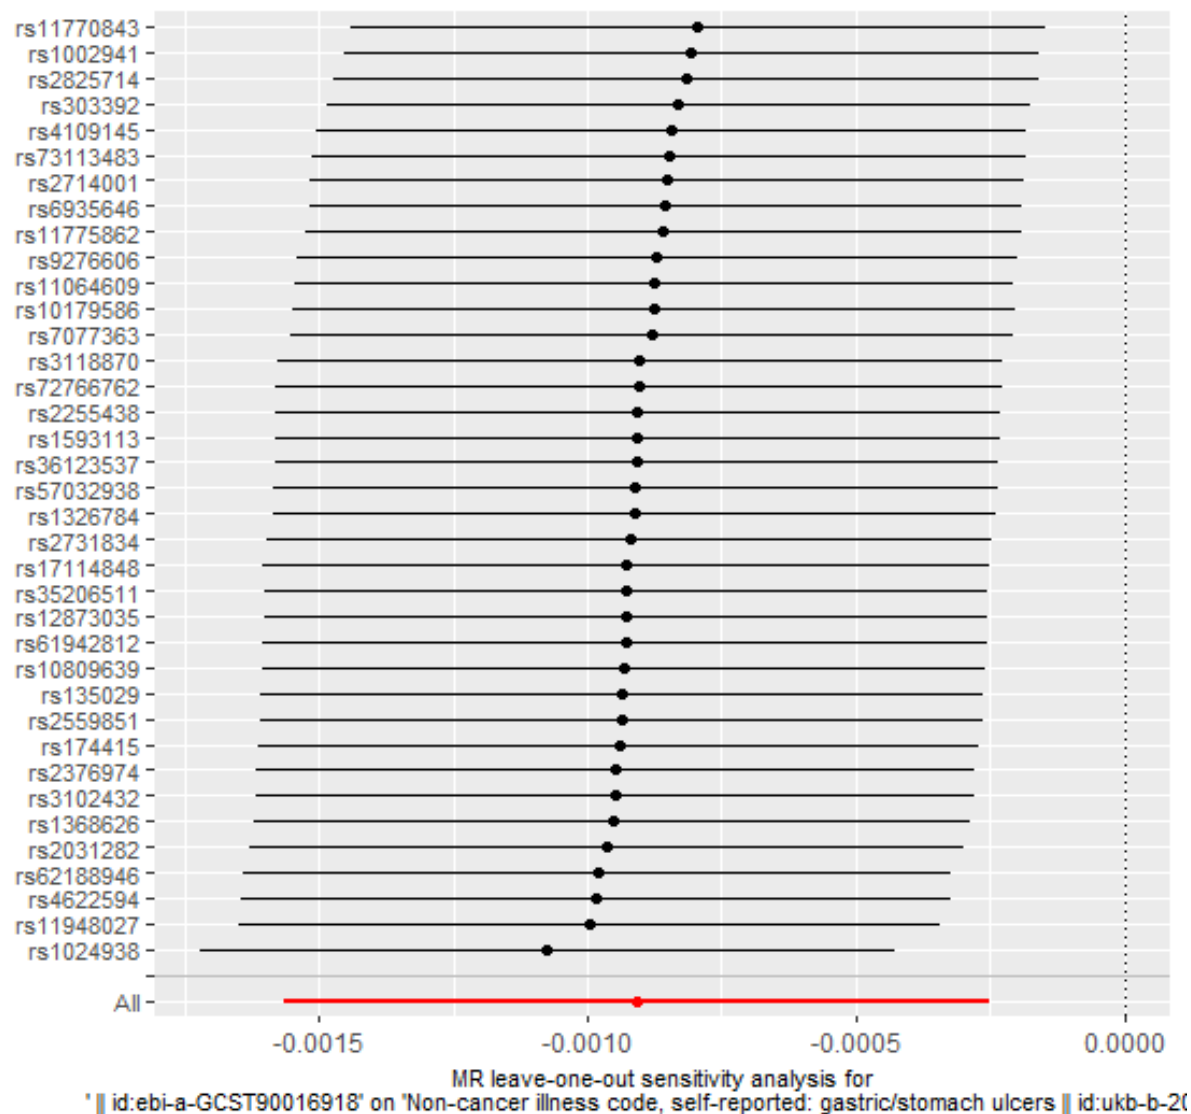

MR Method

- Inverse variance weighted
- MR Egger

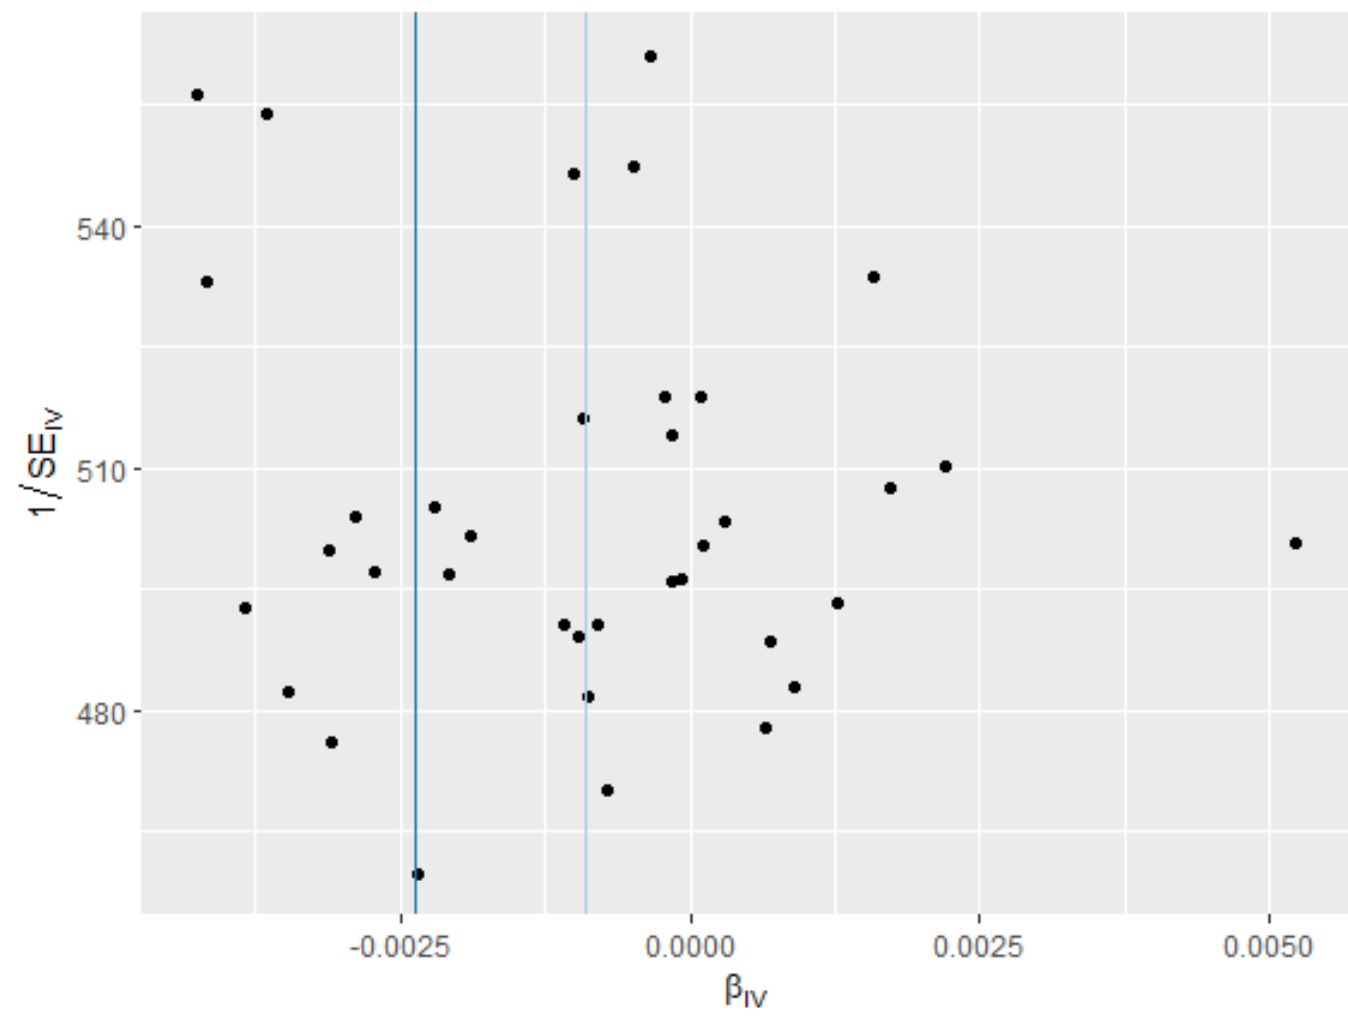

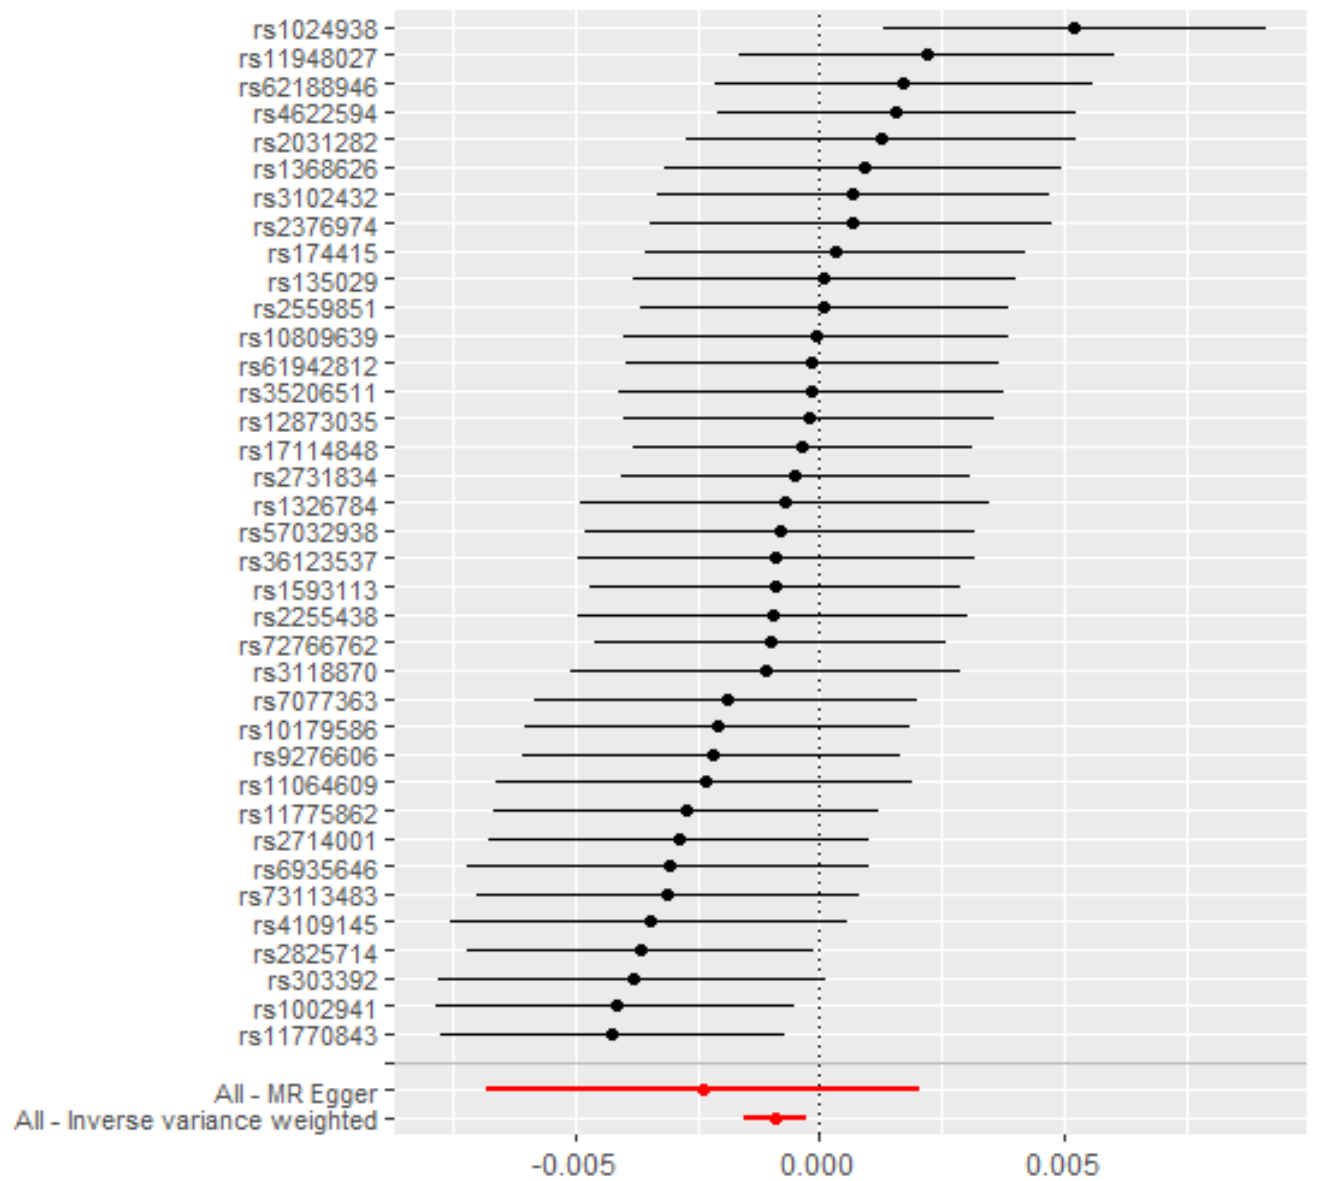

MR effect size for  
 ' || id:ebi-a-GCST90016918' on 'Non-cancer illness code, self-reported: gastric/stomach ulcers || k

n Non-cancer illness code, self-reported: gastric/stomach ulcers || id:ukb-b-2007E

### MR Test

- Inverse variance weighted
- MR Egger
- Simple mode
- Weighted median
- Weighted mode

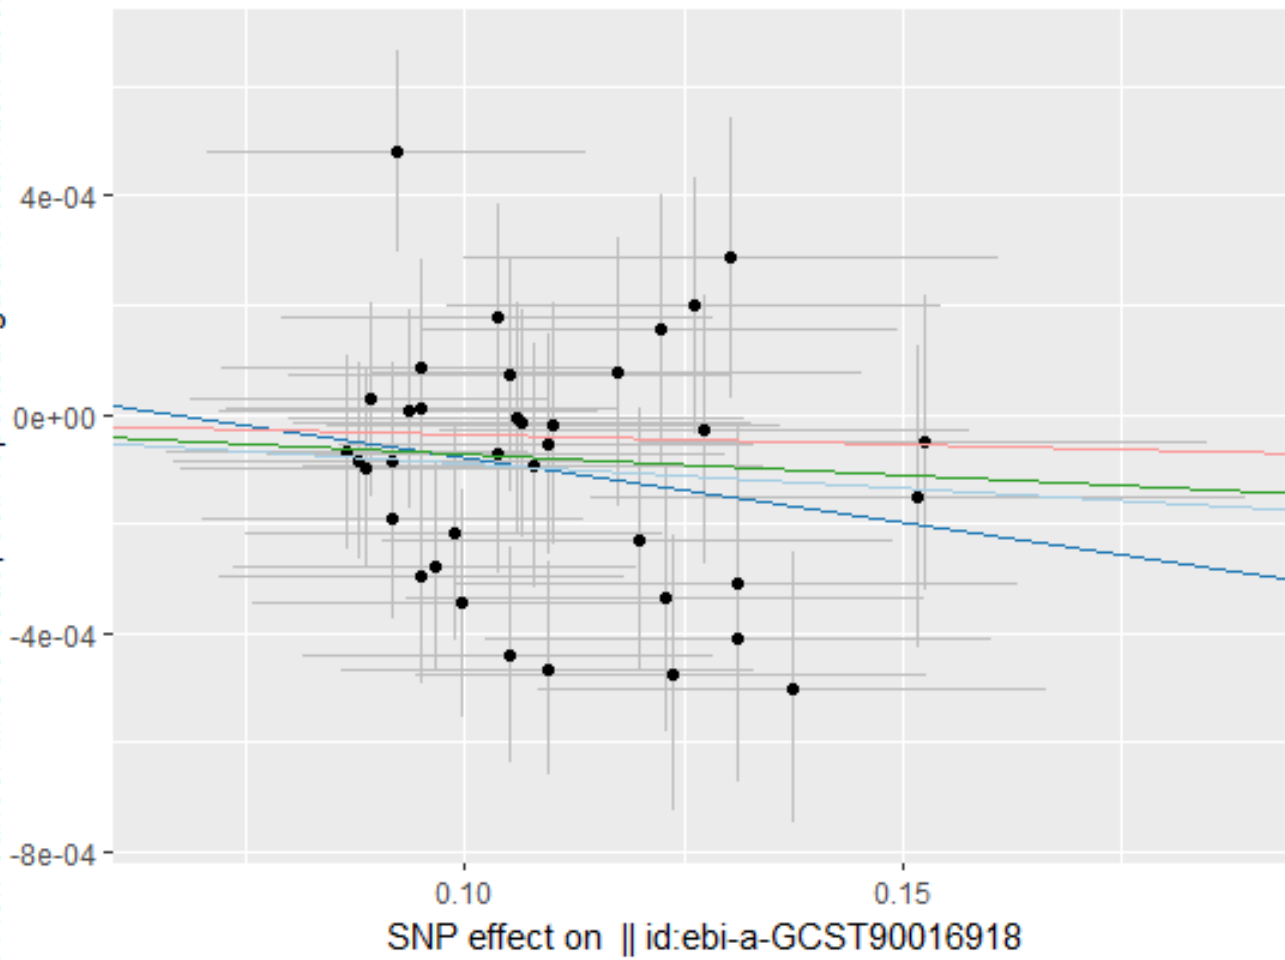

**Figure 42** Leave-one-out analysis, funnel plot, MR effect size and scatter plot for gut microbiota abundance (genus *Butyrivibrio* id.1993) on gastric ulcer

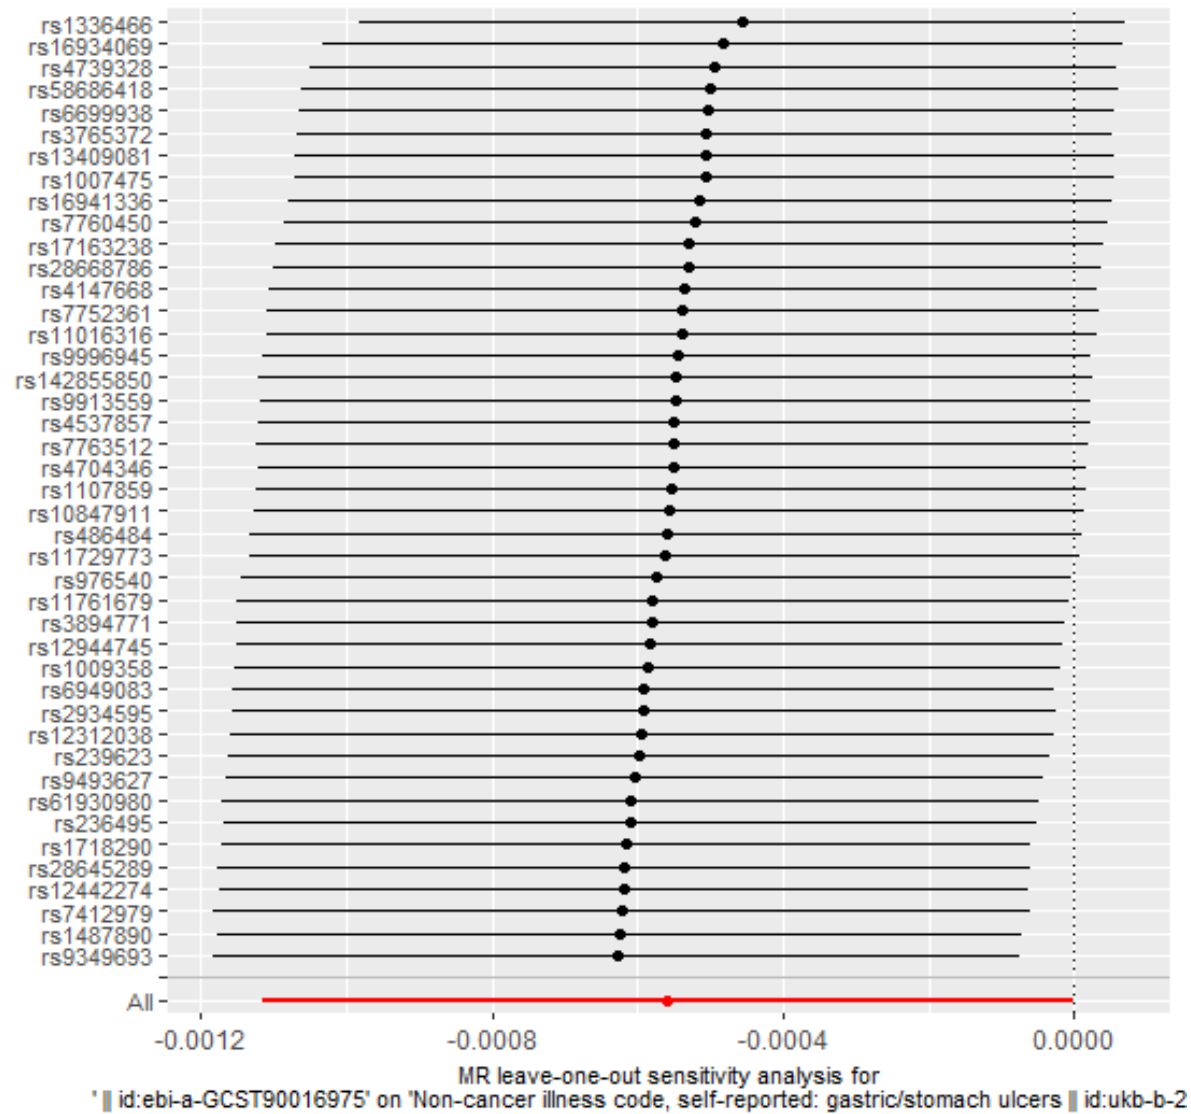

MR Method

- Inverse variance weighted
- MR Egger

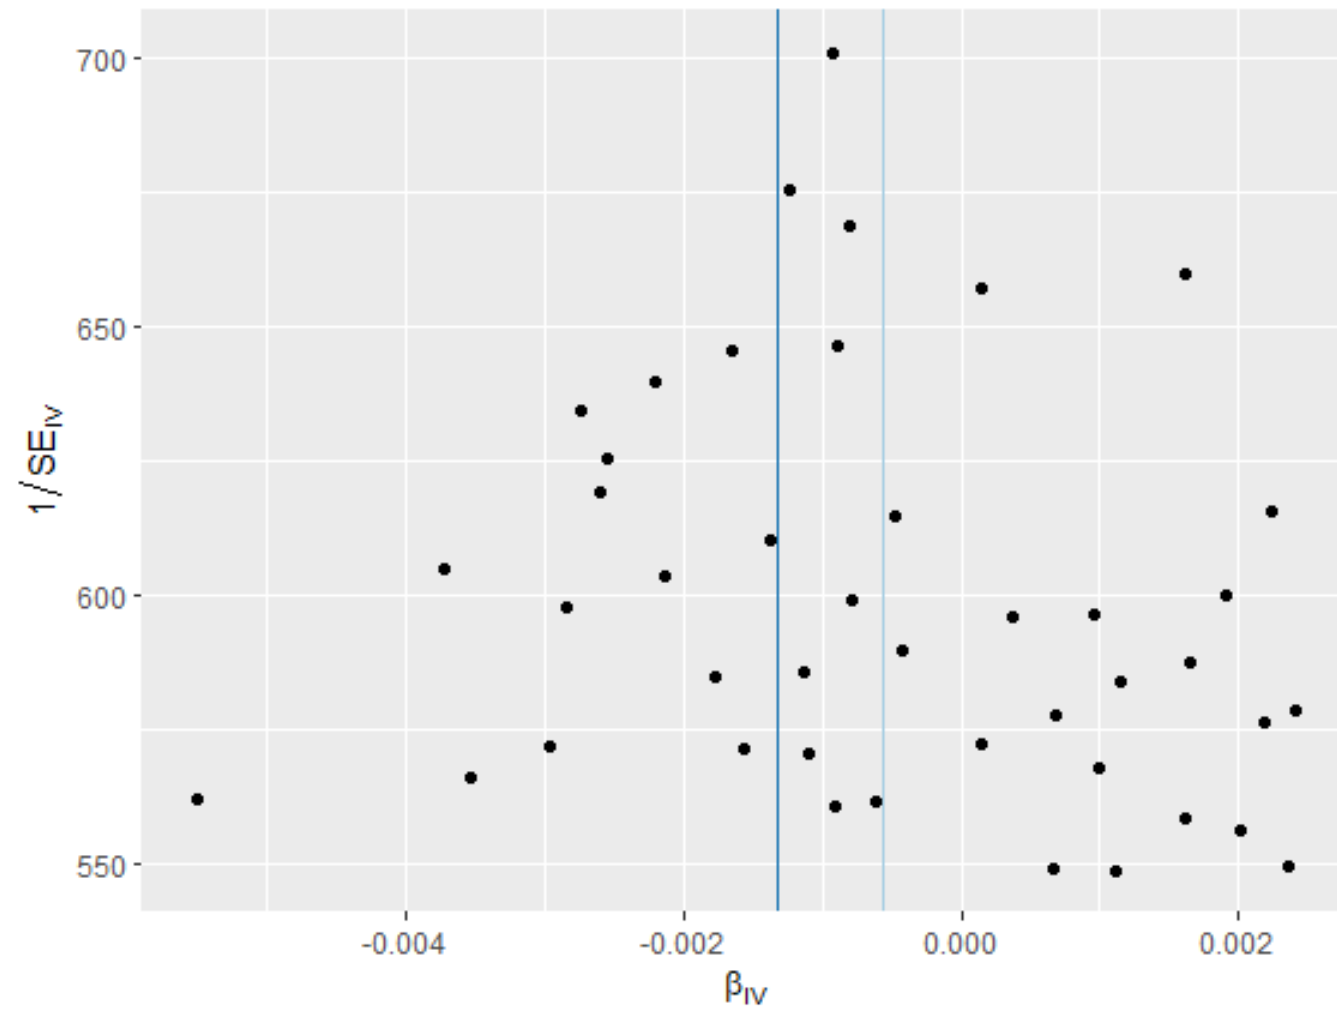

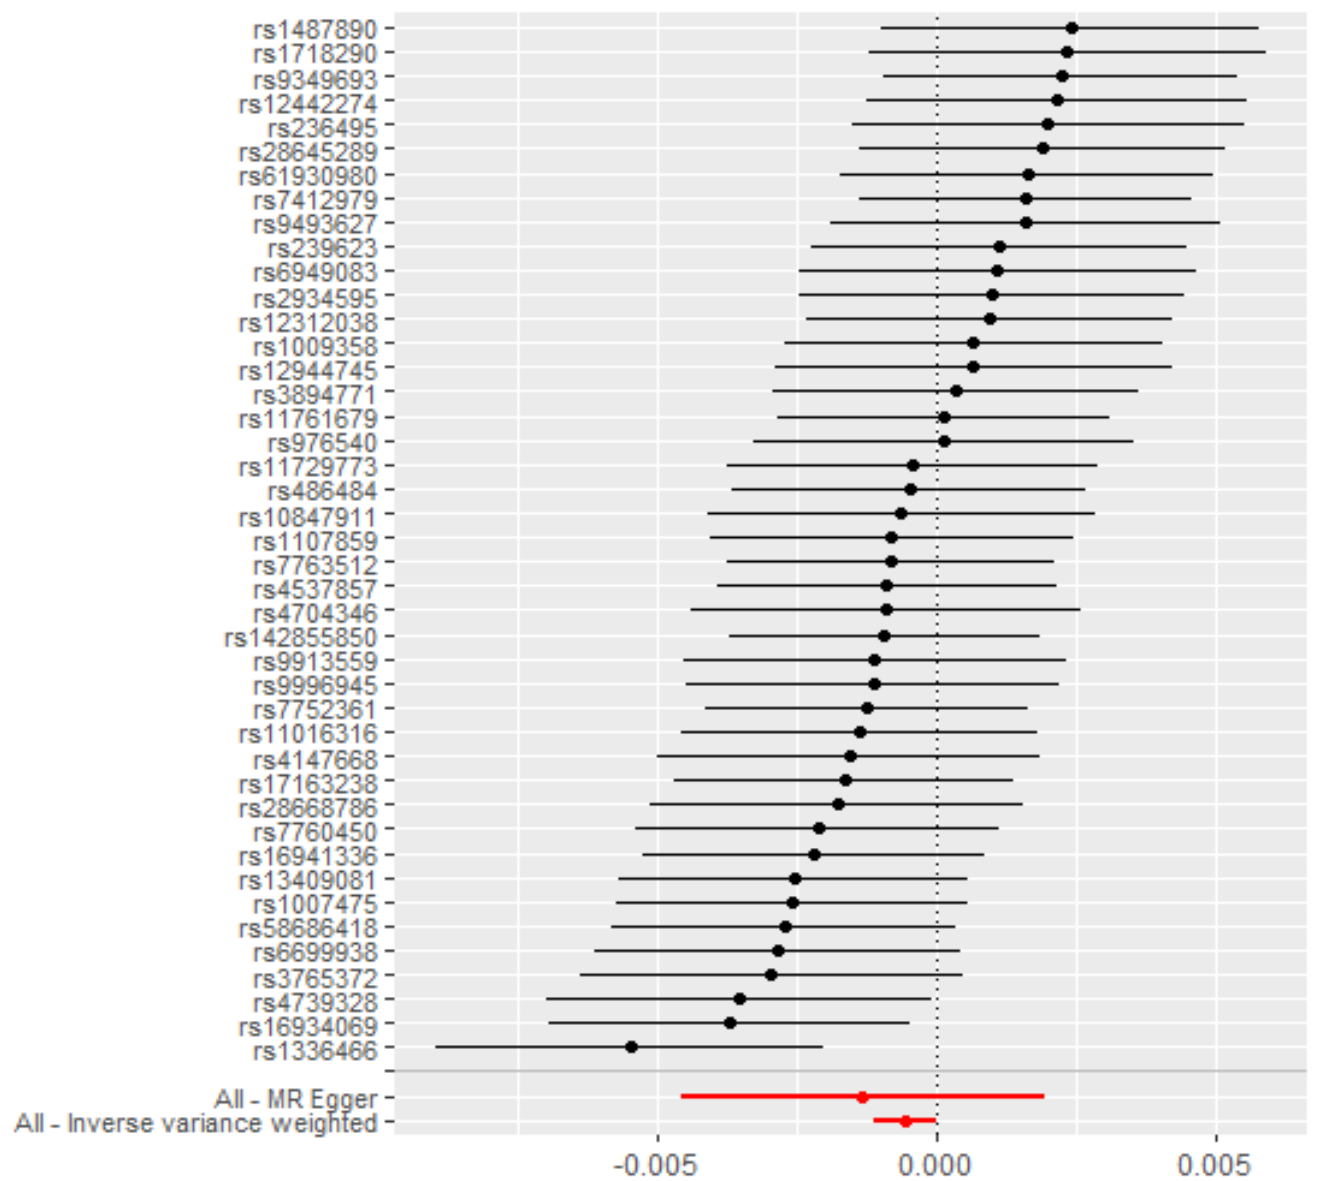

MR effect size for  
 ' || id:ebi-a-GCST90016975' on 'Non-cancer illness code, self-reported: gastric/stomach ulcers || k

n Non-cancer illness code, self-reported: gastric/stomach ulcers || id:ukb-b-2007E

### MR Test

- Inverse variance weighted
- MR Egger
- Simple mode
- Weighted median
- Weighted mode

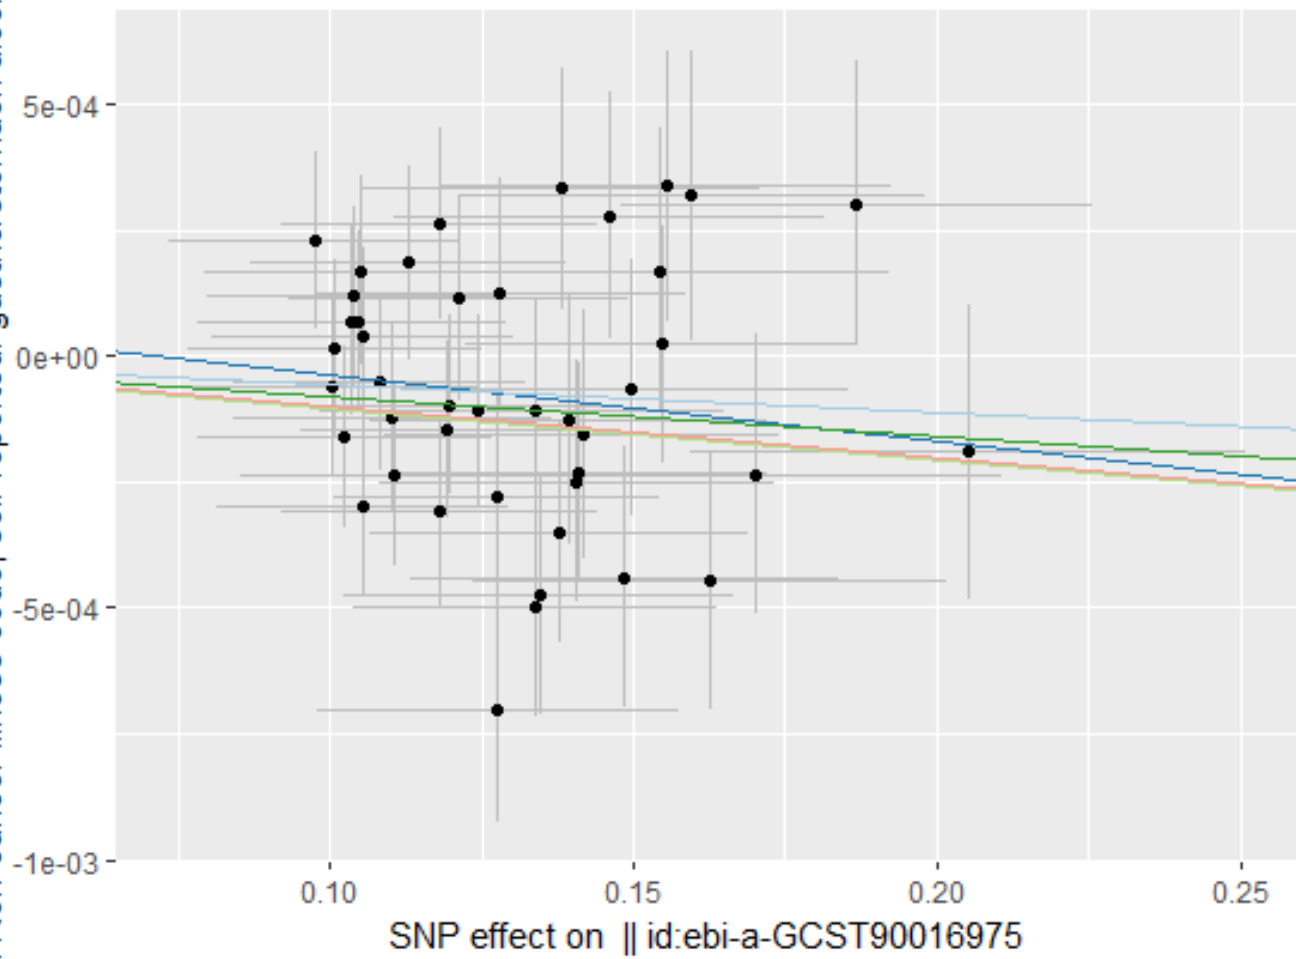



**Figure 43** Leave-one-out analysis, funnel plot, MR effect size and scatter plot for gut microbiota abundance (genus *Desulfovibrio* id.3173) on gastric ulcer

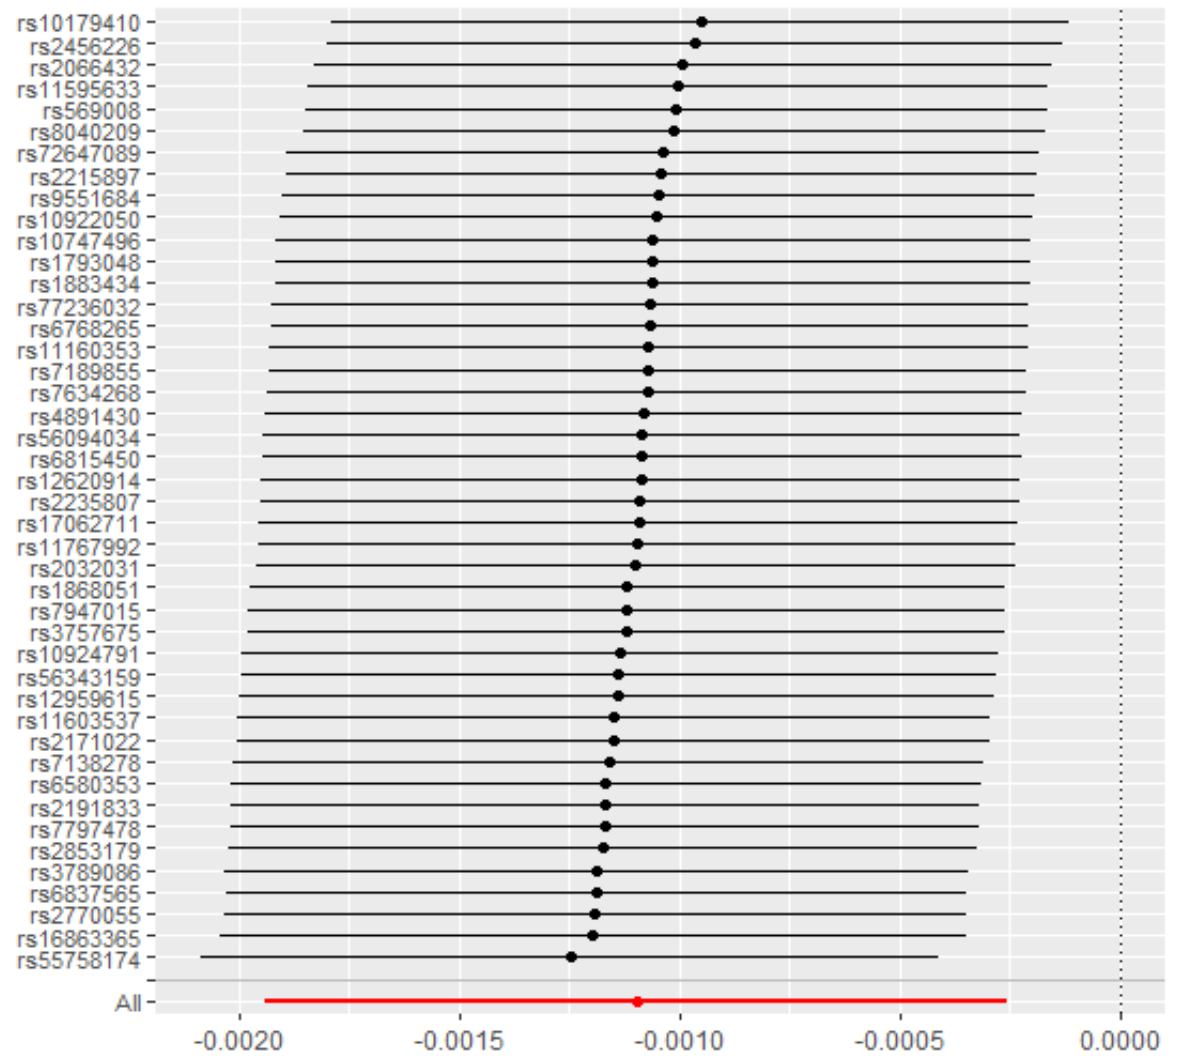

' || id:ebi-a-GCST90016987' on 'Non-cancer illness code, self-reported: gastric/stomach ulcers || id:ukb-b-20

MR Method

- Inverse variance weighted
- MR Egger

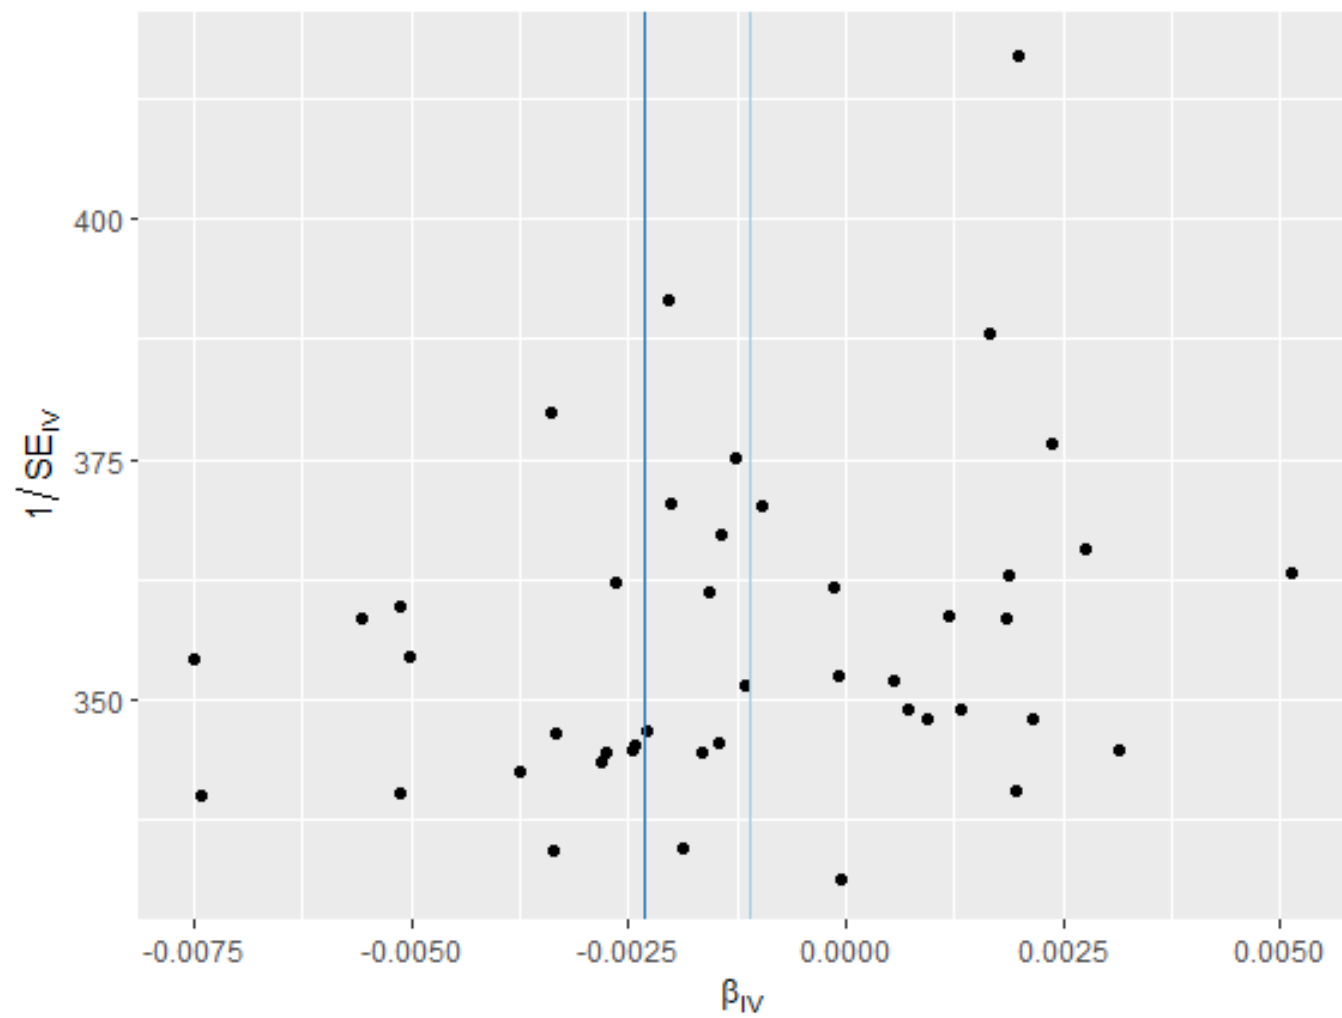

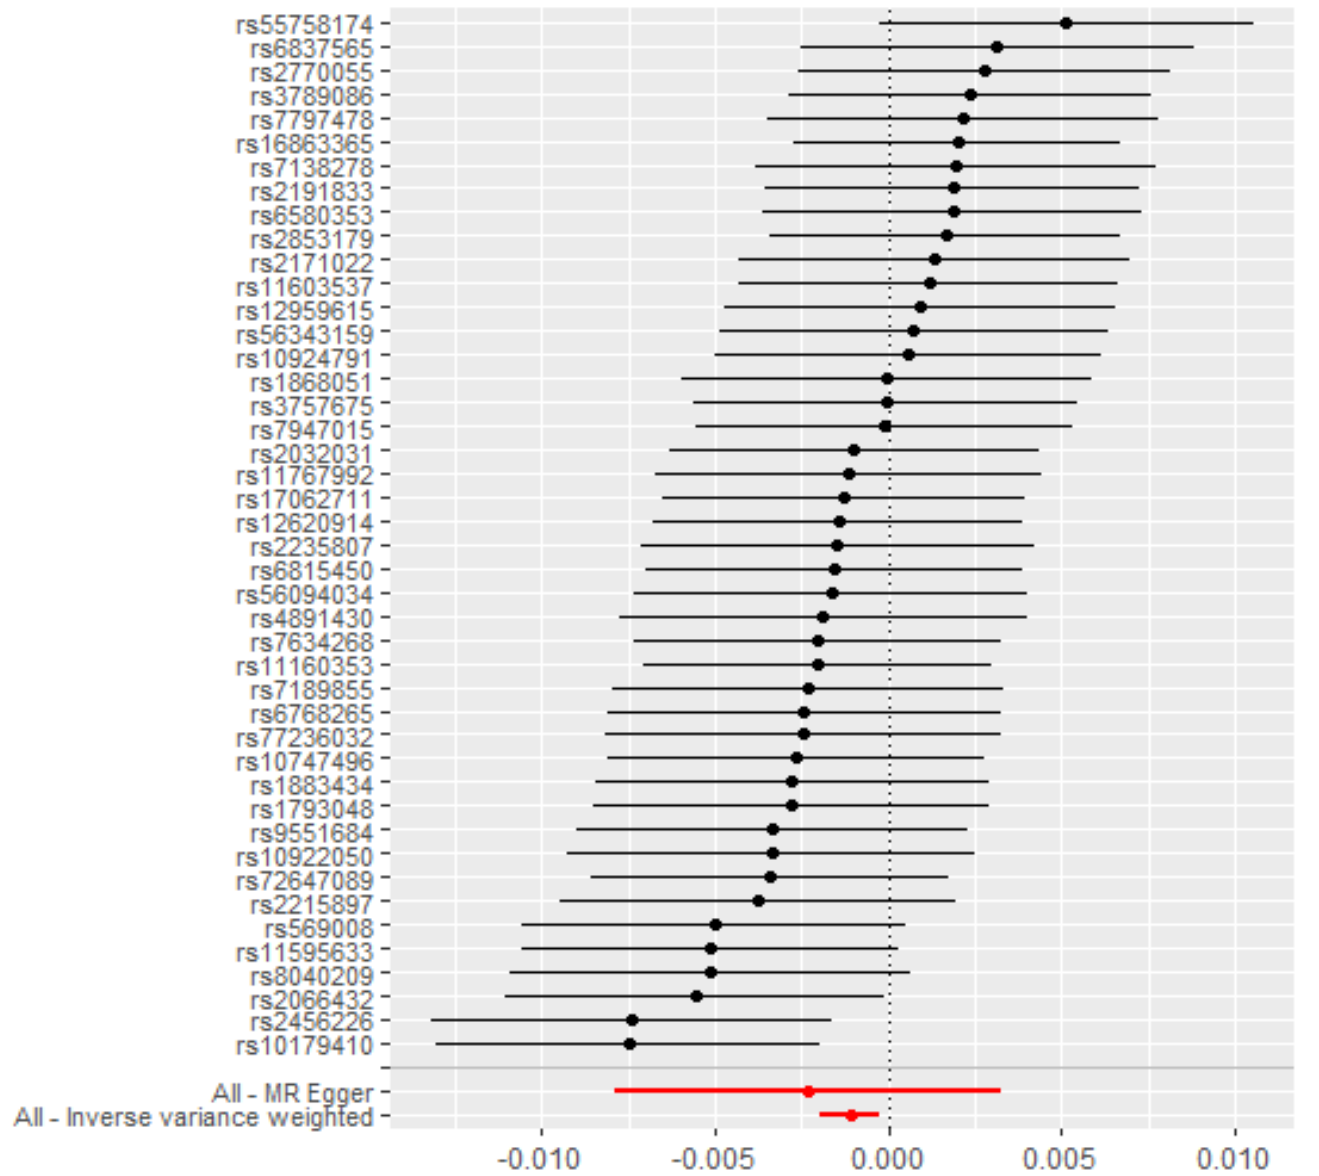

' || id:ebi-a-GCST90016987' on 'Non-cancer illness code, self-reported: gastric/stomach ulcers' || k

n Non-cancer illness code, self-reported: gastric/stomach ulcers || id:ukb-b-20078

### MR Test

- Inverse variance weighted
- MR Egger
- Simple mode
- Weighted median
- Weighted mode

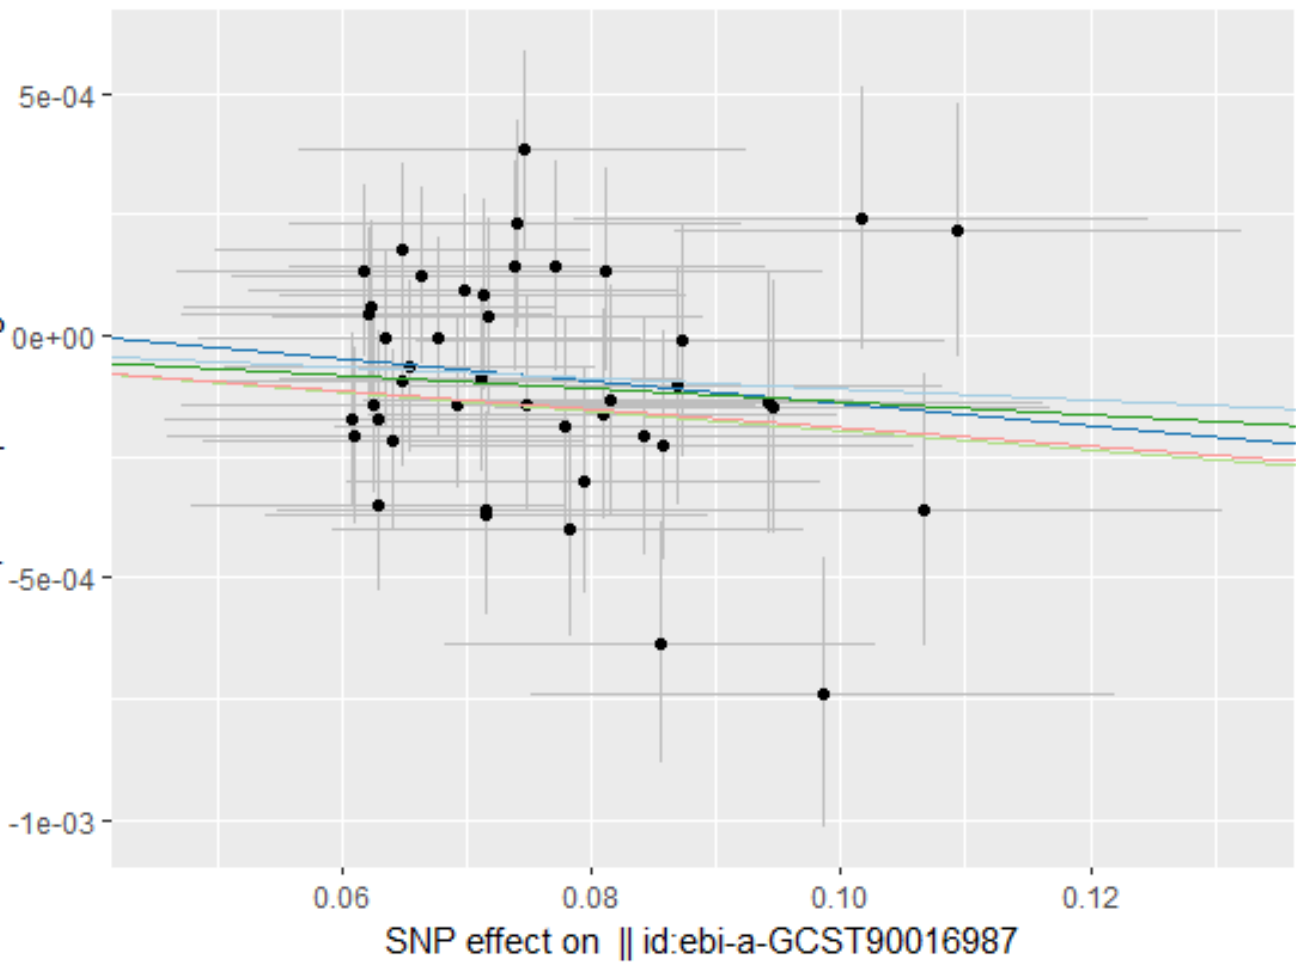

**Figure 44** Leave-one-out analysis, funnel plot, MR effect size and scatter plot for gut microbiota abundance (genus *Eubacterium ventriosum* group id.11341) on gastric ulcer

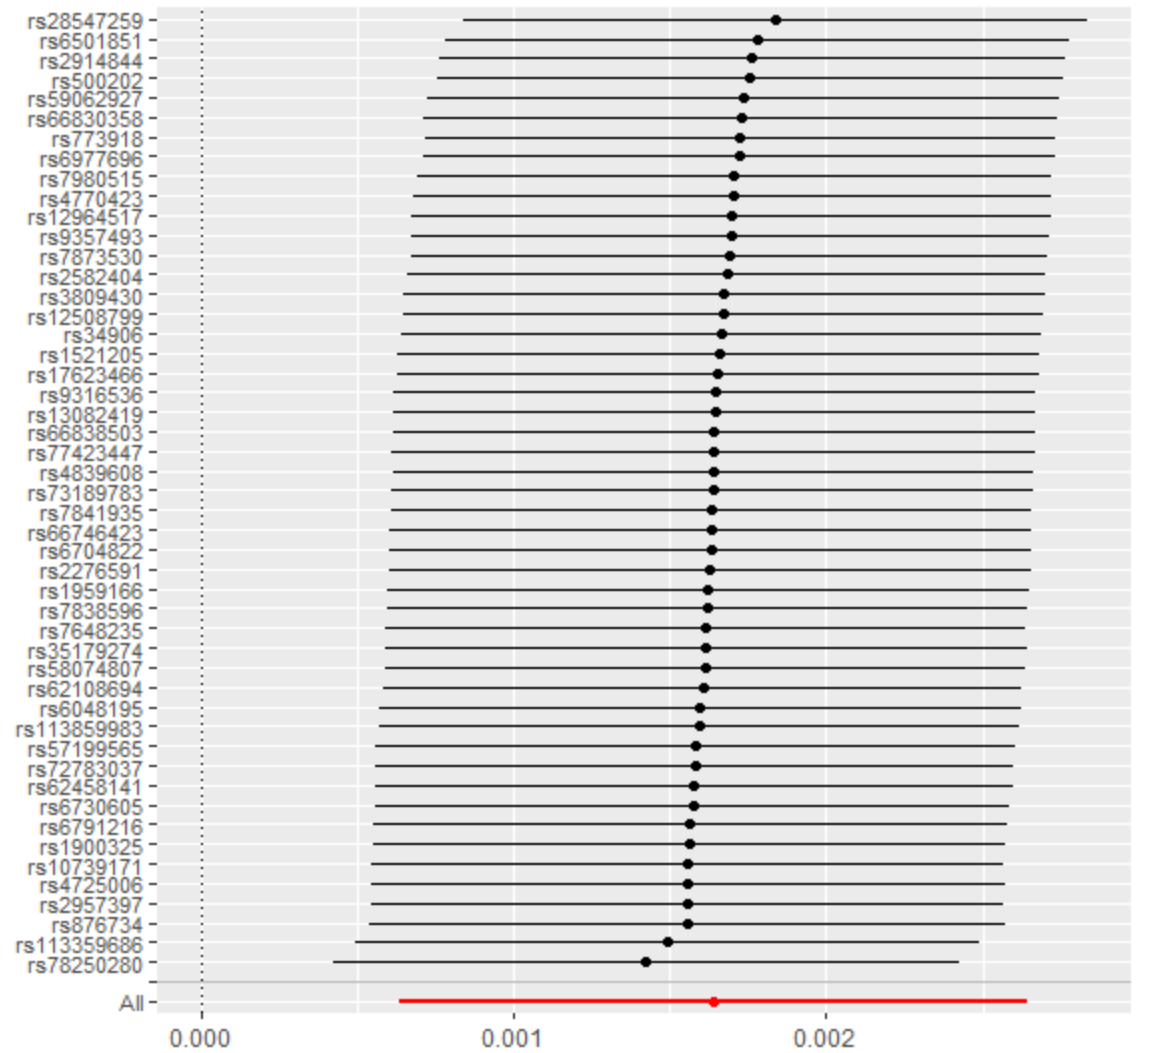

' || id:ebi-a-GCST90017005' on 'Non-cancer illness code, self-reported: gastric/stomach ulcers' || id:ukb-b-200

MR Method

- Inverse variance weighted
- MR Egger

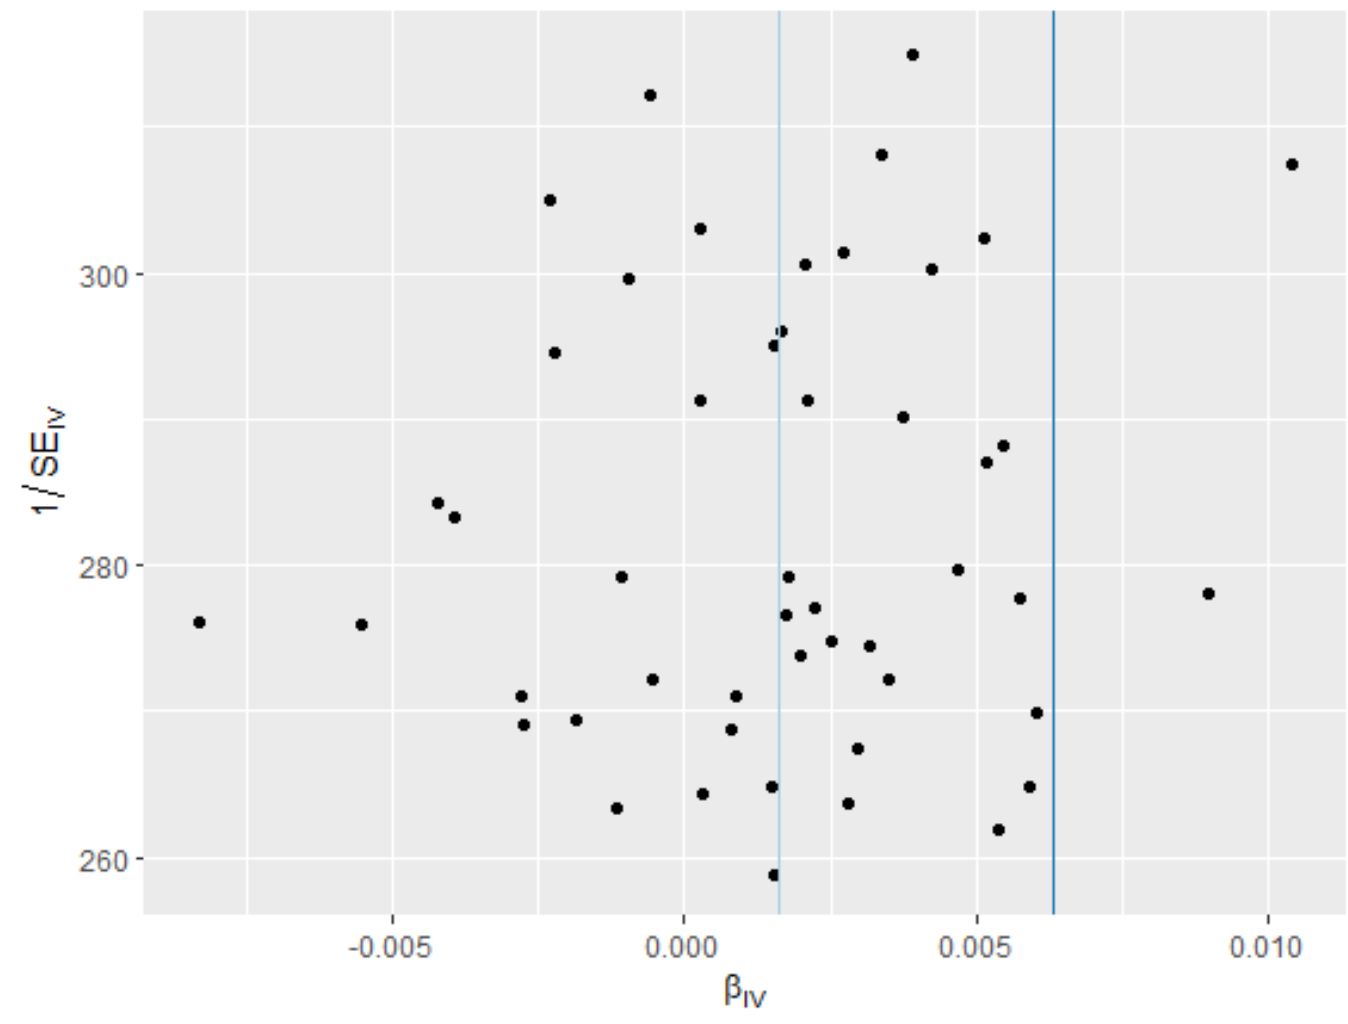

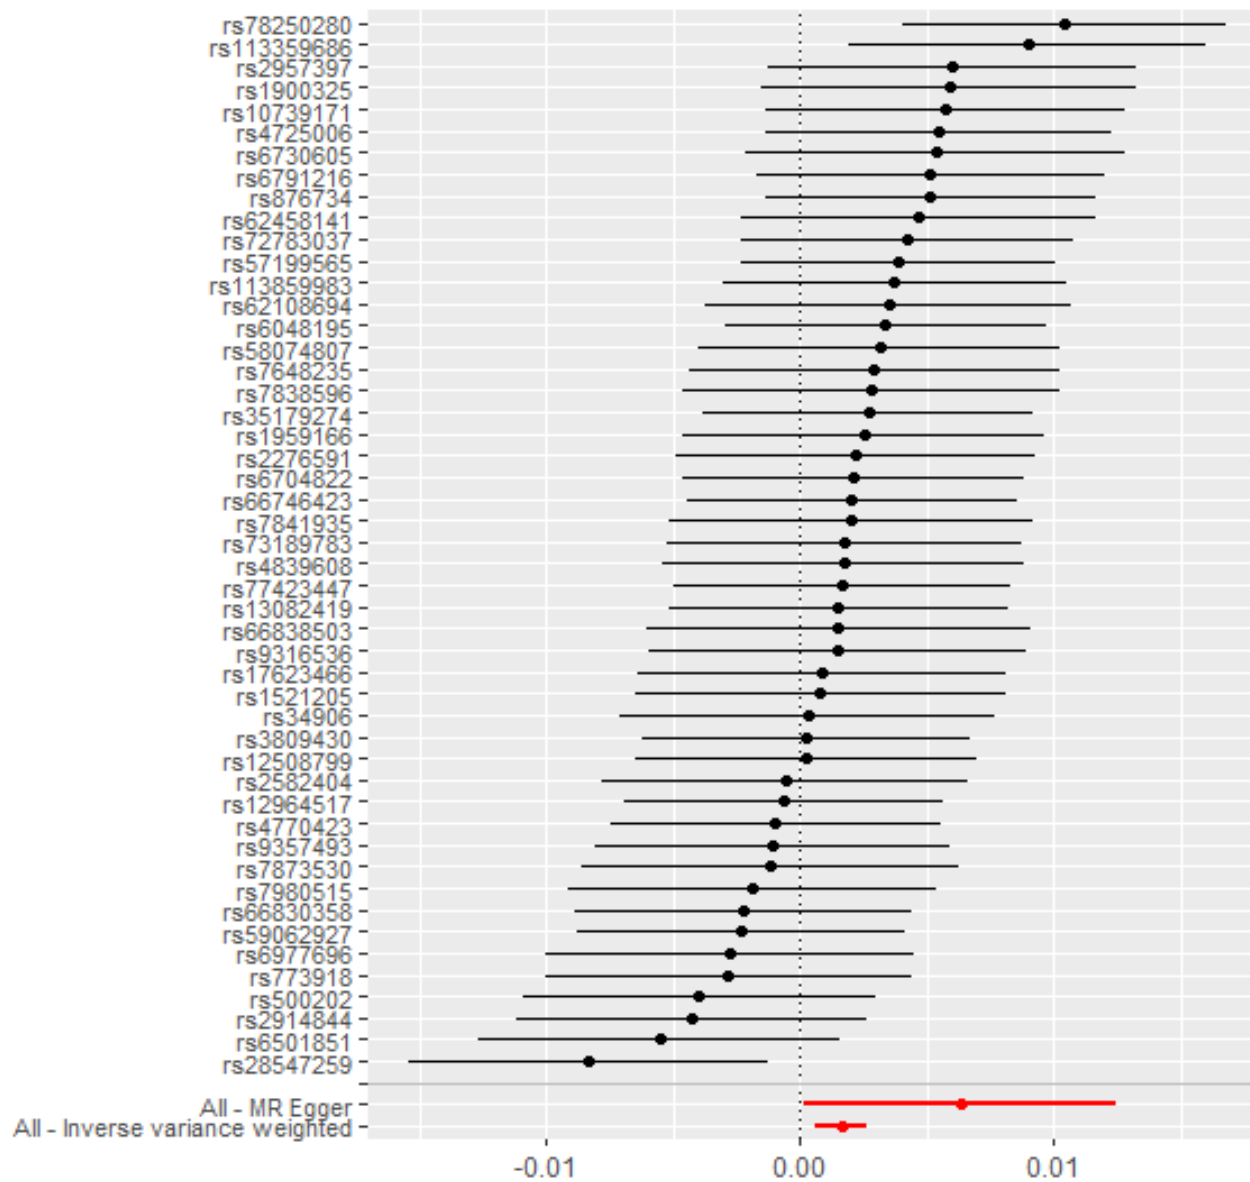

' || id:ebi-a-GCST90017005' on 'Non-cancer illness code, self-reported: gastric/stomach ulcers || id:u

t on Non-cancer illness code, self-reported: gastric/stomach ulcers || id:ukb-b-20078

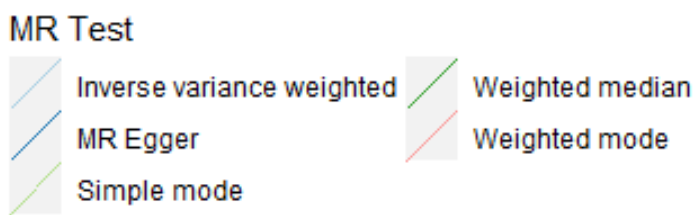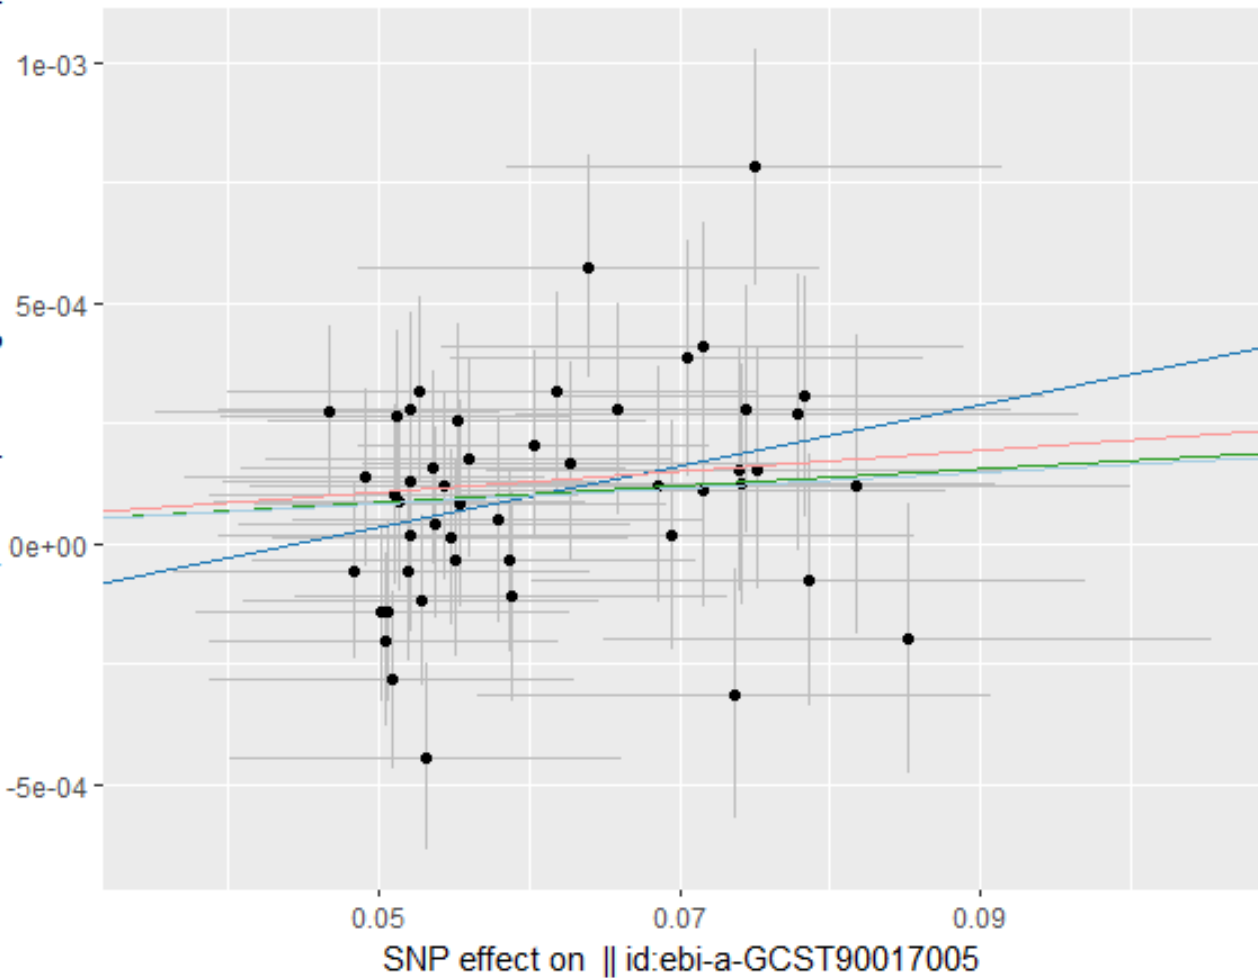



**Figure 45** Leave-one-out analysis, funnel plot, MR effect size and scatter plot for gut microbiota abundance (genus Ruminiclostridium9 id.11357) on gastric ulcer

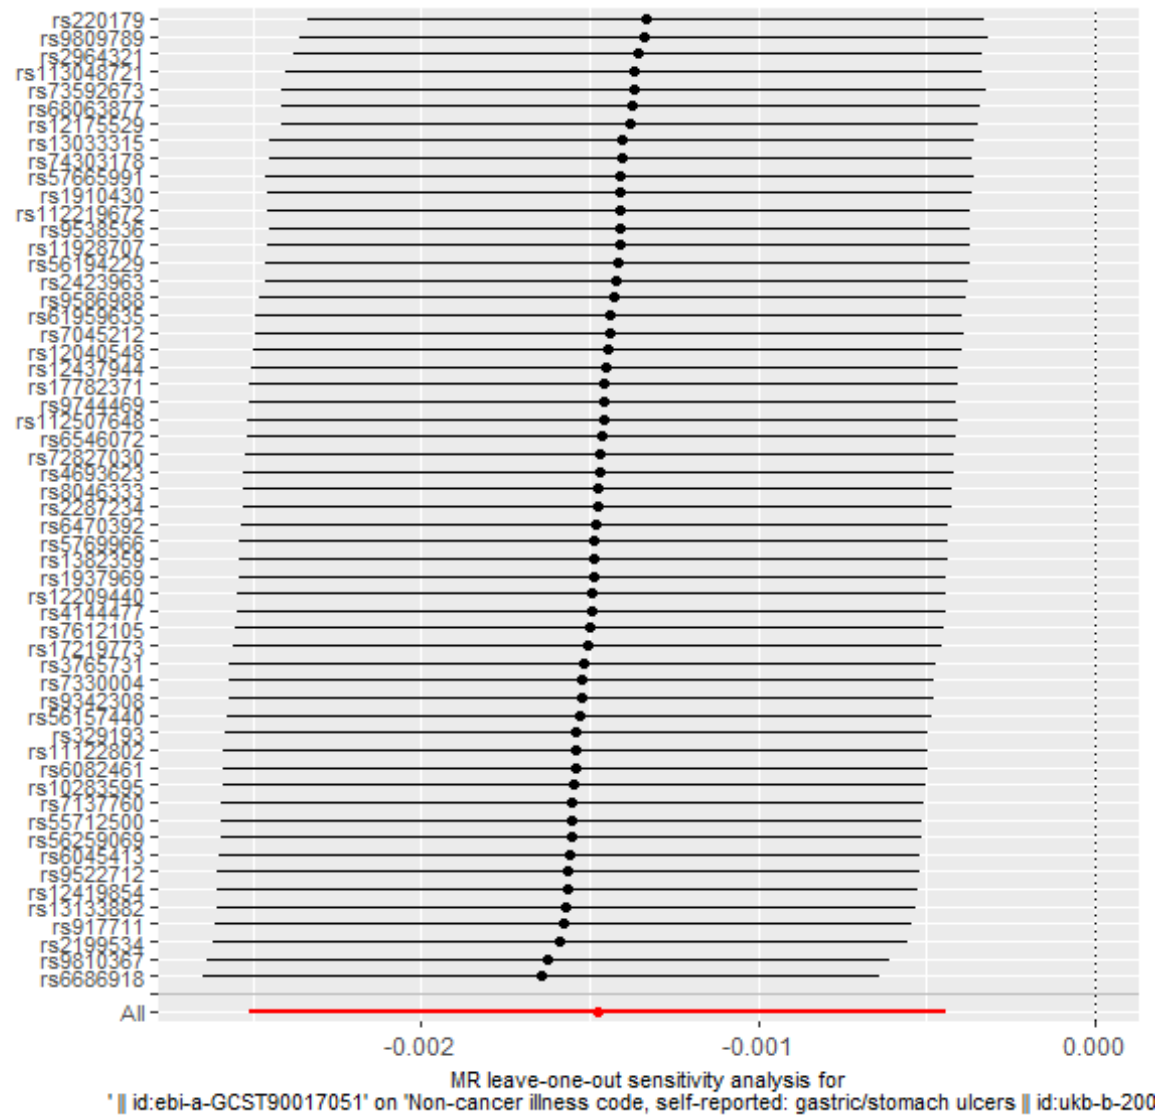

MR Method

- Inverse variance weighted
- MR Egger

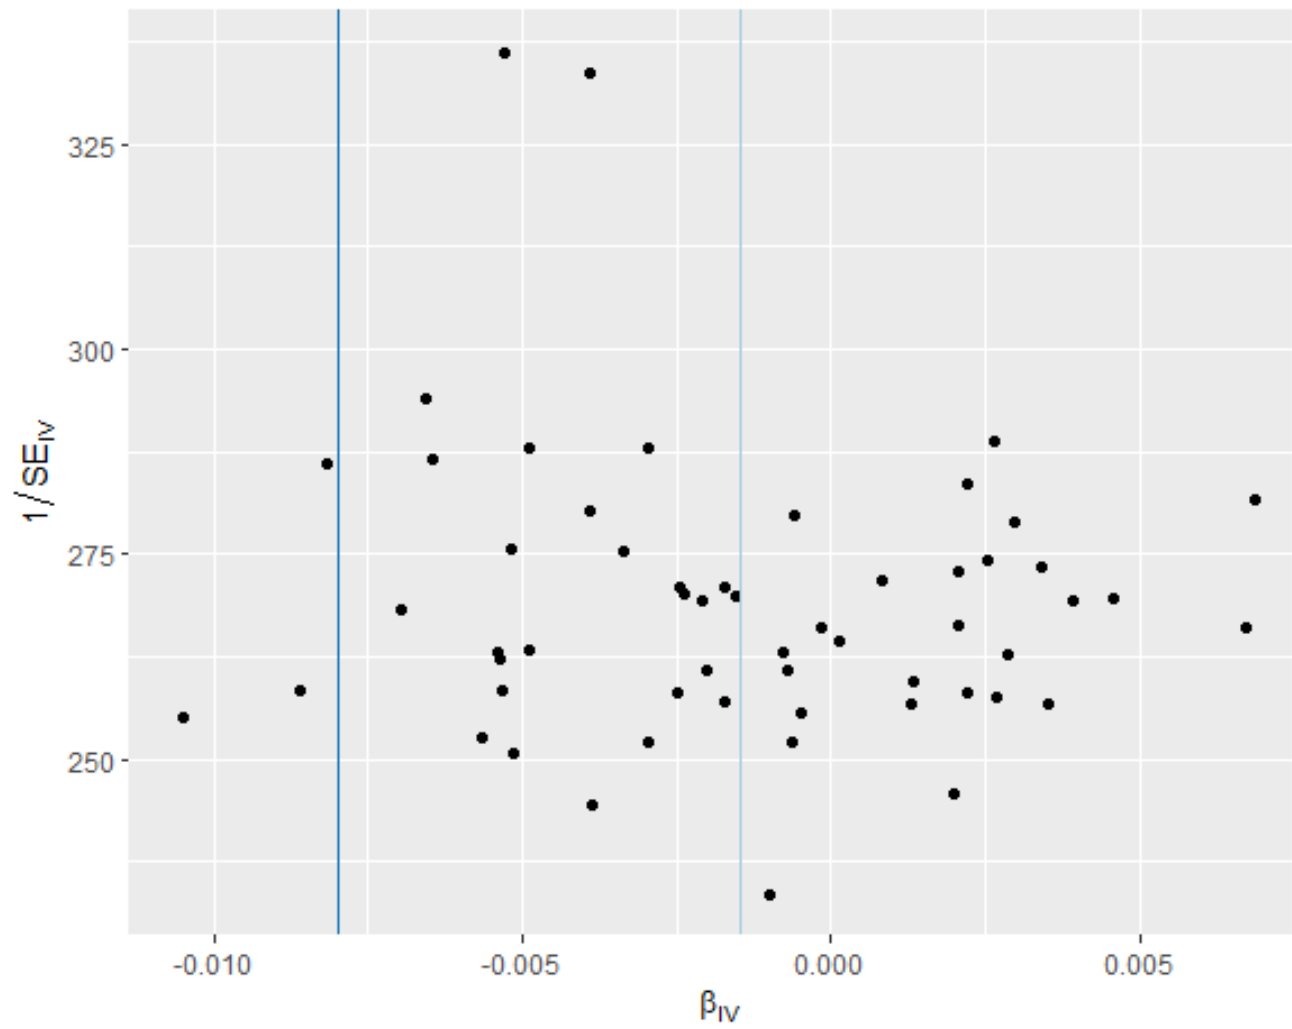

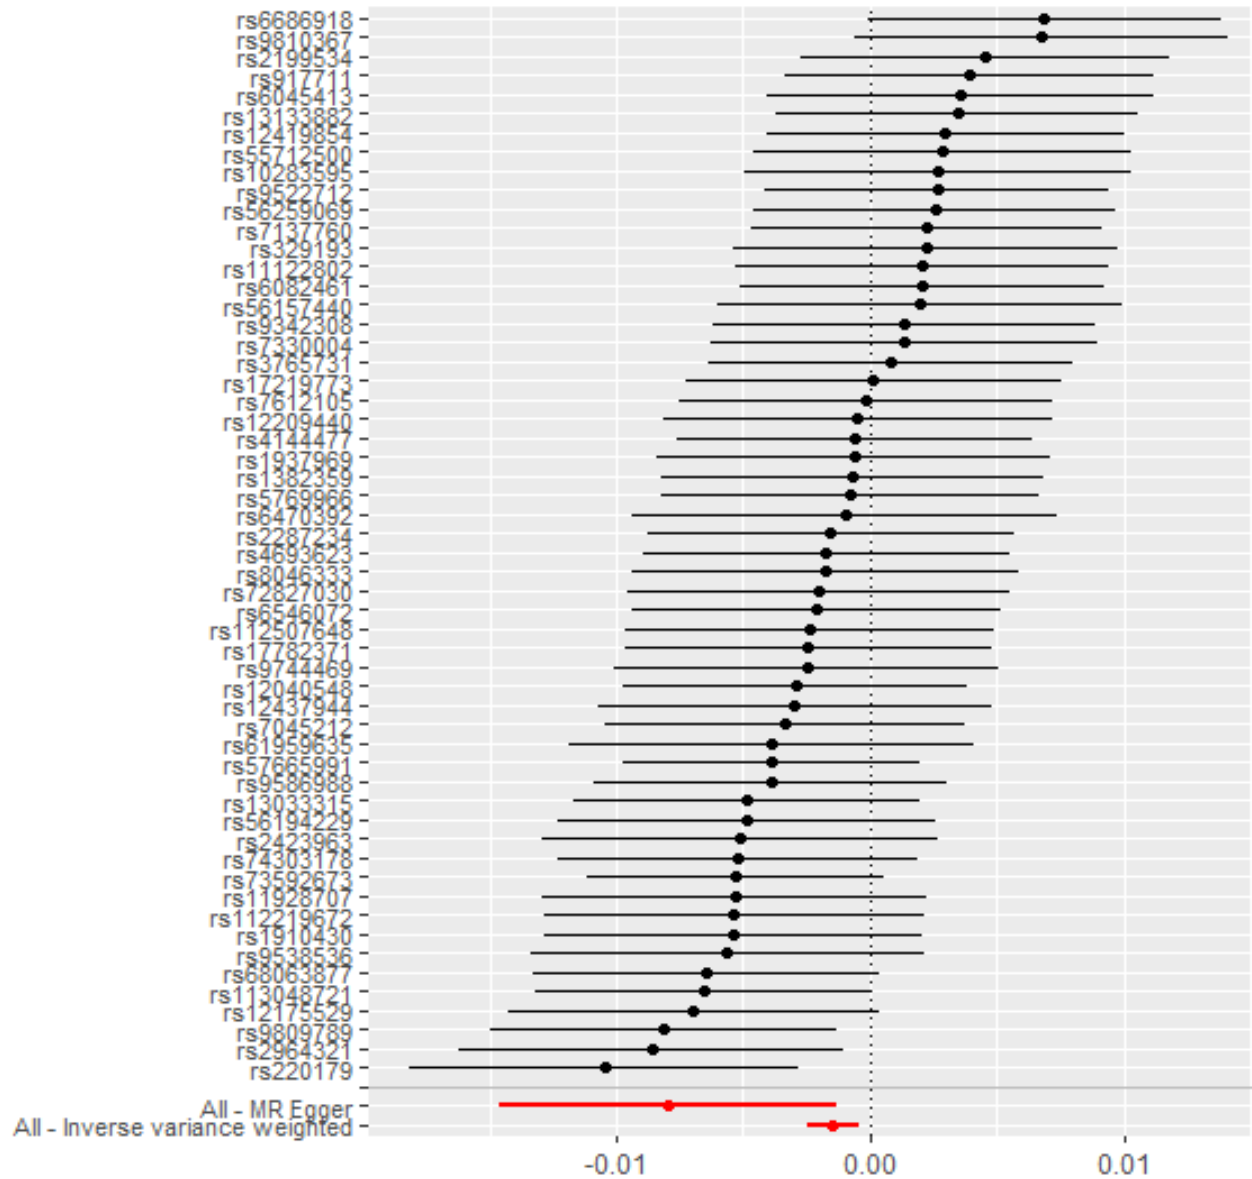

t on Non-cancer illness code, self-reported: gastric/stomach ulcers || id:ukb-b-20078

MR Test

- Inverse variance weighted
- MR Egger
- Simple mode
- Weighted median
- Weighted mode

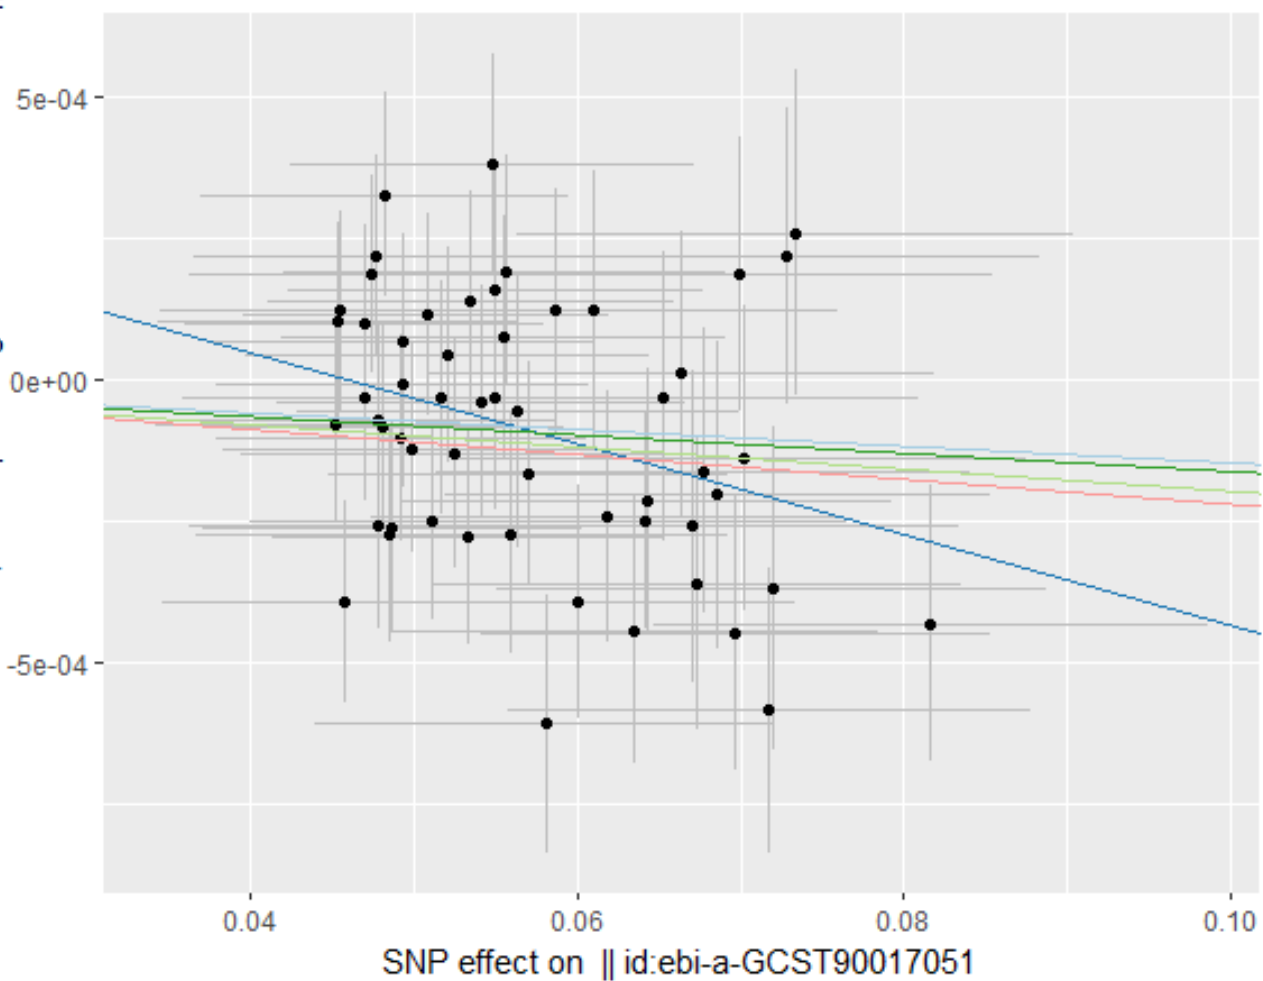

**Figure 46** Leave-one-out analysis, funnel plot, MR effect size and scatter plot for gut microbiota abundance (genus Ruminococcaceae NK4A214 group id.11358) on gastric ulcer

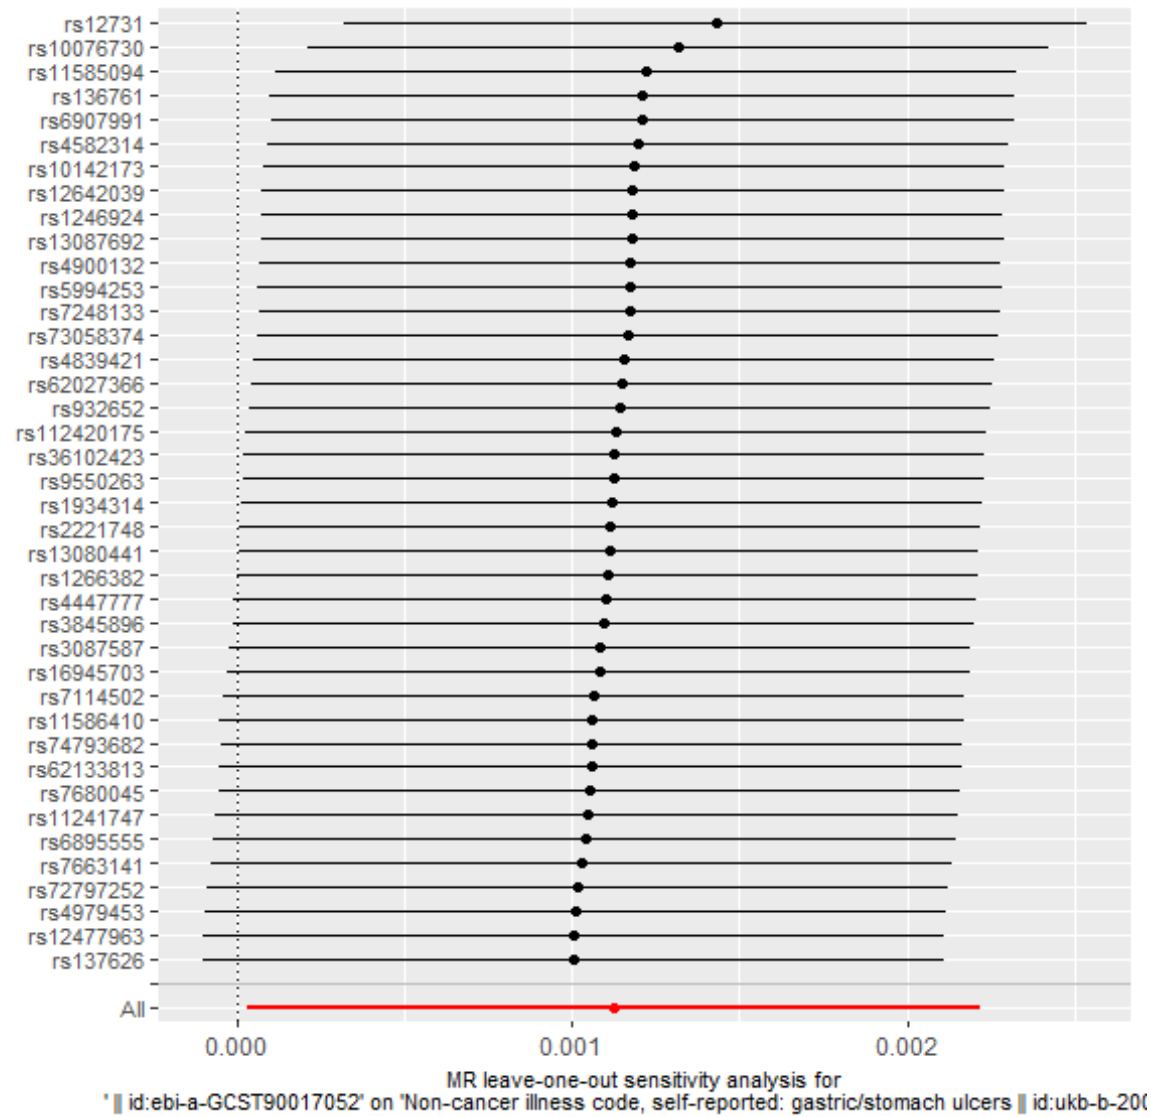

MR Method

- Inverse variance weighted
- MR Egger

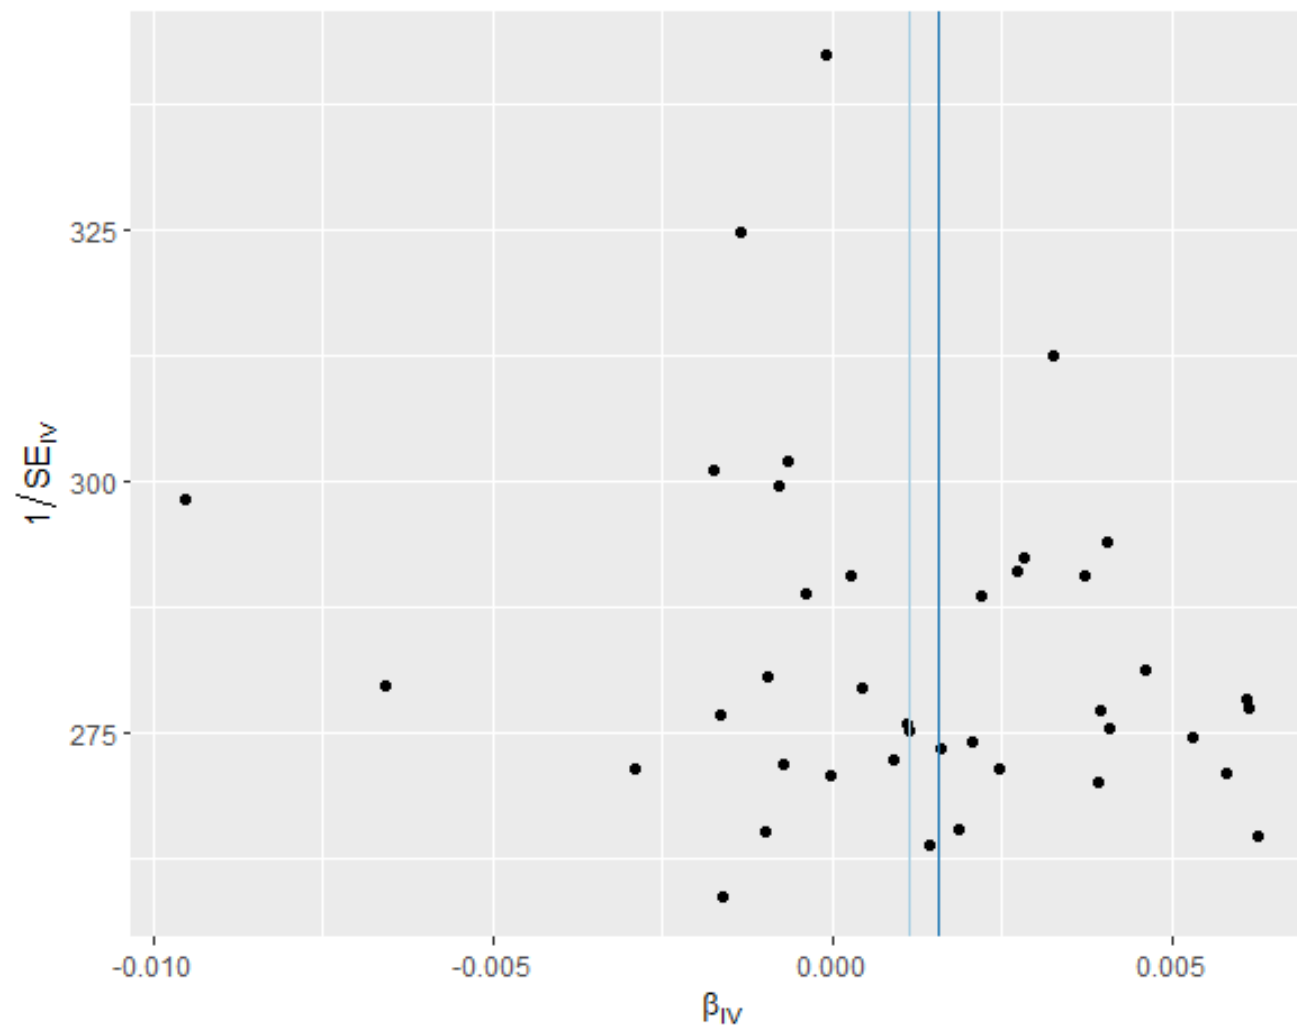

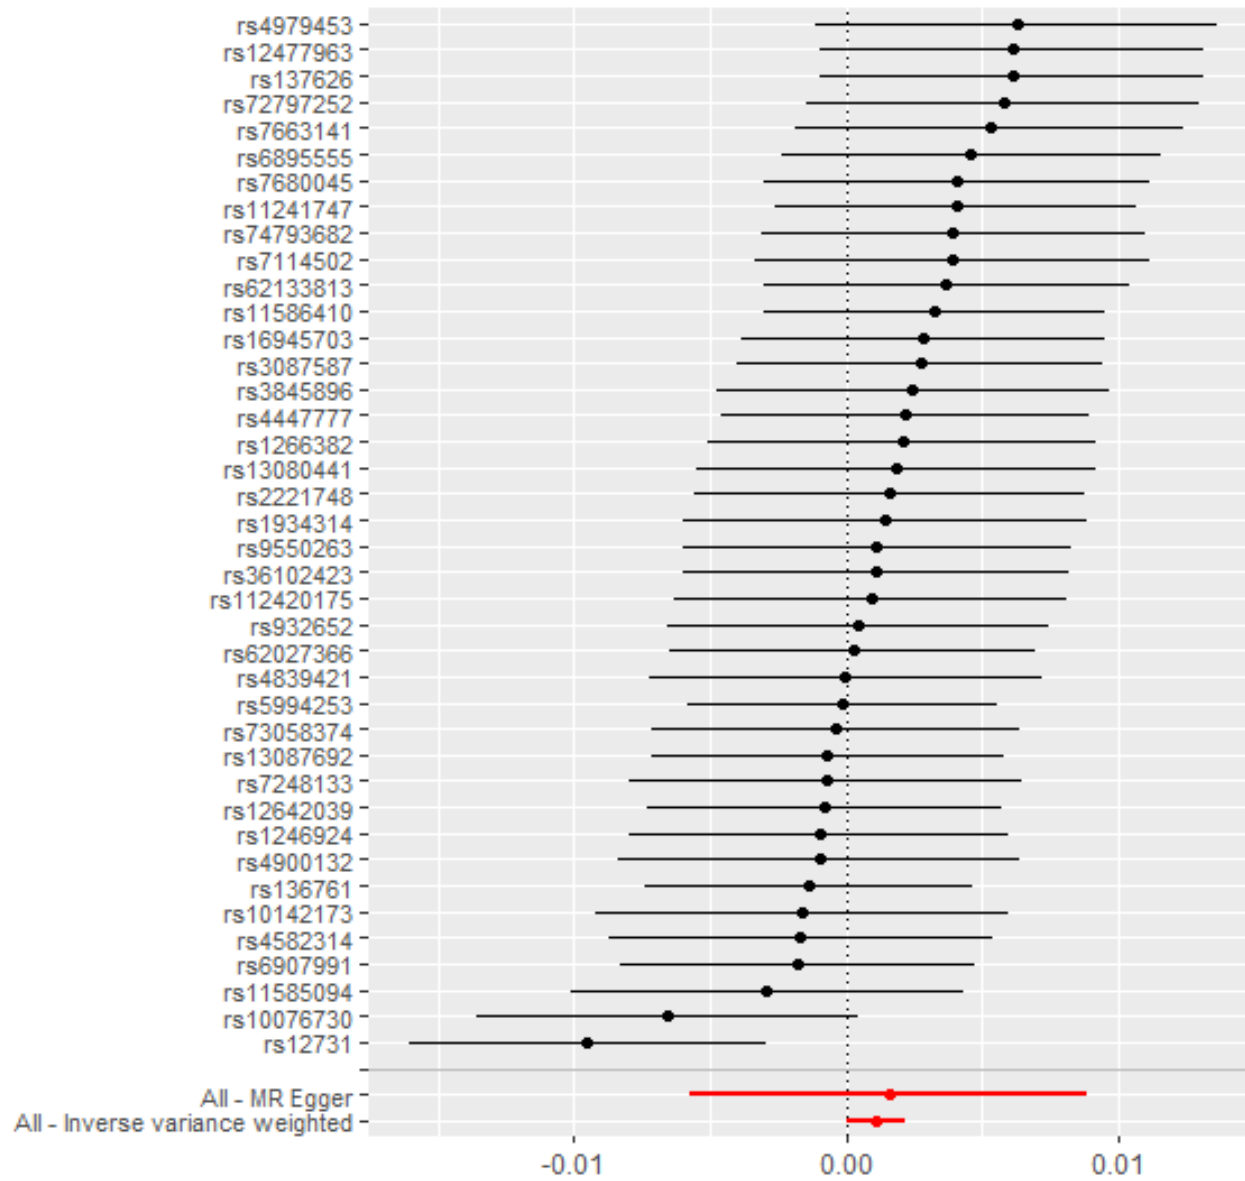

' || id:ebi-a-GCST90017052' on 'Non-cancer illness code, self-reported: gastric/stomach ulcers || id:1

t on Non-cancer illness code, self-reported: gastric/stomach ulcers || id:ukb-b-20078

MR Test

- Inverse variance weighted
- MR Egger
- Simple mode
- Weighted median
- Weighted mode

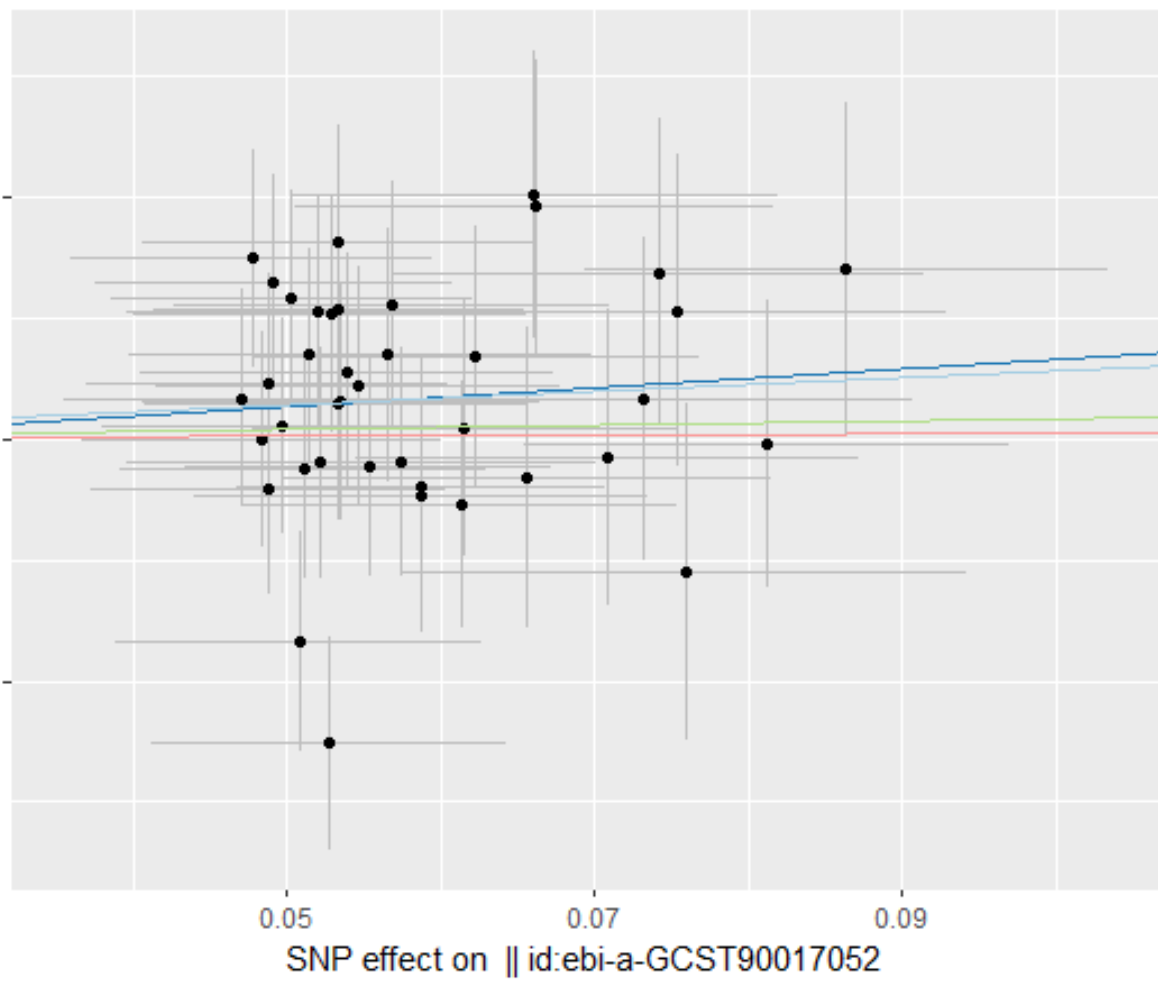



**Figure 47** Leave-one-out analysis, funnel plot, MR effect size and scatter plot for gut microbiota abundance (genus *Ruminococcus gauvreauii* group id.11342) on gastric ulcer

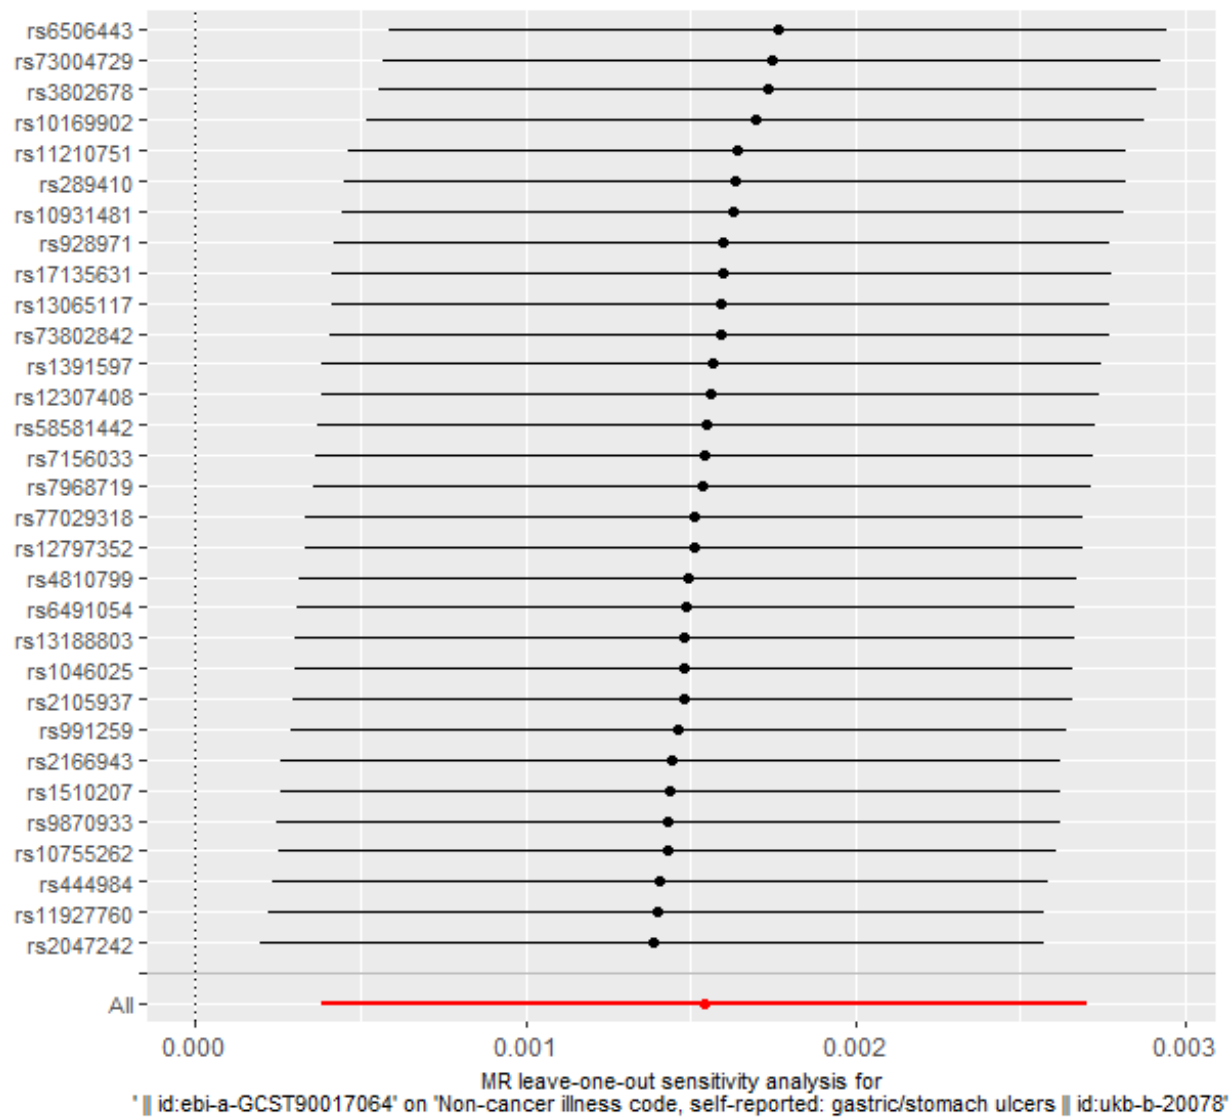

MR Method

- Inverse variance weighted
- MR Egger

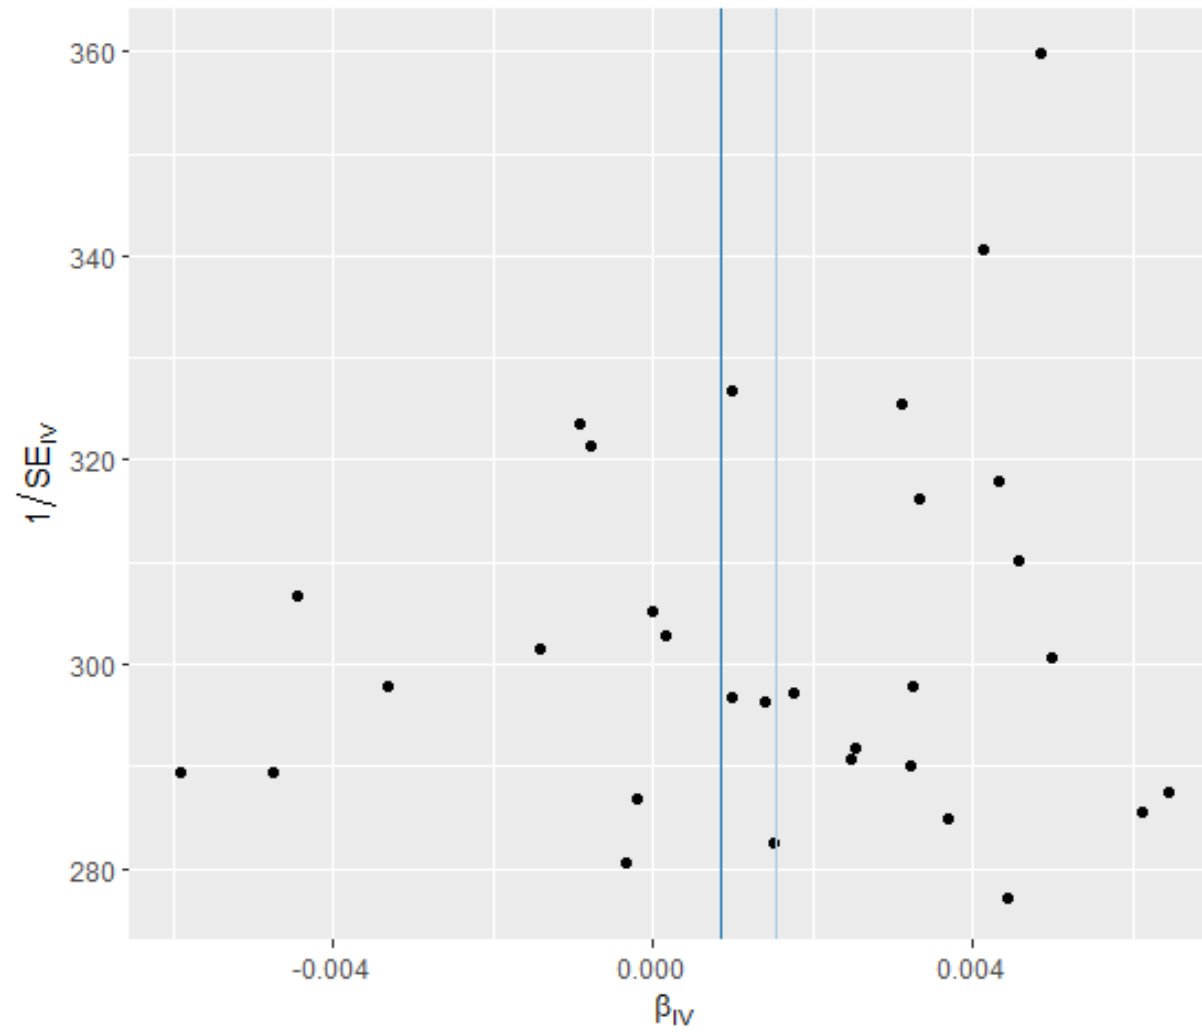

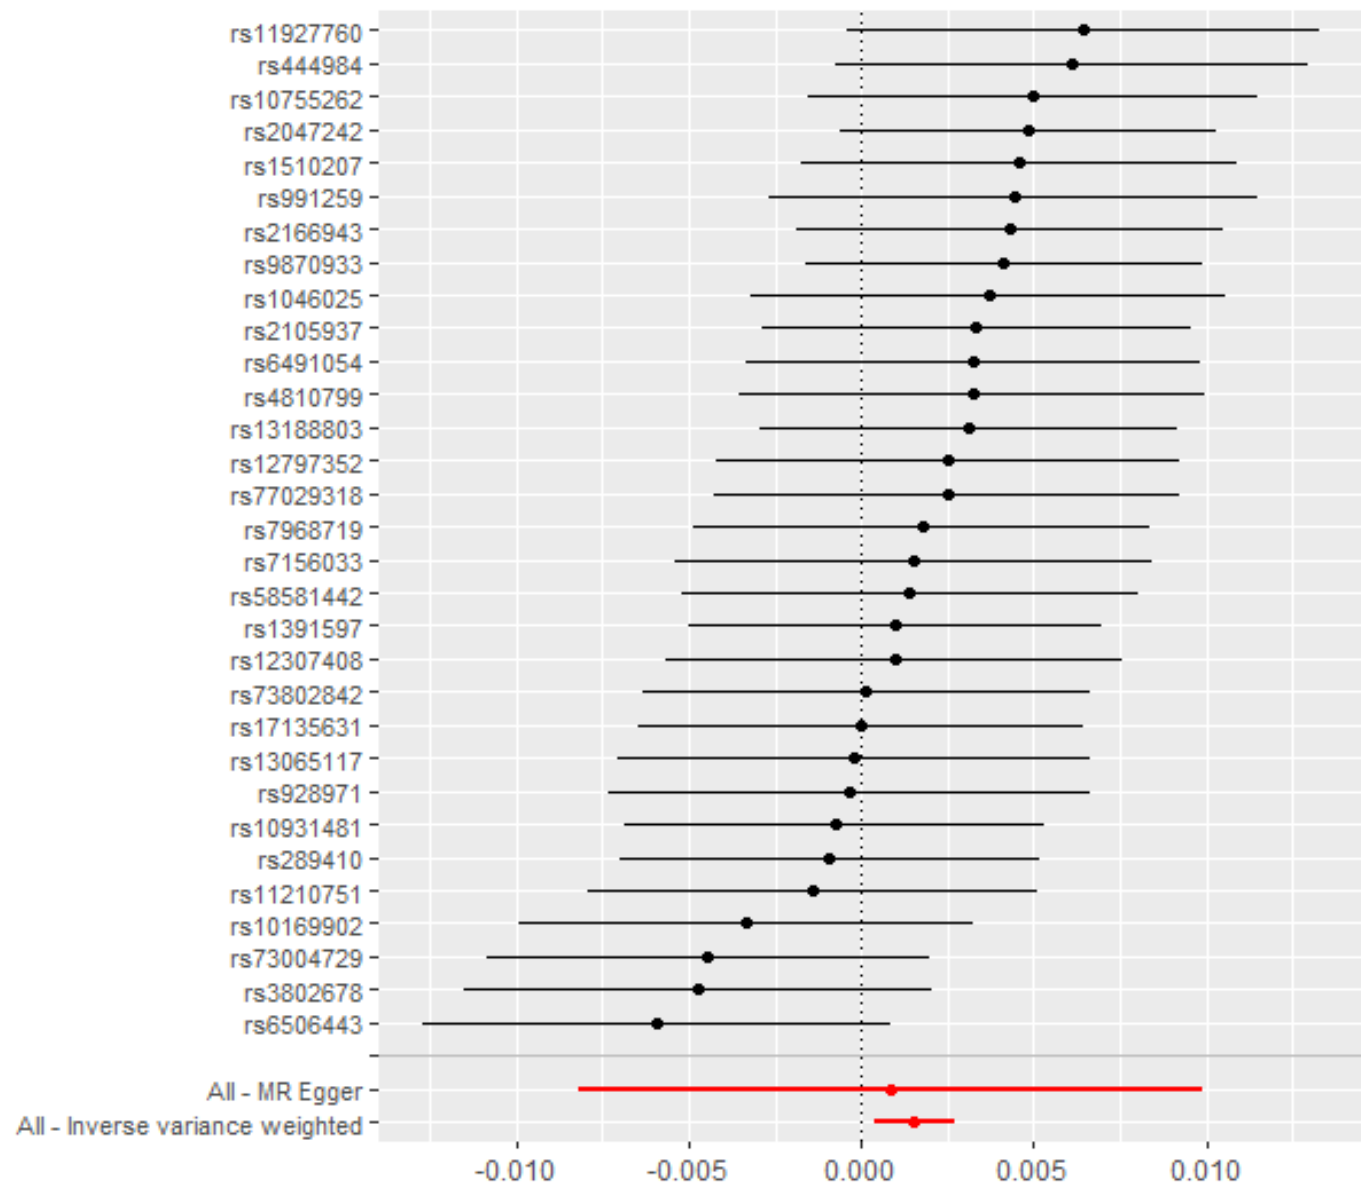

MR effect size for  
 ' || id:ebi-a-GCST90017064' on 'Non-cancer illness code, self-reported: gastric/stomach ulcers' || id:ukb-

on Non-cancer illness code, self-reported: gastric/stomach ulcers || id:ukb-b-20078

### MR Test

- Inverse variance weighted
- MR Egger
- Simple mode
- Weighted median
- Weighted mode

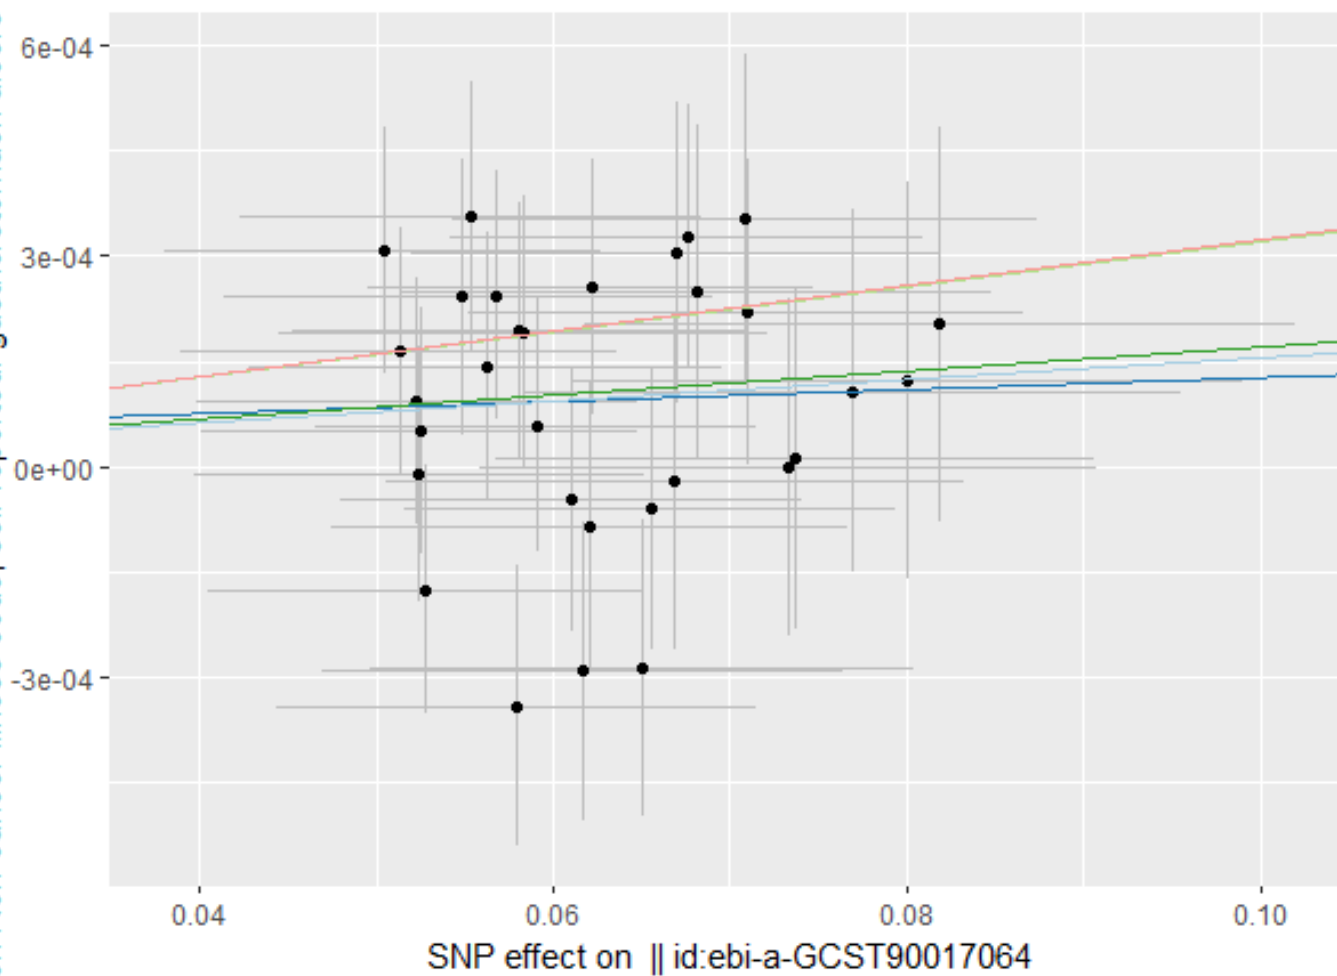

**Figure 48** Leave-one-out analysis, funnel plot, MR effect size and scatter plot for gut microbiota abundance (genus *Ruminococcus gnavus* group id.14376) on gastric ulcer

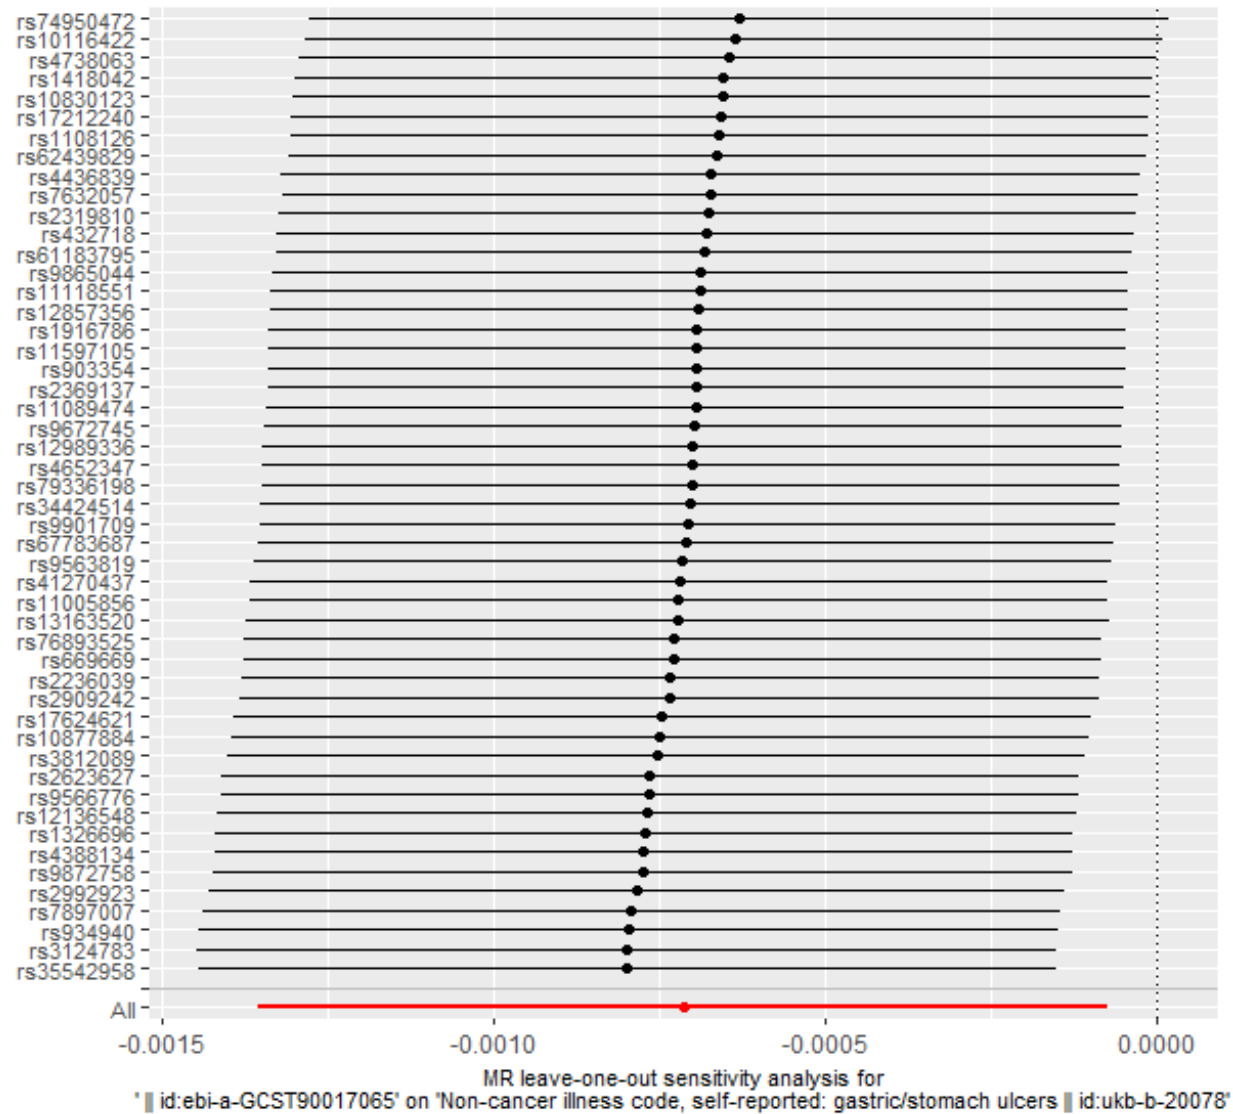

MR Method

- Inverse variance weighted
- MR Egger

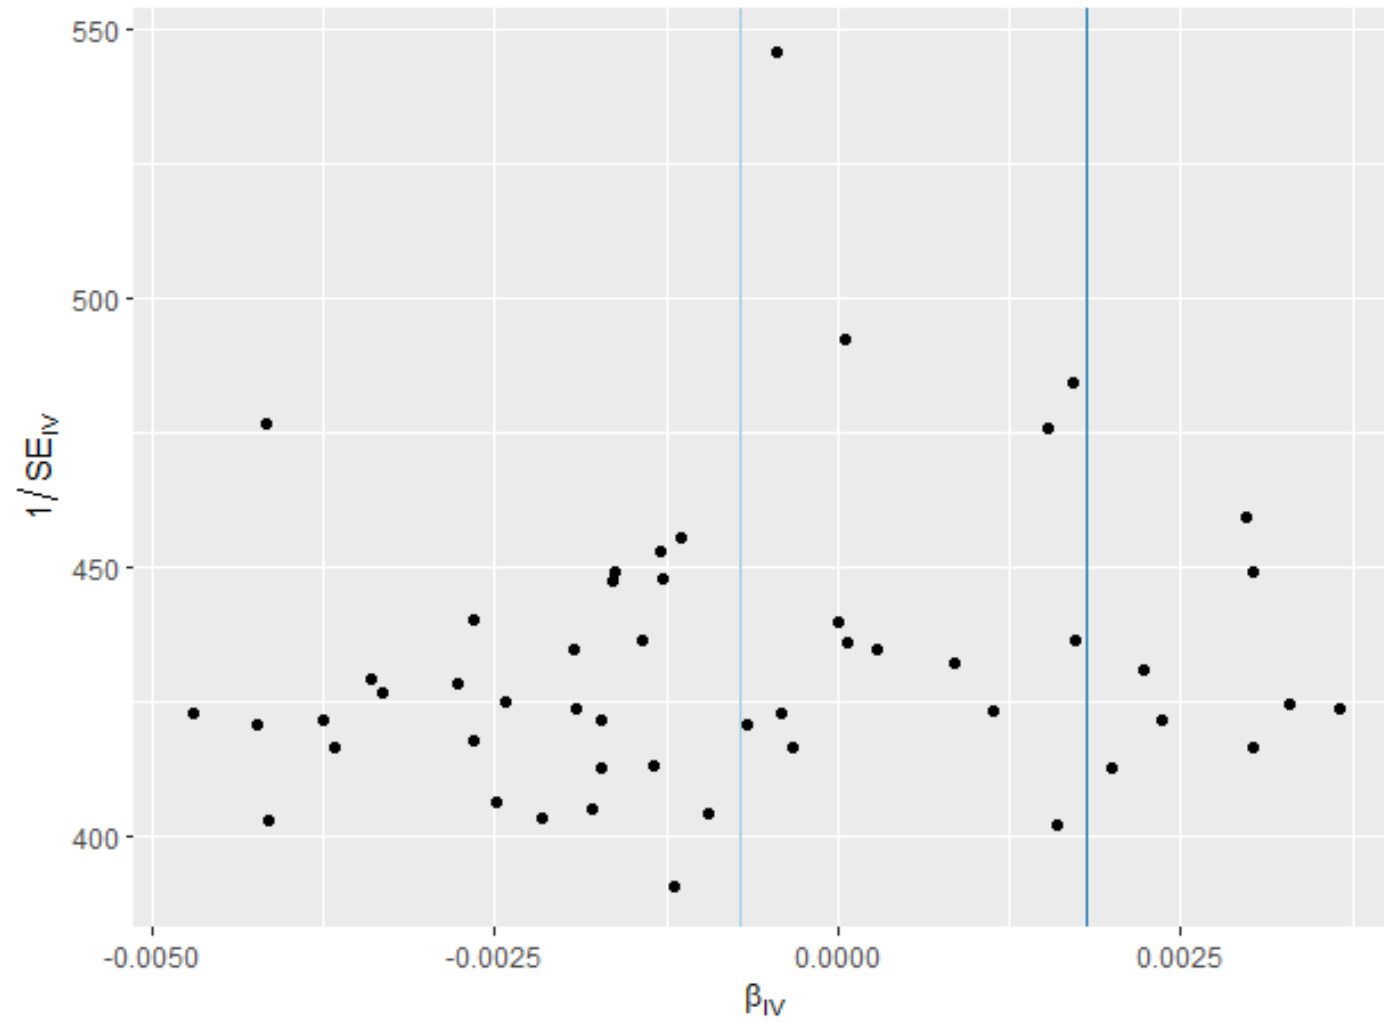

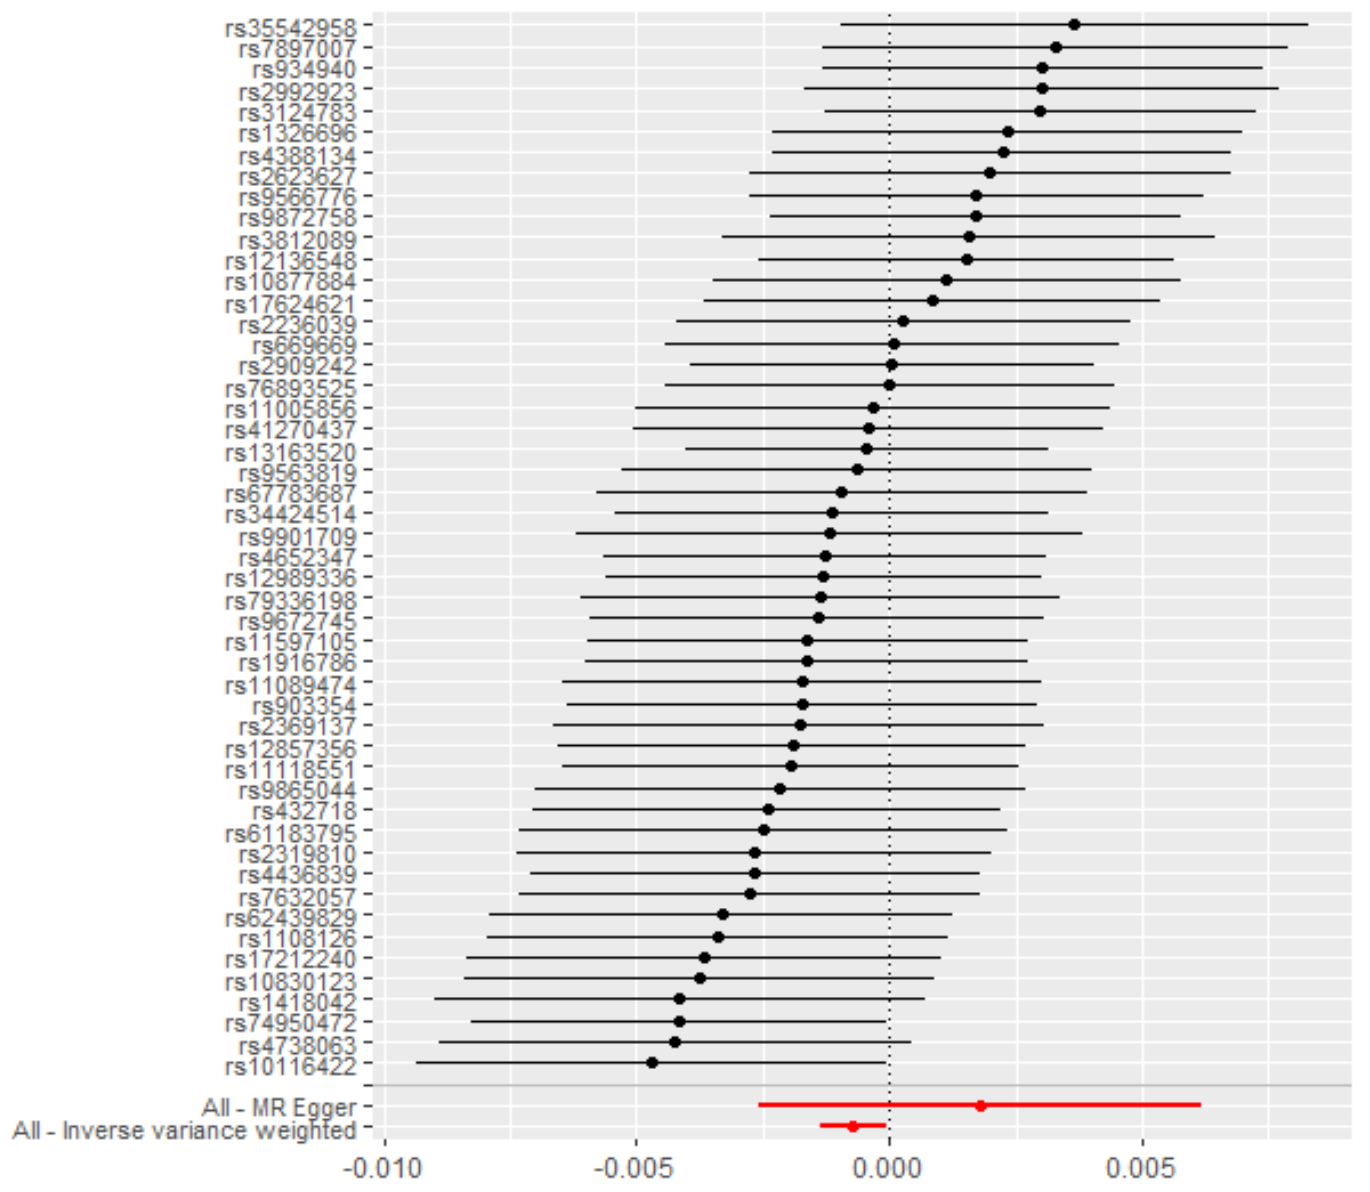

MR effect size for  
' || id:ebi-a-GCST90017065' on 'Non-cancer illness code, self-reported: gastric/stomach ulcers || id:ukb-

on Non-cancer illness code, self-reported: gastric/stomach ulcers || id:ukb-b-20078

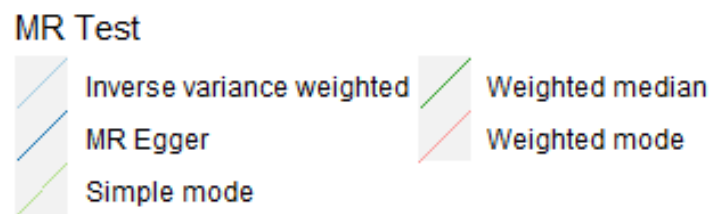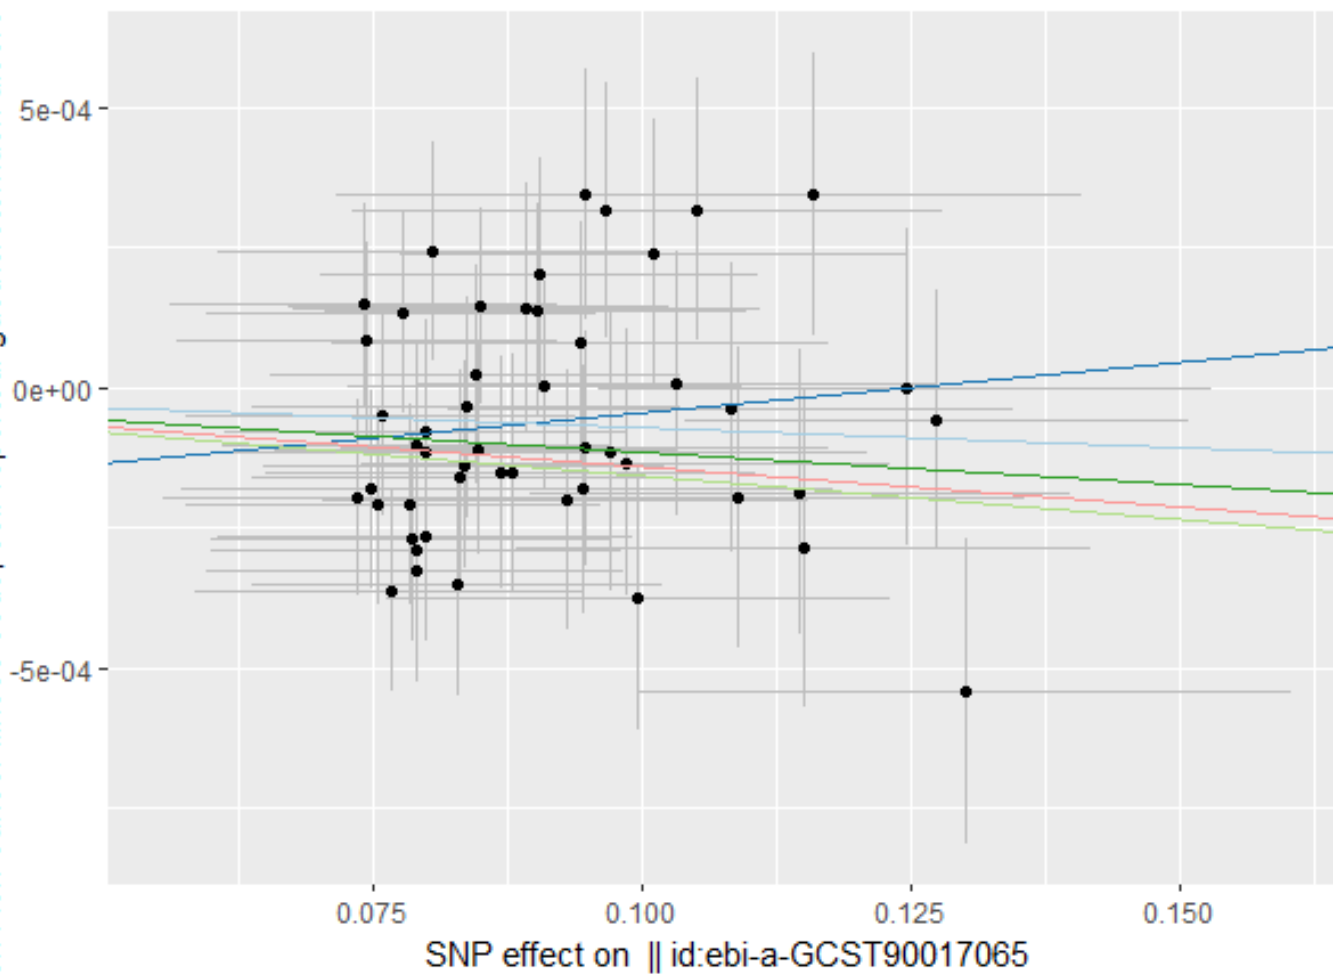



**Figure 49** Leave-one-out analysis, funnel plot, MR effect size and scatter plot for gut microbiota abundance (genus *Sutterella* id.2896) on gastric ulcer

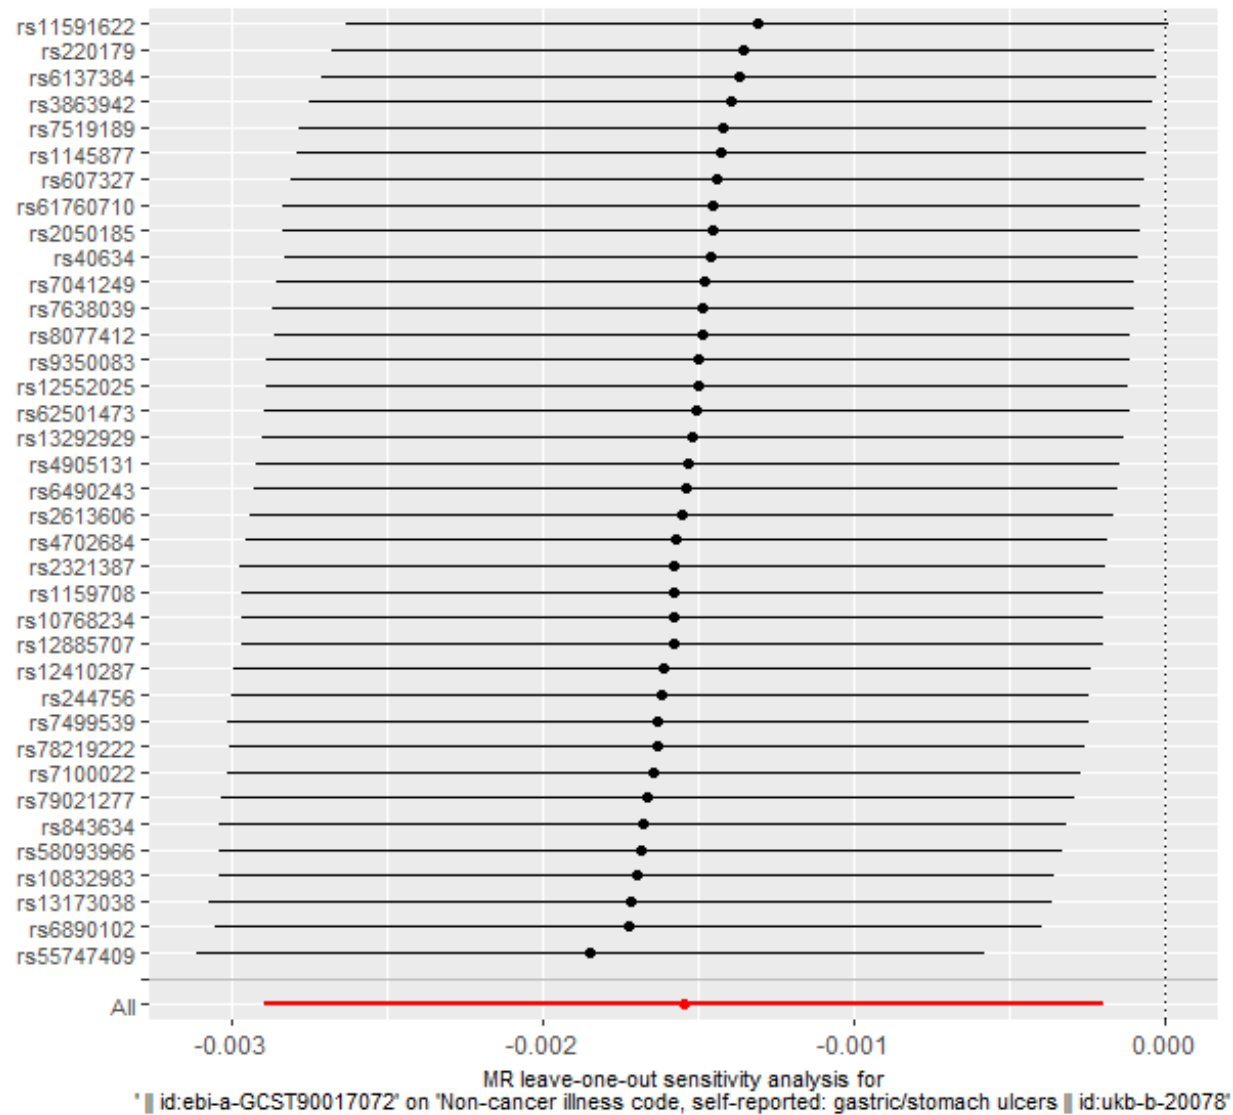

MR Method

- Inverse variance weighted
- MR Egger

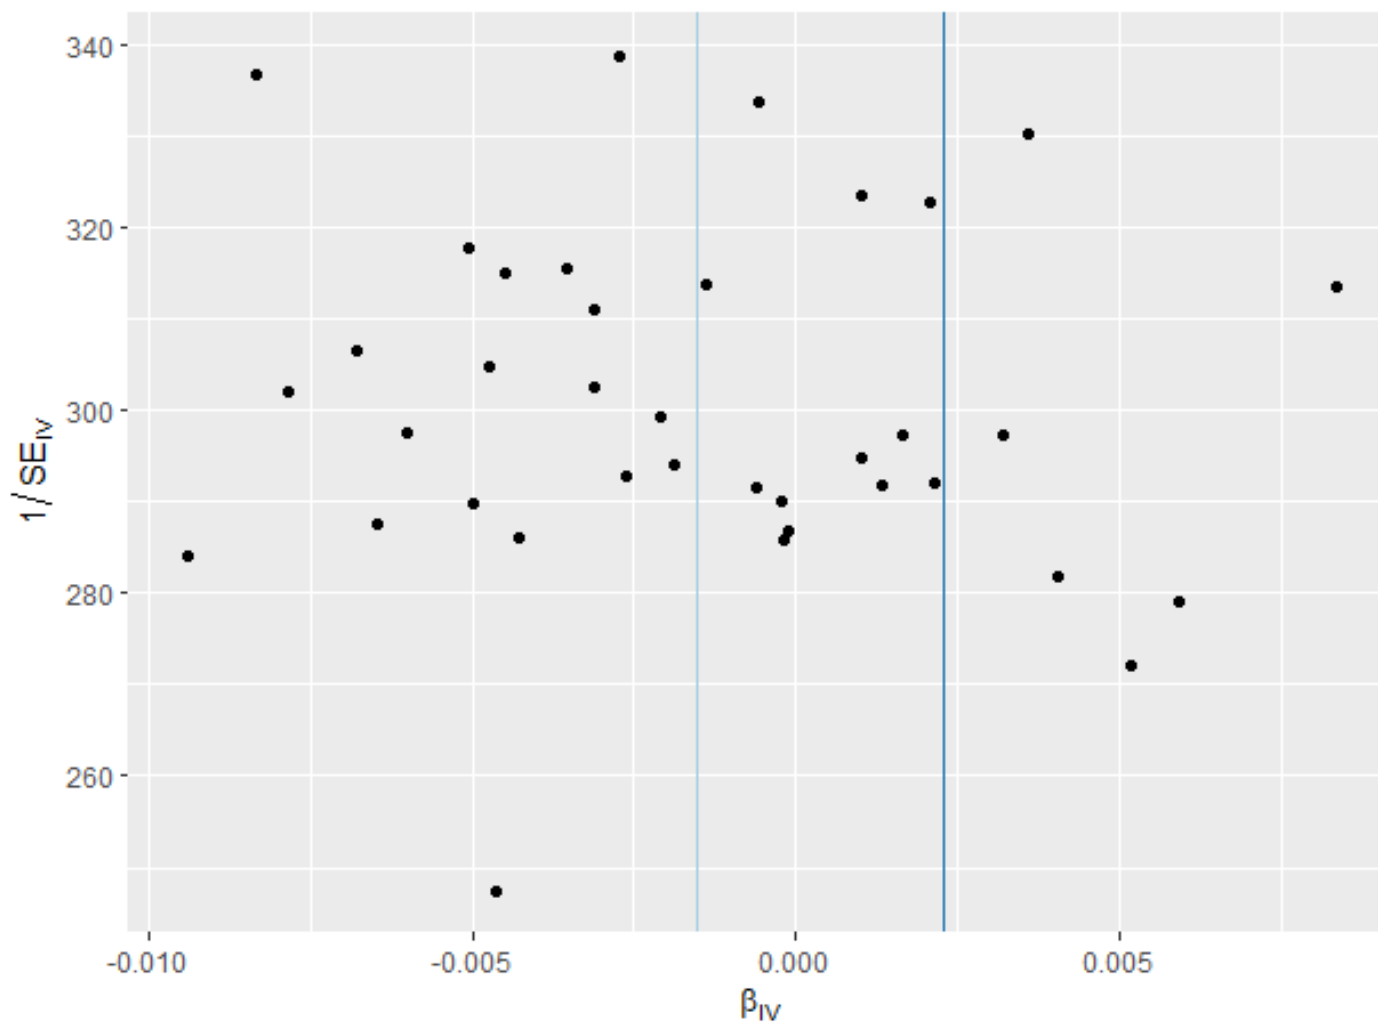

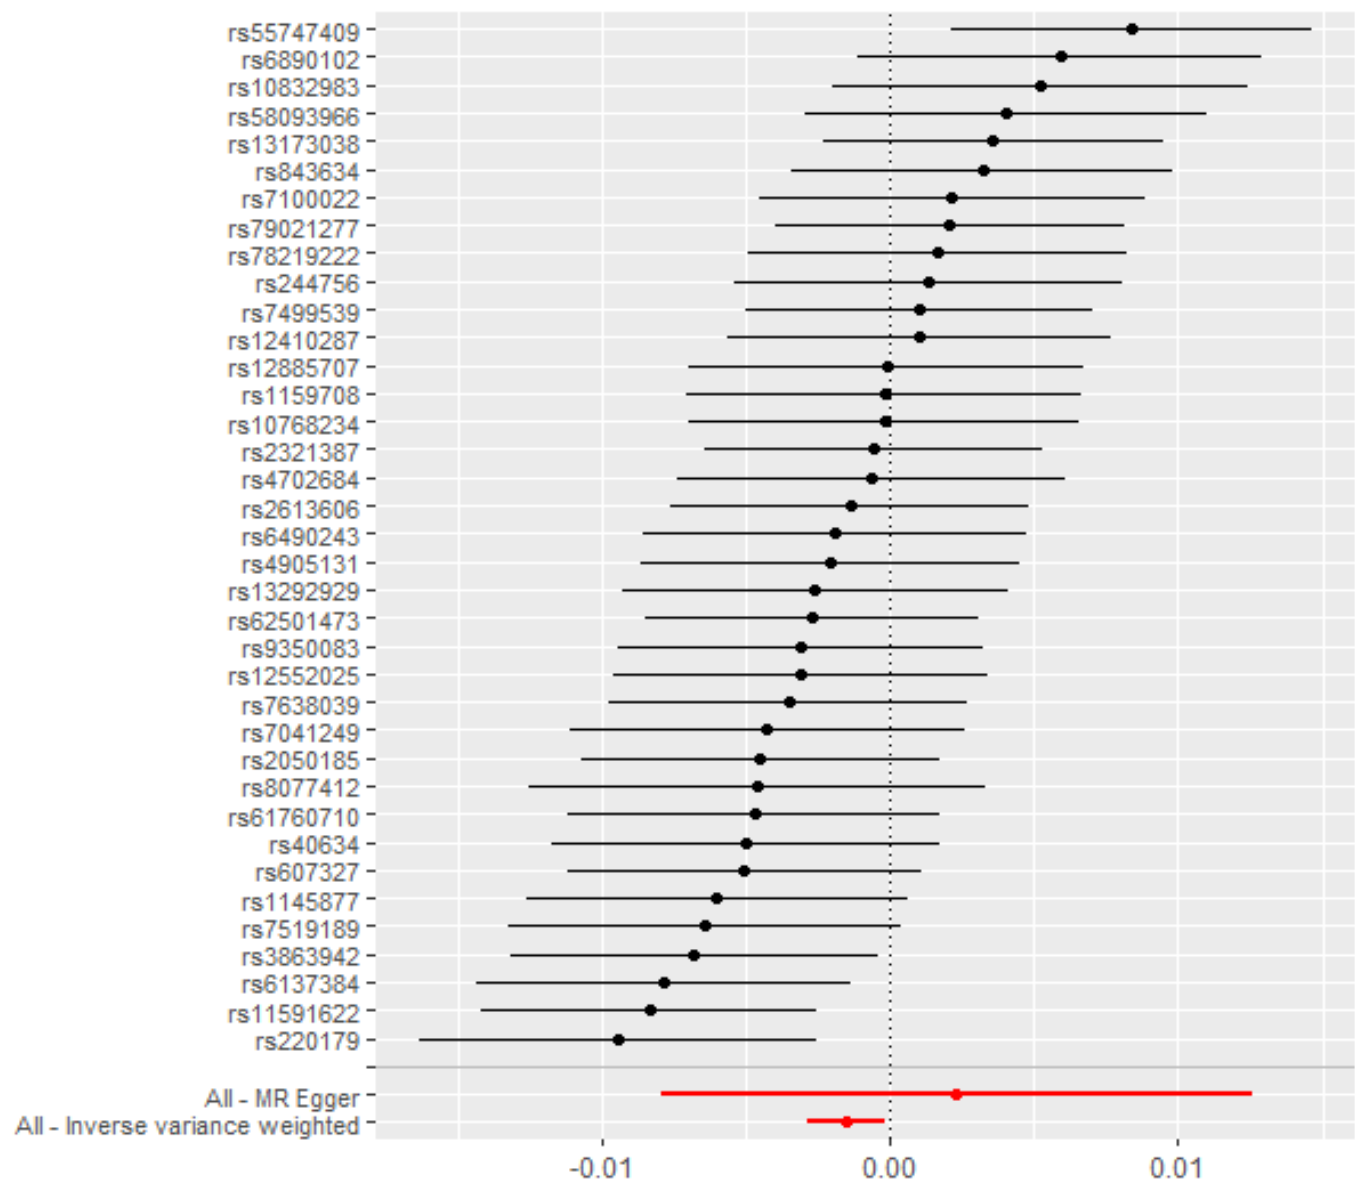

' || id:ebi-a-GCST90017072' on 'Non-cancer illness code, self-reported: gastric/stomach ulcers' || id:ukb-

on Non-cancer illness code, self-reported: gastric/stomach ulcers || id:ukb-b-20078

### MR Test

- Inverse variance weighted
- MR Egger
- Simple mode
- Weighted median
- Weighted mode

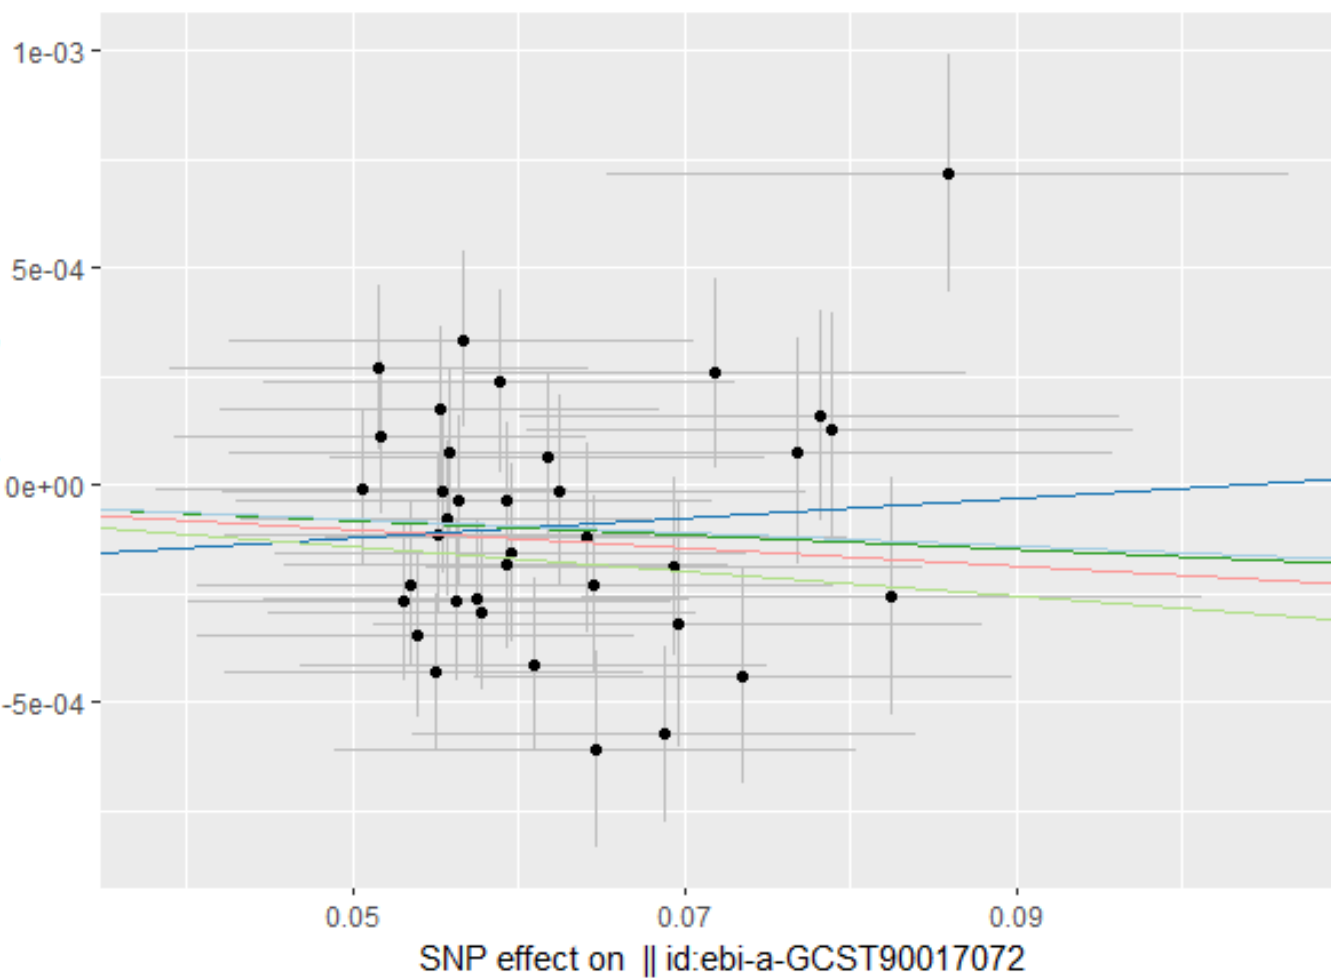

**Figure 50** Leave-one-out analysis, funnel plot, MR effect size and scatter plot for gut microbiota abundance (order Bacteroidales id.913) on gastric ulcer

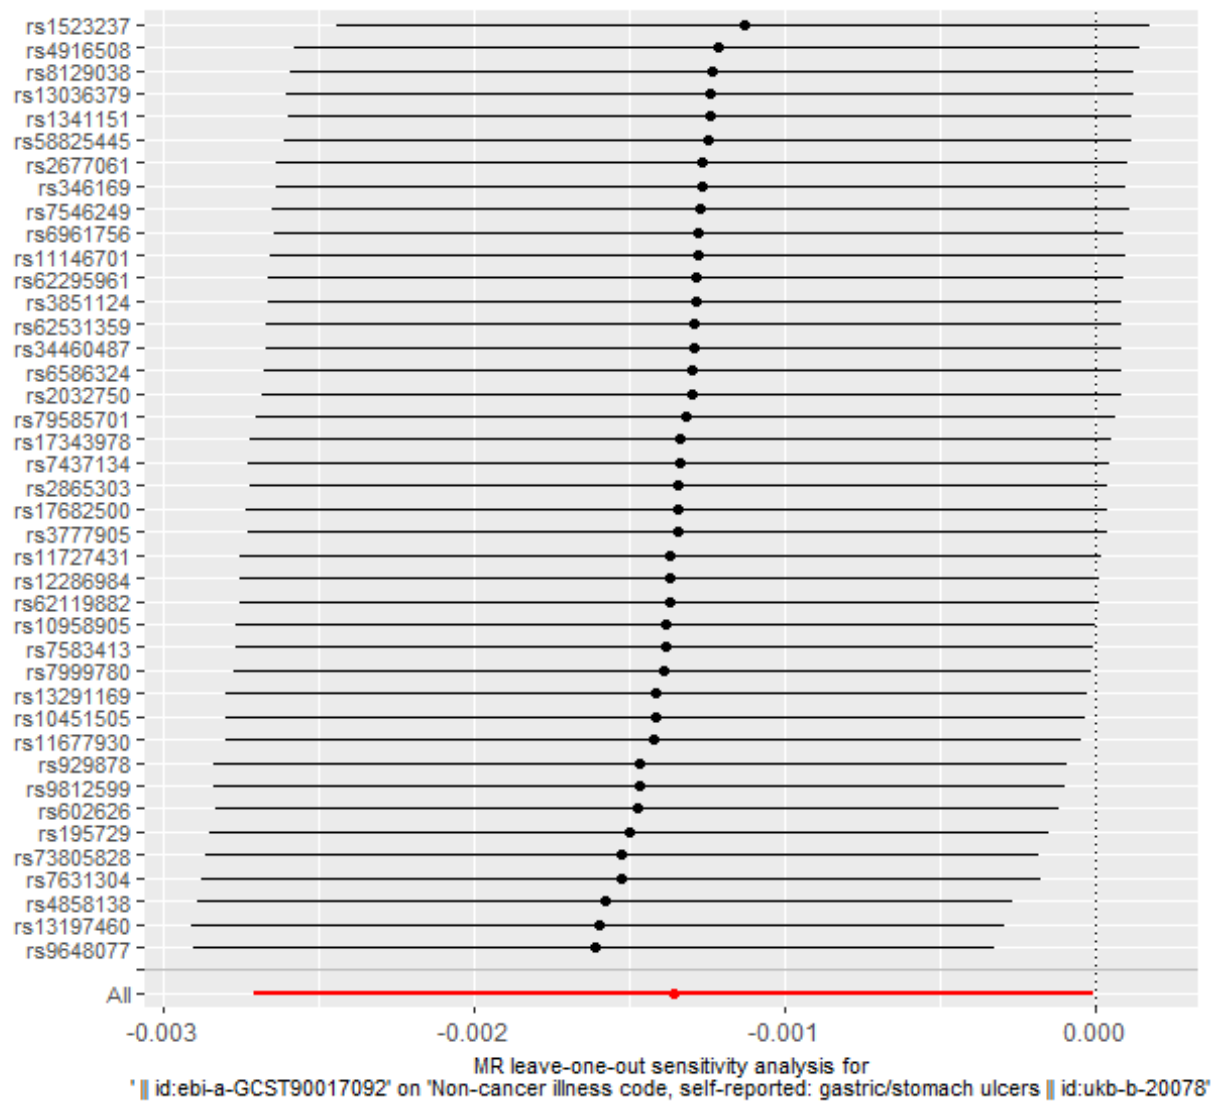

MR Method

- Inverse variance weighted
- MR Egger

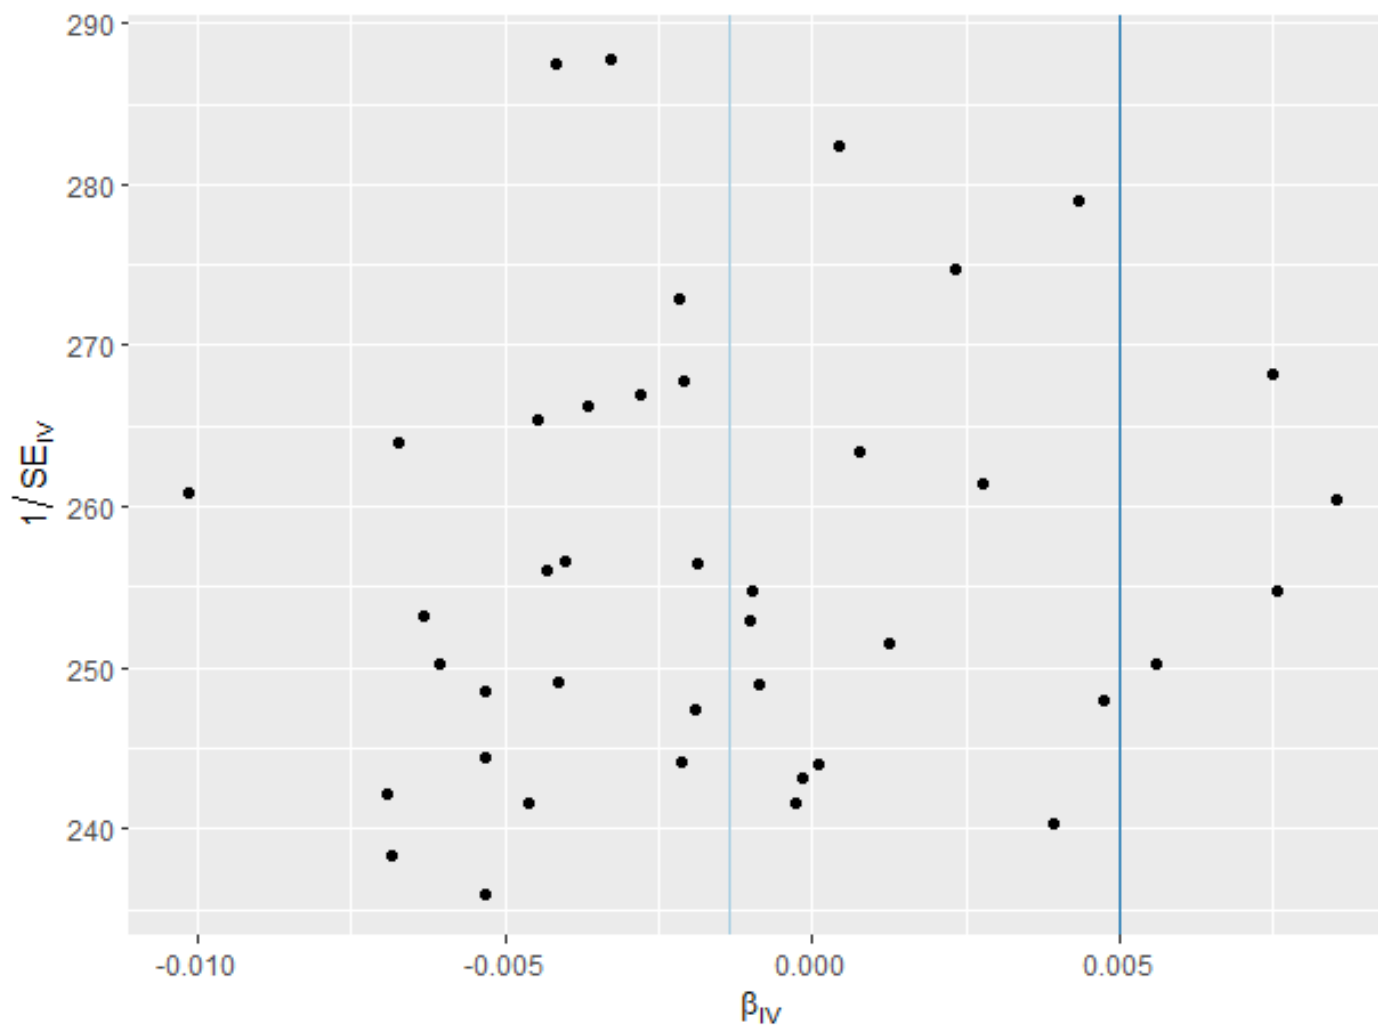

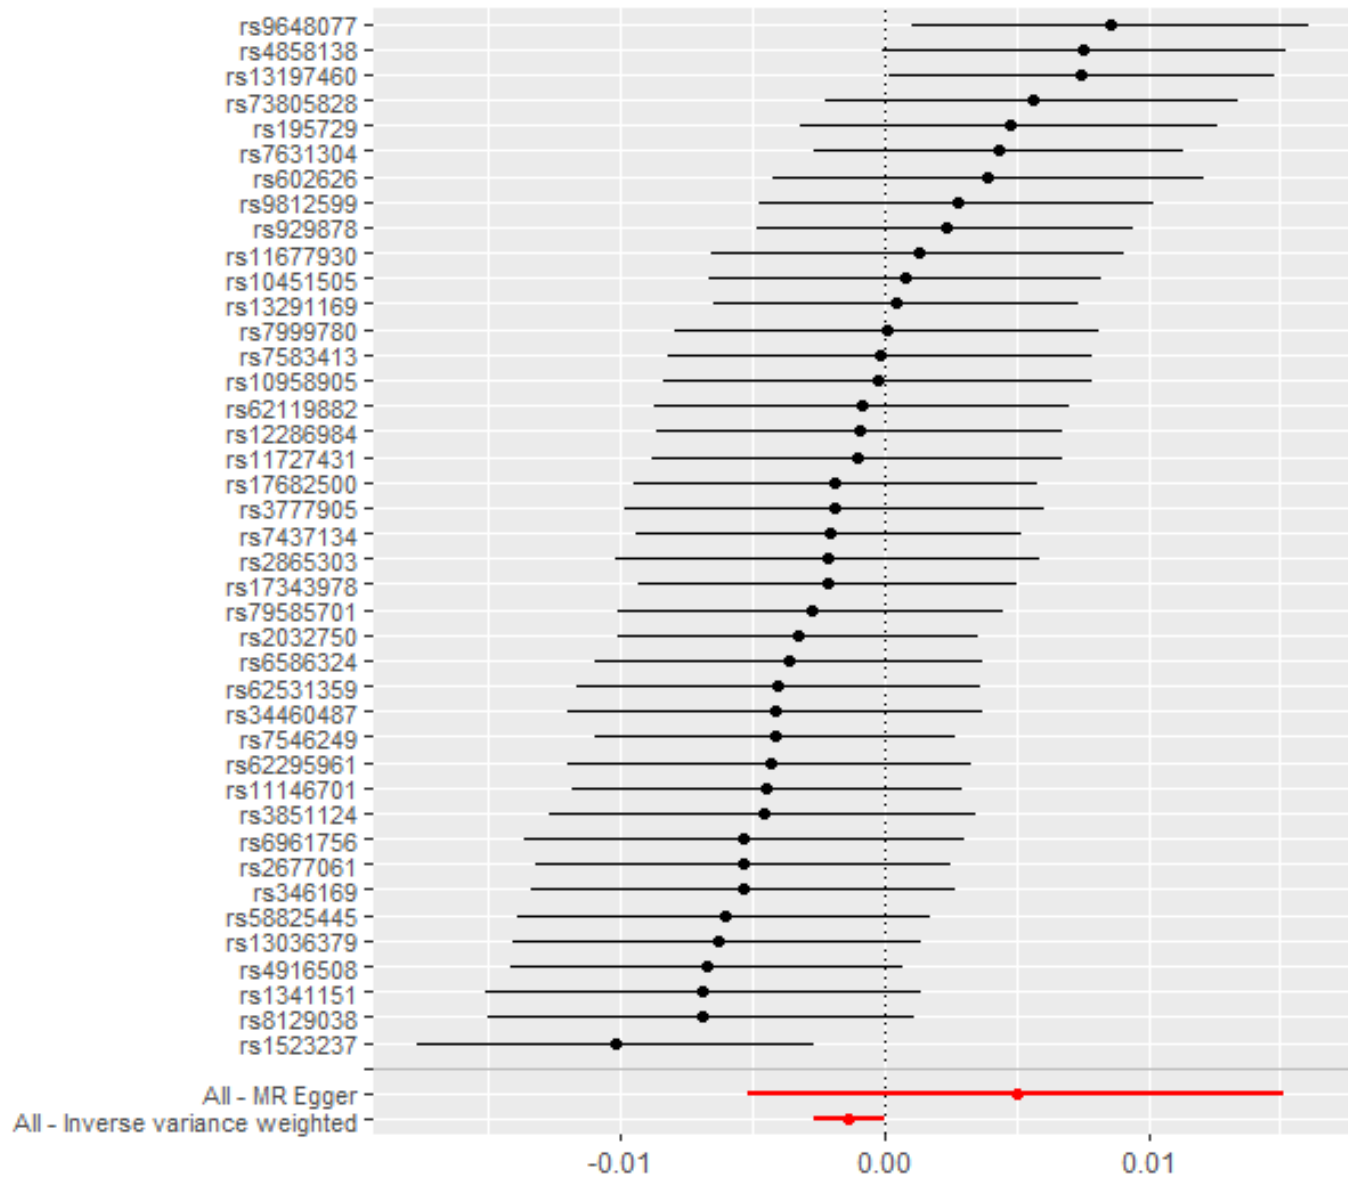

' || id:ebi-a-GCST90017092' on 'Non-cancer illness code, self-reported: gastric/stomach ulcers' || id:ukb-

on Non-cancer illness code, self-reported: gastric/stomach ulcers || id:ukb-b-20078

MR Test

- Inverse variance weighted
- MR Egger
- Simple mode
- Weighted median
- Weighted mode

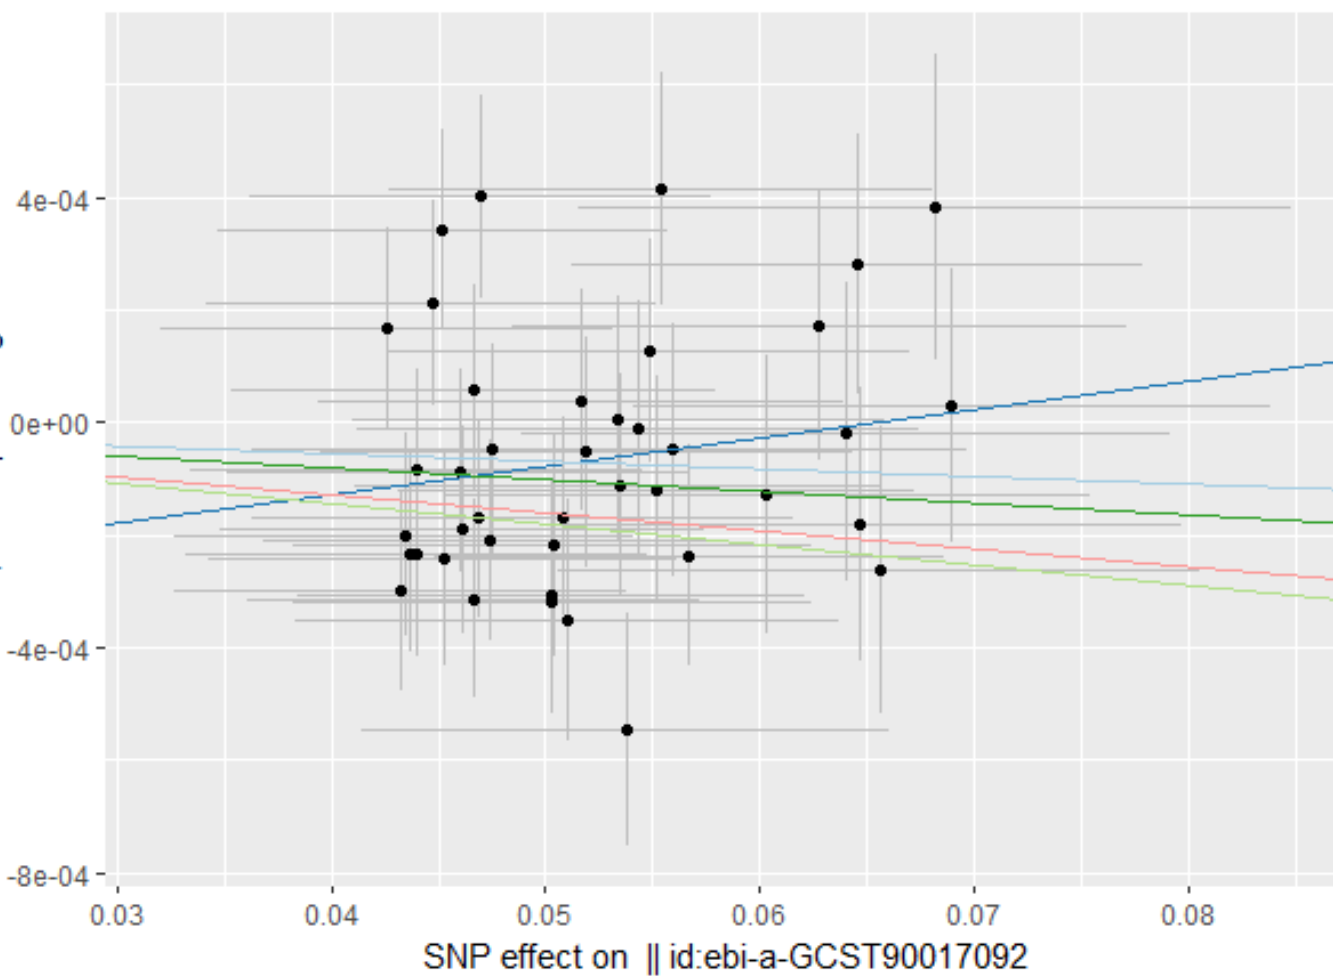



**Figure 51** Leave-one-out analysis, funnel plot, MR effect size and scatter plot for gut microbiota abundance (order Victivallales id.2254) on gastric ulcer

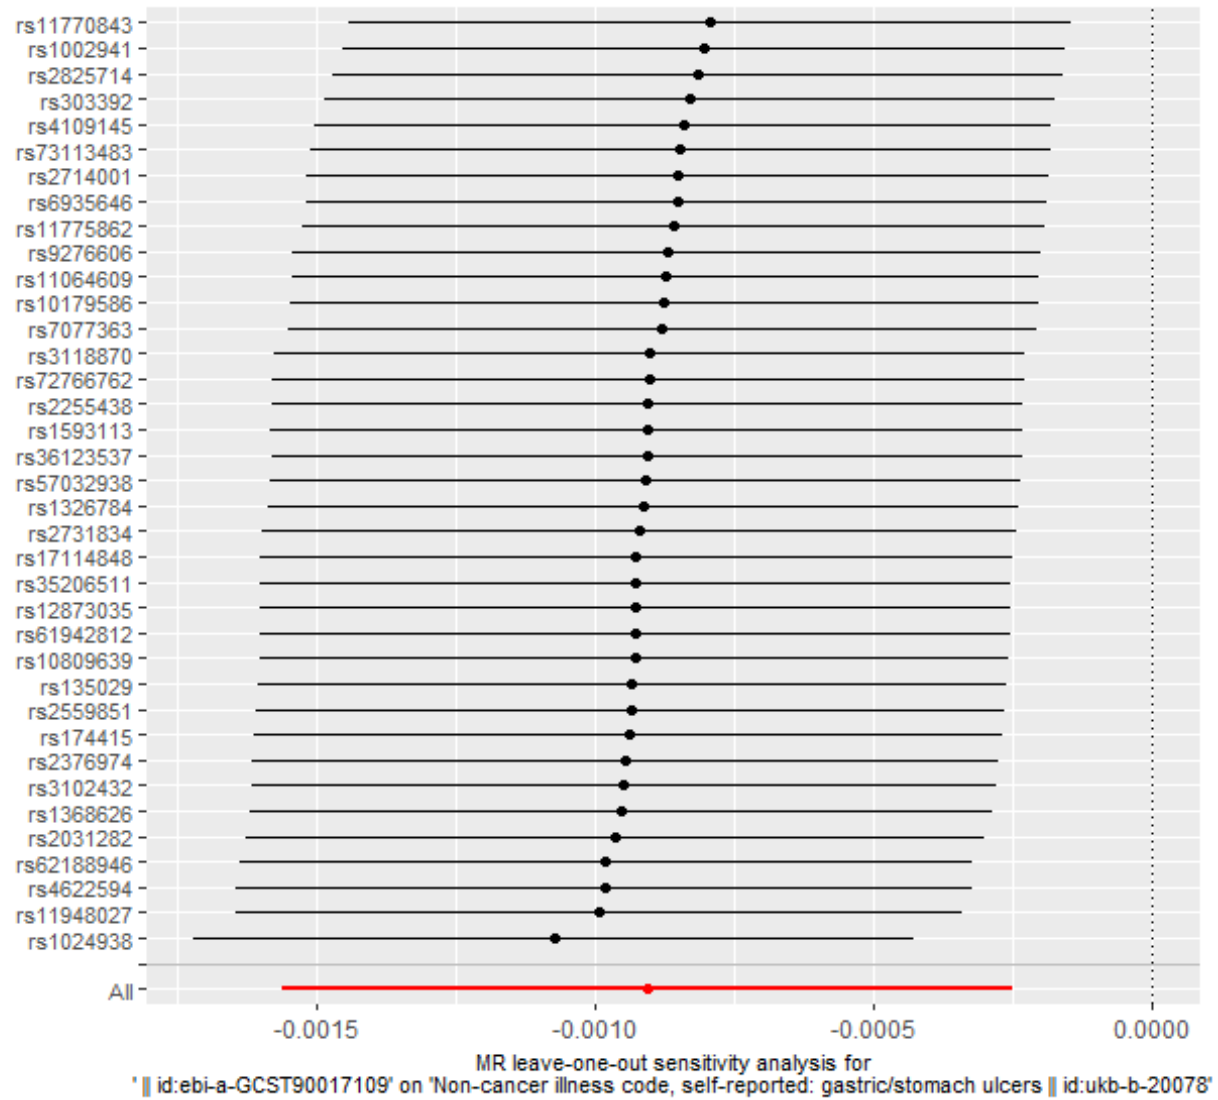

MR Method

- Inverse variance weighted
- MR Egger

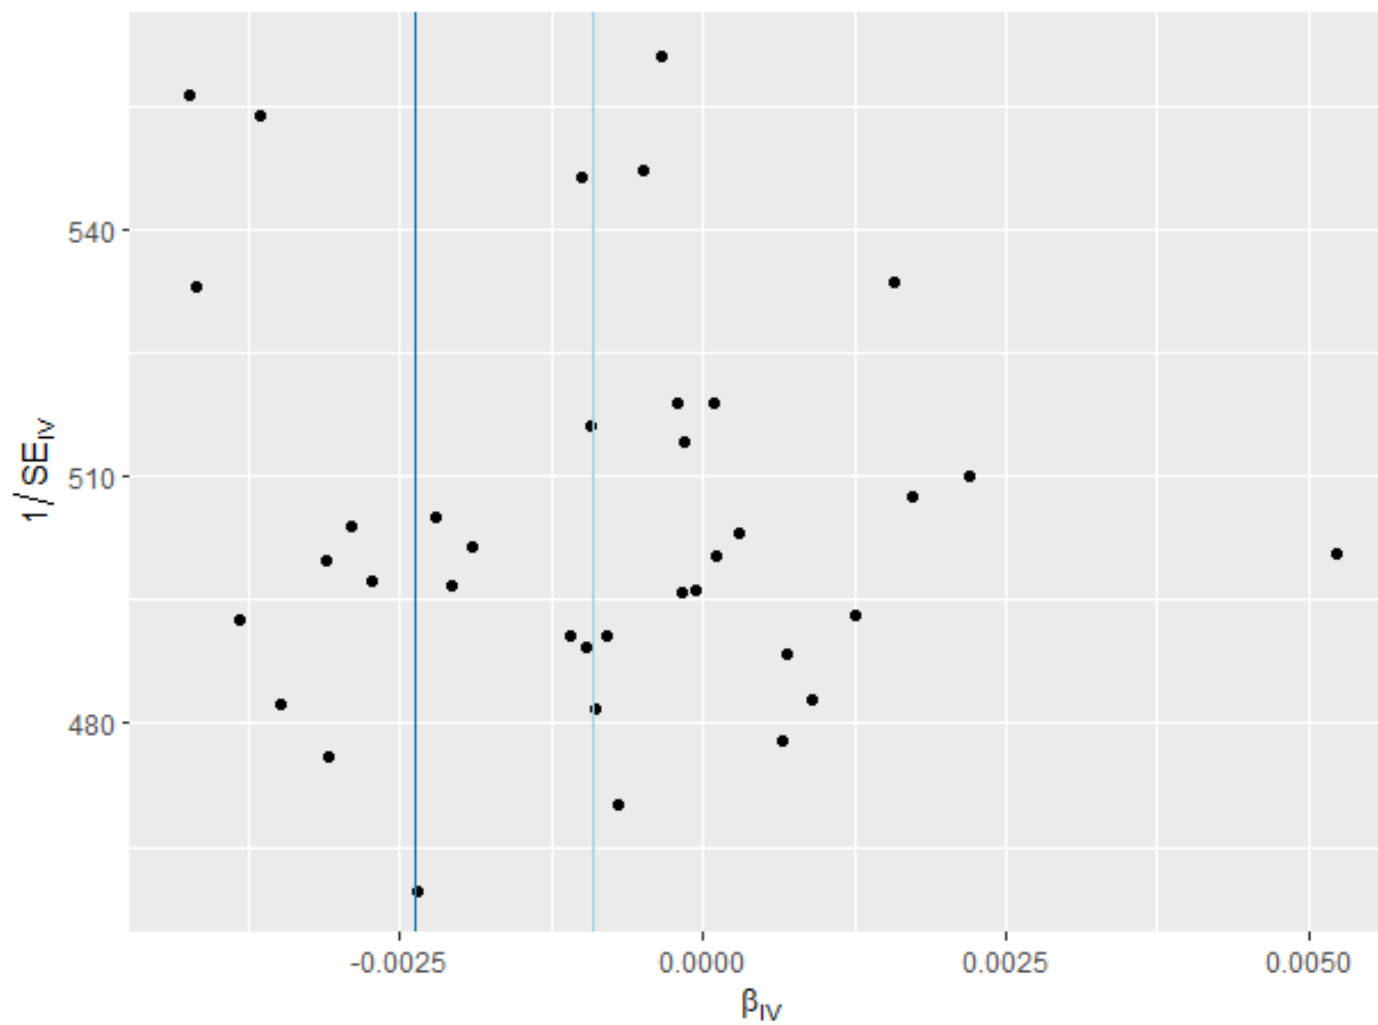

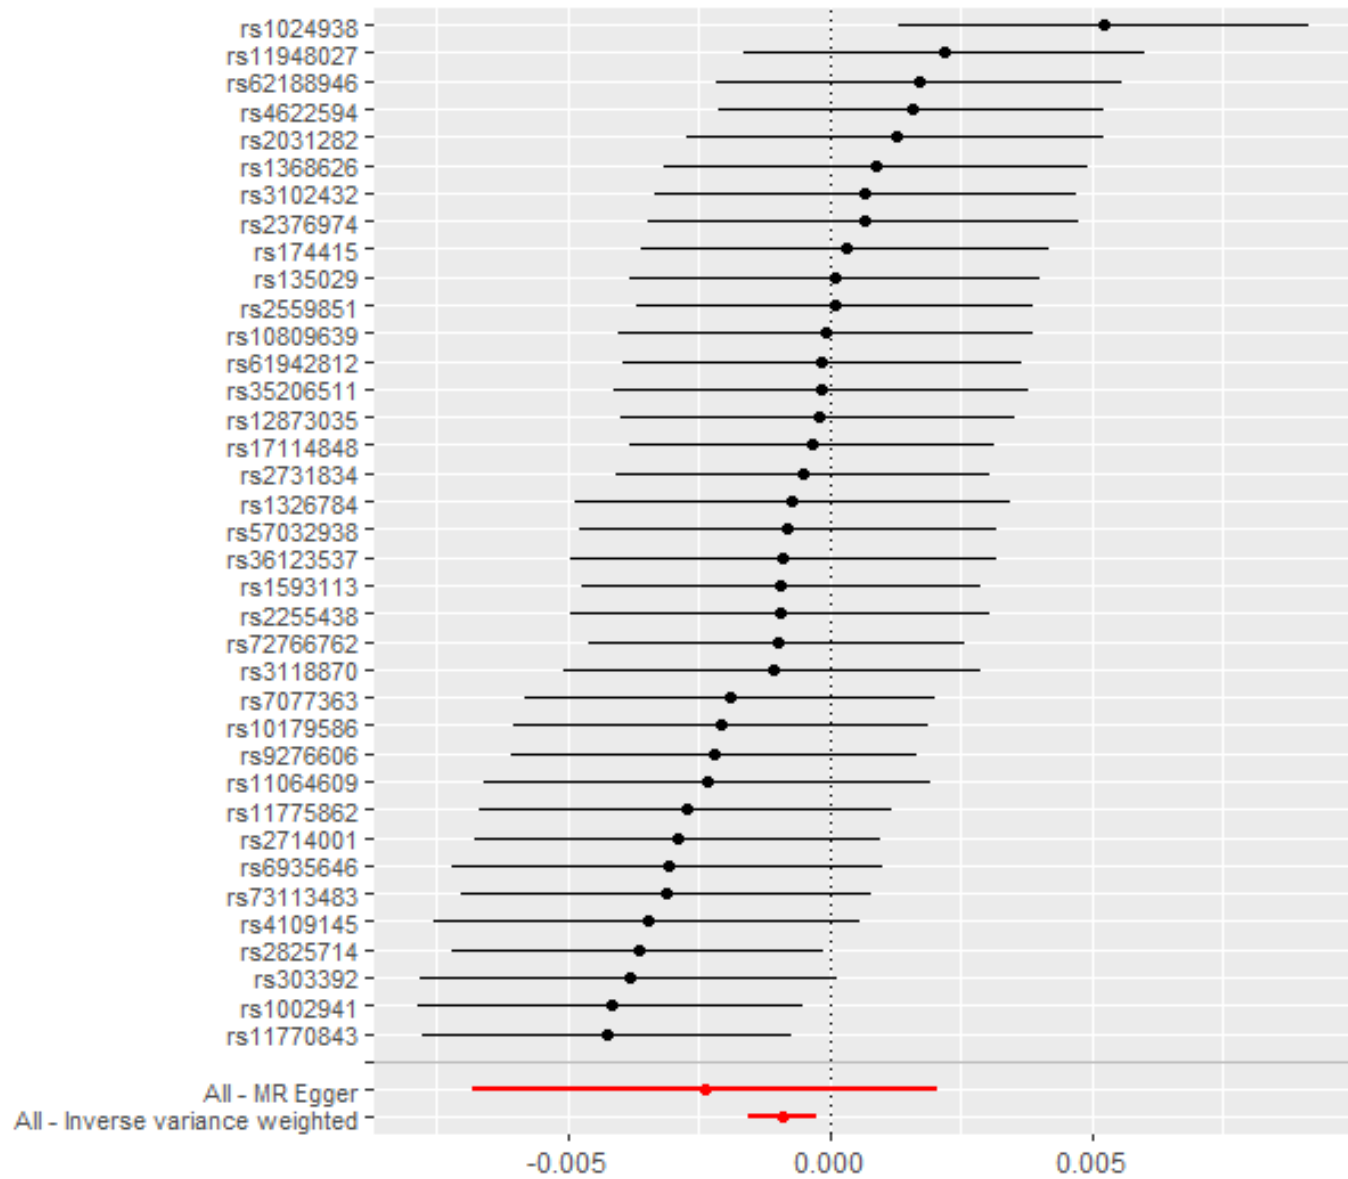

MR effect size for ' || id:ebi-a-GCST90017109' on 'Non-cancer illness code, self-reported: gastric/stomach ulcers || id:ukb-

on Non-cancer illness code, self-reported: gastric/stomach ulcers || id:ukb-b-20078

### MR Test

- Inverse variance weighted
- MR Egger
- Simple mode
- Weighted median
- Weighted mode

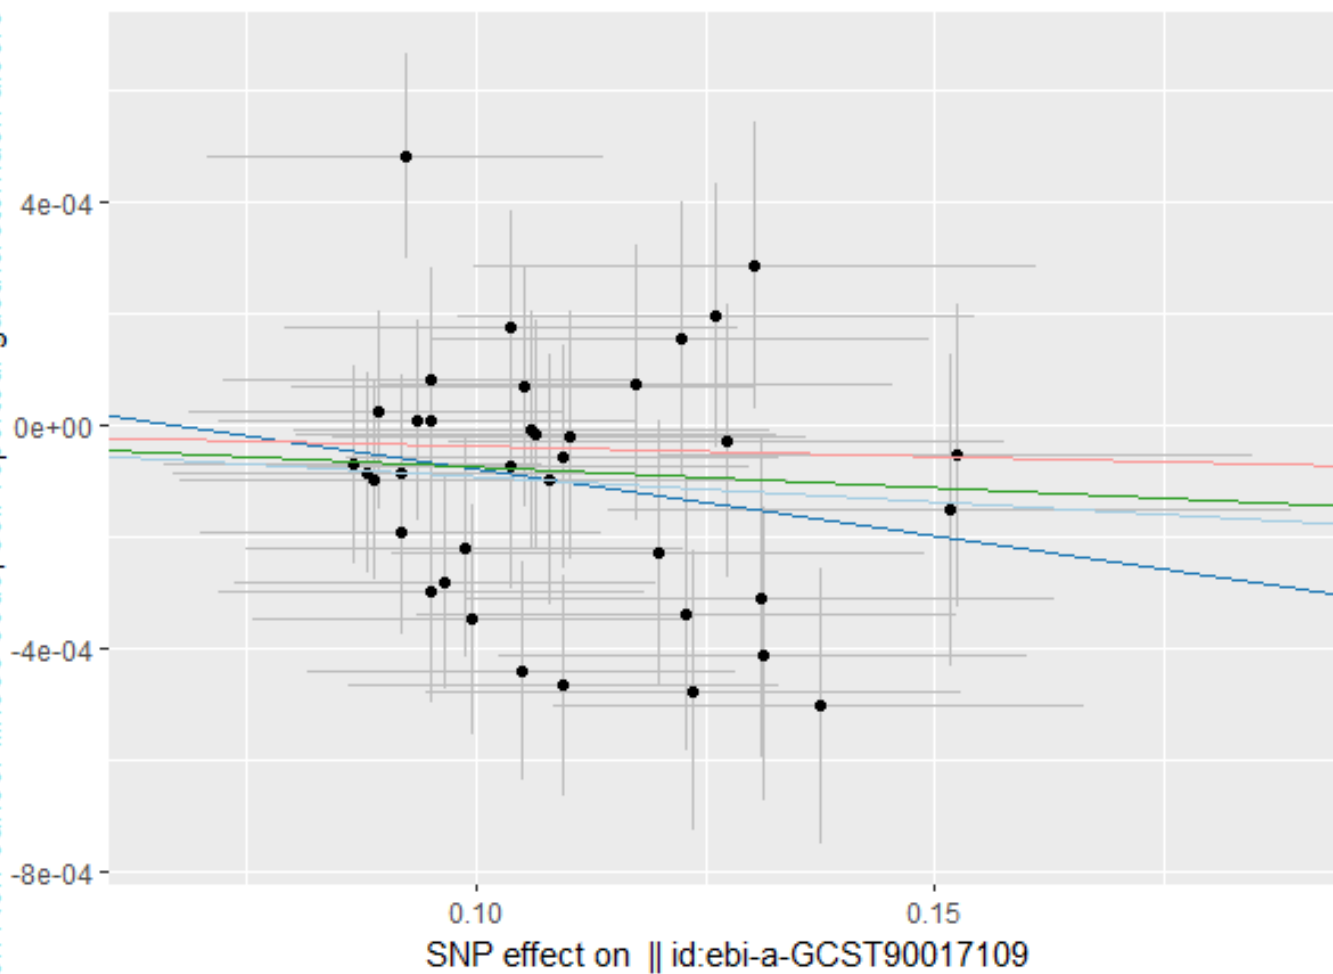

**Figure 52** Leave-one-out analysis, funnel plot, MR effect size and scatter plot for gut microbiota abundance (class Gammaproteobacteria id.3303) on duodenal ulcer

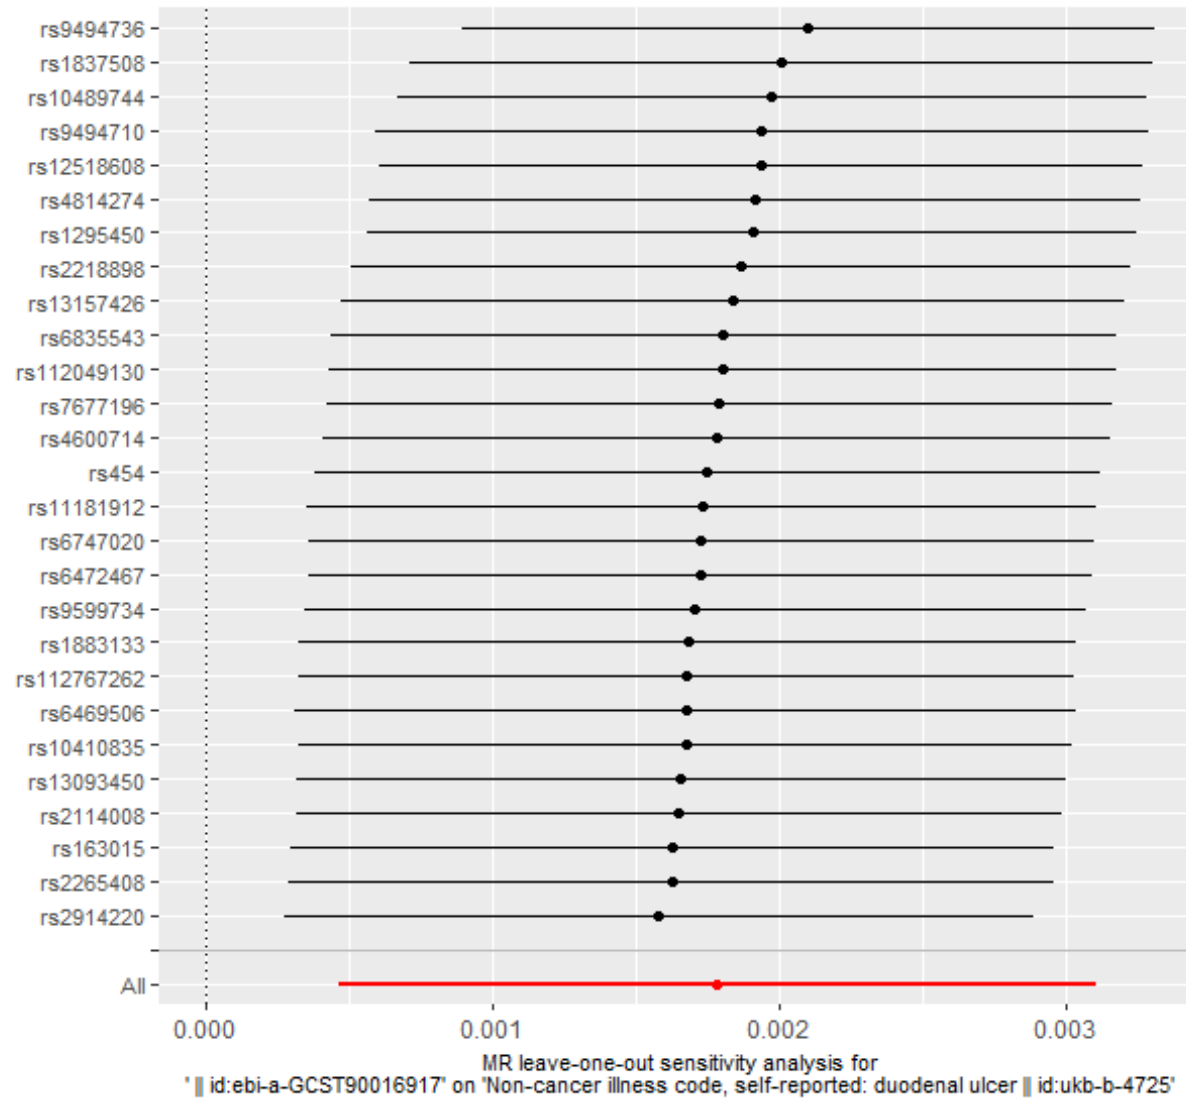

MR Method

- Inverse variance weighted
- MR Egger

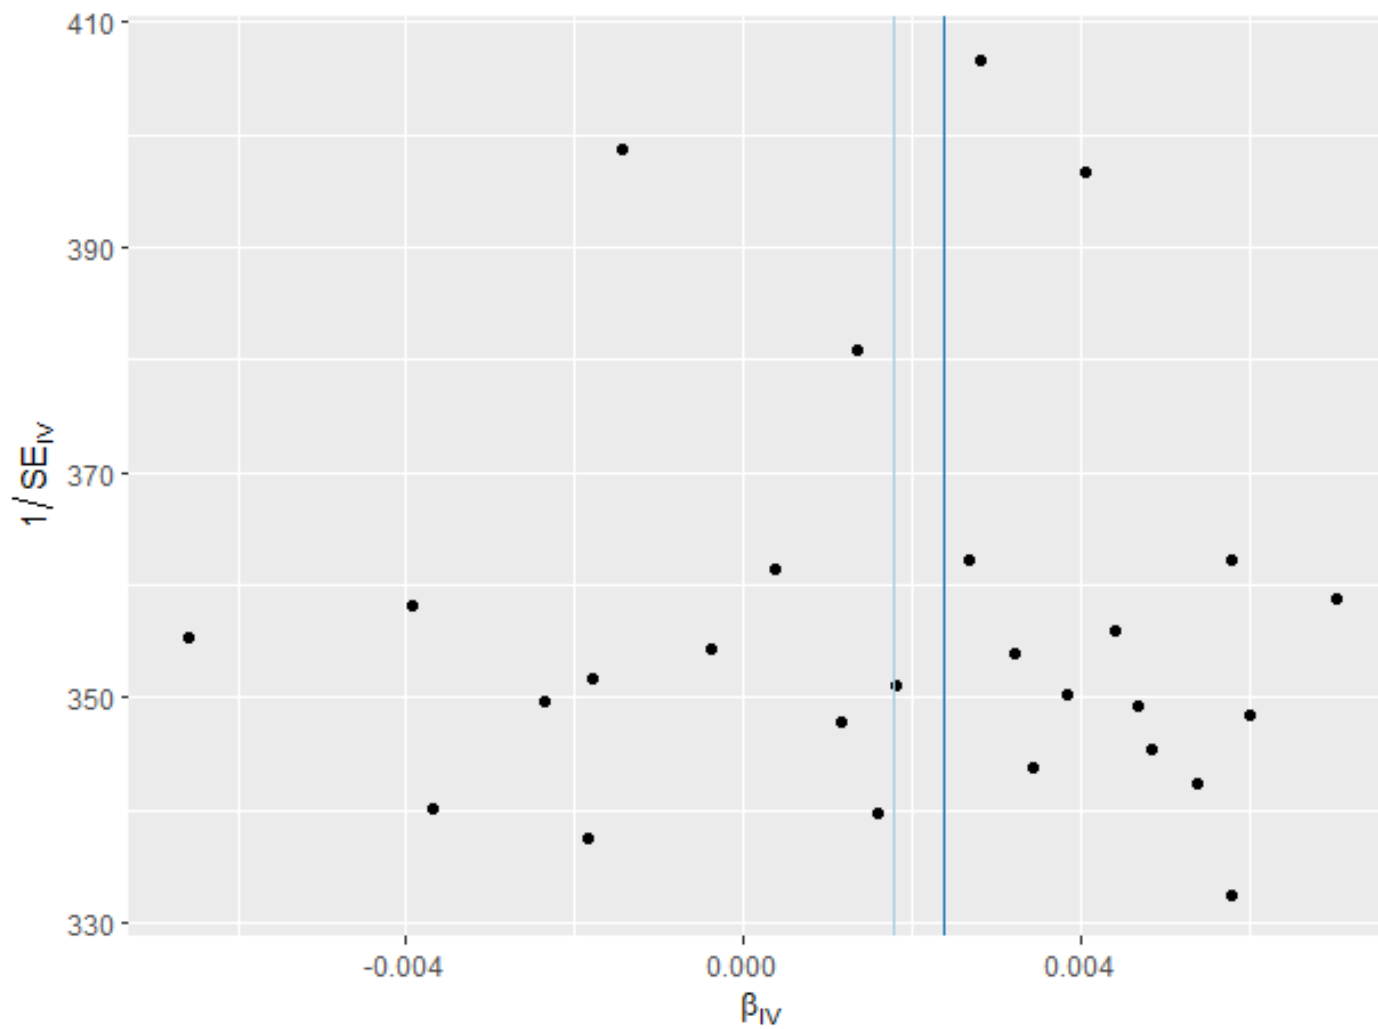

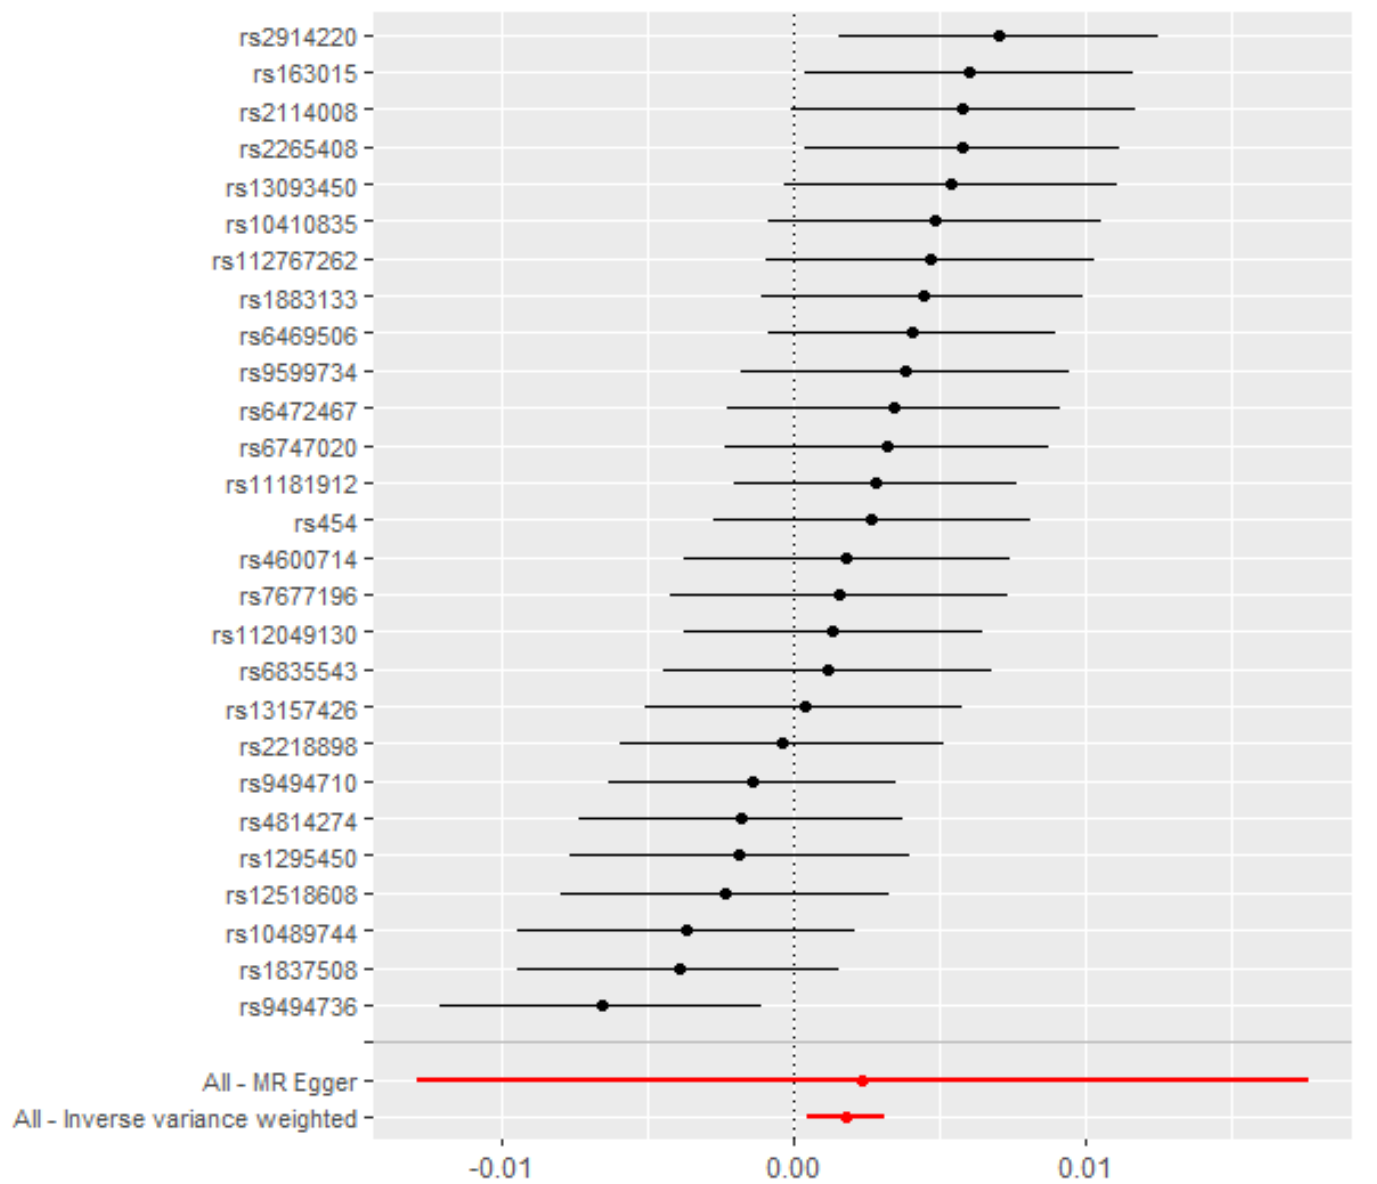

' || id:ebi-a-GCST90016917' on 'Non-cancer illness code, self-reported: duodenal ulcer' || id:ukb-b-4

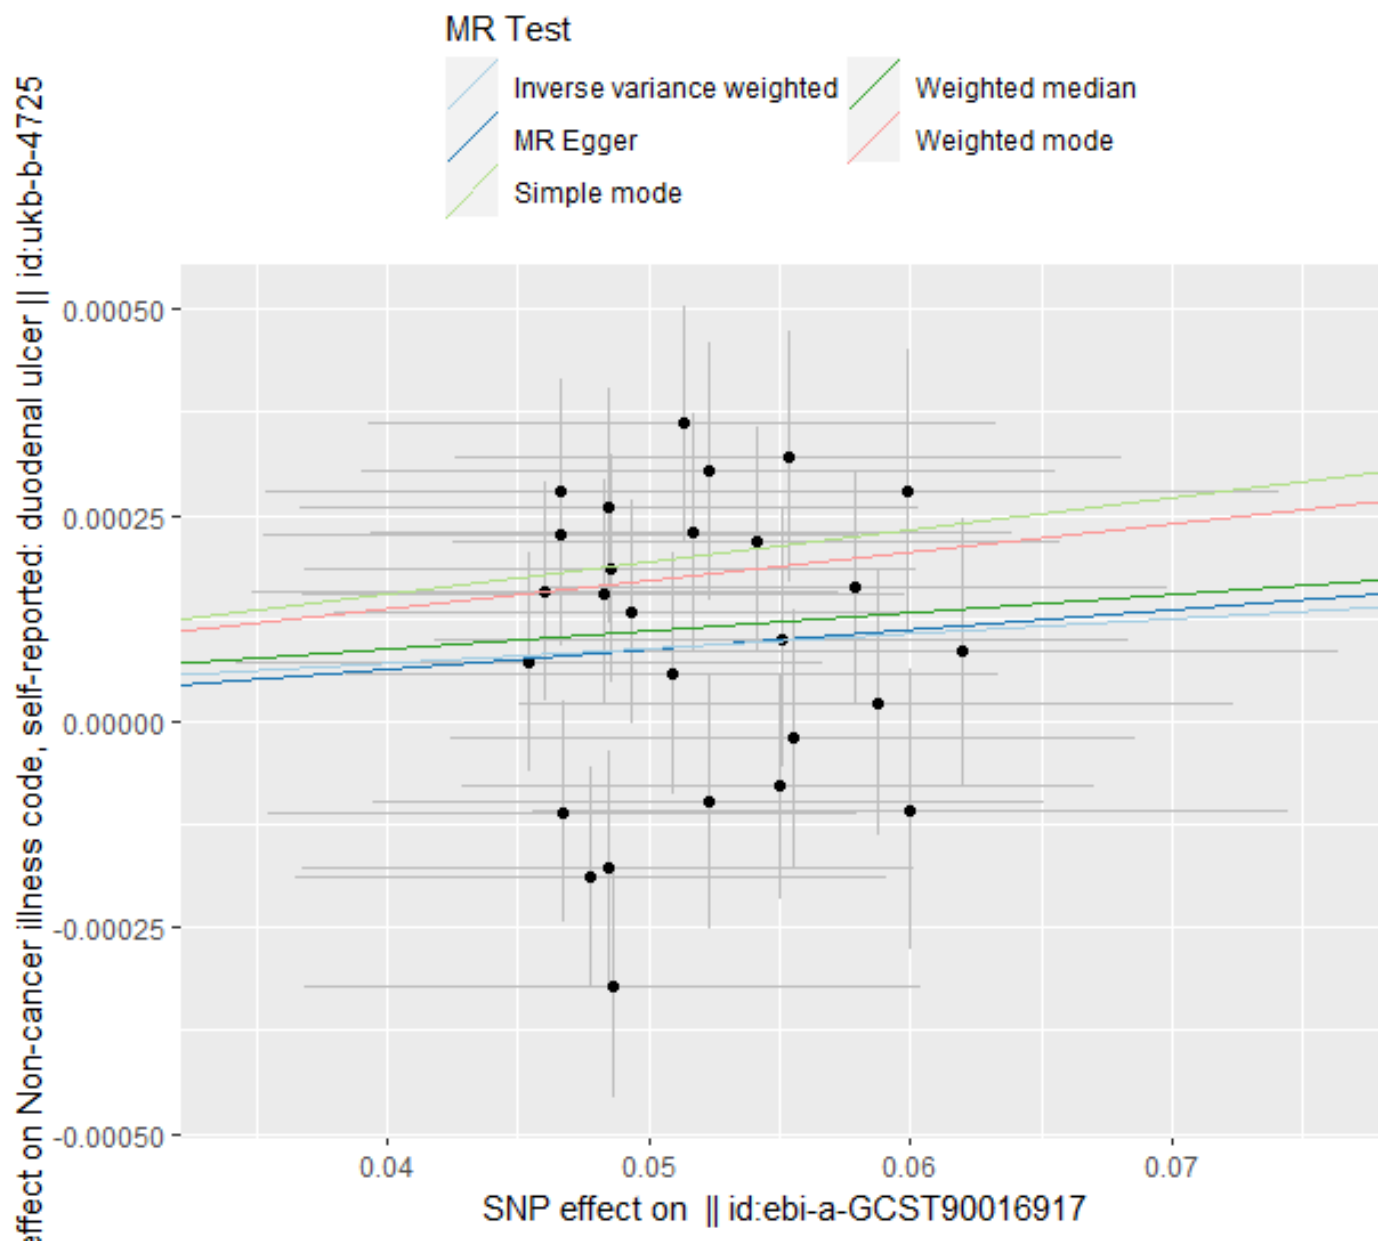



**Figure 53** Leave-one-out analysis, funnel plot, MR effect size and scatter plot for gut microbiota abundance (class Verrucomicrobiae id.4029) on duodenal ulcer

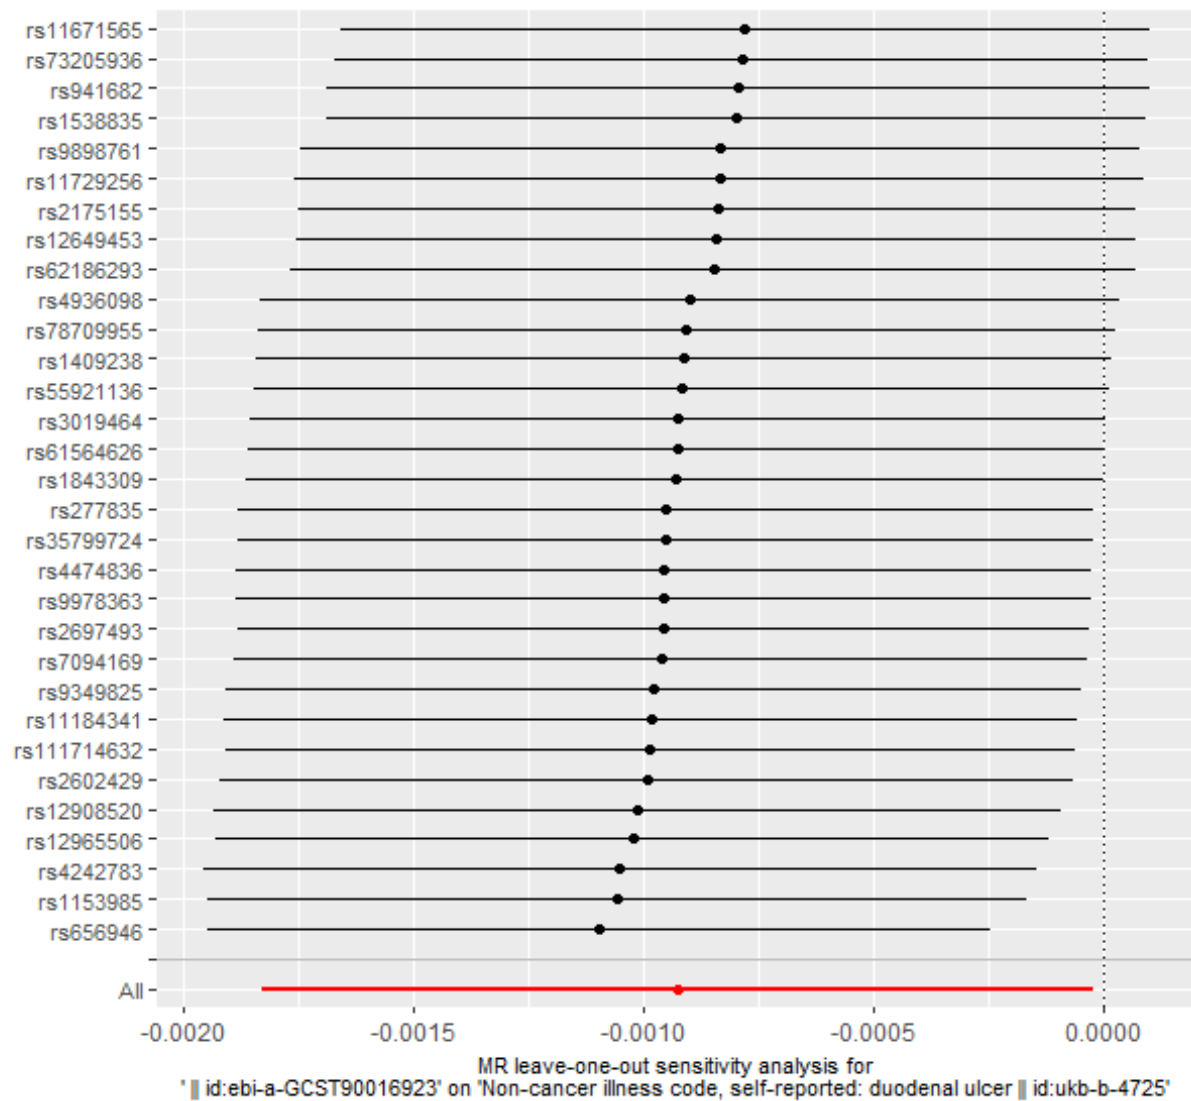

MR Method

- Inverse variance weighted
- MR Egger

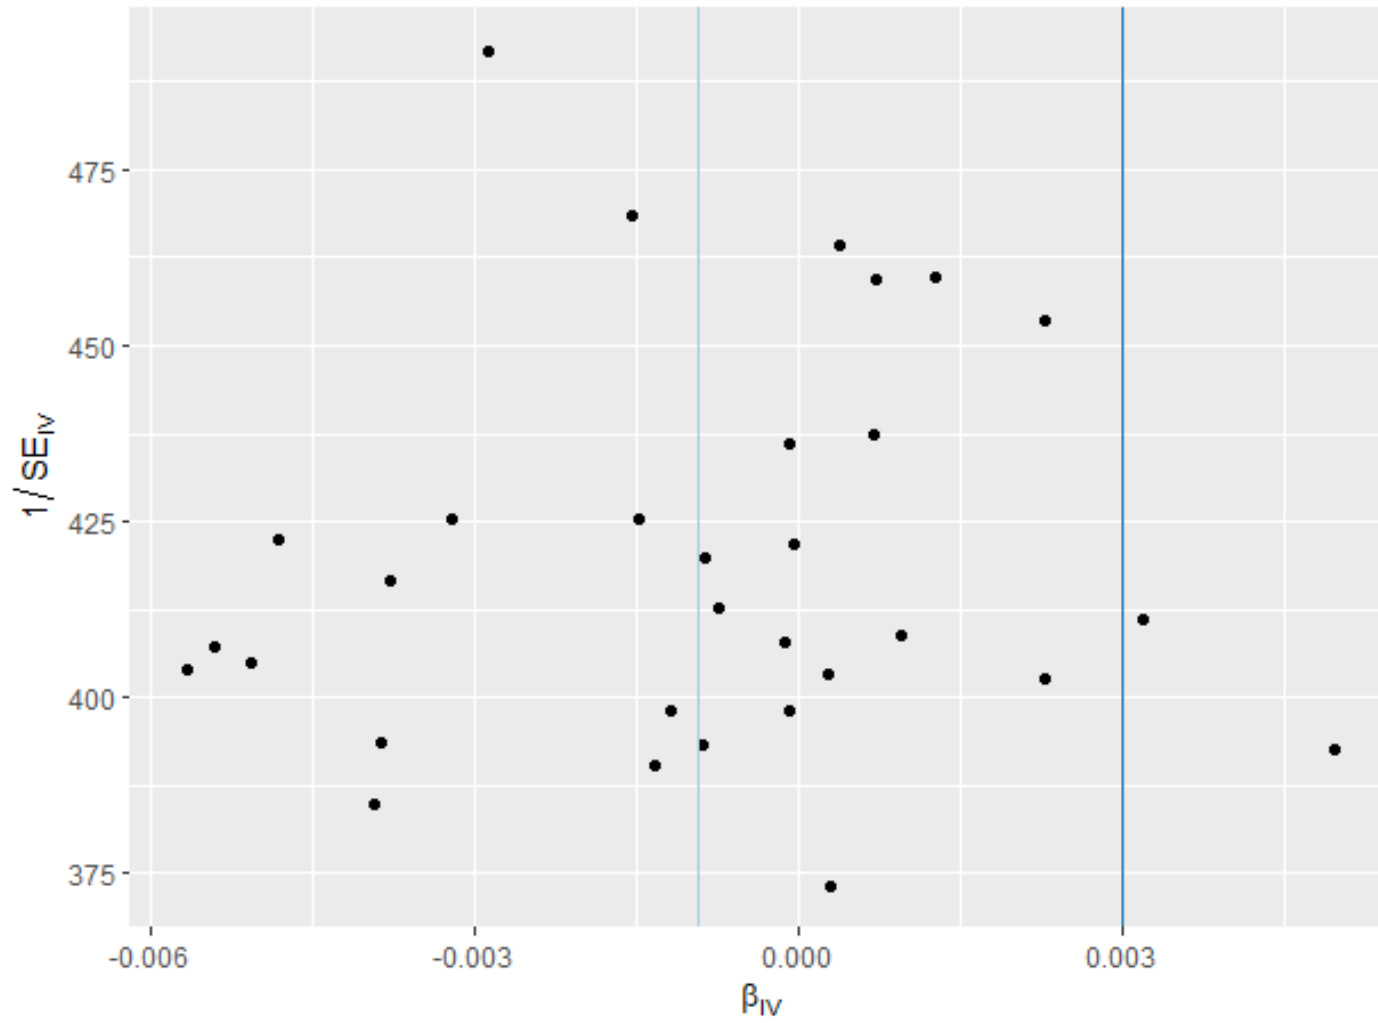

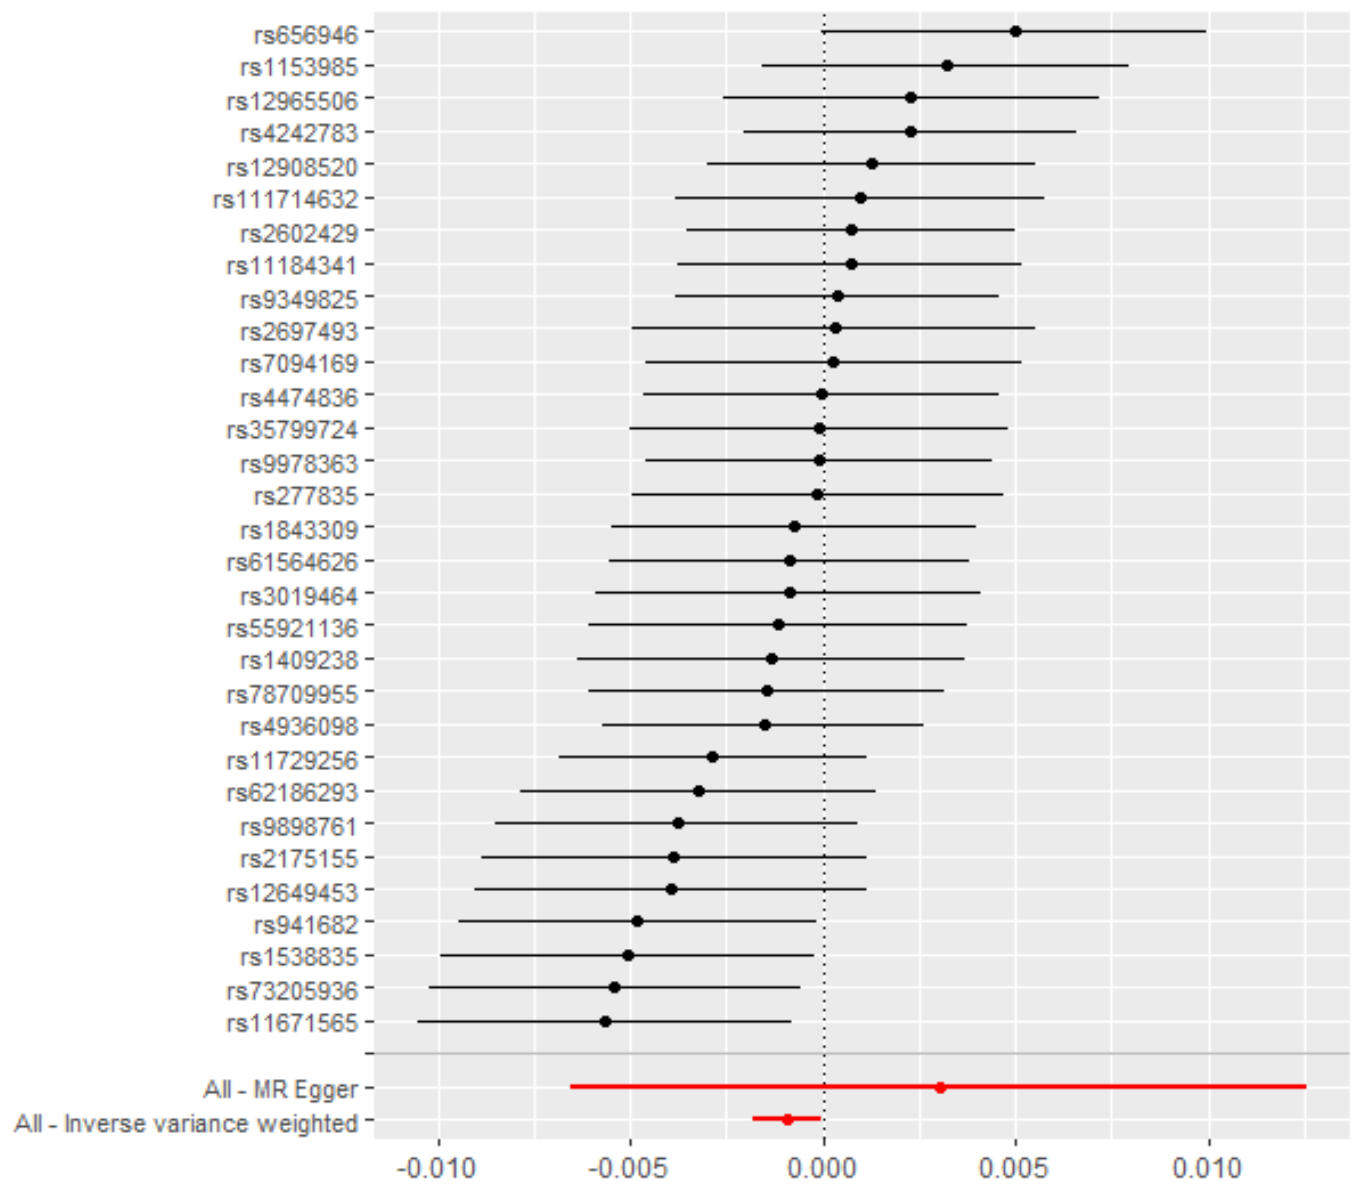

MR effect size for ' || id:ebi-a-GCST90016923' on 'Non-cancer illness code, self-reported: duodenal ulcer' || id:ukb-b-4

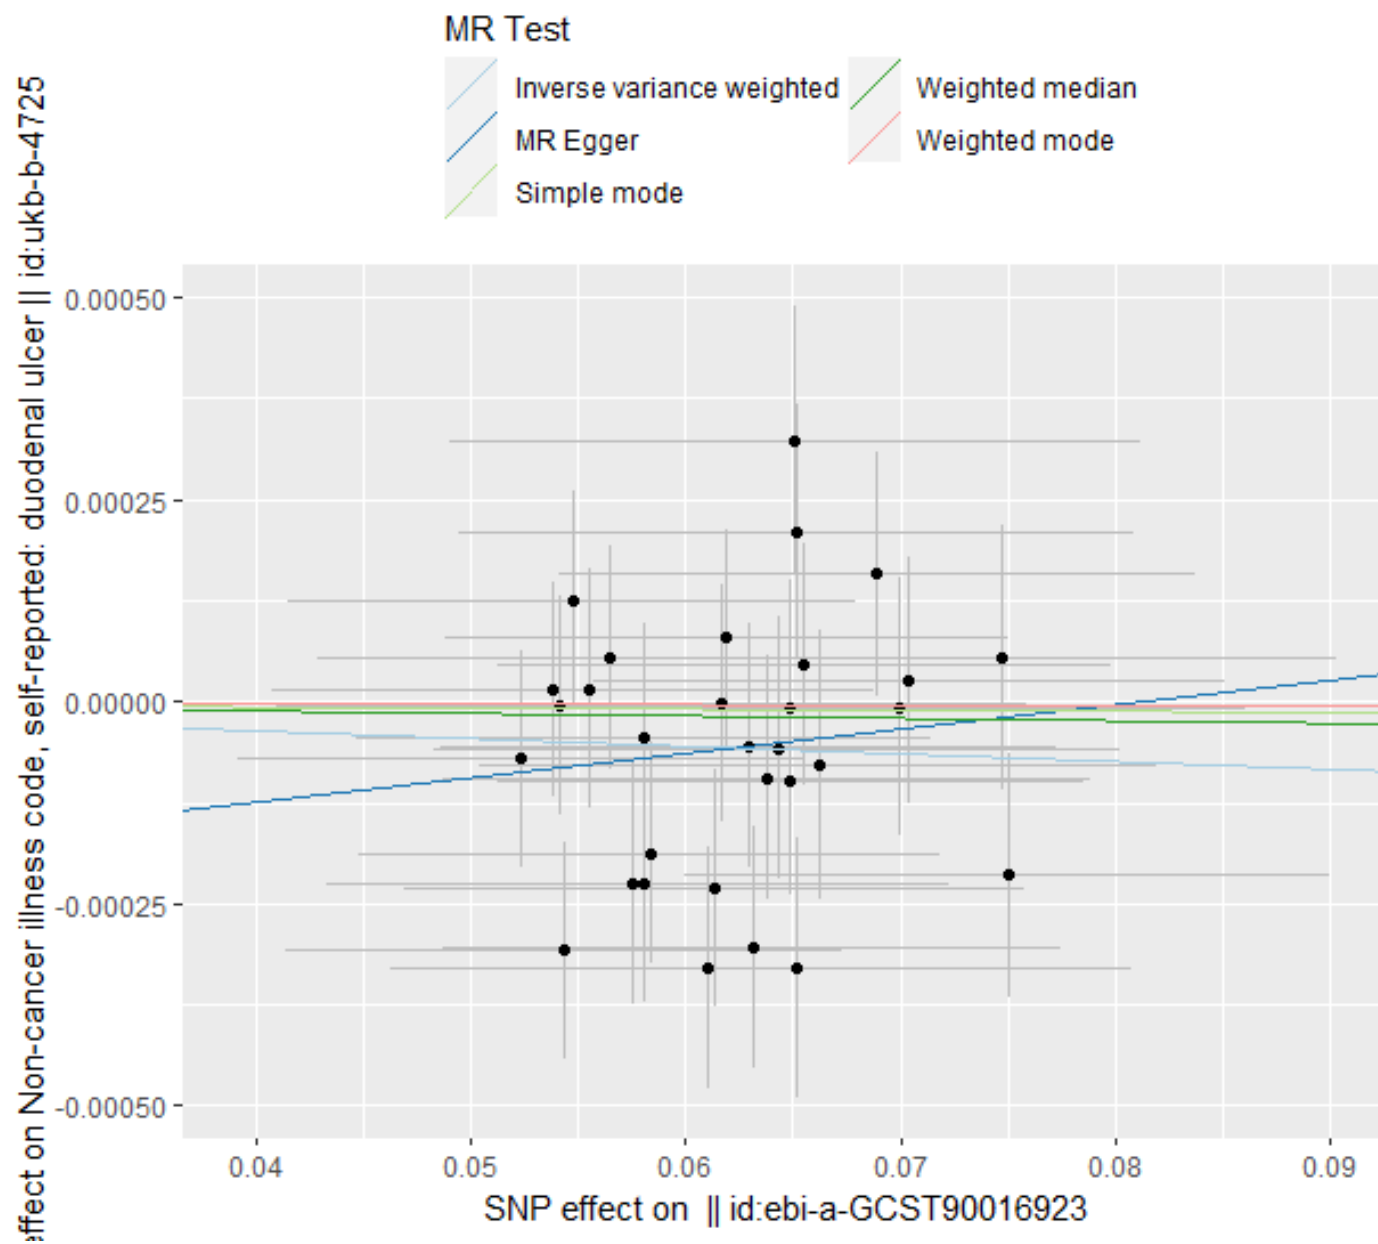

**Figure 54** Leave-one-out analysis, funnel plot, MR effect size and scatter plot for gut microbiota abundance (family Bacteroidaceae id.917) on duodenal ulcer

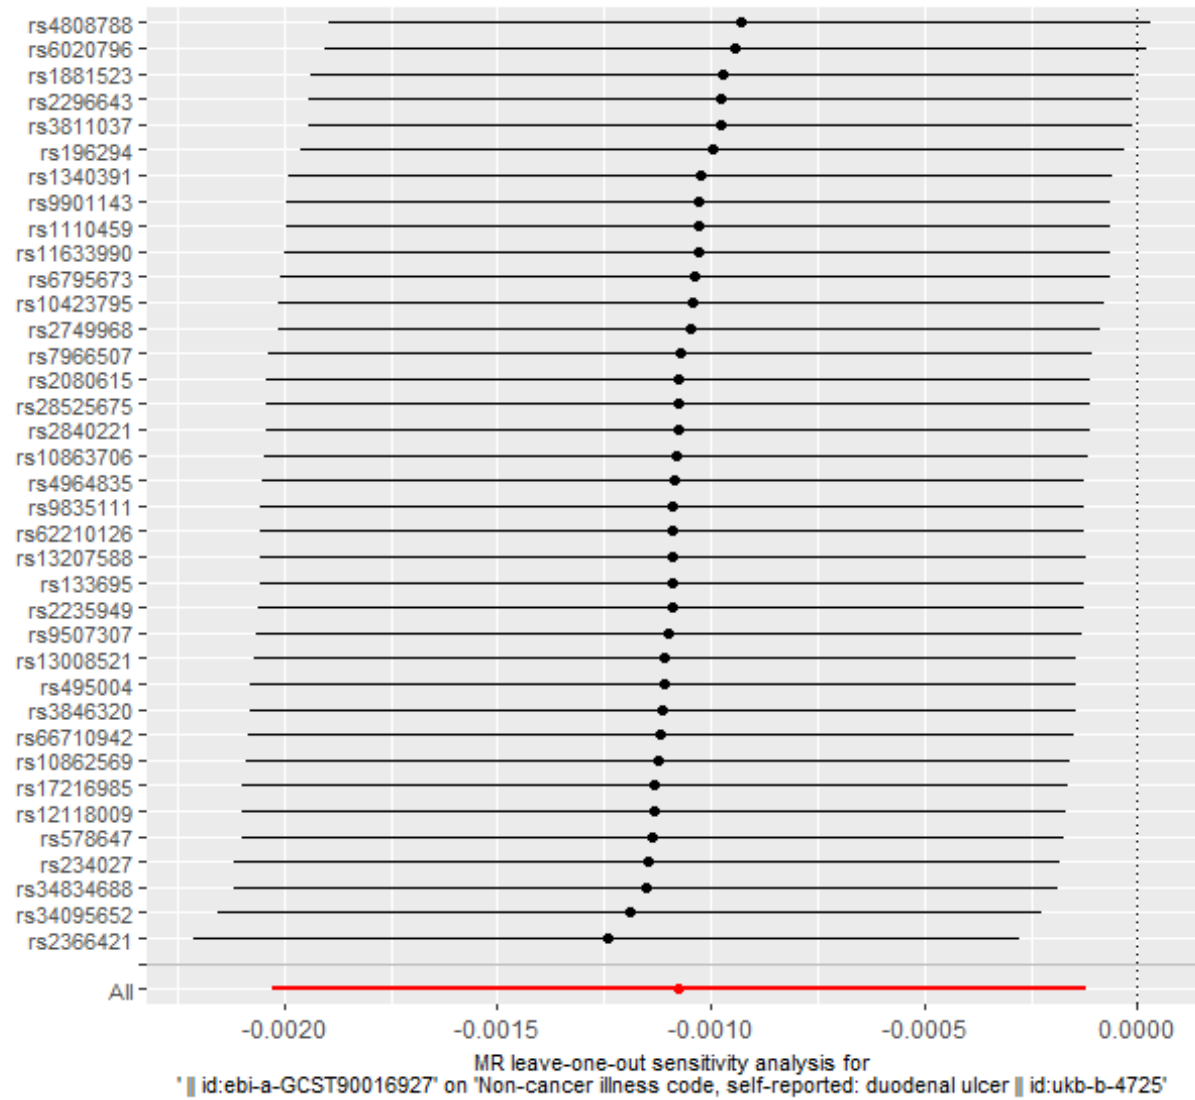

MR Method

- Inverse variance weighted
- MR Egger

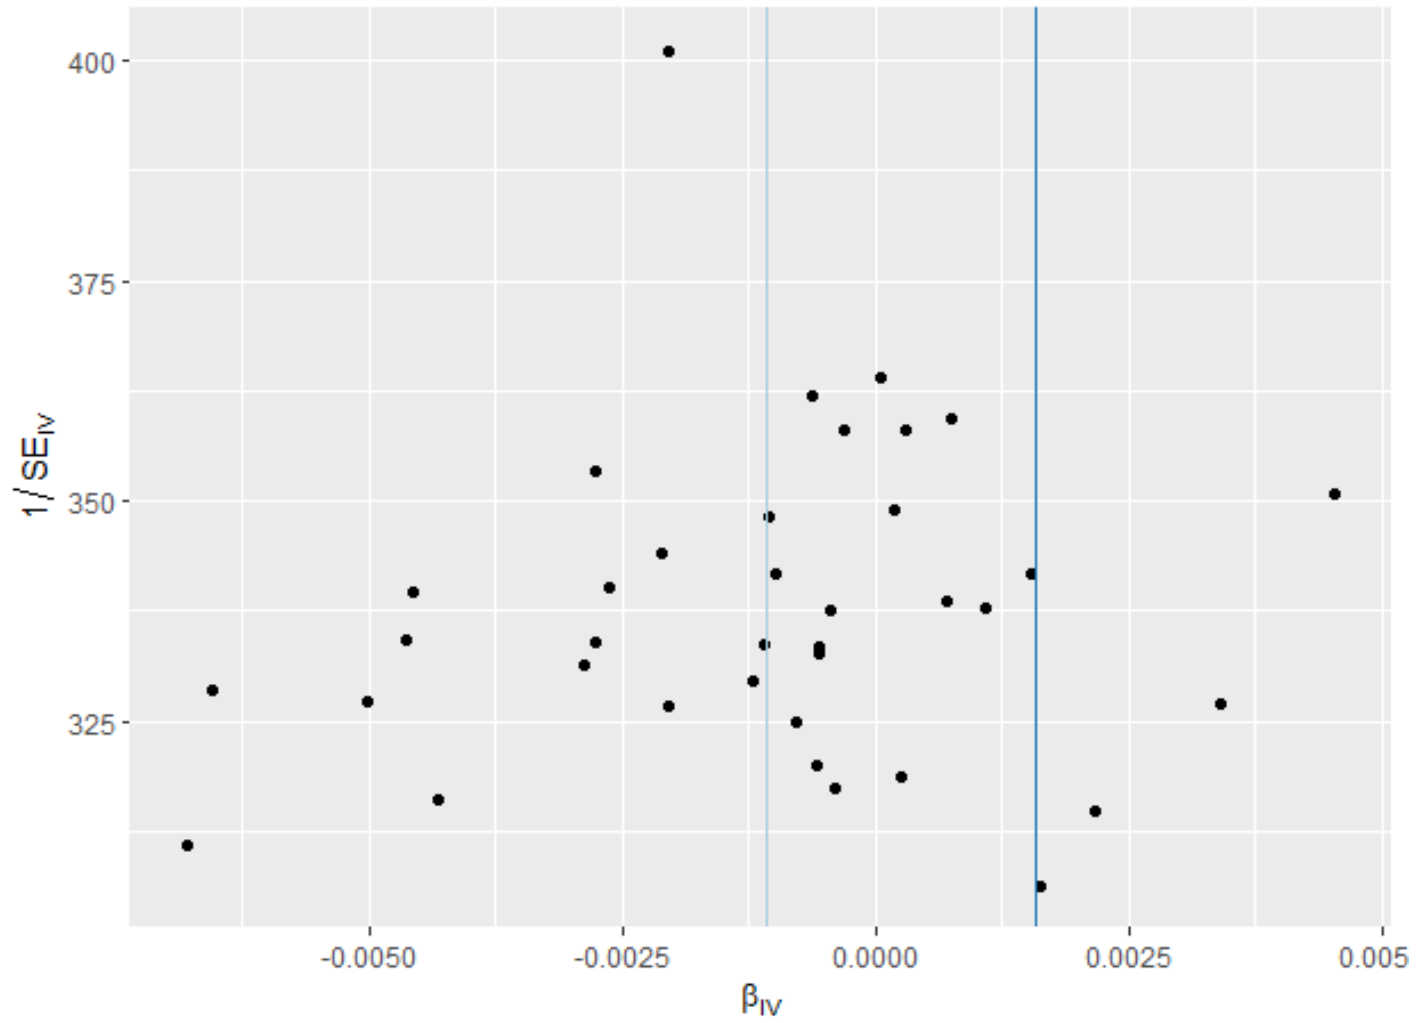

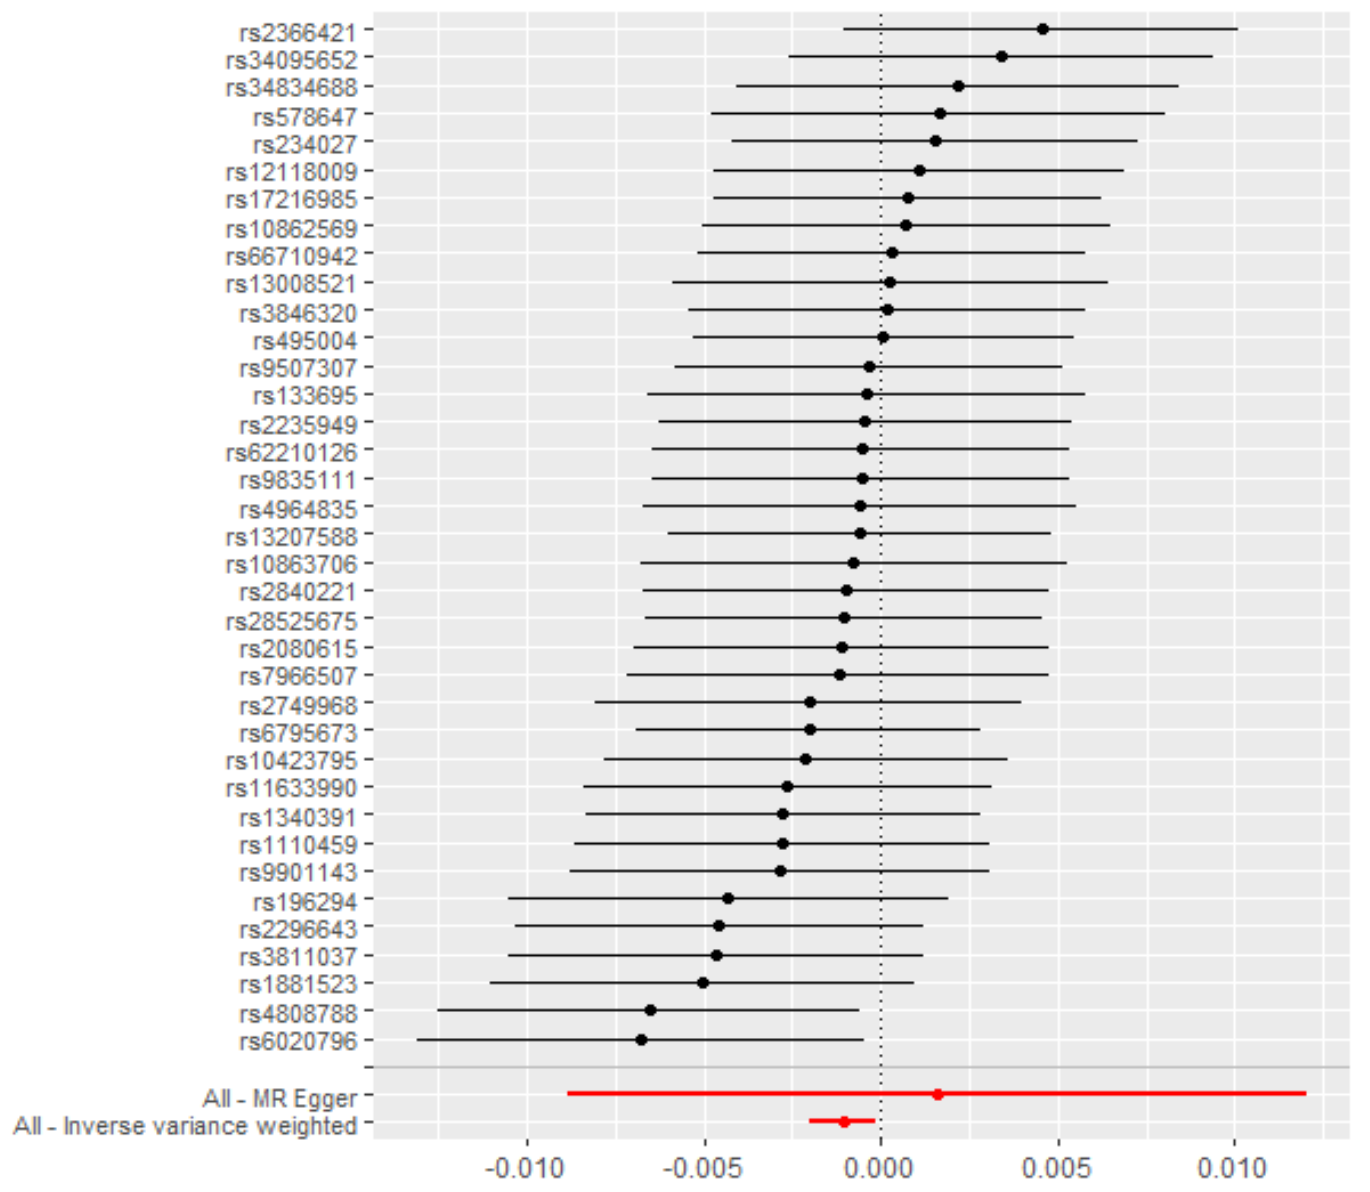

' || id:ebi-a-GCST90016927' on 'Non-cancer illness code, self-reported: duodenal ulcer' || id:ukb-b-4

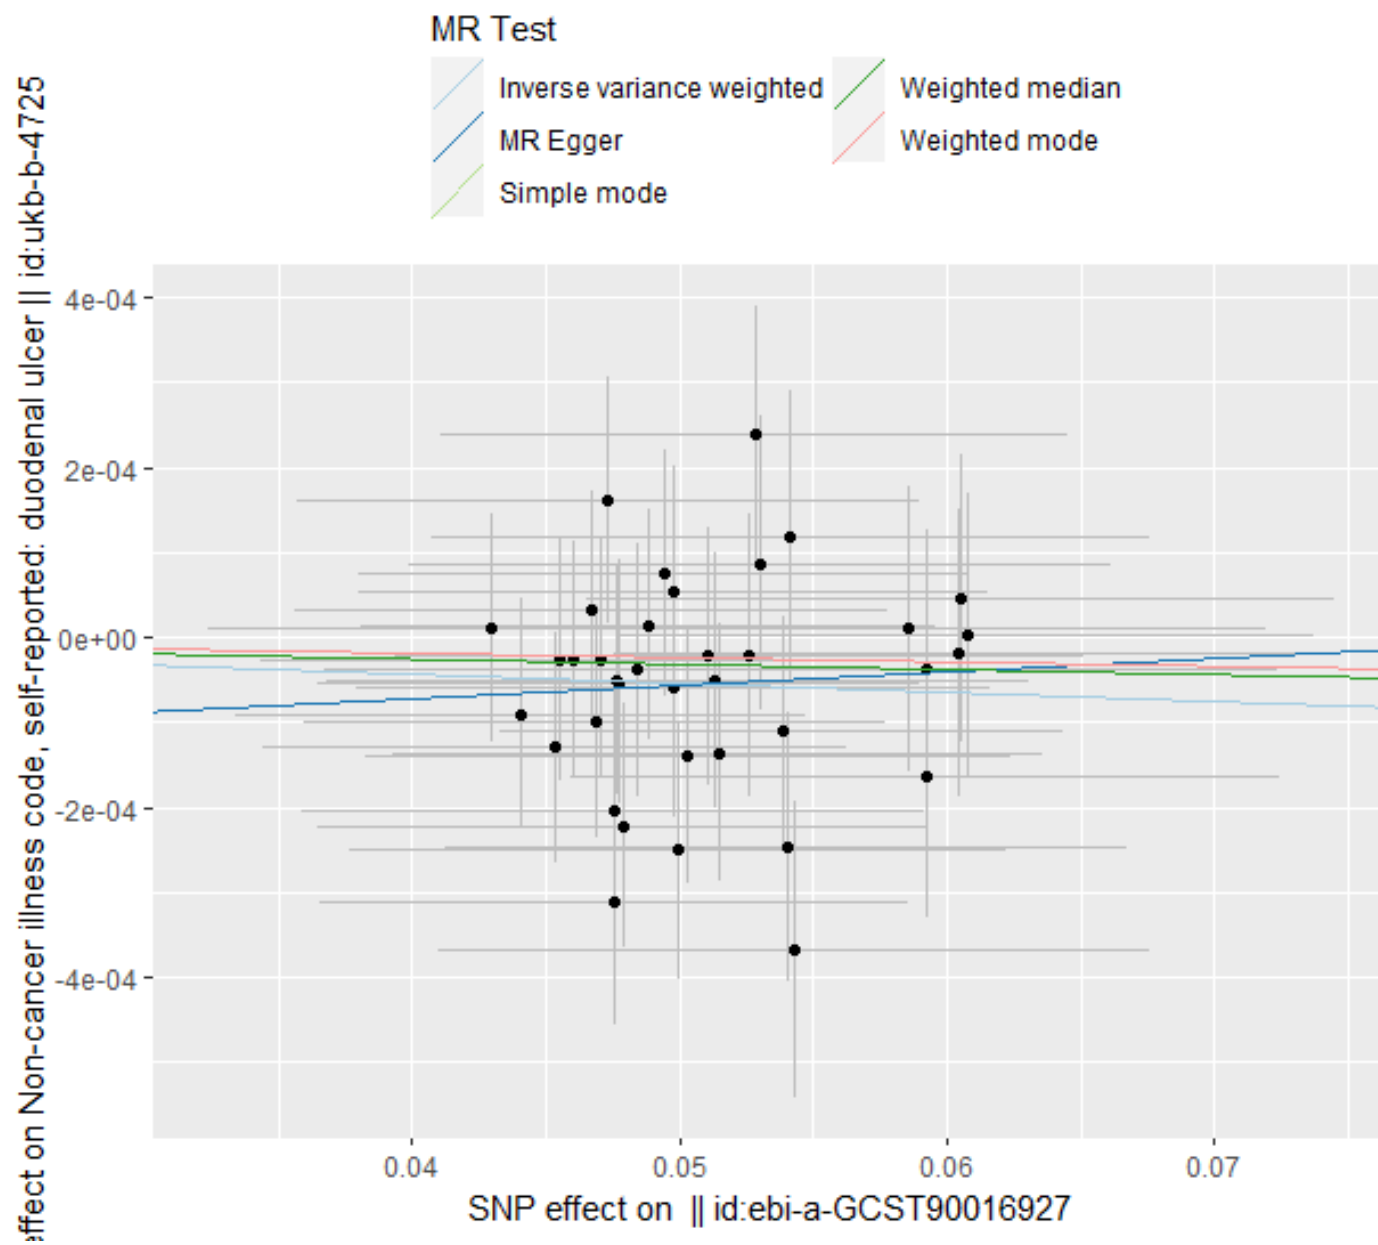



**Figure 55** Leave-one-out analysis, funnel plot, MR effect size and scatter plot for gut microbiota abundance (family Peptostreptococcaceae id.2042) on duodenal ulcer

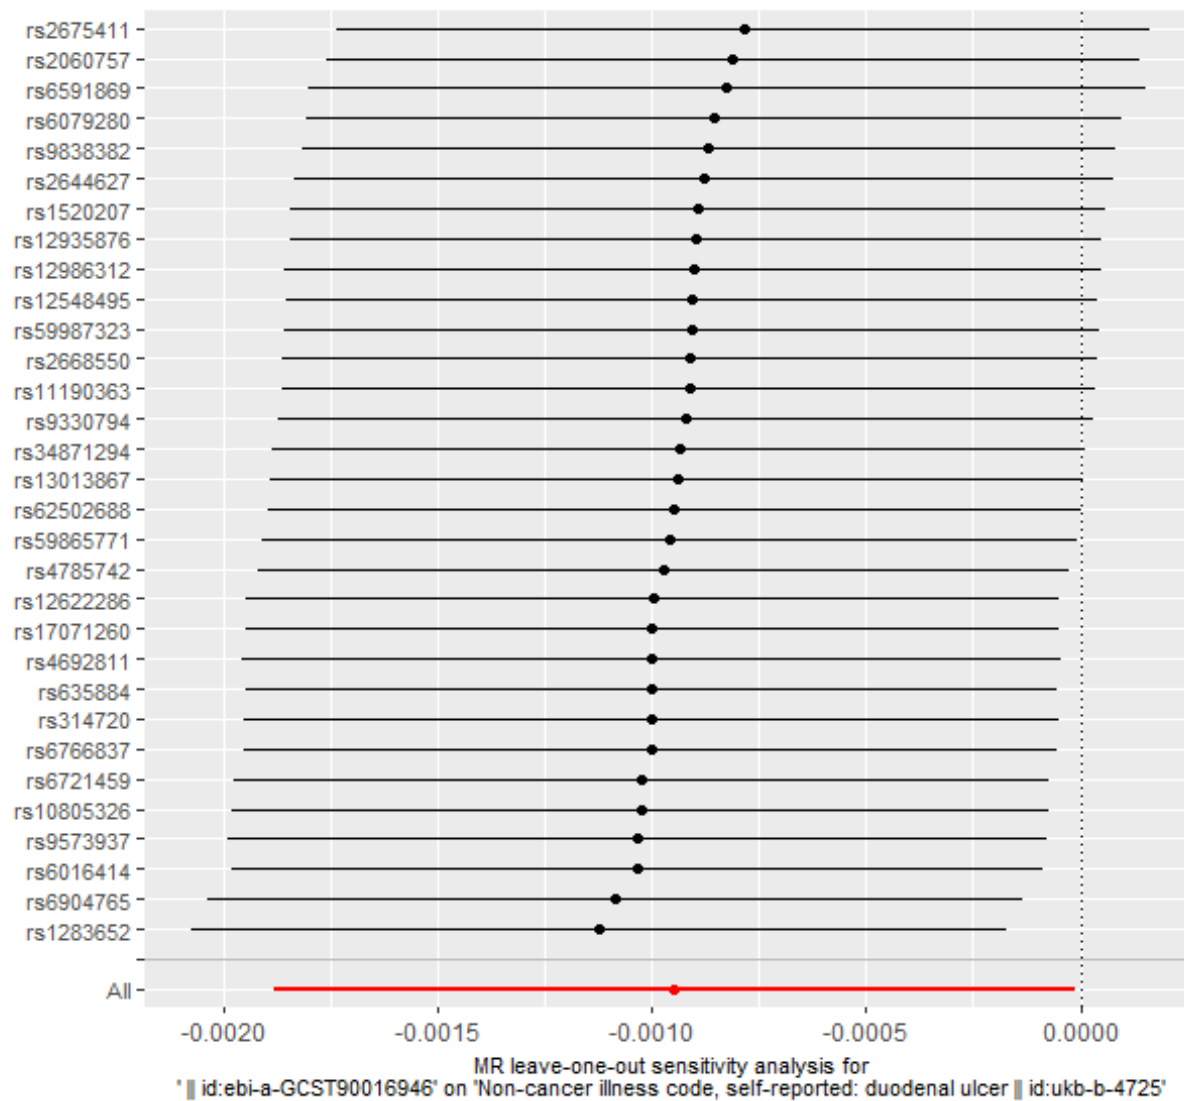

MR Method

- Inverse variance weighted
- MR Egger

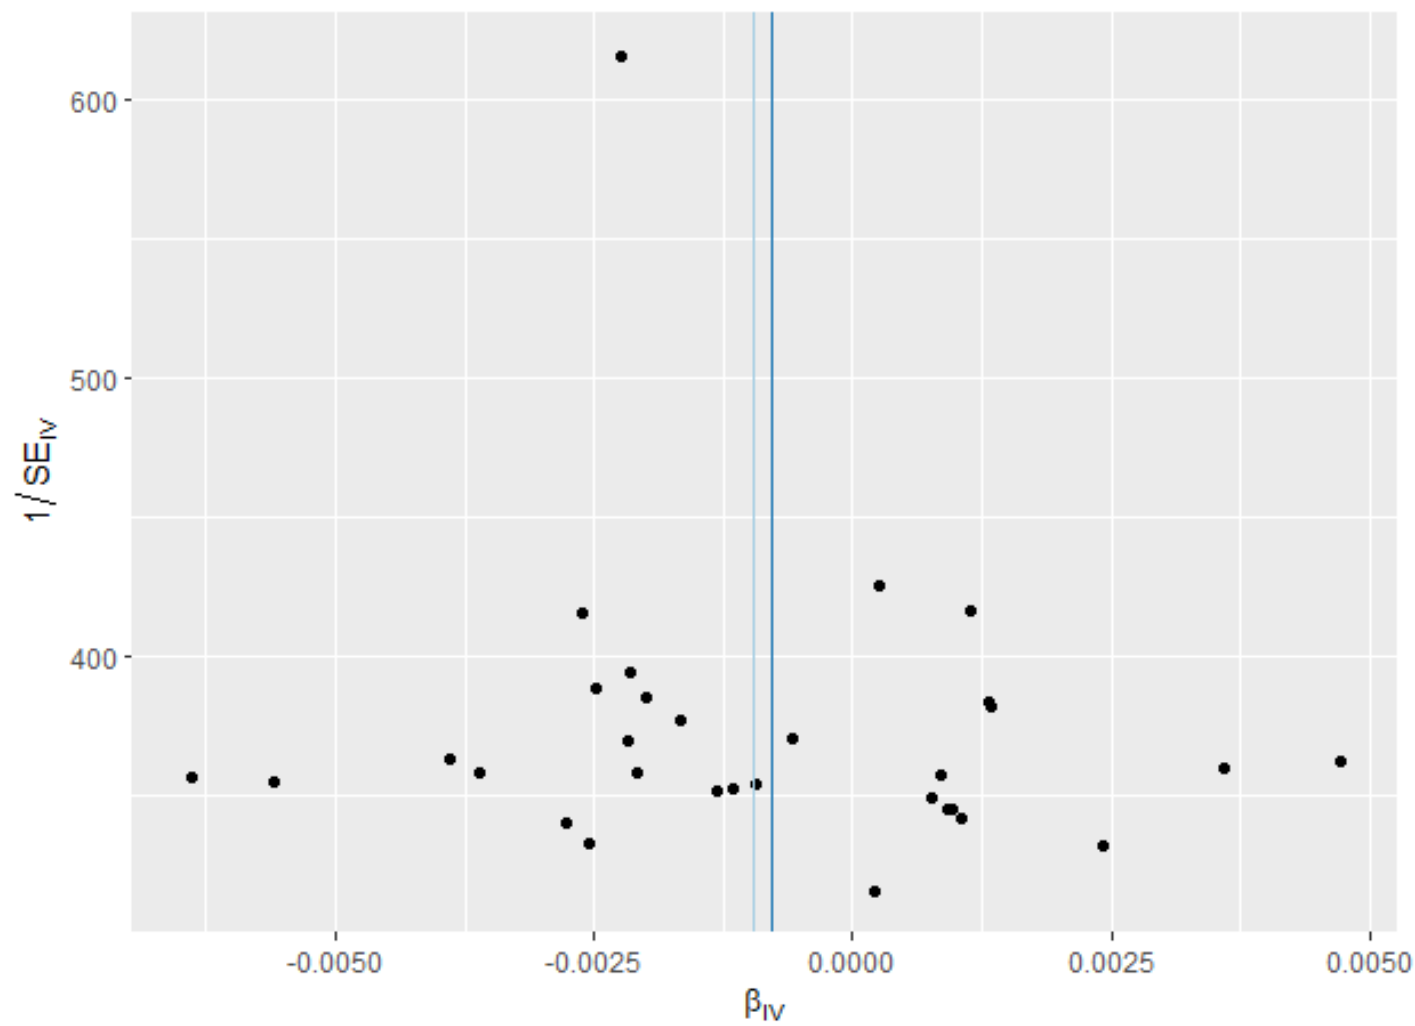

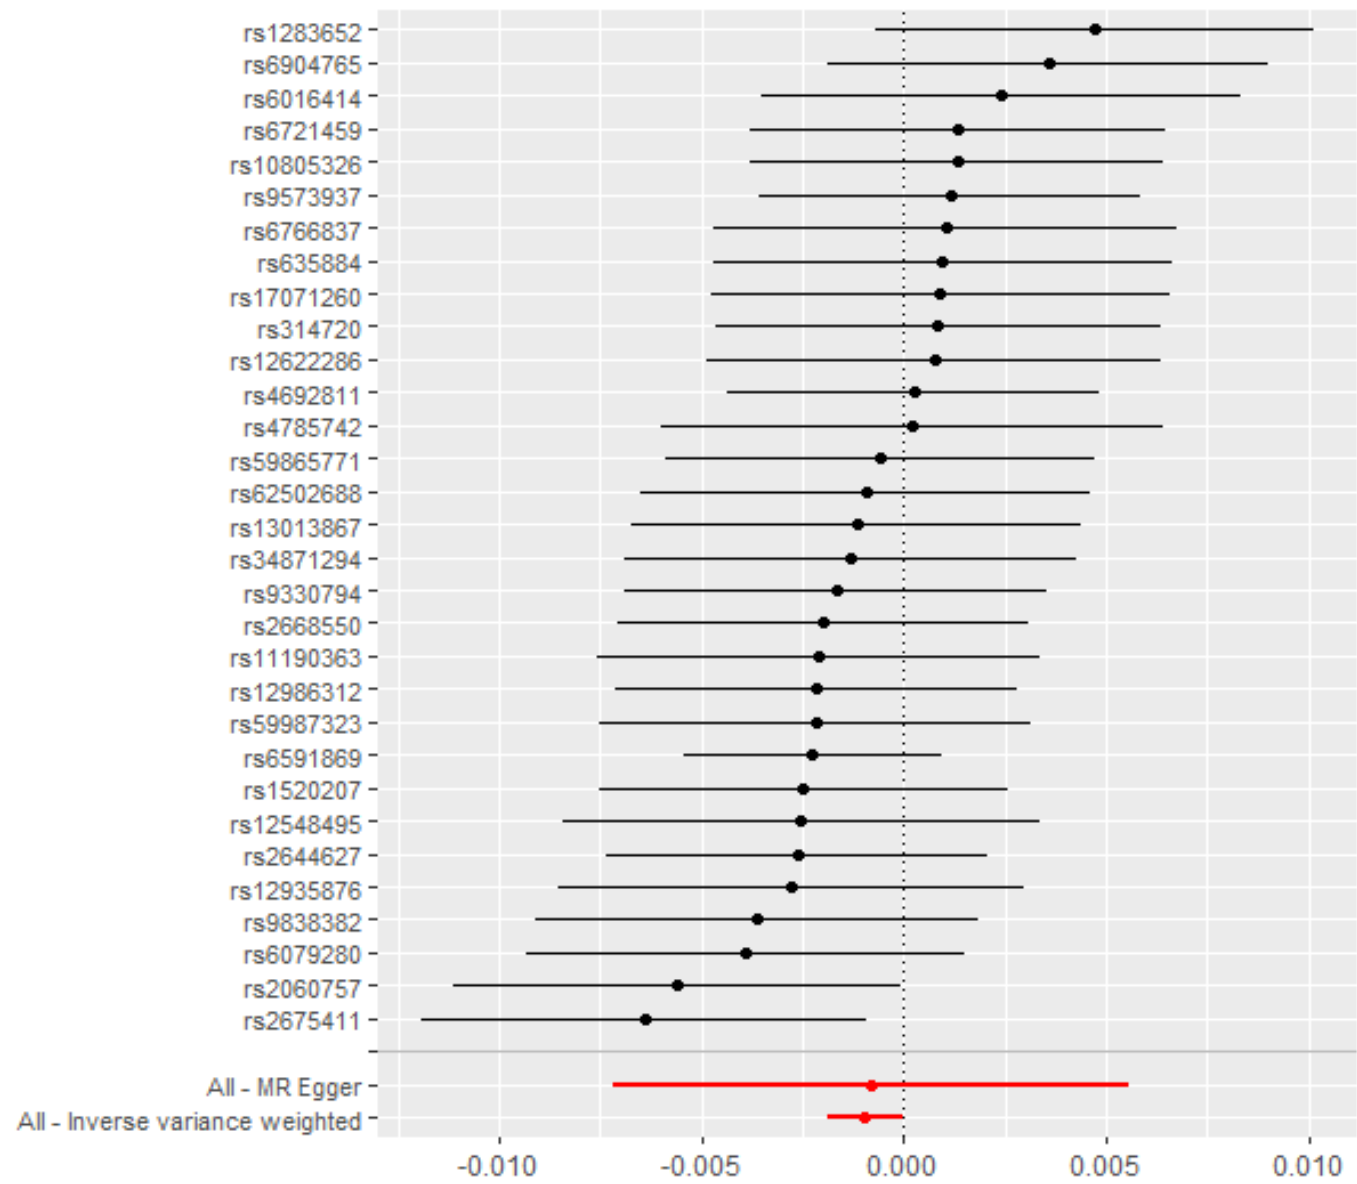

' || id:ebi-a-GCST90016946' on 'Non-cancer illness code, self-reported: duodenal ulcer' || id:ukb-b-4

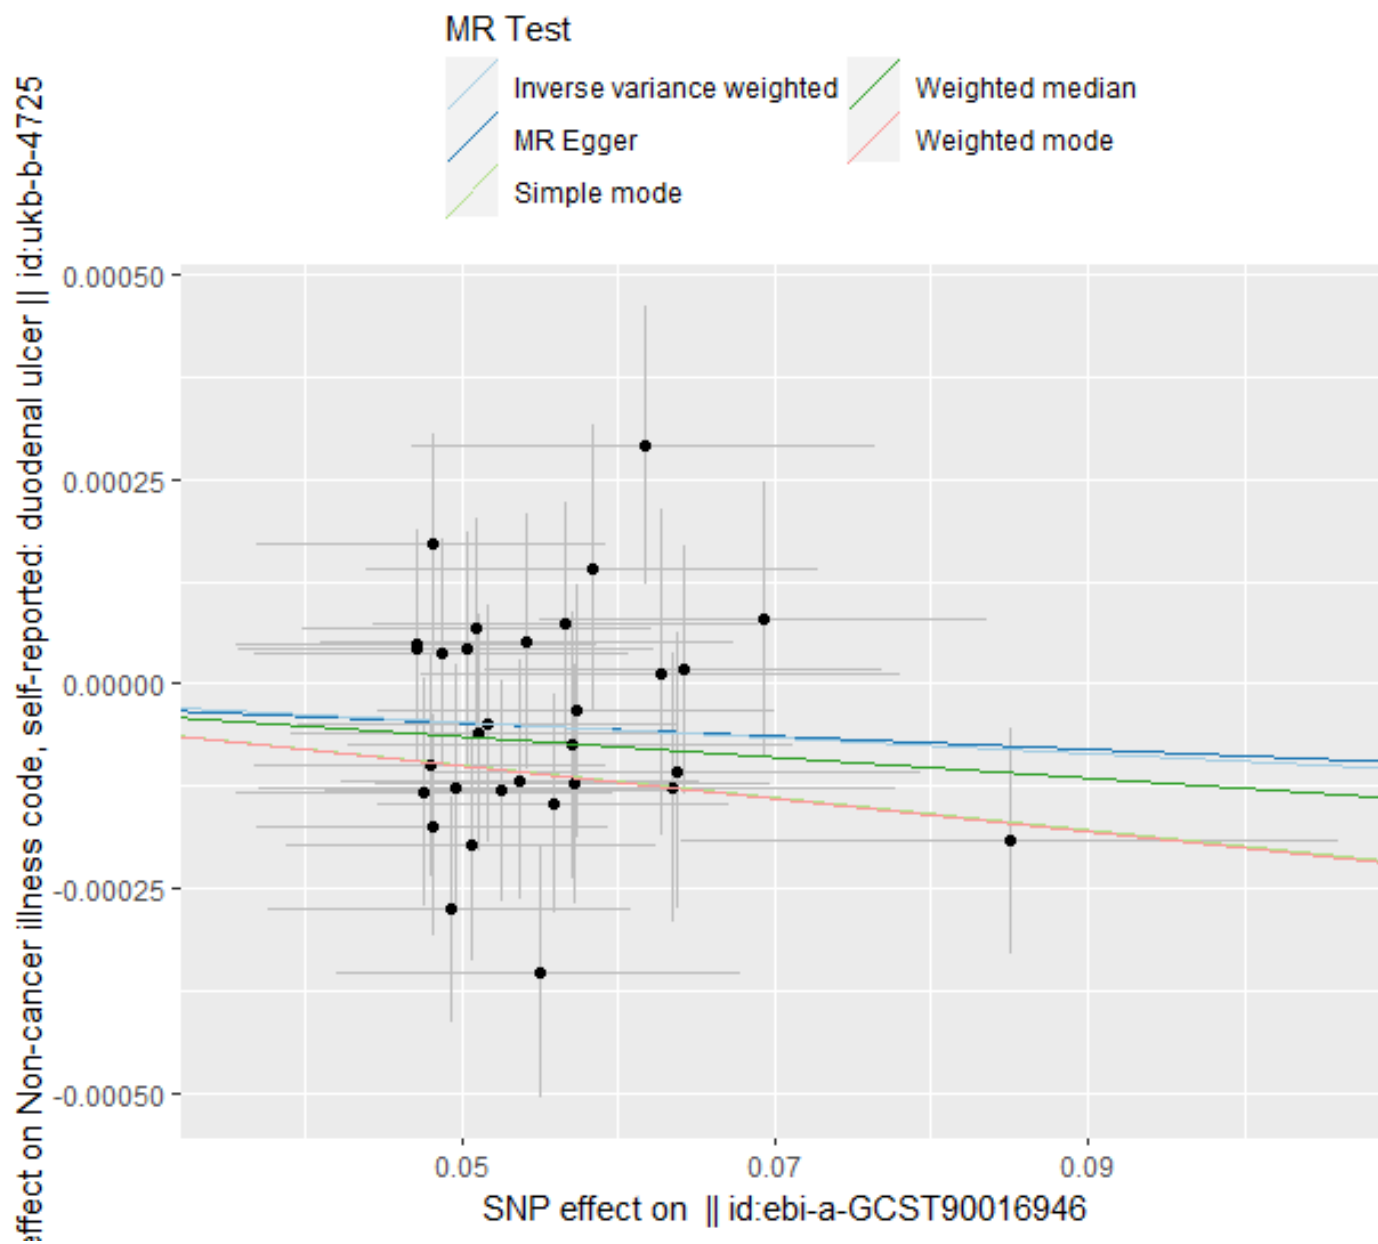

**Figure 56** Leave-one-out analysis, funnel plot, MR effect size and scatter plot for gut microbiota abundance (family Porphyromonadaceae id.943) on duodenal ulcer

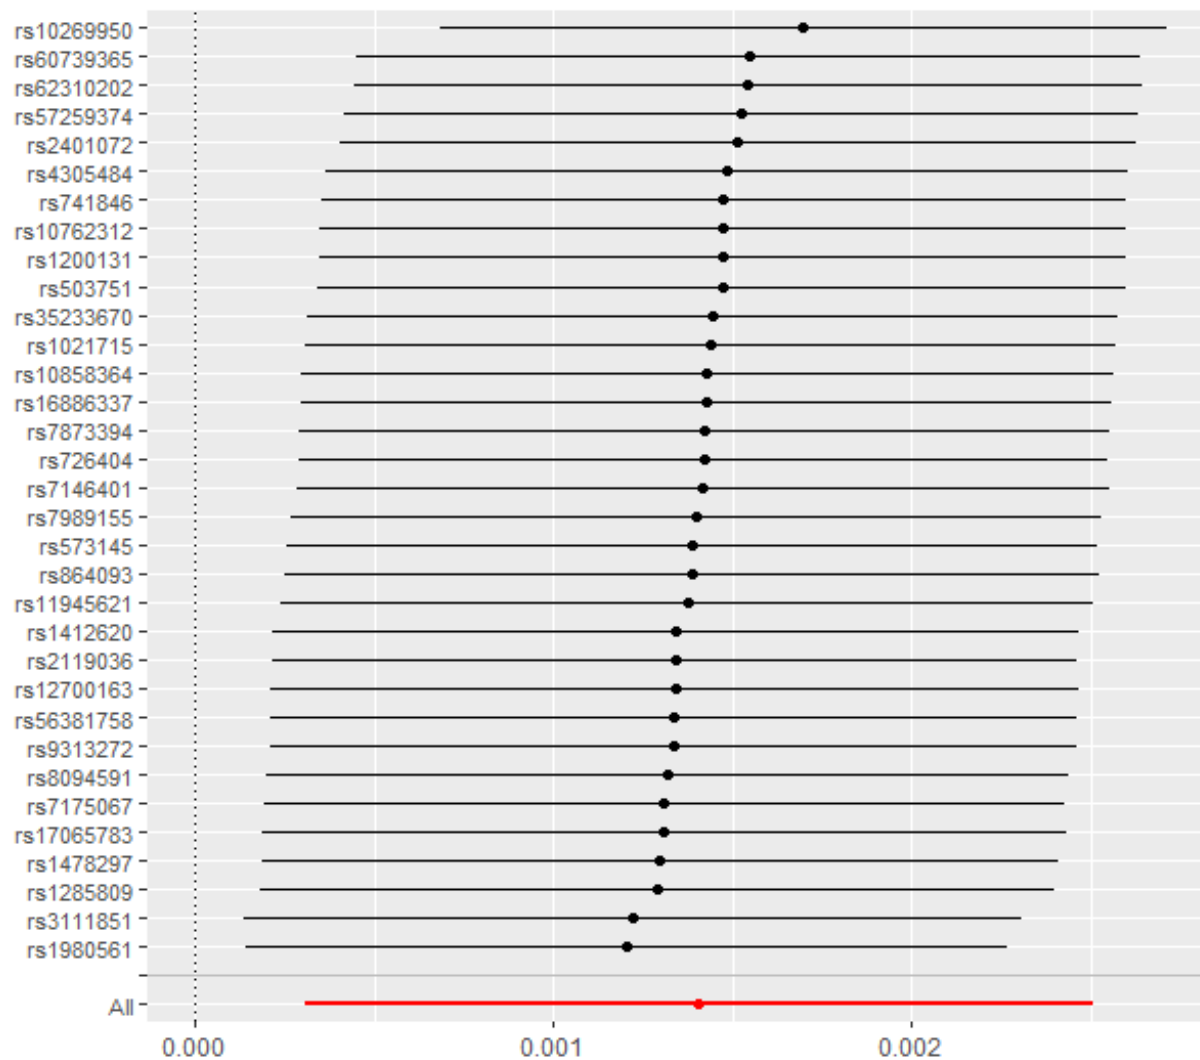

MR leave-one-out sensitivity analysis for  
' || id:ebi-a-GCST90016947' on 'Non-cancer illness code, self-reported: duodenal ulcer || id:ukb-b-4725'

MR Method

- Inverse variance weighted
- MR Egger

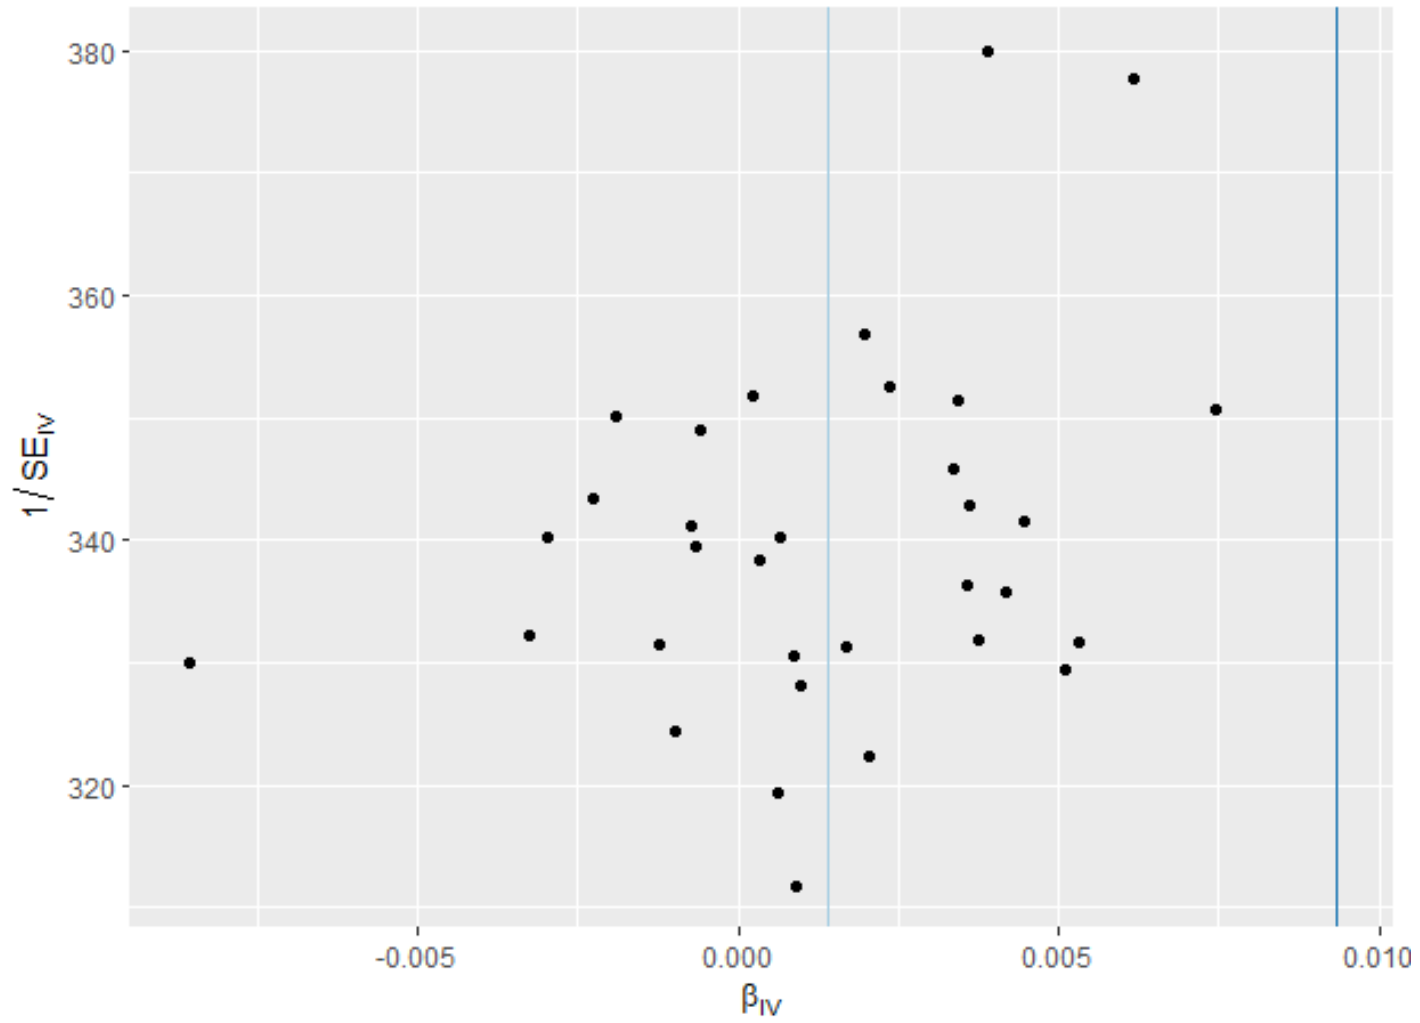

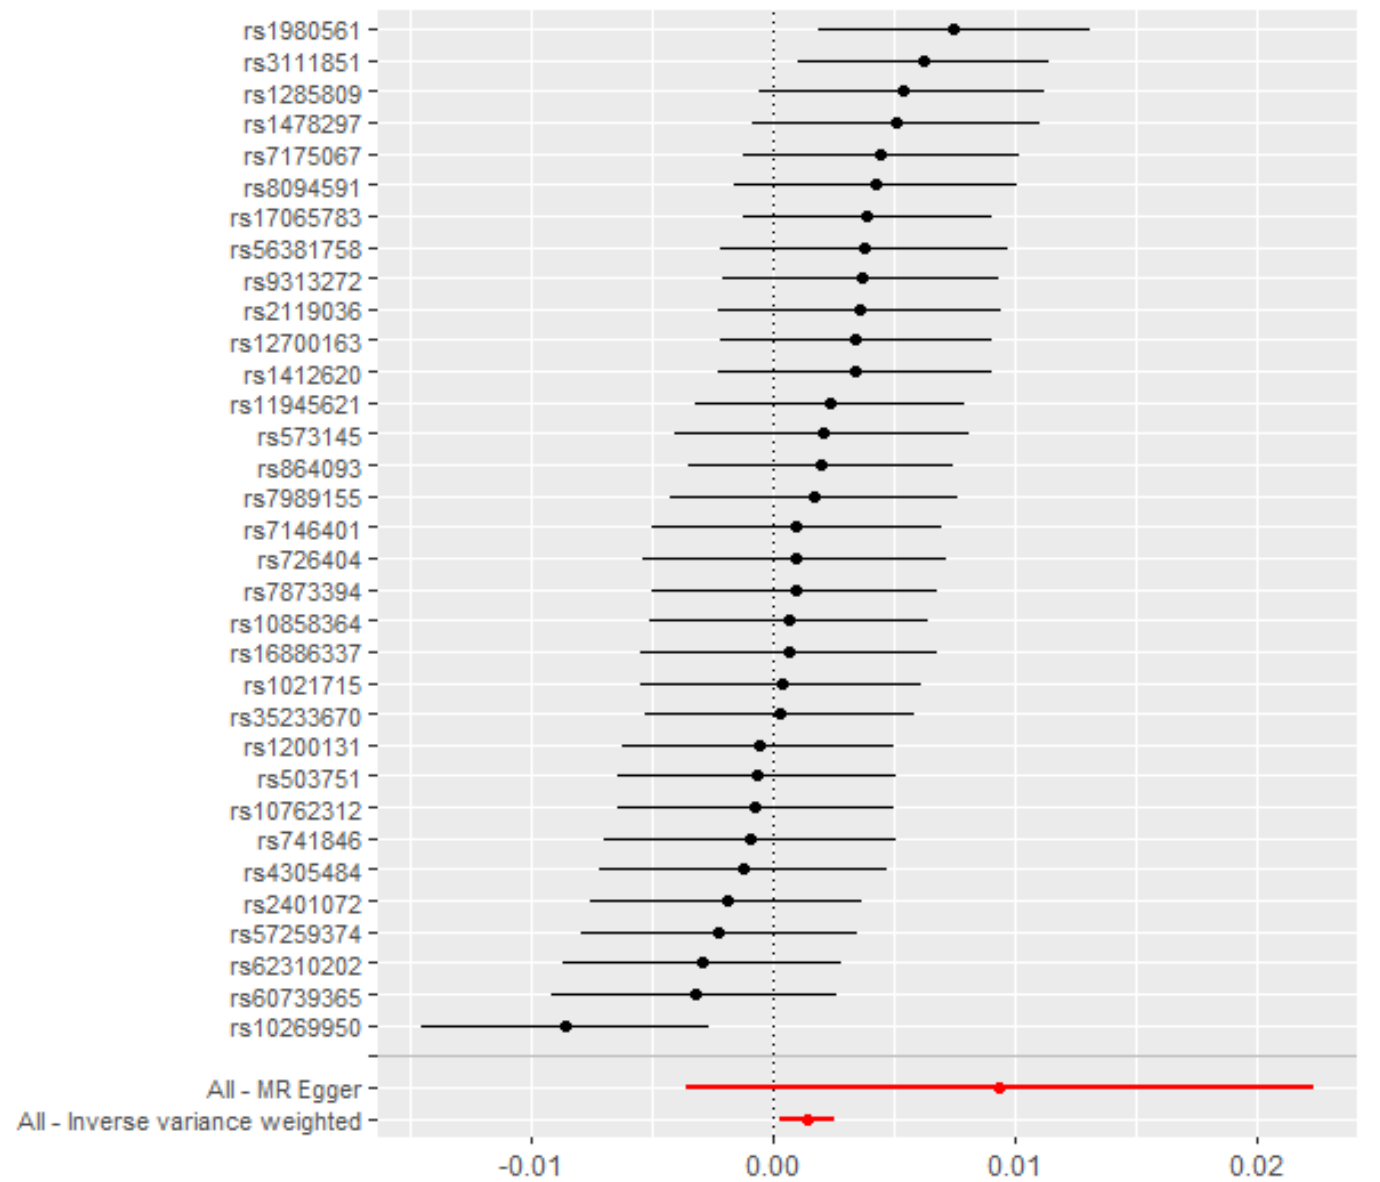

' || id:ebi-a-GCST90016947' on 'Non-cancer illness code, self-reported: duodenal ulcer' || id:ukb-b-4

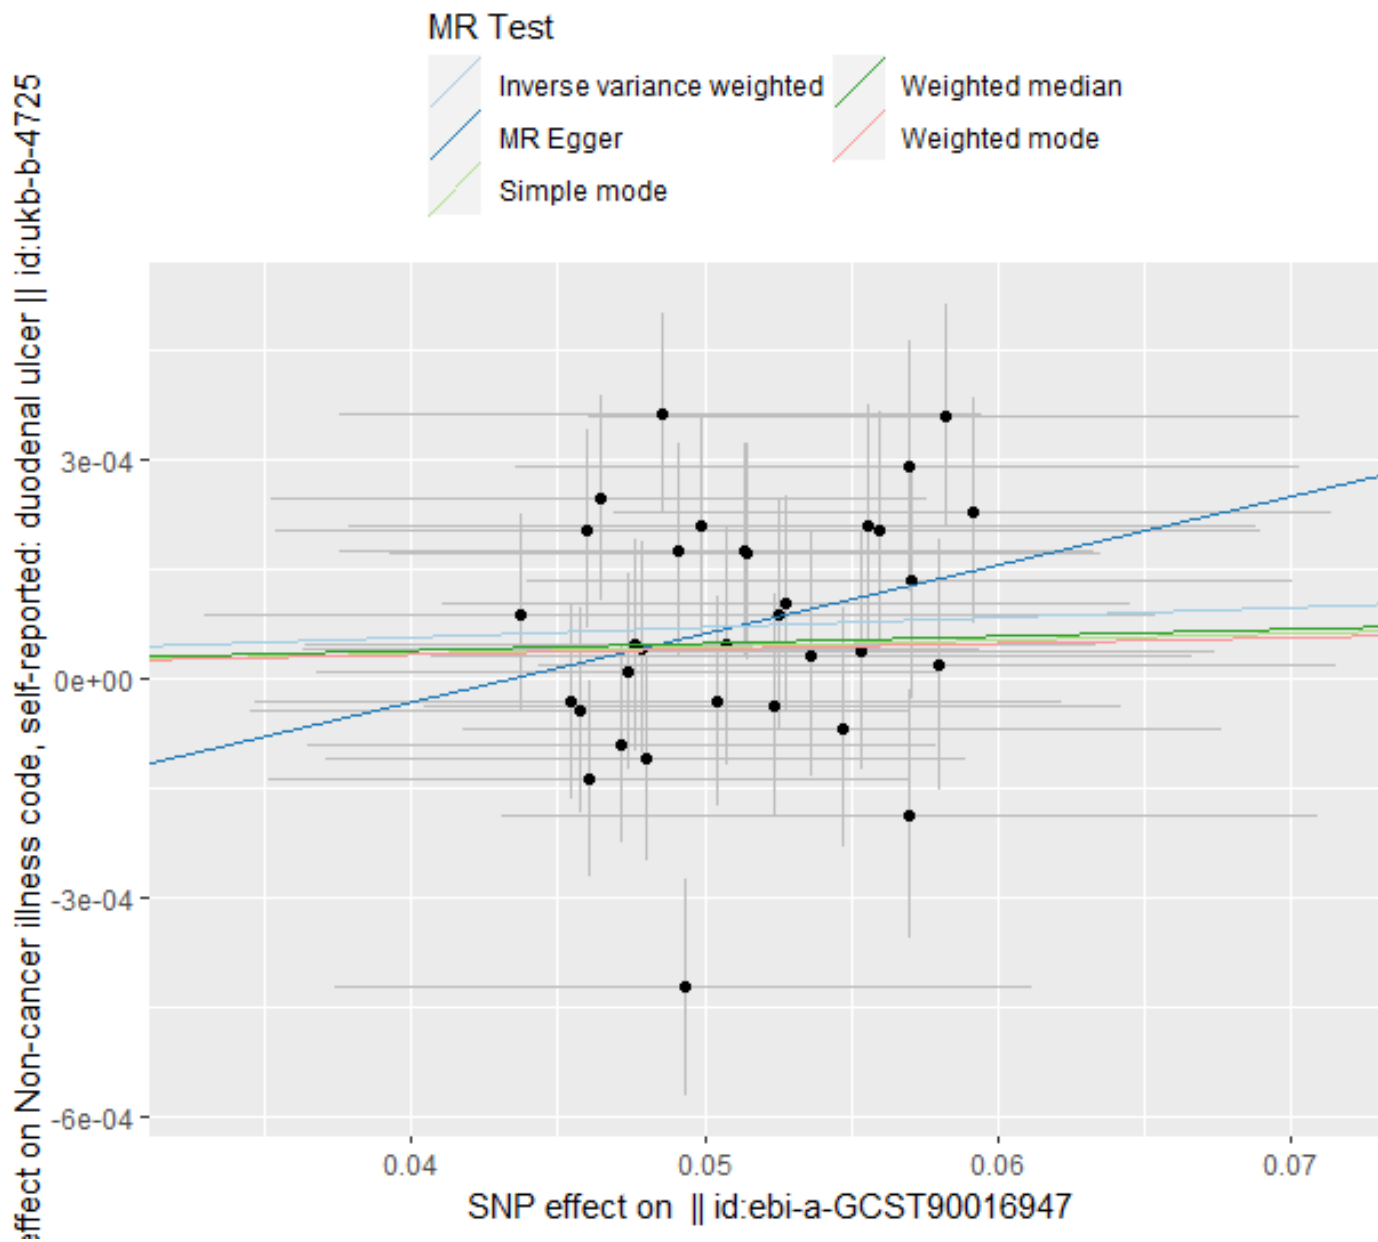



**Figure 57** Leave-one-out analysis, funnel plot, MR effect size and scatter plot for gut microbiota abundance (family Verrucomicrobiaceae id.4036) on duodenal ulcer

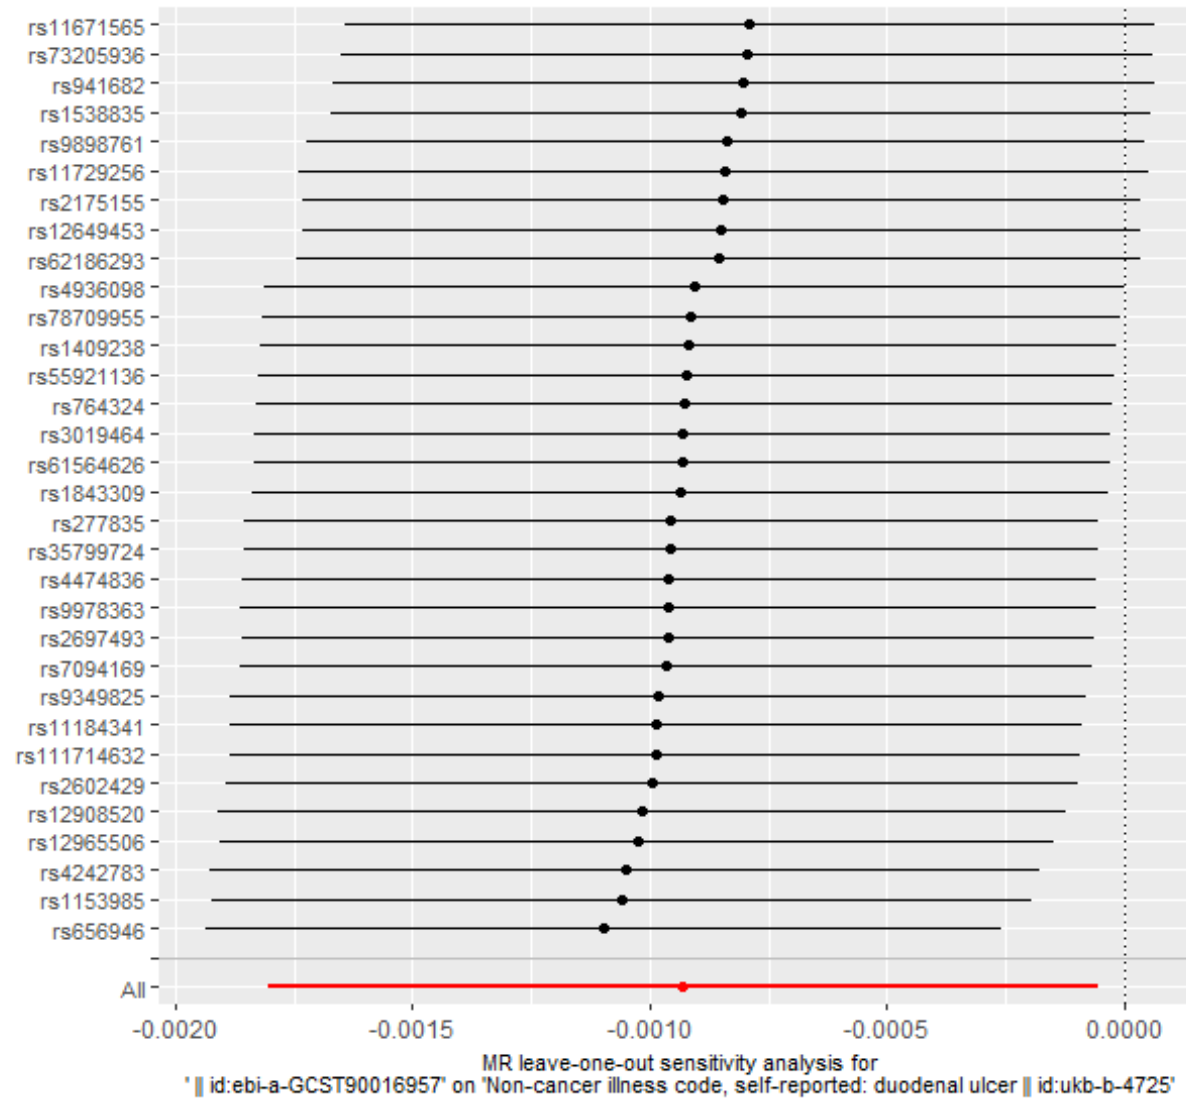

MR Method

- Inverse variance weighted
- MR Egger

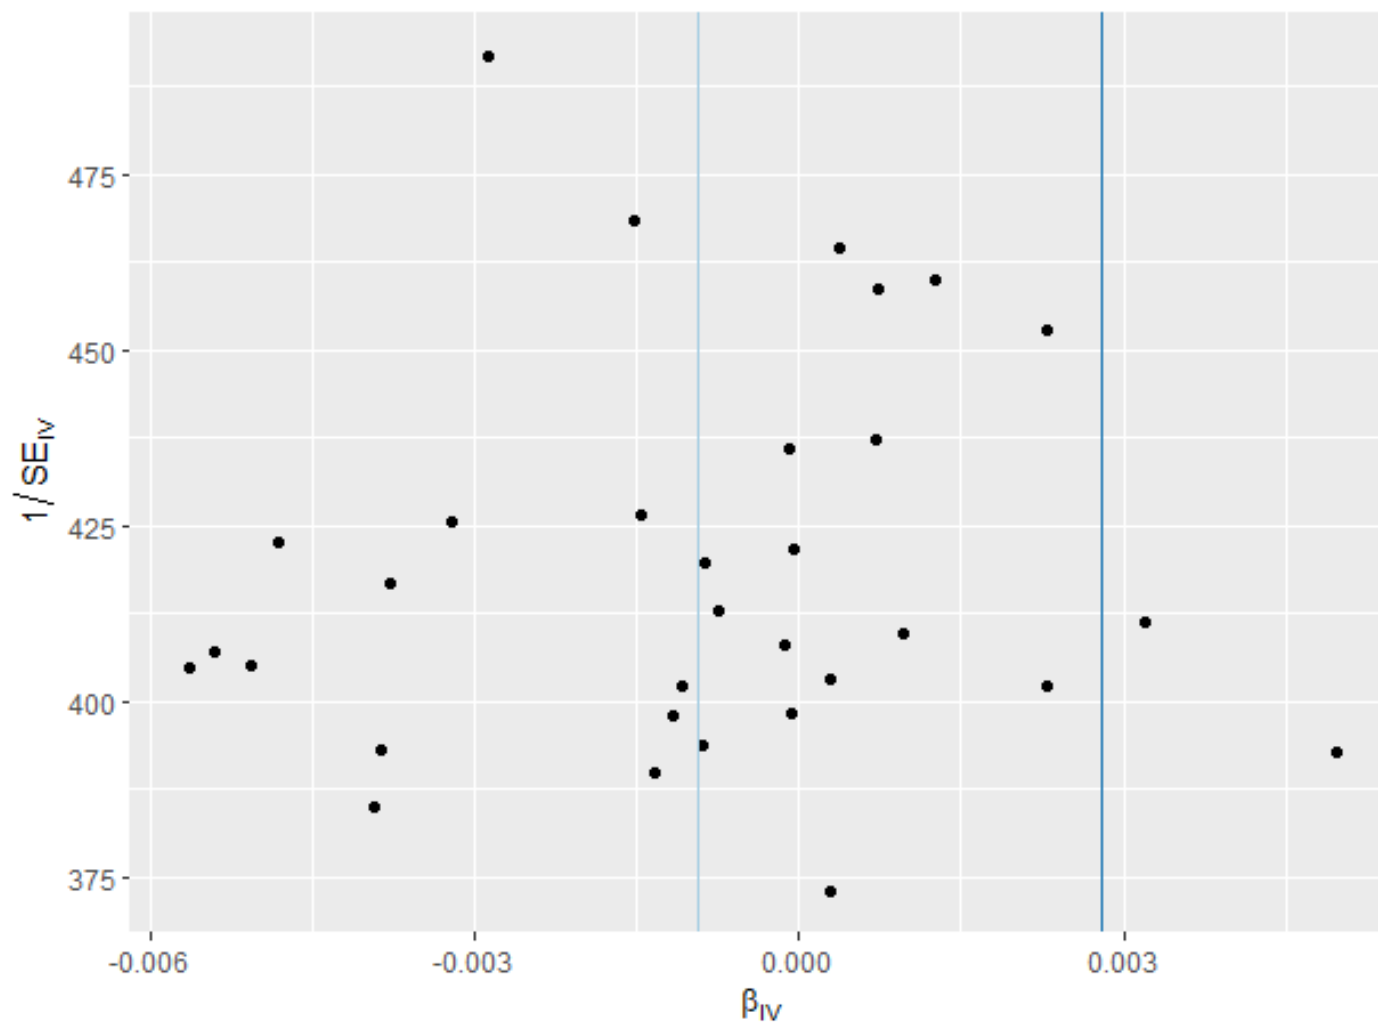

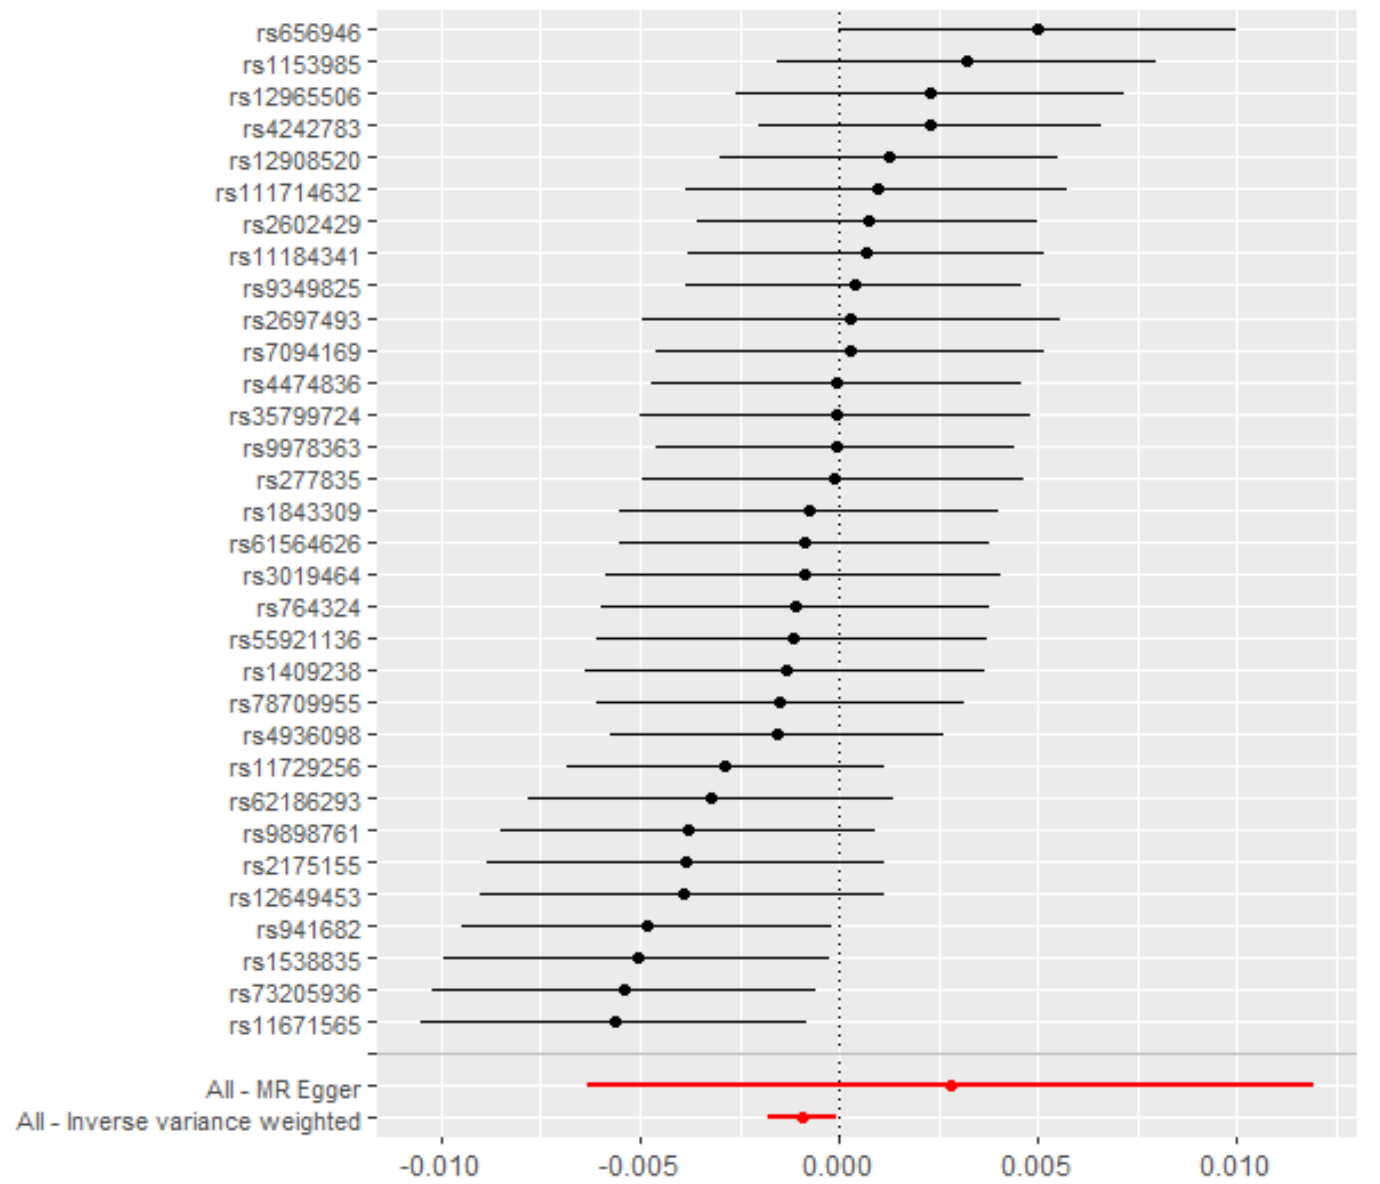

' || id:ebi-a-GCST90016957' on 'Non-cancer illness code, self-reported: duodenal ulcer' || id:ukb-b-4

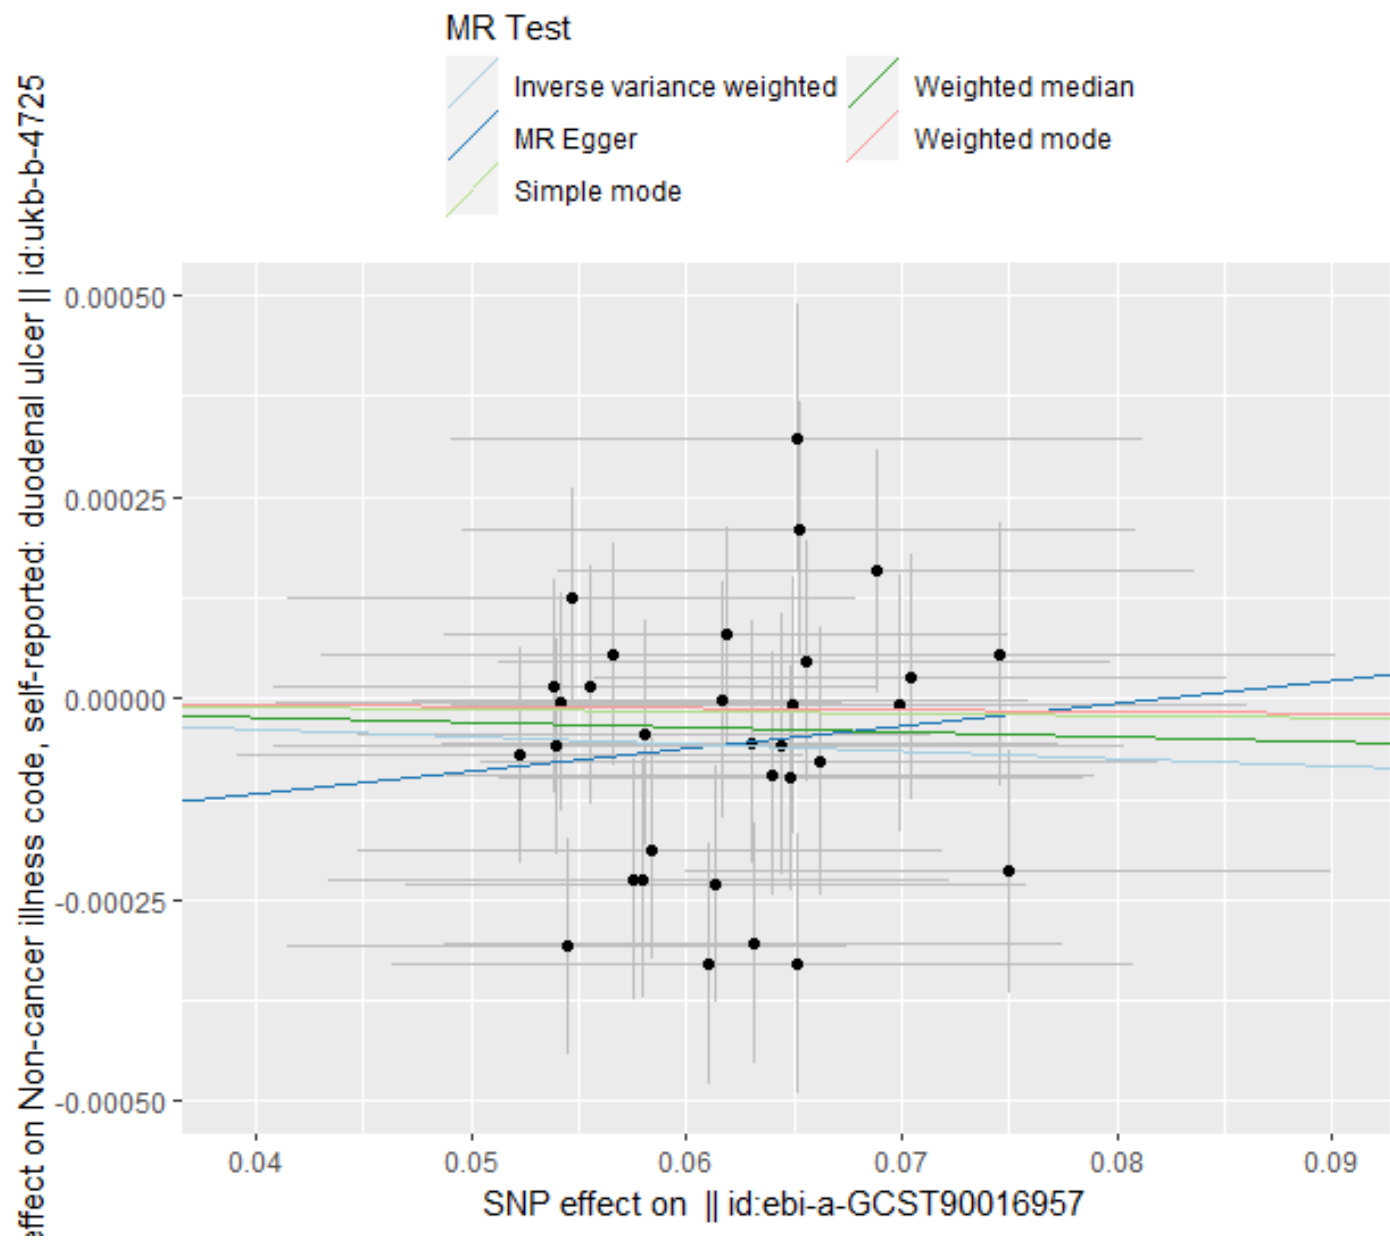

**Figure 58** Leave-one-out analysis, funnel plot, MR effect size and scatter plot for gut microbiota abundance (genus Bacteroides id.918) on duodenal ulcer

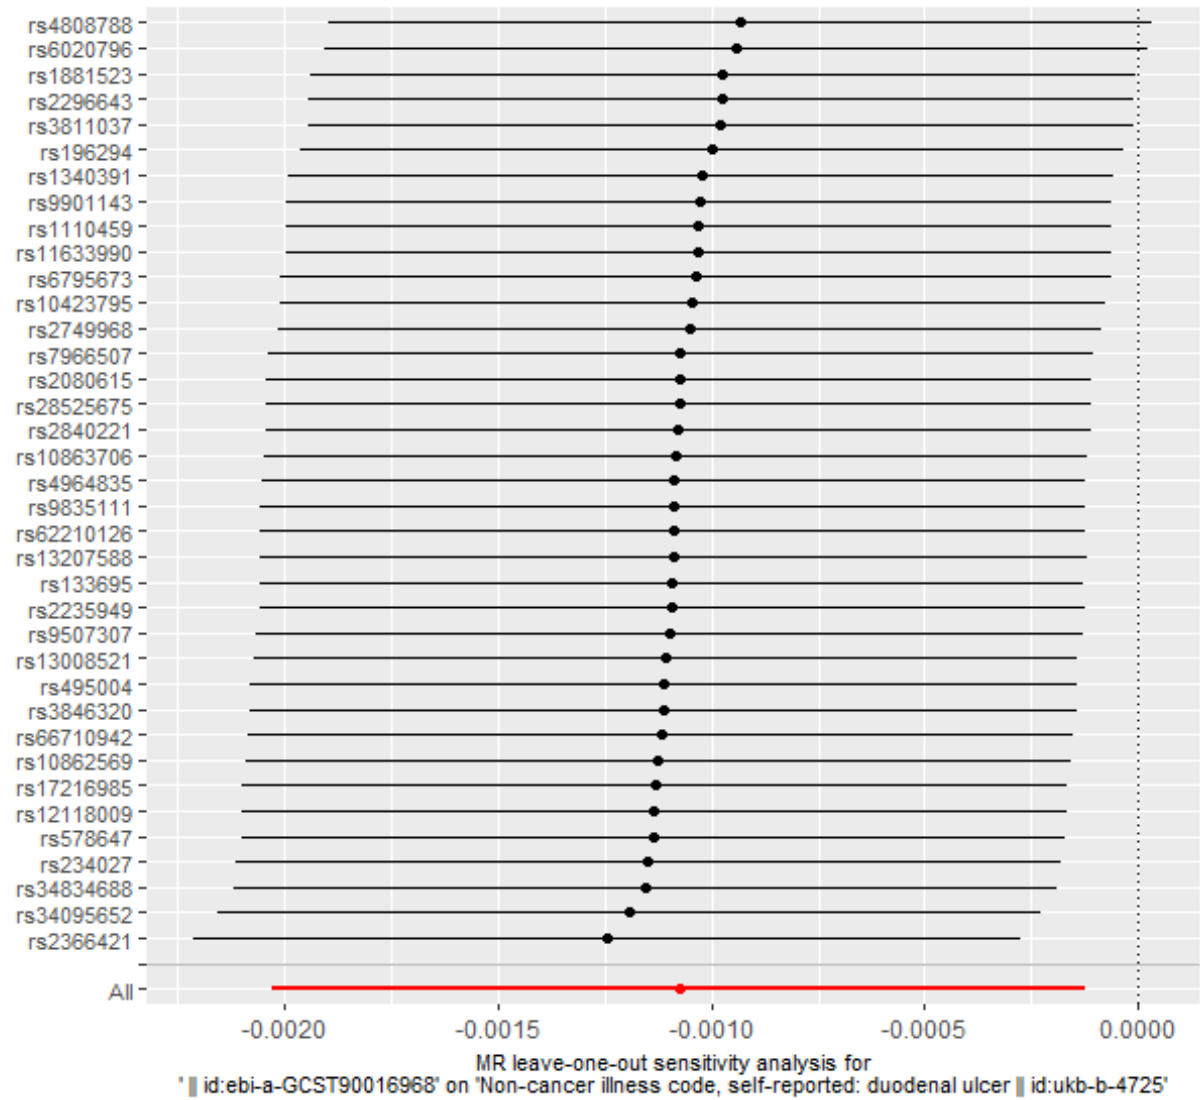

MR Method

- Inverse variance weighted
- MR Egger

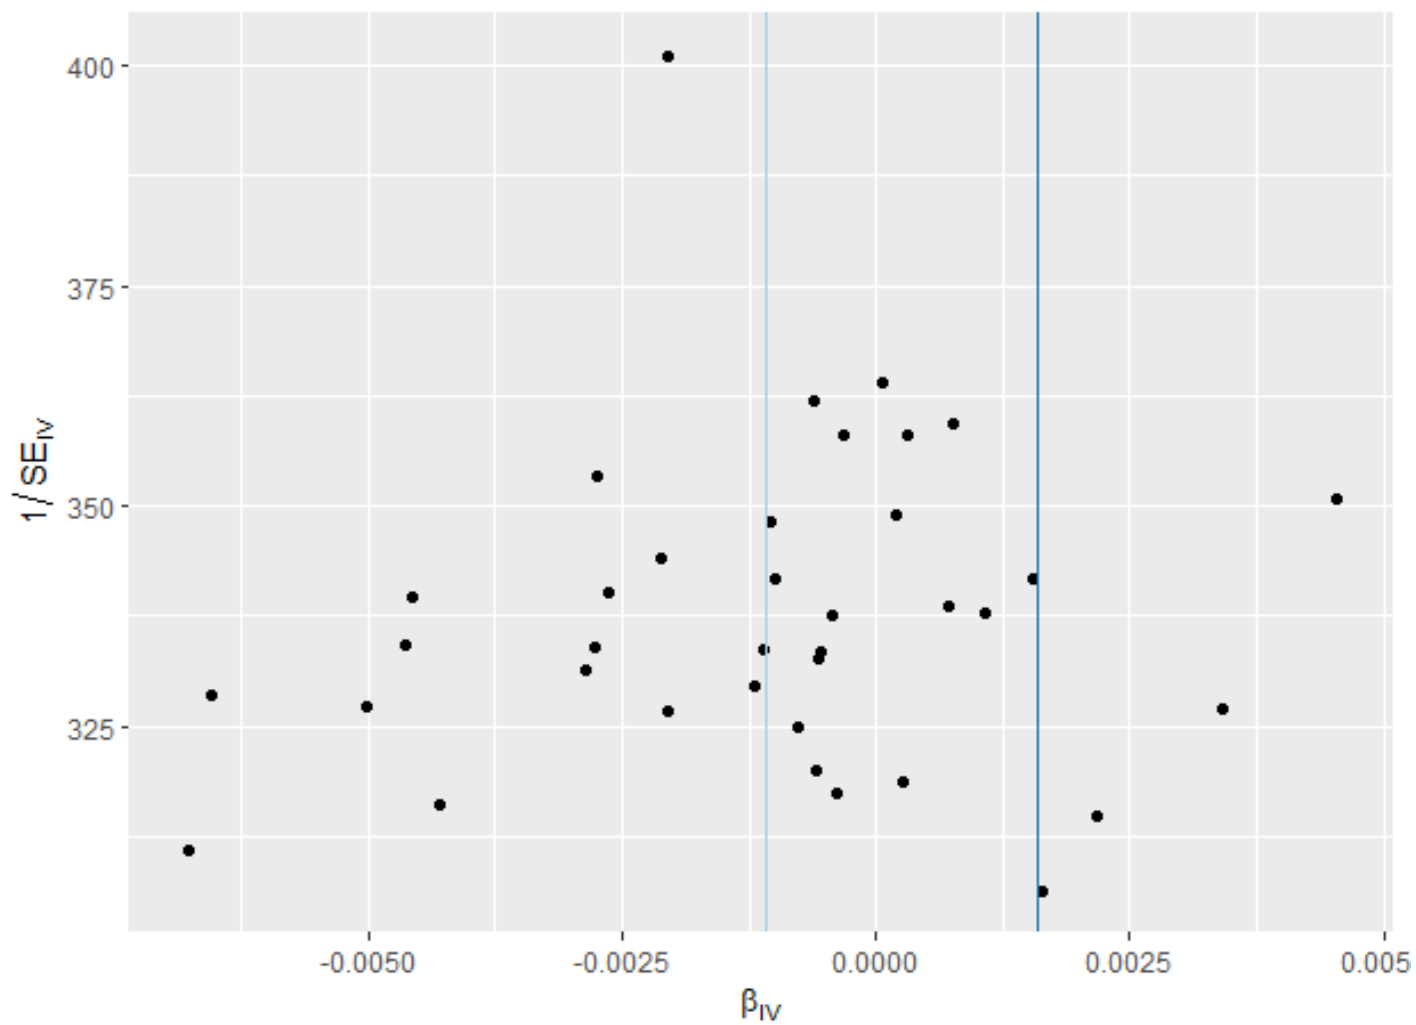

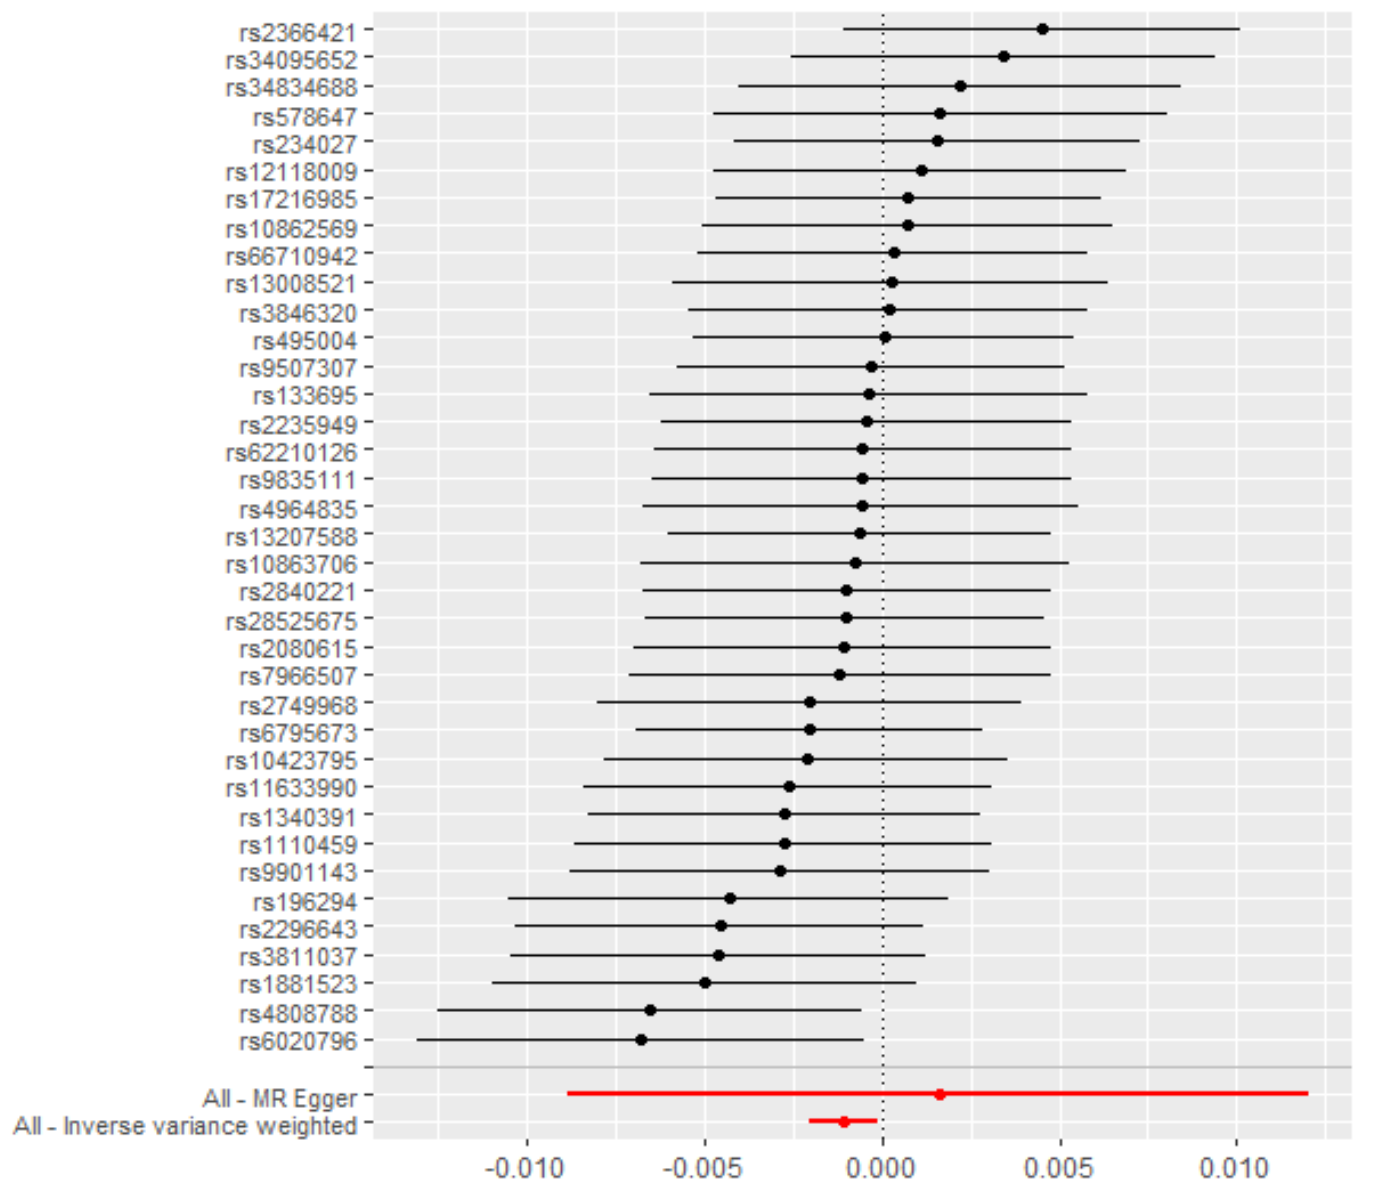

' || id:ebi-a-GCST90016968' on 'Non-cancer illness code, self-reported: duodenal ulcer' || id:ukb-b-4

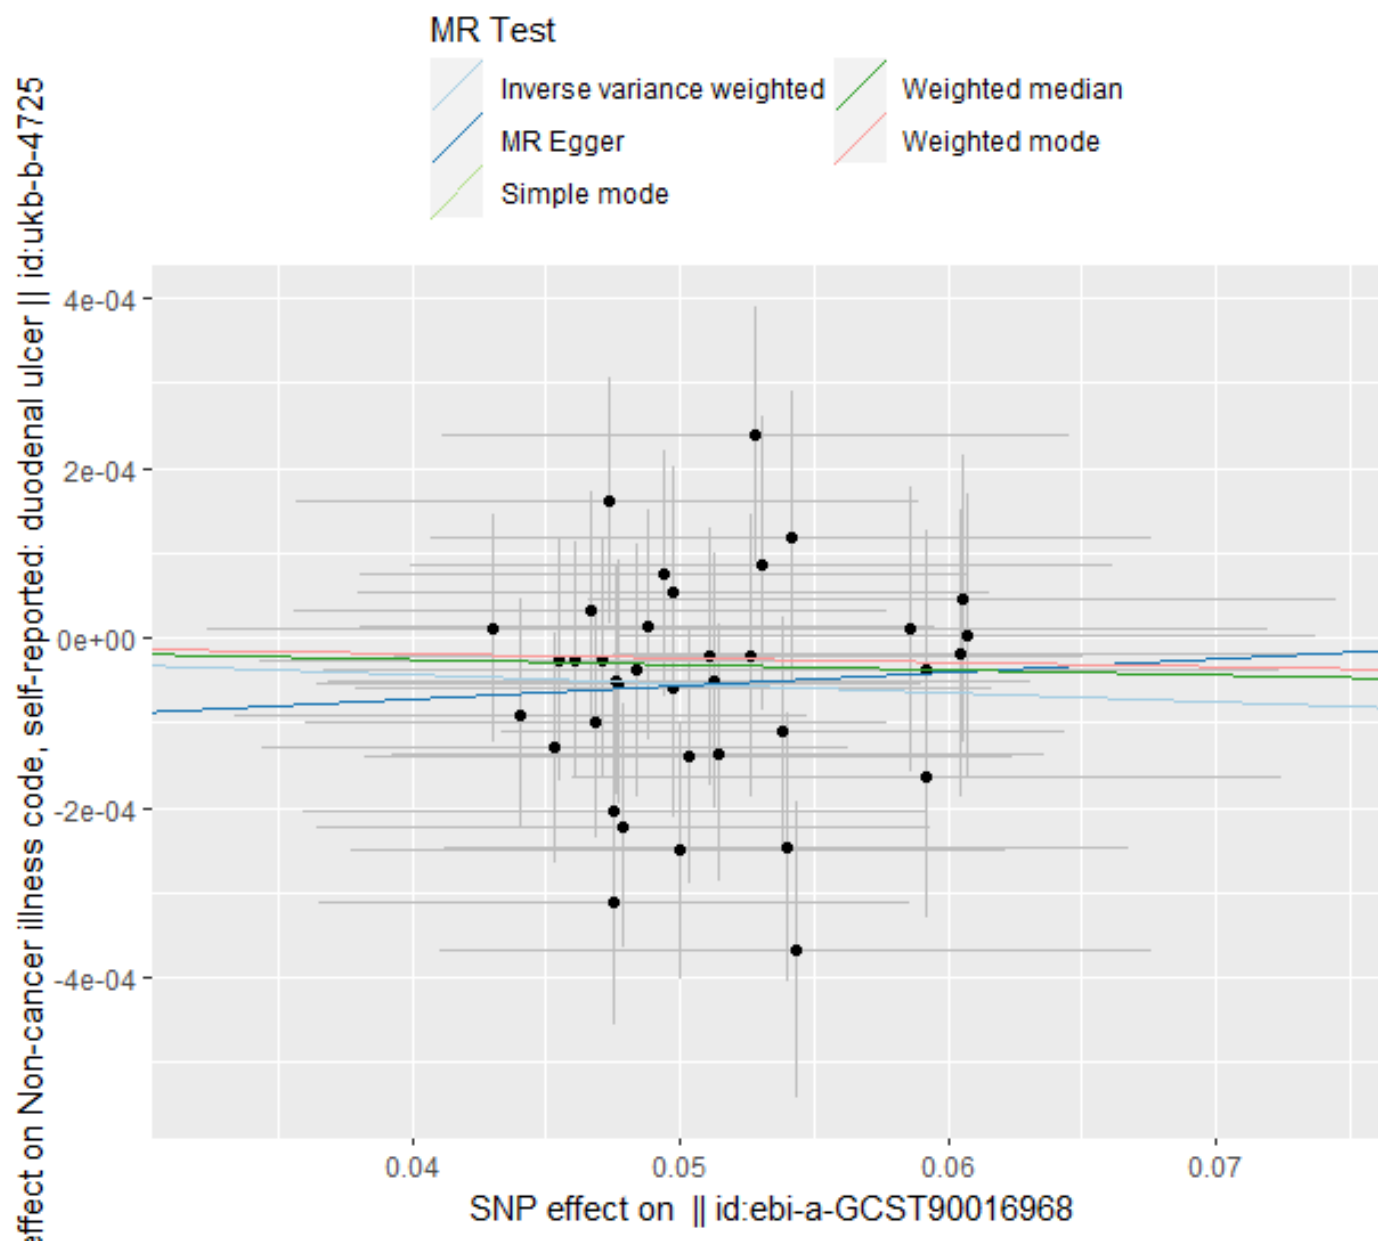



**Figure 59** Leave-one-out analysis, funnel plot, MR effect size and scatter plot for gut microbiota abundance (genus Family XIII UCG001 id.11294) on duodenal ulcer

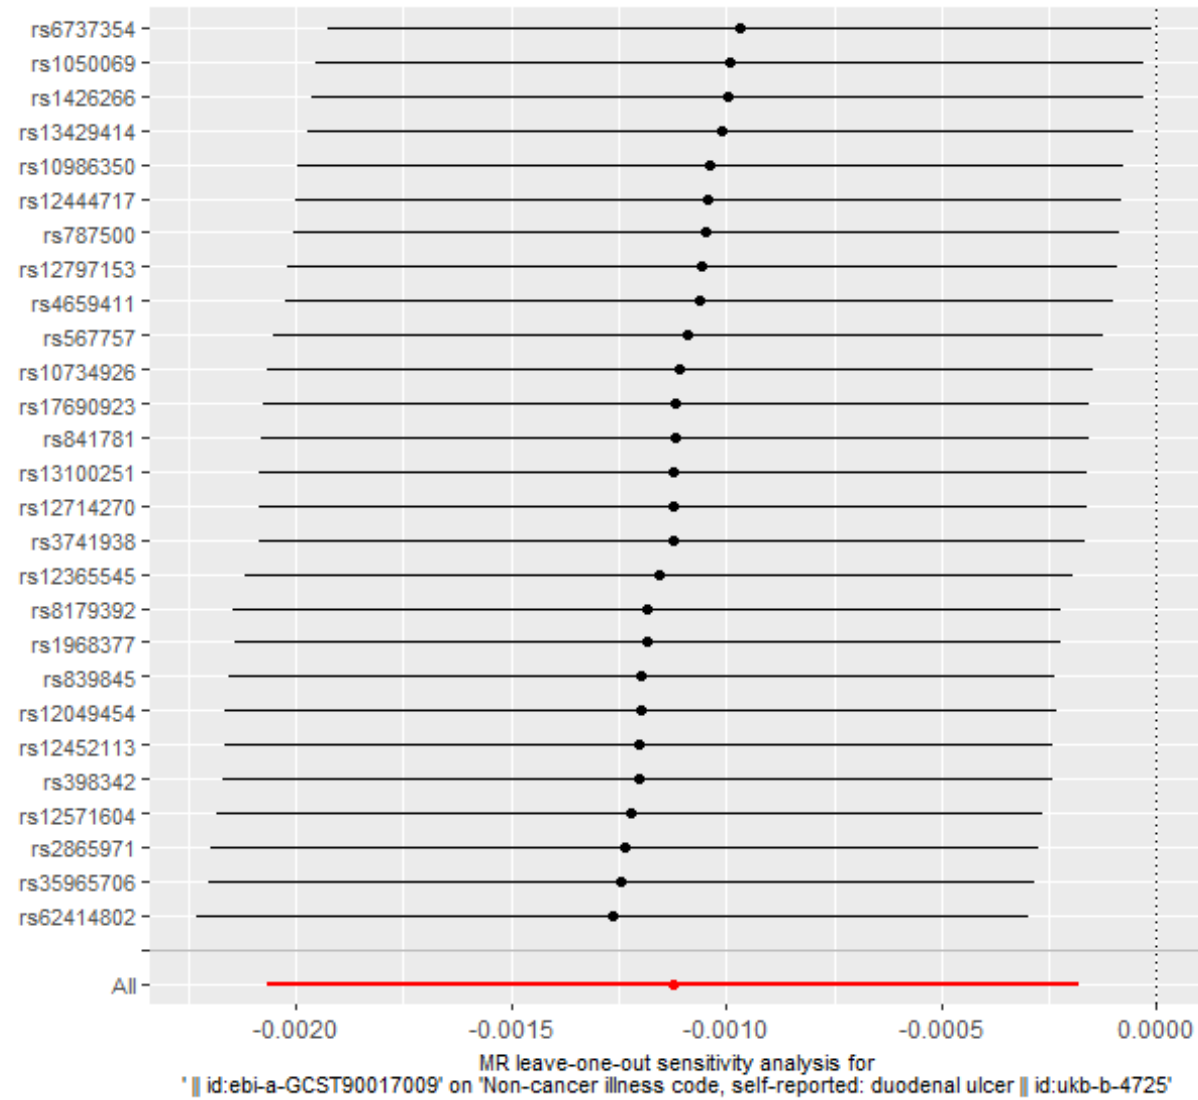

MR Method

- Inverse variance weighted
- MR Egger

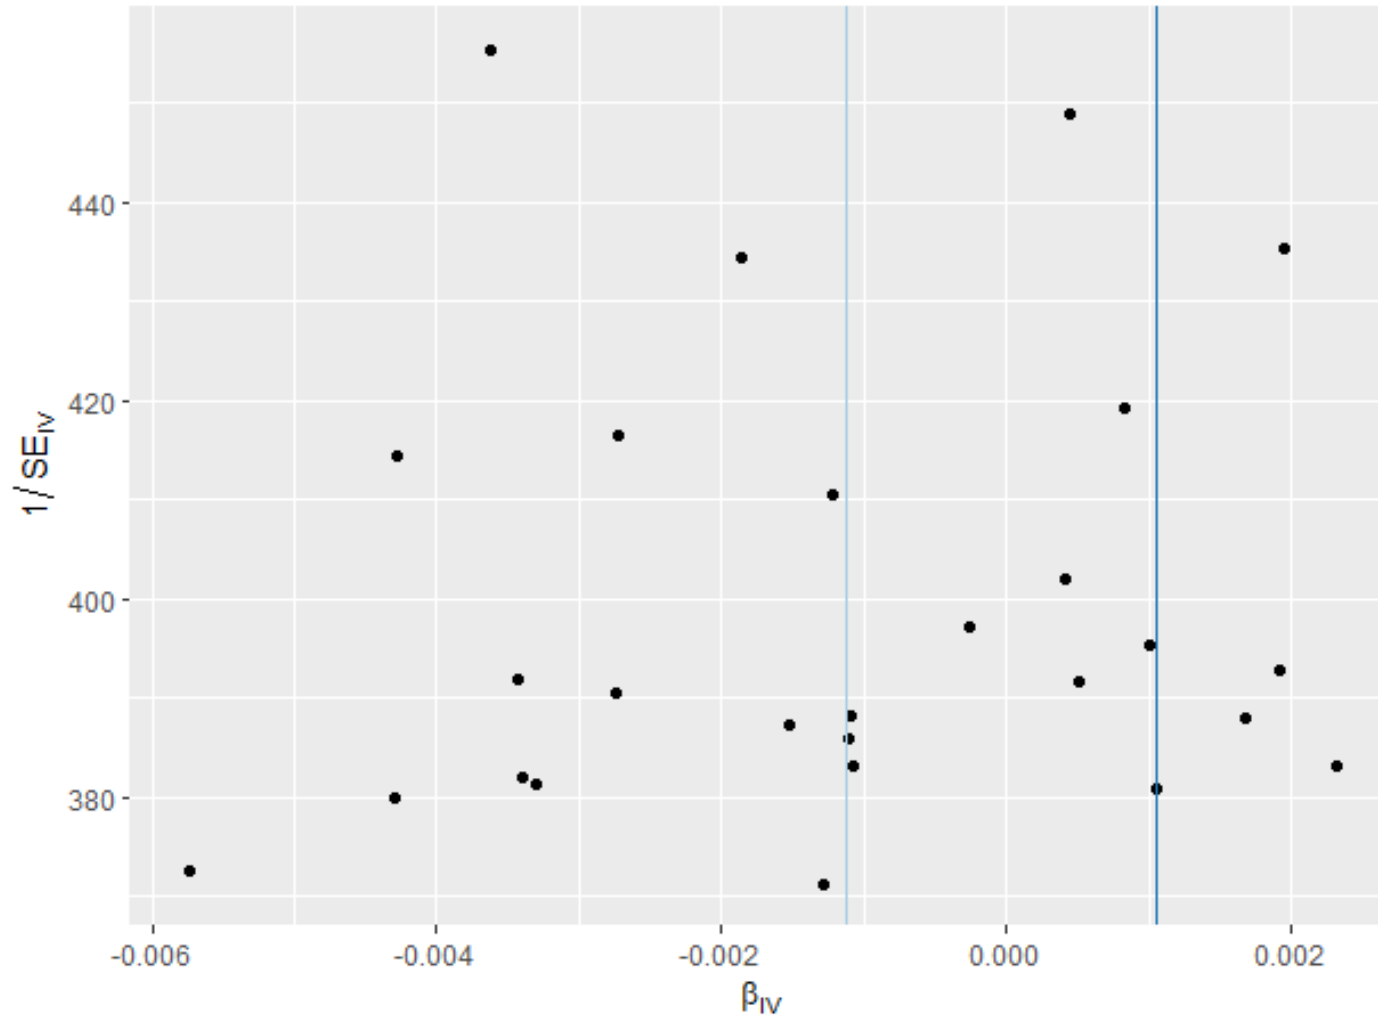

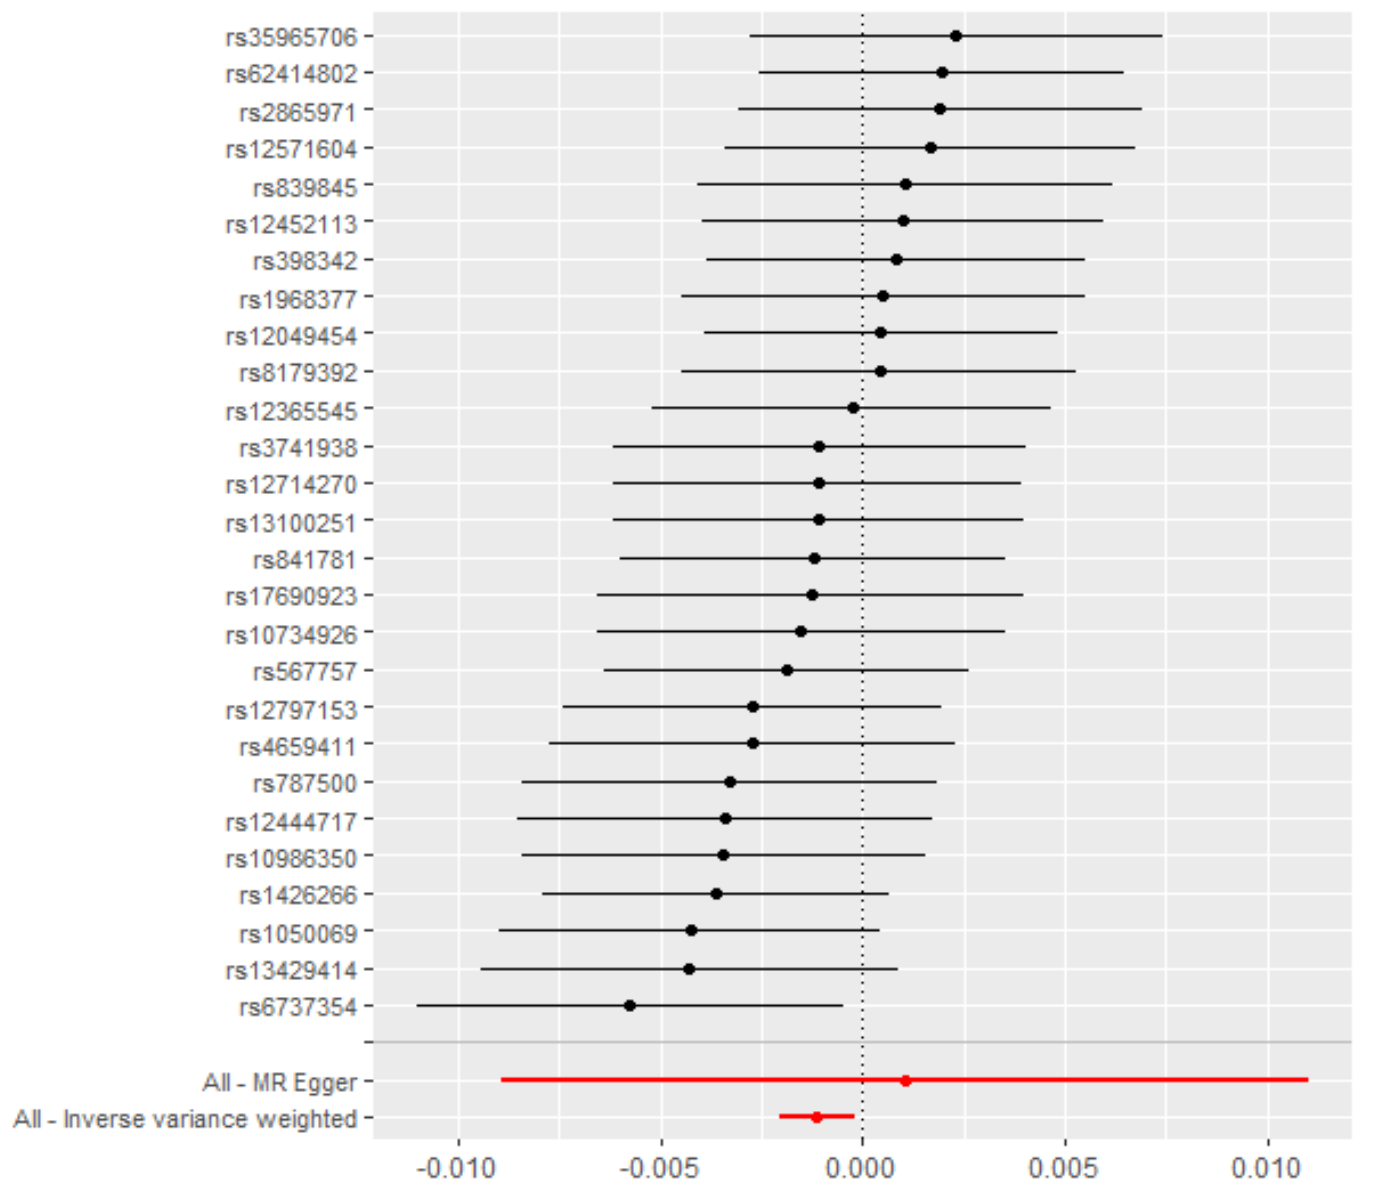

' || id:ebi-a-GCST90017009' on 'Non-cancer illness code, self-reported: duodenal ulcer' || id:ukb-b-4

effect on Non-cancer illness code, self-reported: duodenal ulcer || id:ukb-b-4725

### MR Test

- Inverse variance weighted
- MR Egger
- Simple mode
- Weighted median
- Weighted mode

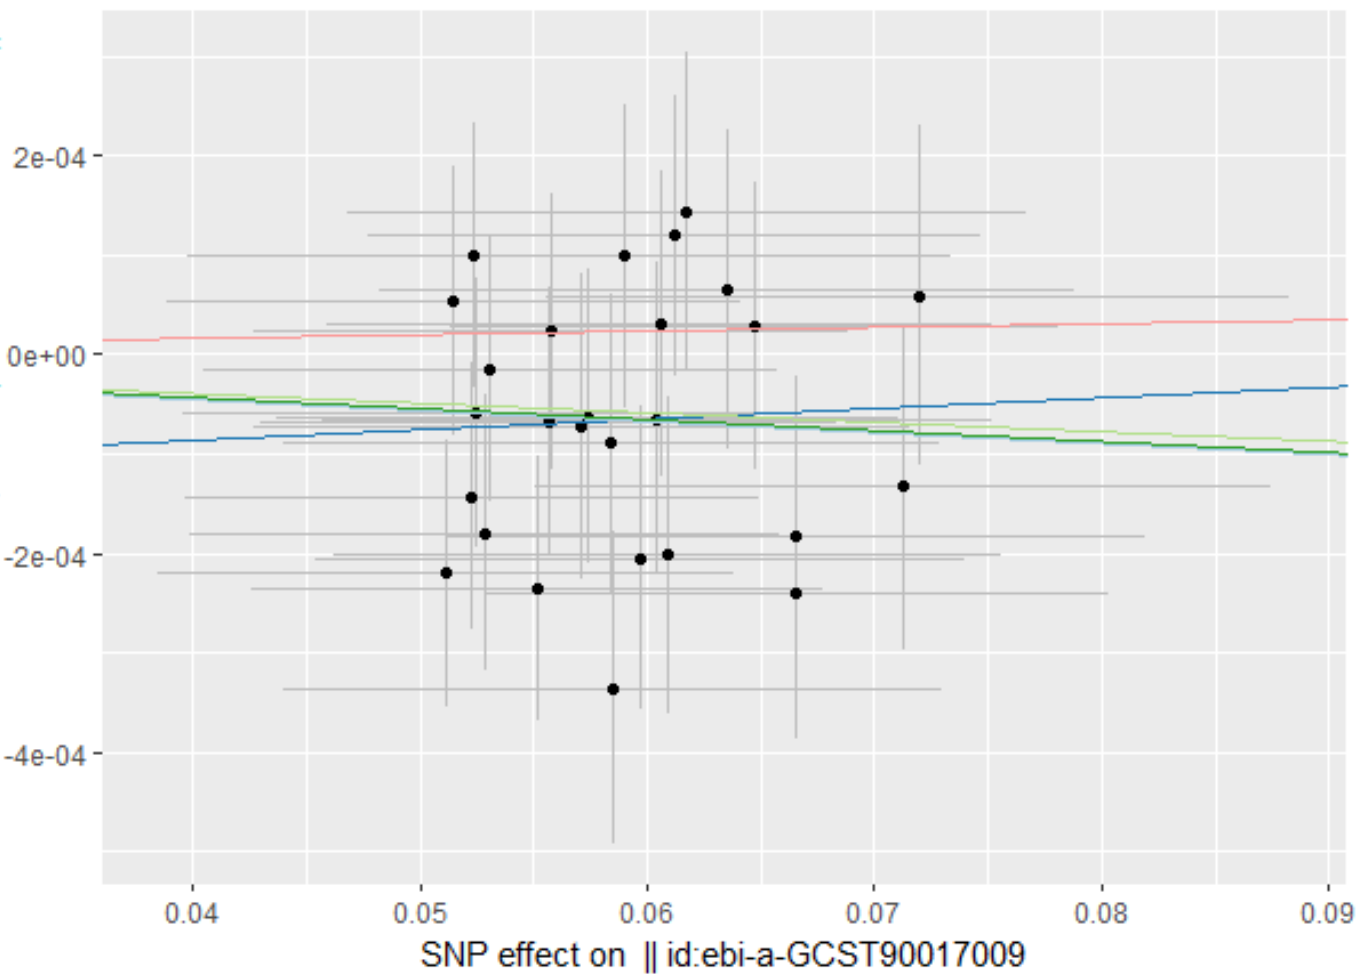

**Figure 60** Leave-one-out analysis, funnel plot, MR effect size and scatter plot for gut microbiota abundance (genus *Ruminococcus gauvreauii* group id.11342) on duodenal ulcer

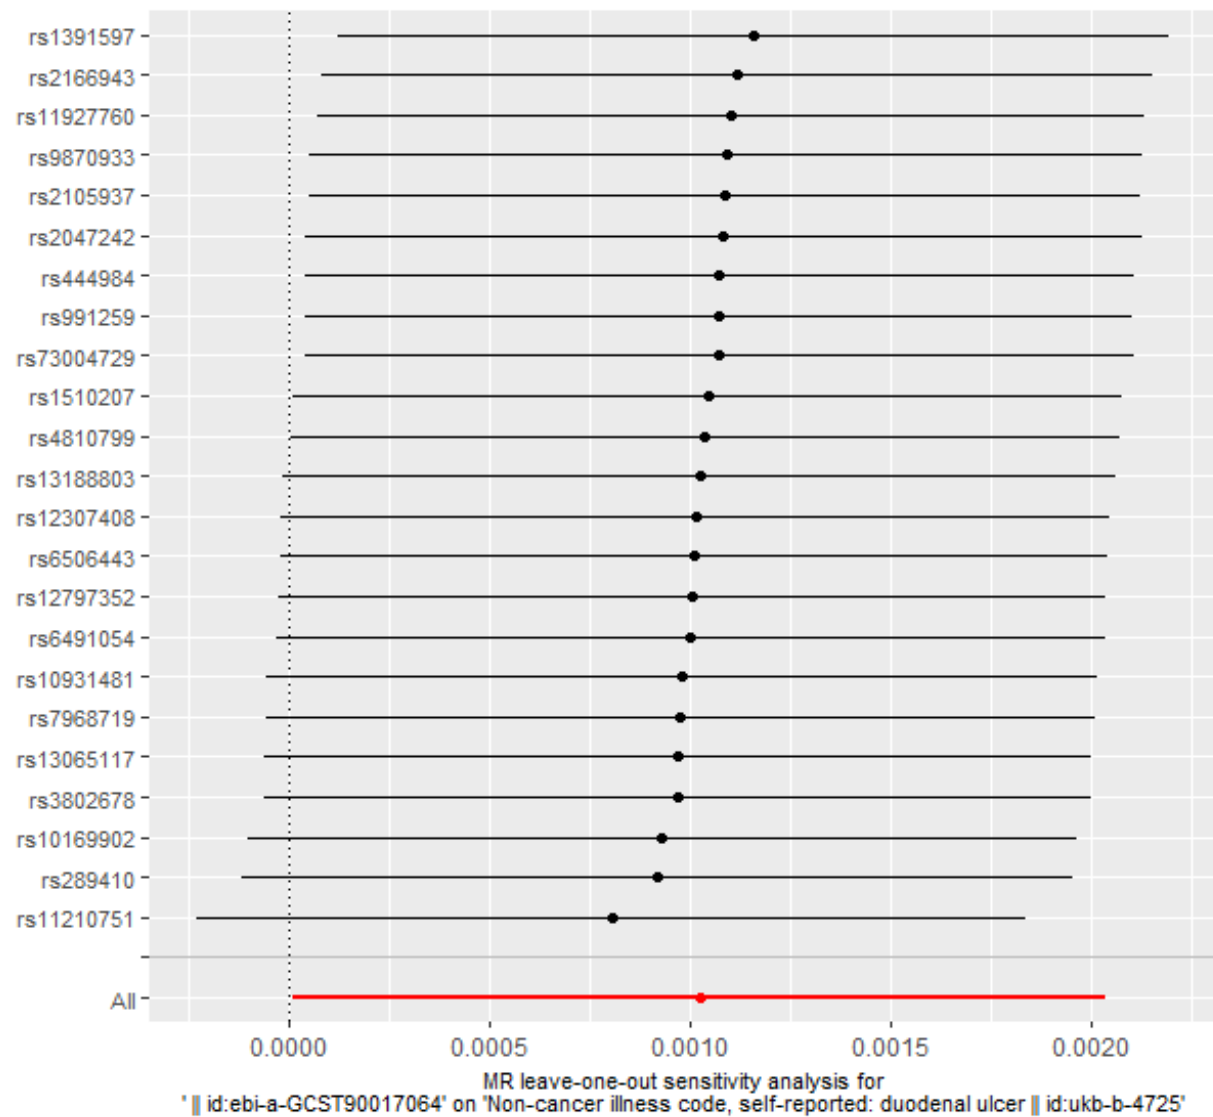

MR Method

- Inverse variance weighted
- MR Egger

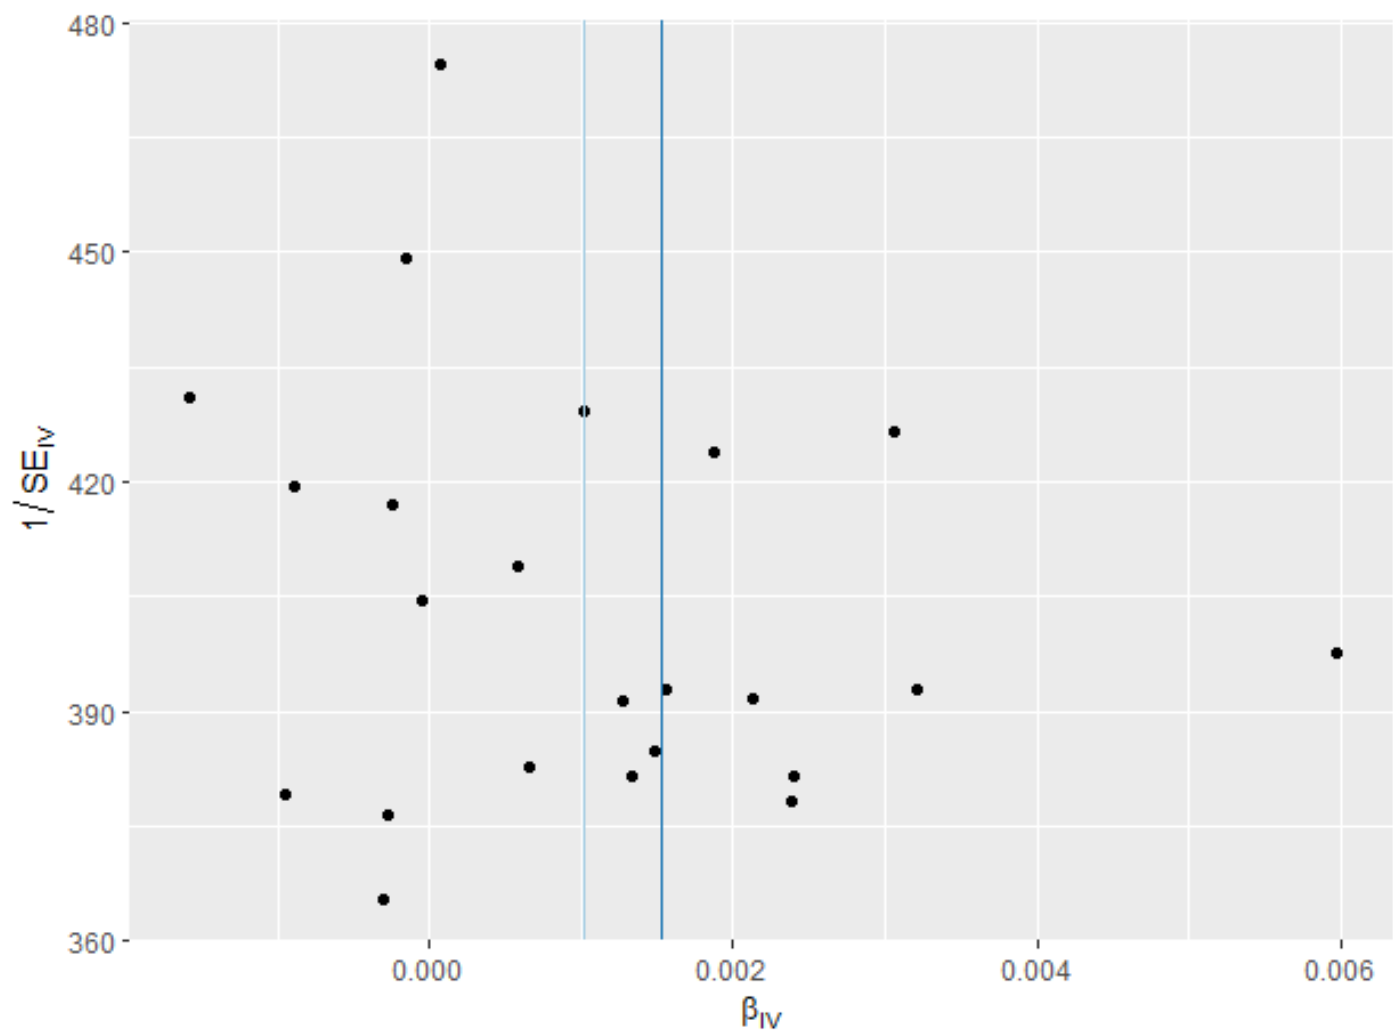

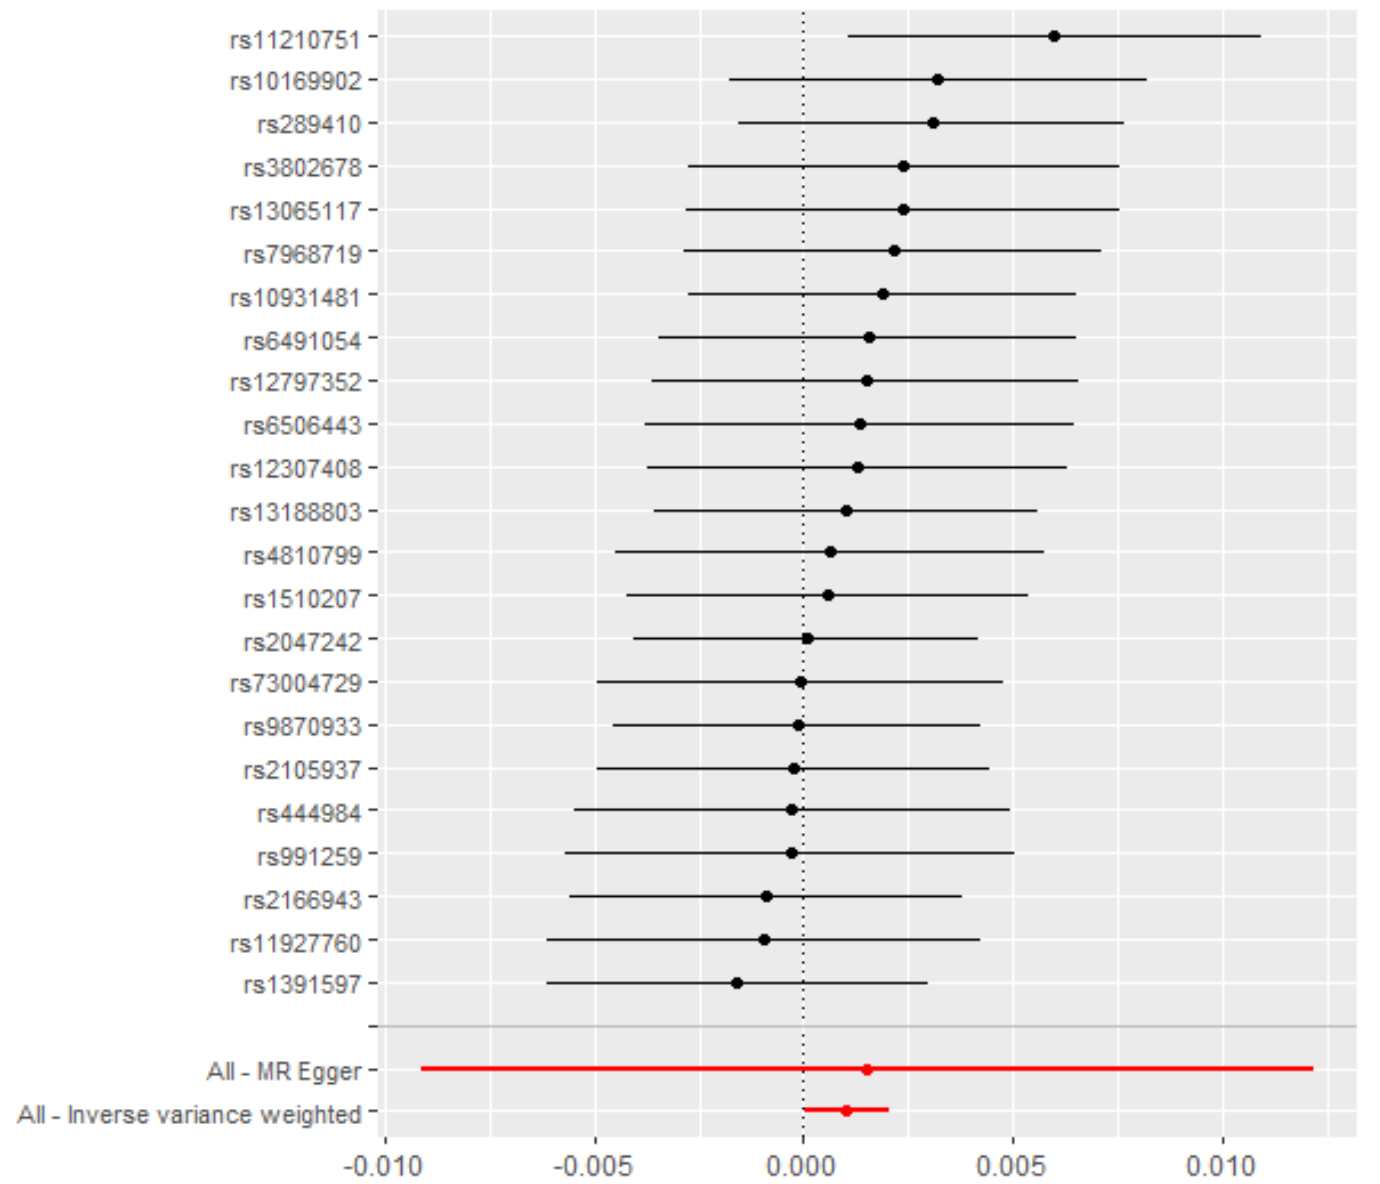

' || id:ebi-a-GCST90017064' on 'Non-cancer illness code, self-reported: duodenal ulcer' || id:ukb-b-4

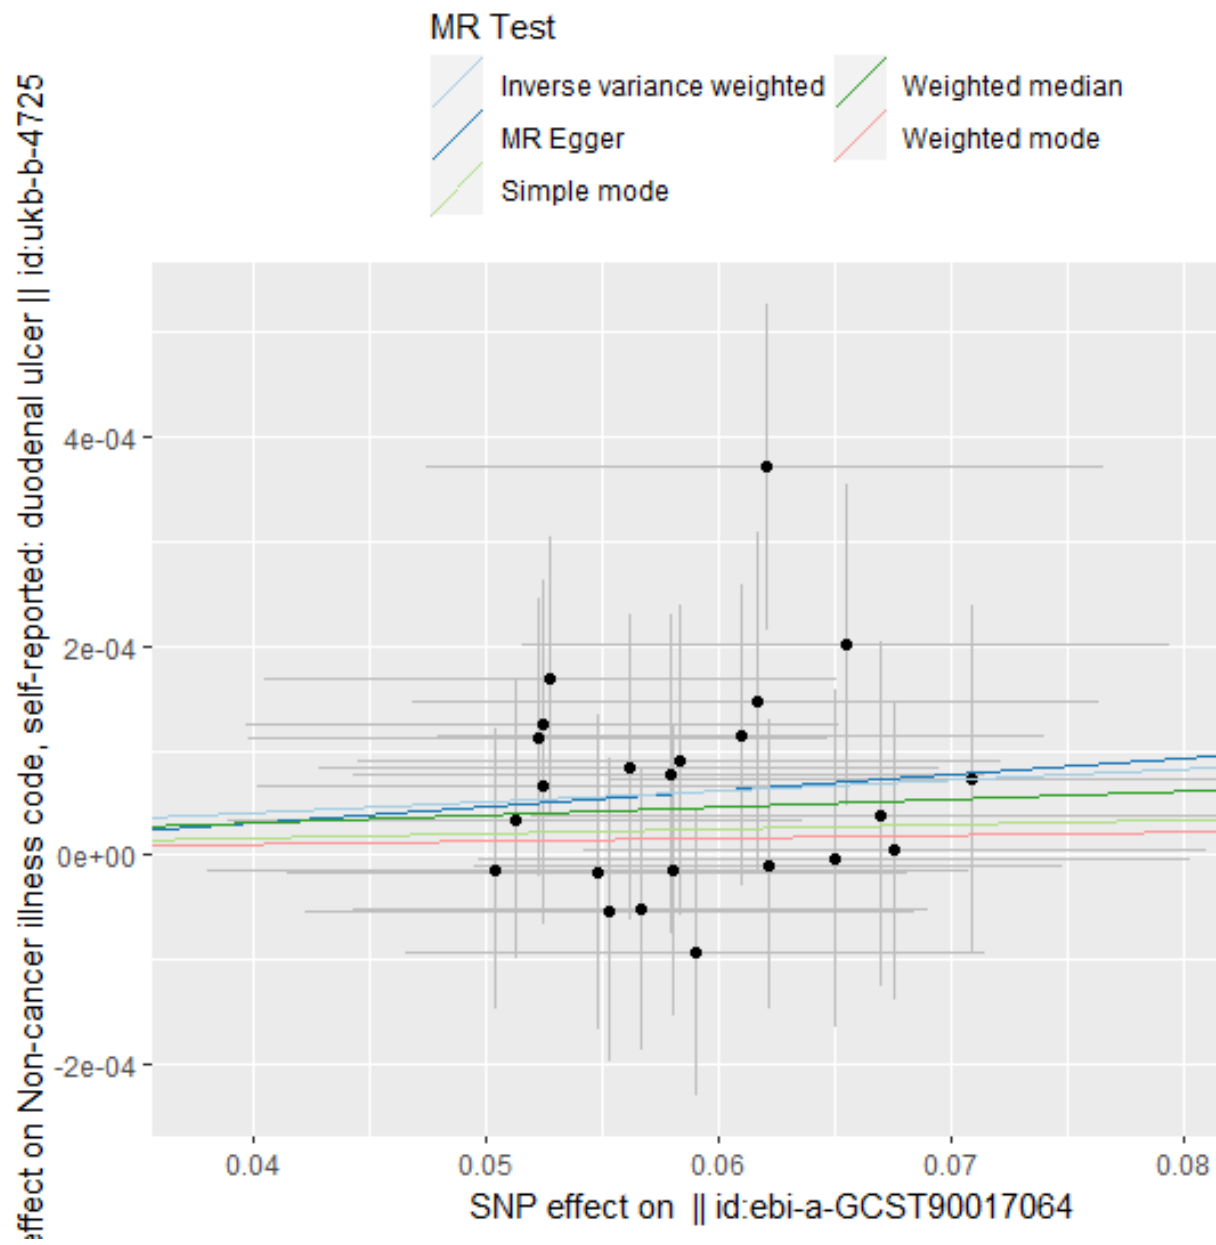



**Figure 61** Leave-one-out analysis, funnel plot, MR effect size and scatter plot for gut microbiota abundance (order Verrucomicrobiales id.4030) on duodenal ulcer

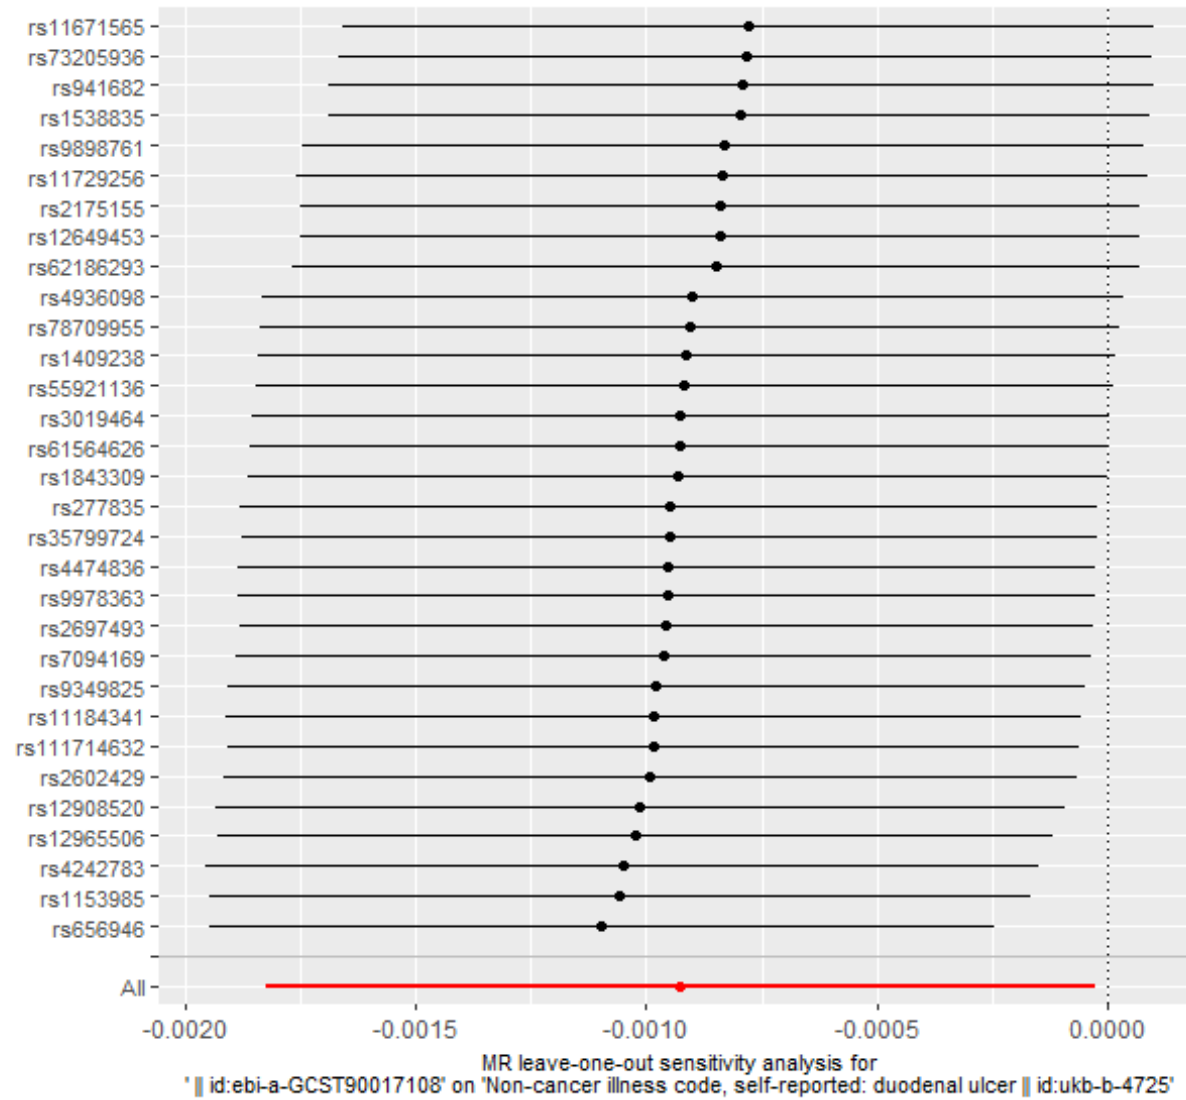

MR Method

- Inverse variance weighted
- MR Egger

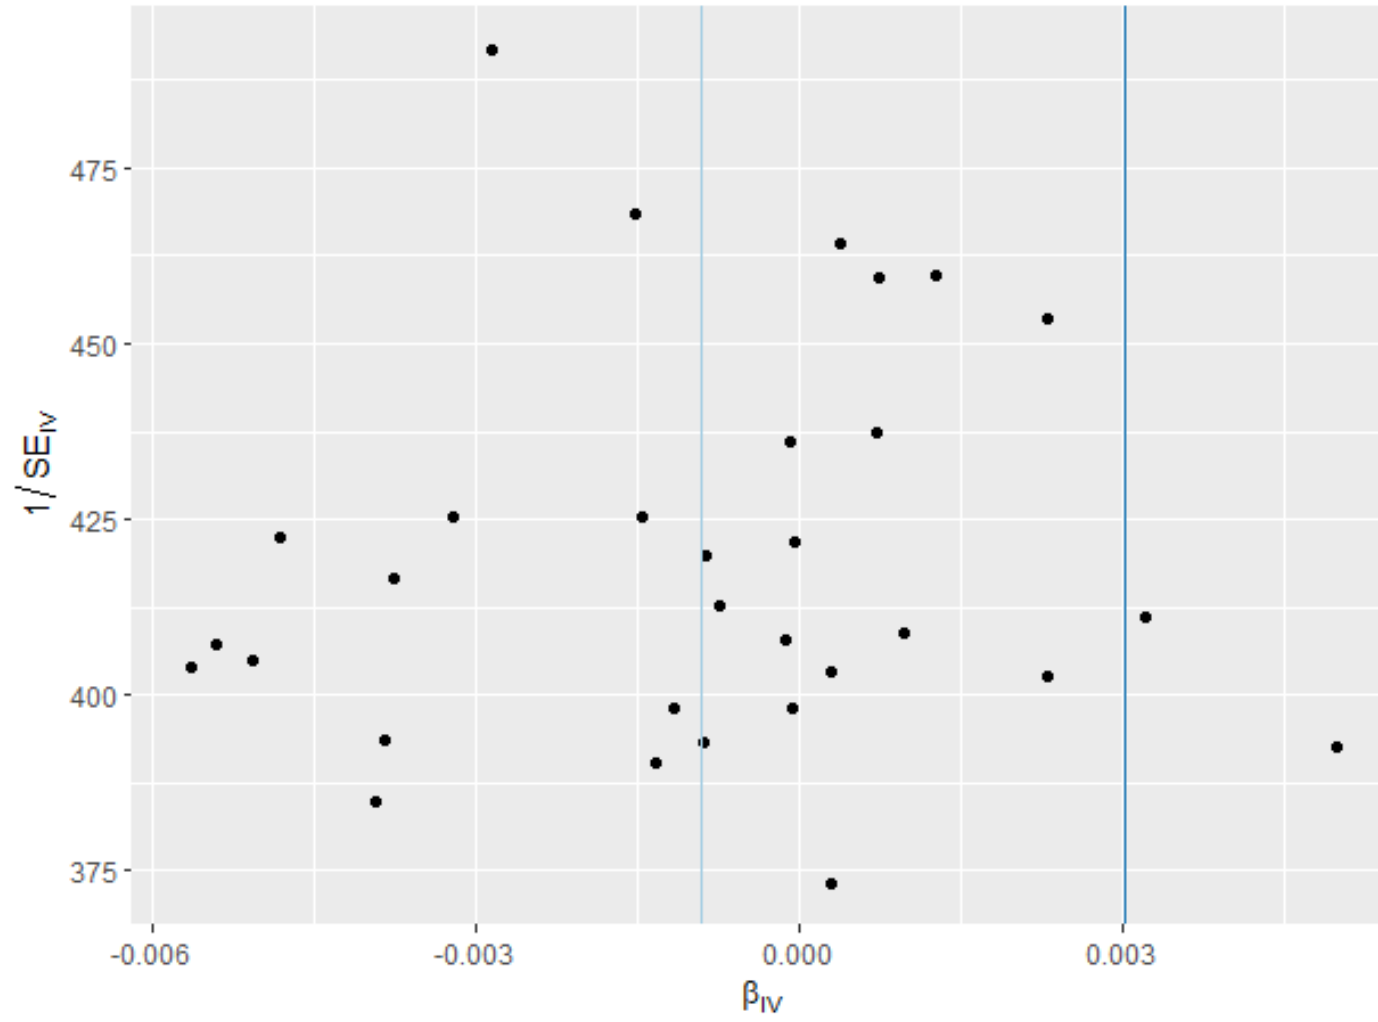

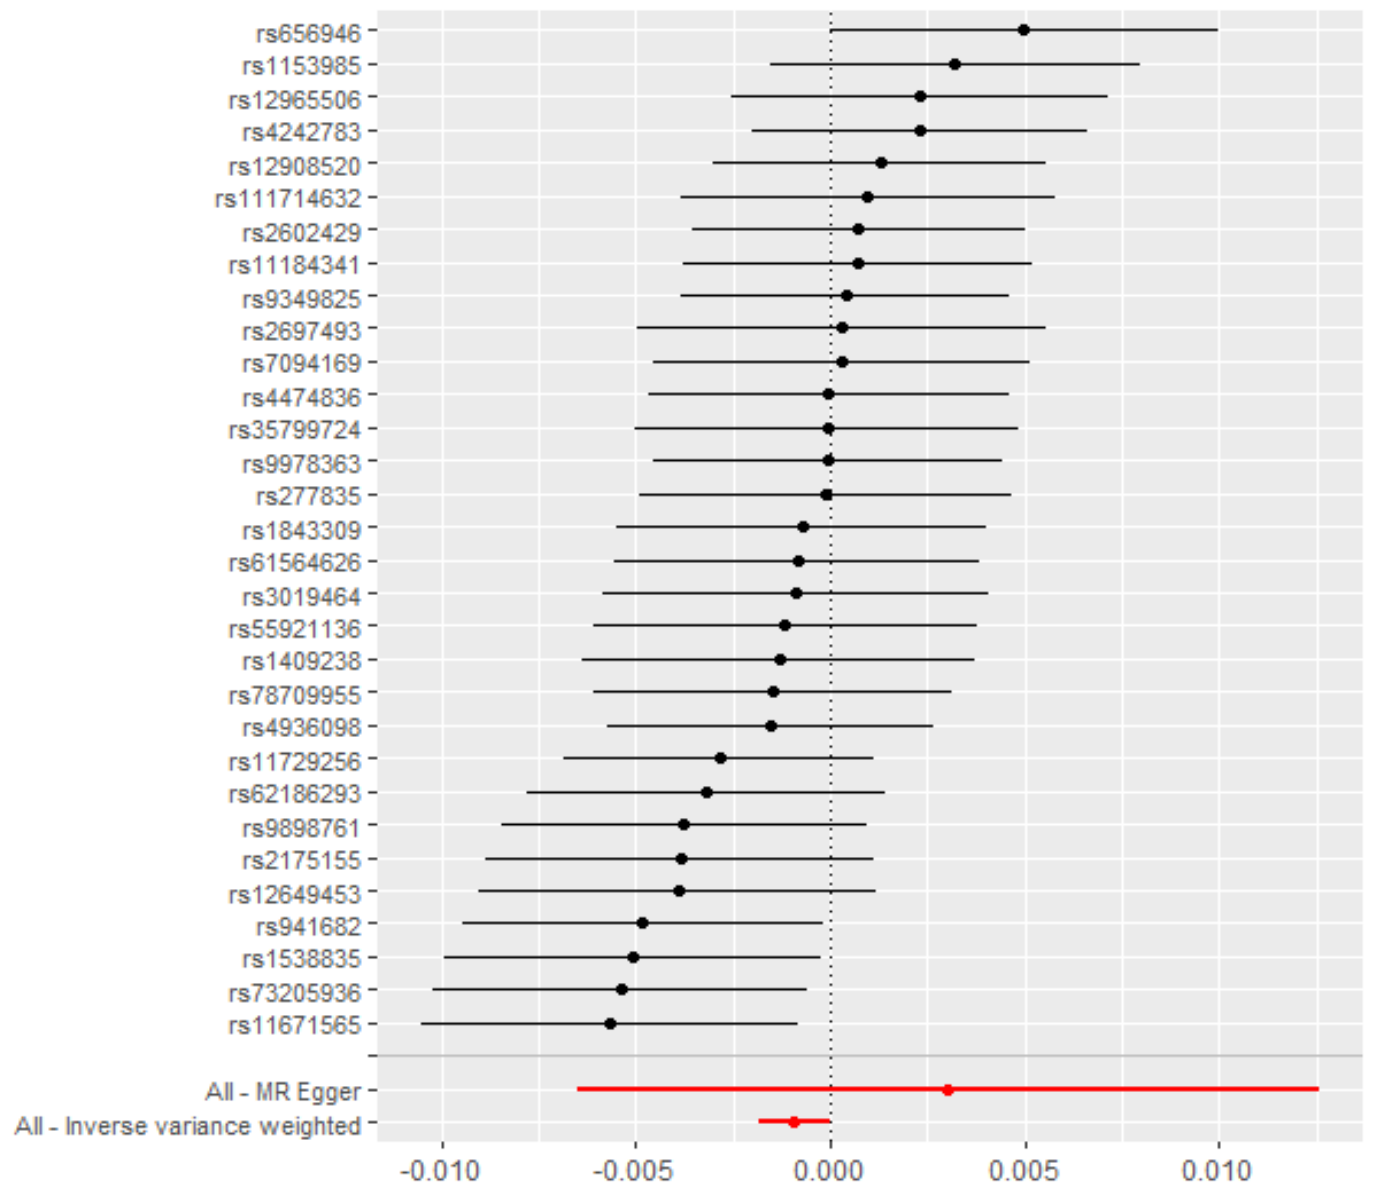

' || id:ebi-a-GCST90017108' on 'Non-cancer illness code, self-reported: duodenal ulcer' || id:ukb-b-4

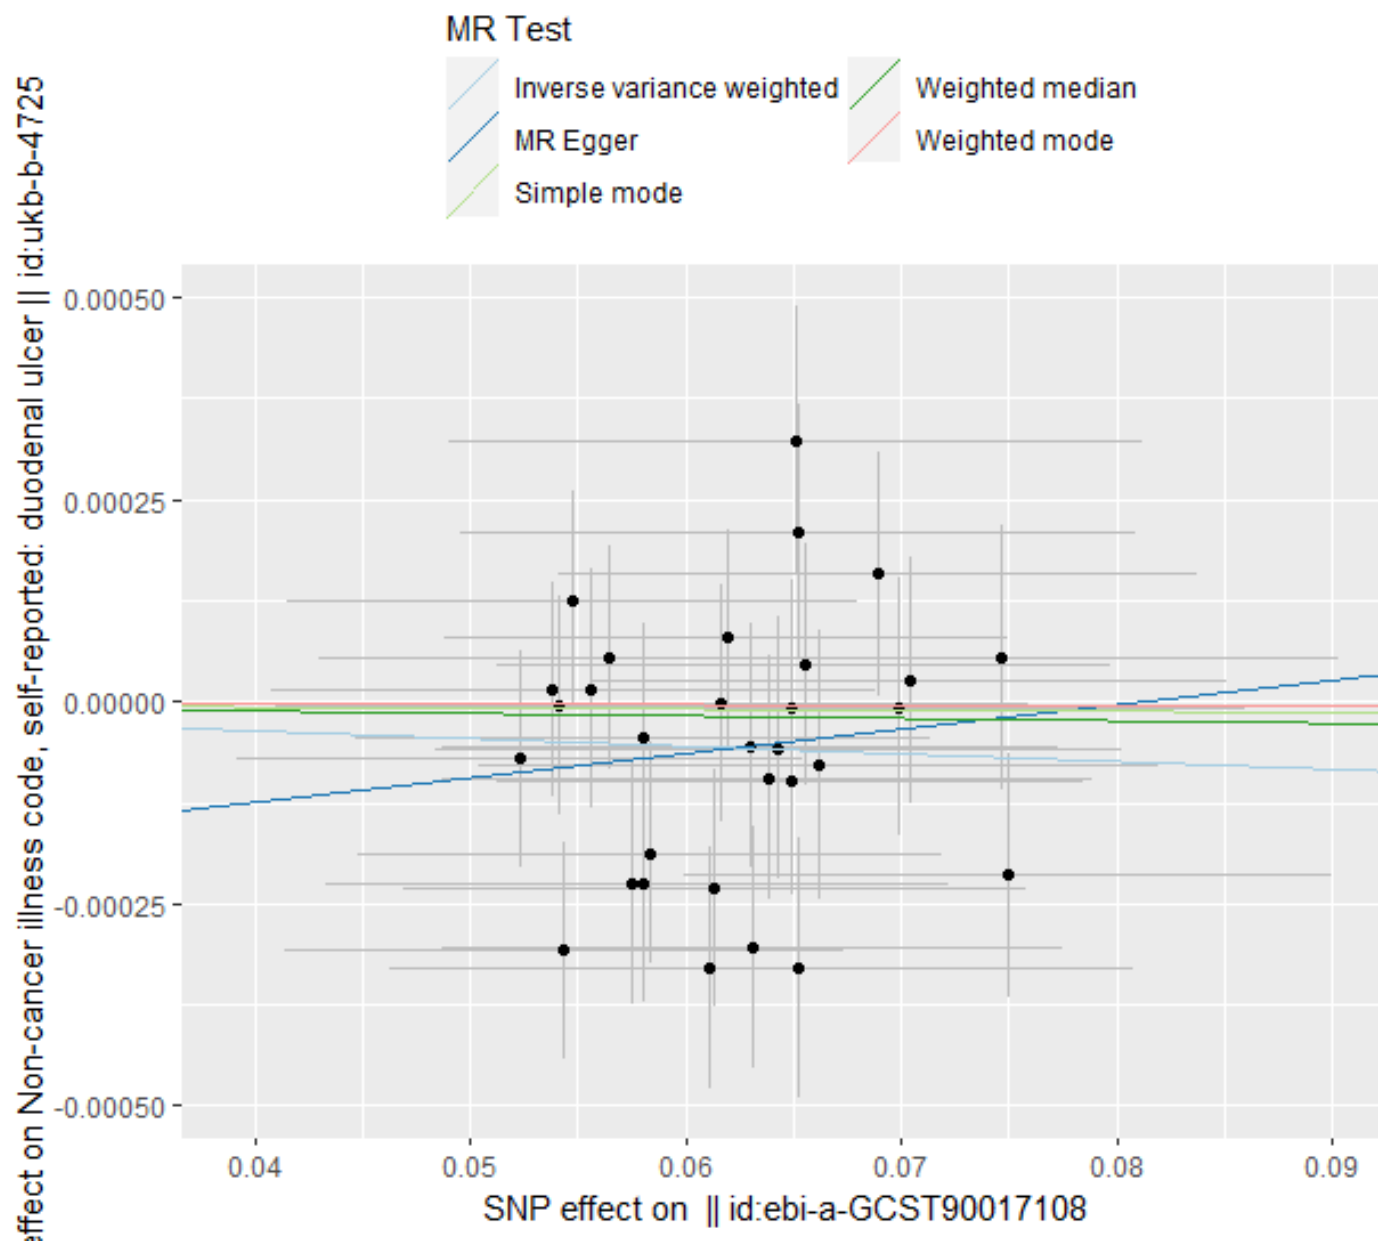

**Figure 62** Leave-one-out analysis, funnel plot, MR effect size and scatter plot for gut microbiota abundance (class Verrucomicrobiae id.4029) on chronic gastritis

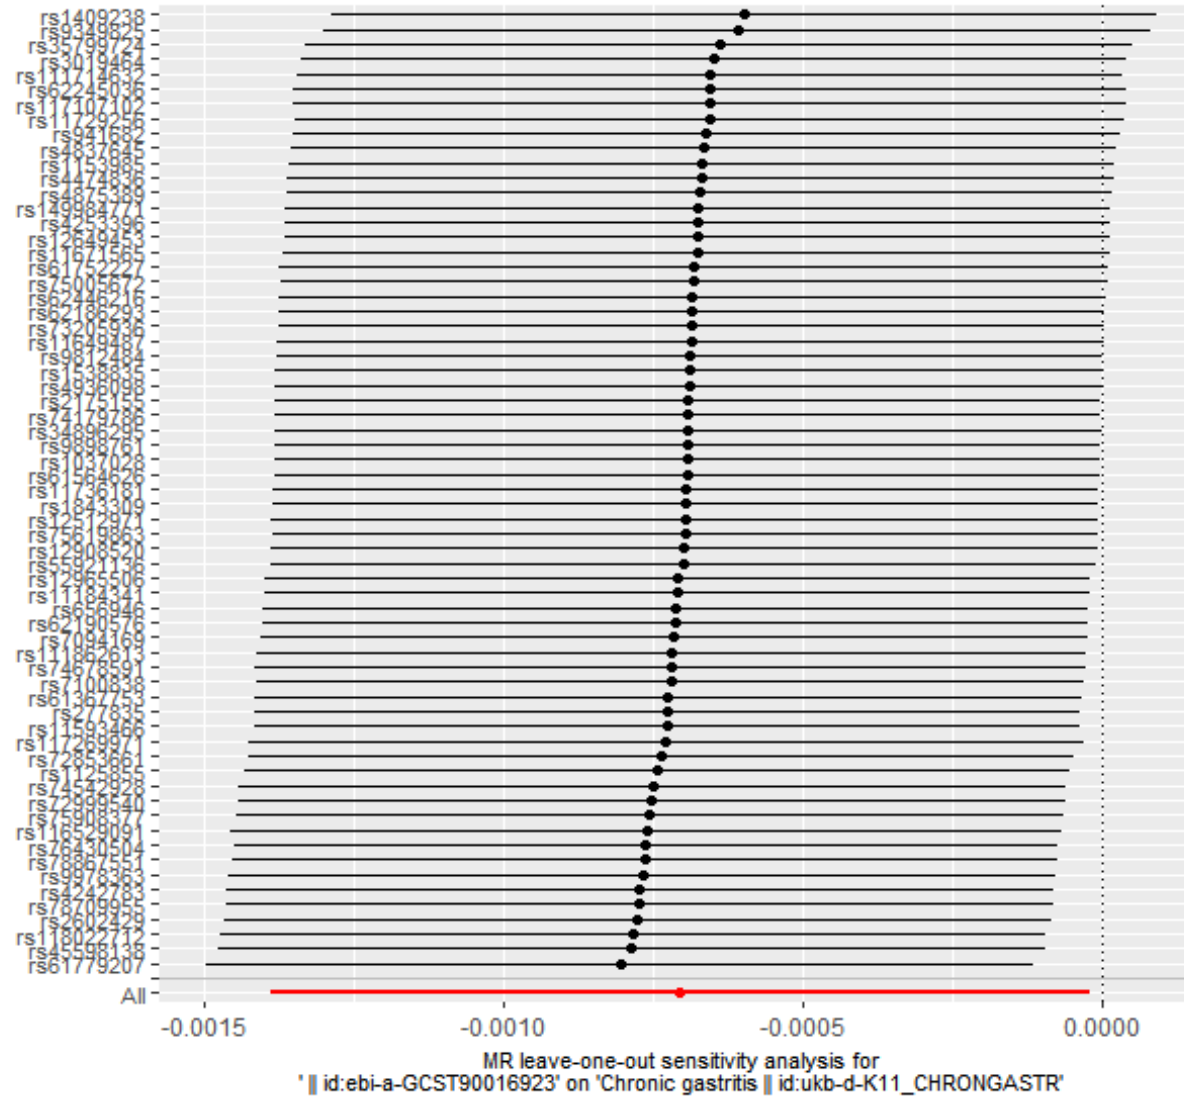

MR Method

- Inverse variance weighted
- MR Egger

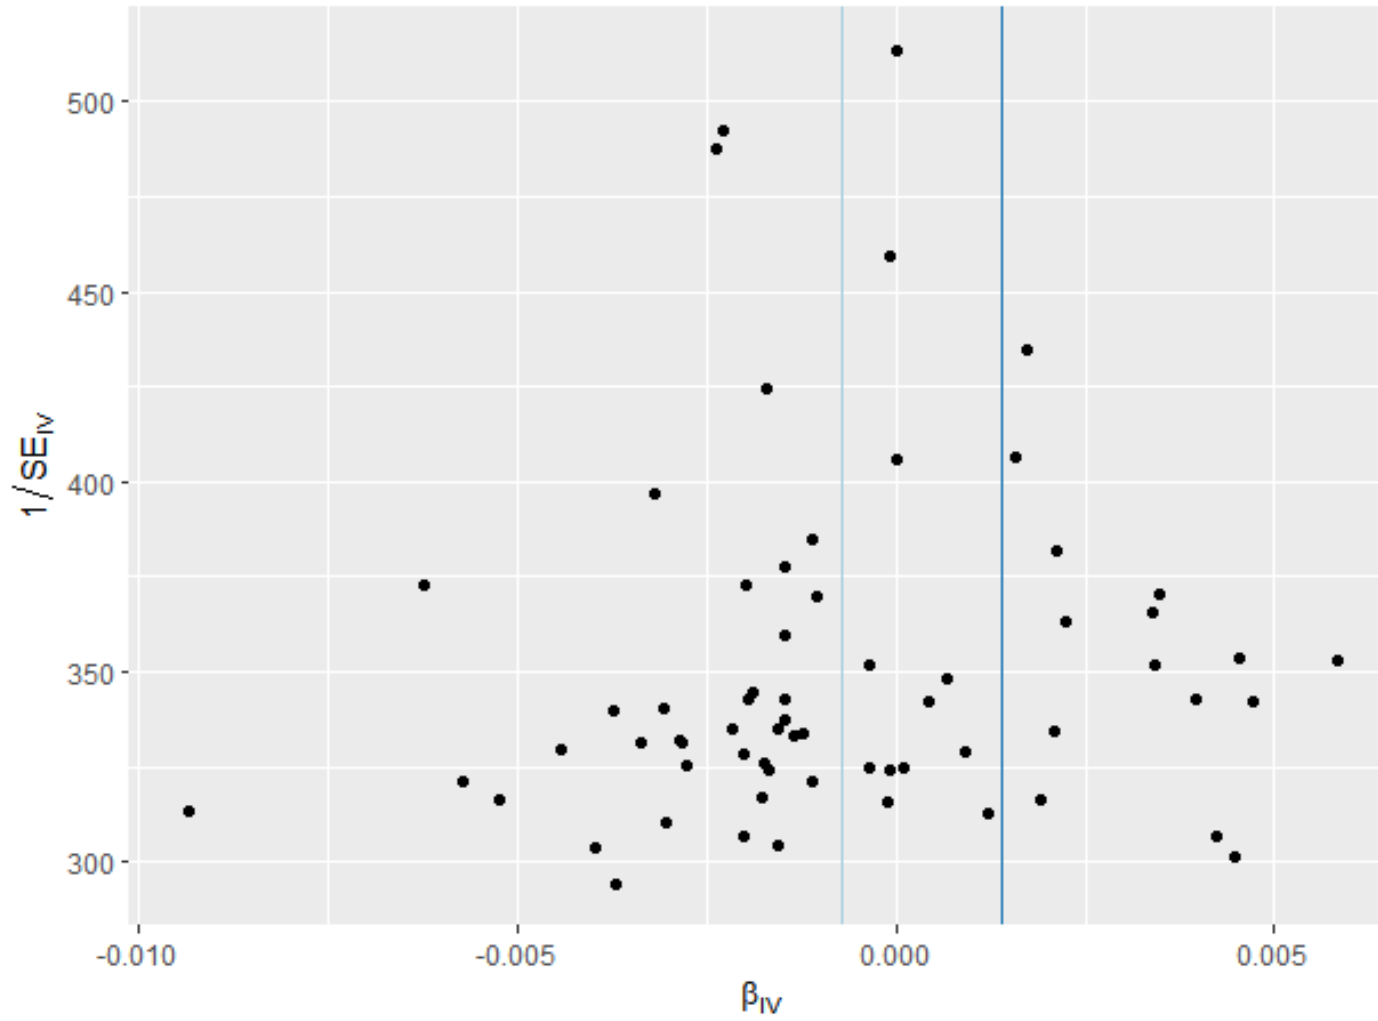

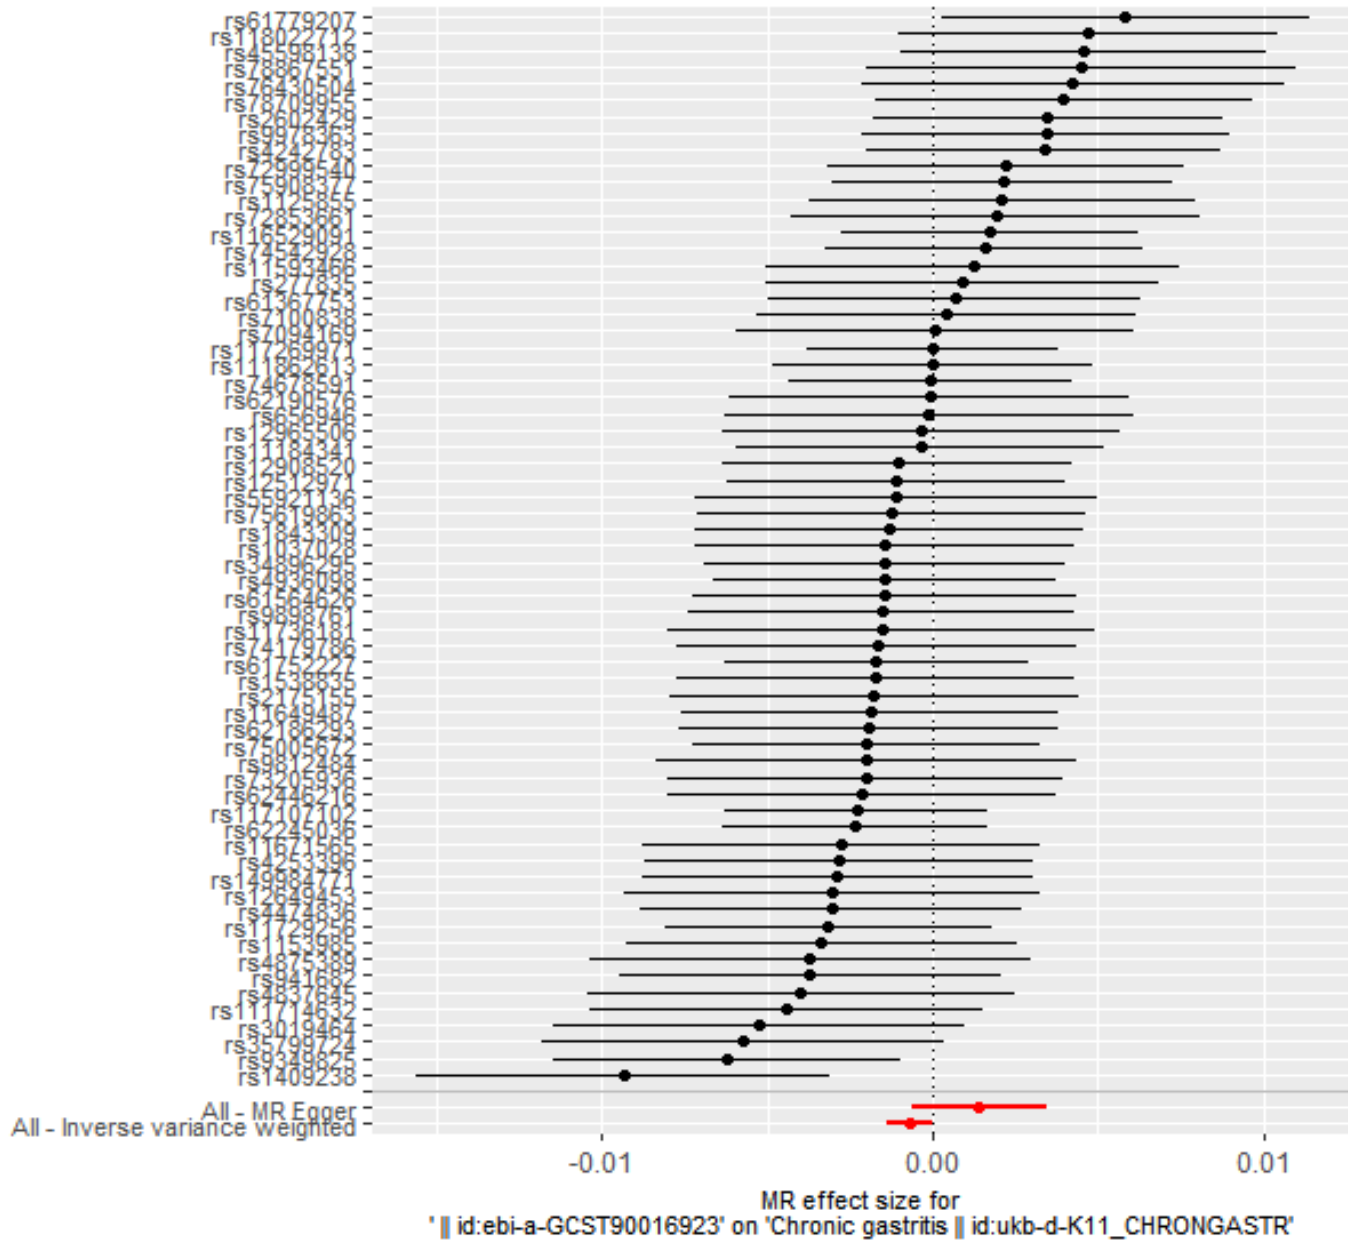

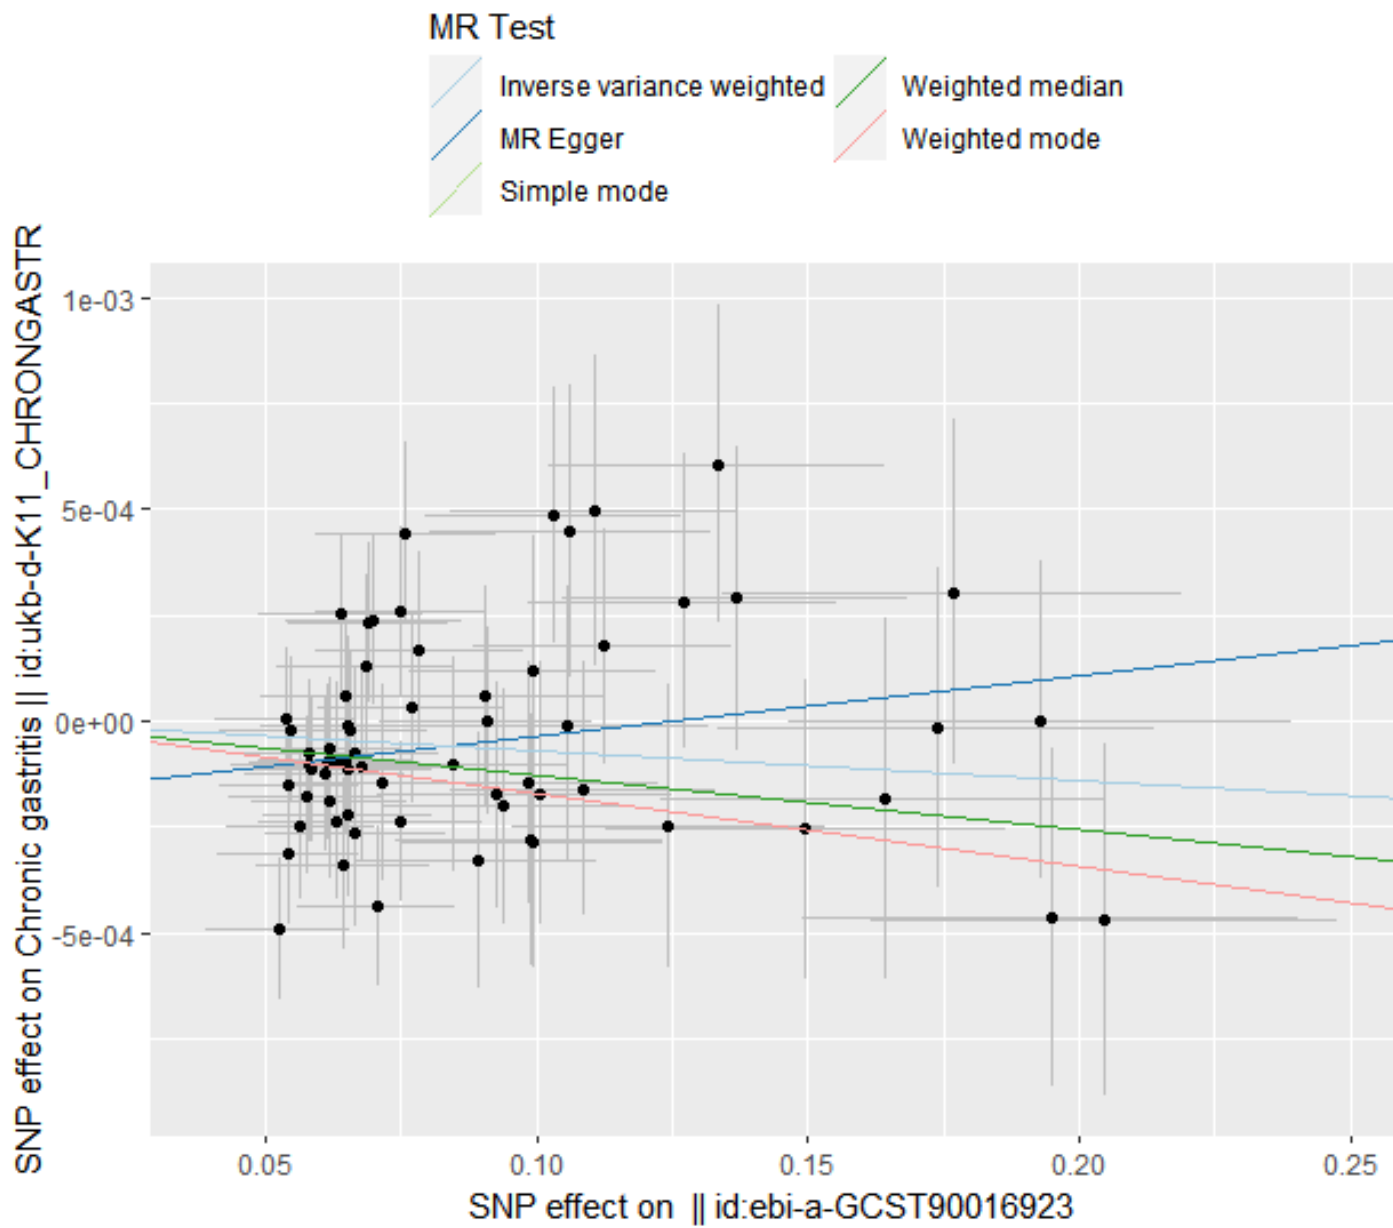



**Figure 63** Leave-one-out analysis, funnel plot, MR effect size and scatter plot for gut microbiota abundance (genus *Butyricicoccus* id.2055) on chronic gastritis

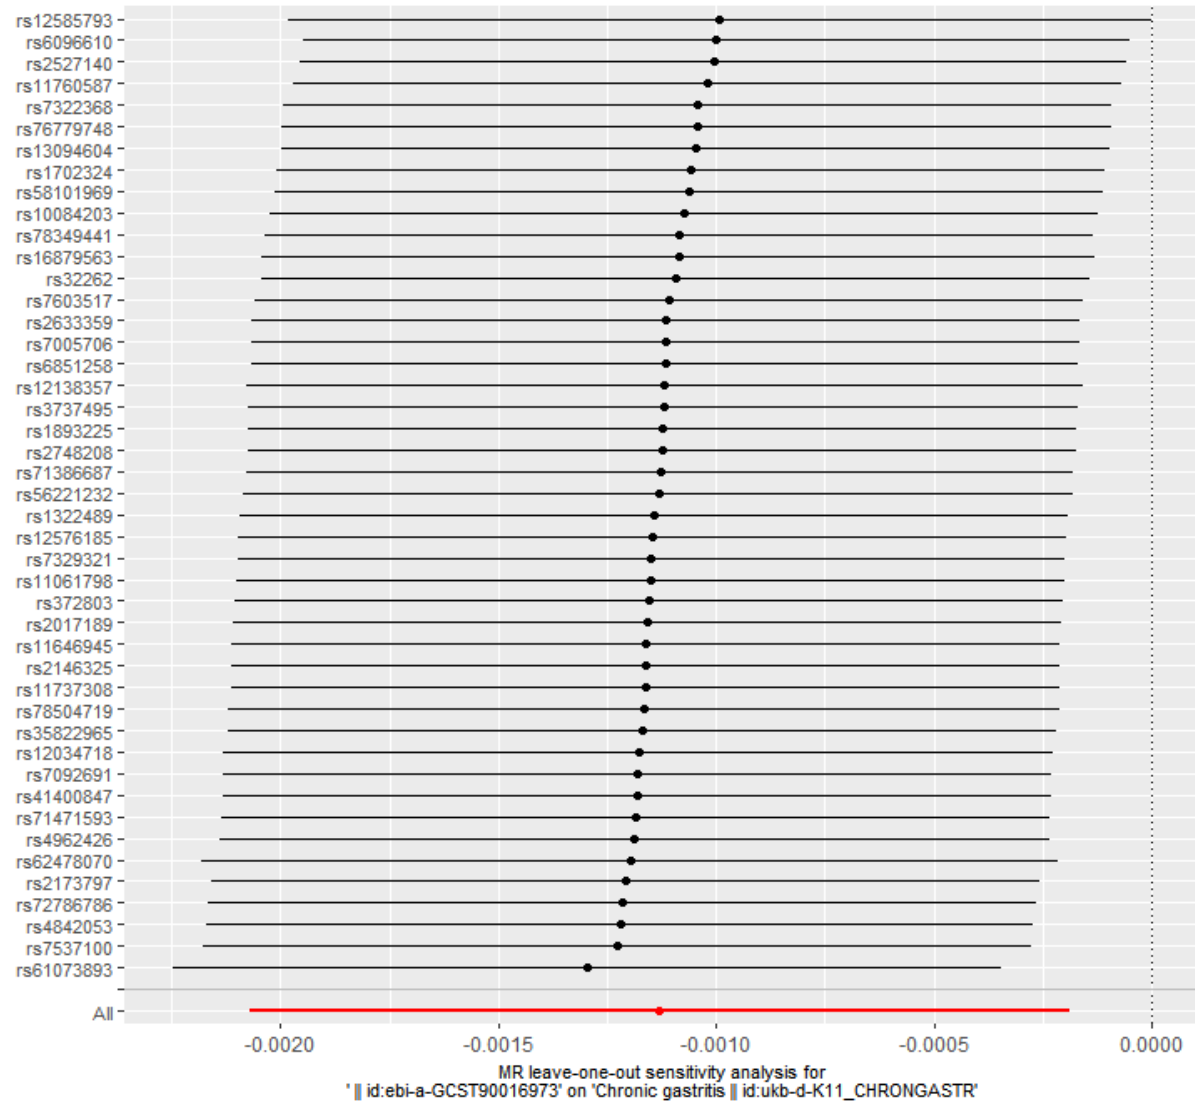

MR Method

- Inverse variance weighted
- MR Egger

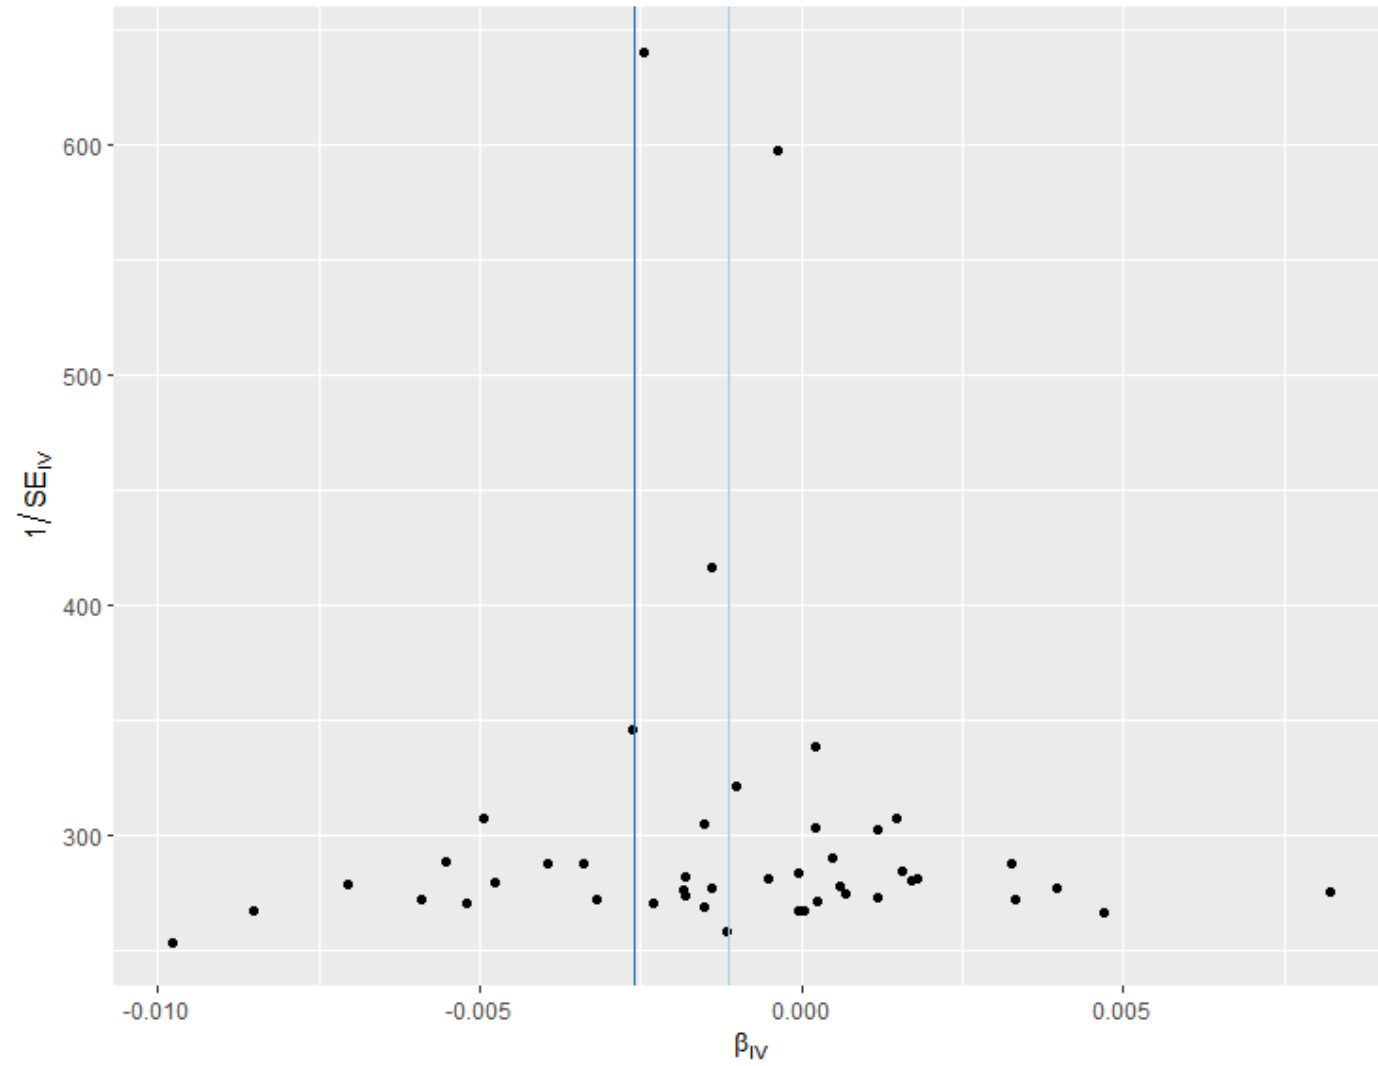

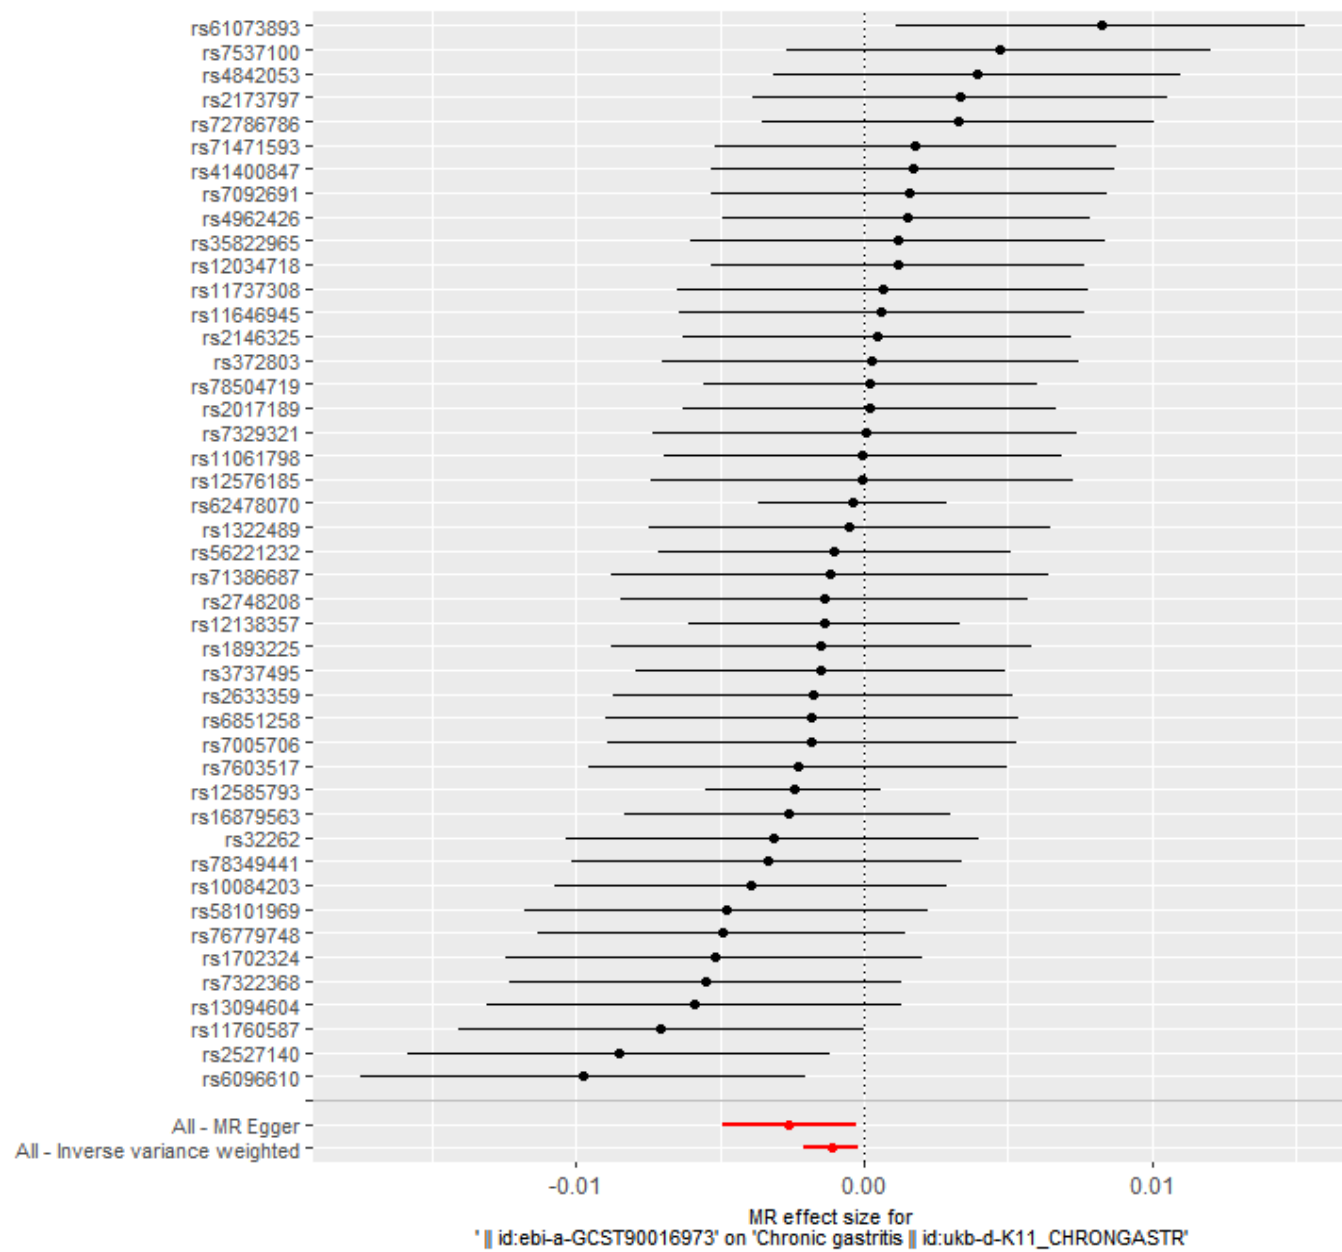

MR Test

- Inverse variance weighted
- MR Egger
- Simple mode
- Weighted median
- Weighted mode

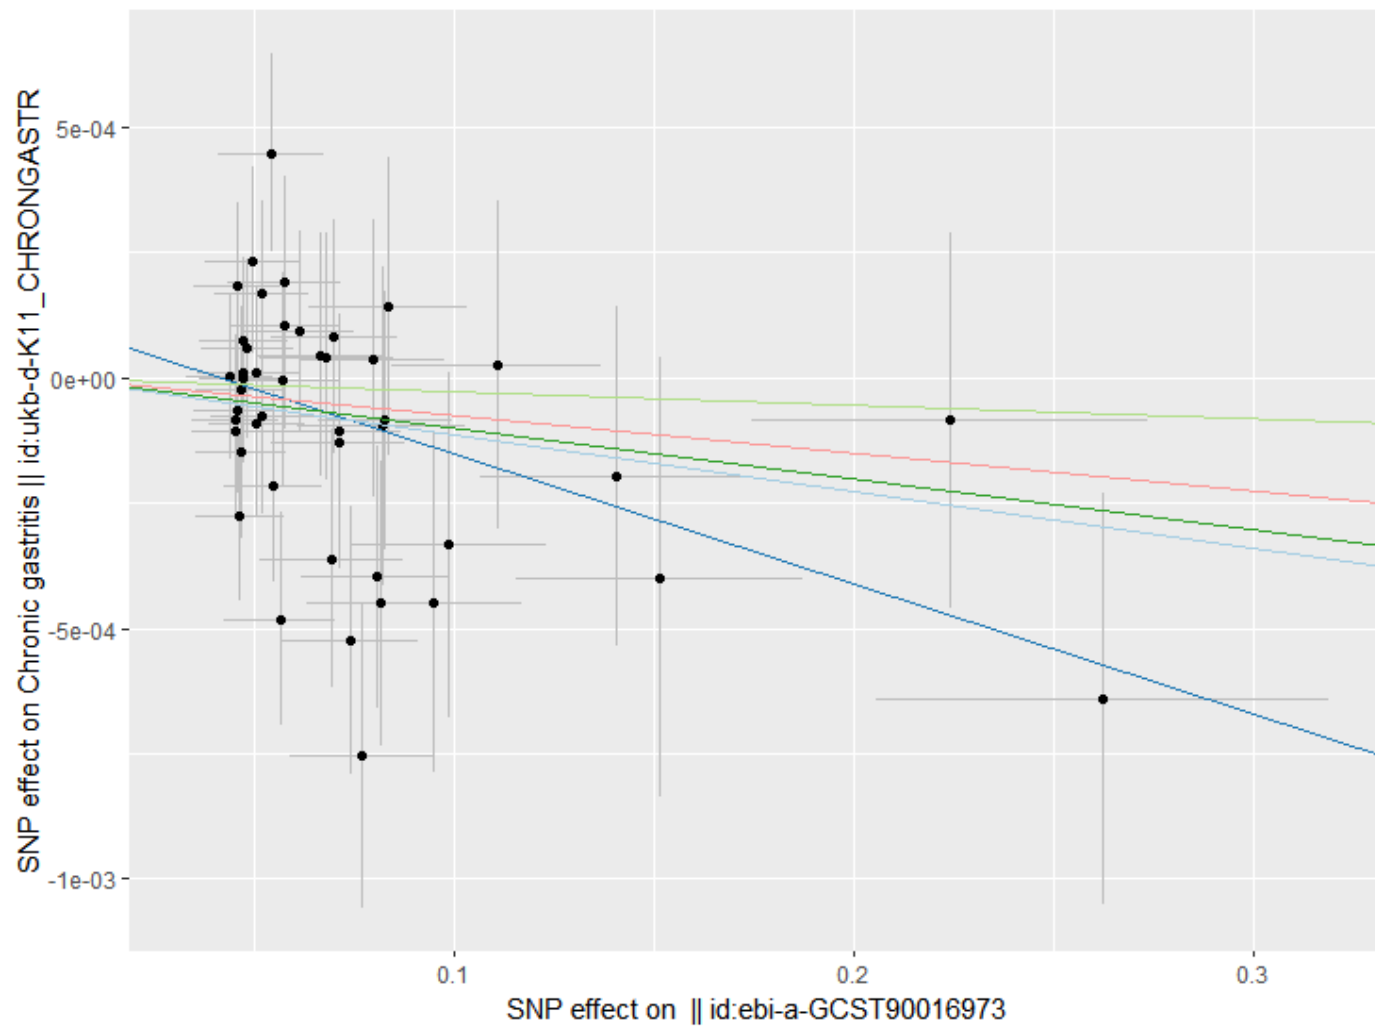

**Figure 64** Leave-one-out analysis, funnel plot, MR effect size and scatter plot for gut microbiota abundance (genus *Eubacterium fissicatena* group id.14373) on chronic gastritis

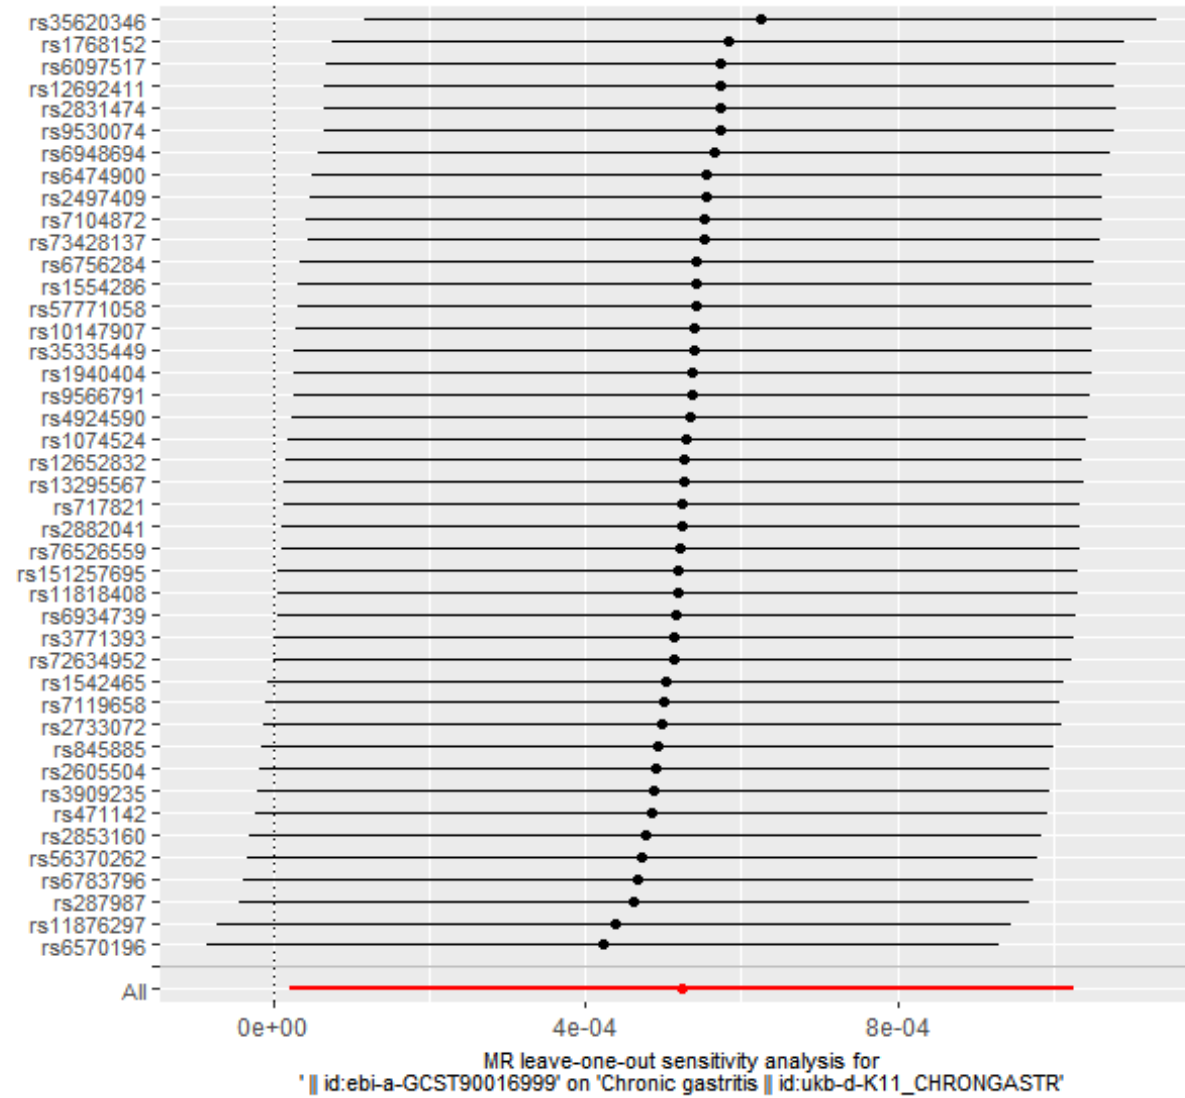

MR Method

- Inverse variance weighted
- MR Egger

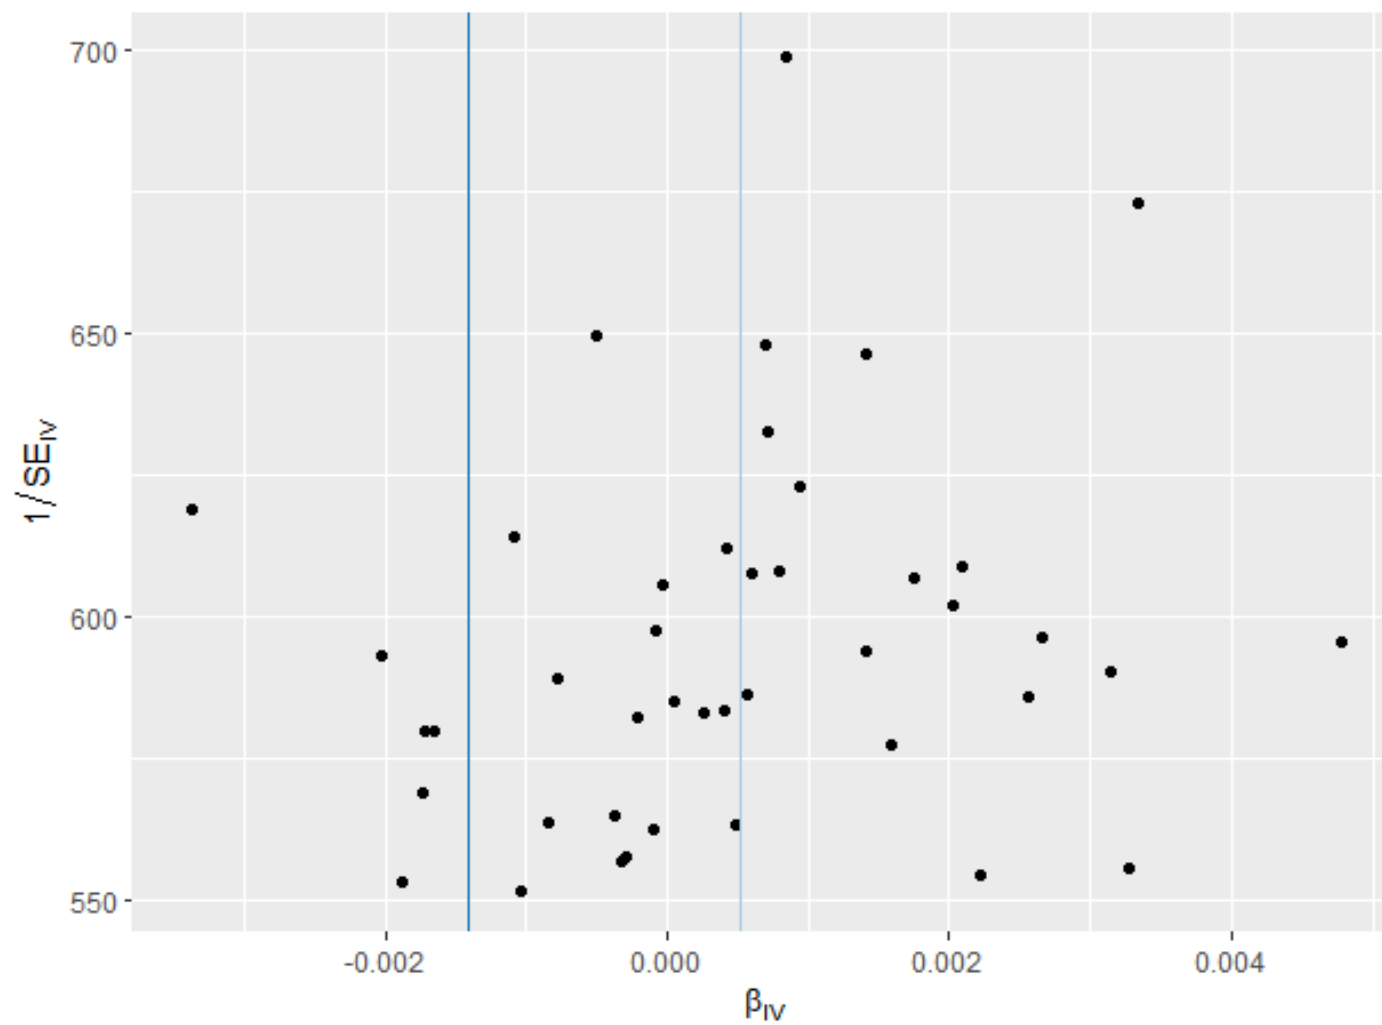

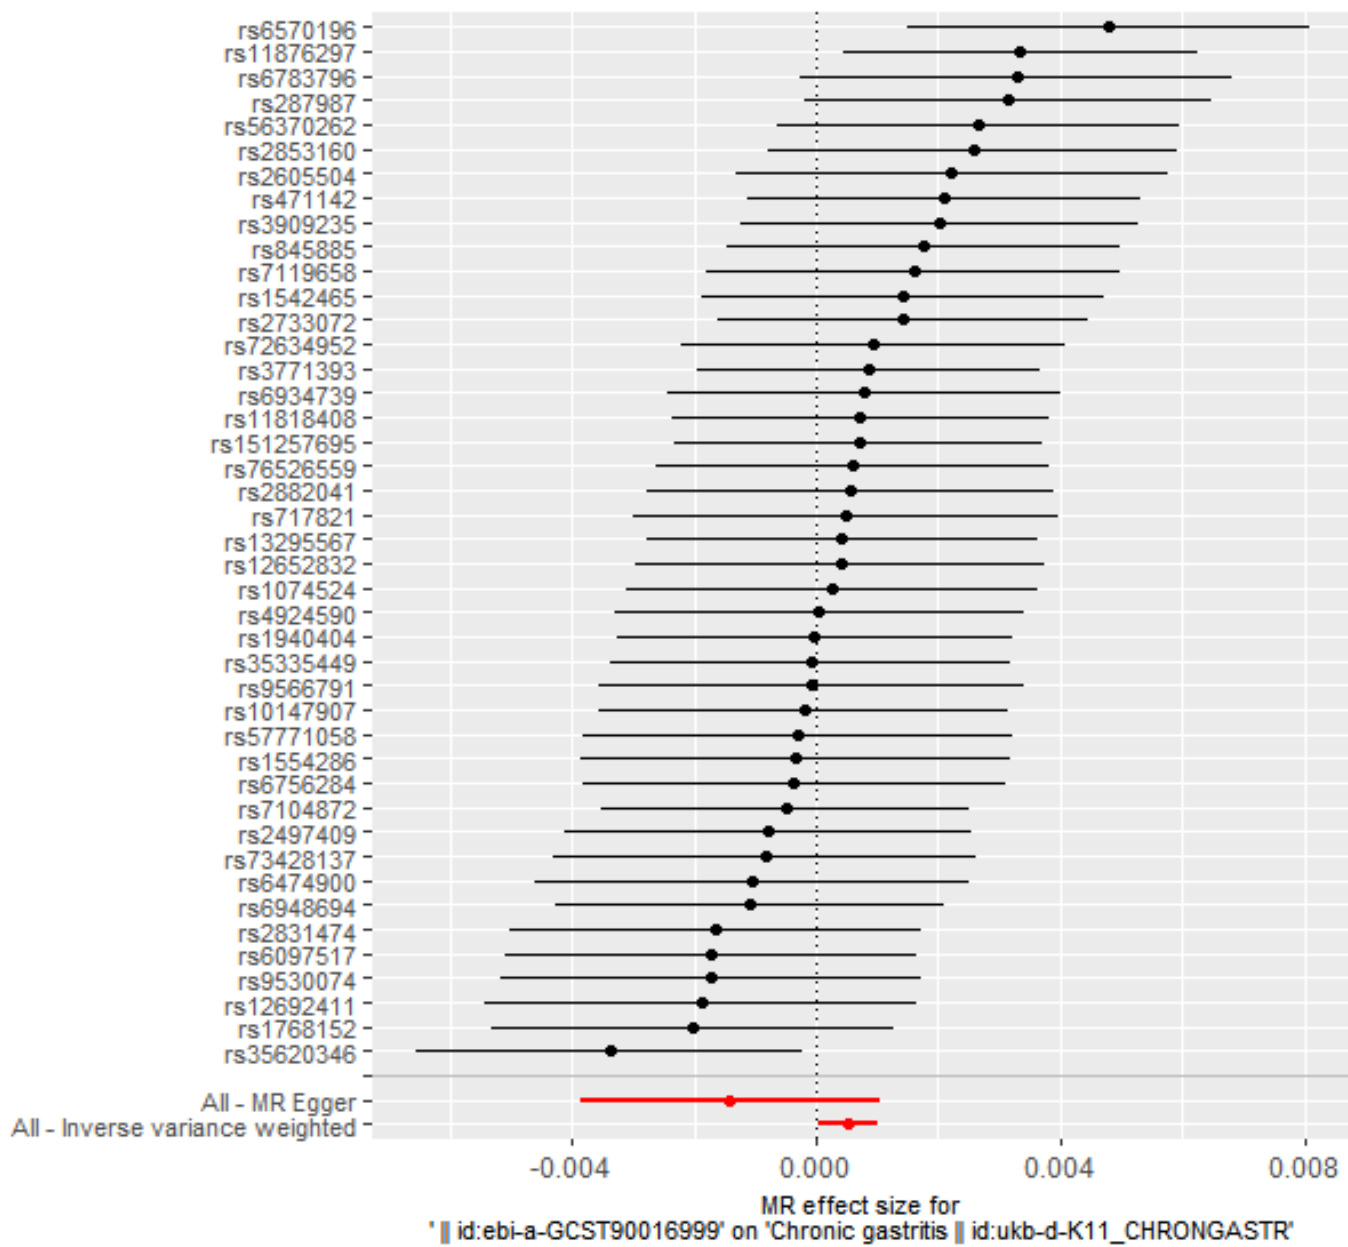

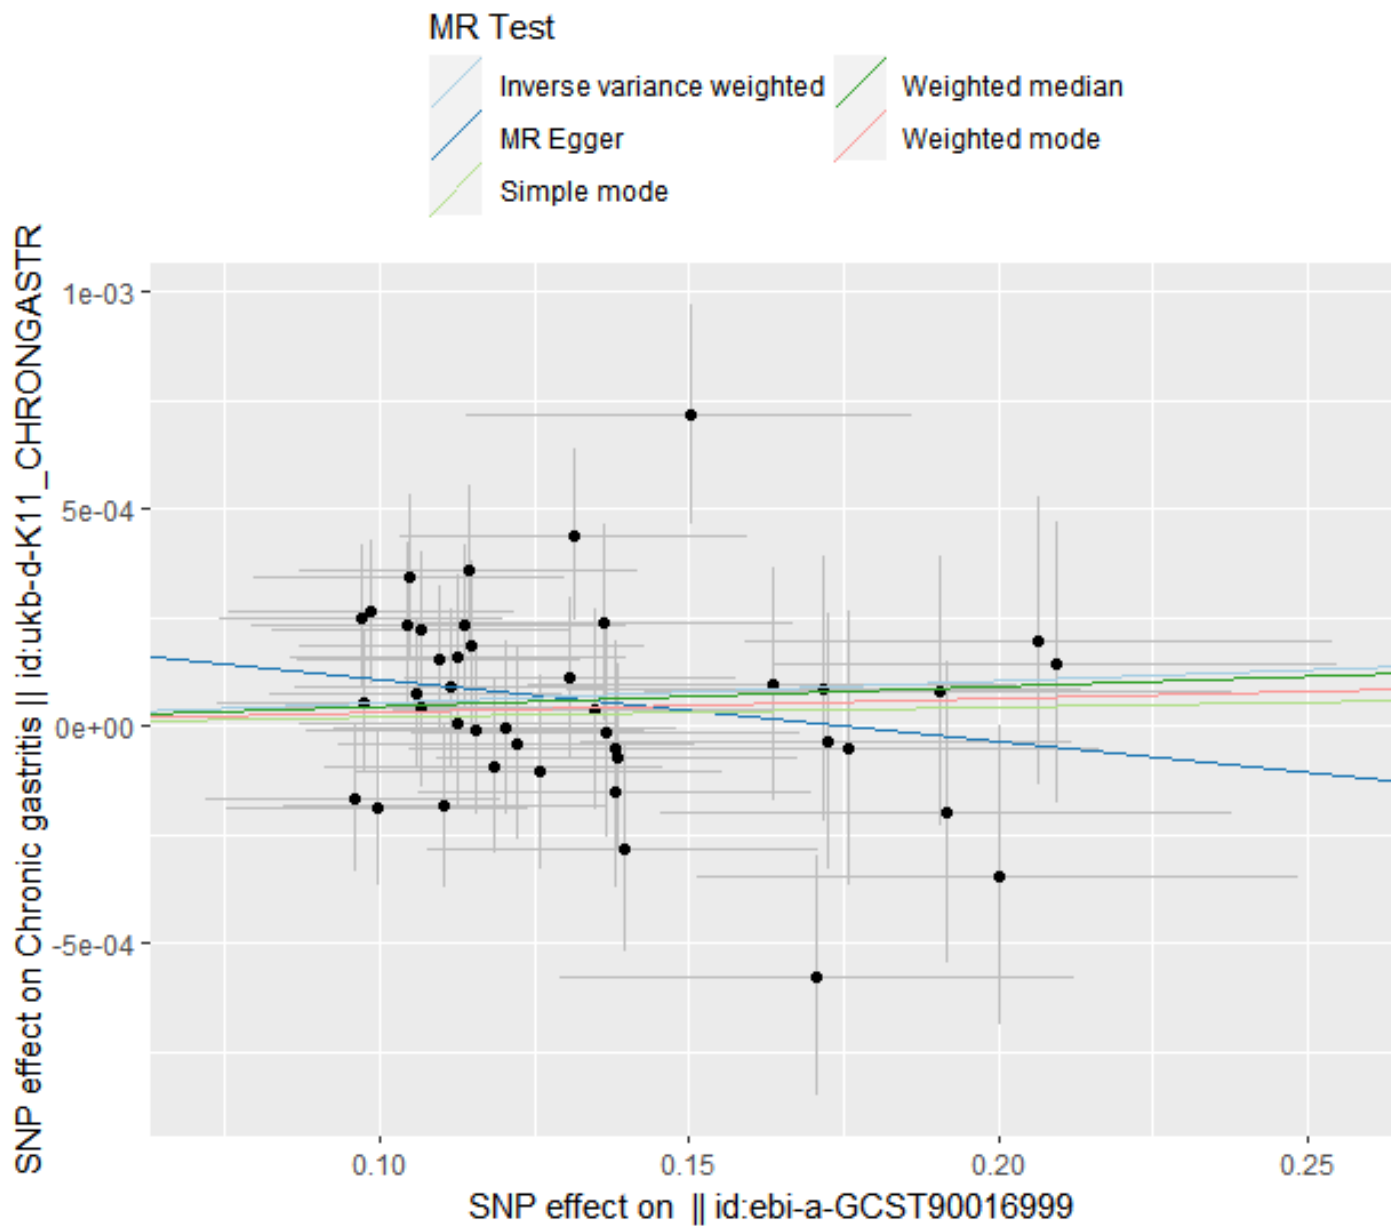



**Figure 65** Leave-one-out analysis, funnel plot, MR effect size and scatter plot for gut microbiota abundance (genus *Lachnospiraceae* UCG010 id.11330) on chronic gastritis

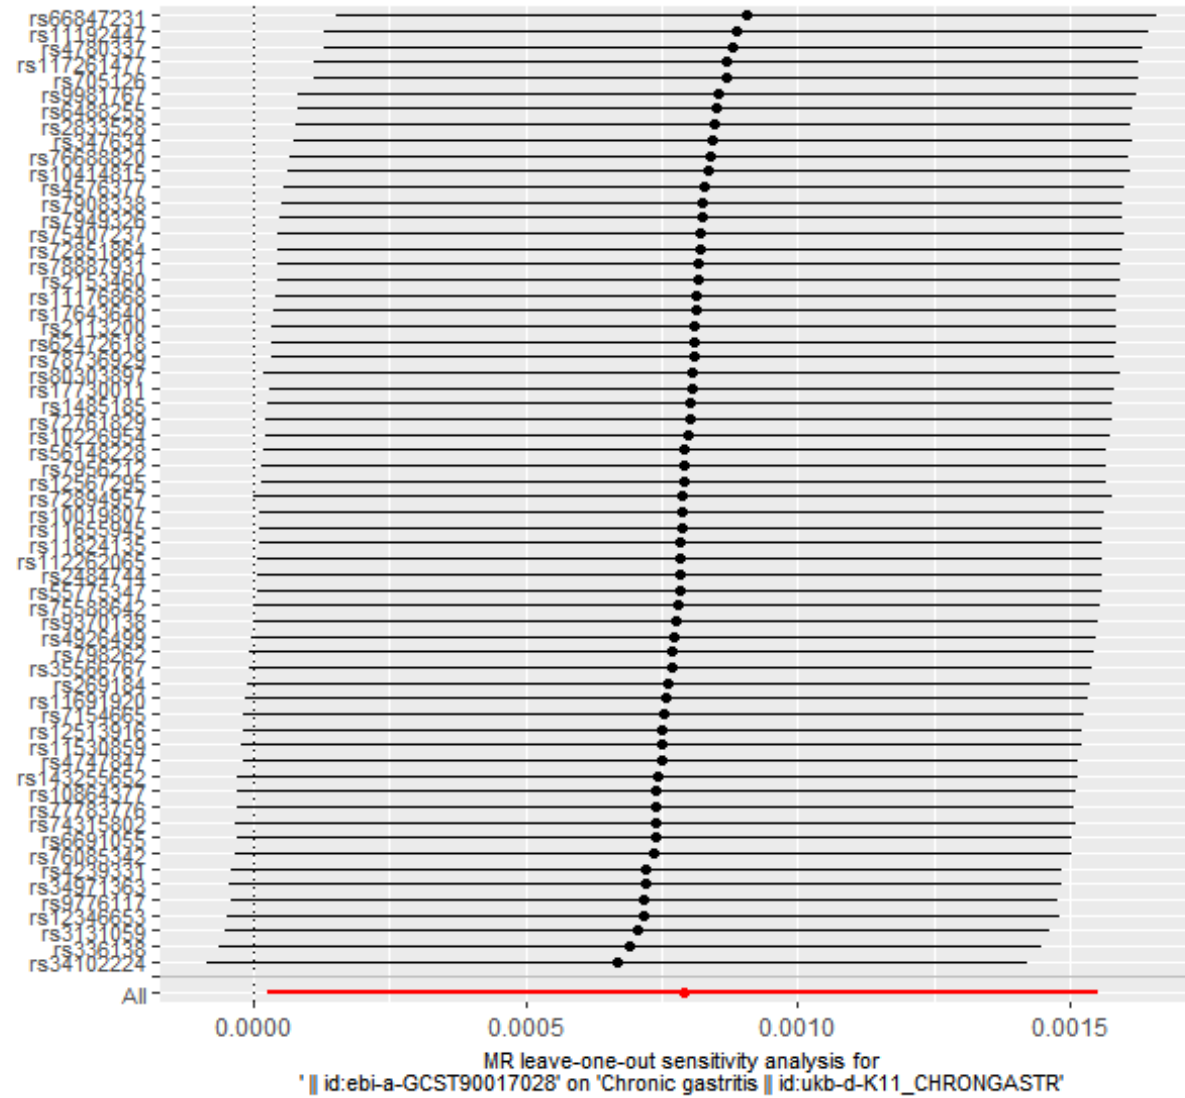

MR Method

- Inverse variance weighted
- MR Egger

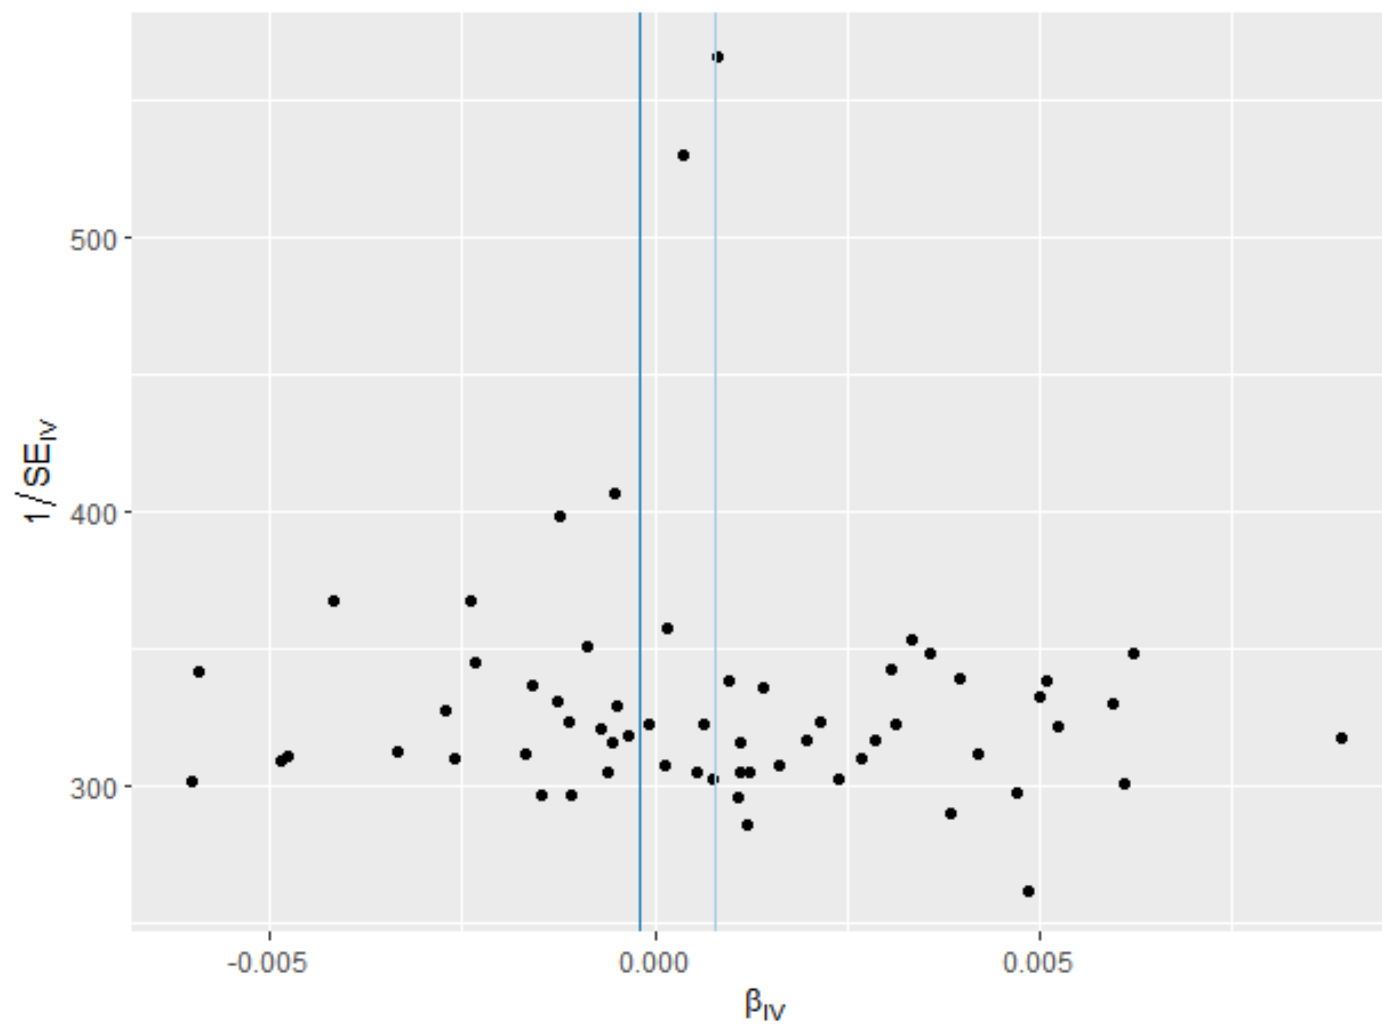

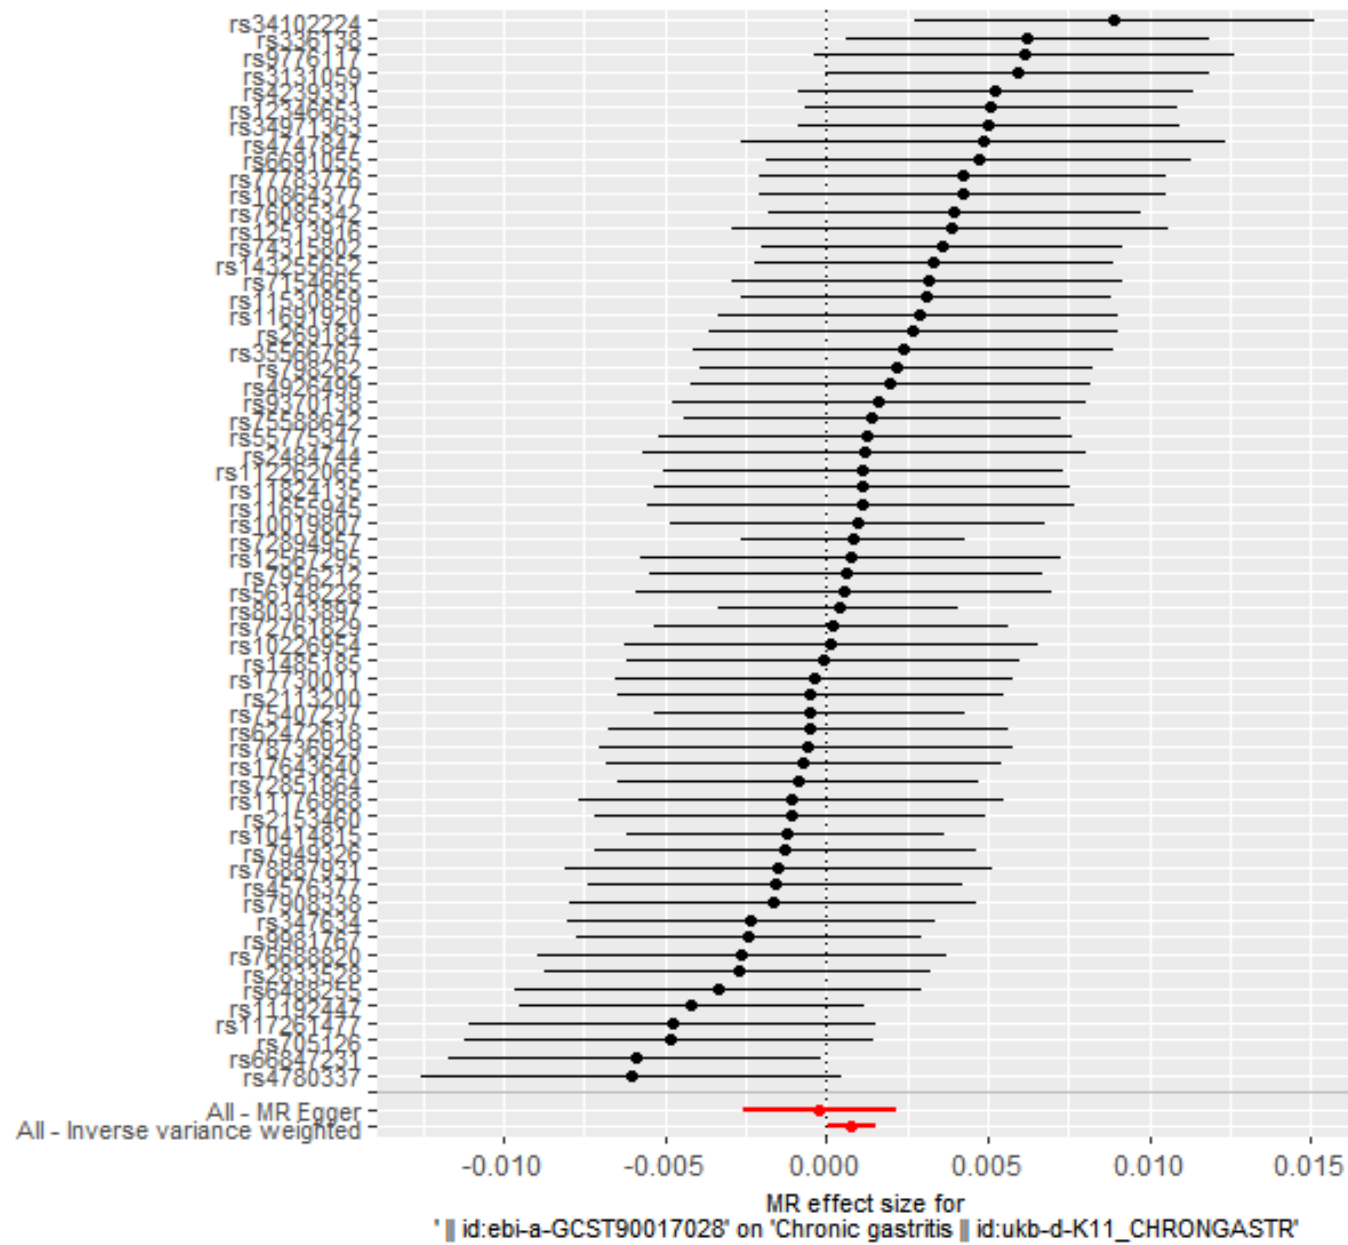

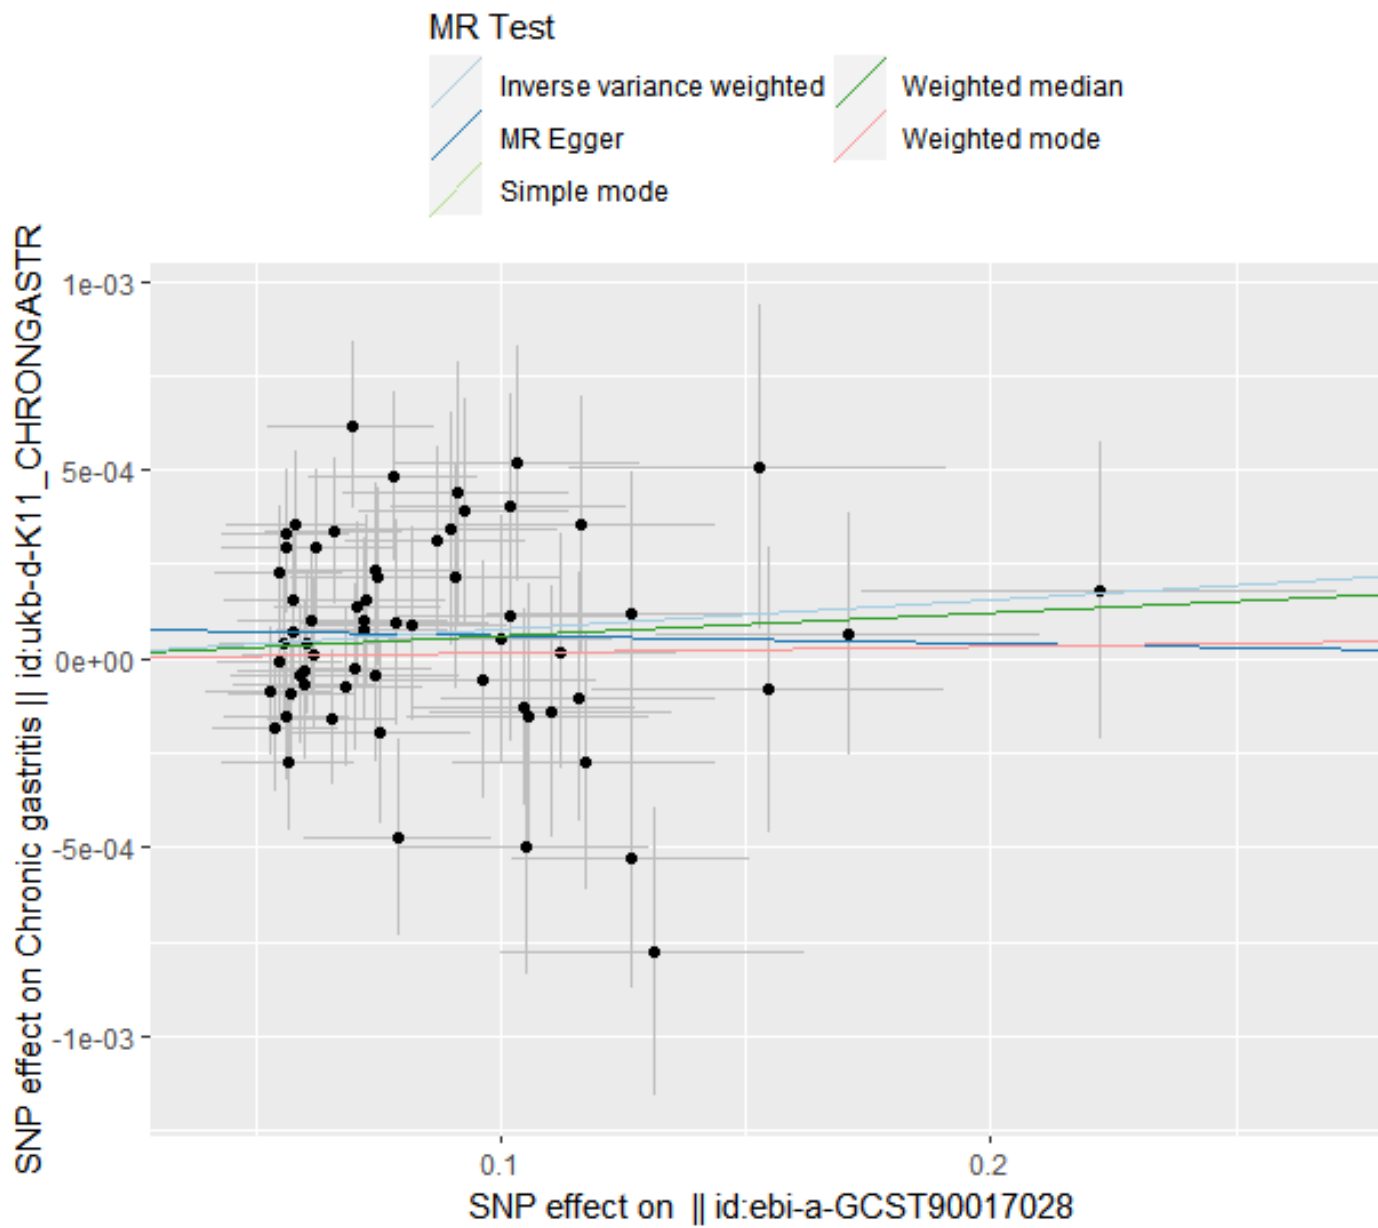

**Figure 66** Leave-one-out analysis, funnel plot, MR effect size and scatter plot for gut microbiota abundance (genus *Peptococcus* id.2037) on chronic gastritis

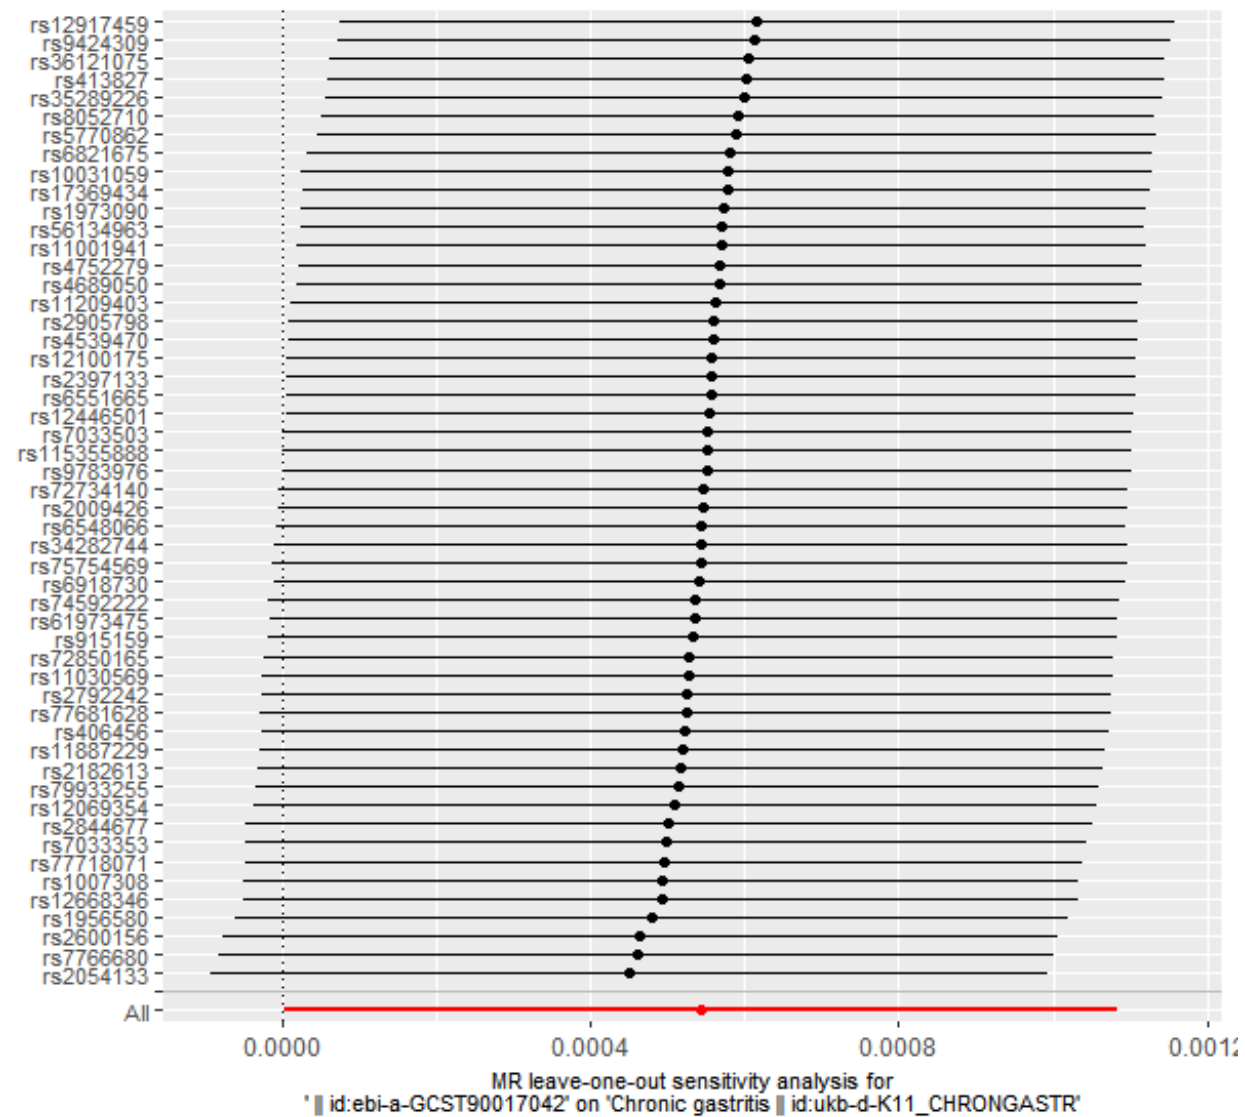

MR Method

- Inverse variance weighted
- MR Egger

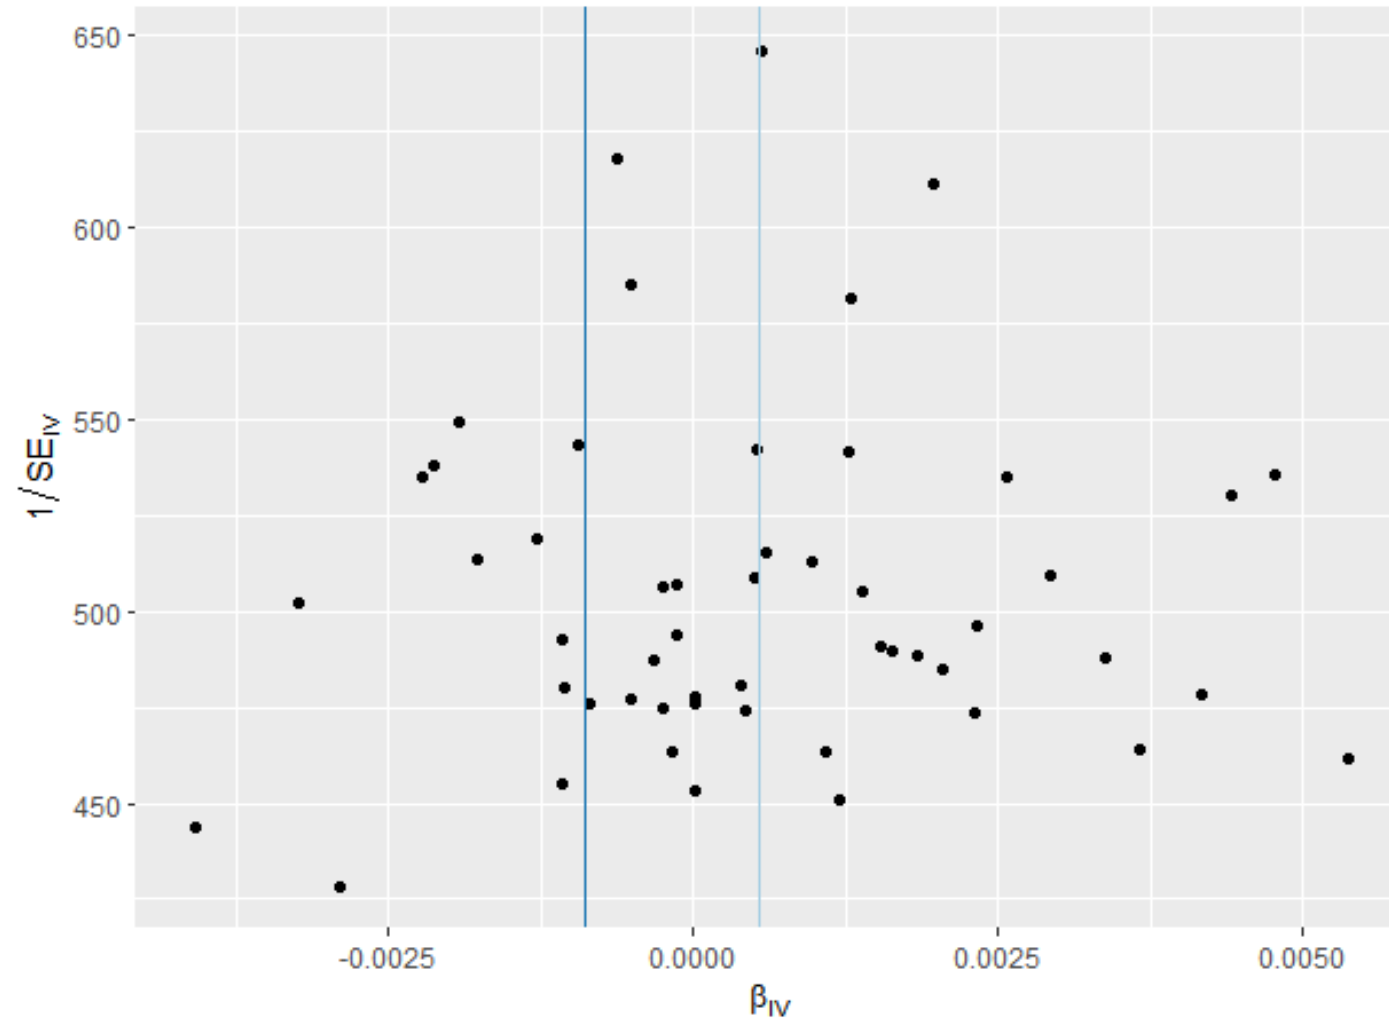

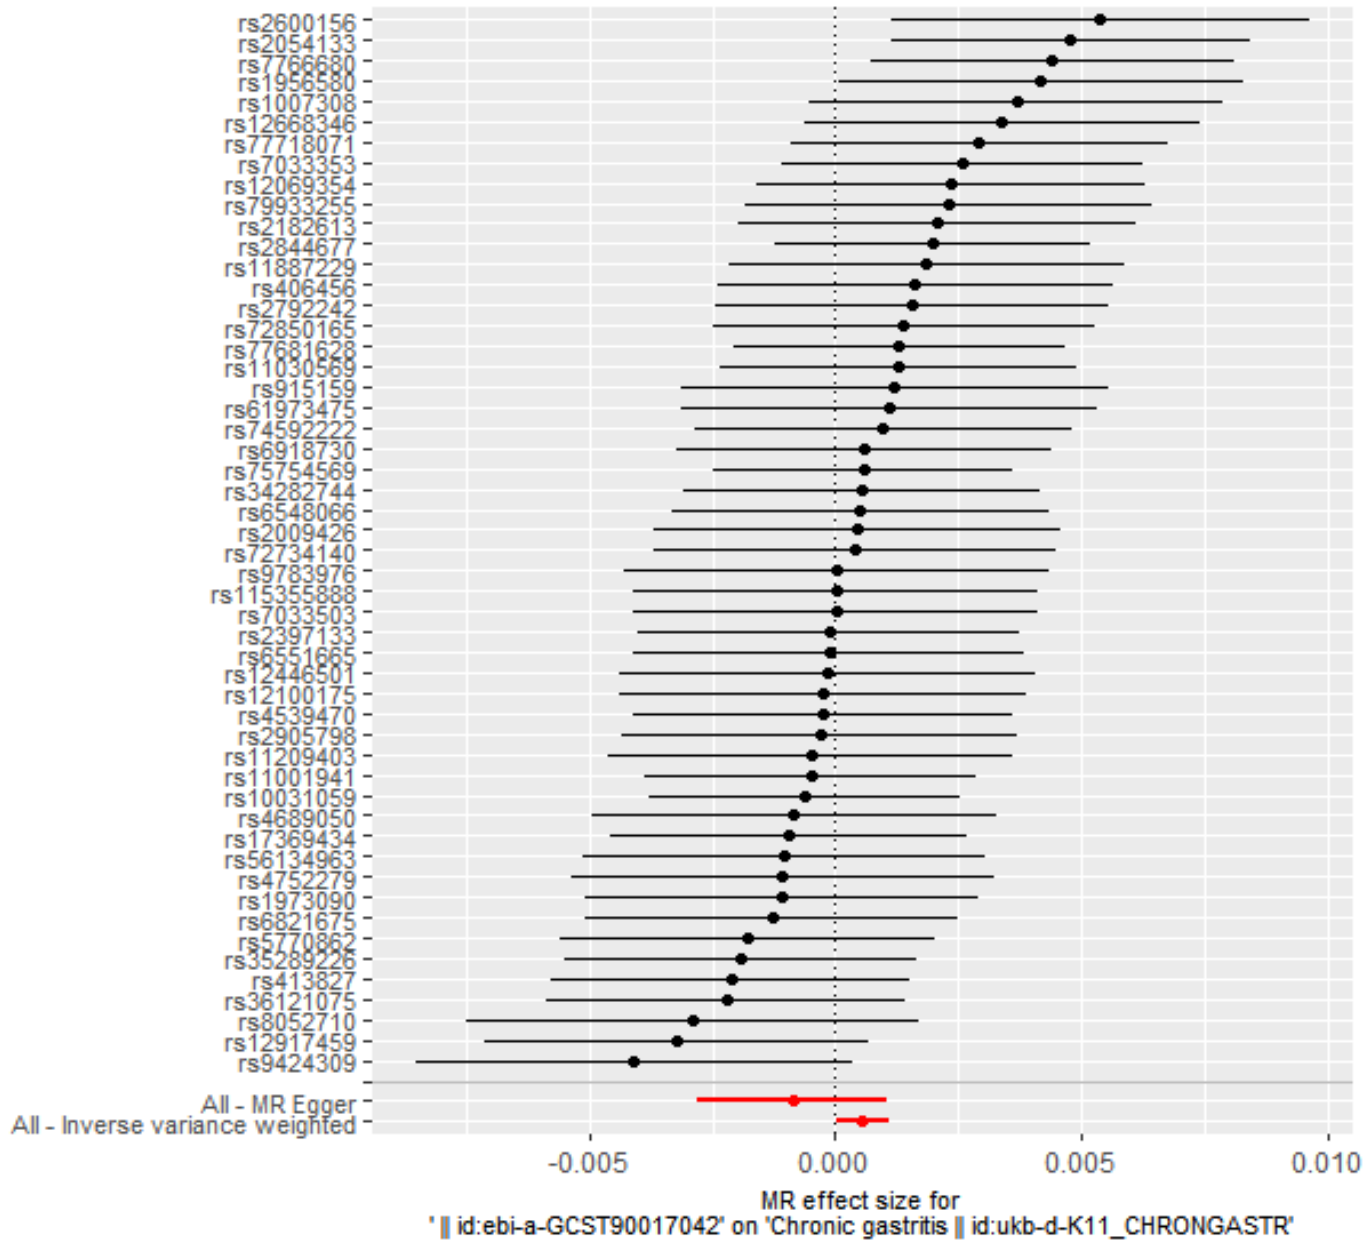

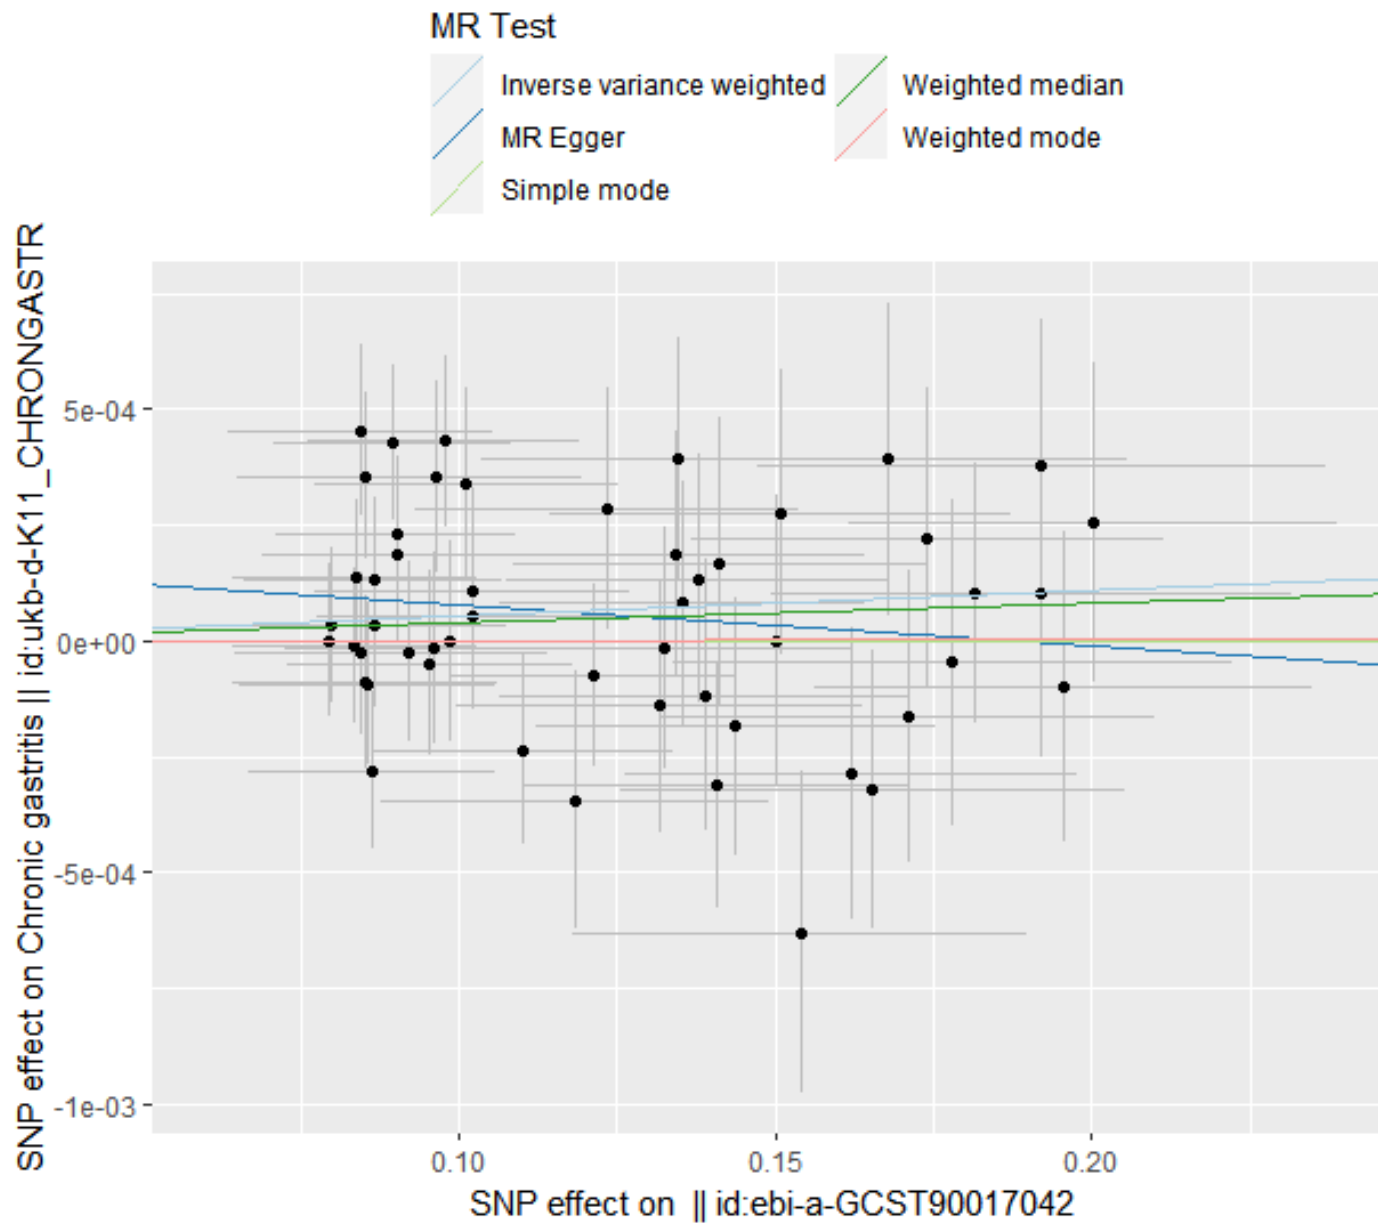



**Figure 67** Leave-one-out analysis, funnel plot, MR effect size and scatter plot for gut microbiota abundance (genus *Prevotella* id.11182) on chronic gastritis

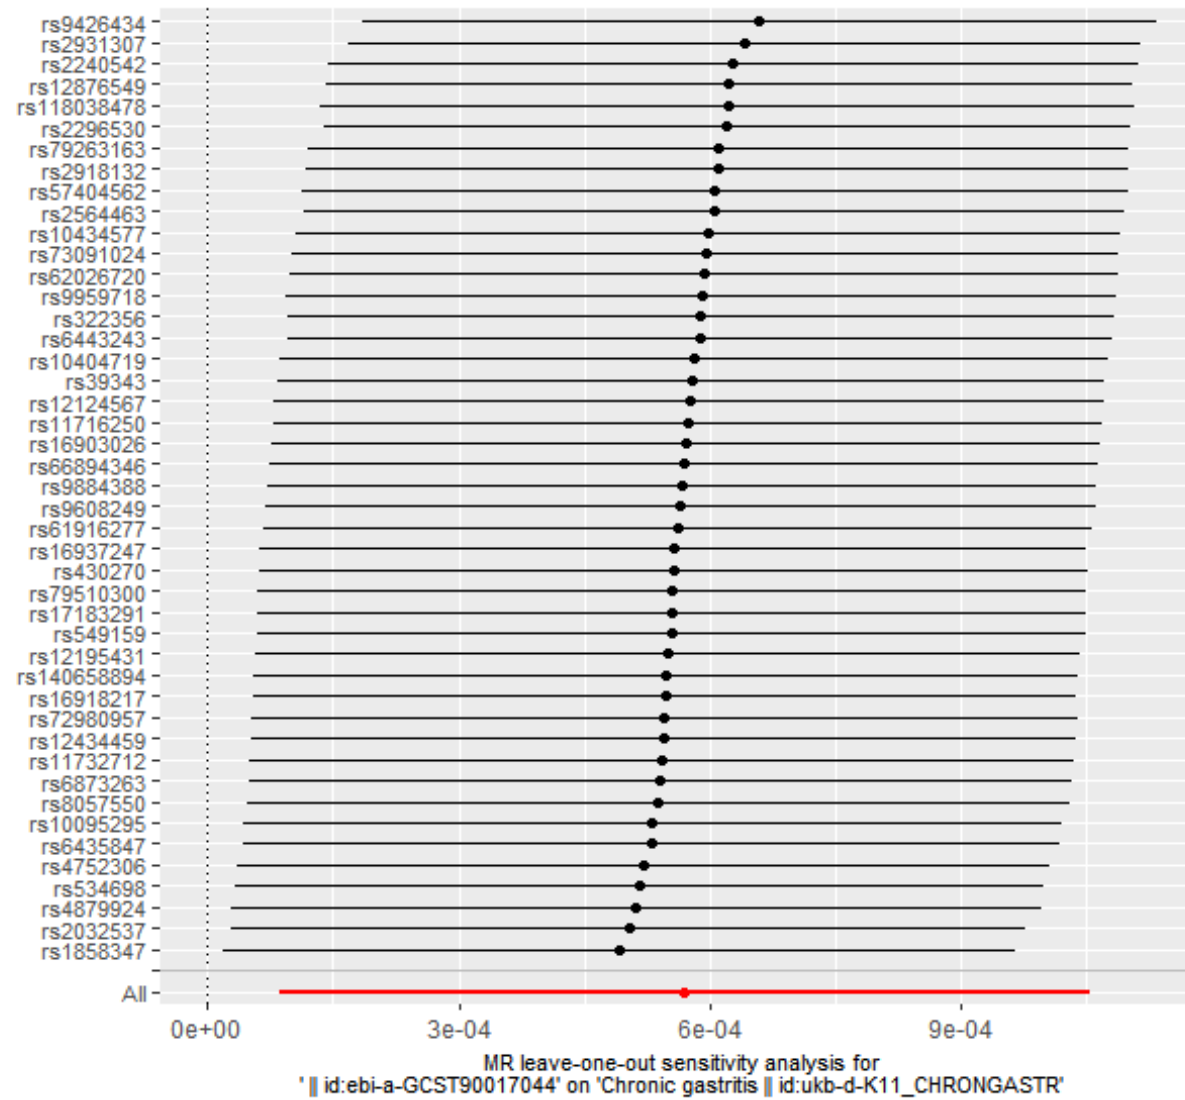

MR Method

- Inverse variance weighted
- MR Egger

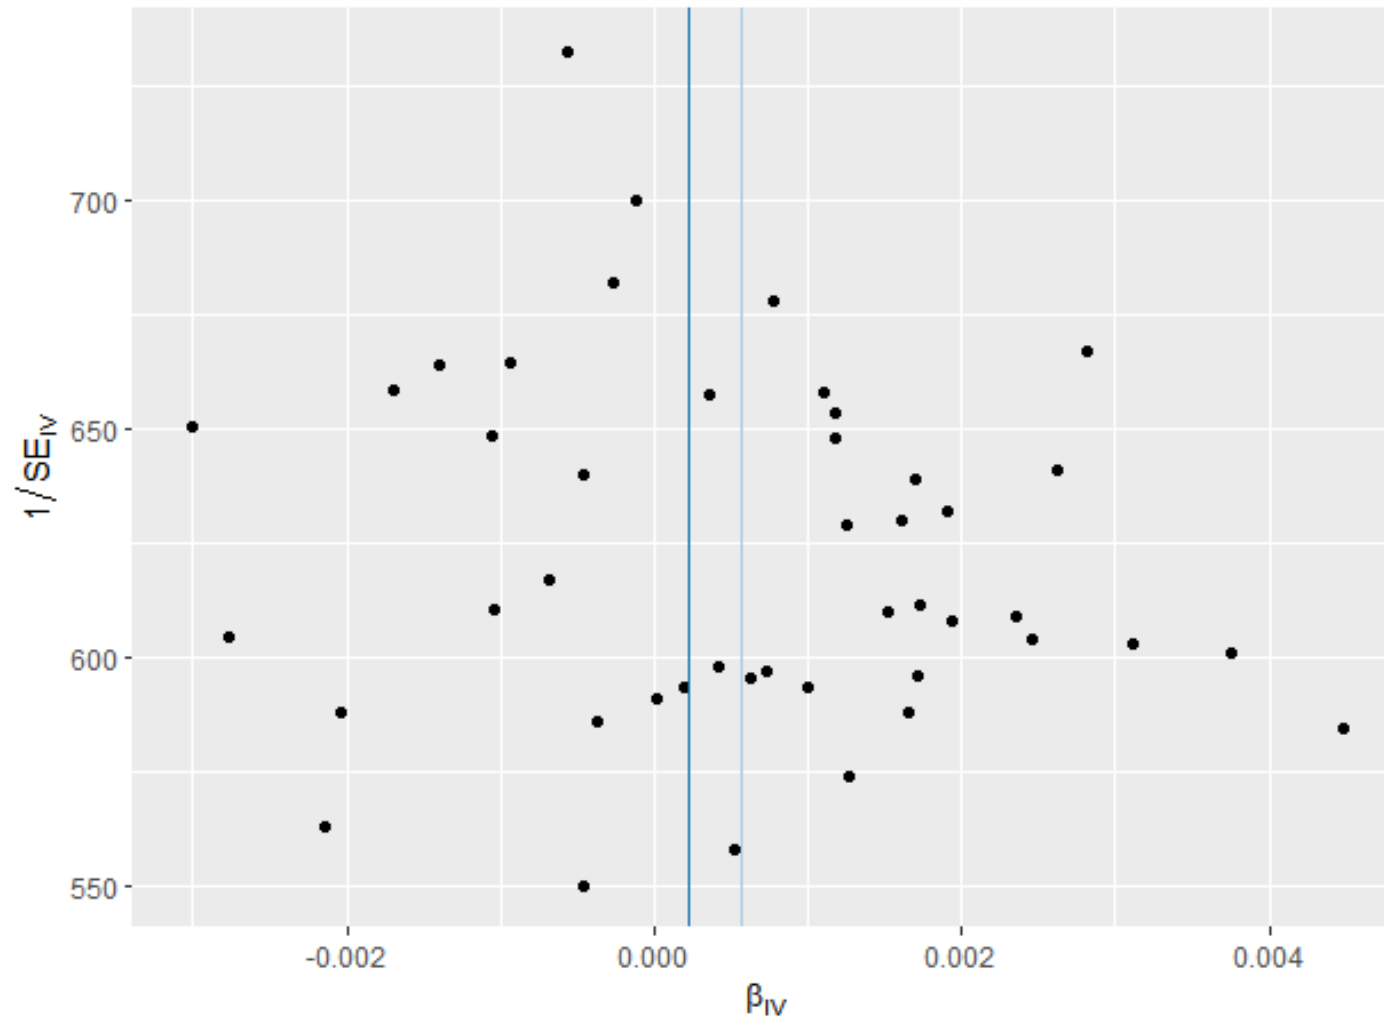

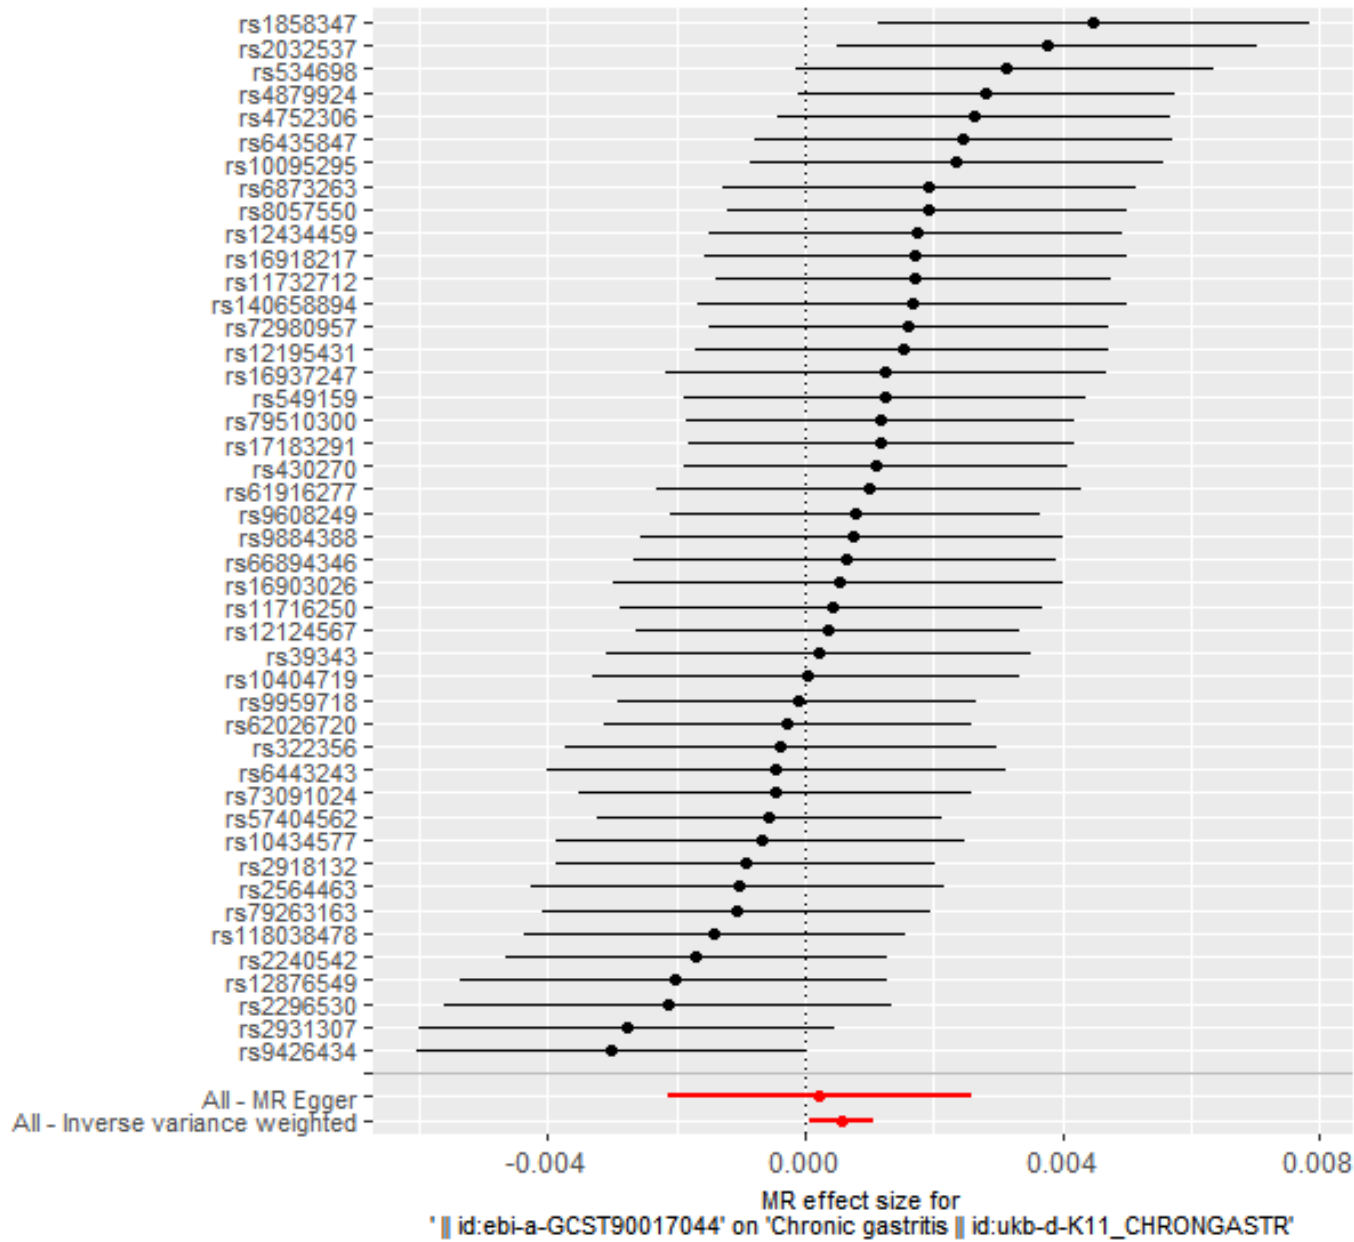

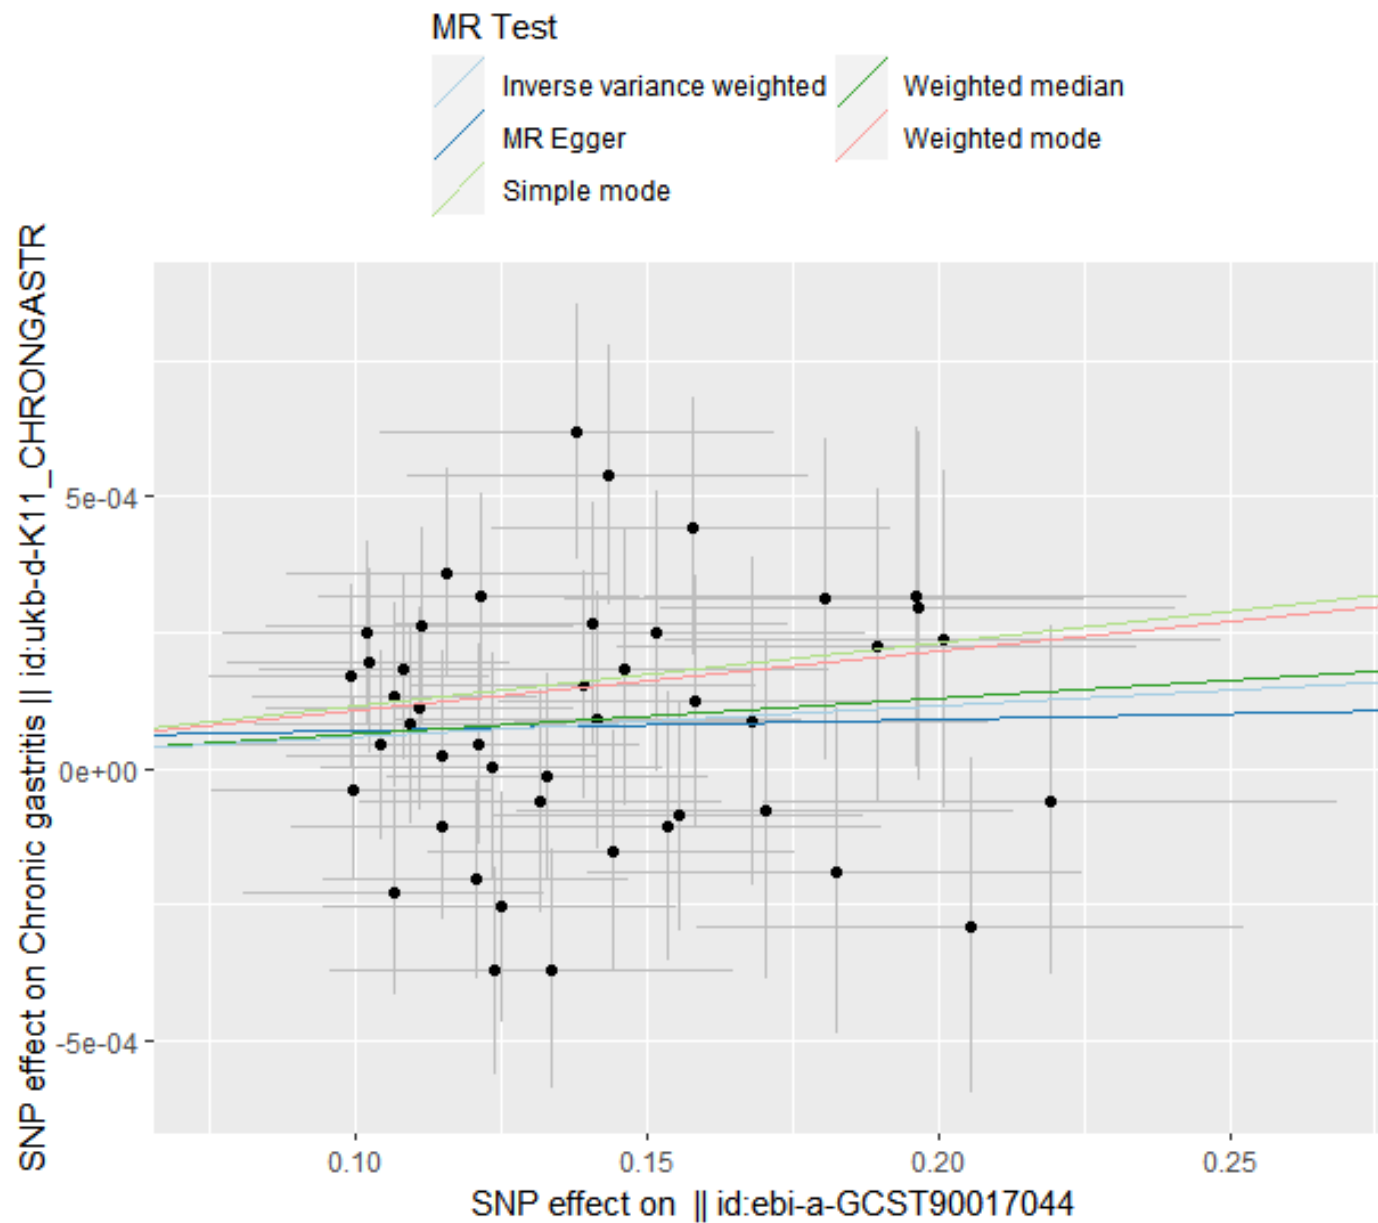

**Figure 68** Leave-one-out analysis, funnel plot, MR effect size and scatter plot for gut microbiota abundance (genus Ruminococcaceae UCG010 id.11367) on chronic gastritis

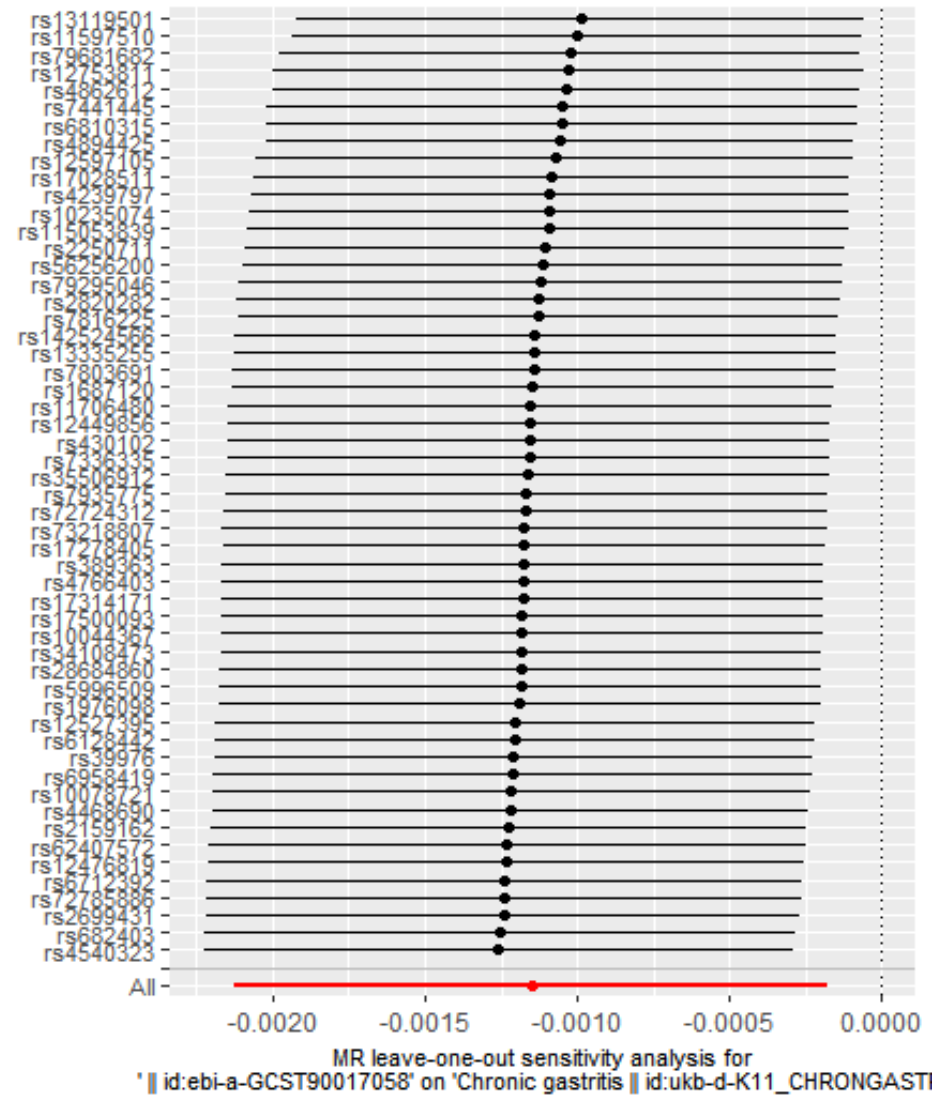

MR Method

- Inverse variance weighted
- MR Egger

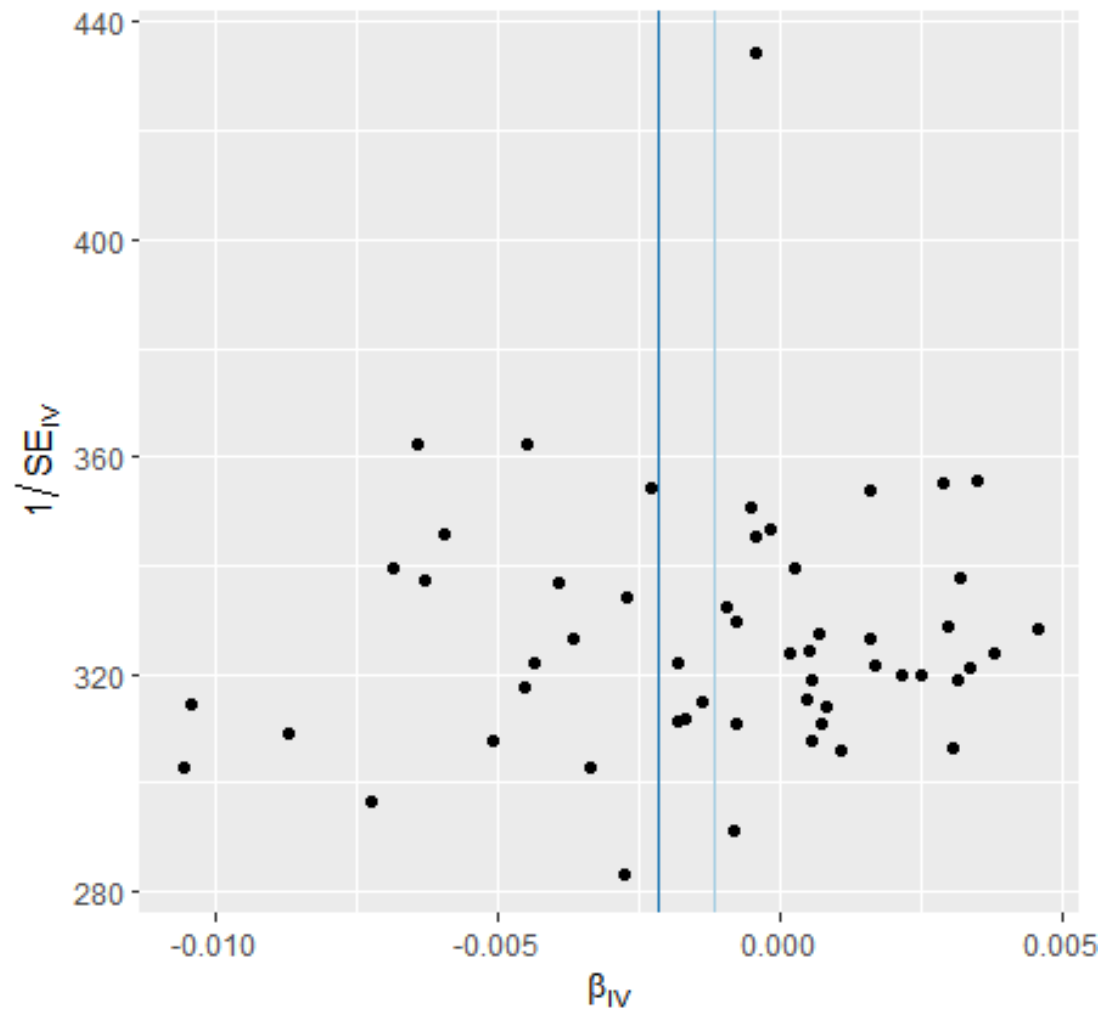

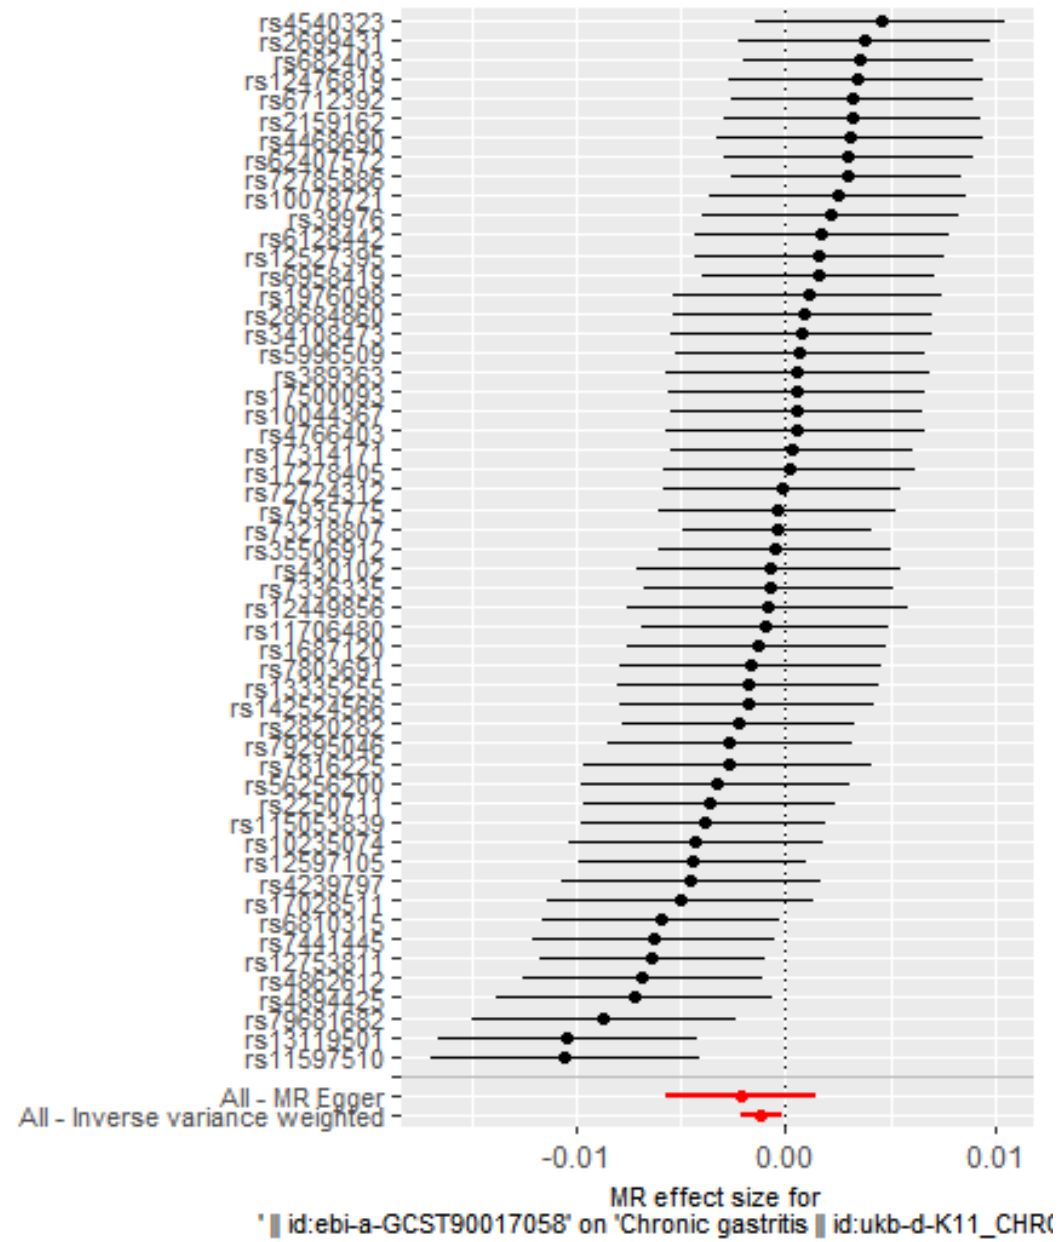

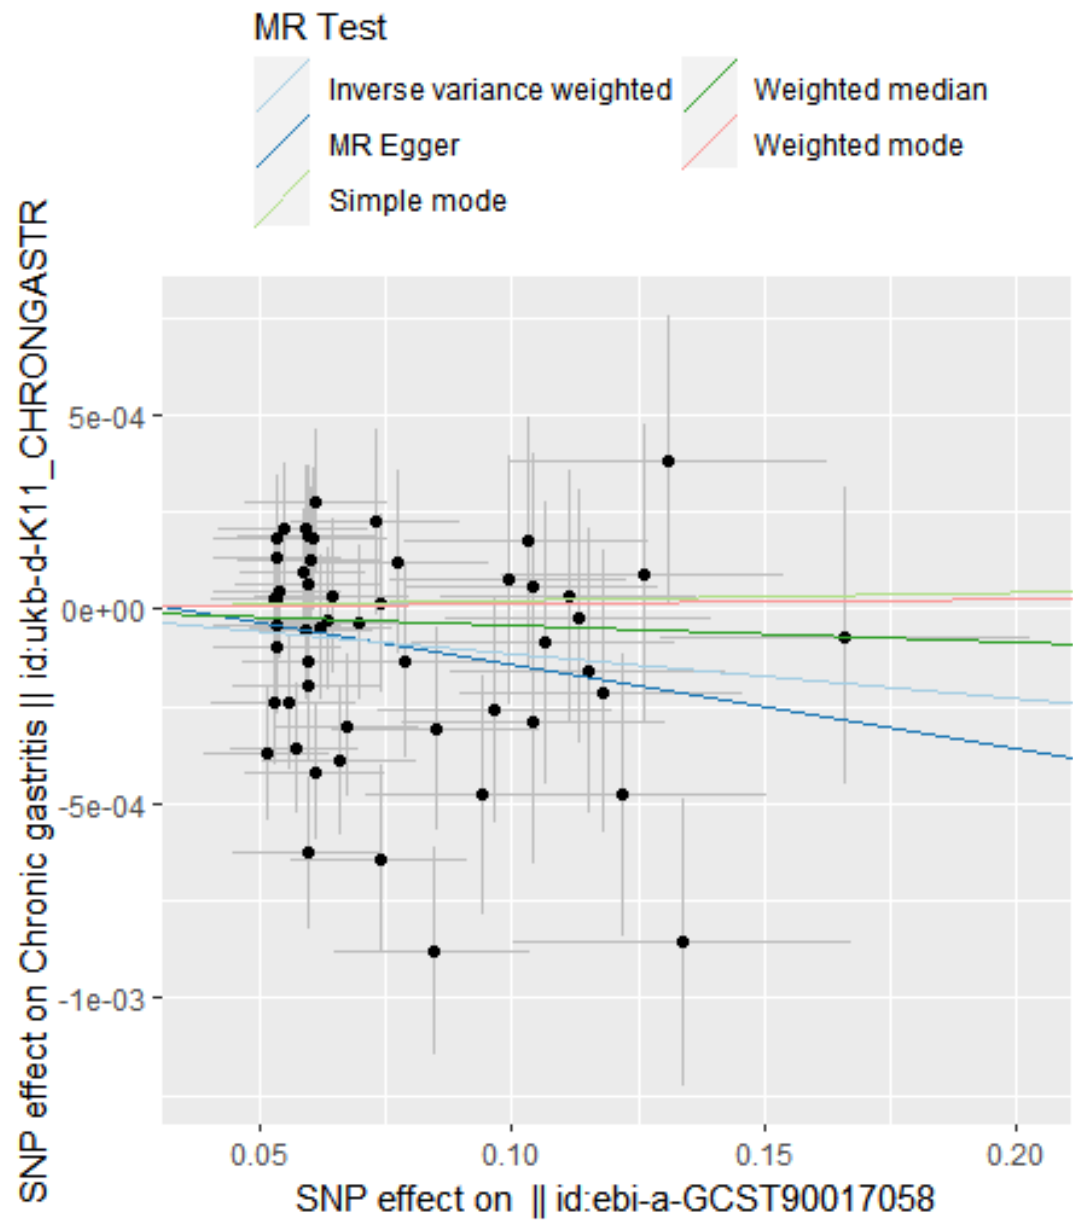



**Figure 69** Leave-one-out analysis, funnel plot, MR effect size and scatter plot for gut microbiota abundance (genus Victivallis id.2256) on chronic gastritis

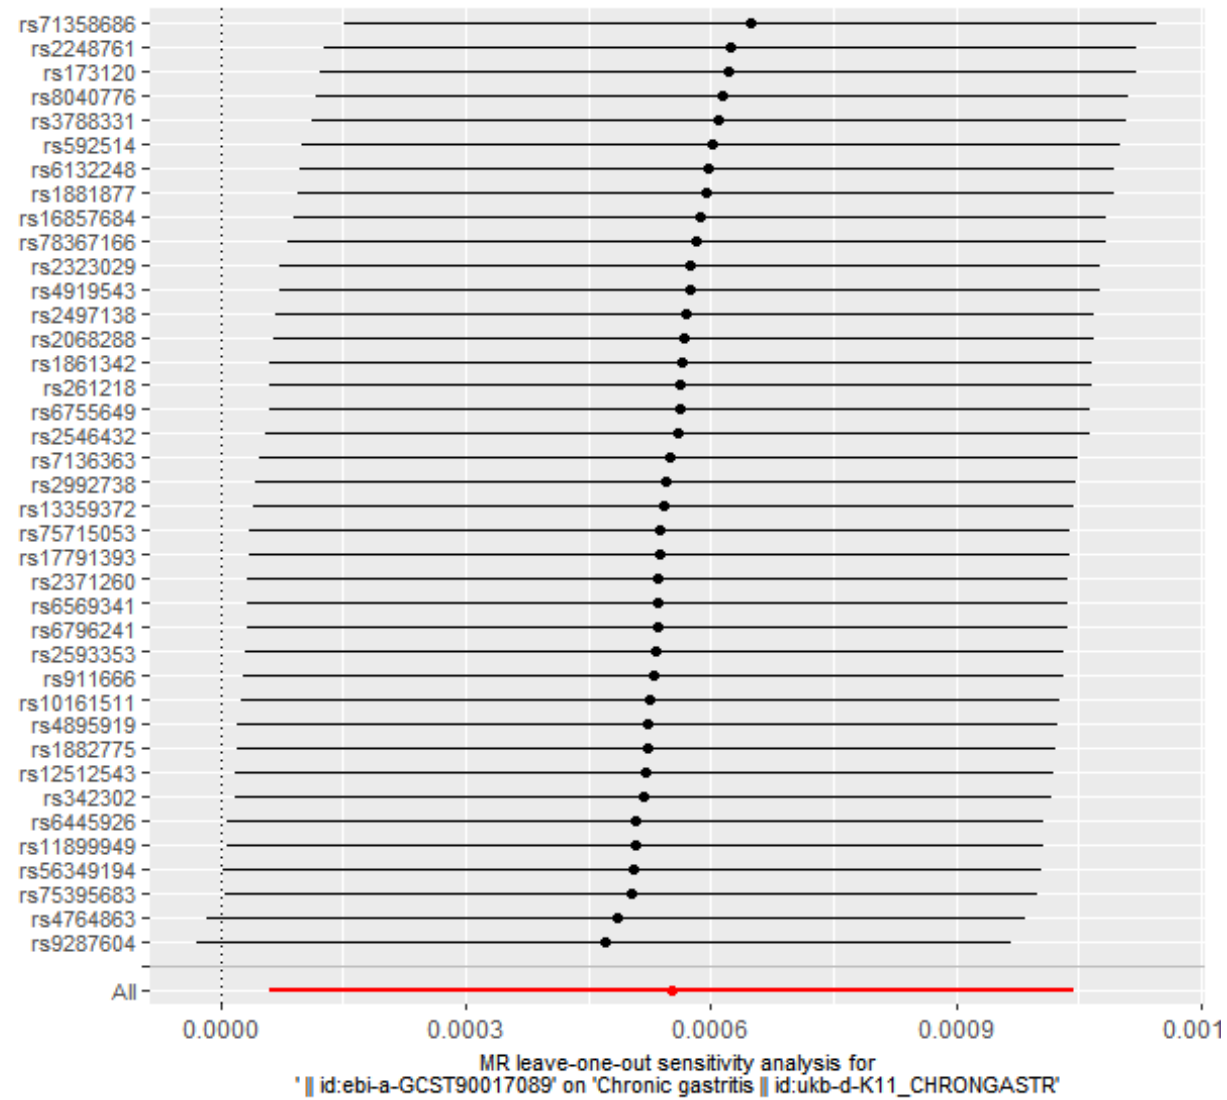

MR Method

- Inverse variance weighted
- MR Egger

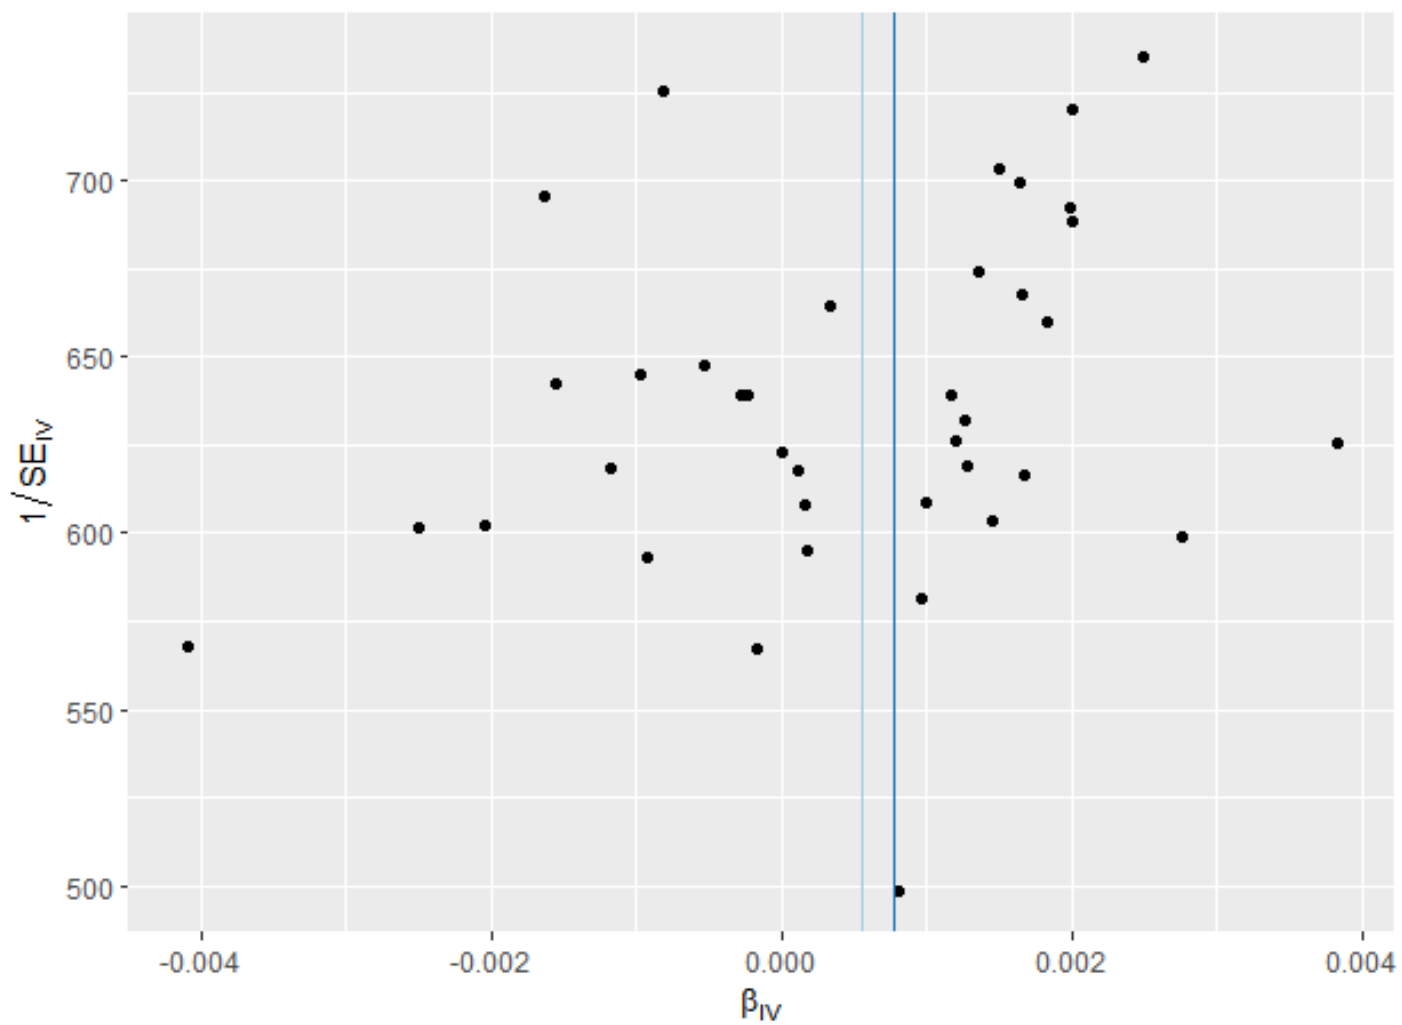

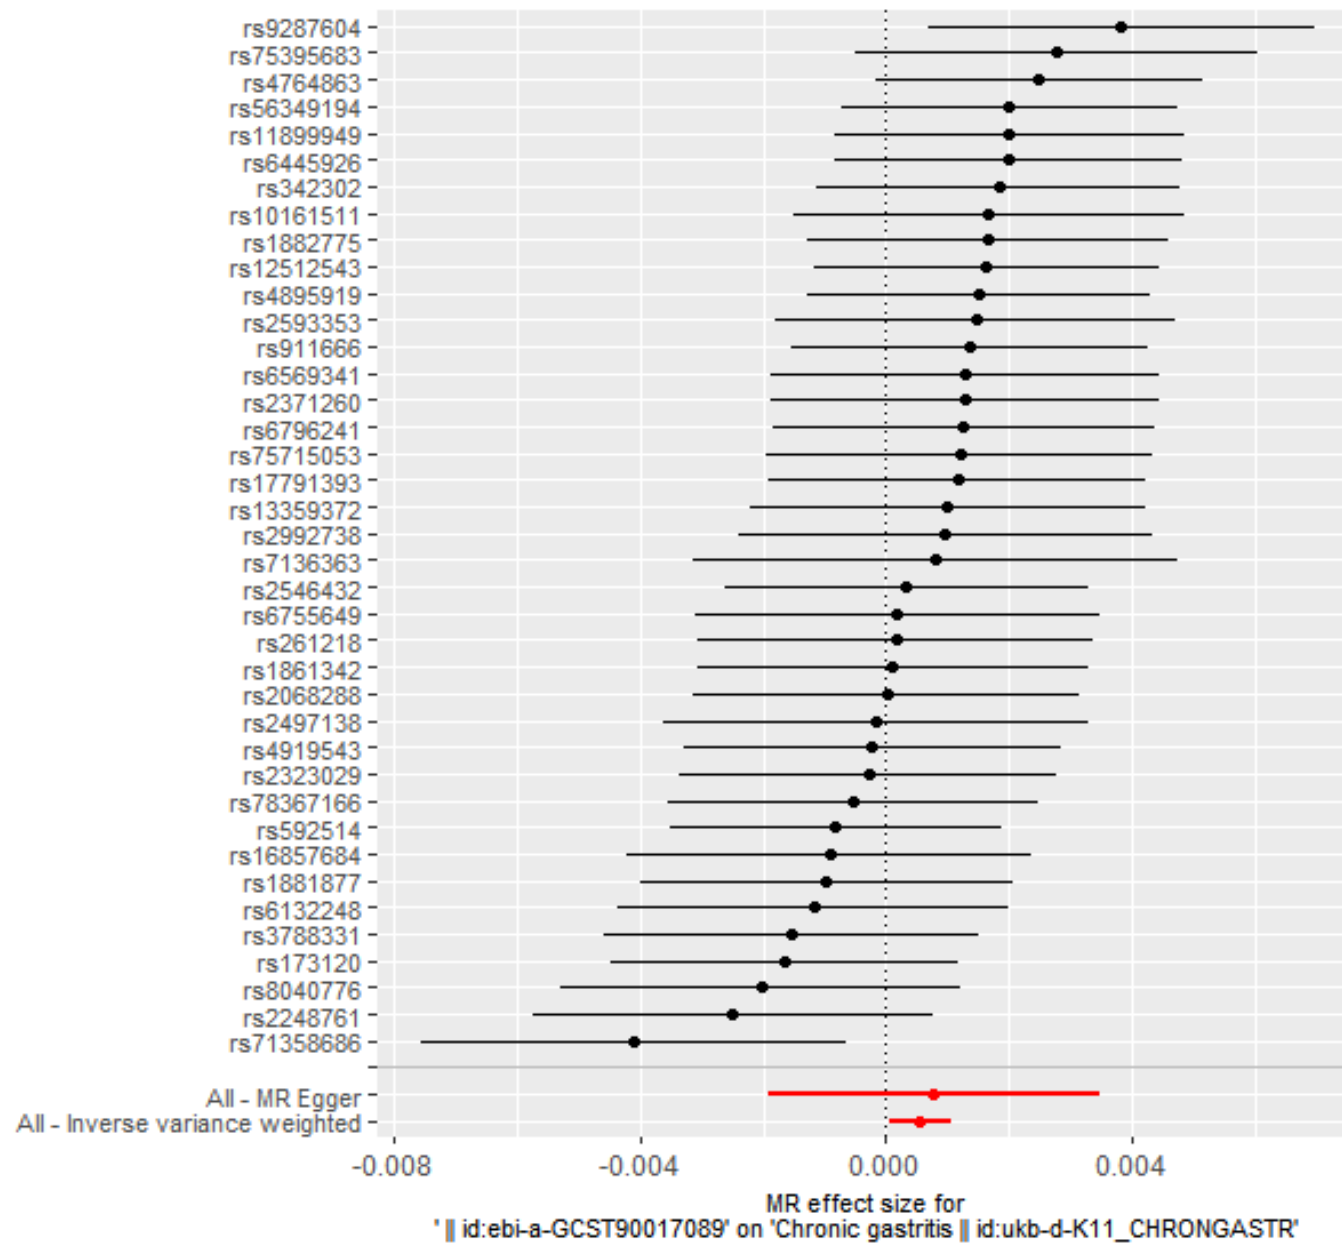

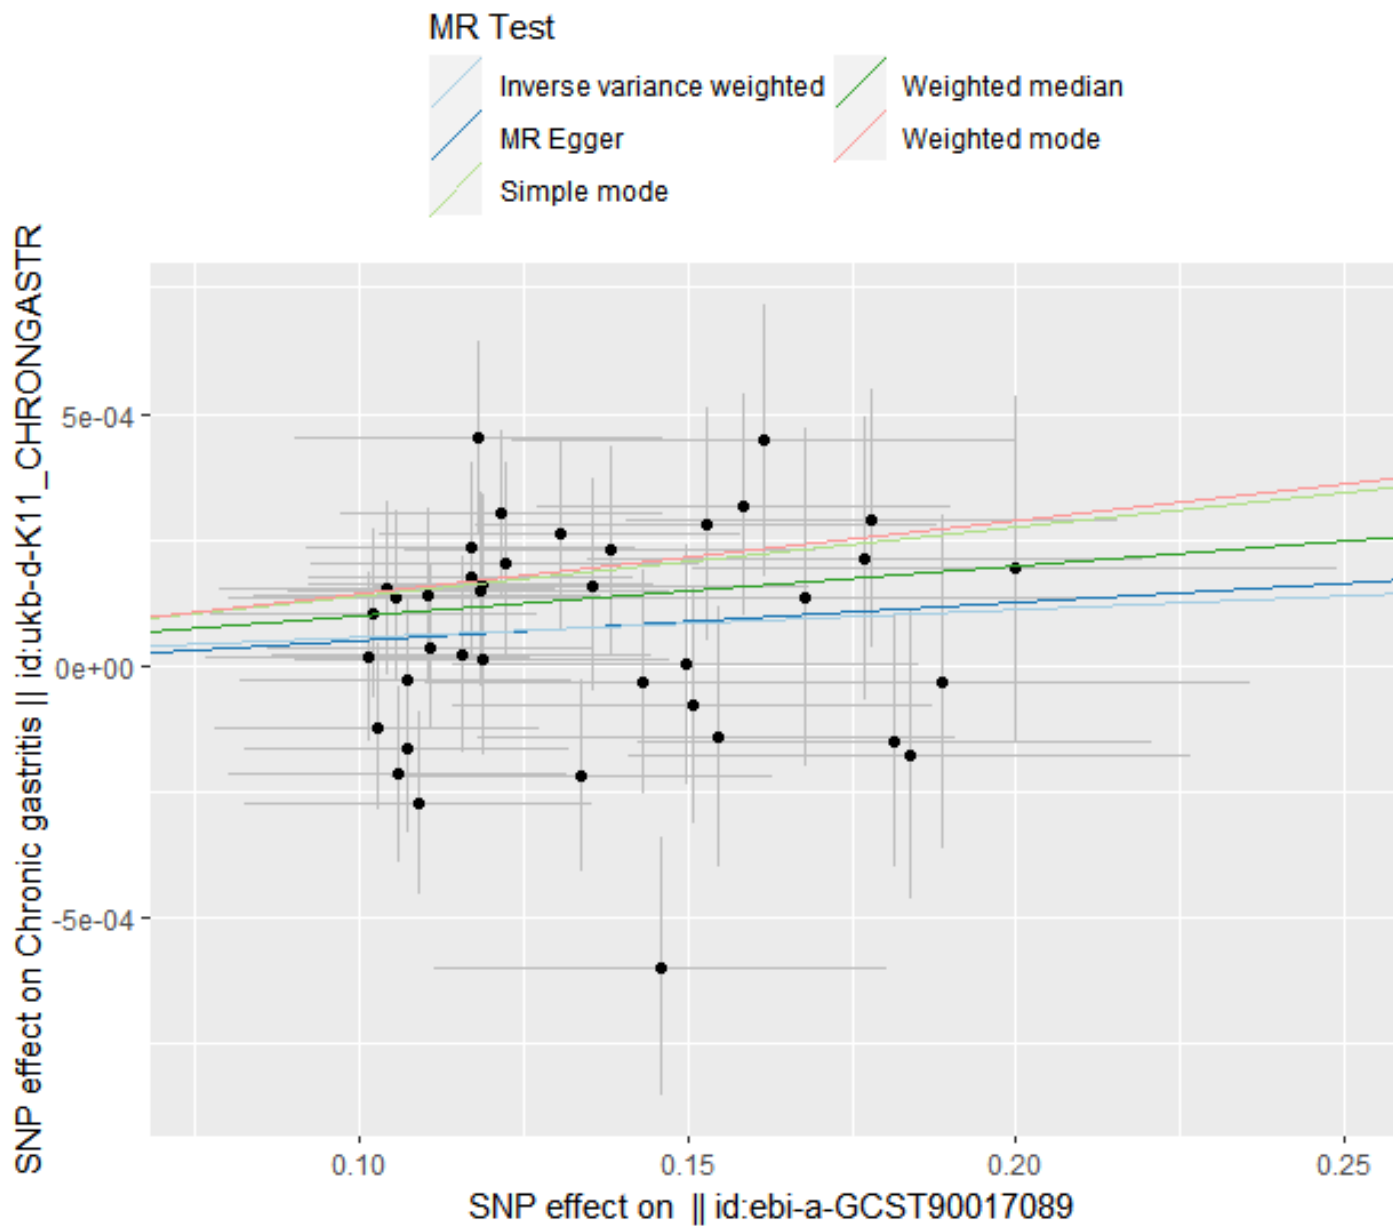

**Figure 70** Leave-one-out analysis, funnel plot, MR effect size and scatter plot for gut microbiota abundance (order Verrucomicrobiales id.4030) on chronic gastritis

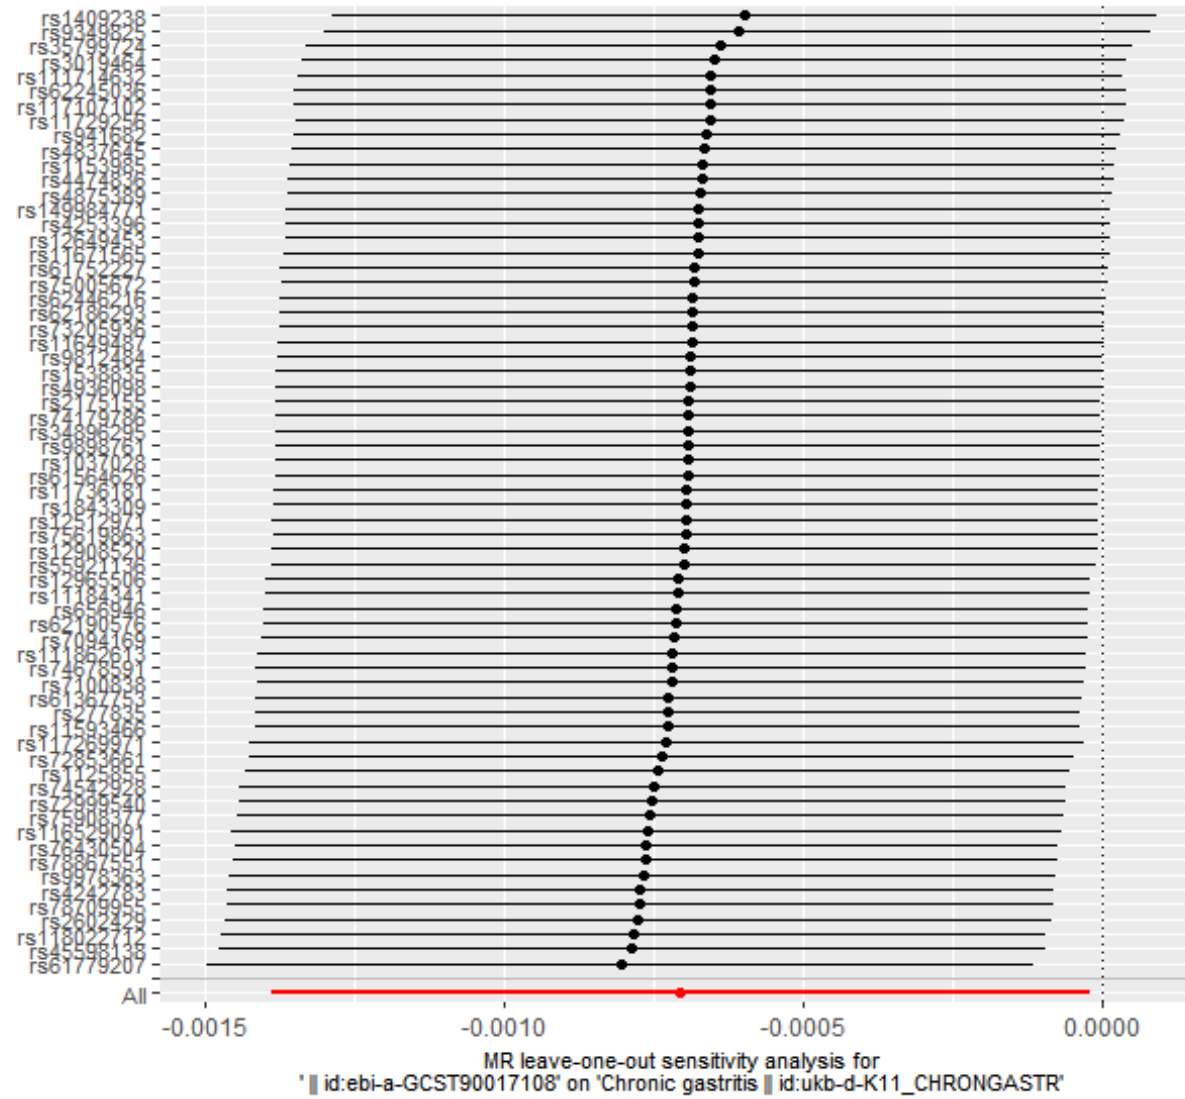

MR Method

- Inverse variance weighted
- MR Egger

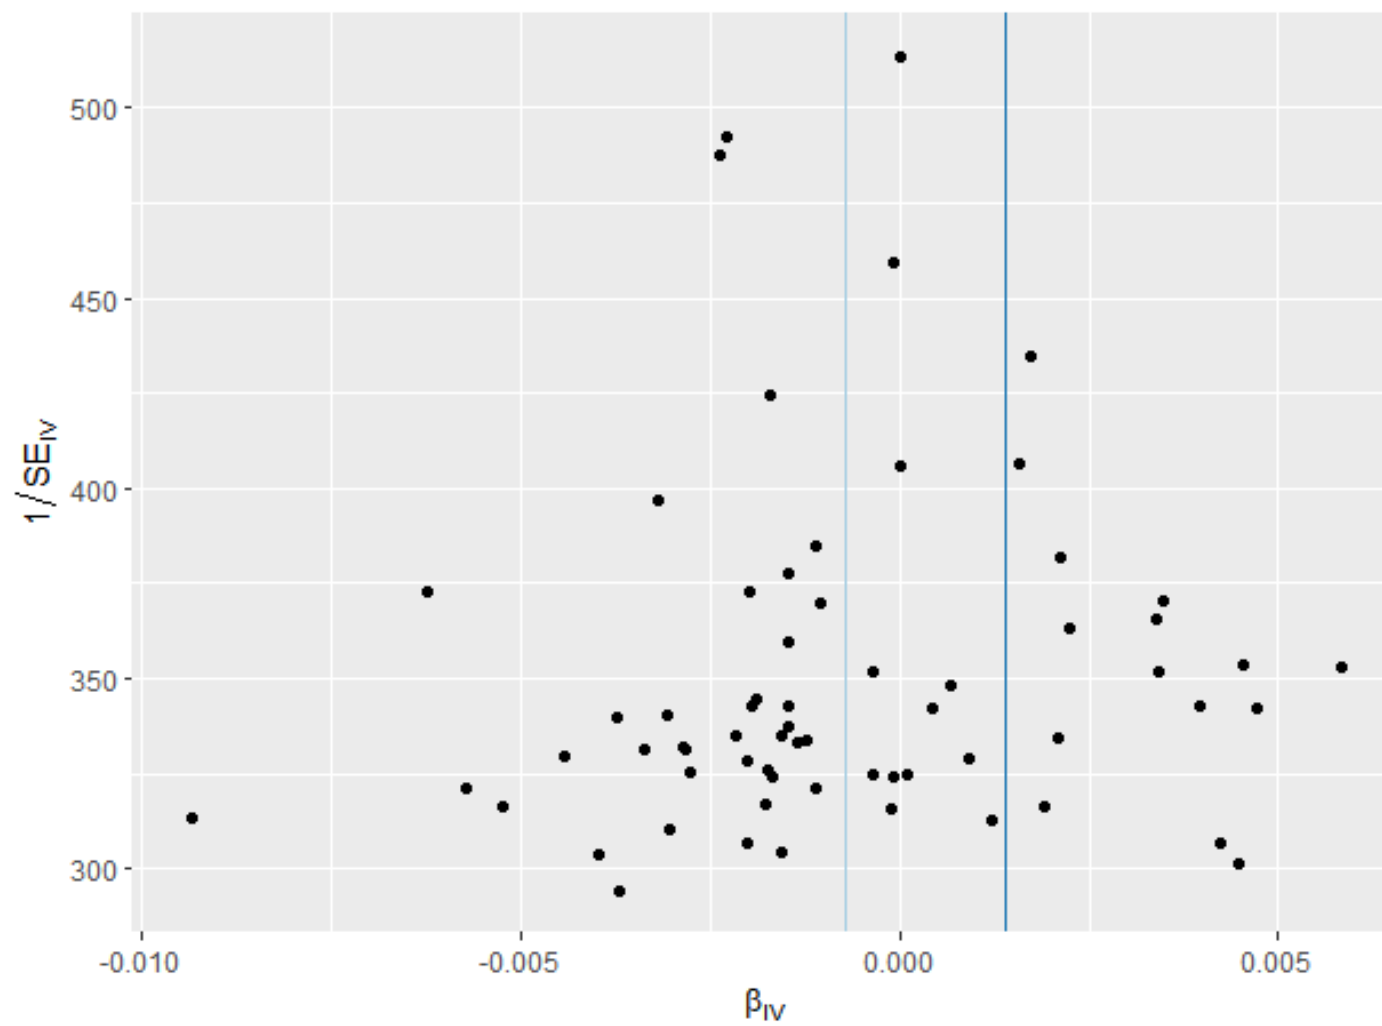

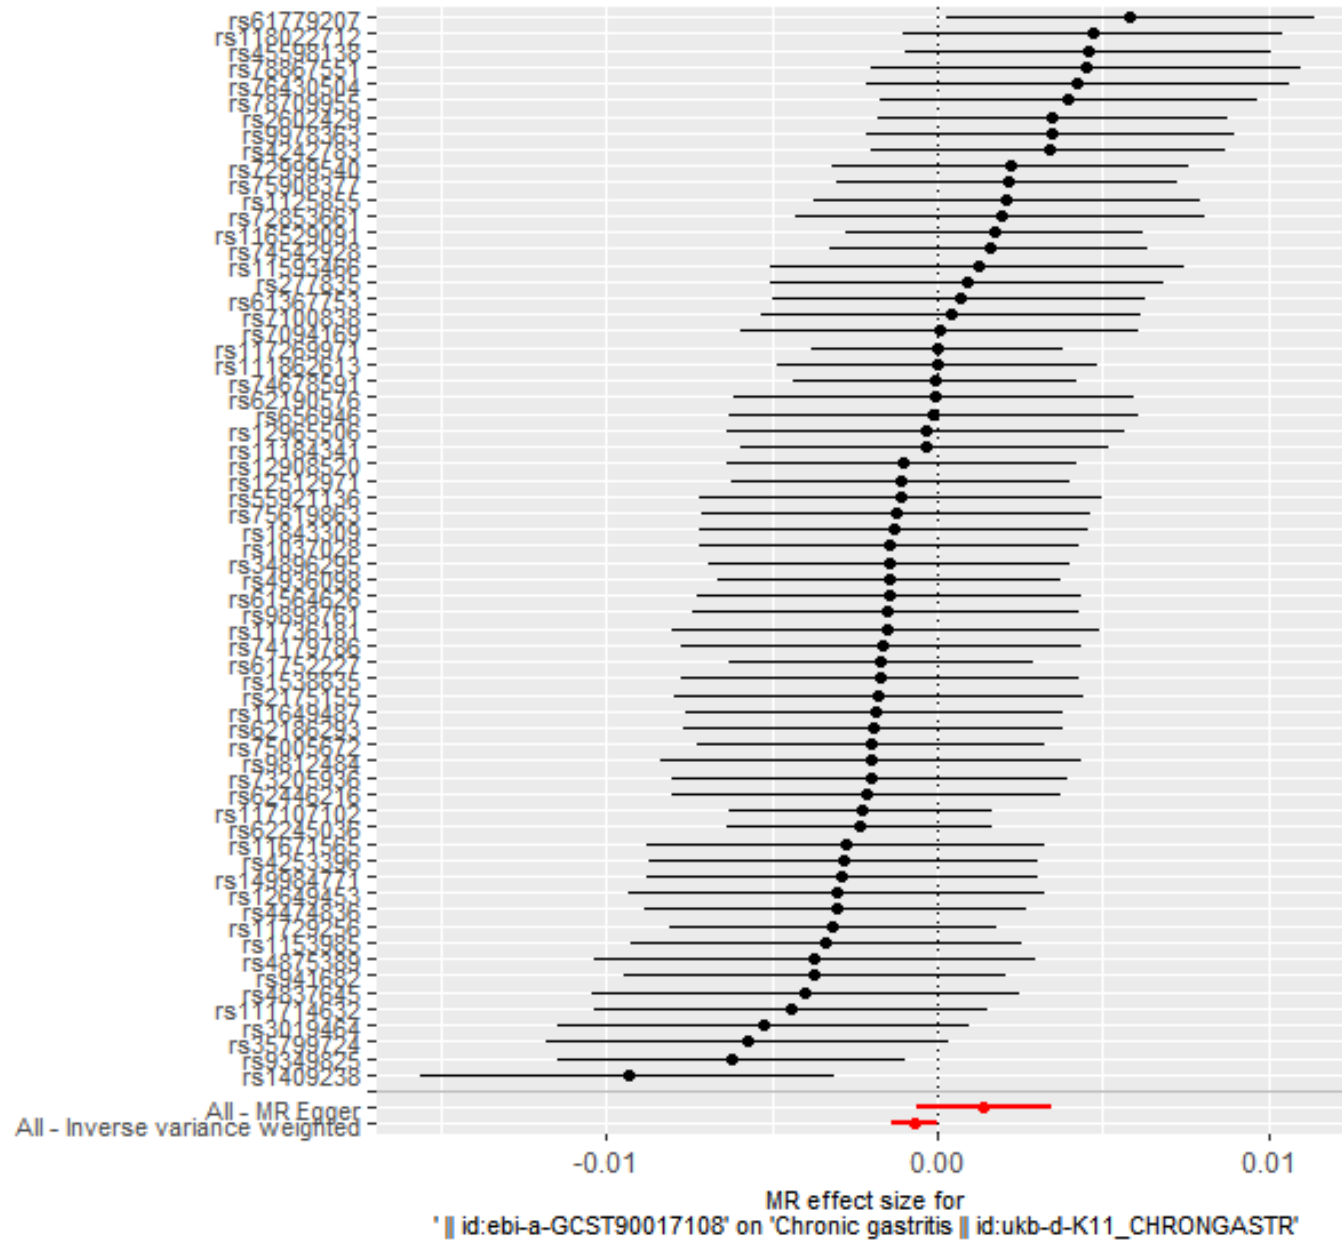

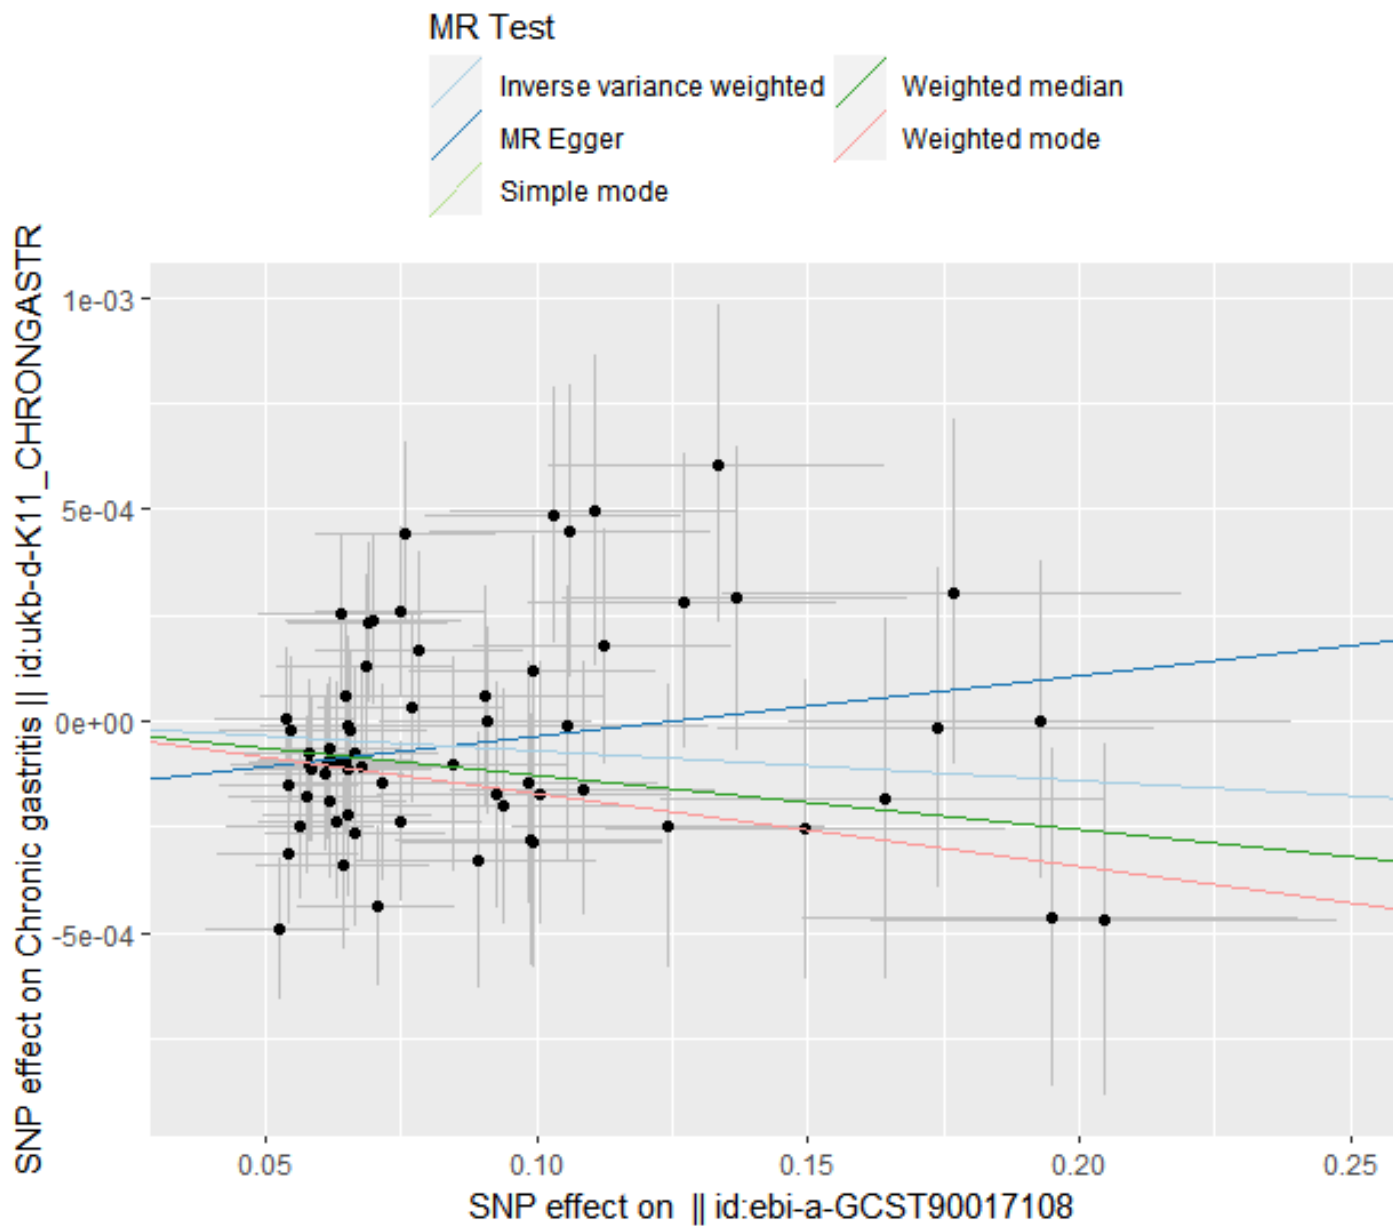



**Figure 71** Leave-one-out analysis, funnel plot, MR effect size and scatter plot for gut microbiota abundance (class Gammaproteobacteria id.3303) on acute gastritis

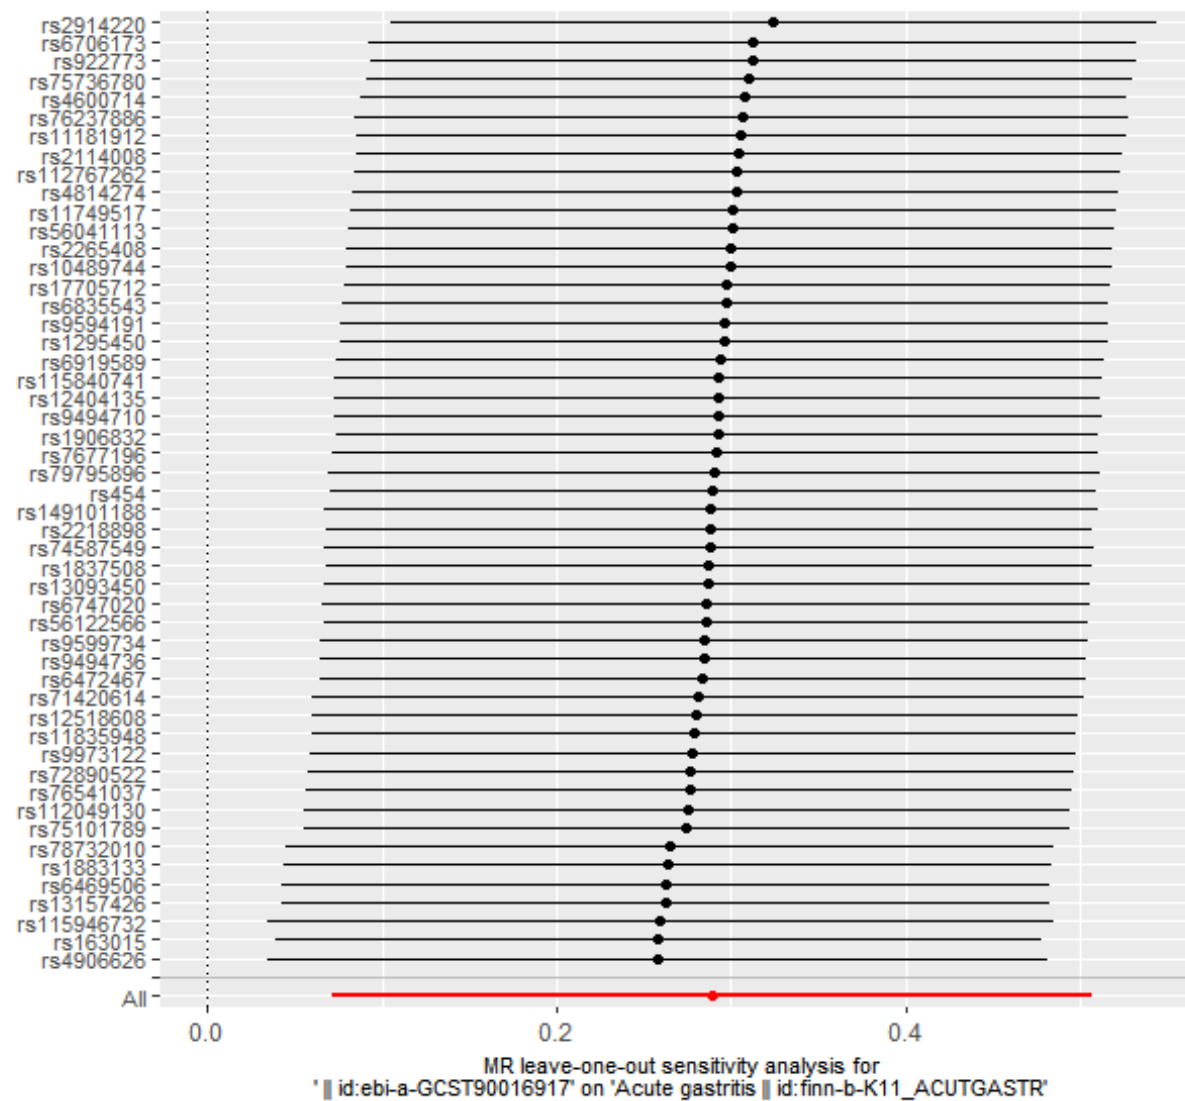

MR Method

- Inverse variance weighted
- MR Egger

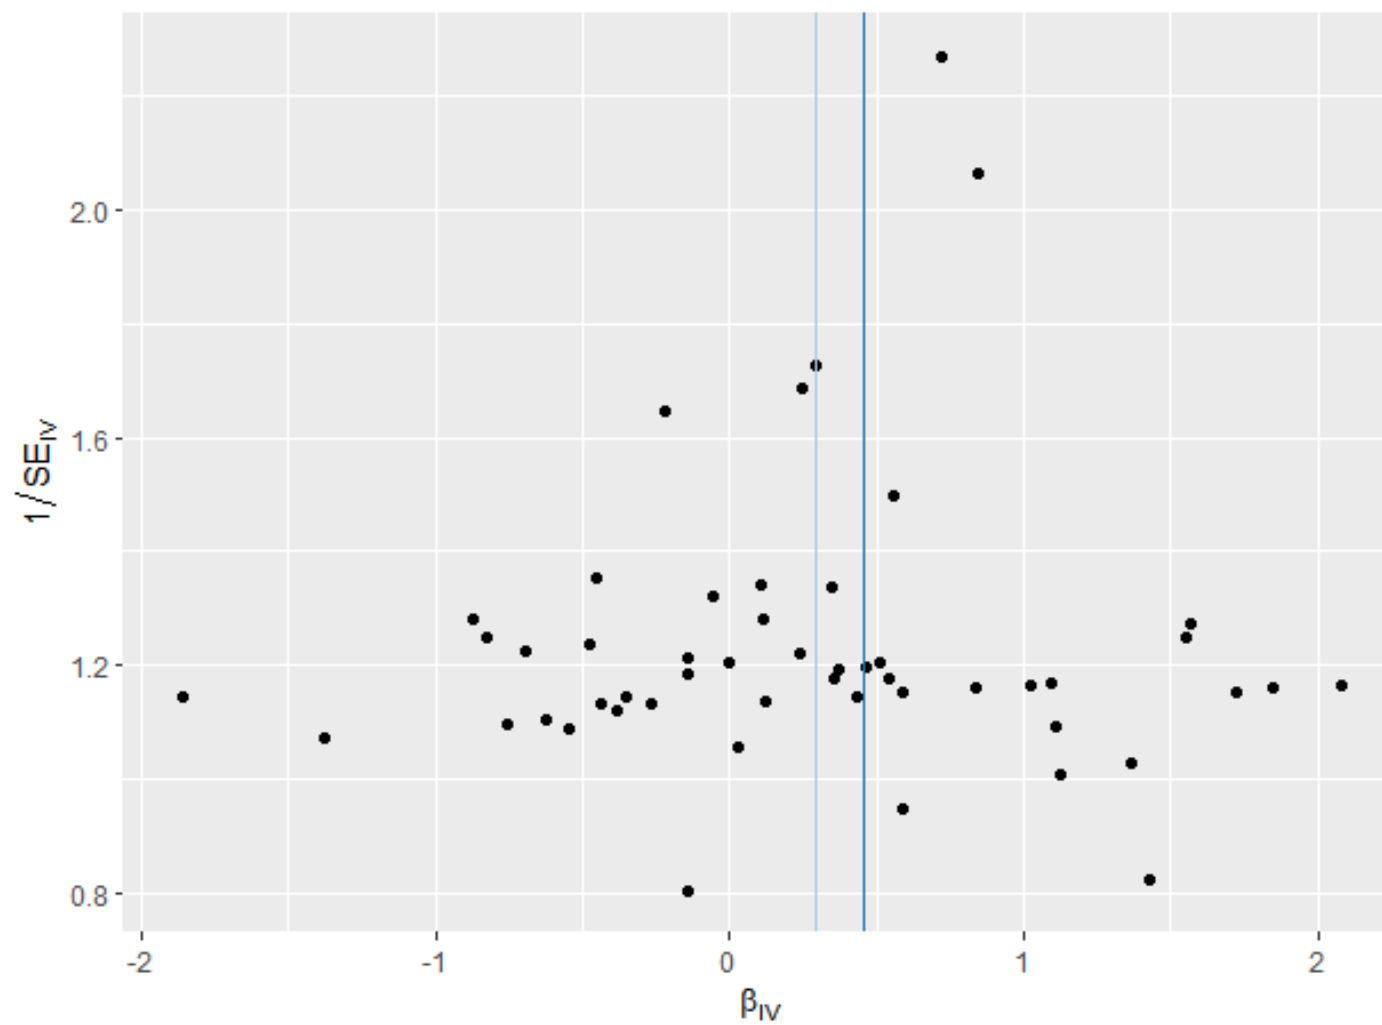

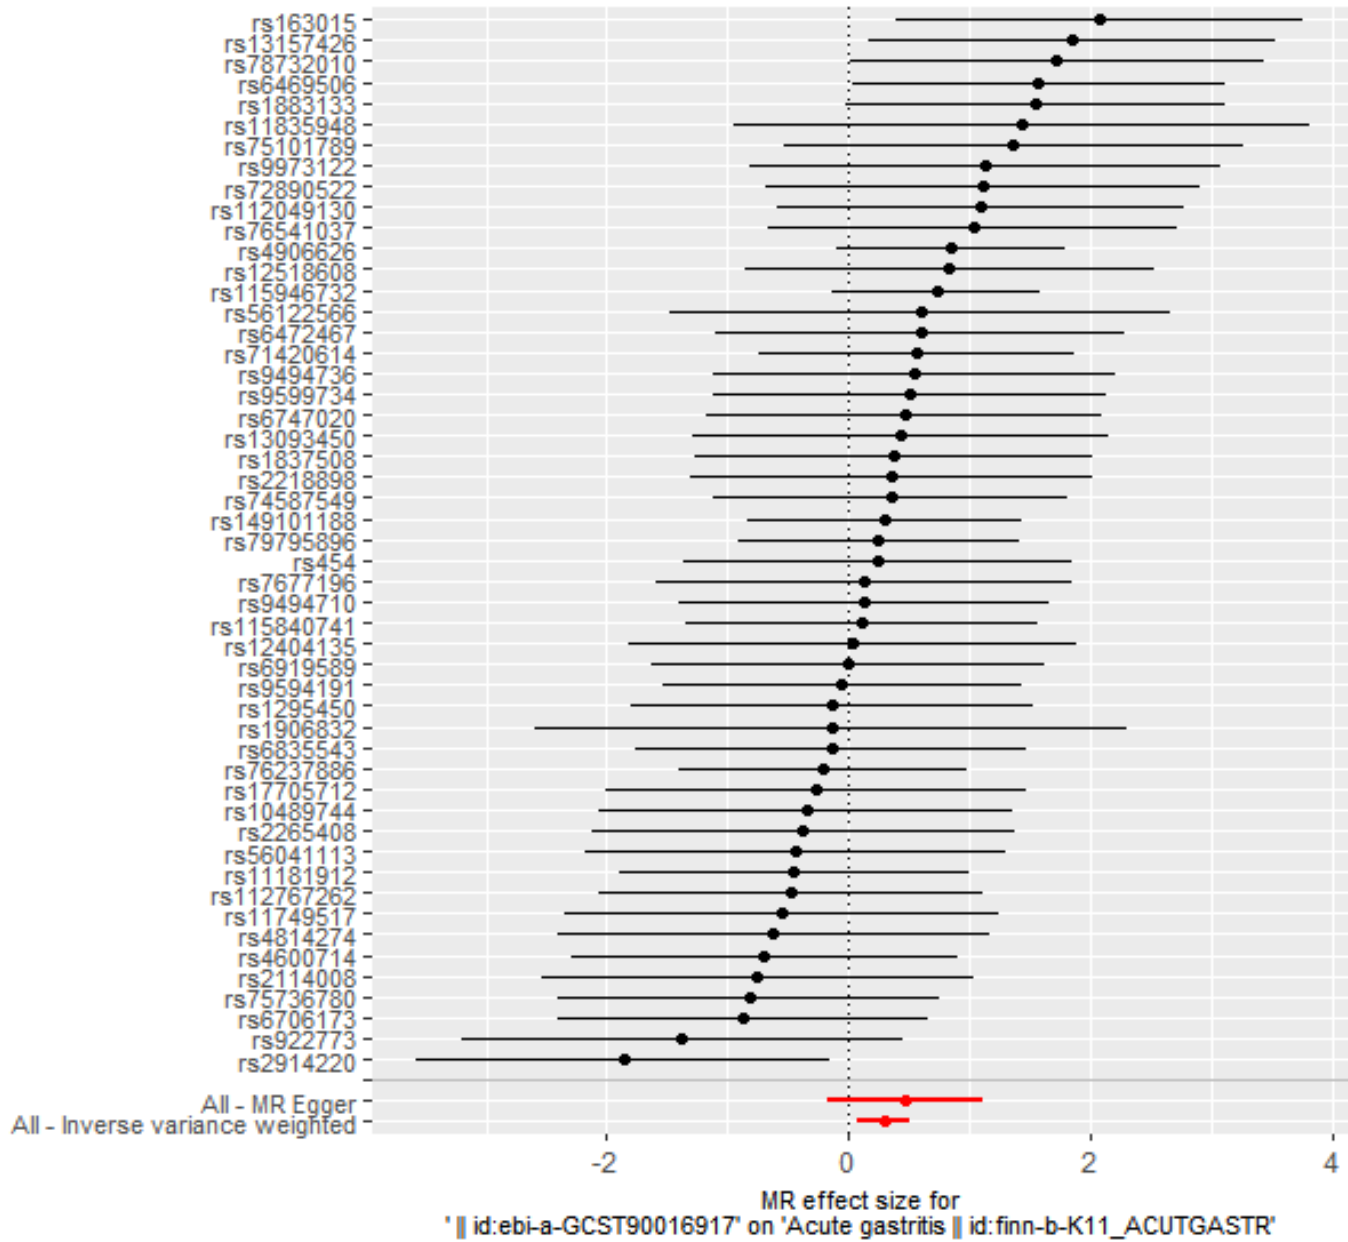

MR Test

- Inverse variance weighted
- MR Egger
- Simple mode
- Weighted median
- Weighted mode

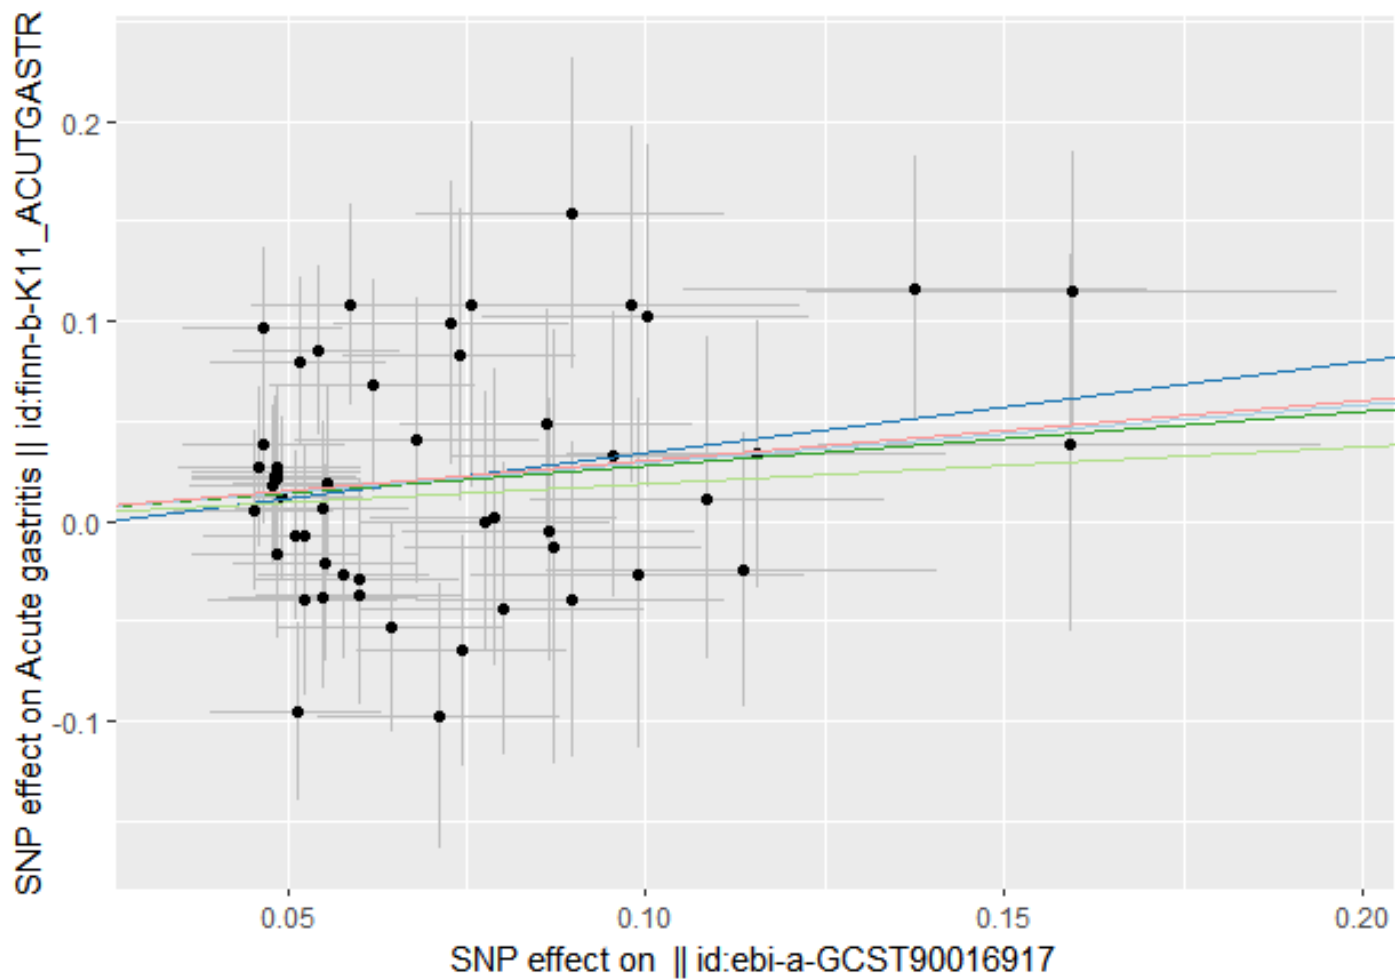

**Figure 72** Leave-one-out analysis, funnel plot, MR effect size and scatter plot for gut microbiota abundance (family Bacteroidaceae id.917) on acute gastritis

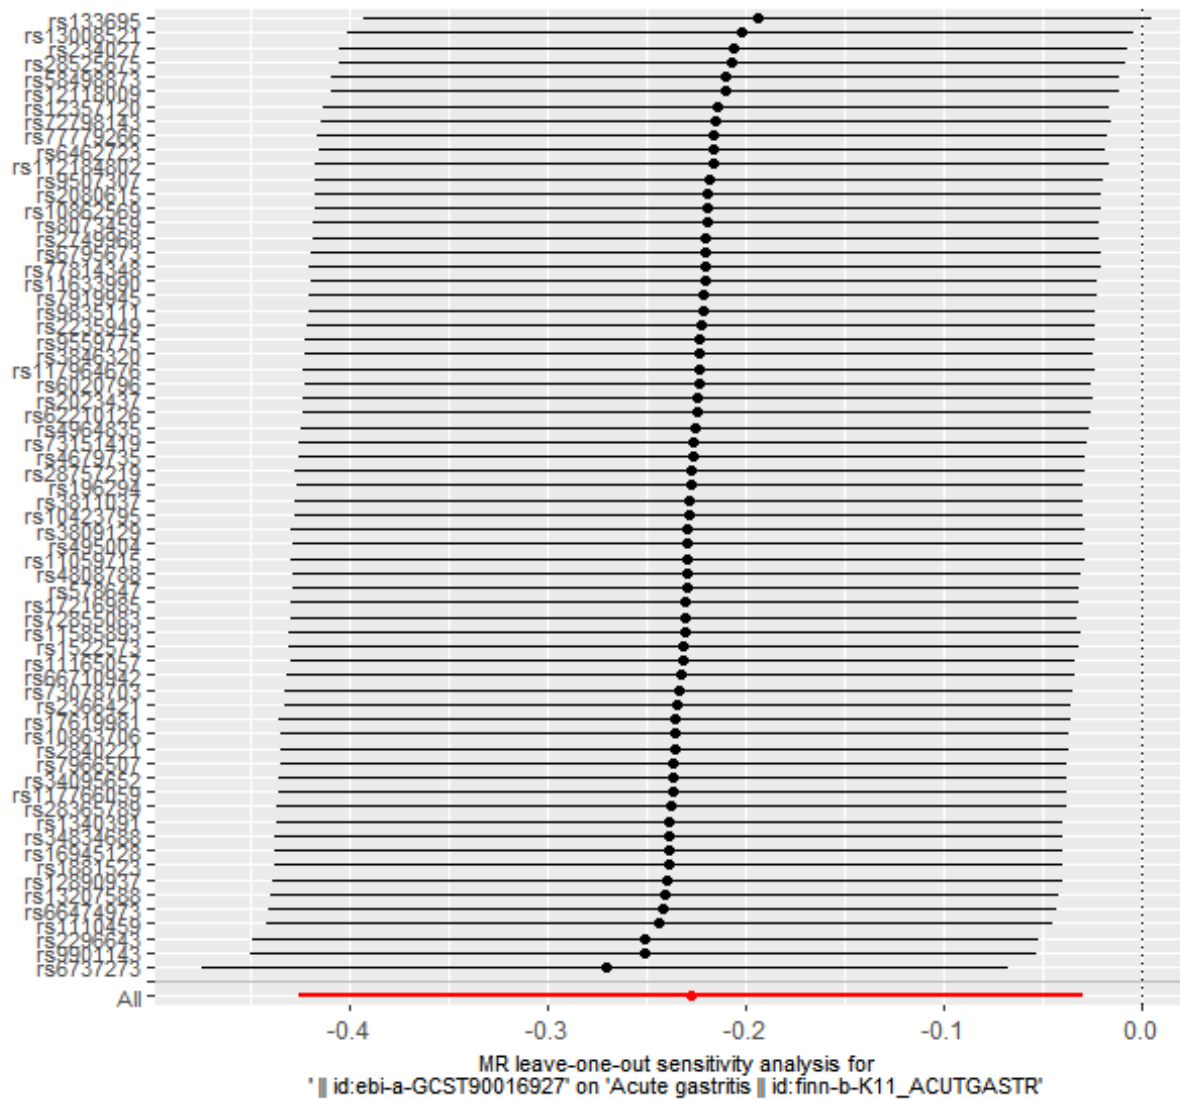

MR Method

- Inverse variance weighted
- MR Egger

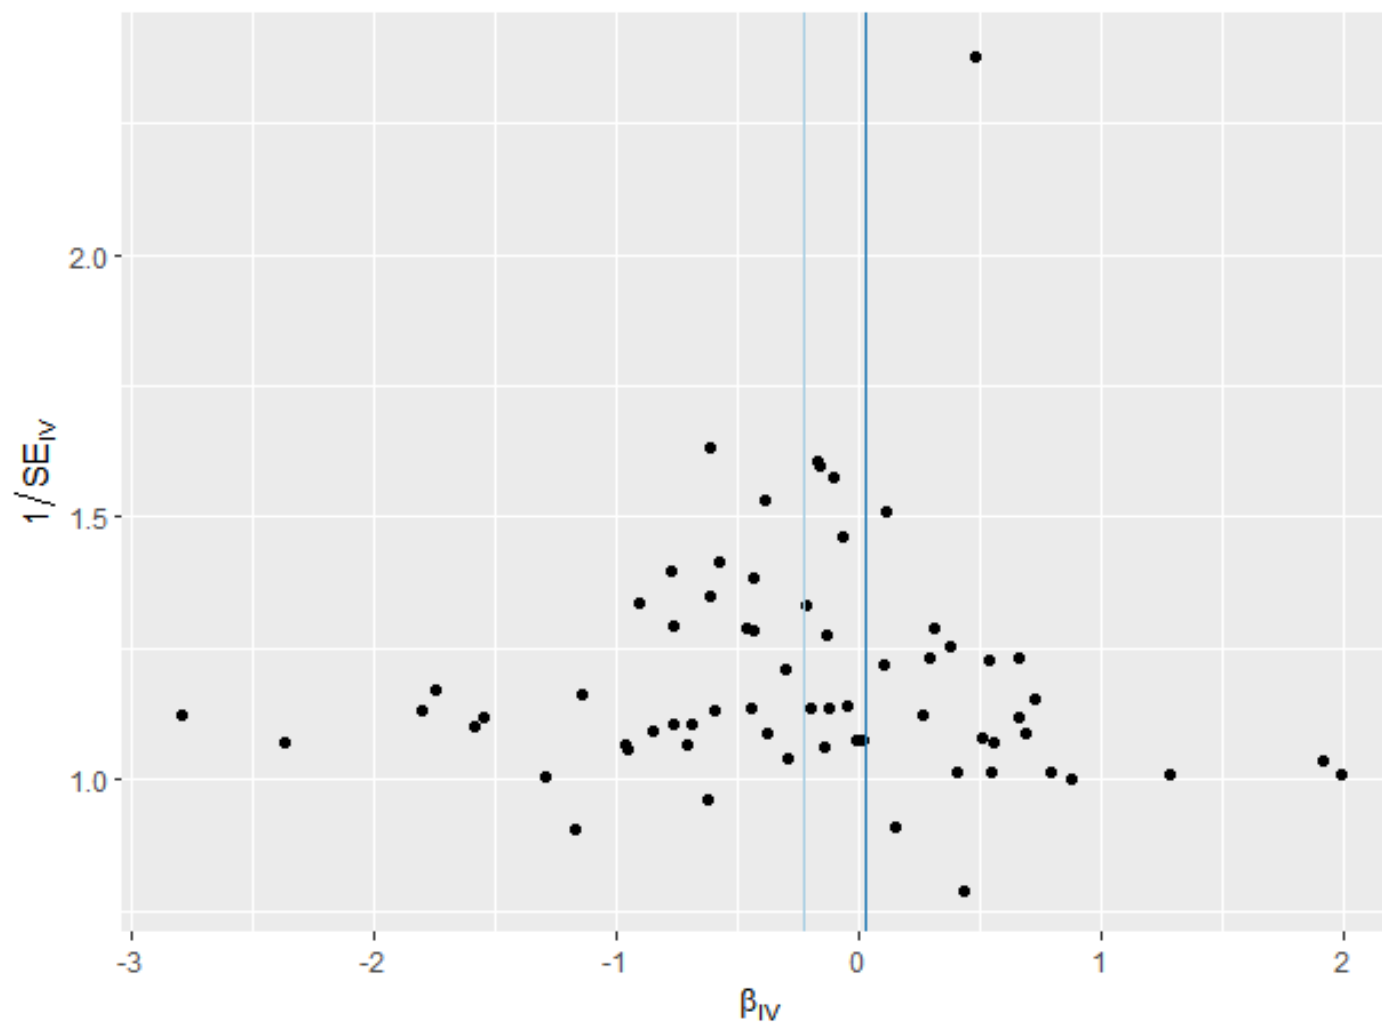

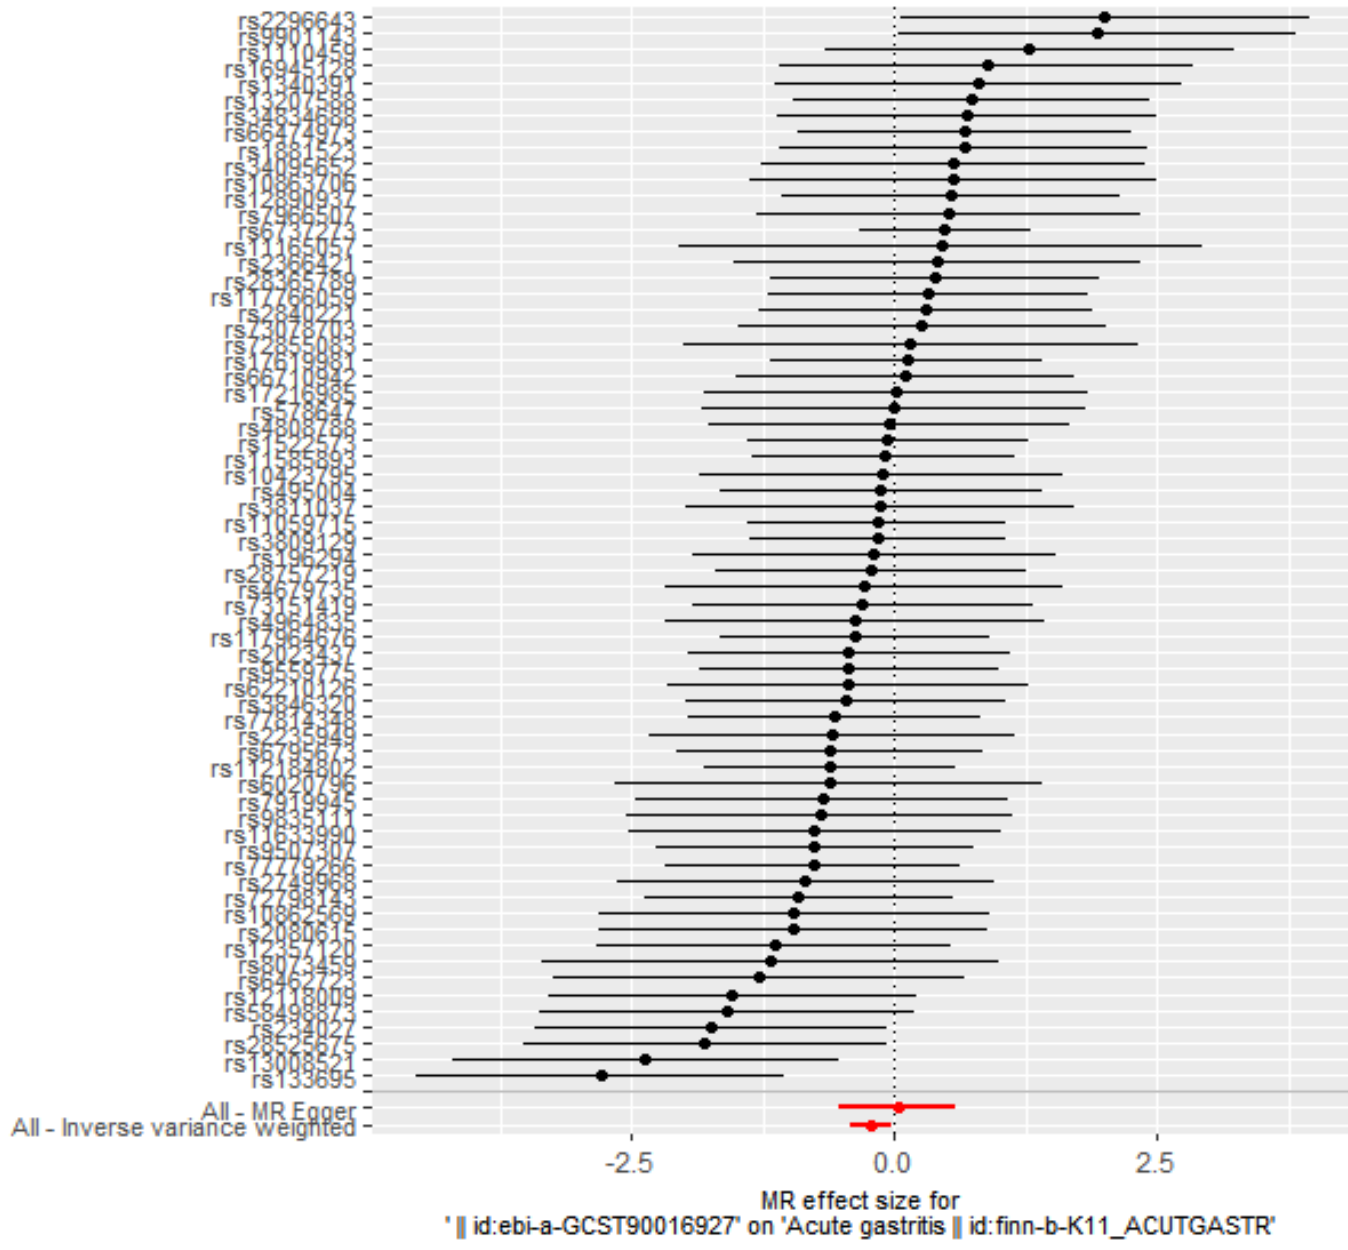

### MR Test

- Inverse variance weighted
- MR Egger
- Simple mode
- Weighted median
- Weighted mode

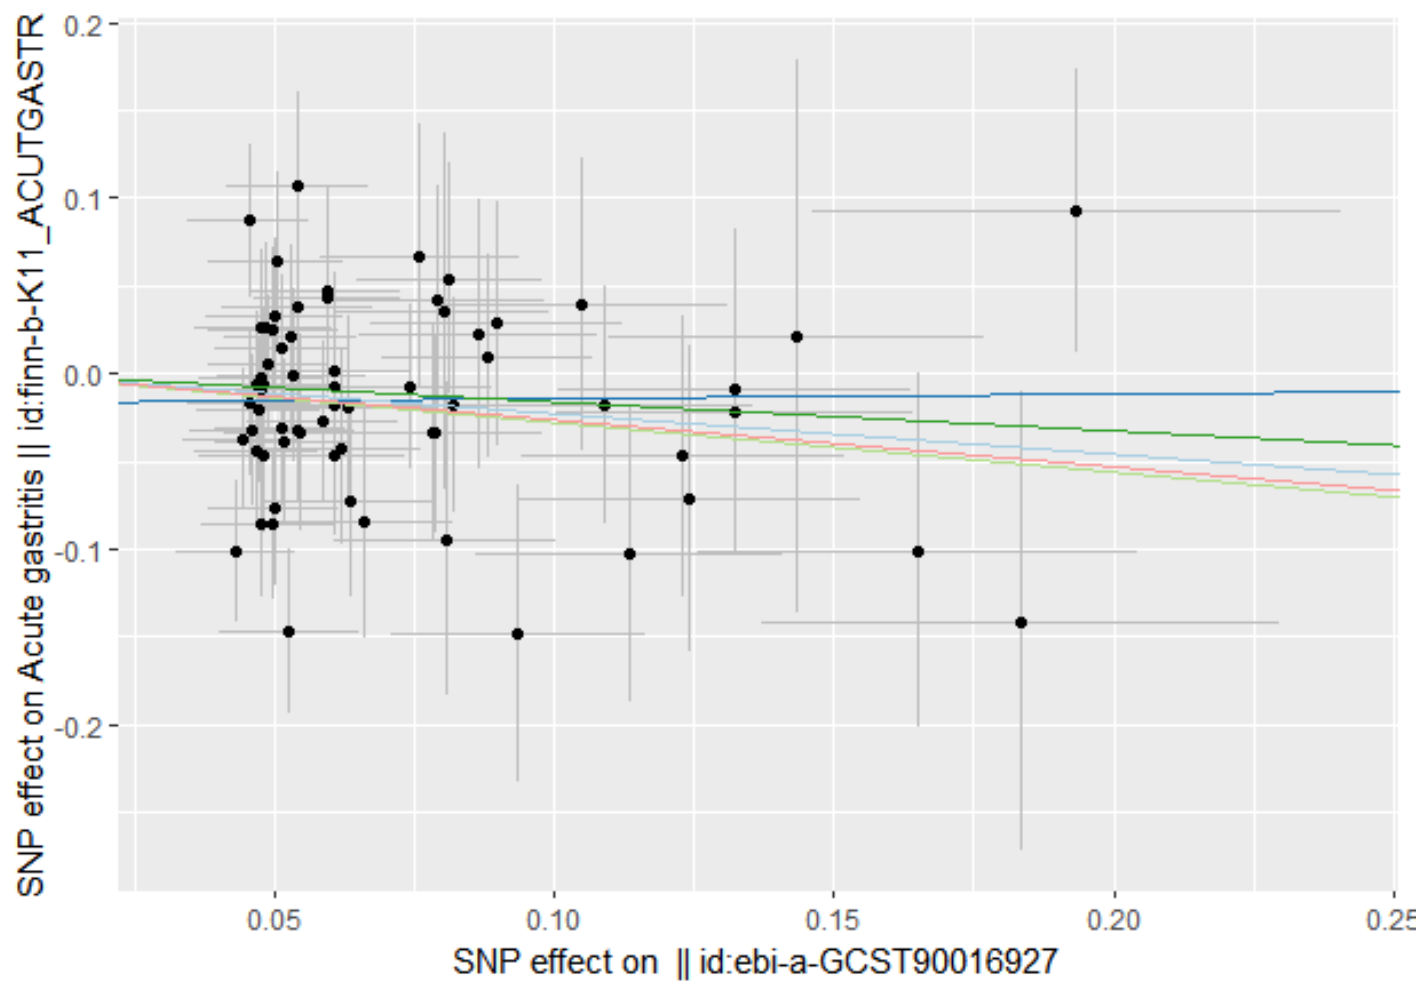



**Figure 73** Leave-one-out analysis, funnel plot, MR effect size and scatter plot for gut microbiota abundance (genus *Alloprevotella* id.961) on acute gastritis

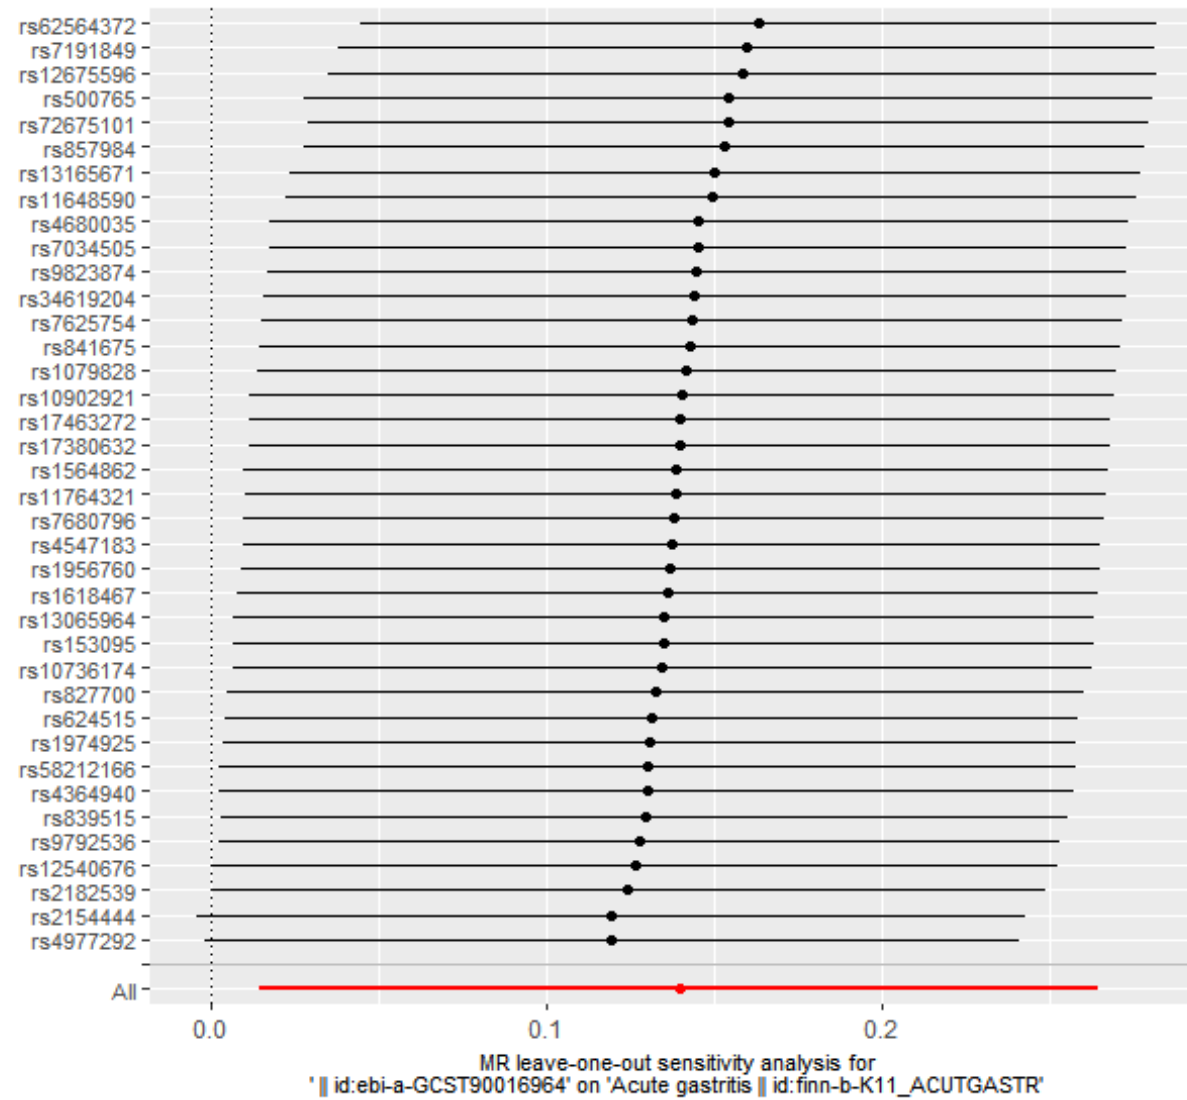

MR Method

- Inverse variance weighted
- MR Egger

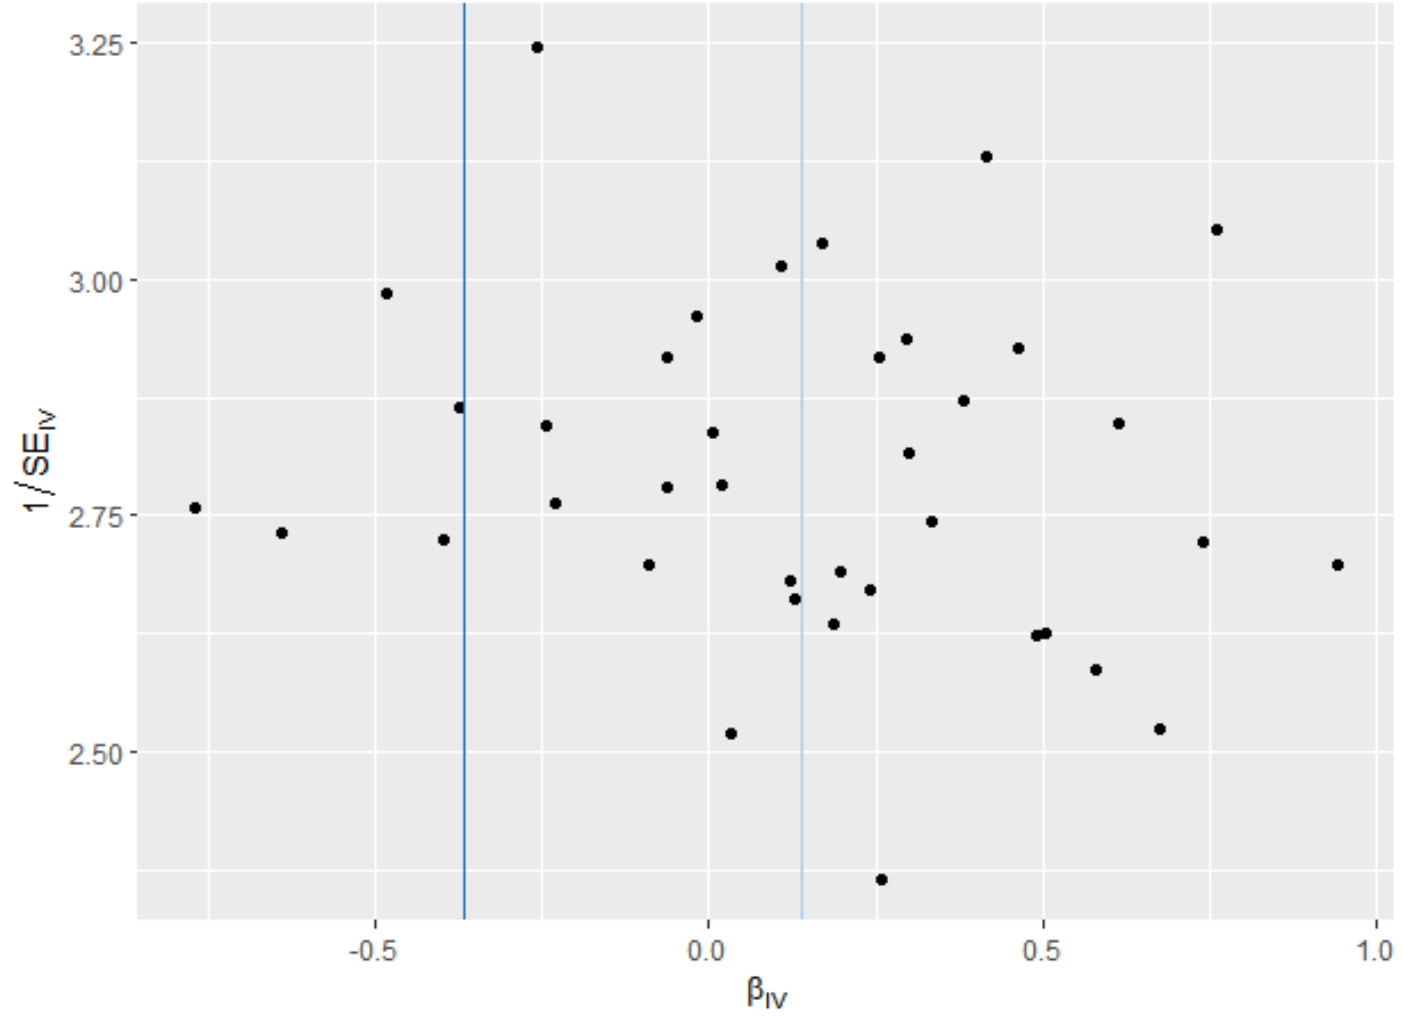

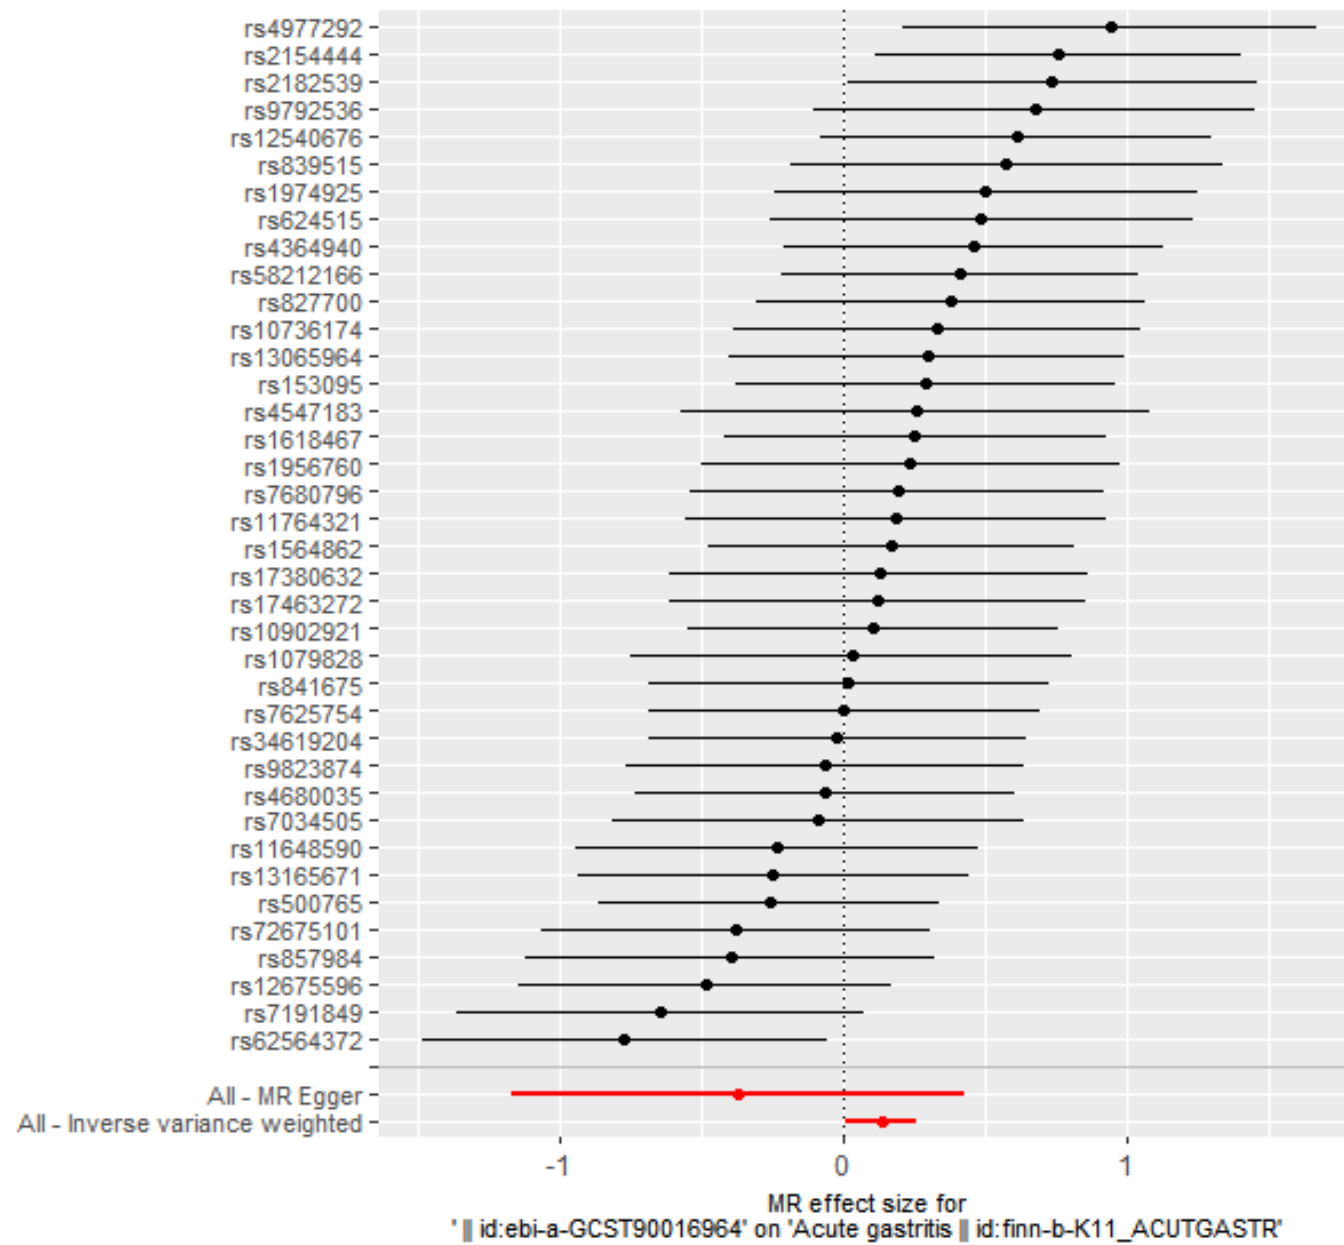

MR Test

- Inverse variance weighted
- MR Egger
- Simple mode
- Weighted median
- Weighted mode

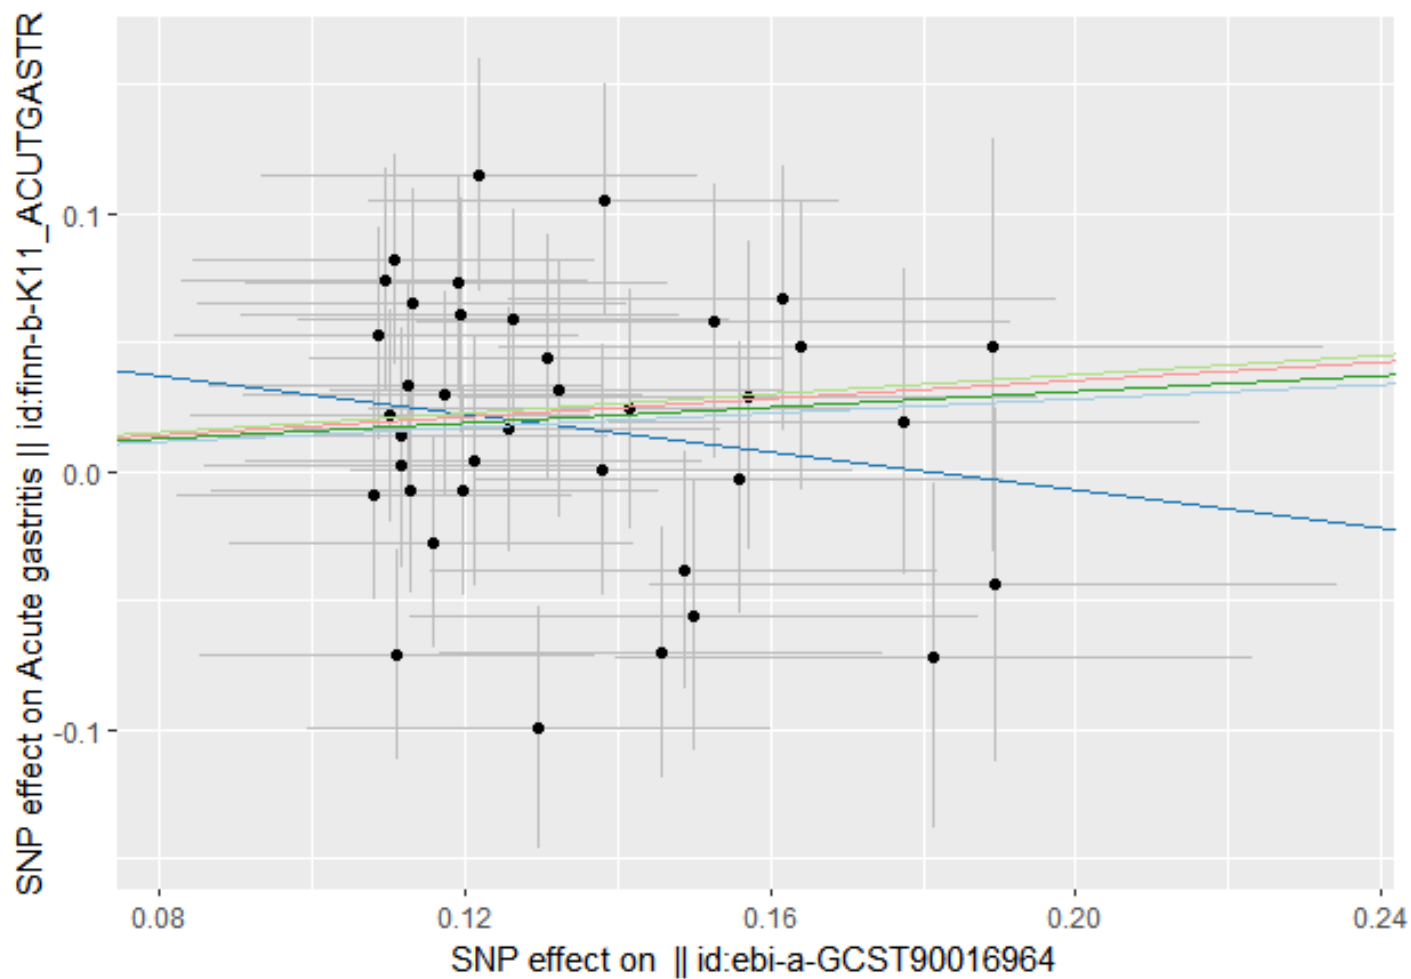

**Figure 74** Leave-one-out analysis, funnel plot, MR effect size and scatter plot for gut microbiota abundance (genus Bacteroides id.918) on acute gastritis

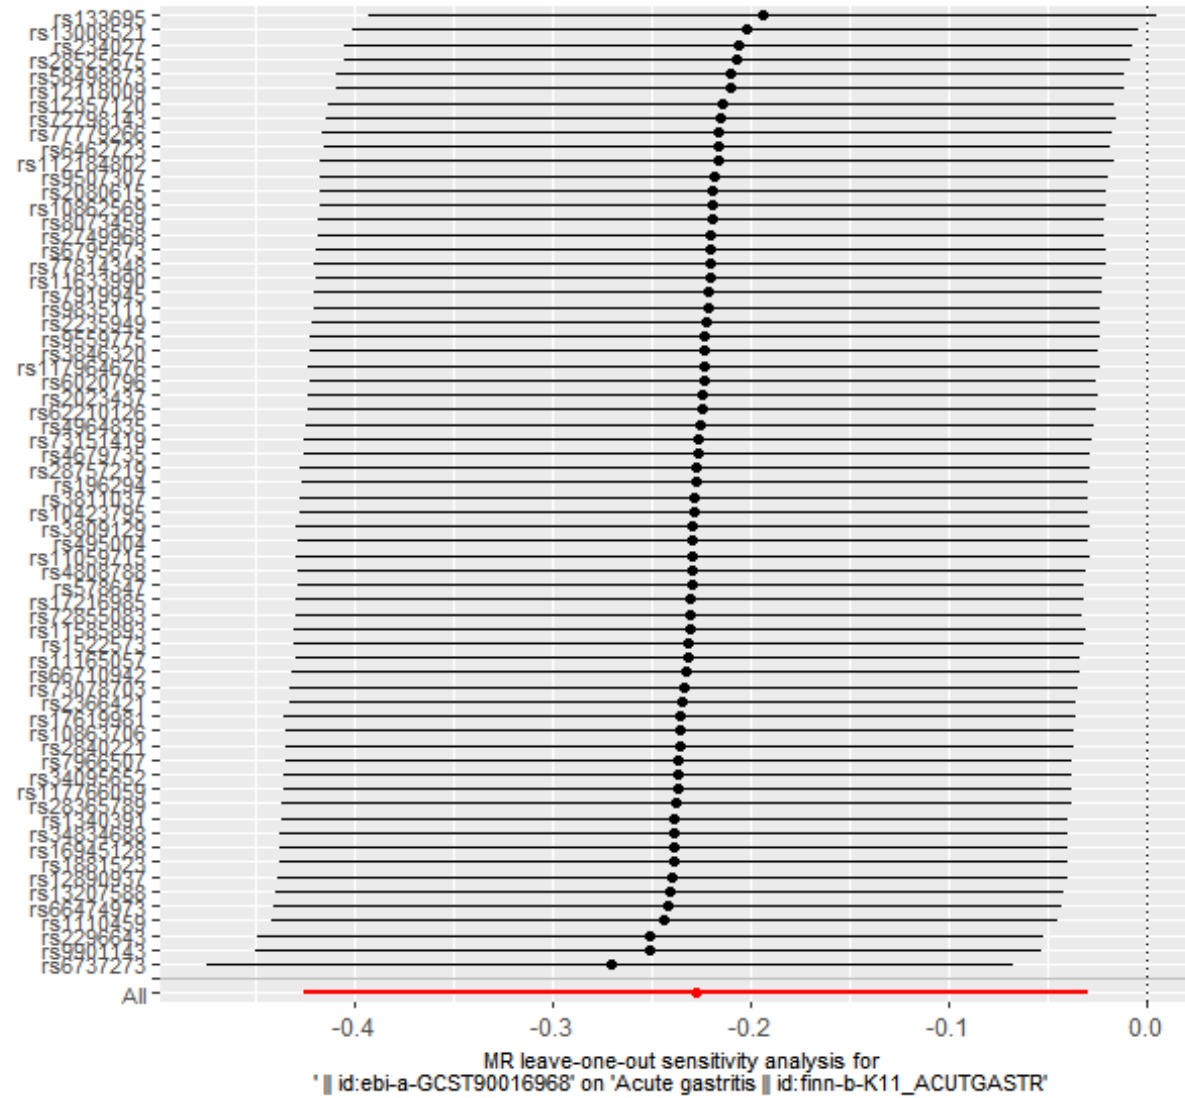

MR Method

- Inverse variance weighted
- MR Egger



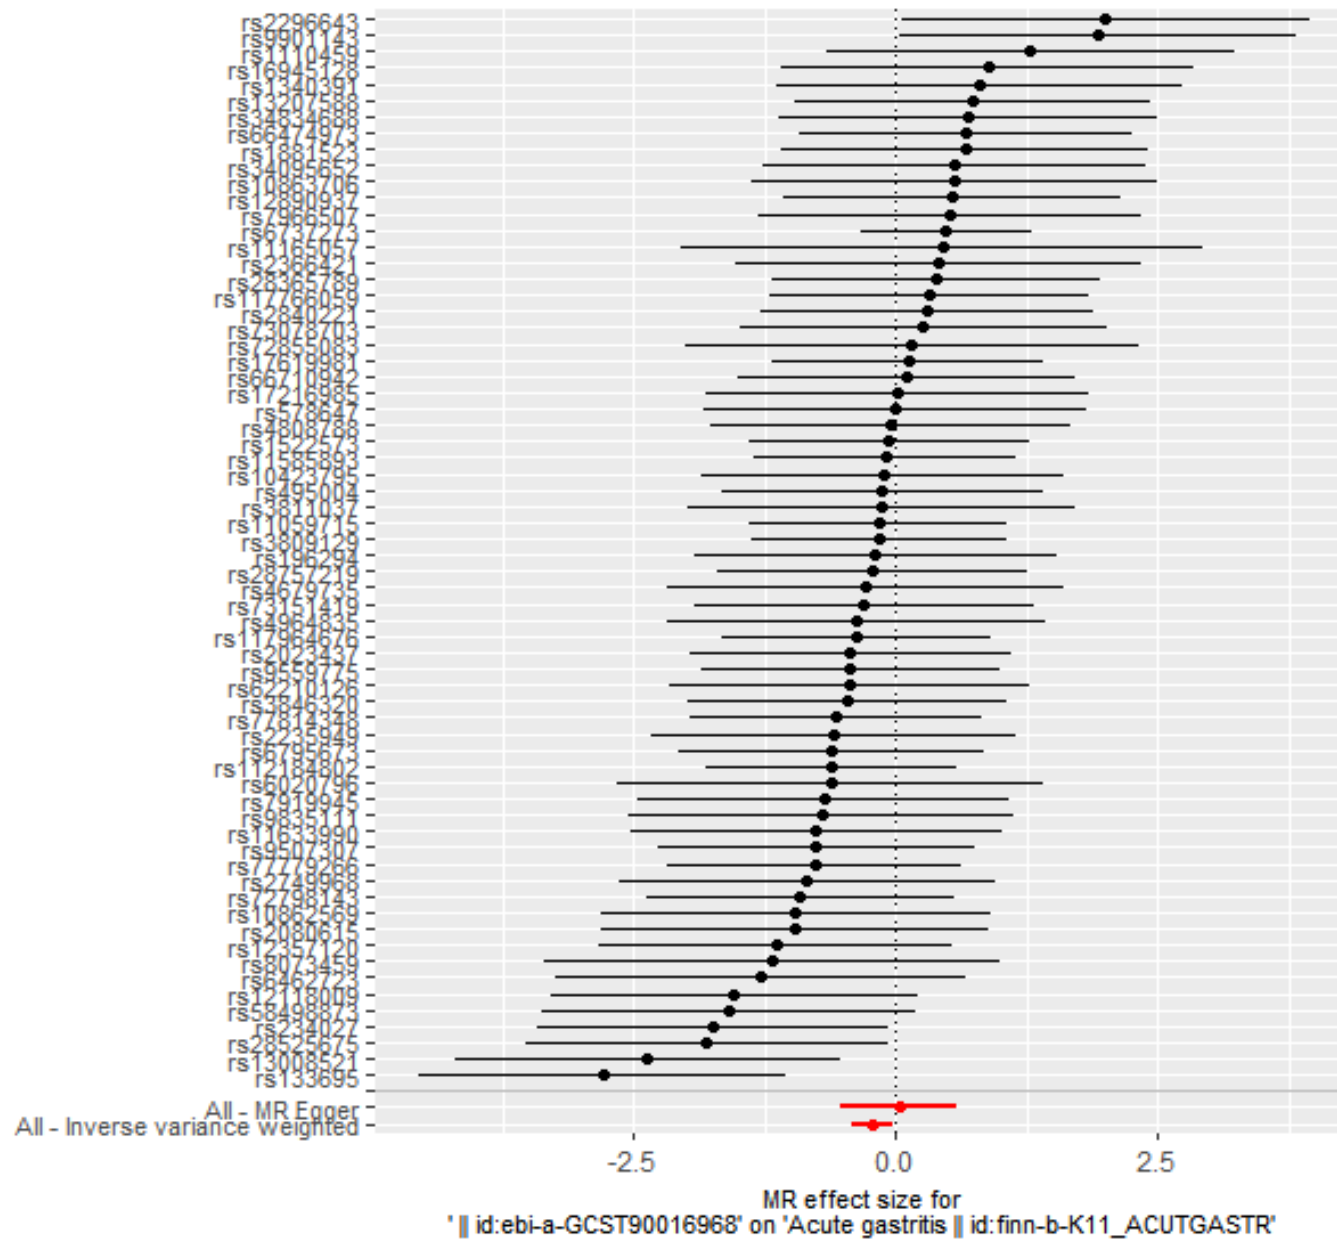

MR Test

- Inverse variance weighted
- MR Egger
- Simple mode
- Weighted median
- Weighted mode

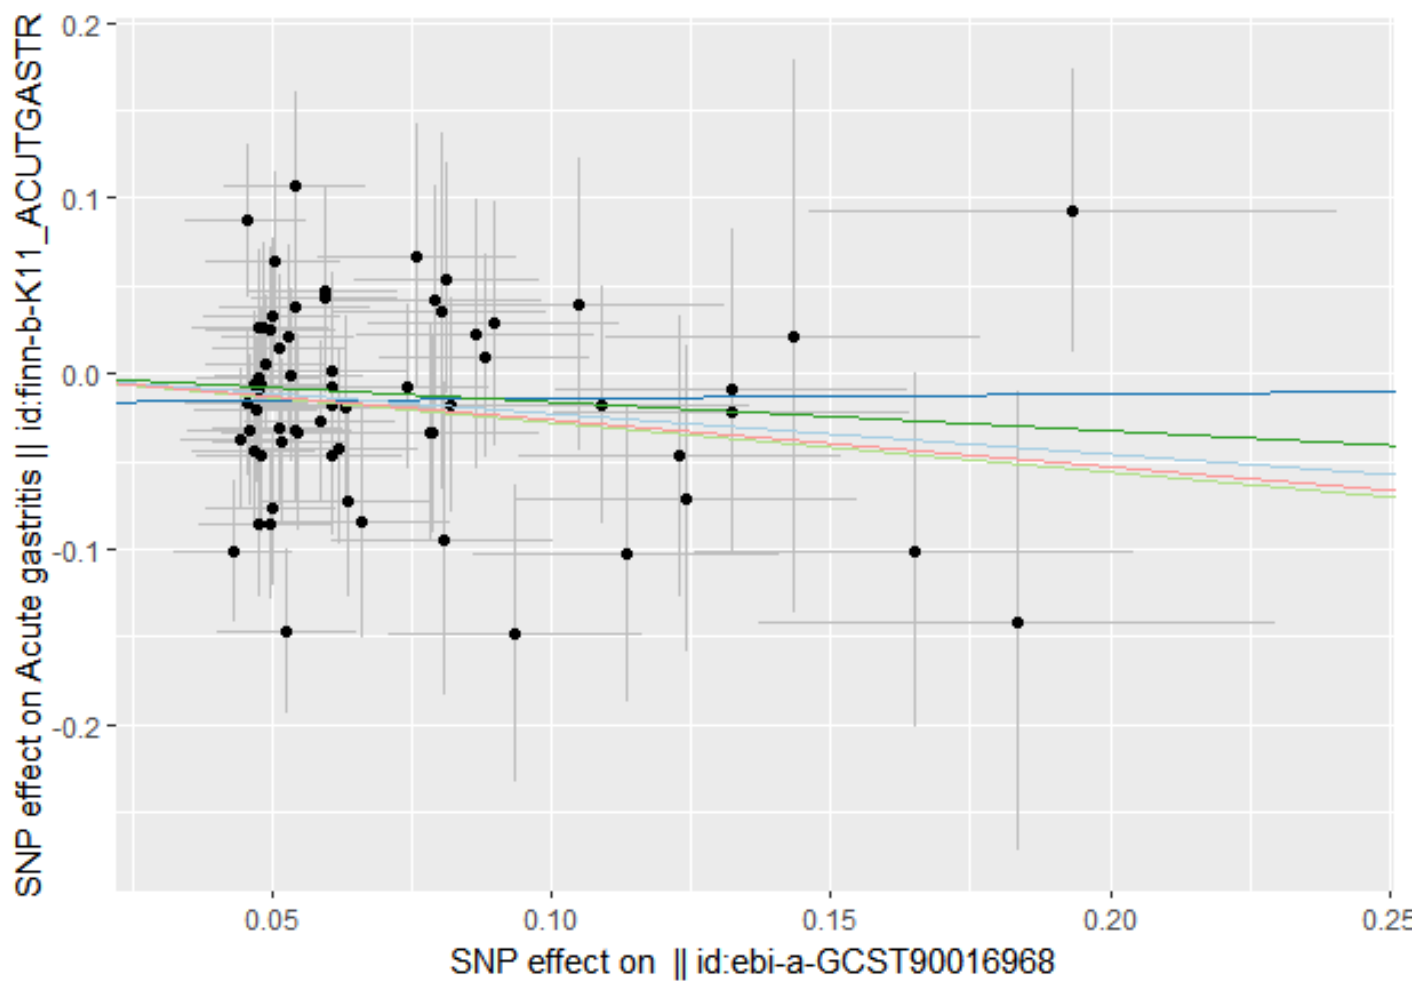



**Figure 75** Leave-one-out analysis, funnel plot, MR effect size and scatter plot for gut microbiota abundance (genus *Bilophila* id.3170) on acute gastritis

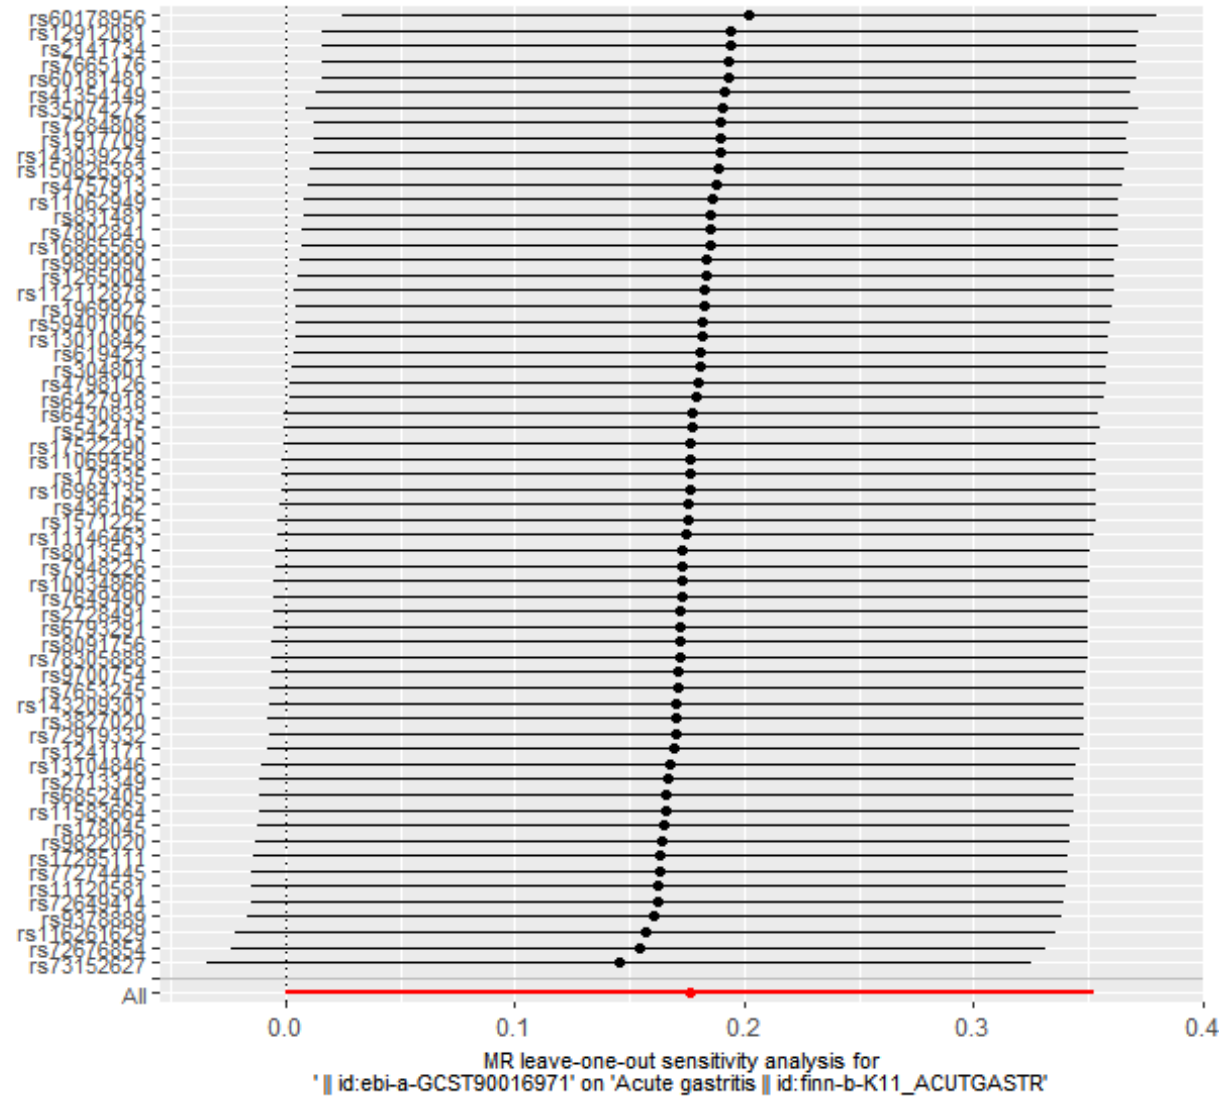

MR Method

- Inverse variance weighted
- MR Egger

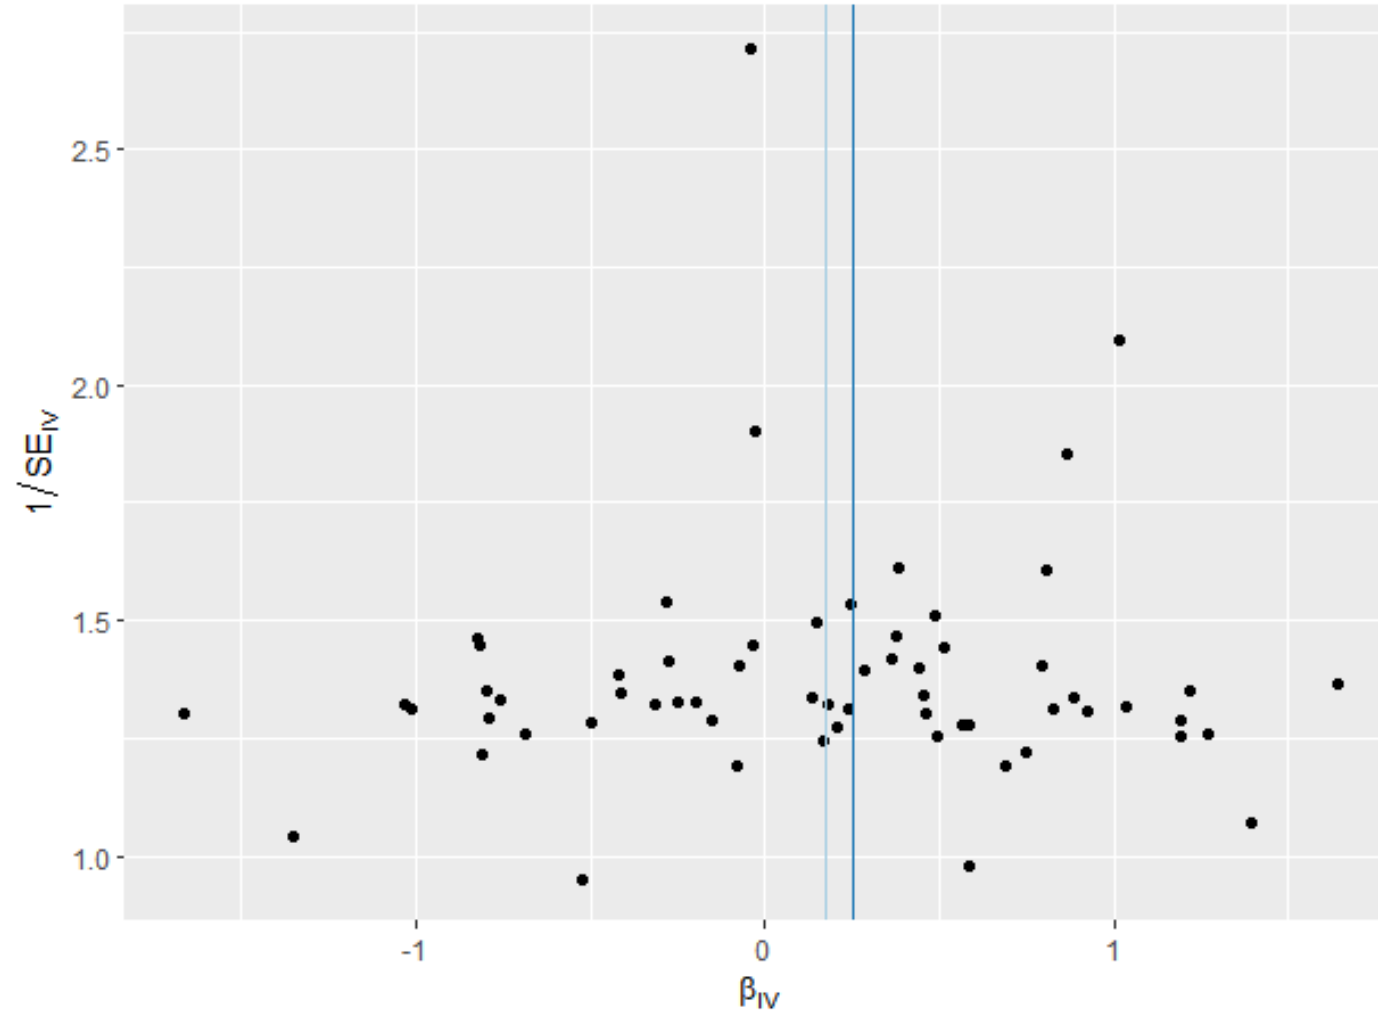

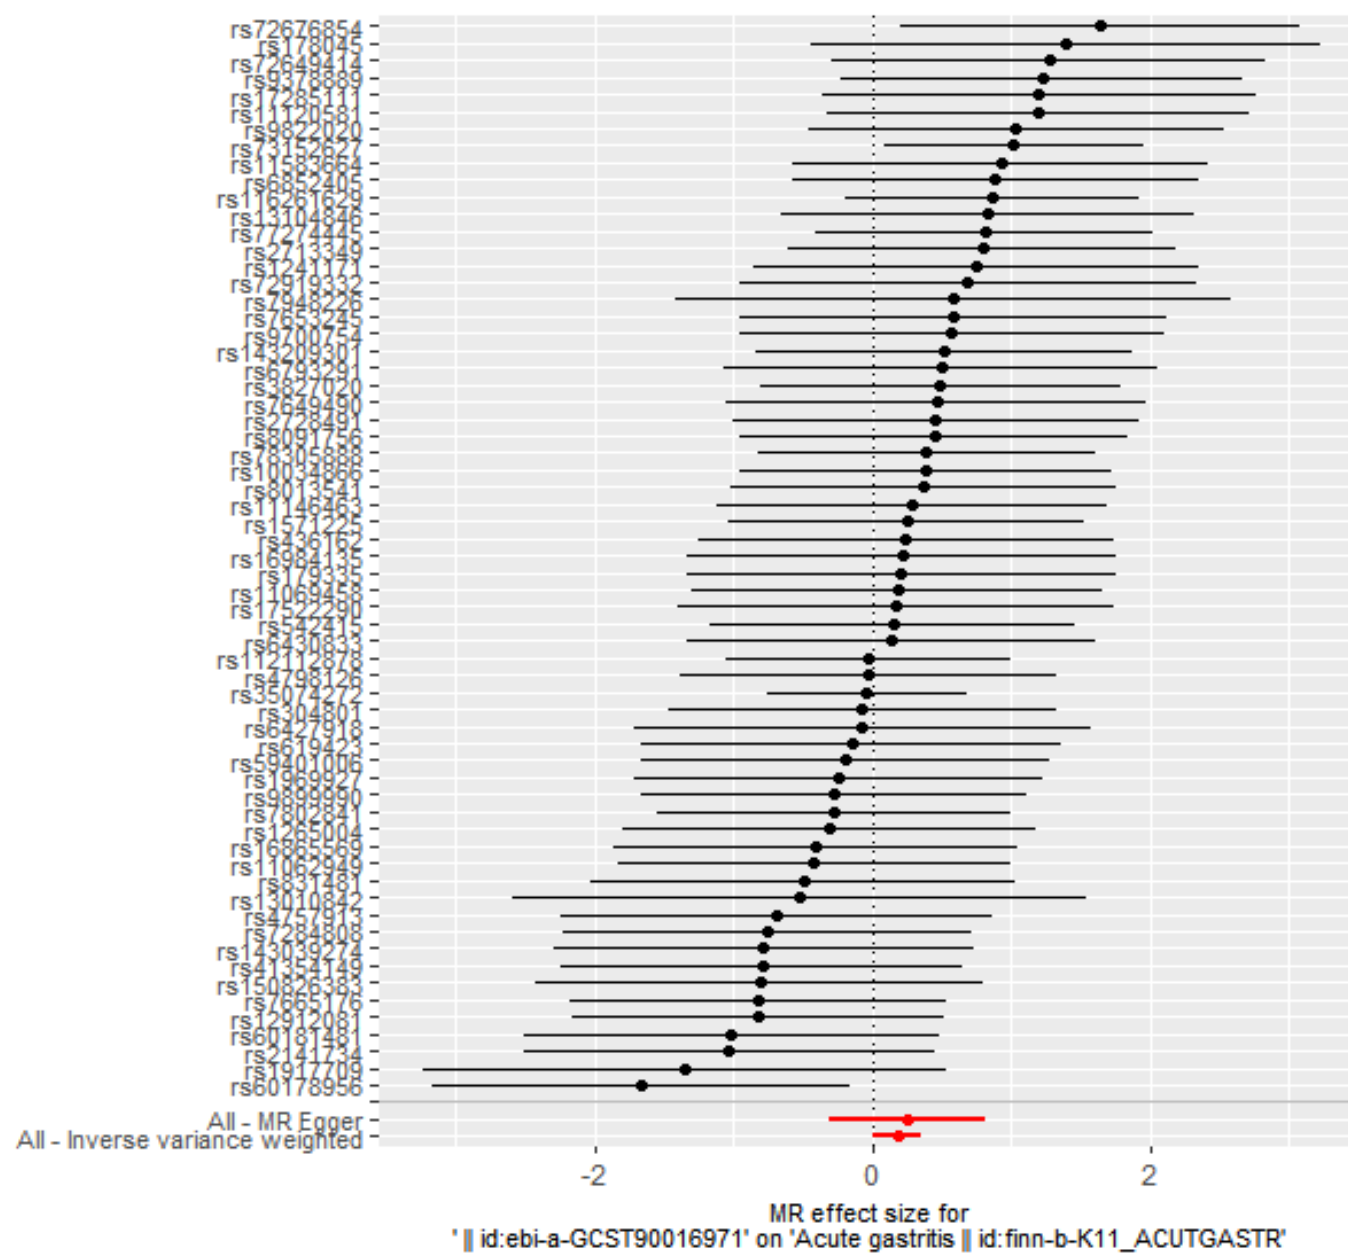

MR Test

- Inverse variance weighted
- MR Egger
- Simple mode
- Weighted median
- Weighted mode

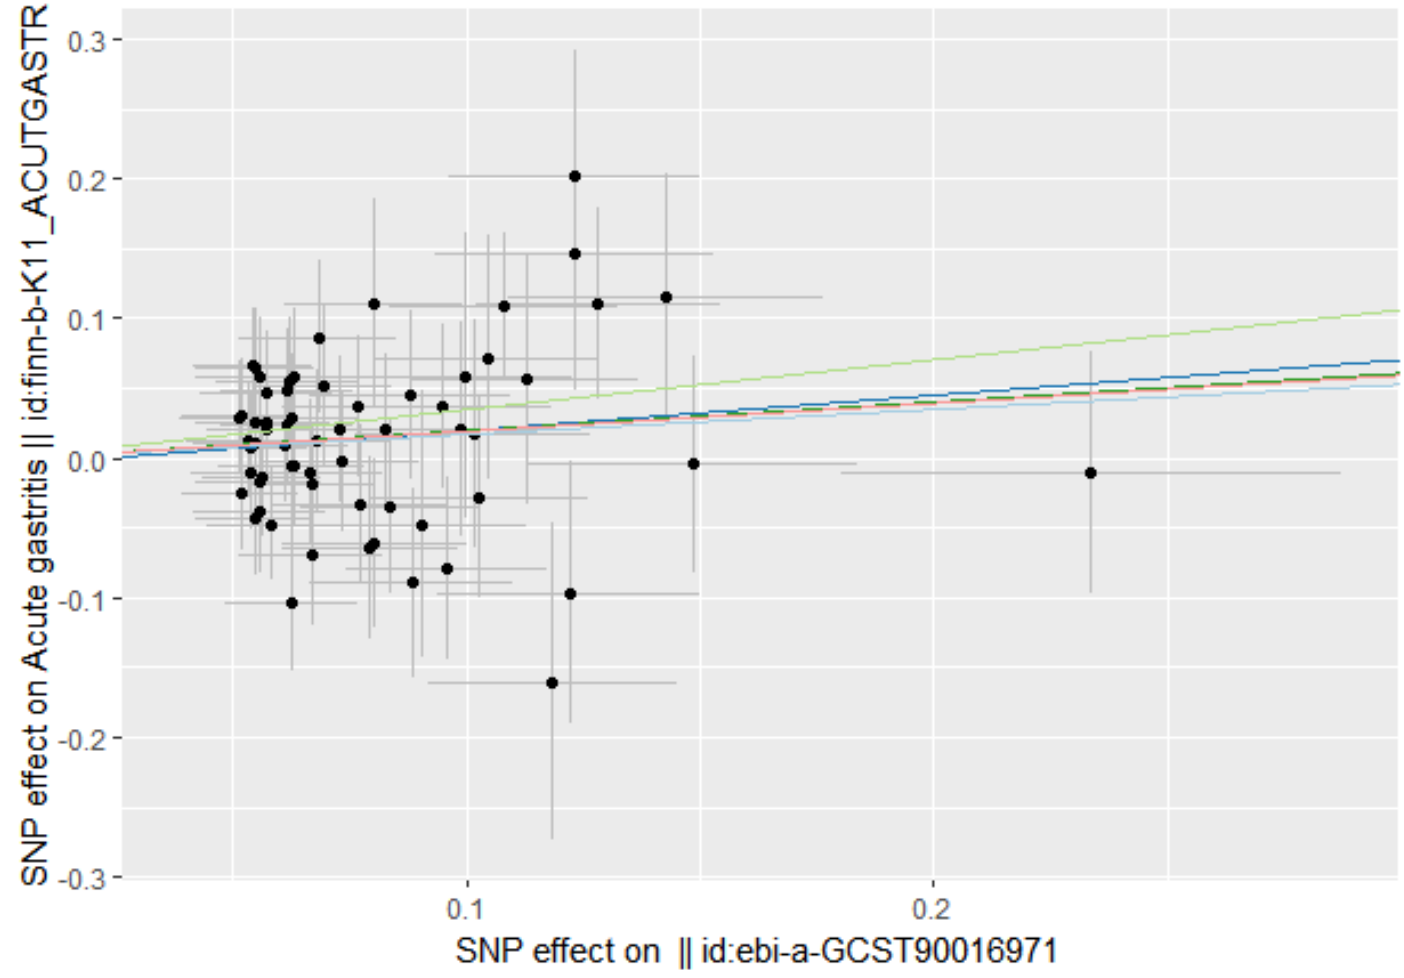

**Figure 76** Leave-one-out analysis, funnel plot, MR effect size and scatter plot for gut microbiota abundance (genus *Dialister* id.2183) on acute gastritis

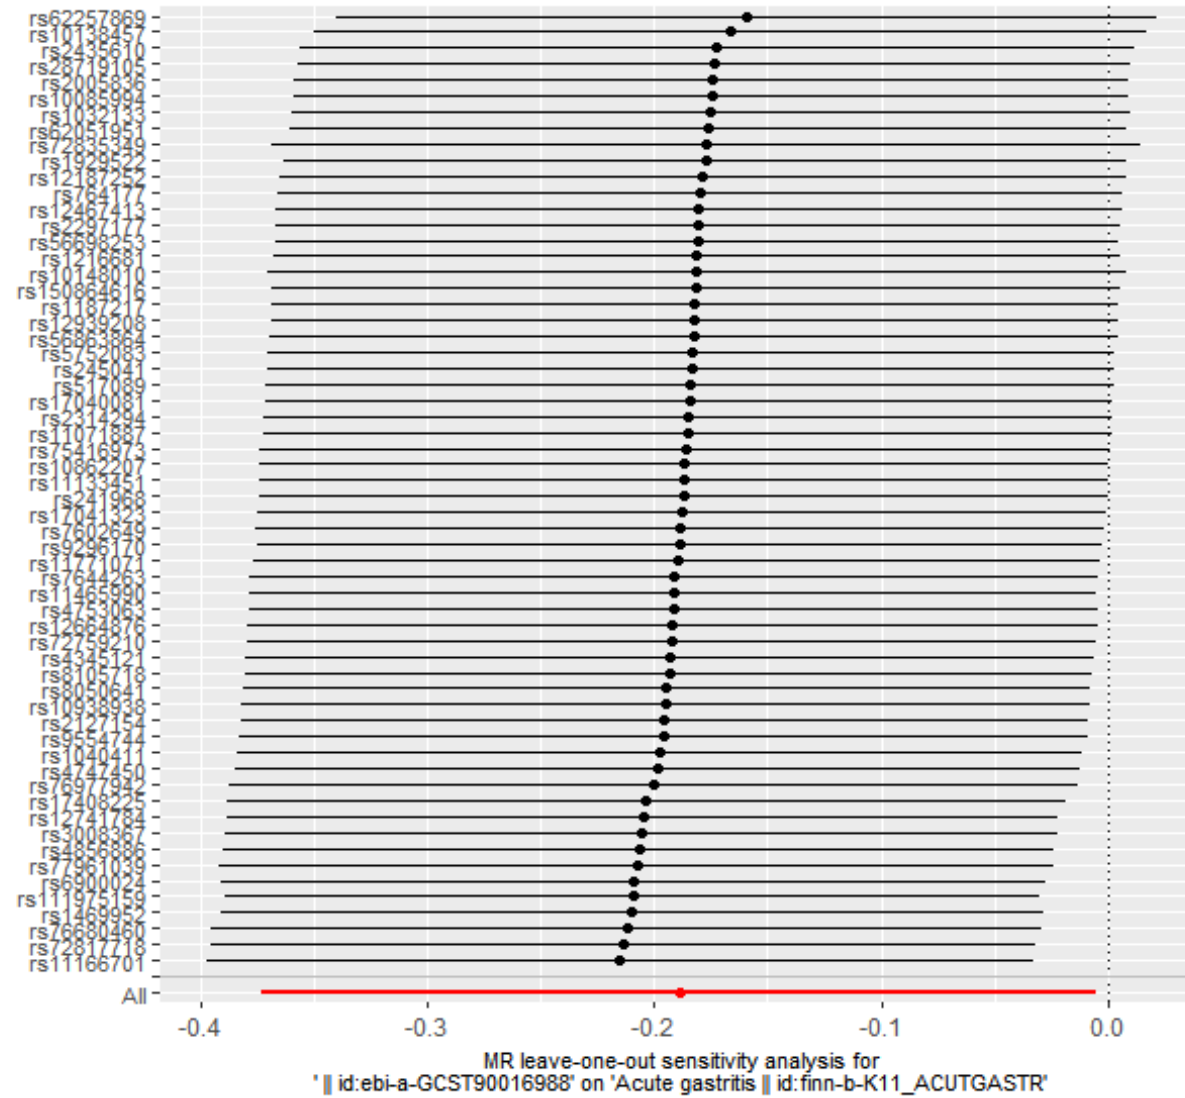

MR Method

- Inverse variance weighted
- MR Egger

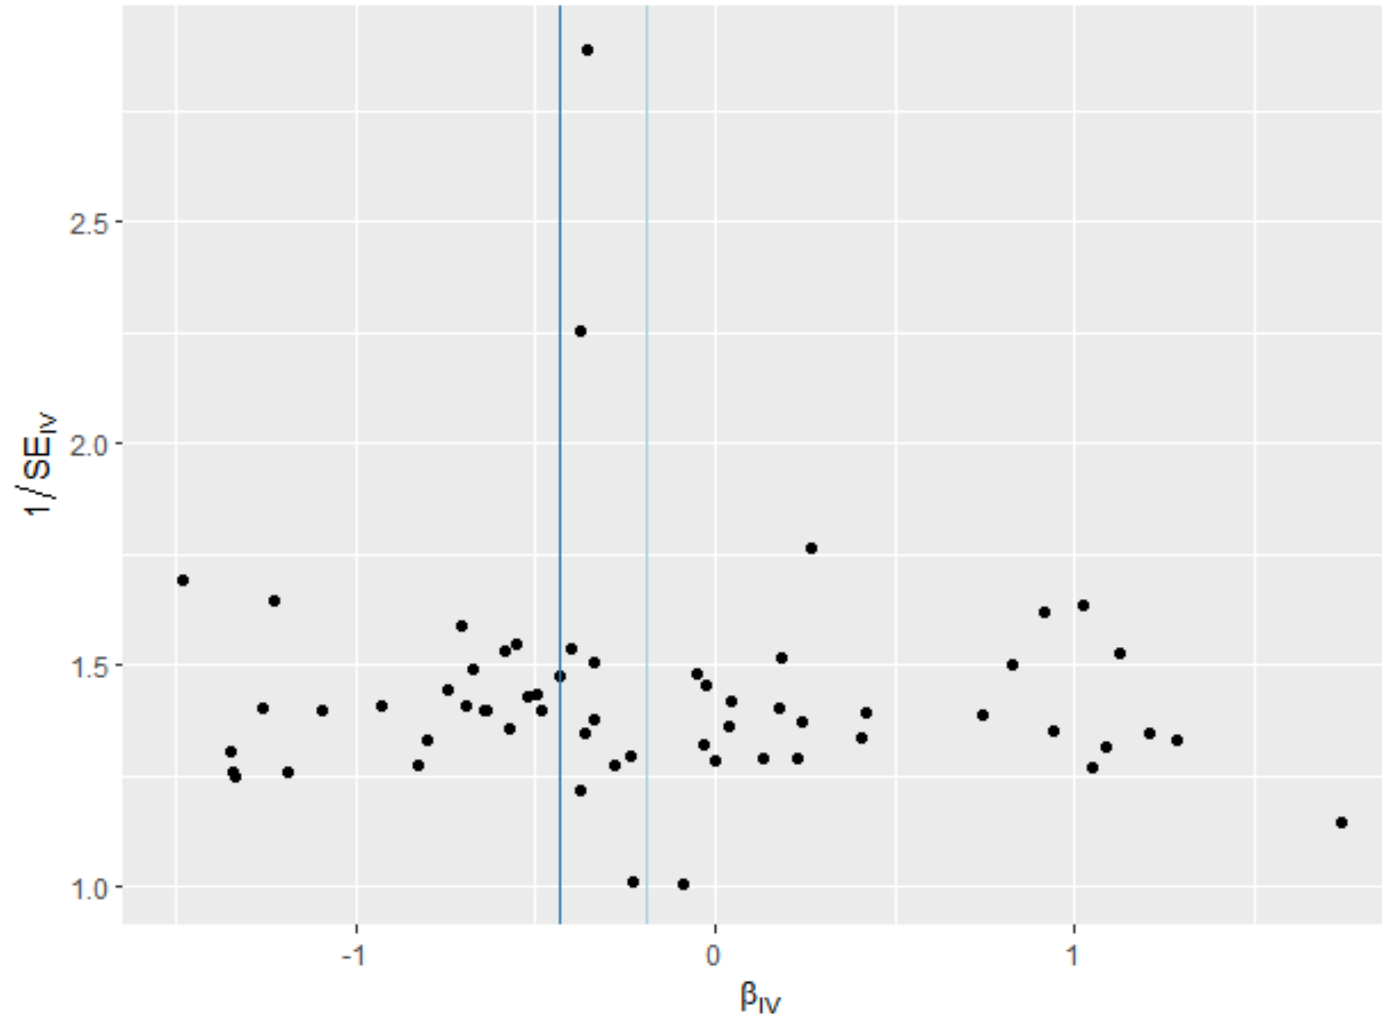

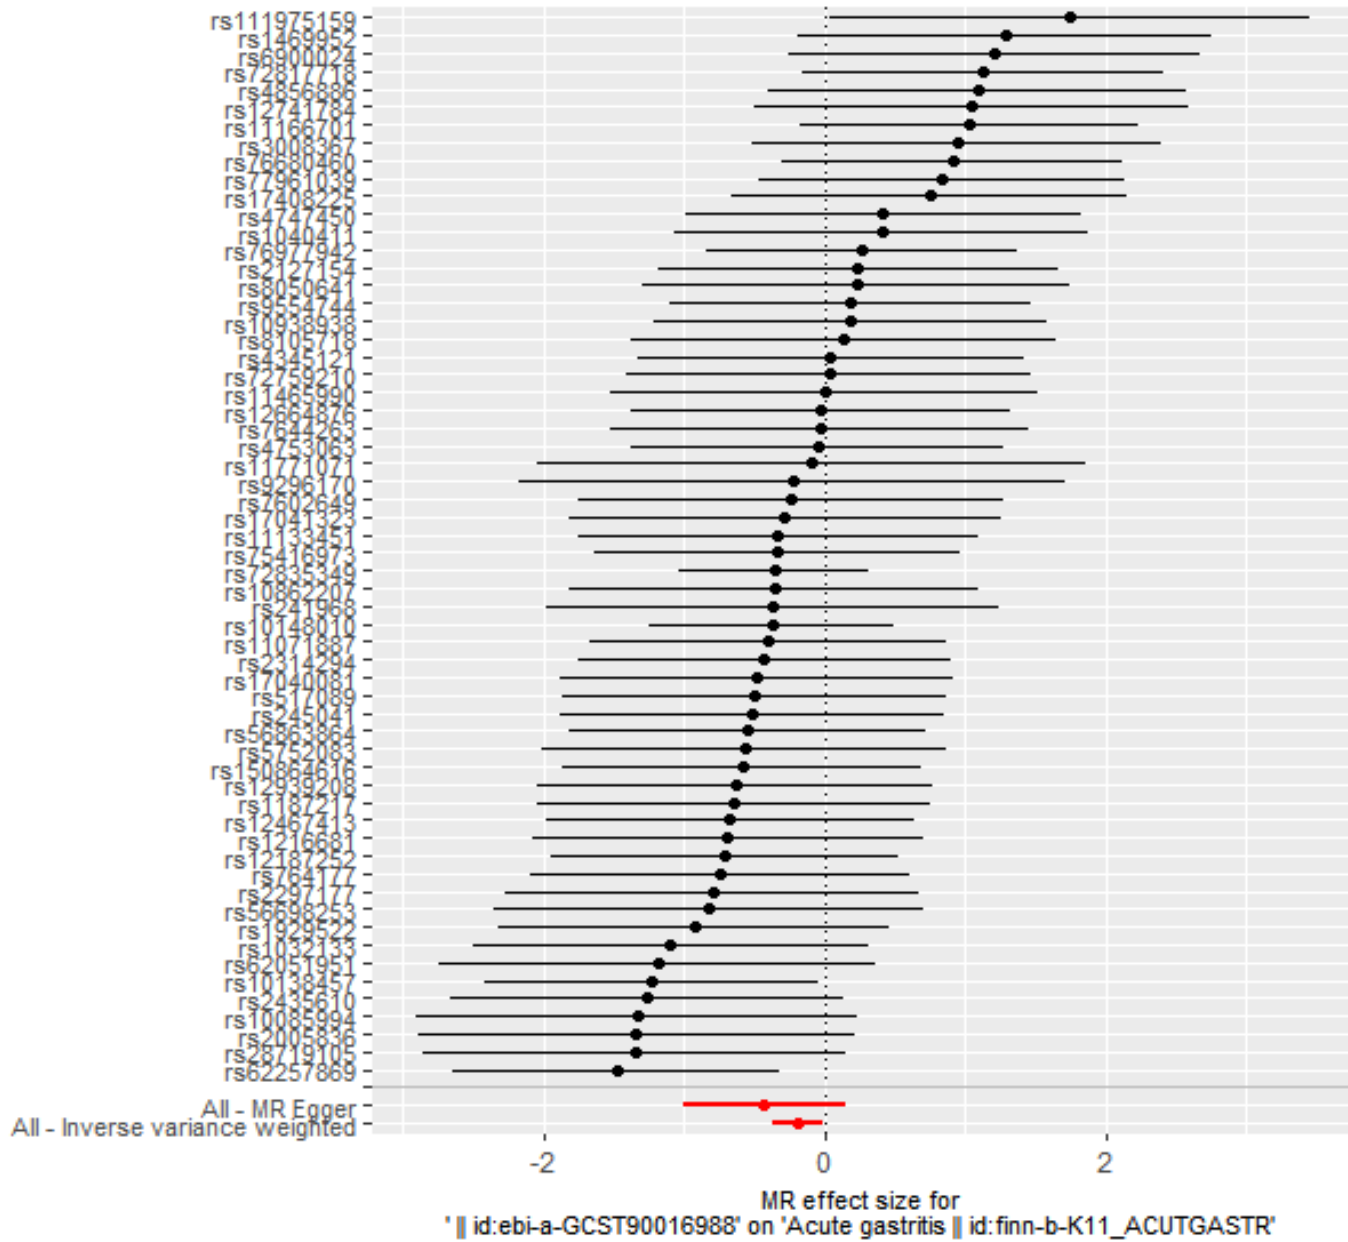

MR Test

- Inverse variance weighted
- MR Egger
- Simple mode
- Weighted median
- Weighted mode

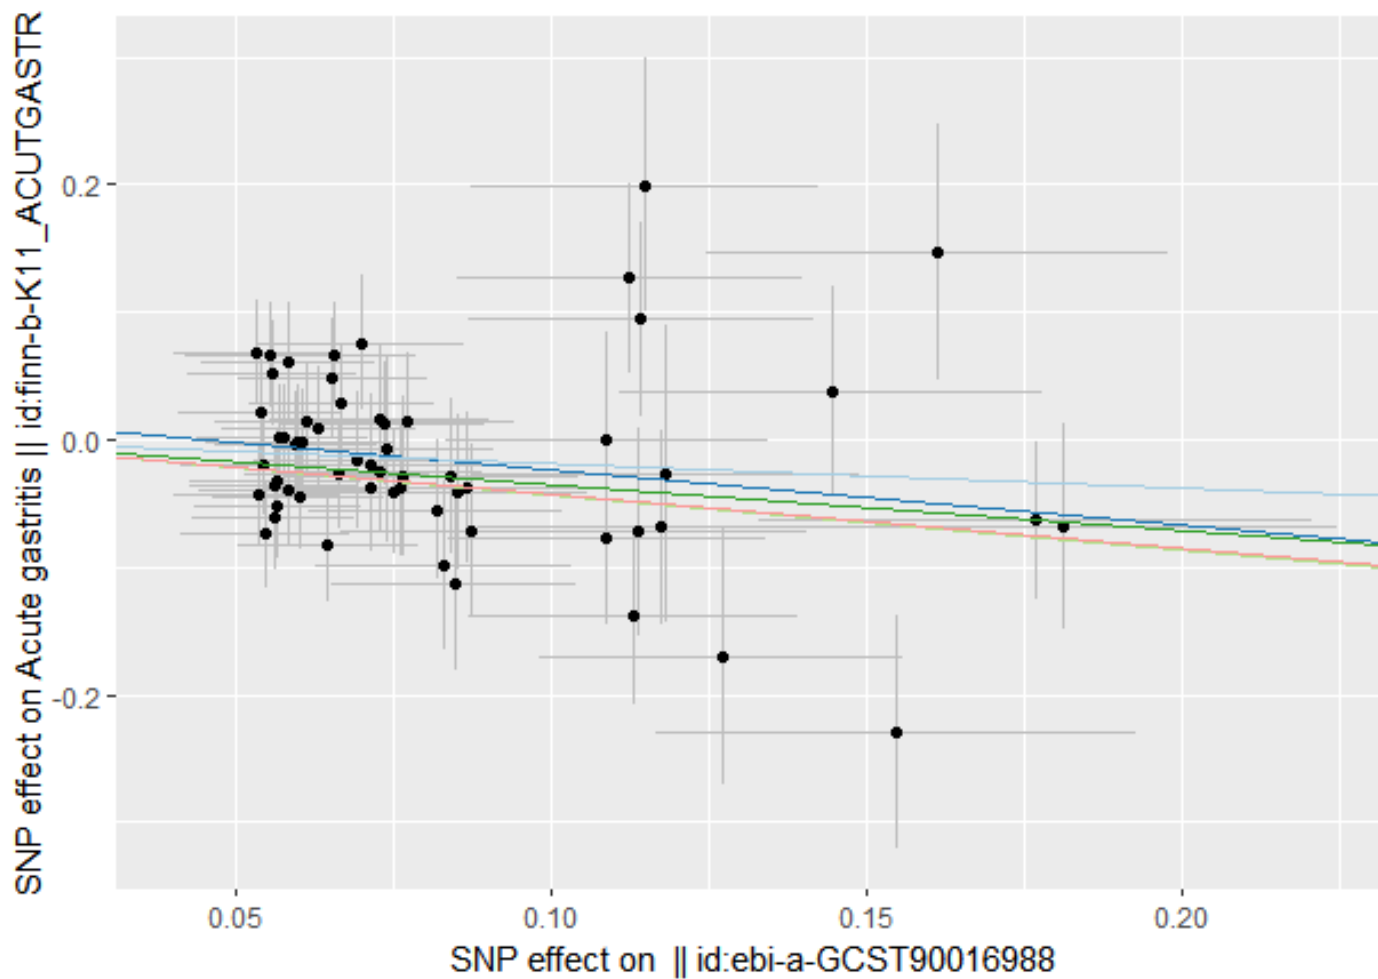



**Figure 77** Leave-one-out analysis, funnel plot, MR effect size and scatter plot for gut microbiota abundance (genus *Eubacterium nodatum* group id.11297) on acute gastritis

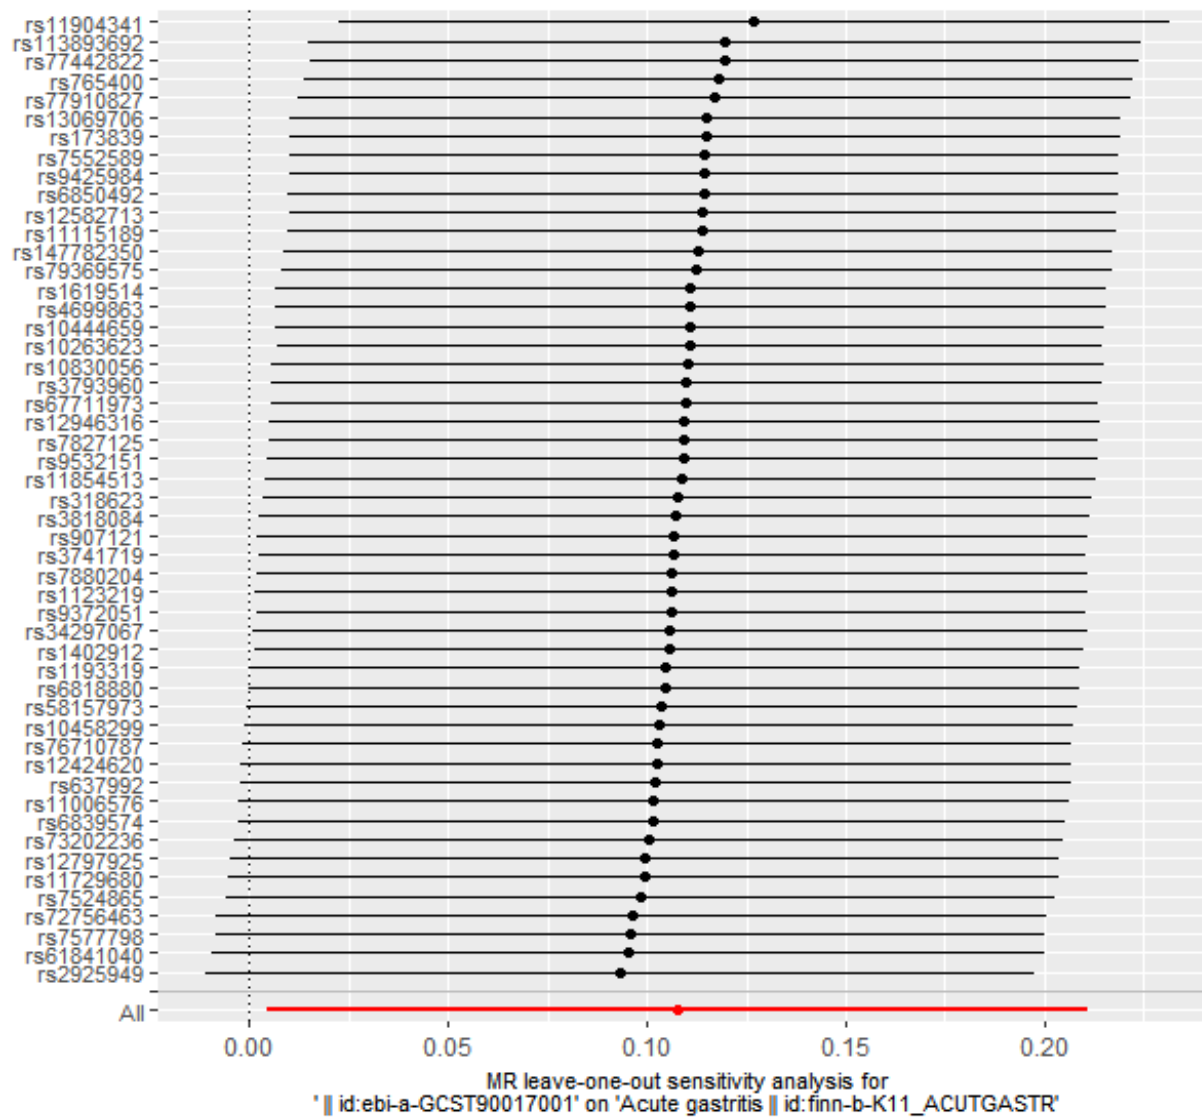

MR Method

- Inverse variance weighted
- MR Egger

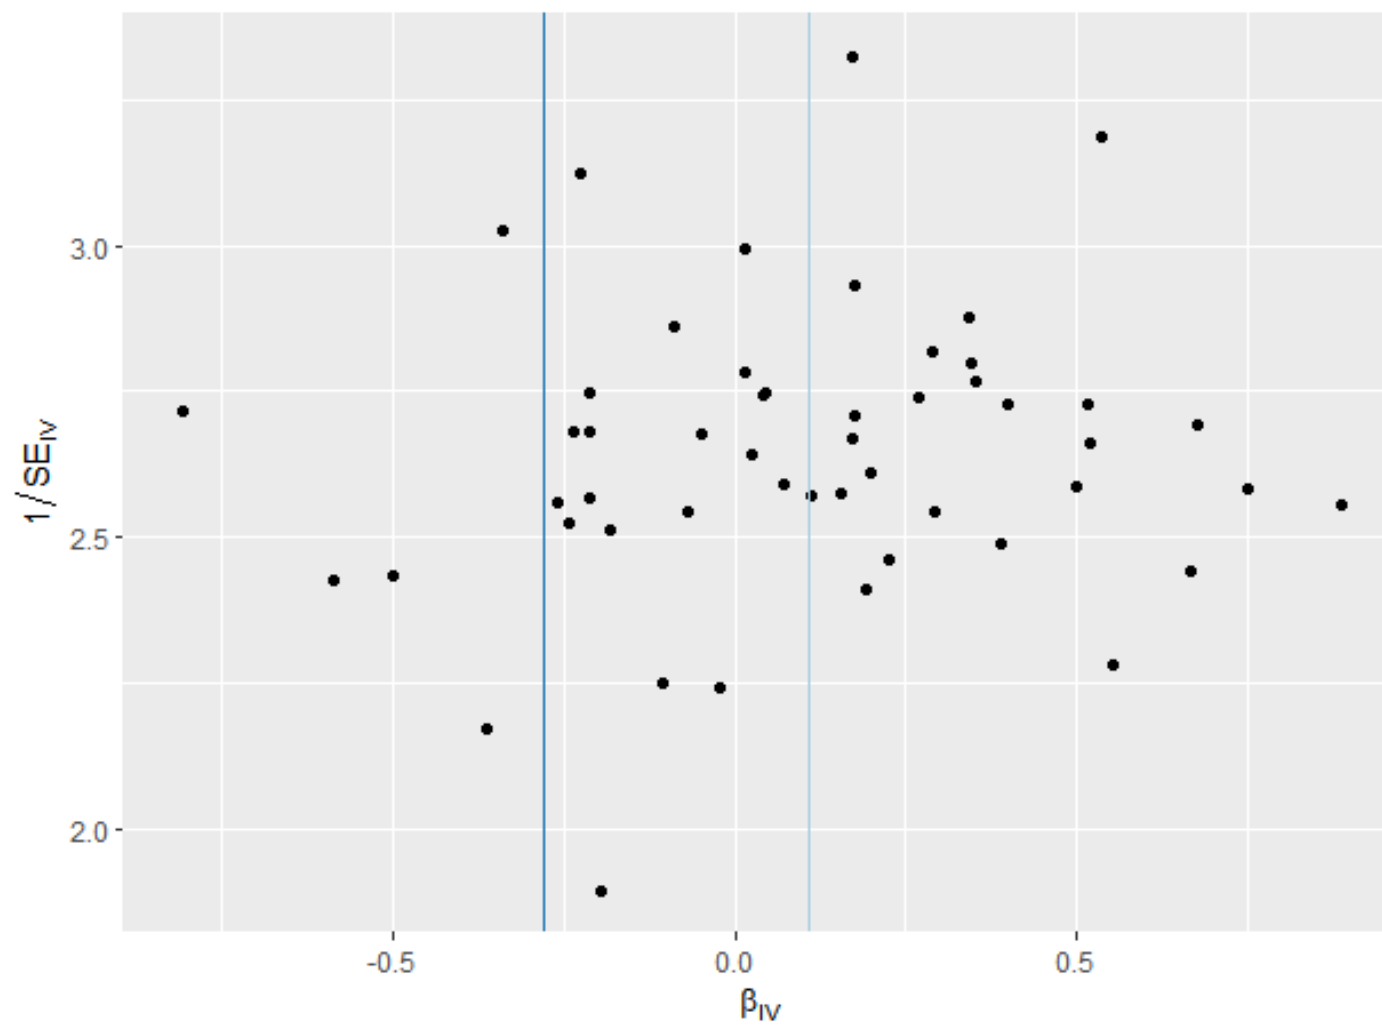

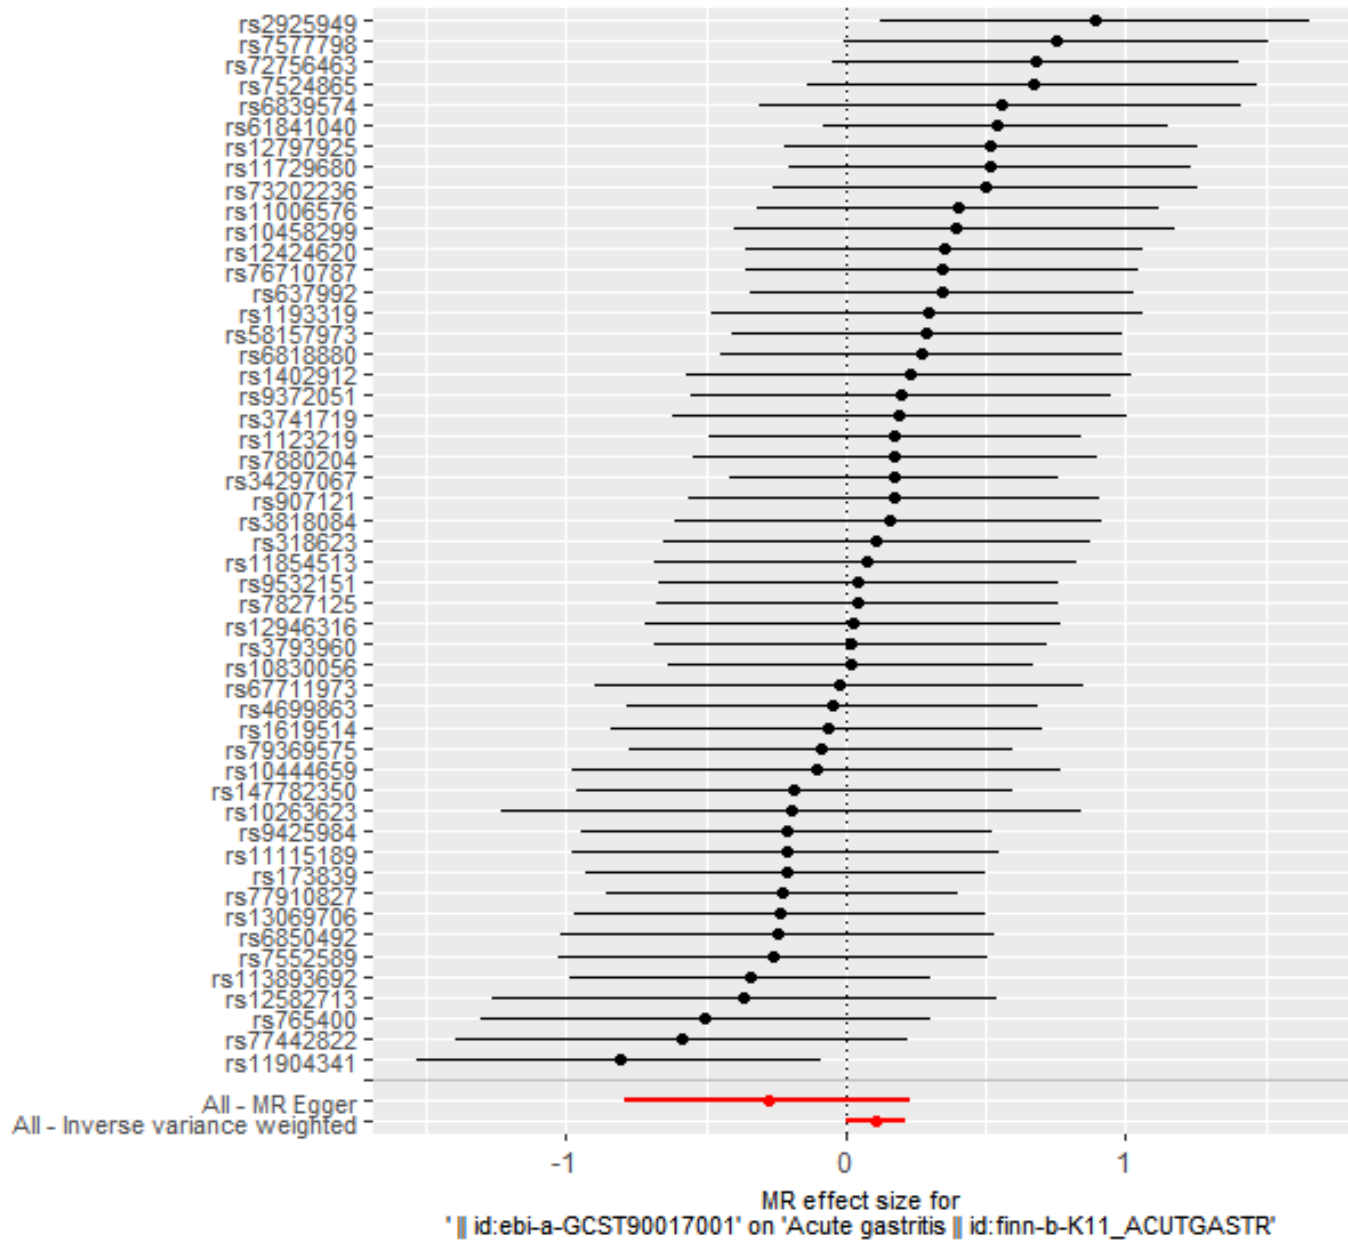

MR Test

- Inverse variance weighted
- MR Egger
- Simple mode
- Weighted median
- Weighted mode

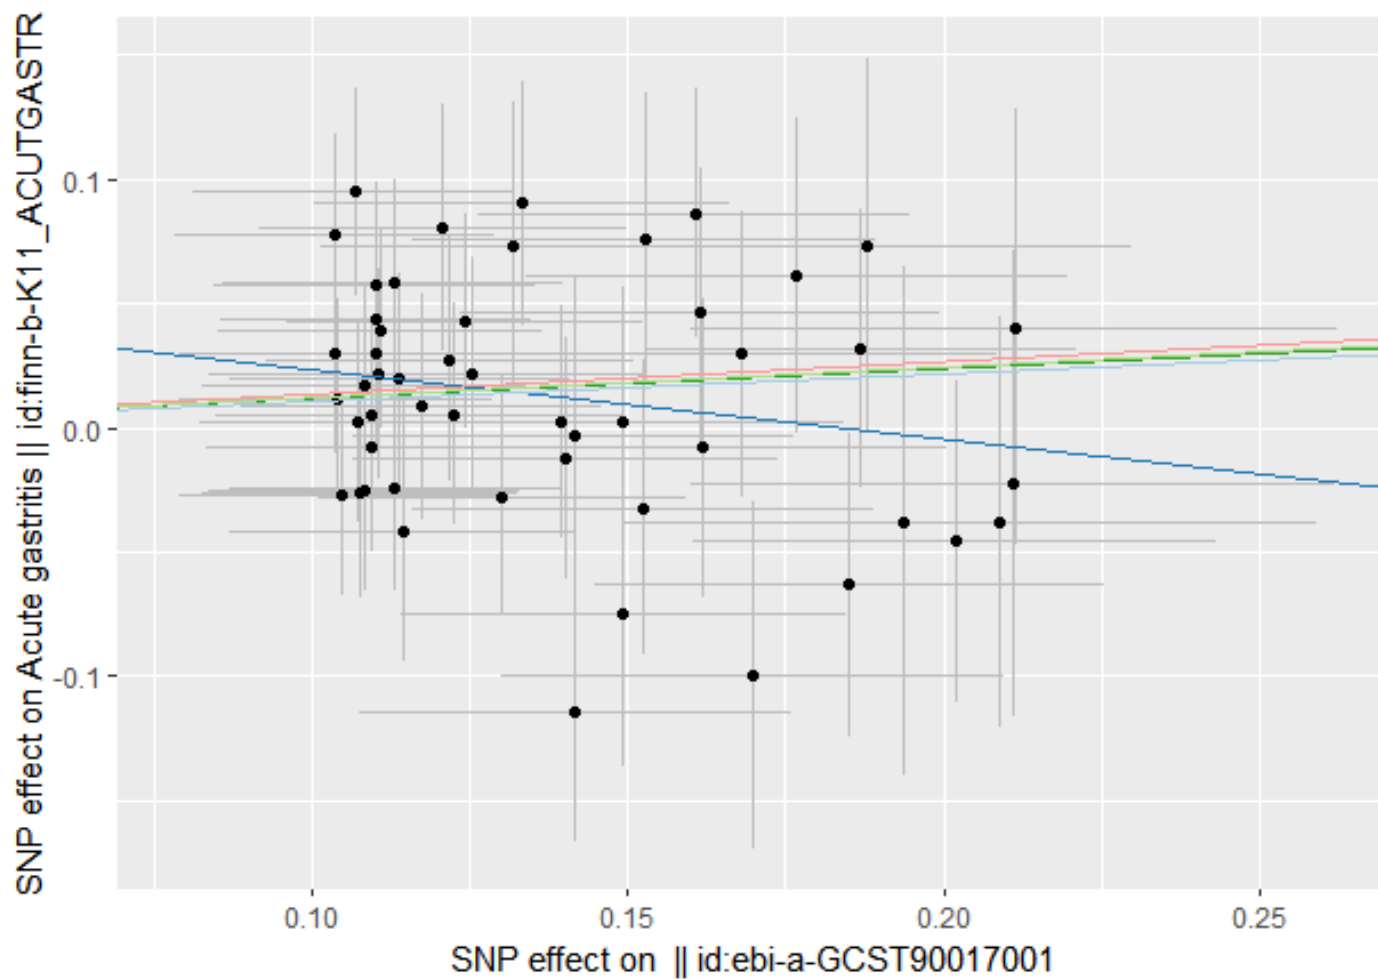

**Figure 78** Leave-one-out analysis, funnel plot, MR effect size and scatter plot for gut microbiota abundance (genus *Intestinibacter* id.11345) on acute gastritis

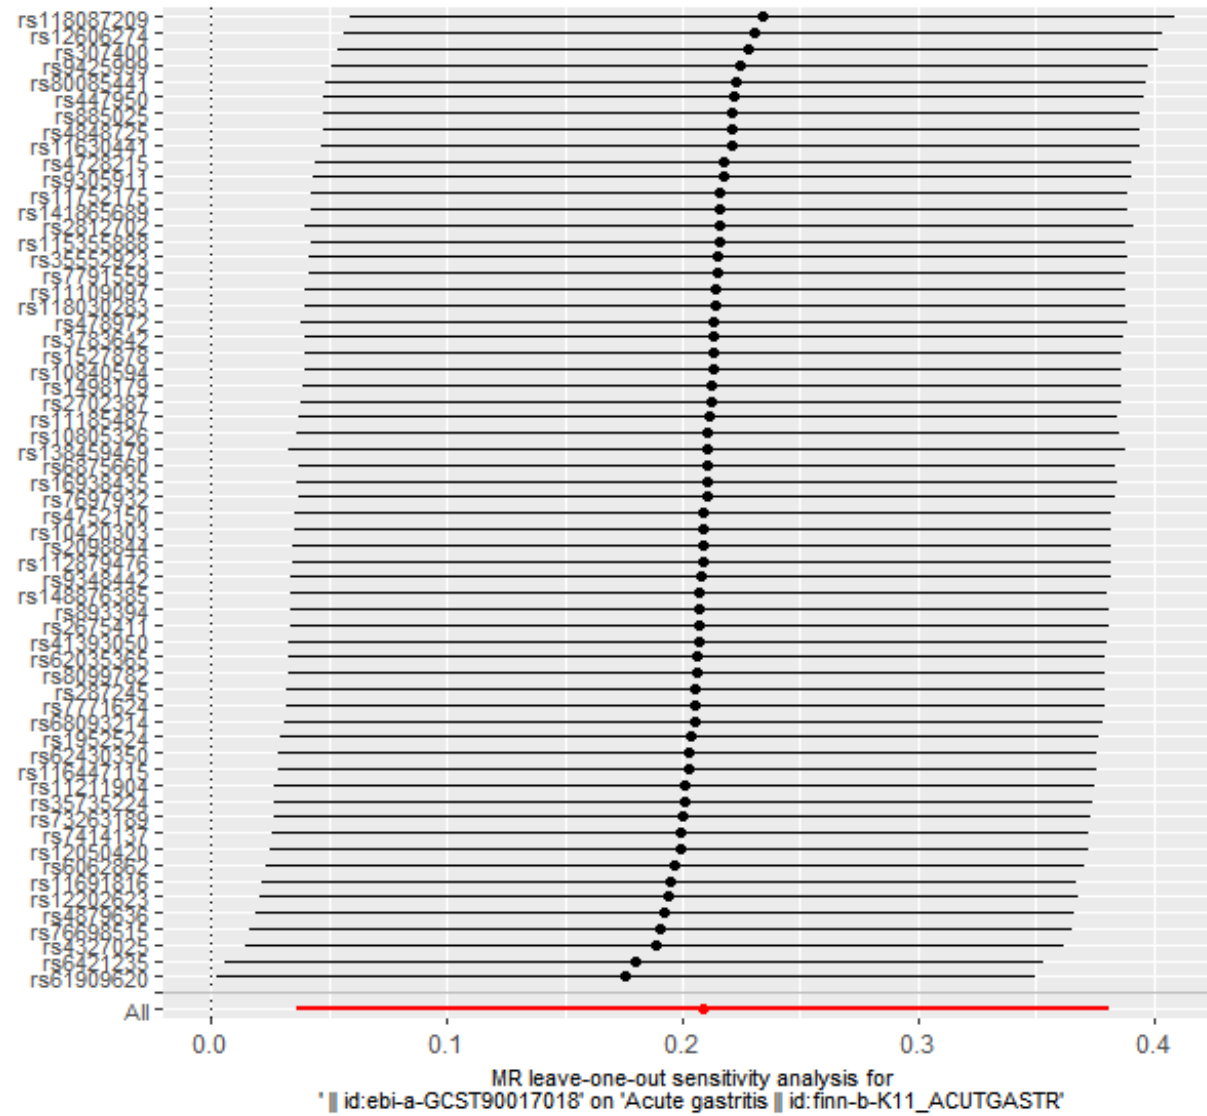

MR Method

- Inverse variance weighted
- MR Egger

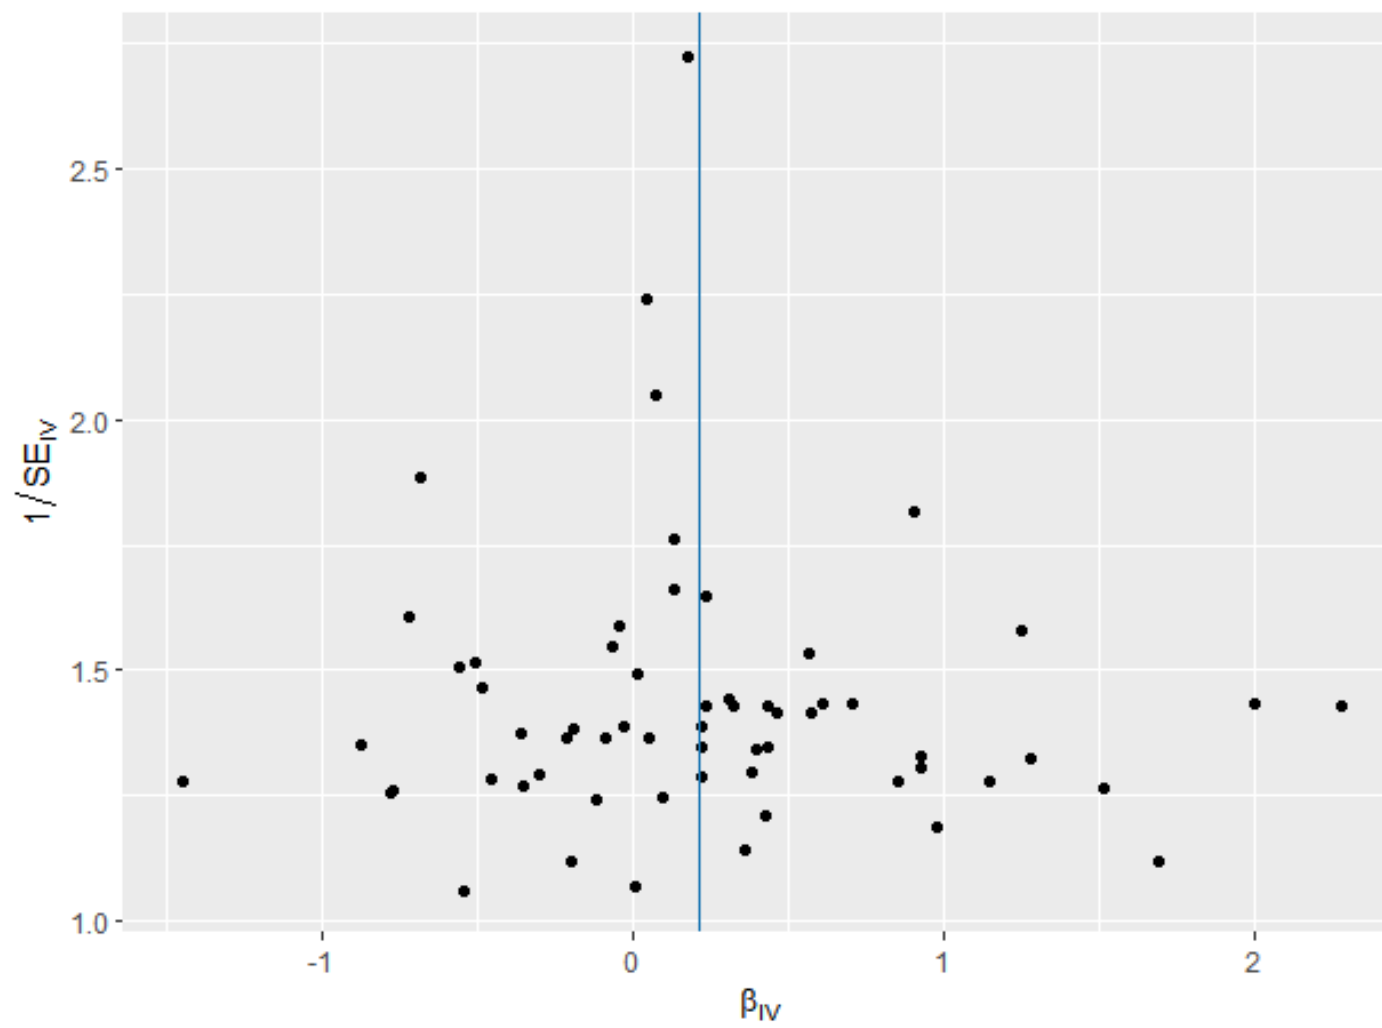

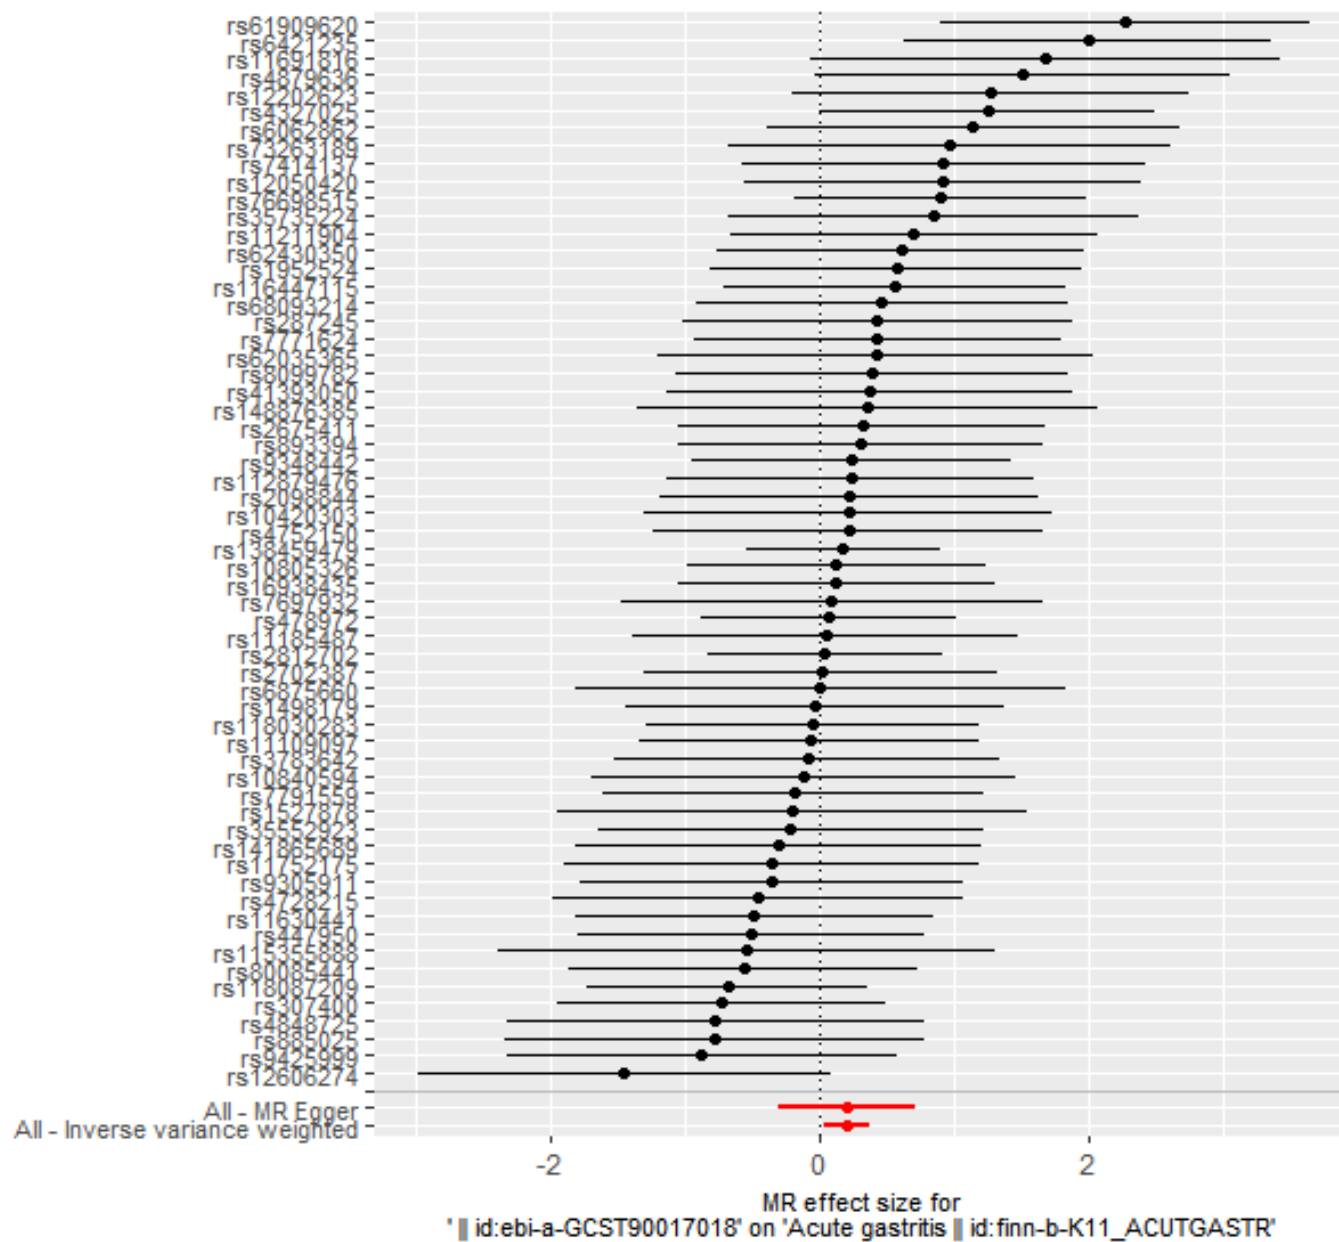

MR Test

- Inverse variance weighted
- MR Egger
- Simple mode
- Weighted median
- Weighted mode

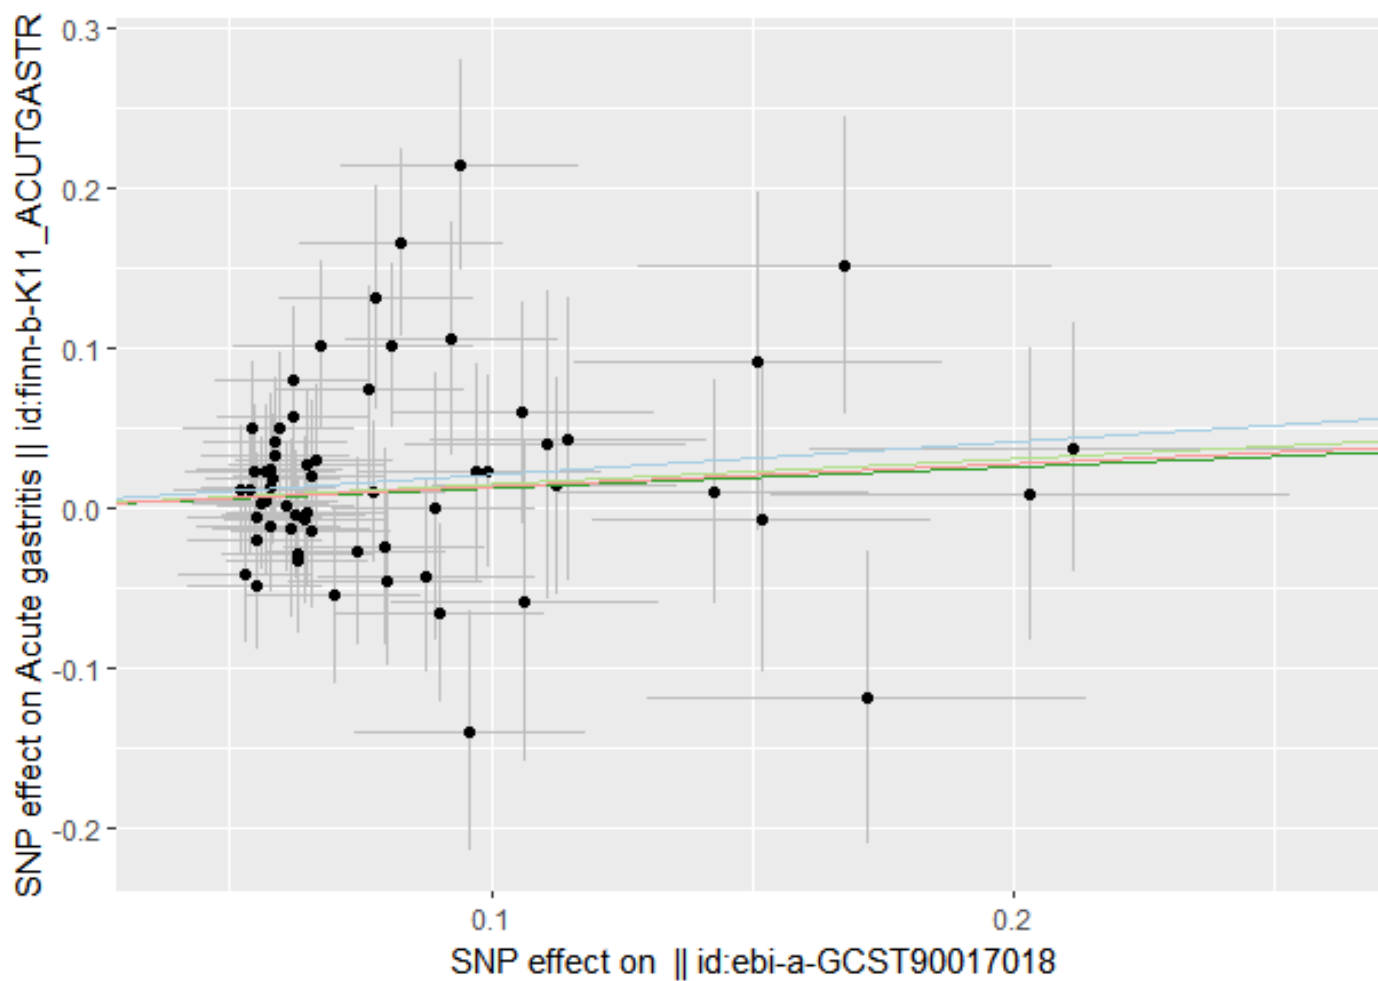



**Figure 79** Leave-one-out analysis, funnel plot, MR effect size and scatter plot for gut microbiota abundance (genus *Intestinimonas* id.2062) on acute gastritis

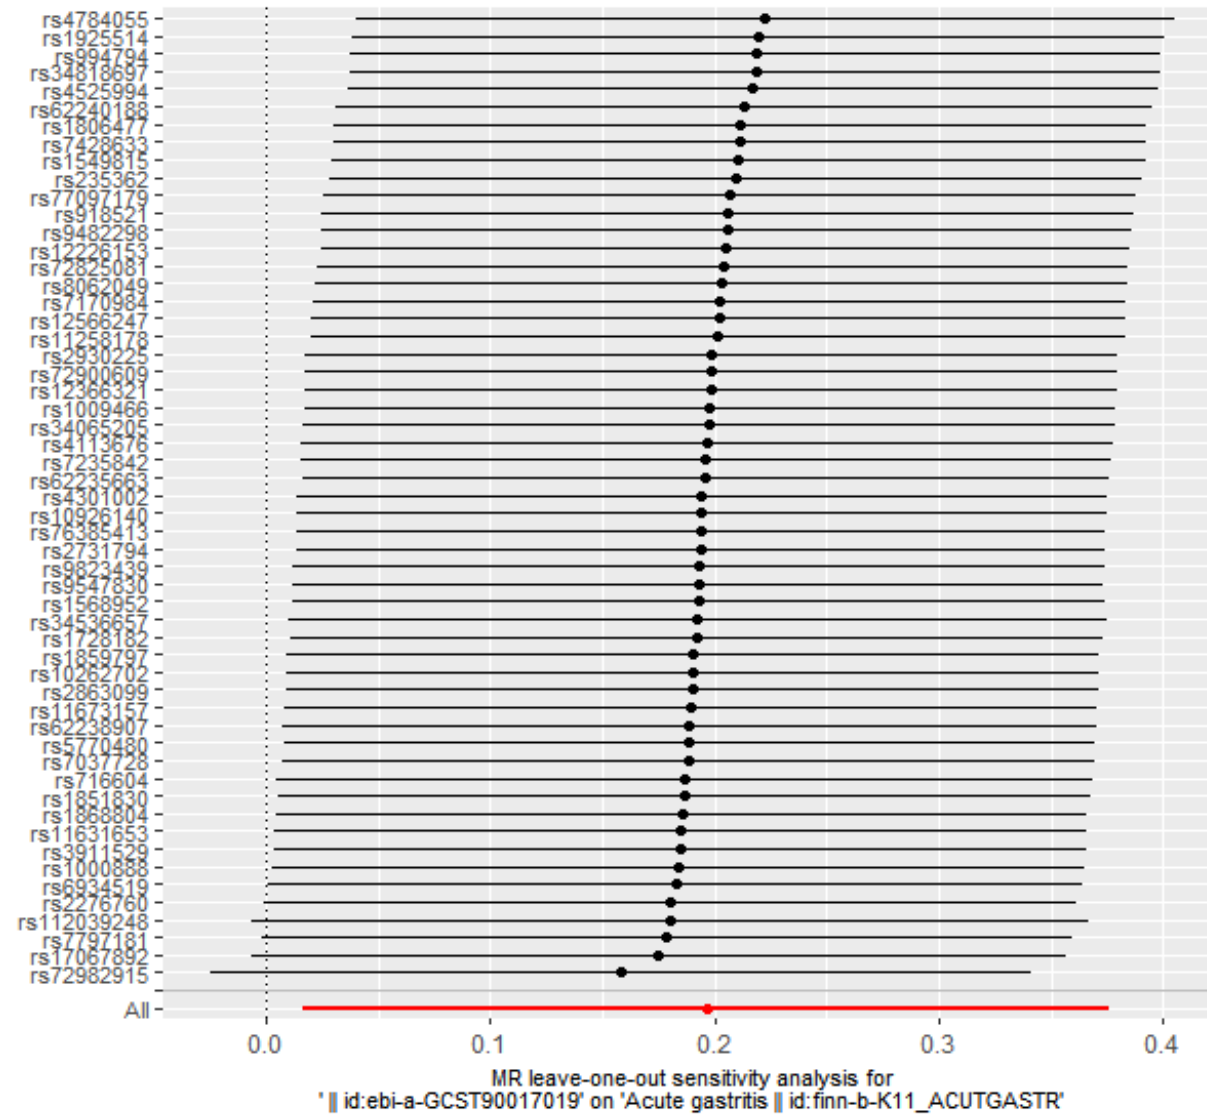

MR Method

- Inverse variance weighted
- MR Egger

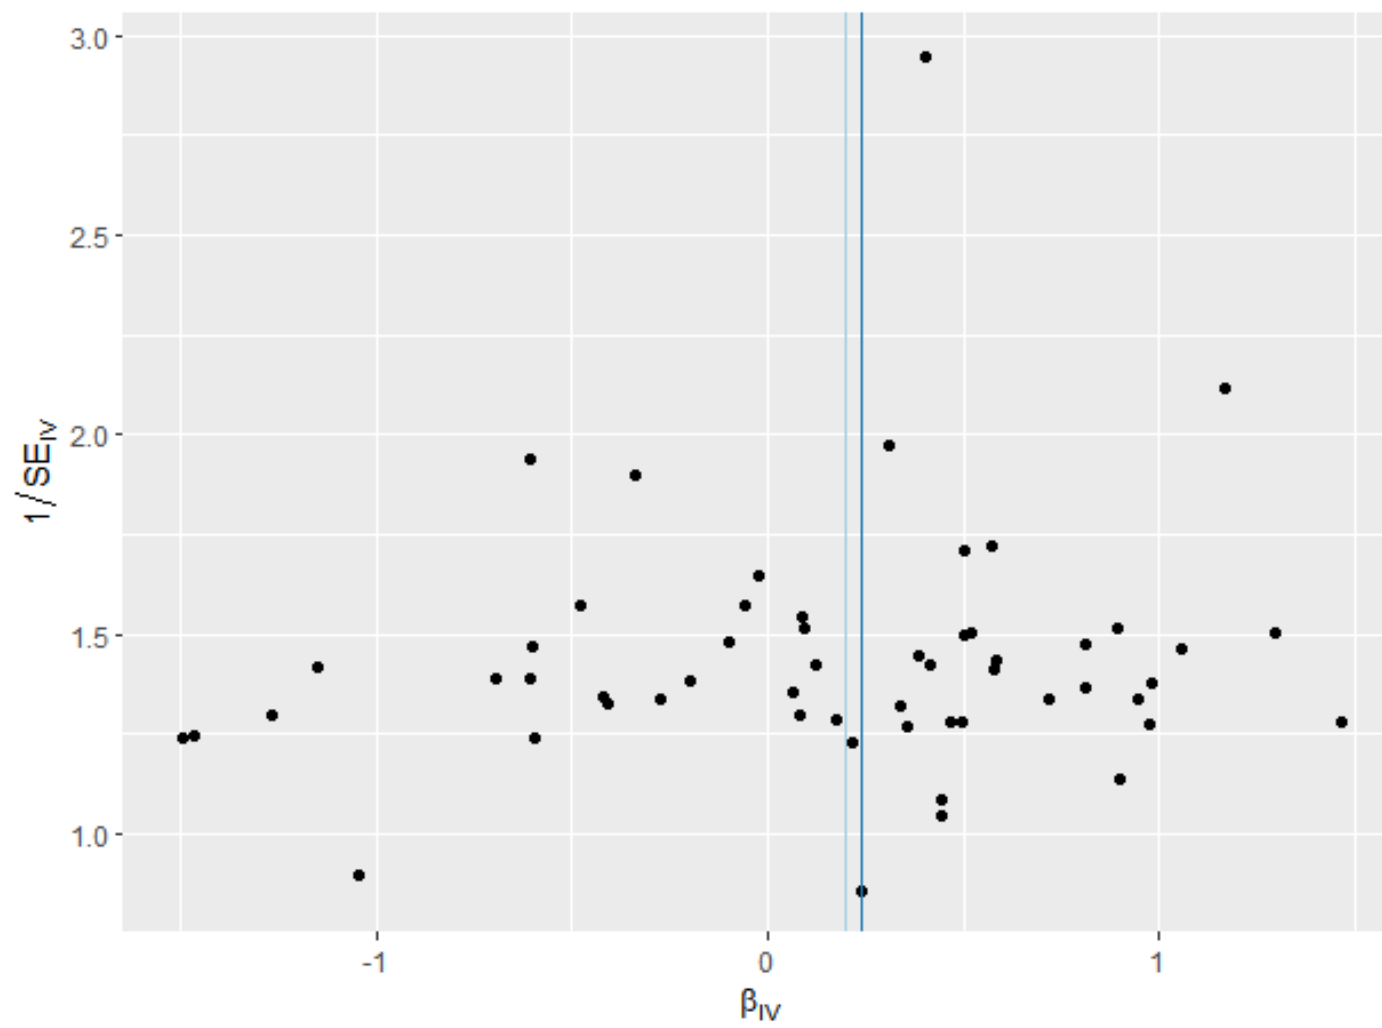

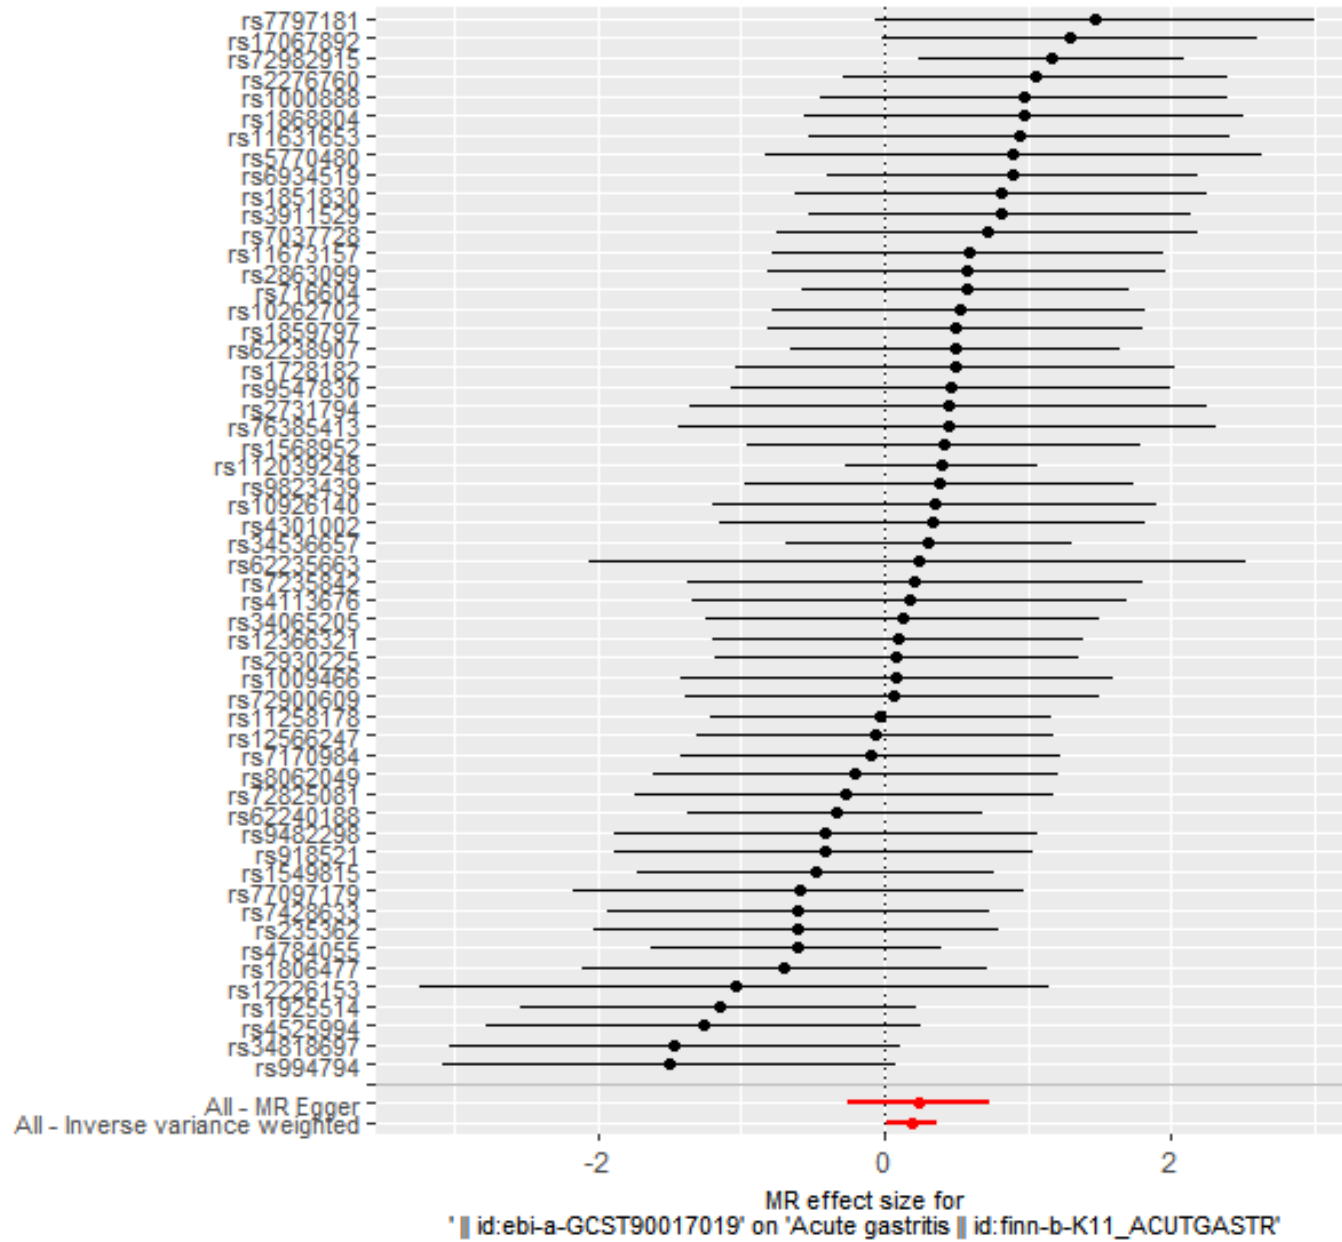

MR Test

- Inverse variance weighted
- MR Egger
- Simple mode
- Weighted median
- Weighted mode

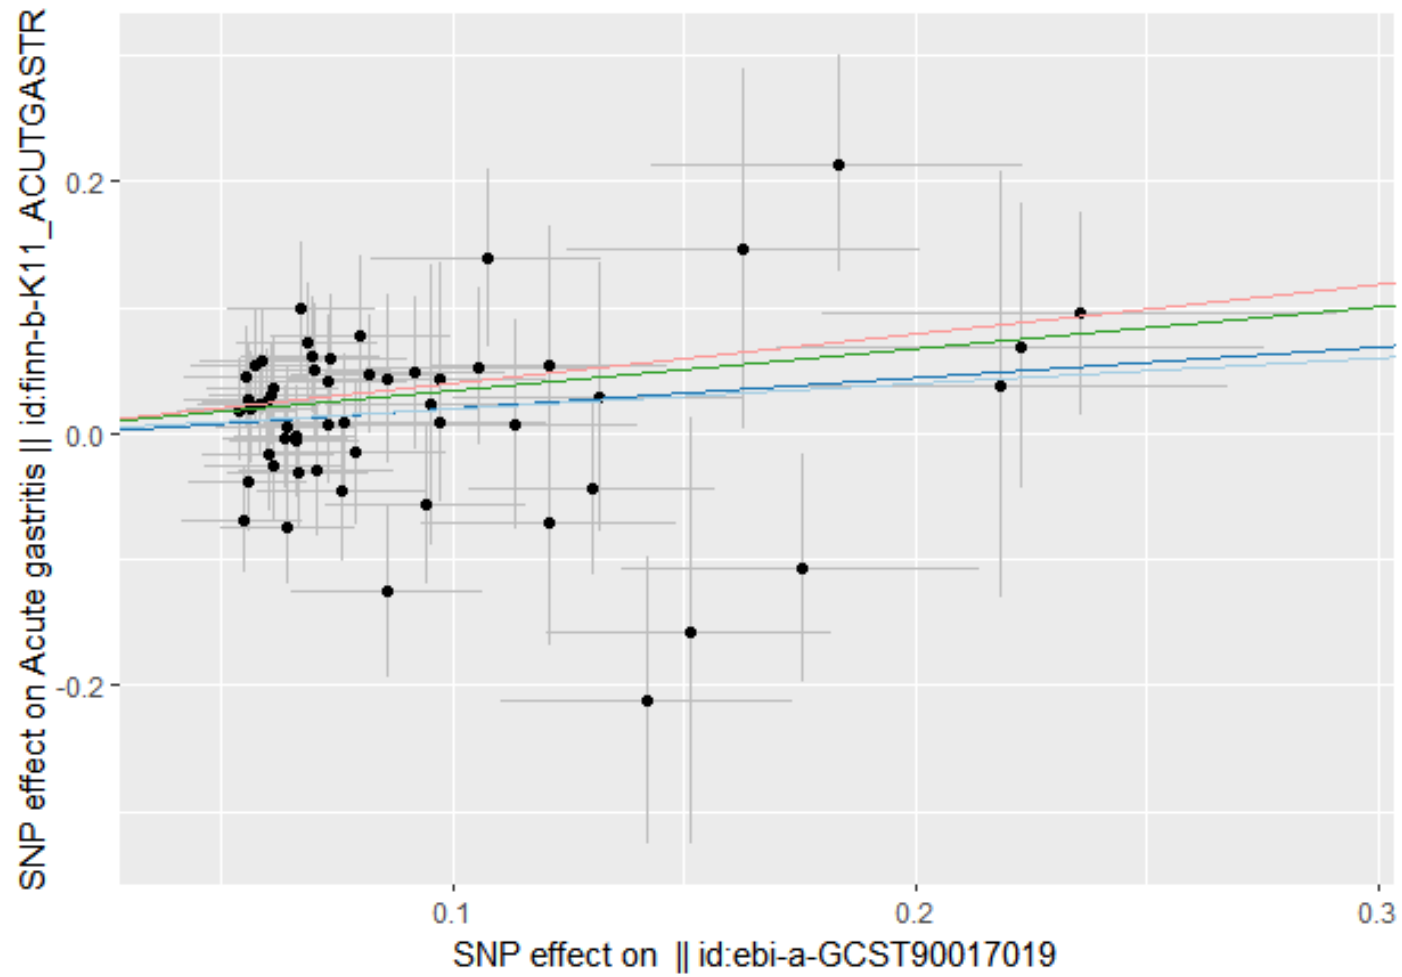

**Figure 80** Leave-one-out analysis, funnel plot, MR effect size and scatter plot for gut microbiota abundance (genus Parabacteroides id.954) on acute gastritis

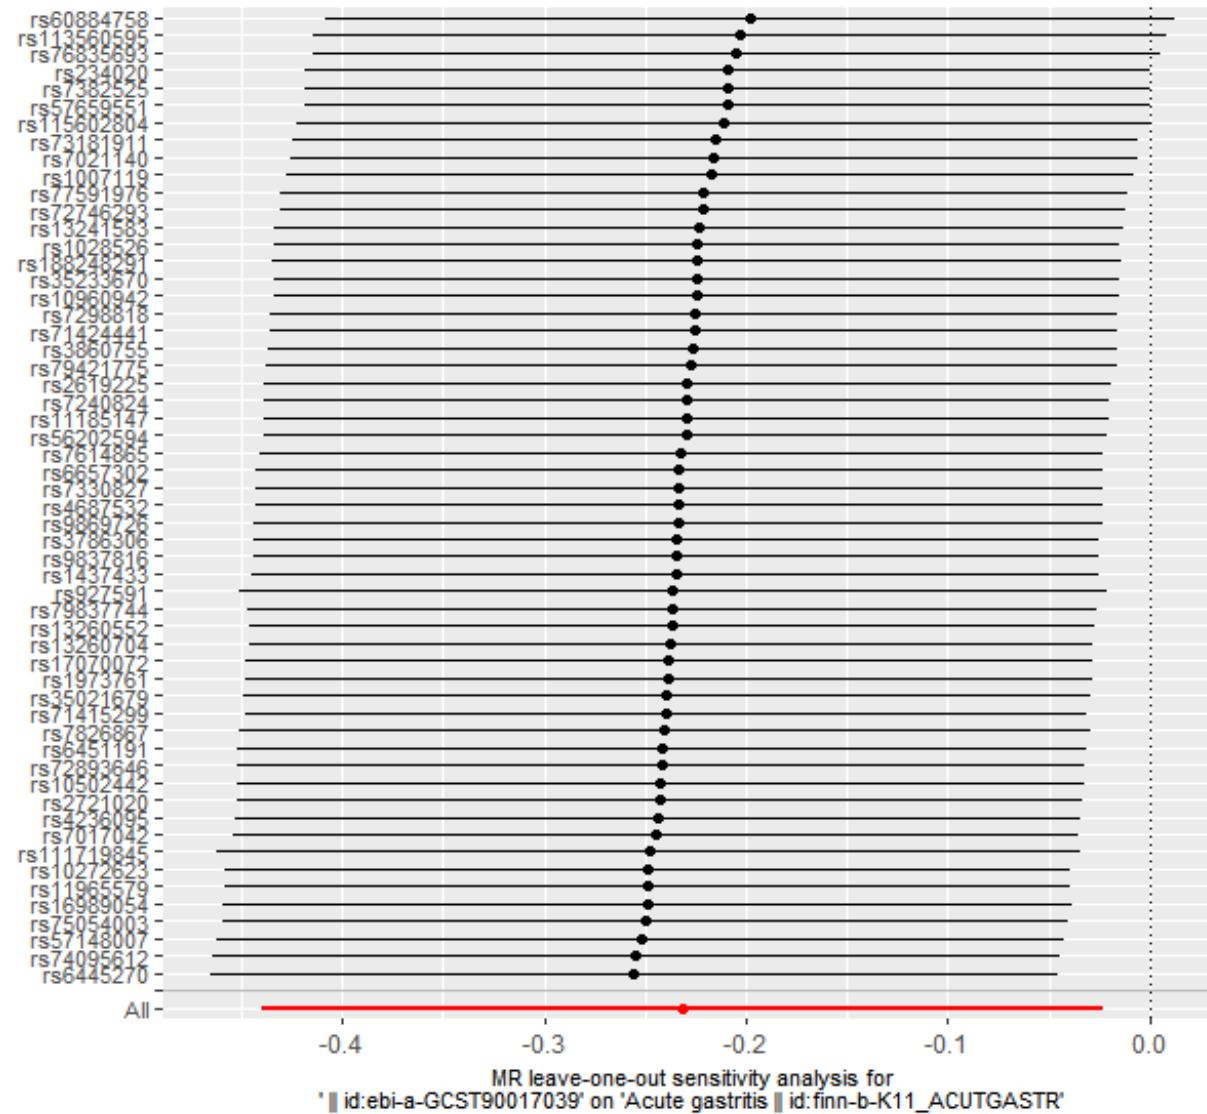

MR Method

- Inverse variance weighted
- MR Egger

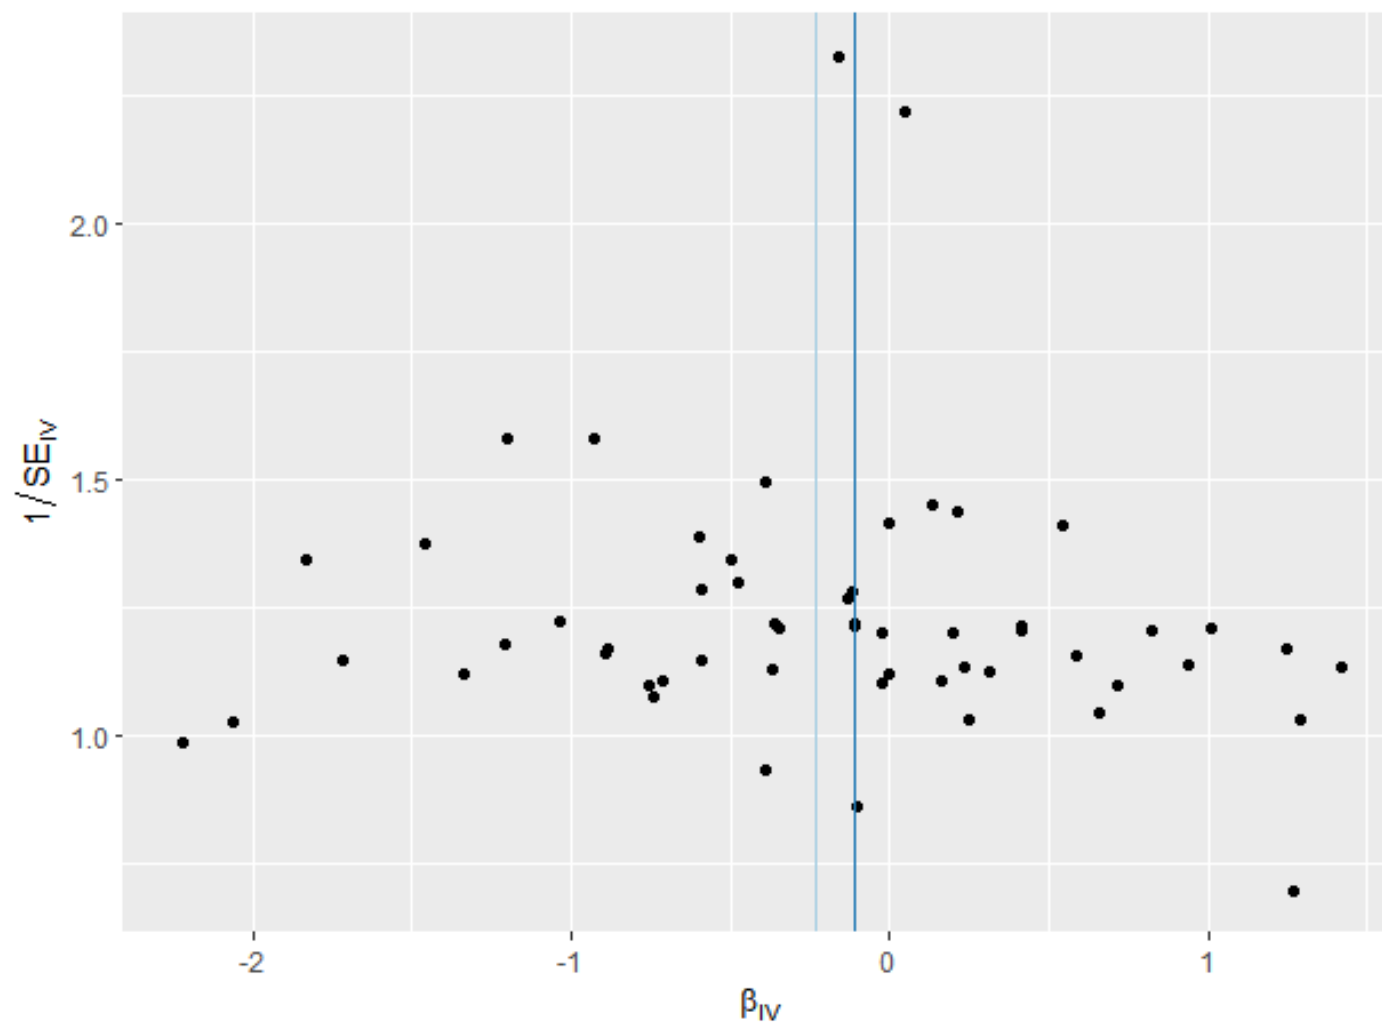

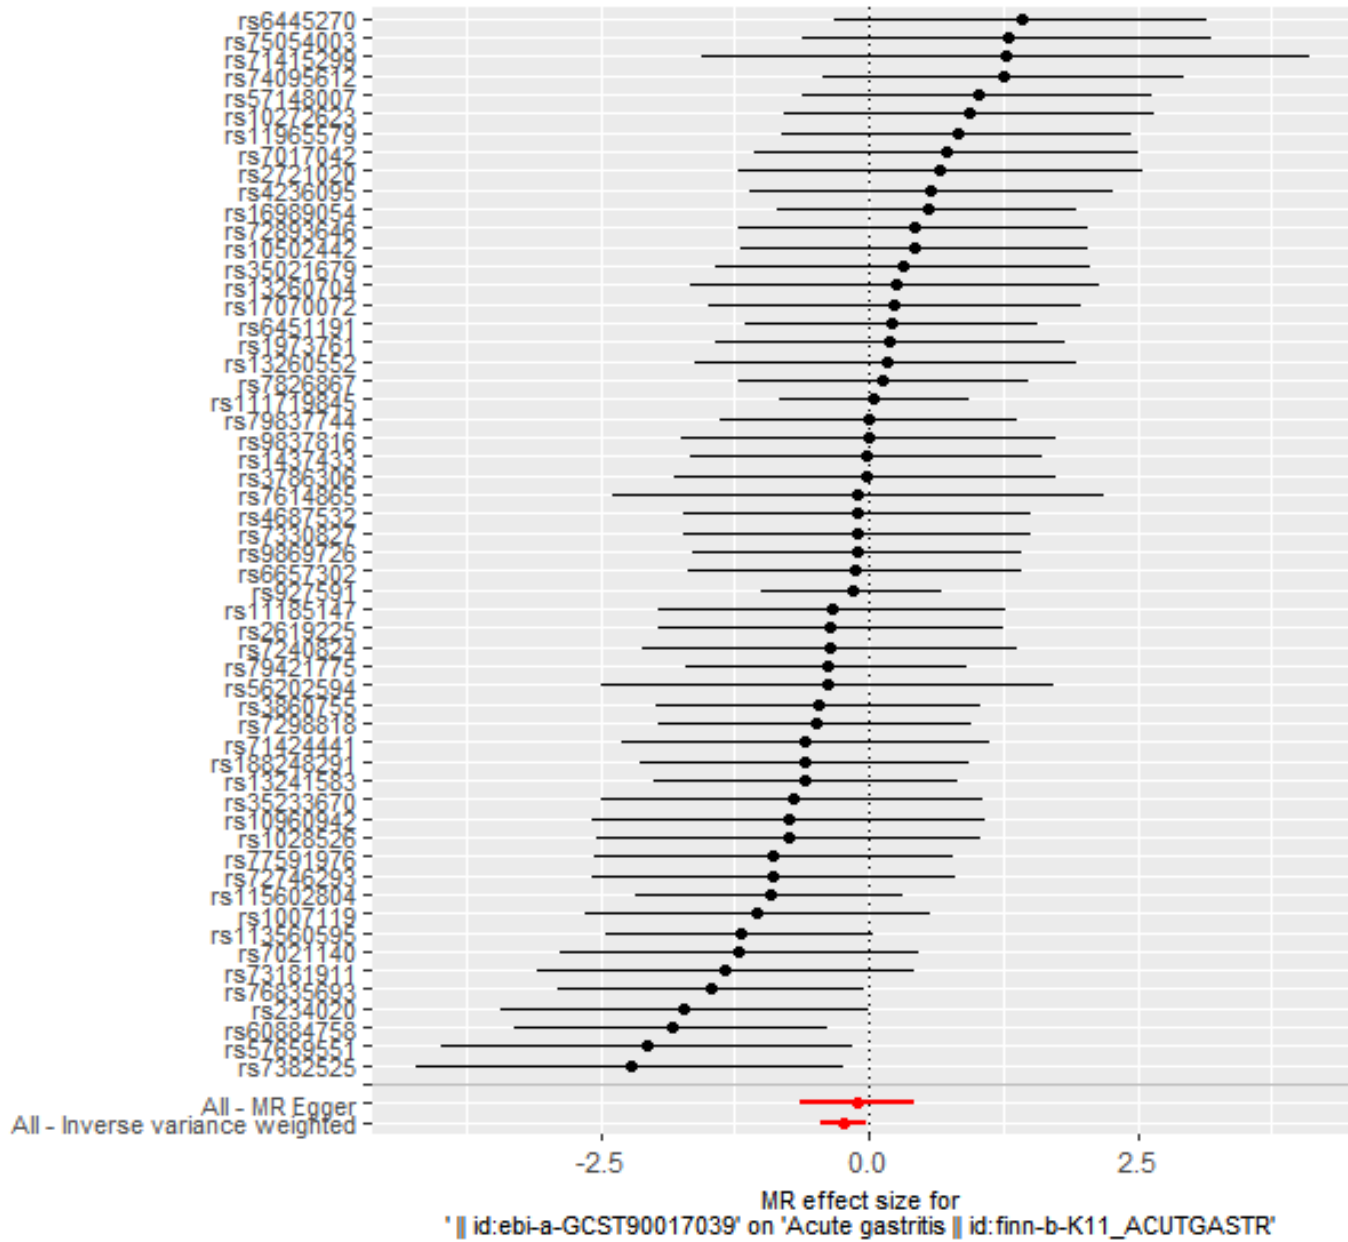

MR Test

- Inverse variance weighted
- MR Egger
- Simple mode
- Weighted median
- Weighted mode

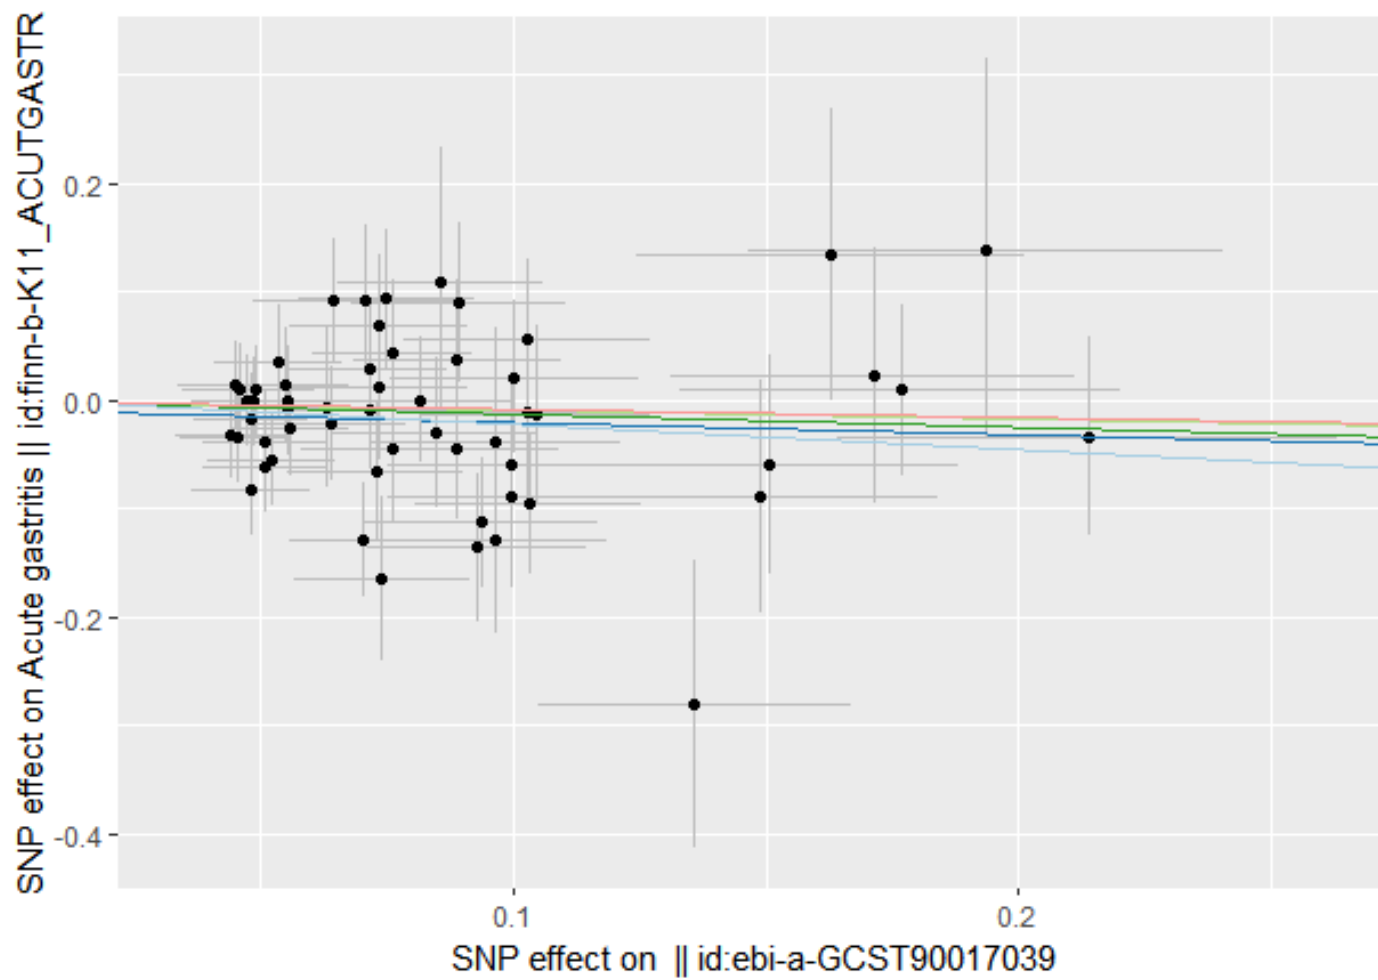



**Figure 81** Leave-one-out analysis, funnel plot, MR effect size and scatter plot for gut microbiota abundance (genus Ruminococcaceae NK4A214 group id.11358) on acute gastritis

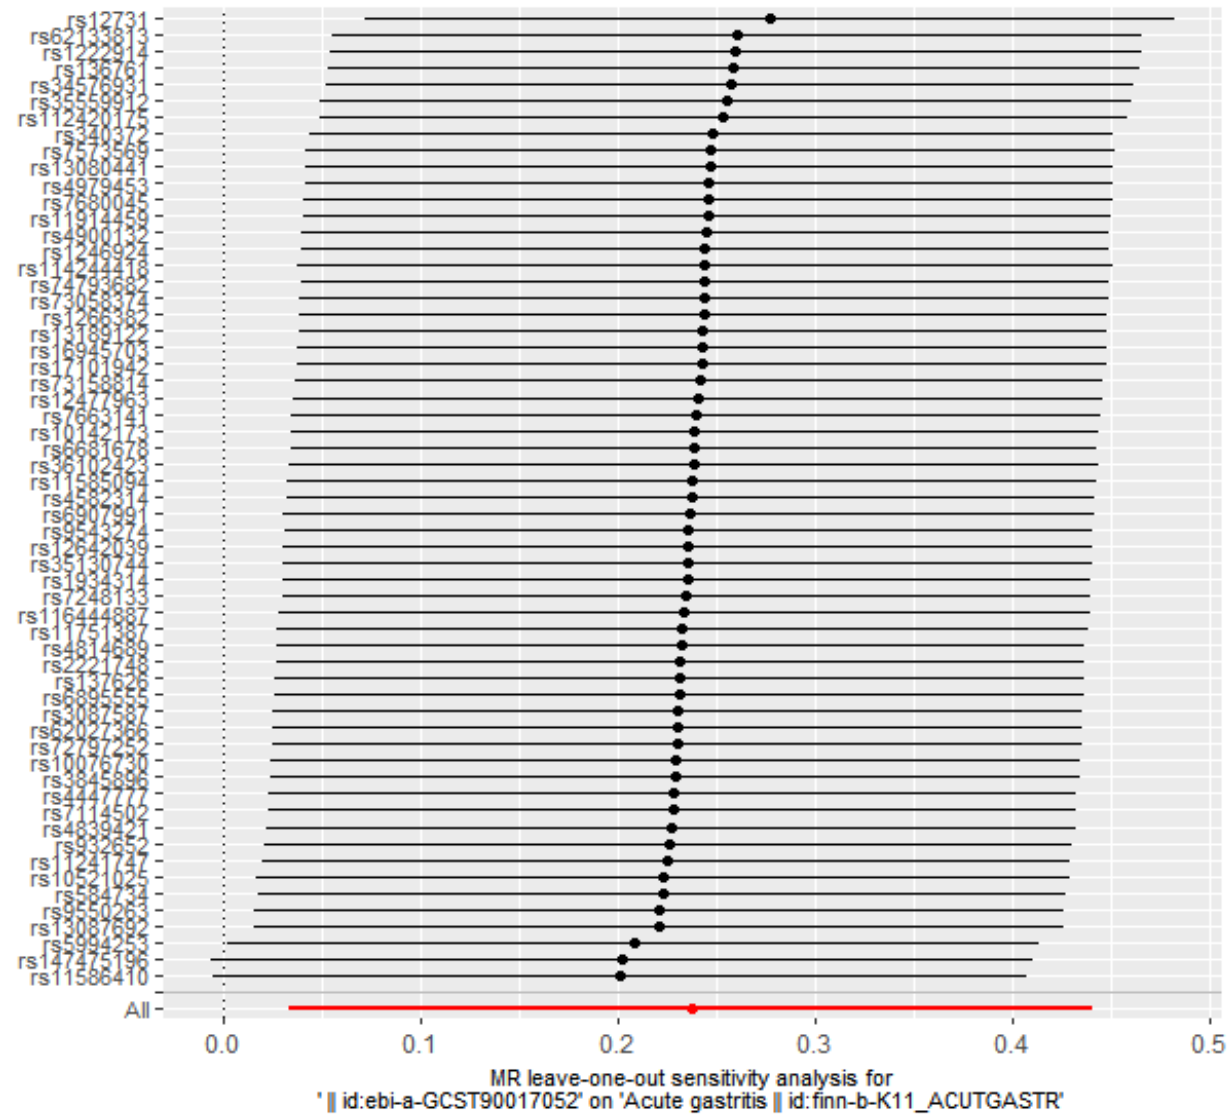

MR Method

- Inverse variance weighted
- MR Egger

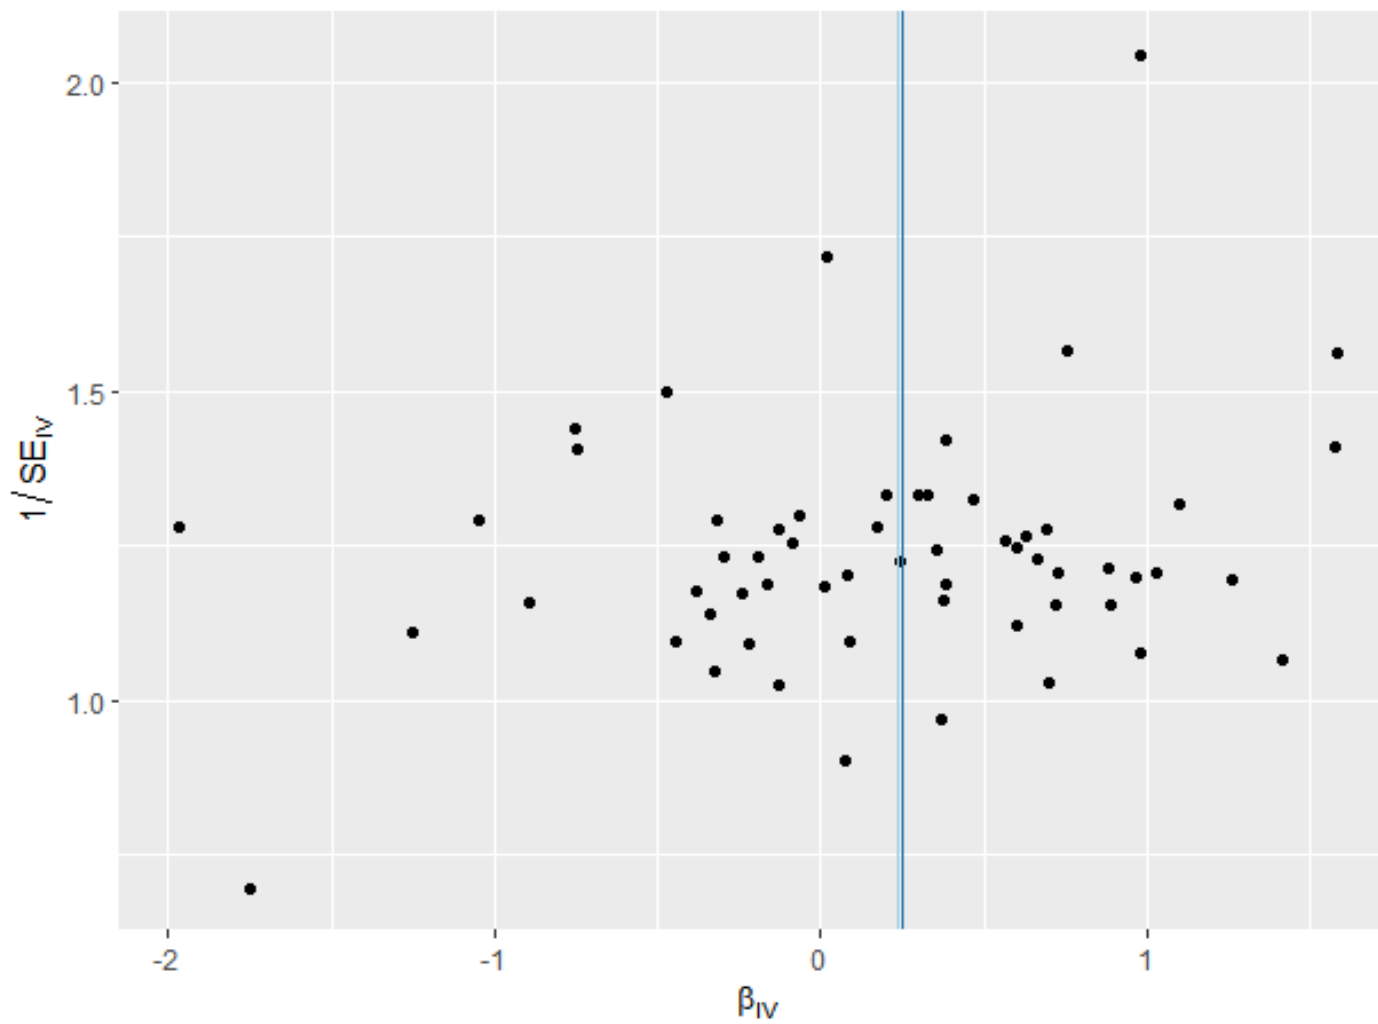



### MR Test

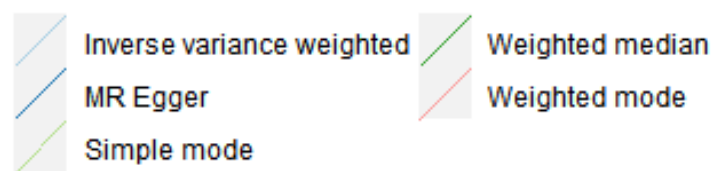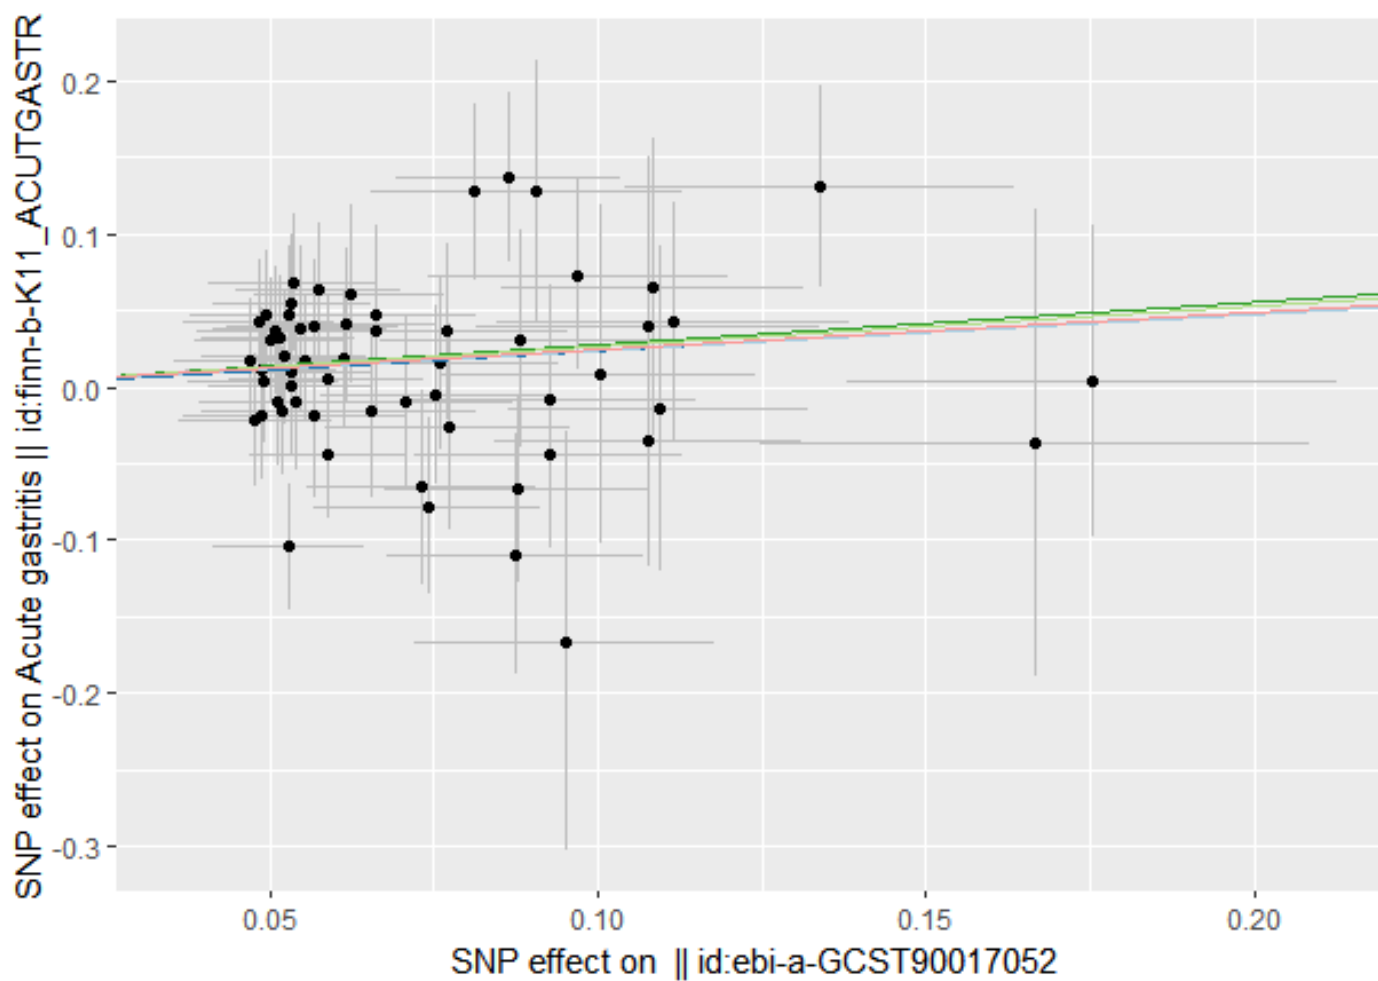

**Figure 82** Leave-one-out analysis, funnel plot, MR effect size and scatter plot for gut microbiota abundance (phylum Verrucomicrobia id.3982) on acute gastritis

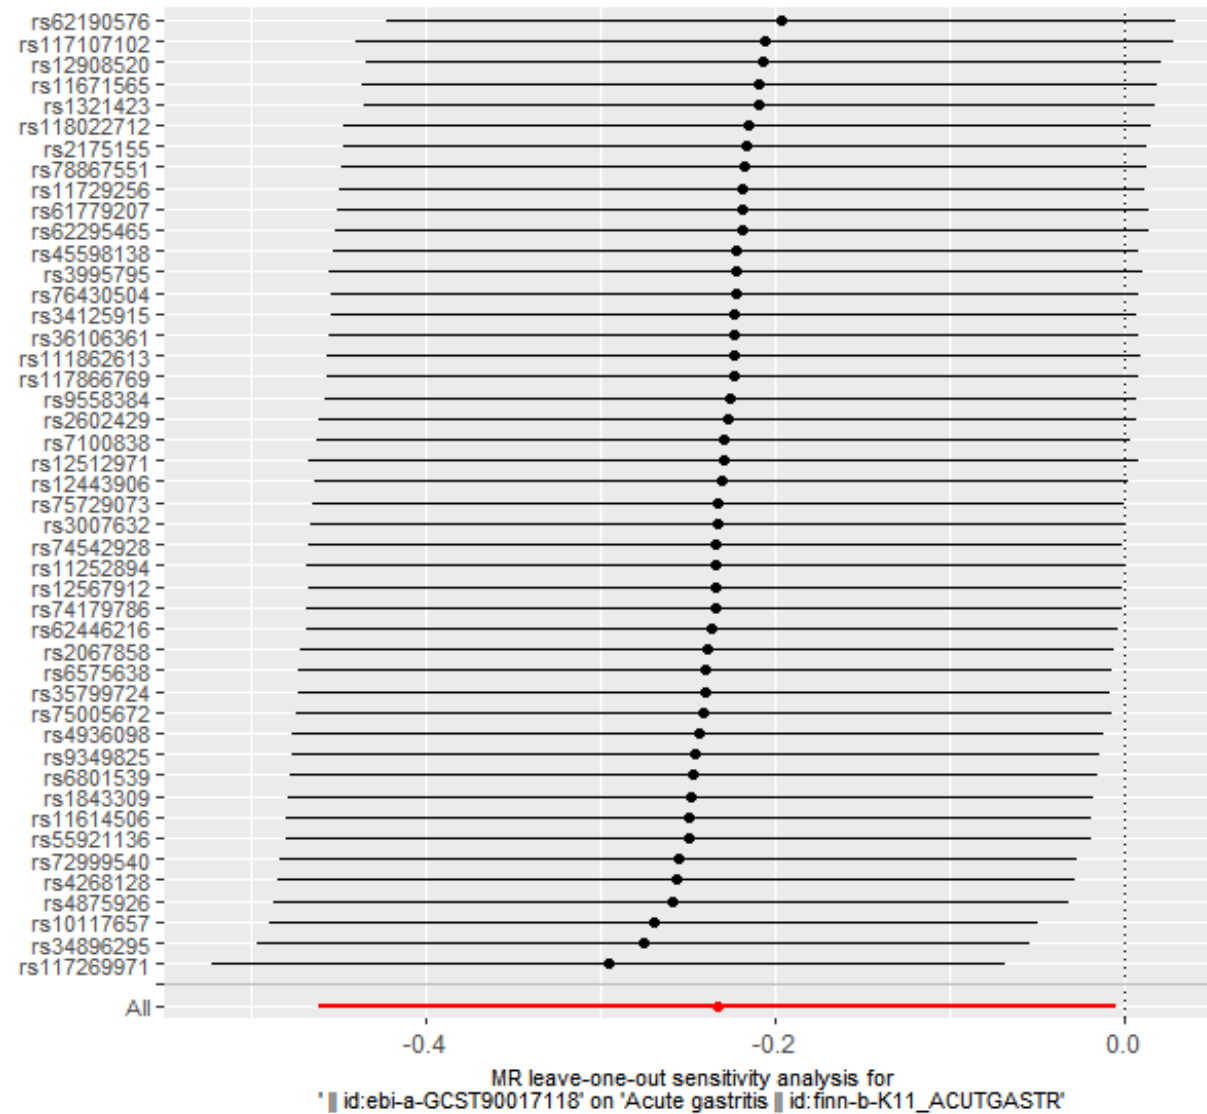

MR Method

- Inverse variance weighted
- MR Egger

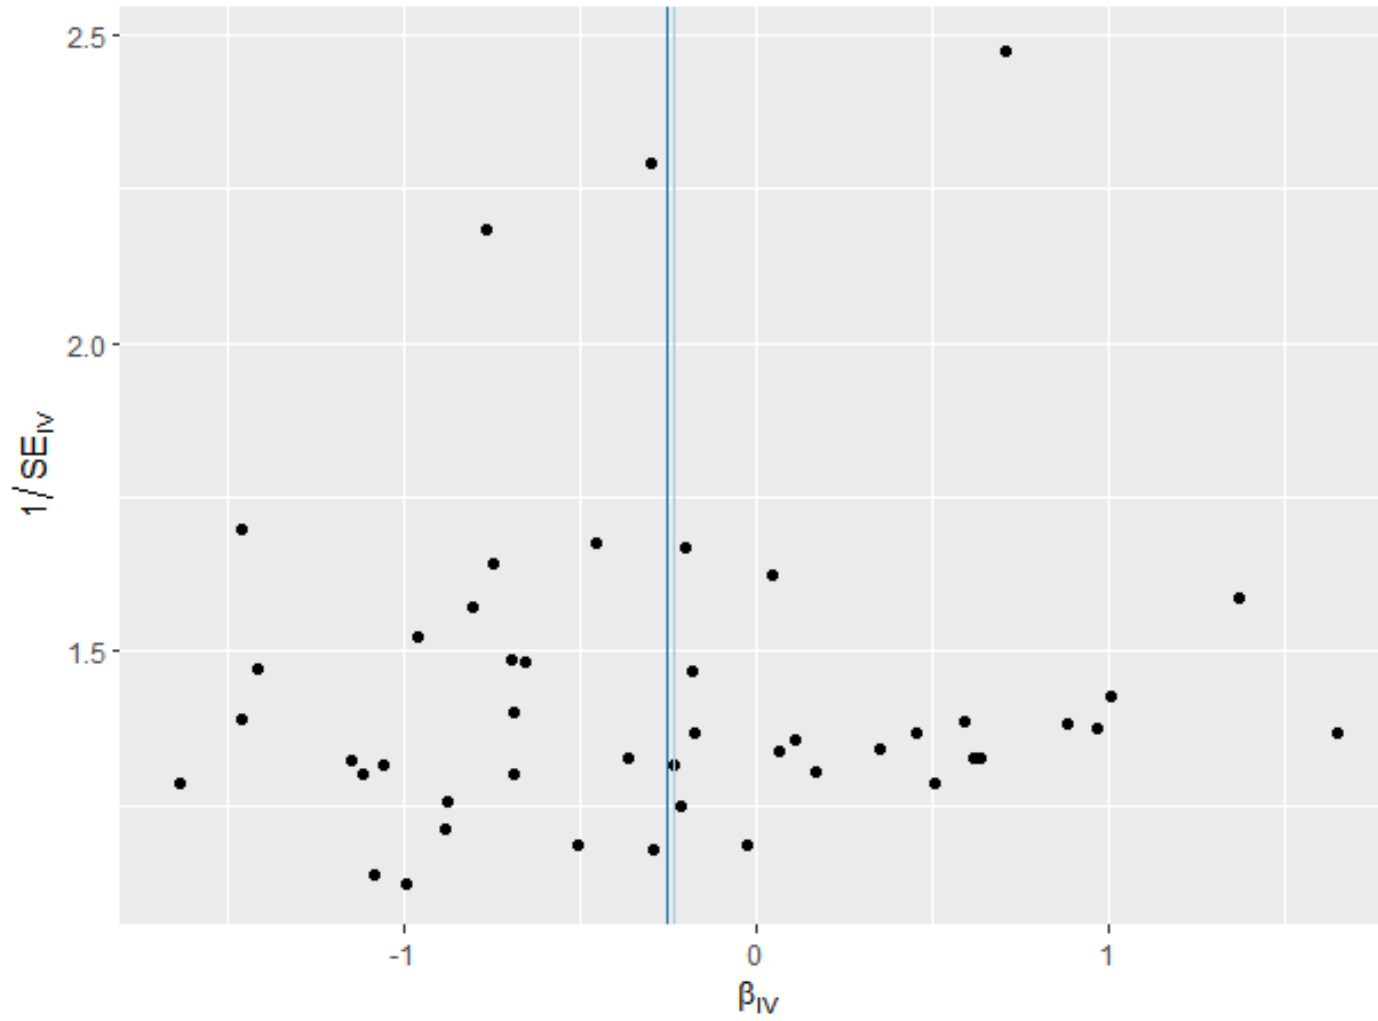

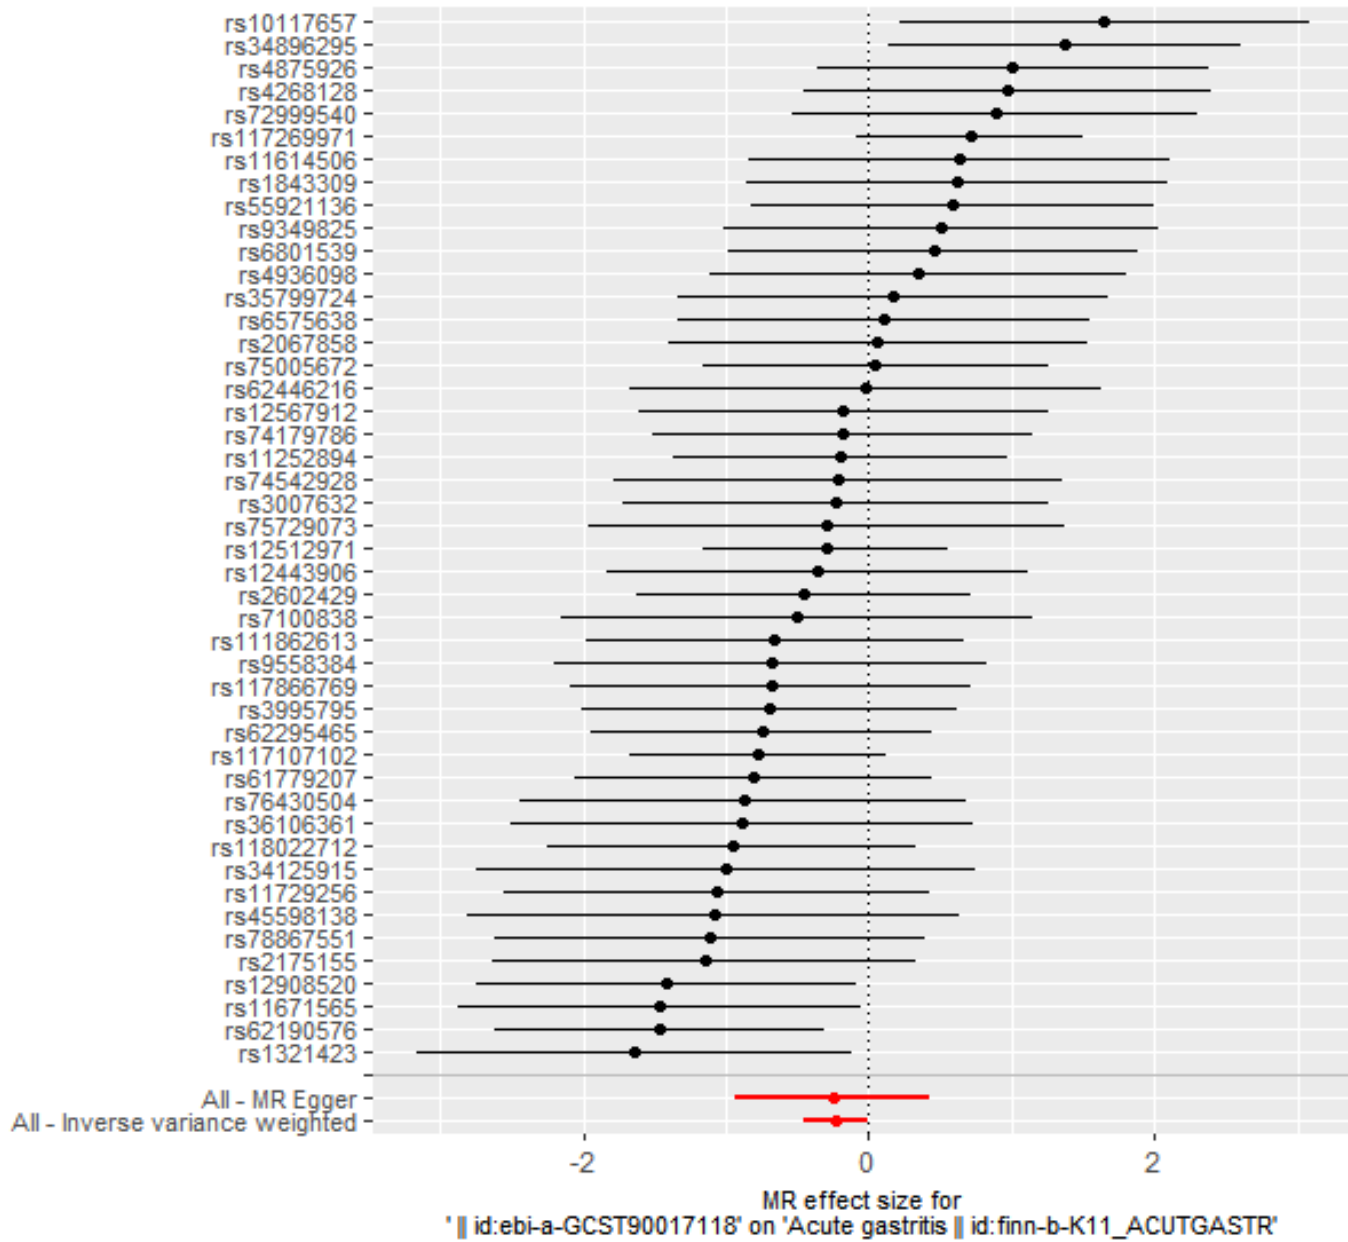

MR Test

- Inverse variance weighted
- MR Egger
- Simple mode
- Weighted median
- Weighted mode

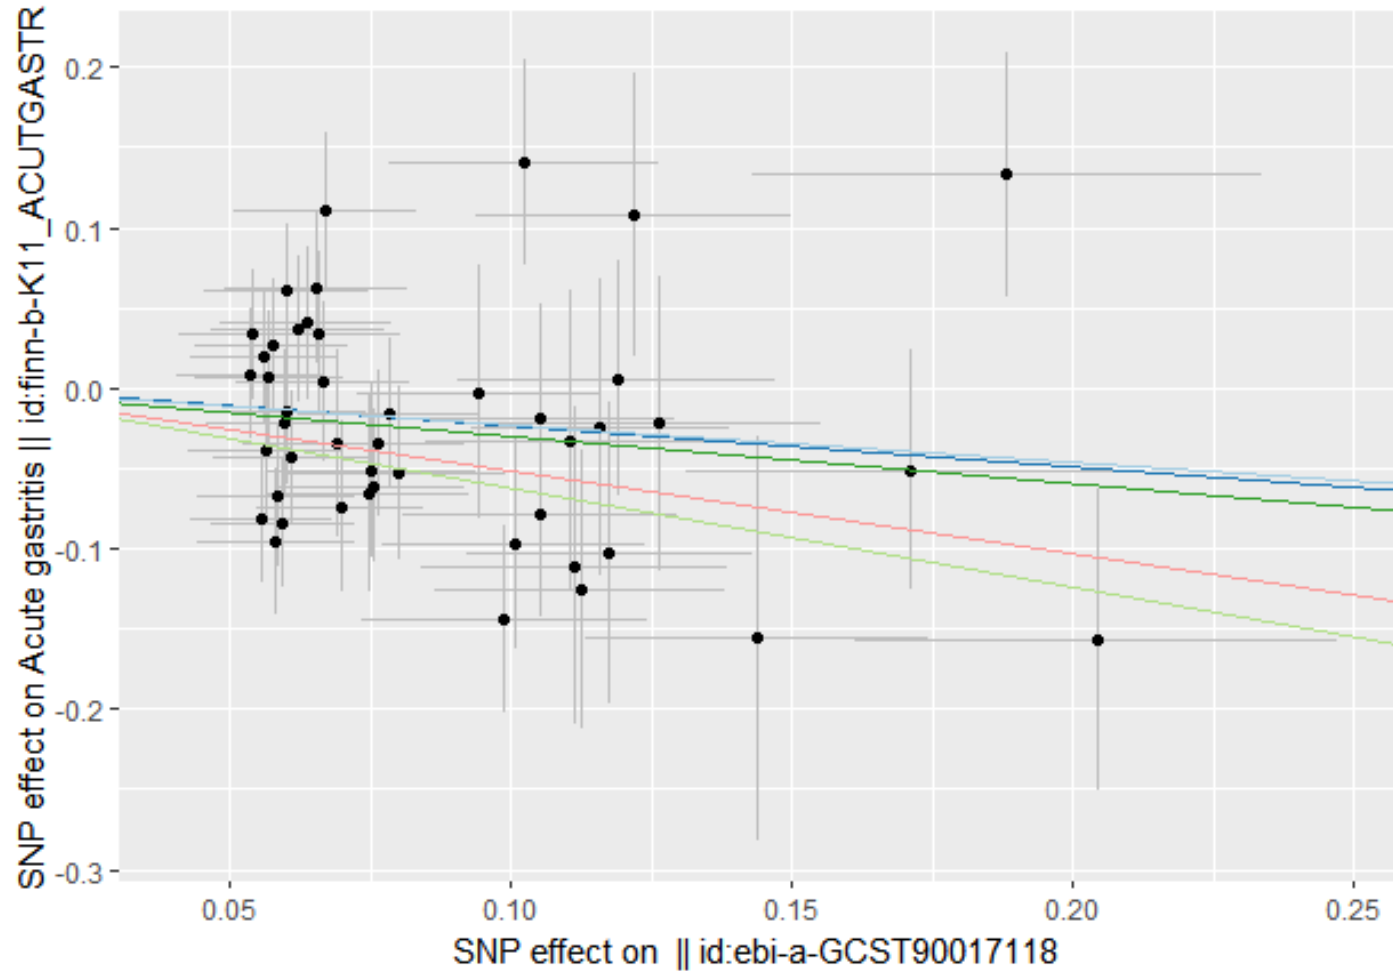



**Figure 83** Leave-one-out analysis, funnel plot, MR effect size and scatter plot for gut microbiota abundance (class Deltaproteobacteria id.3087) on gastric cancer

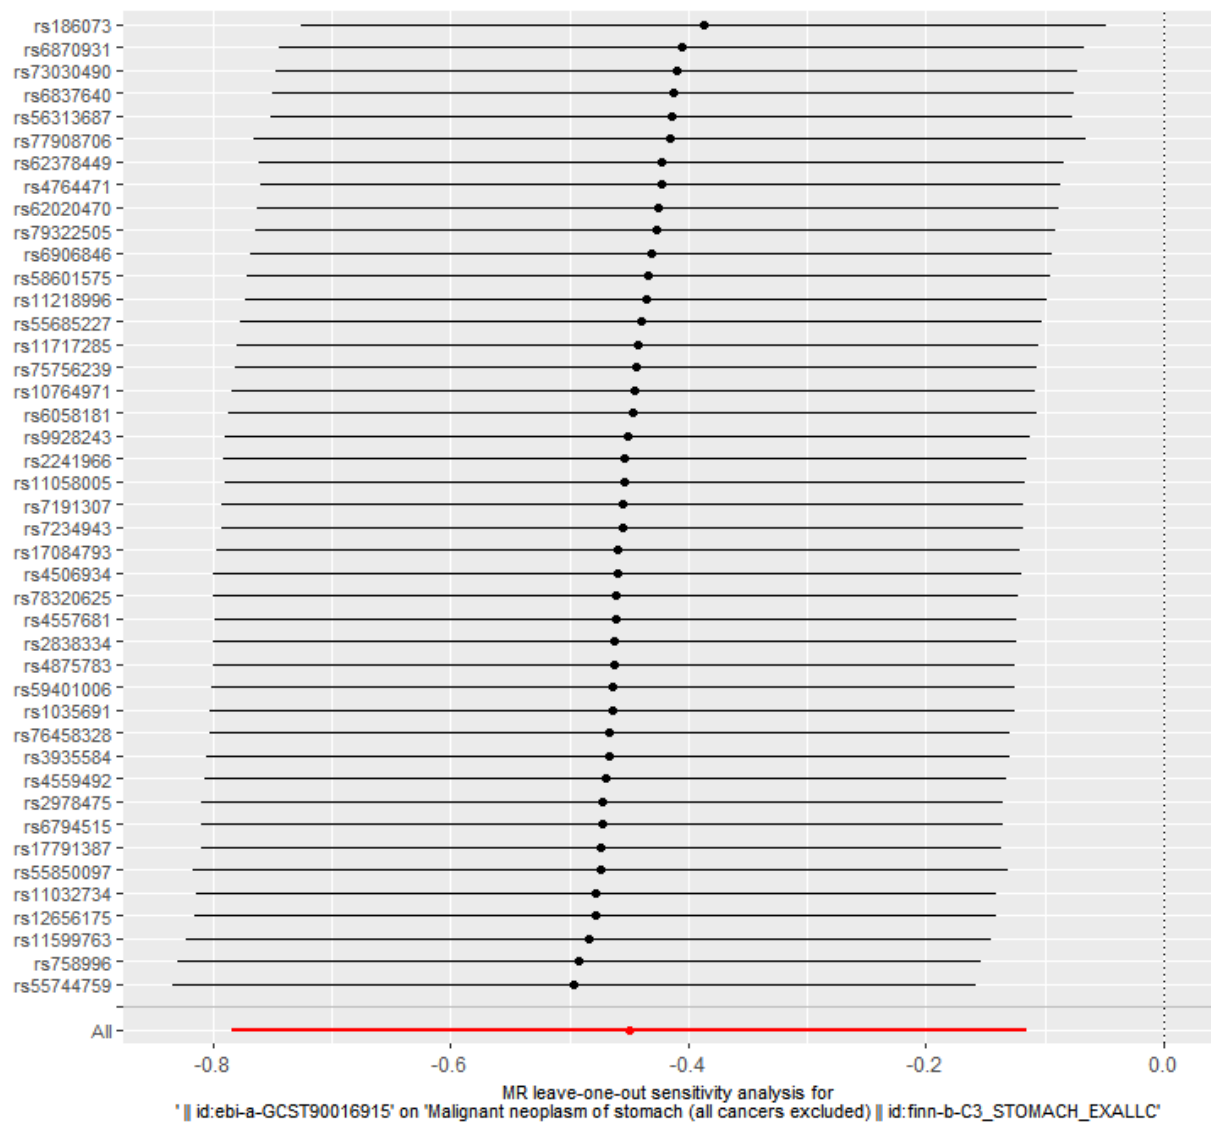

MR Method

- Inverse variance weighted
- MR Egger

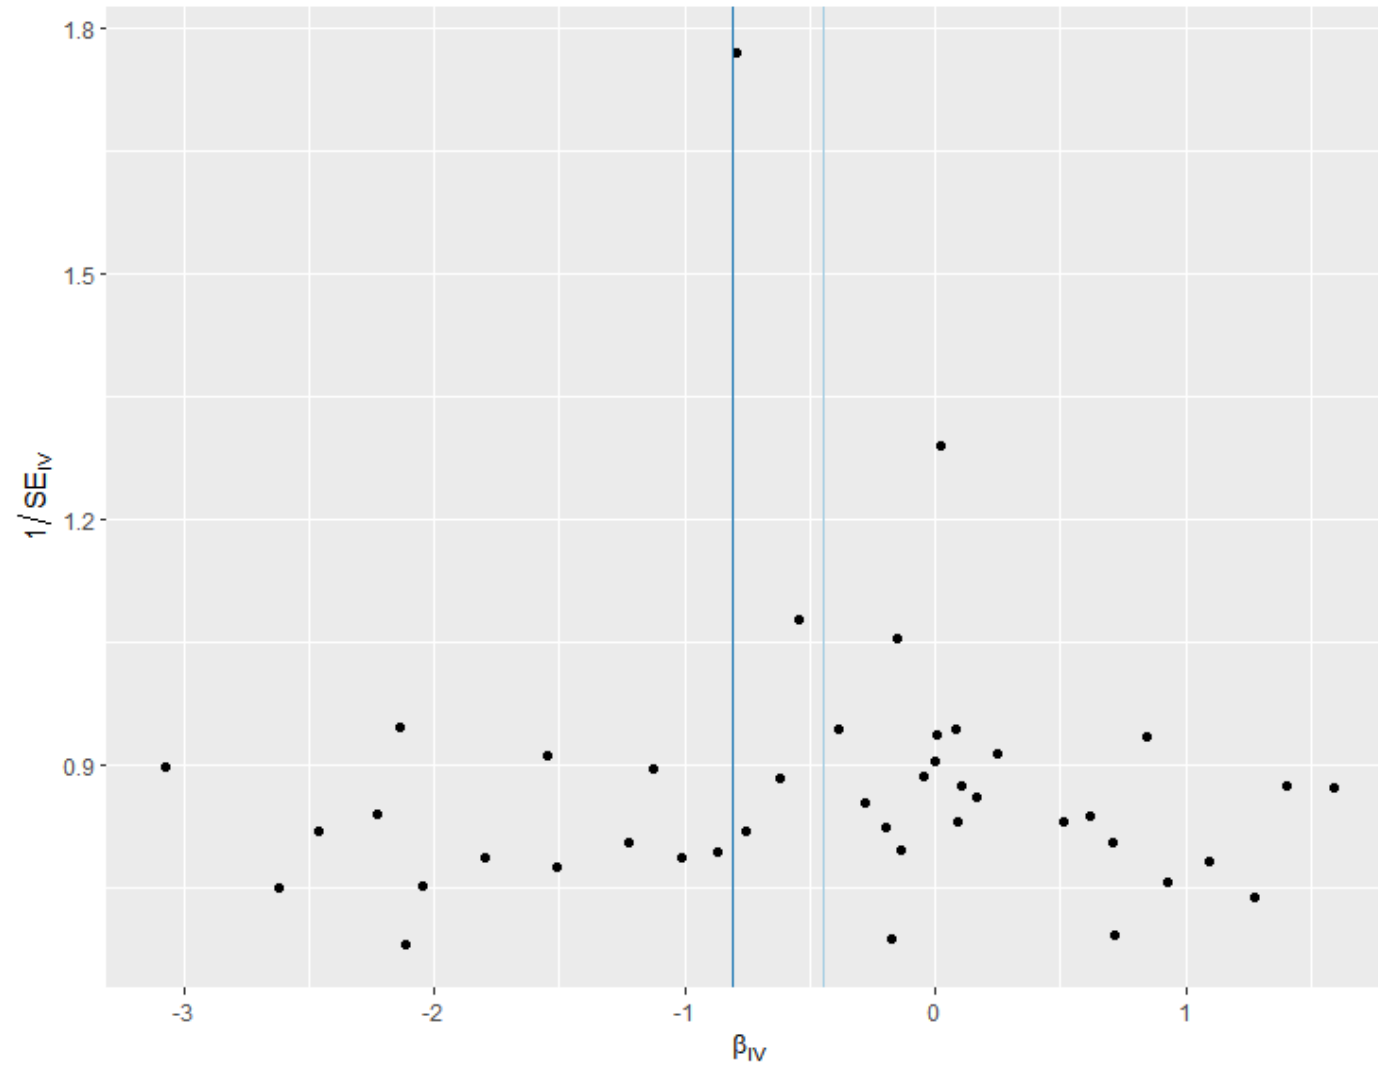

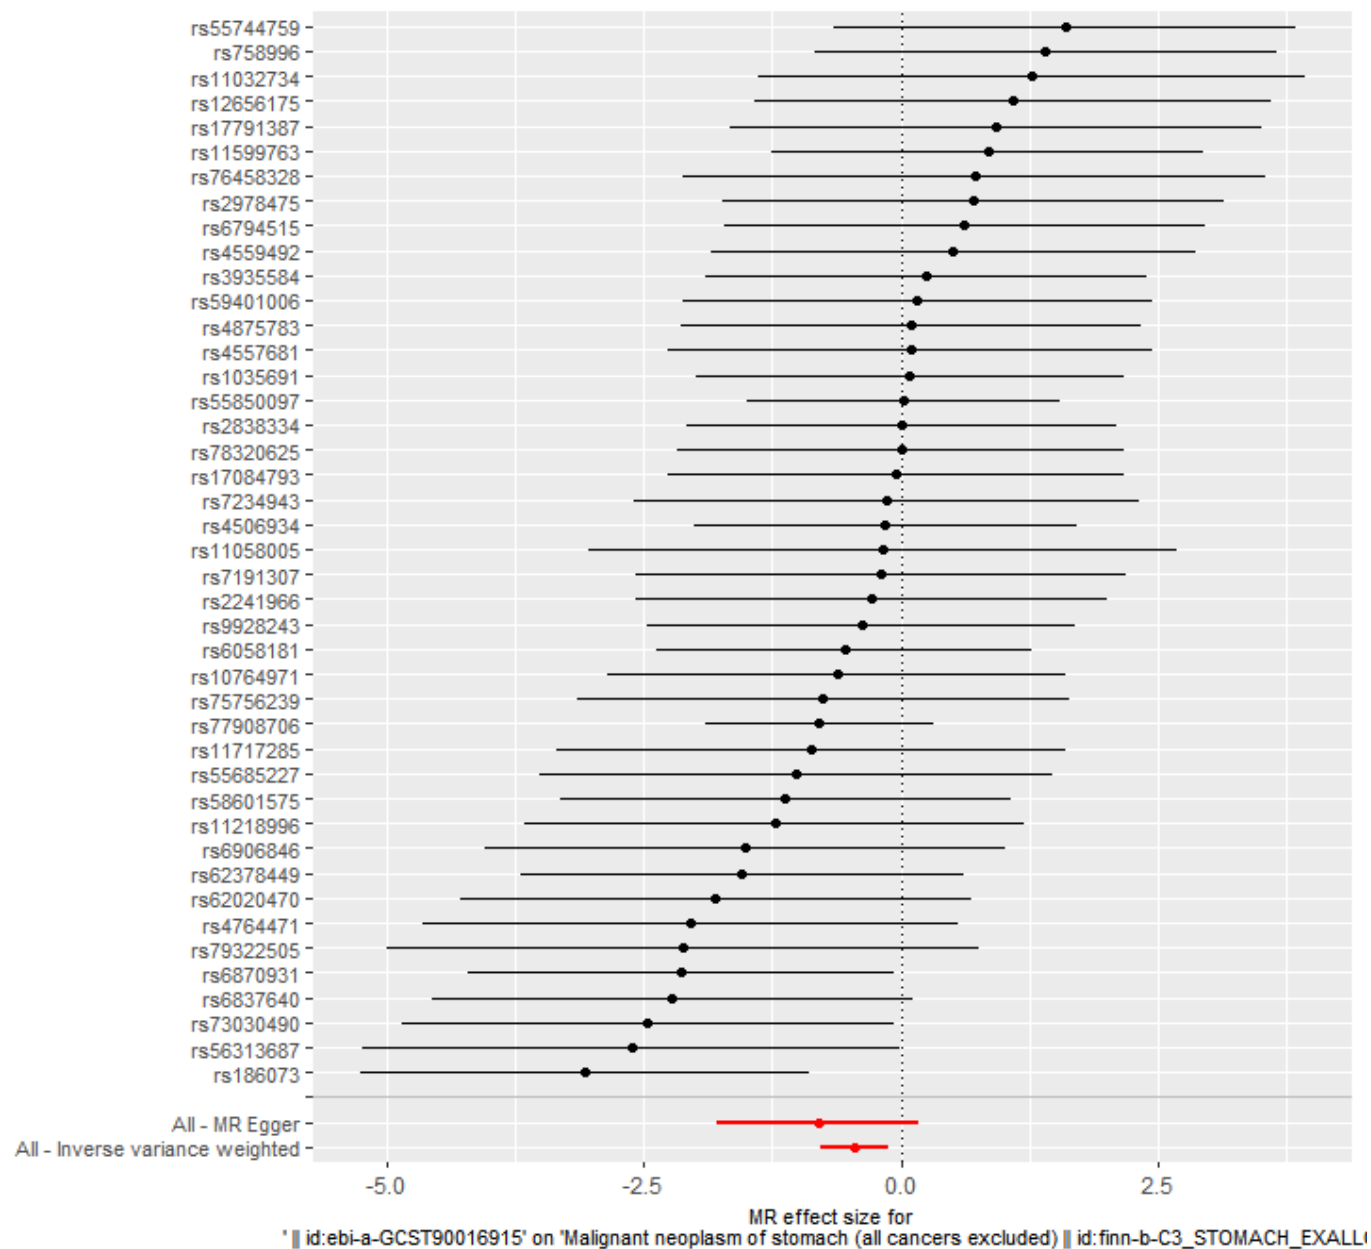

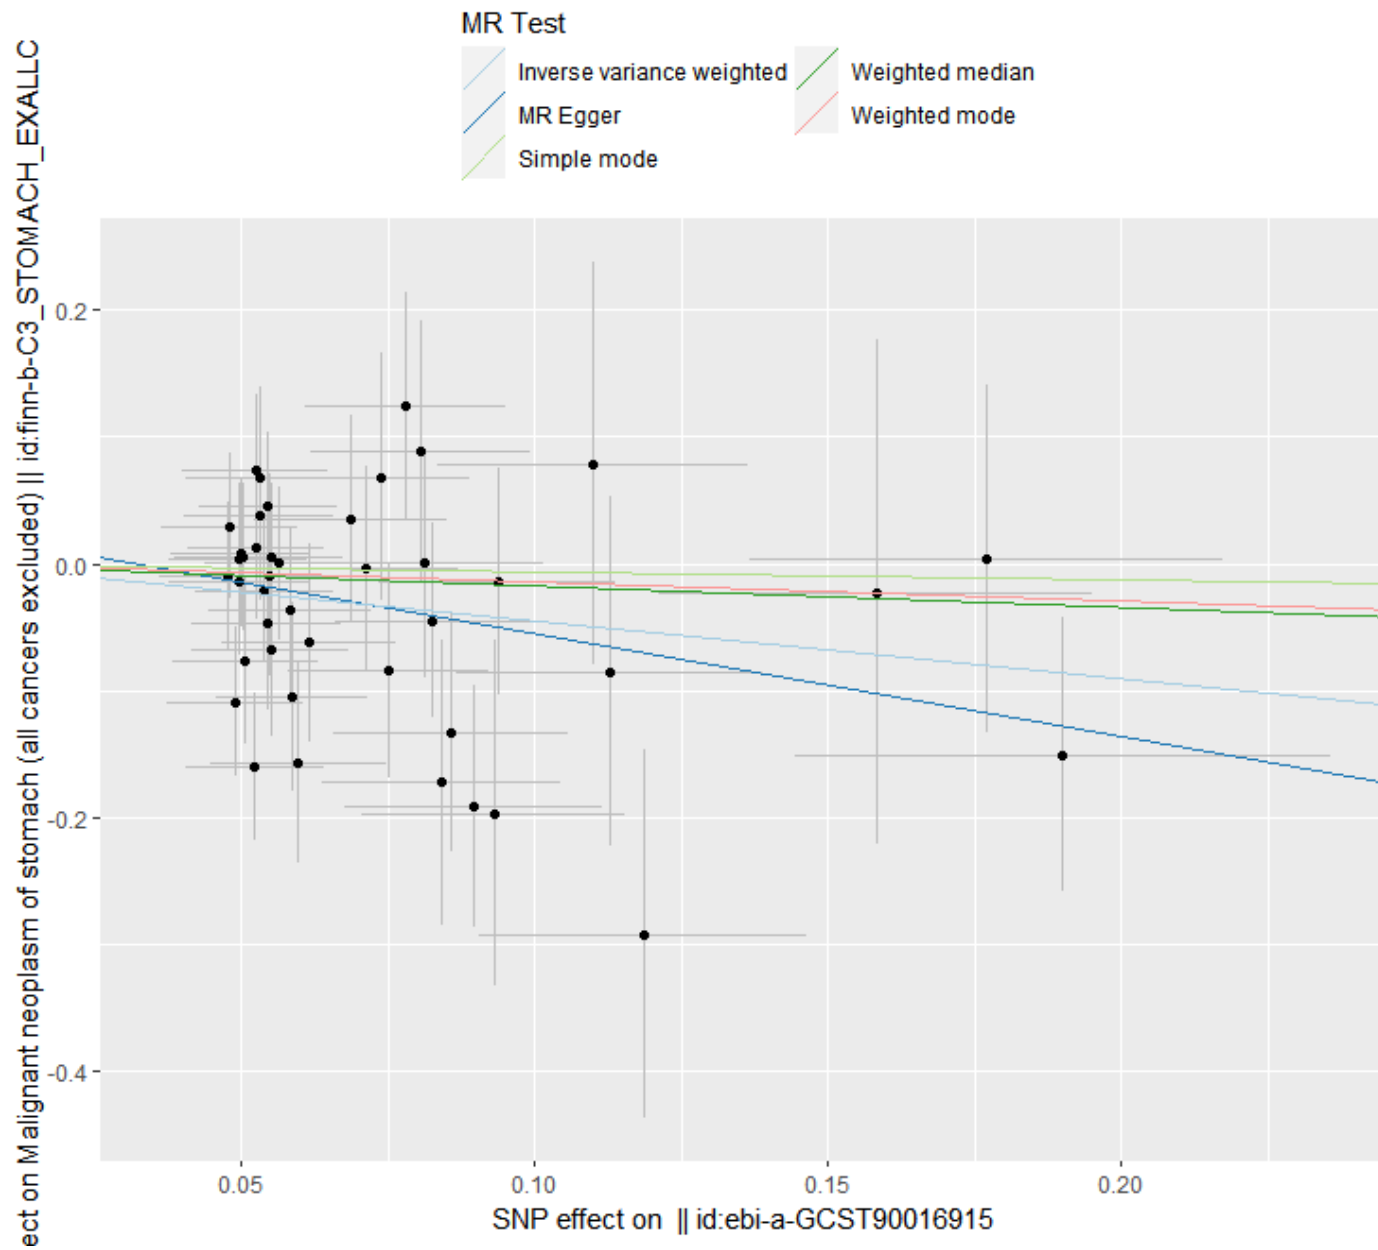

**Figure 84** Leave-one-out analysis, funnel plot, MR effect size and scatter plot for gut microbiota abundance (class Gammaproteobacteria id.3303) on gastric cancer

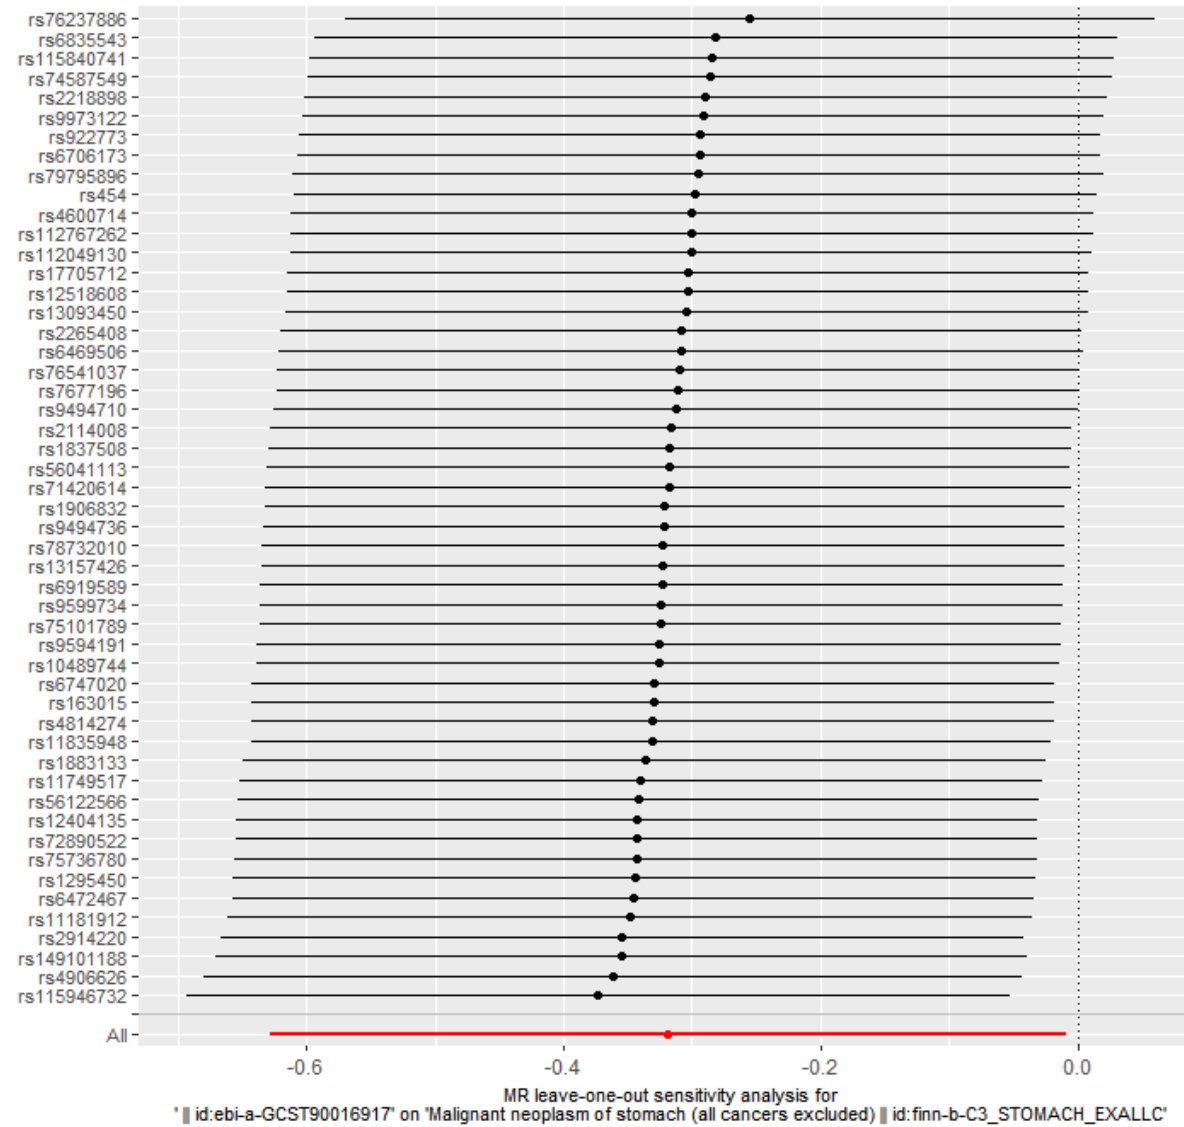

MR Method

- Inverse variance weighted
- MR Egger

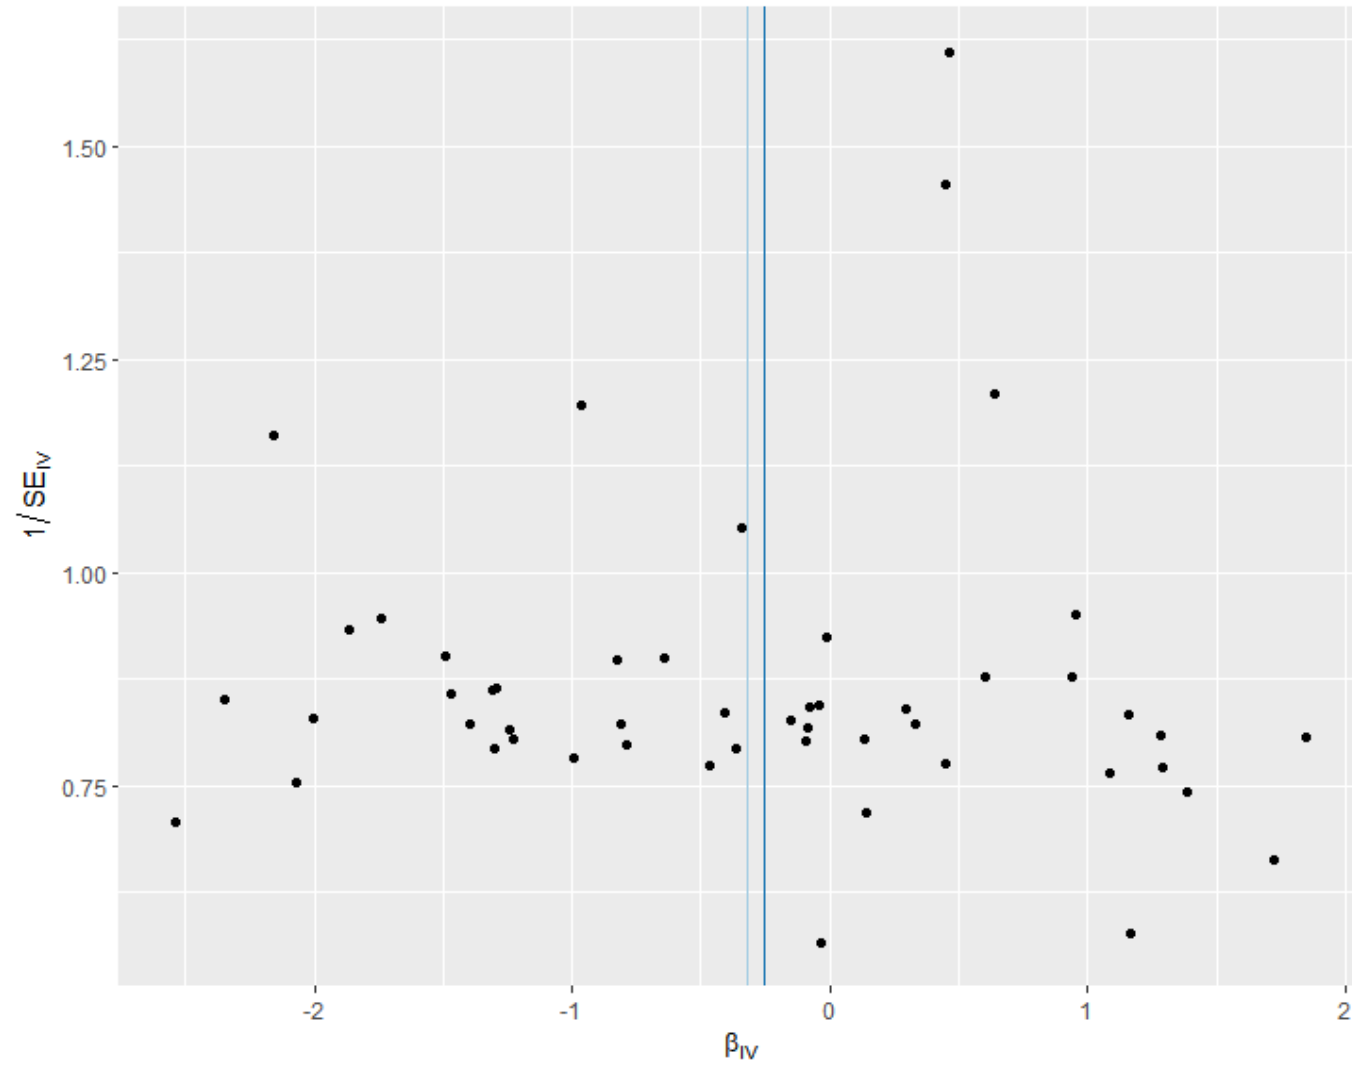

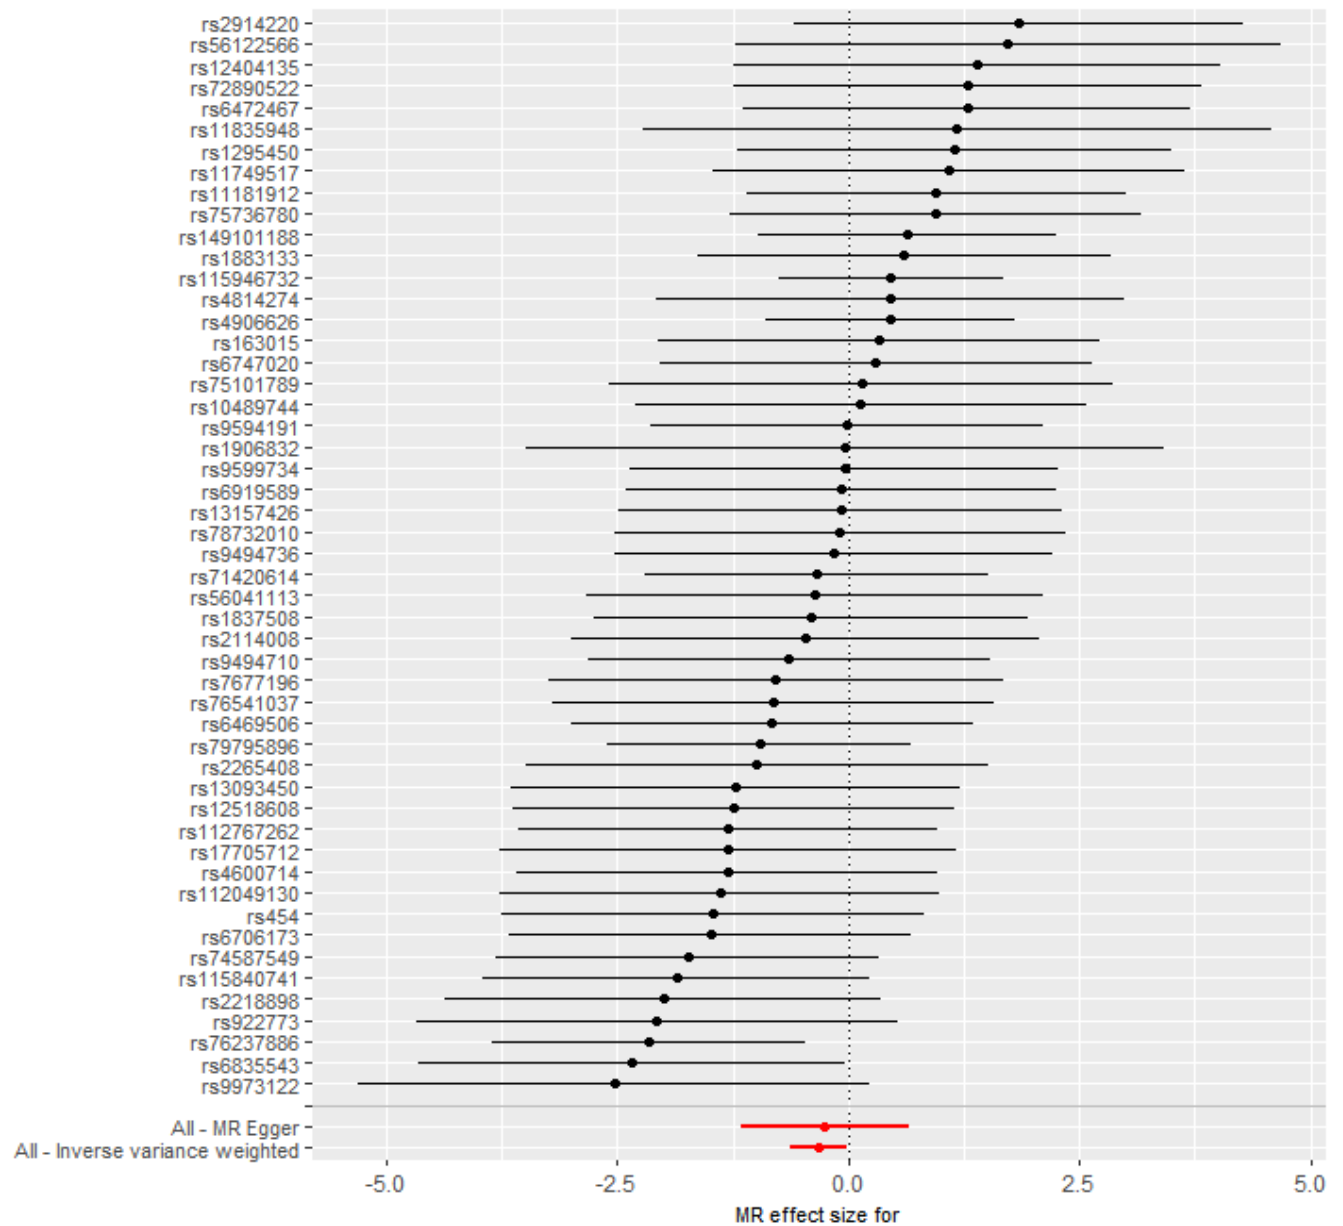

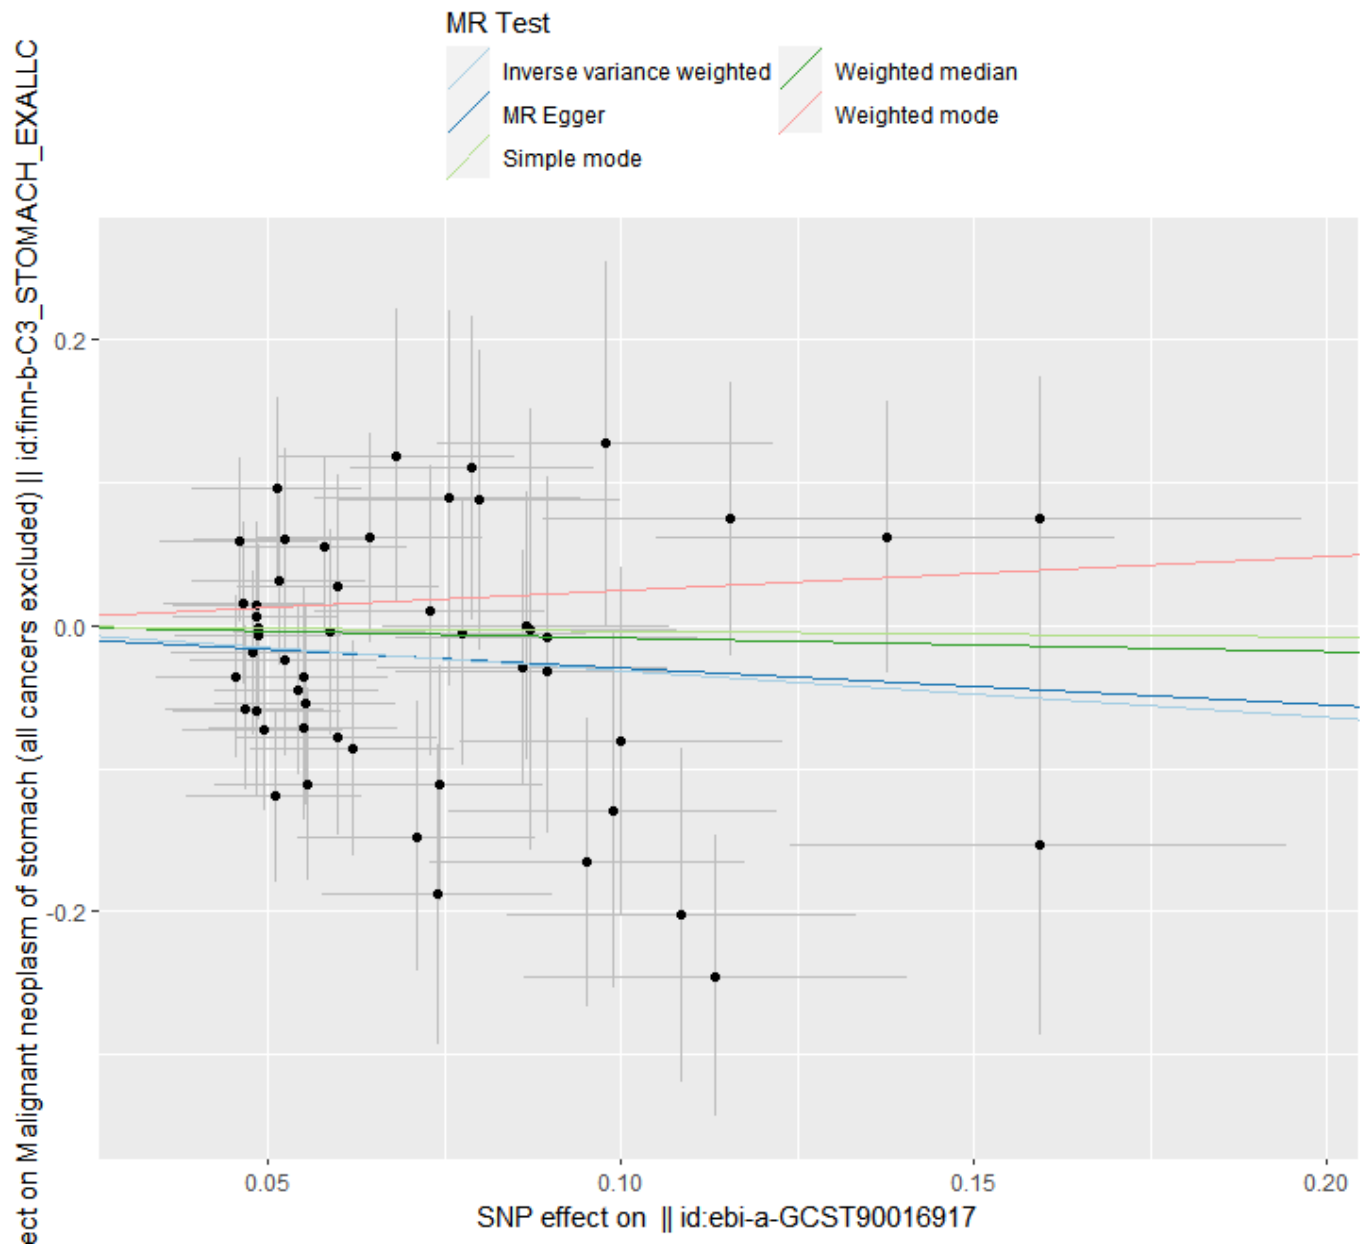



**Figure 85** Leave-one-out analysis, funnel plot, MR effect size and scatter plot for gut microbiota abundance (family Actinomycetaceae id.421) on gastric cancer

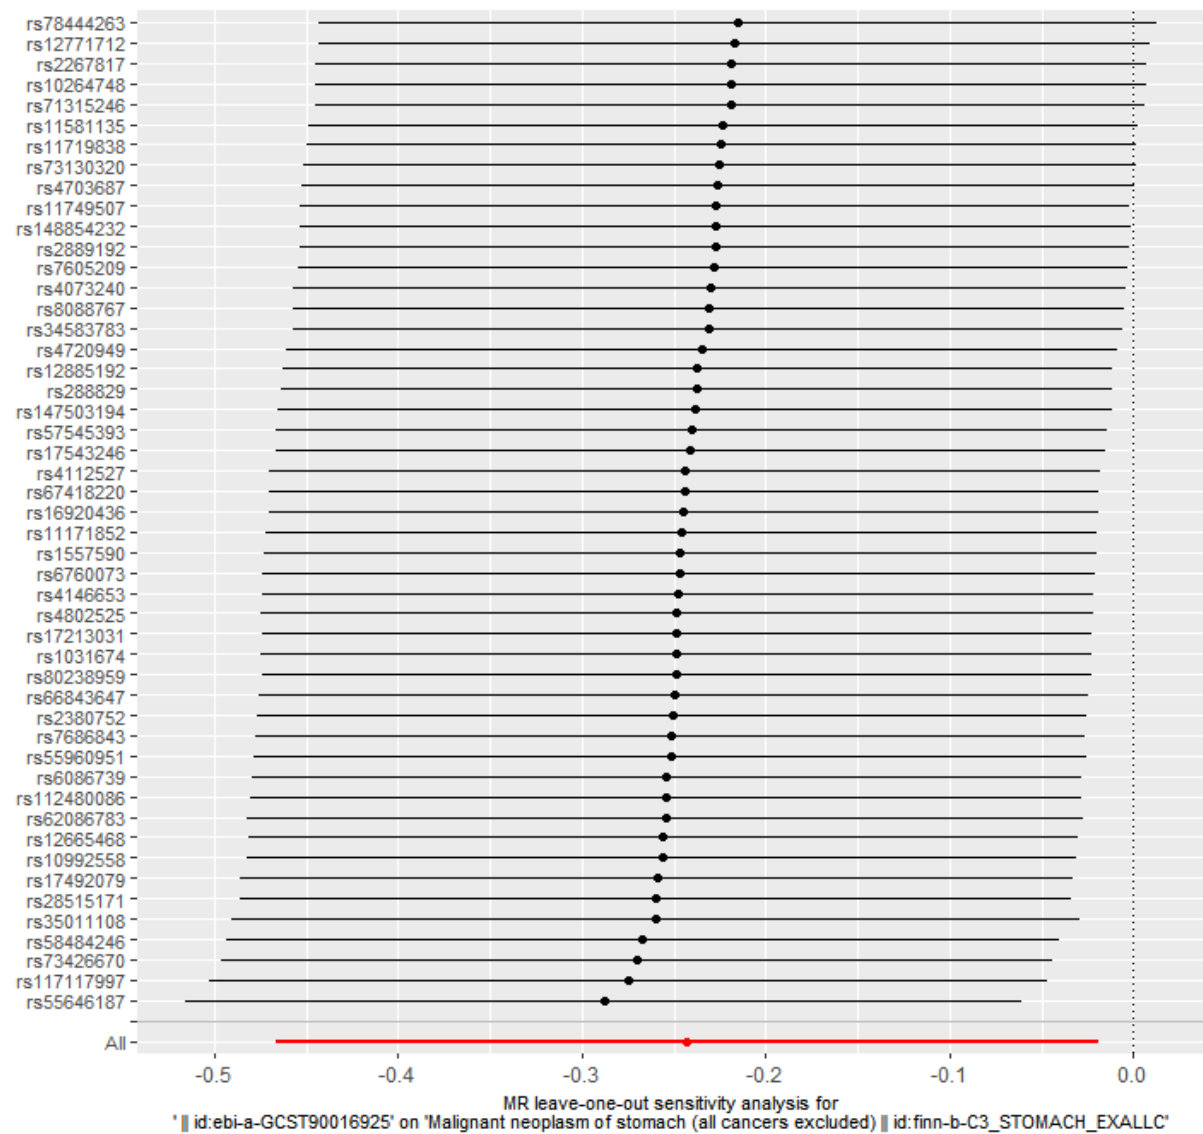

MR Method

- Inverse variance weighted
- MR Egger

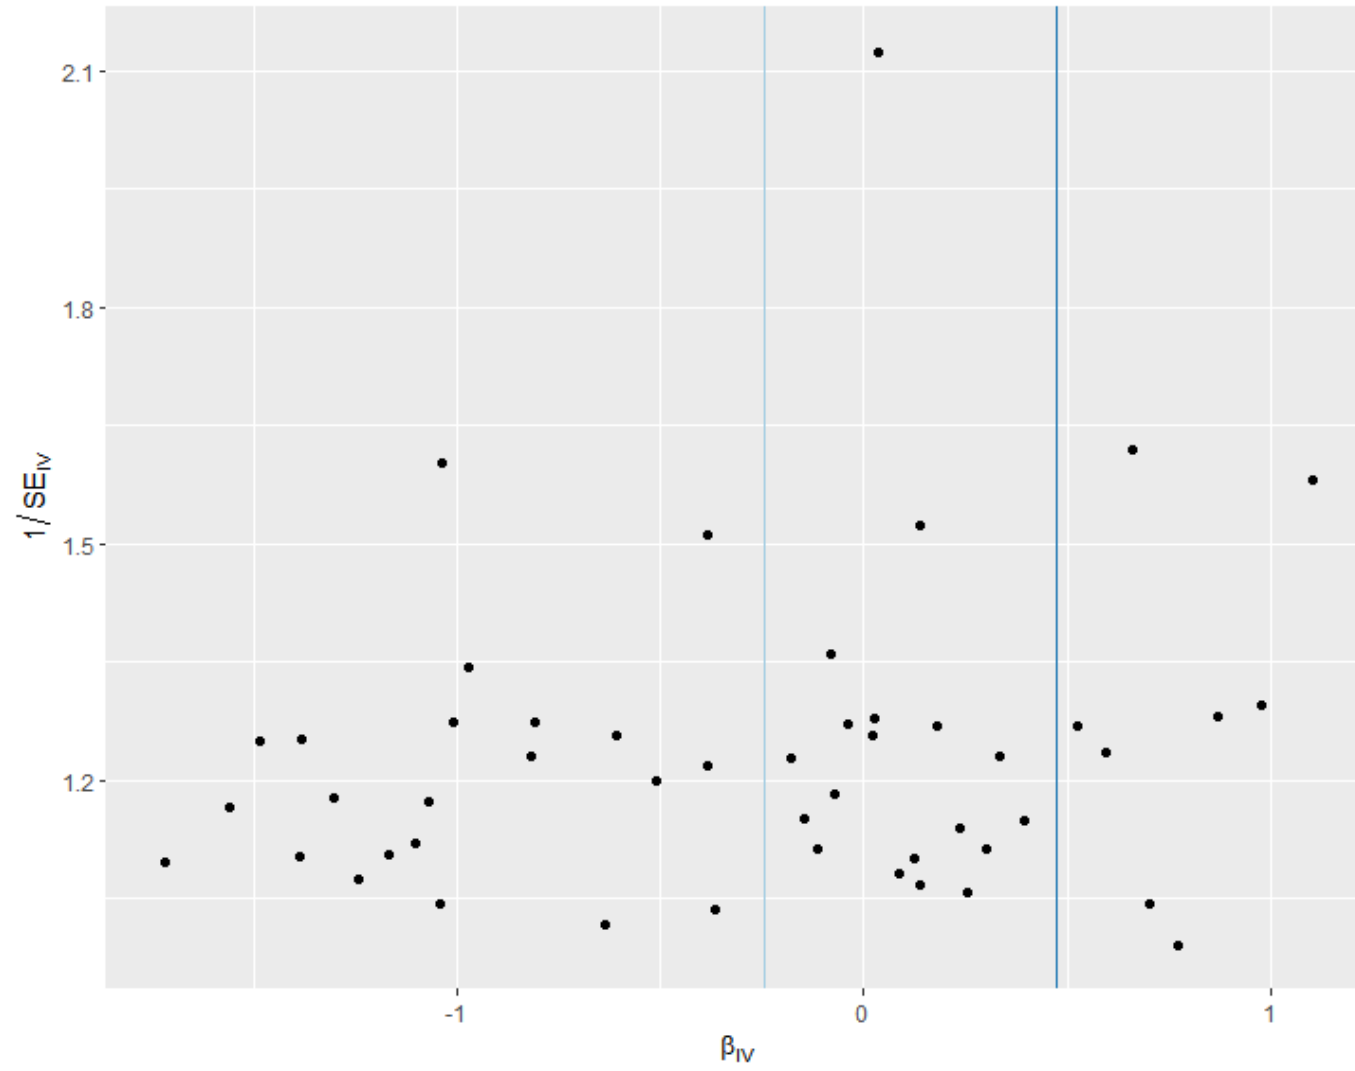

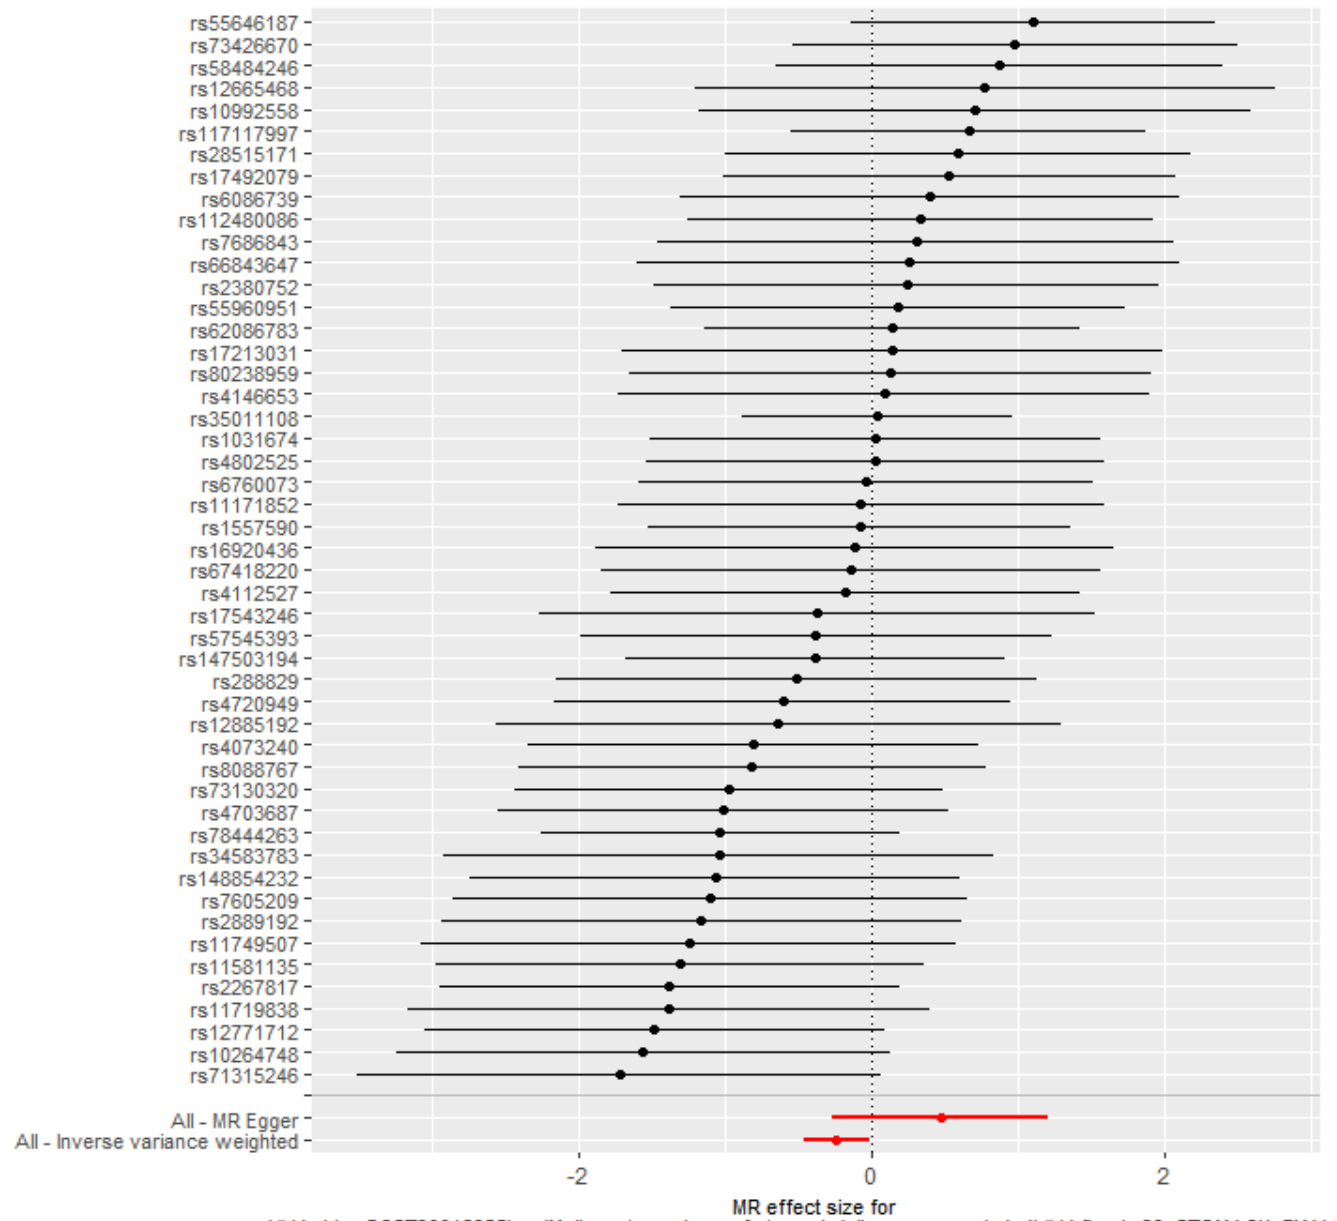

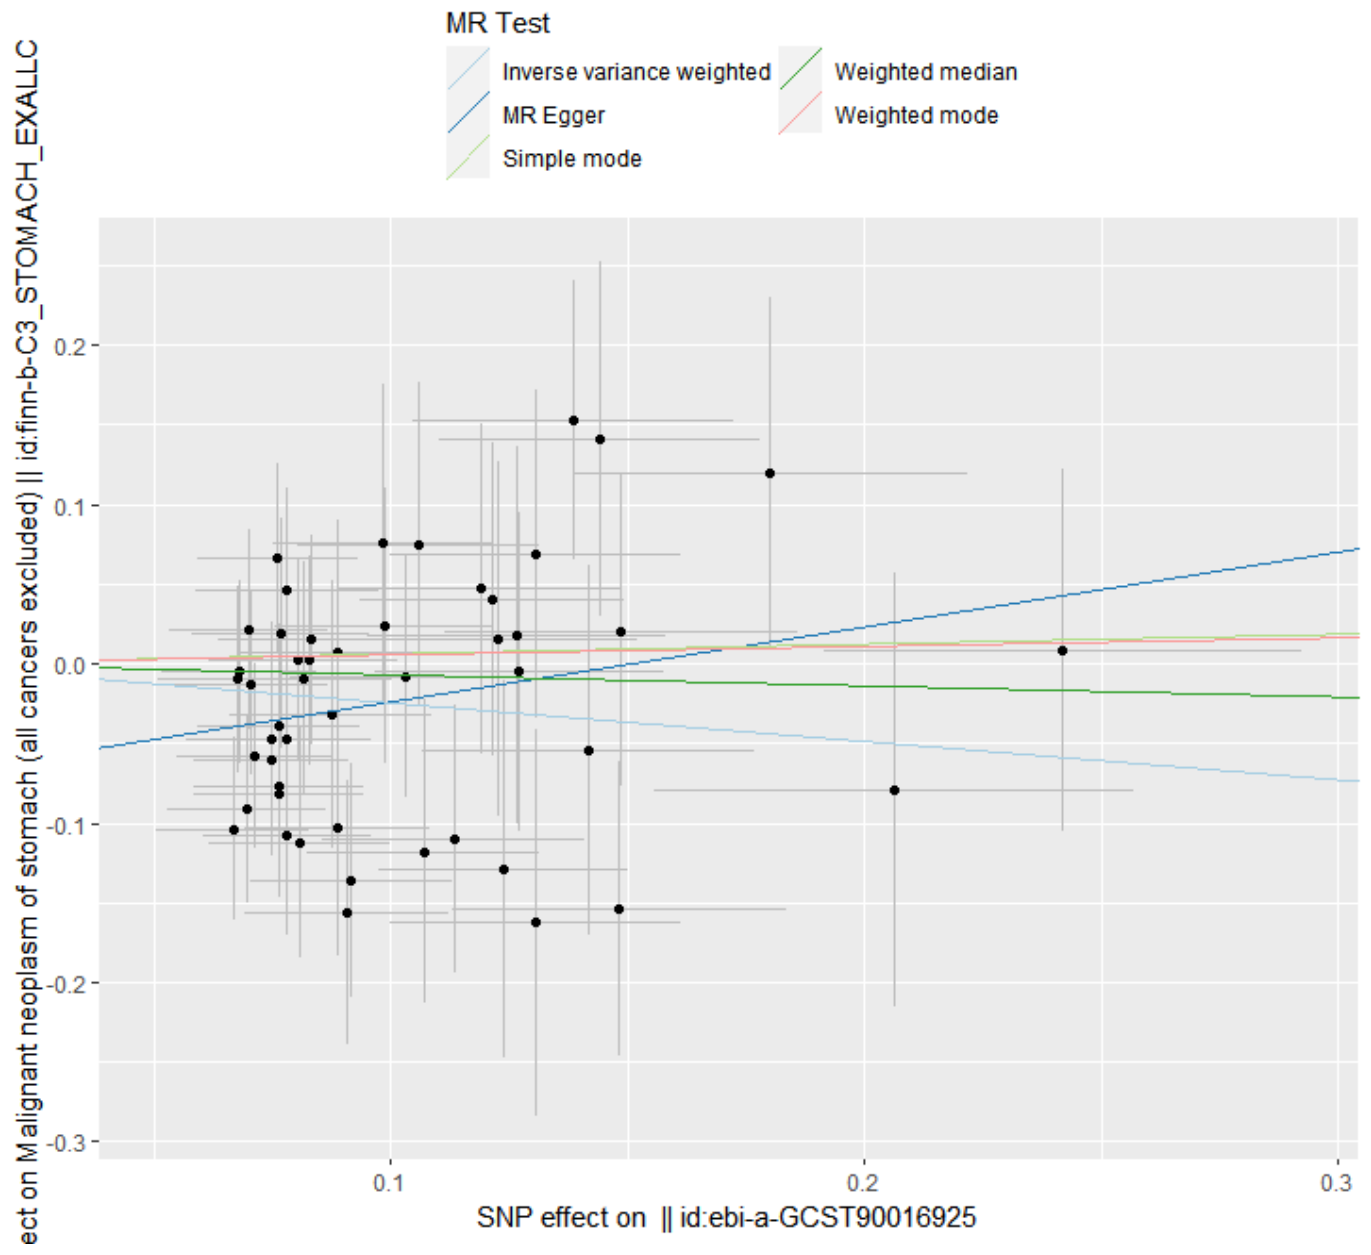

**Figure 86** Leave-one-out analysis, funnel plot, MR effect size and scatter plot for gut microbiota abundance (family Desulfovibrionaceae id.3169) on gastric cancer

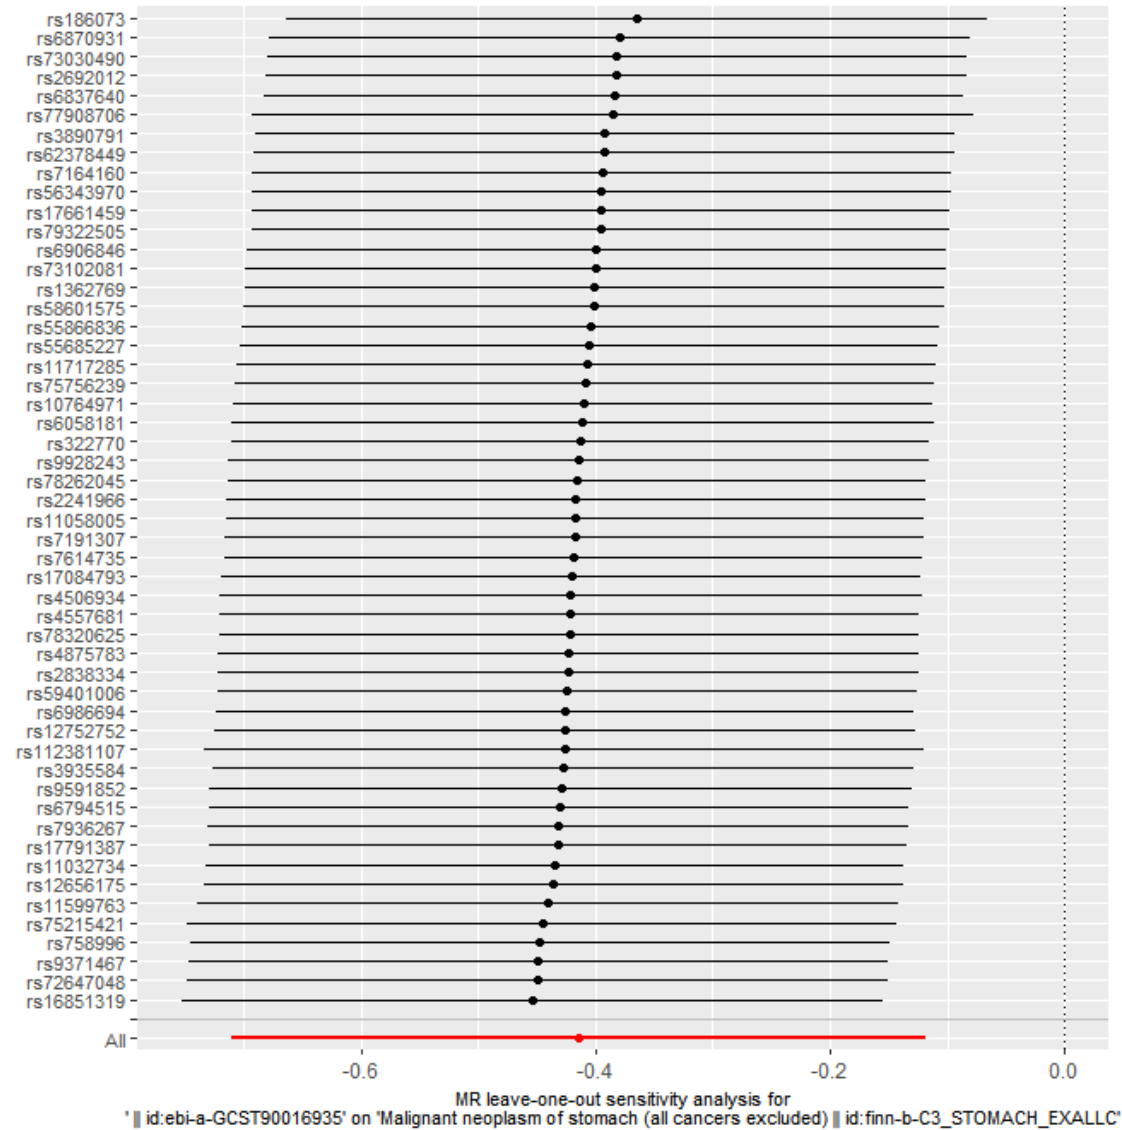

MR Method

- Inverse variance weighted
- MR Egger

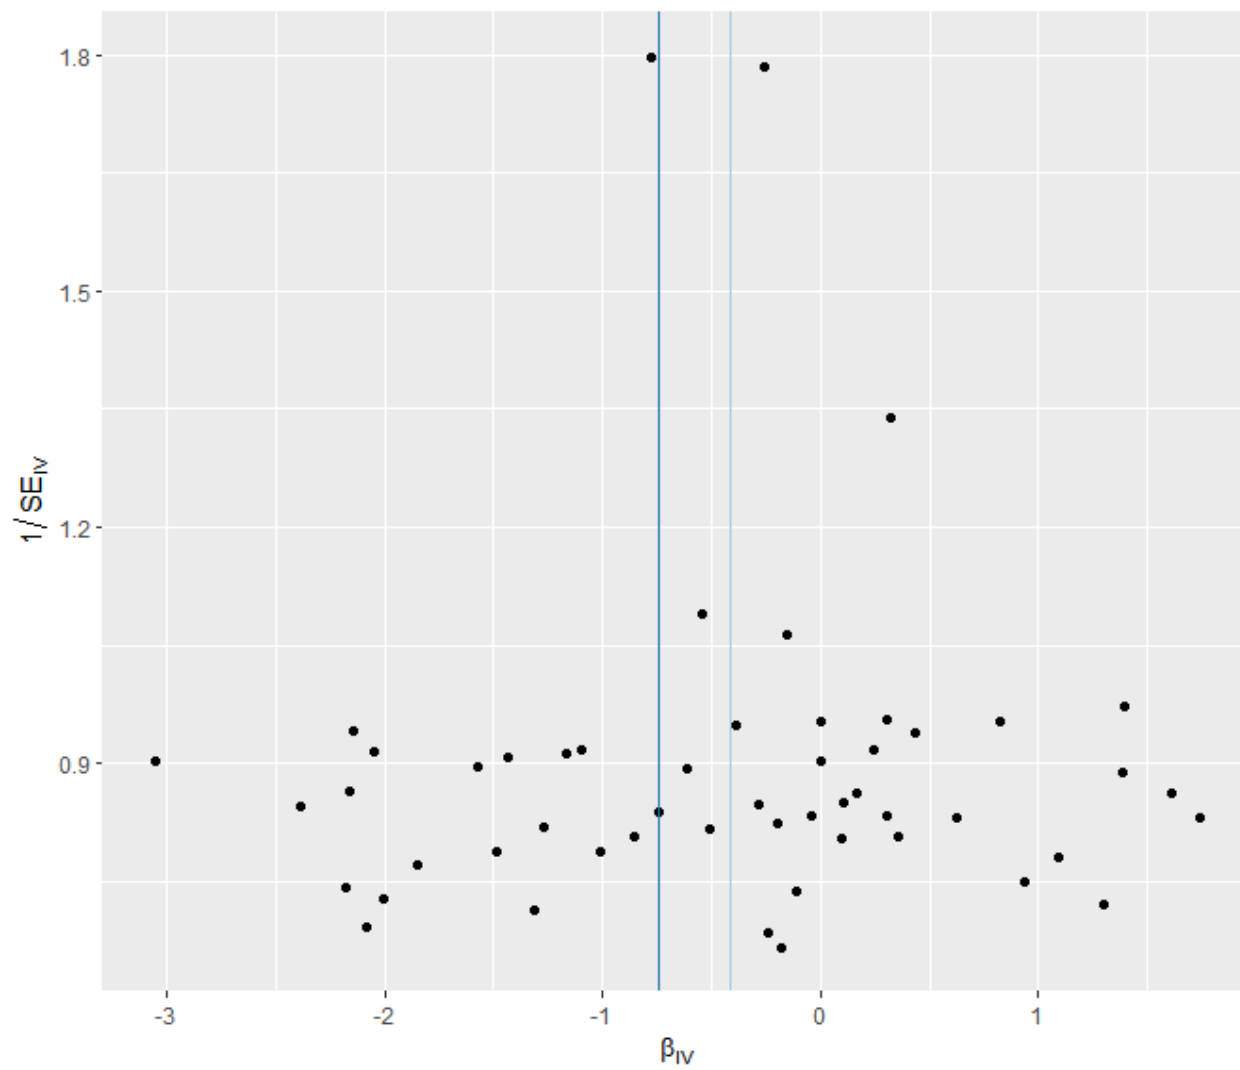

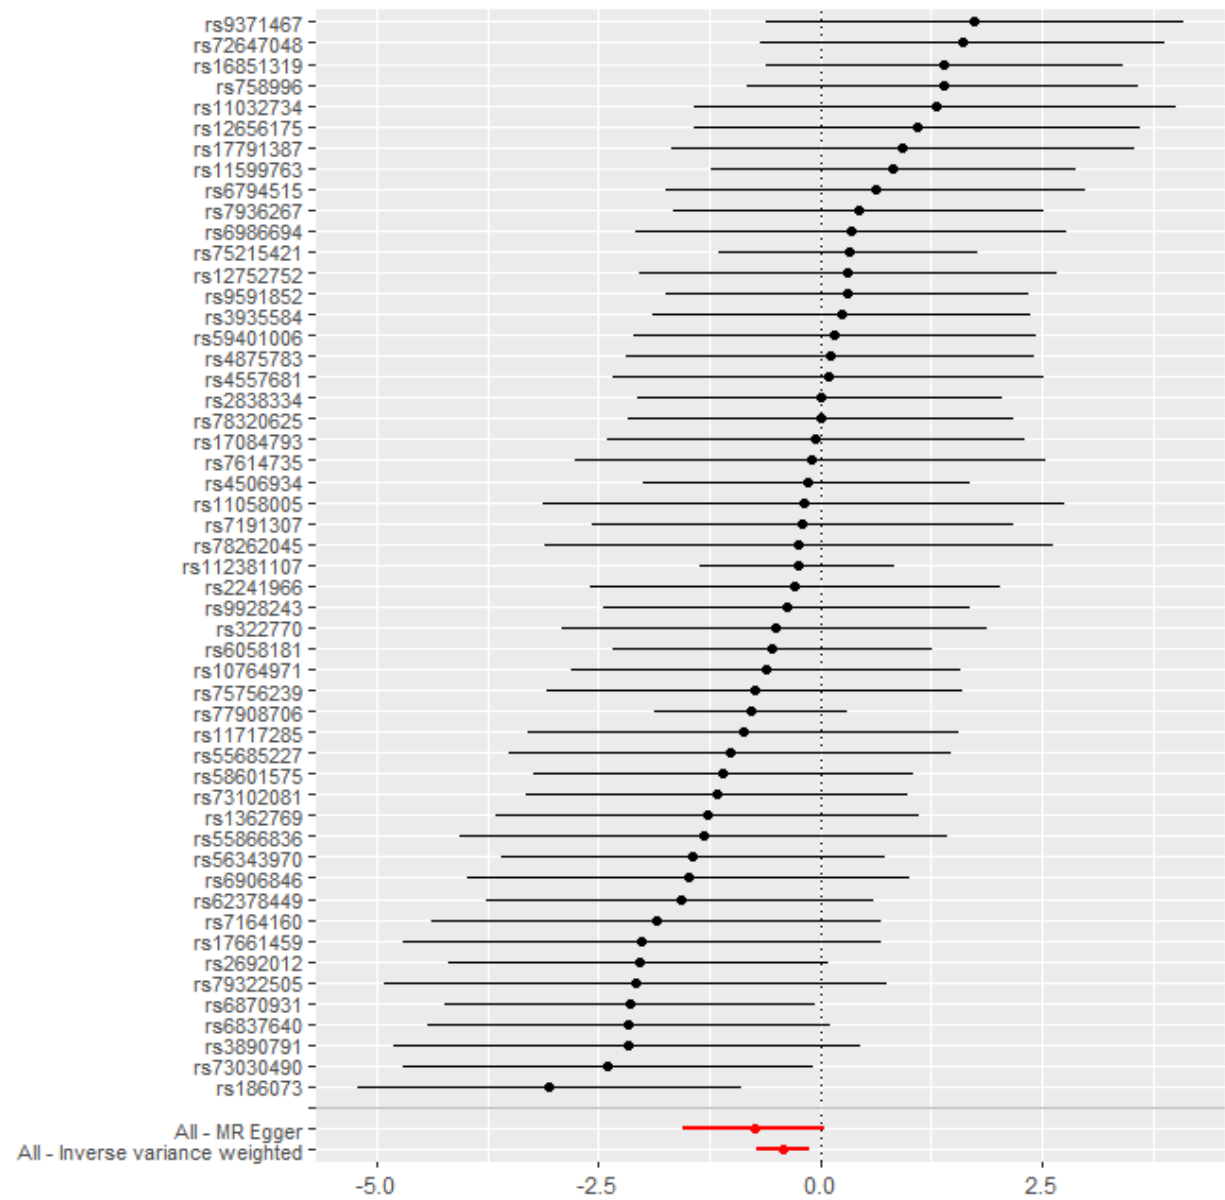

MR effect size for  
' || id:ebi-a-GCST90016935' on 'Malignant neoplasm of stomach (all cancers excluded)' || id:finn-b-C3\_STOMACH\_

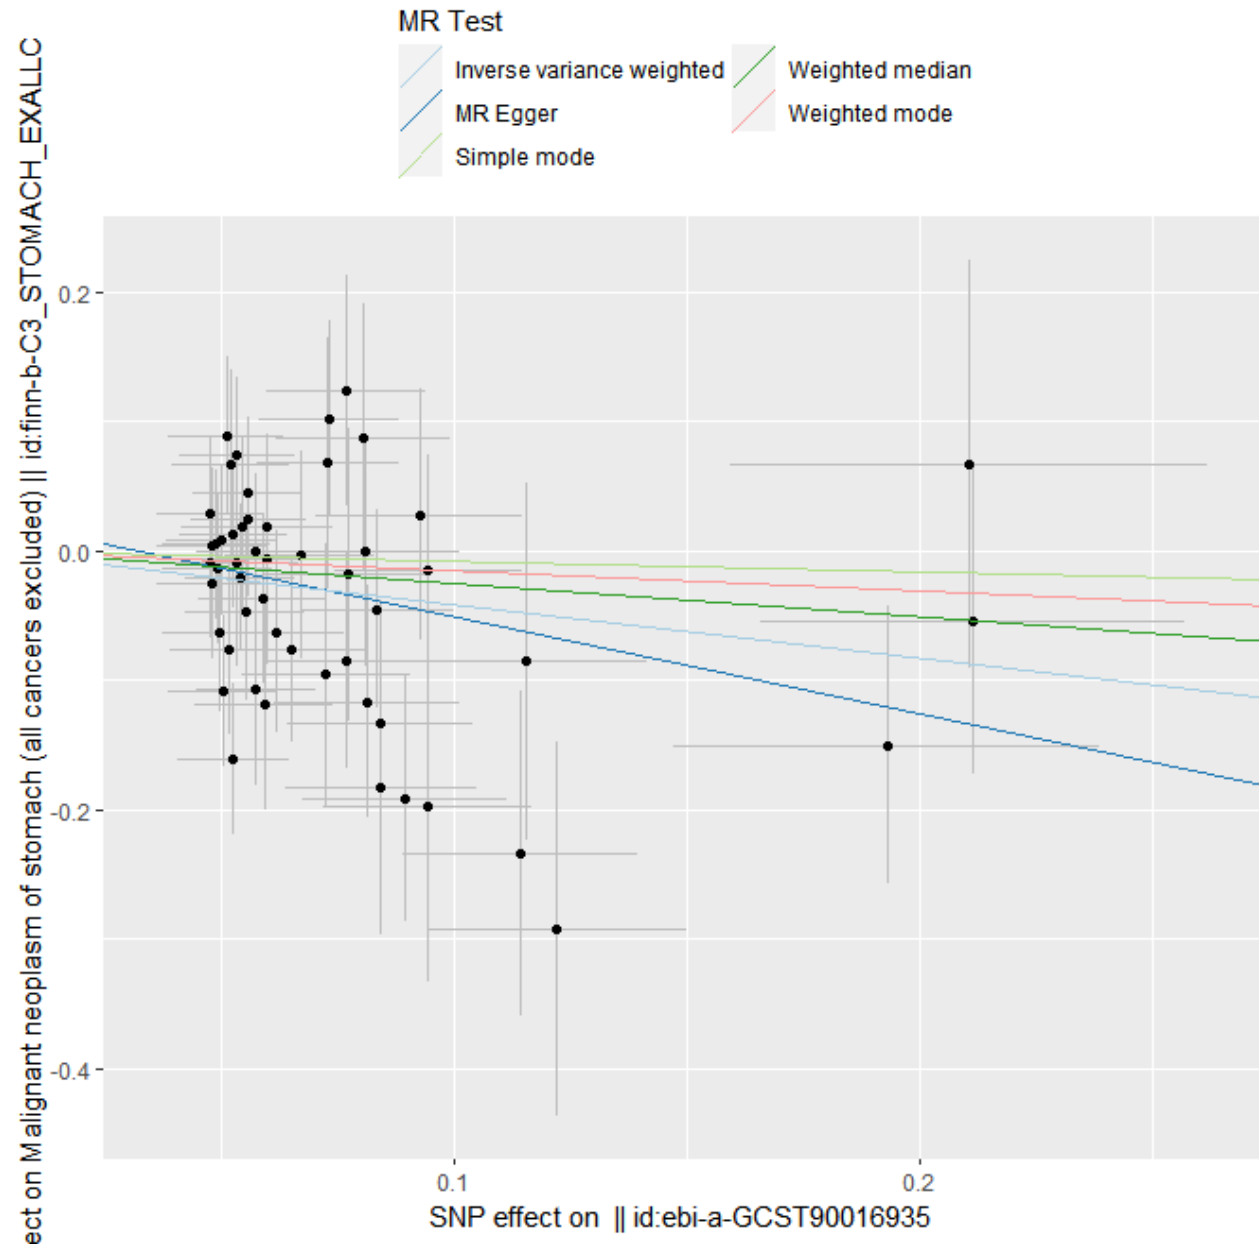



**Figure 87** Leave-one-out analysis, funnel plot, MR effect size and scatter plot for gut microbiota abundance (unknown family id.1000005471) on gastric cancer

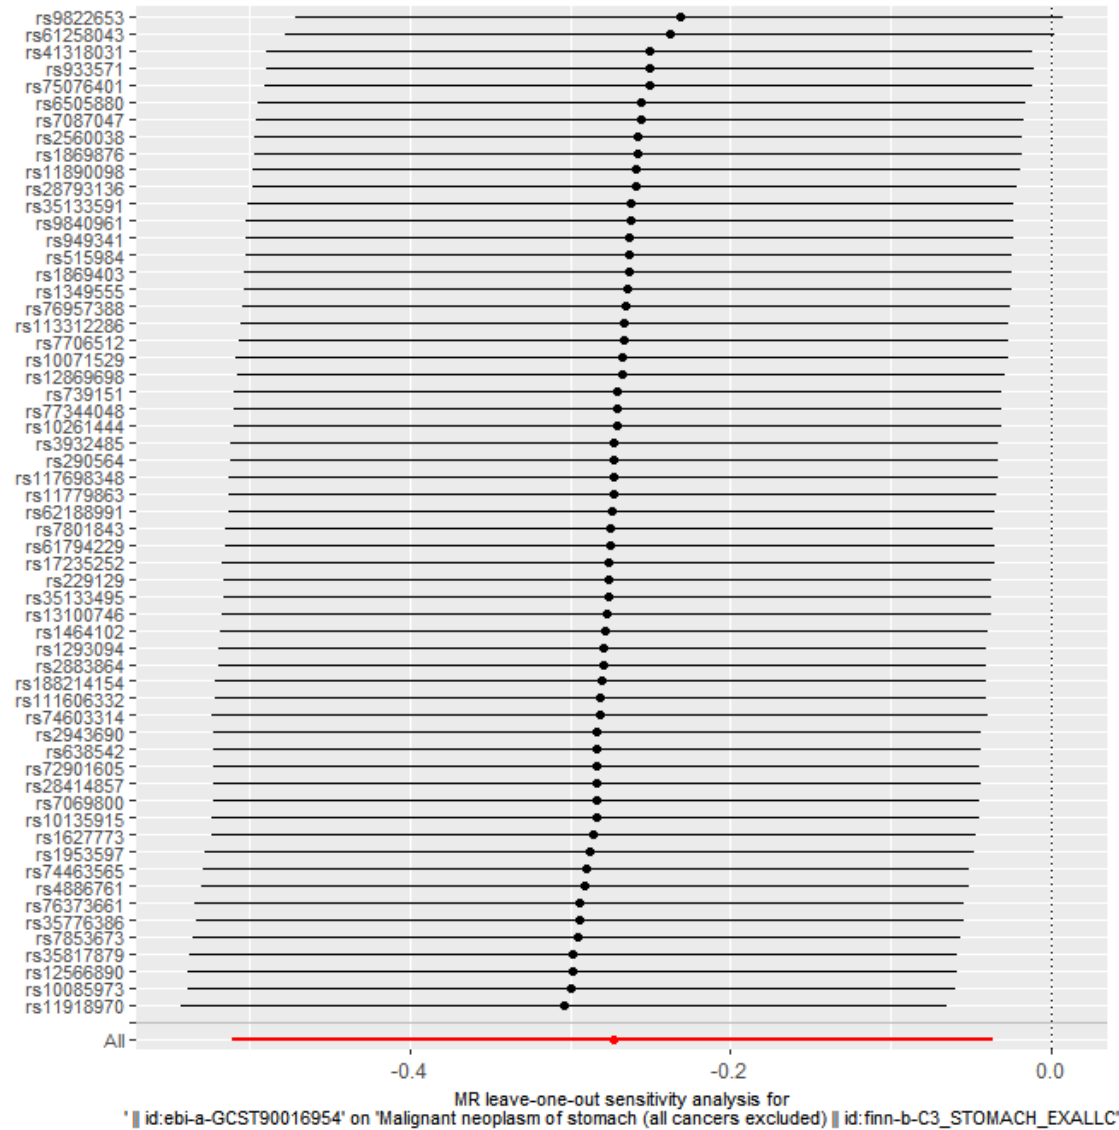

MR Method

- Inverse variance weighted
- MR Egger

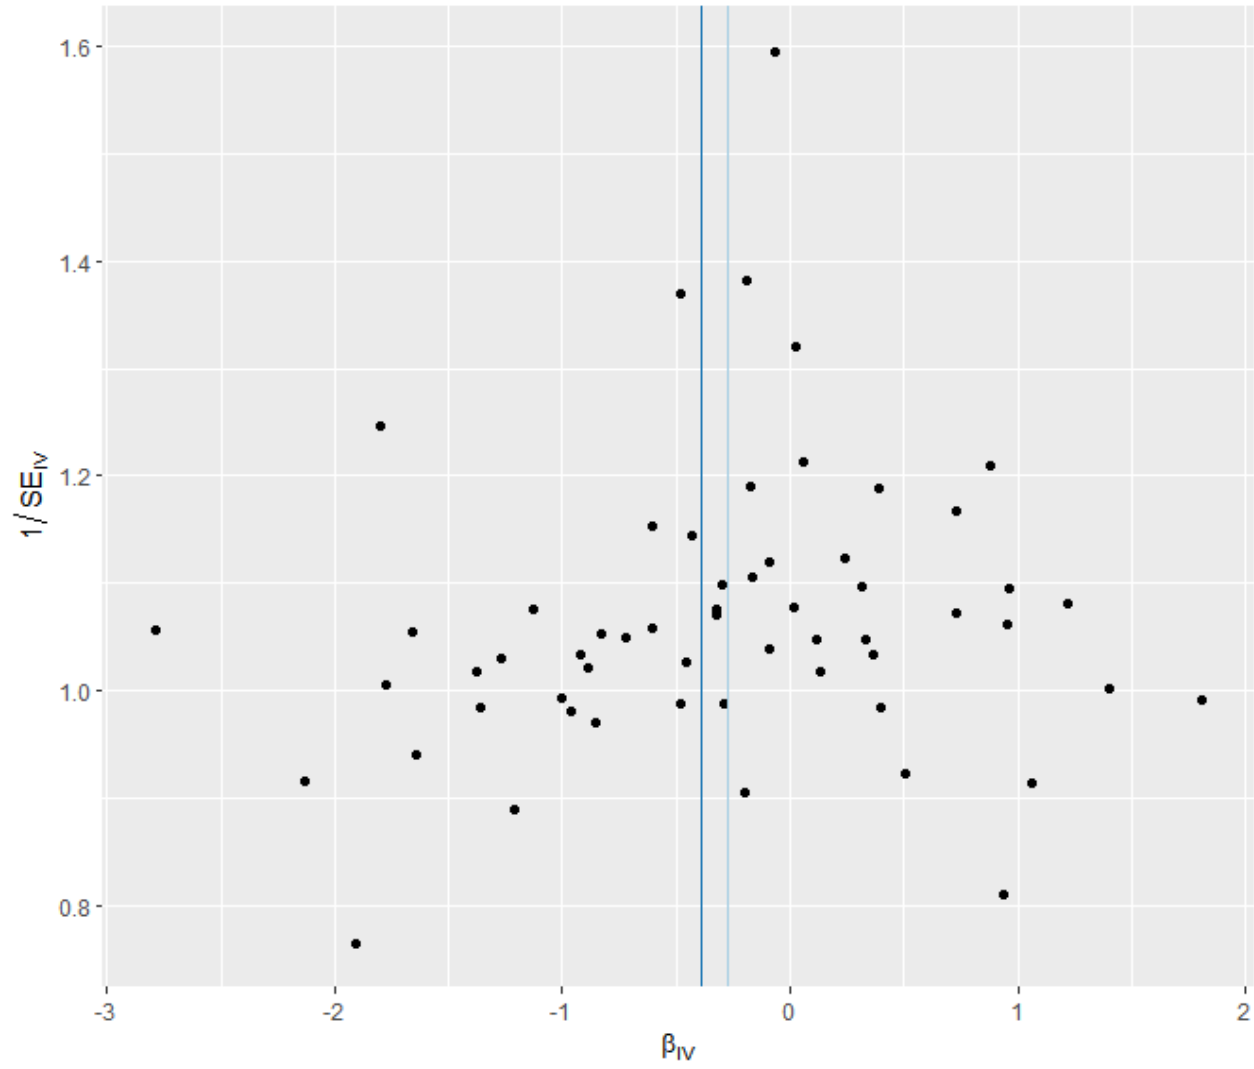

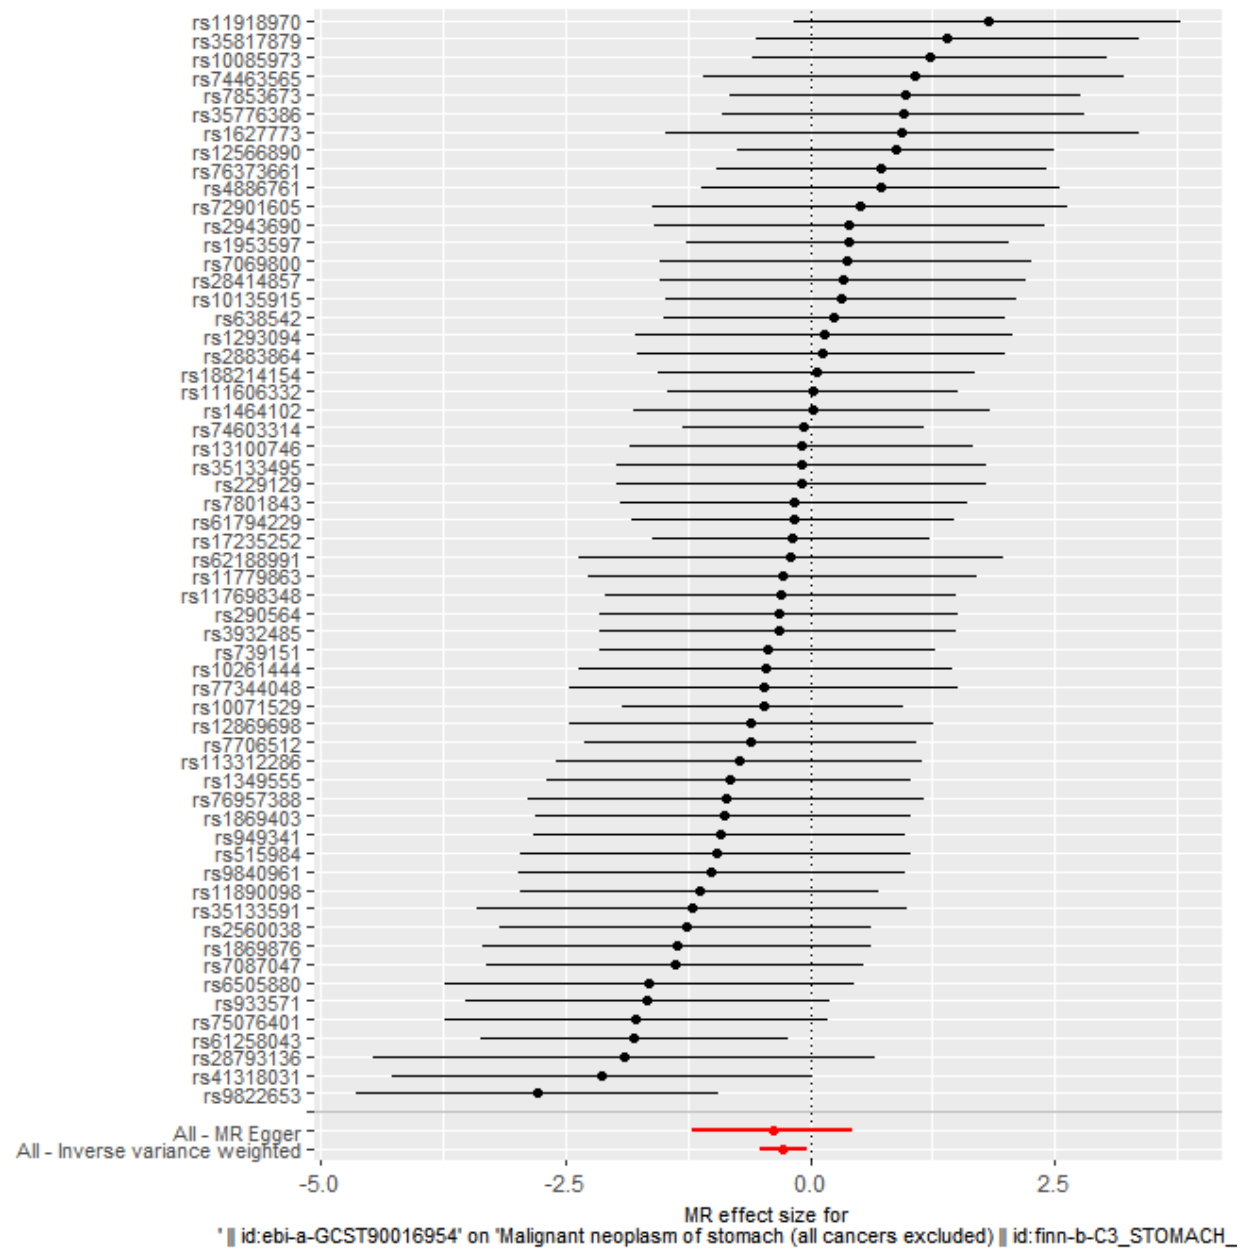

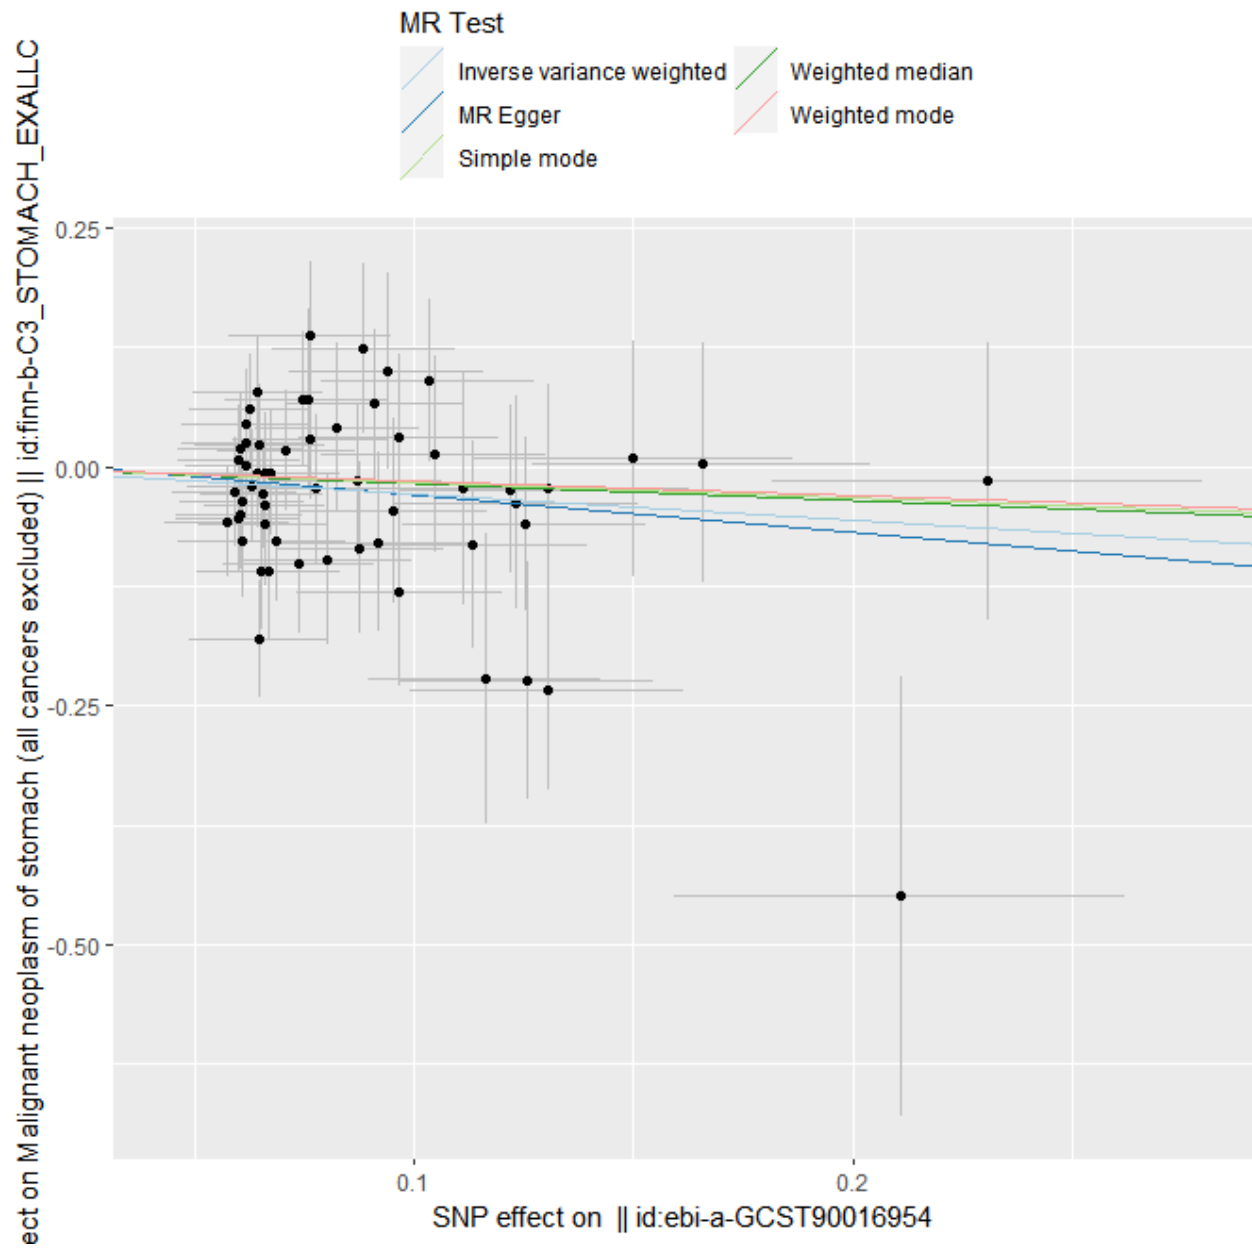

**Figure 88** Leave-one-out analysis, funnel plot, MR effect size and scatter plot for gut microbiota abundance (genus Actinomyces id.423) on gastric cancer

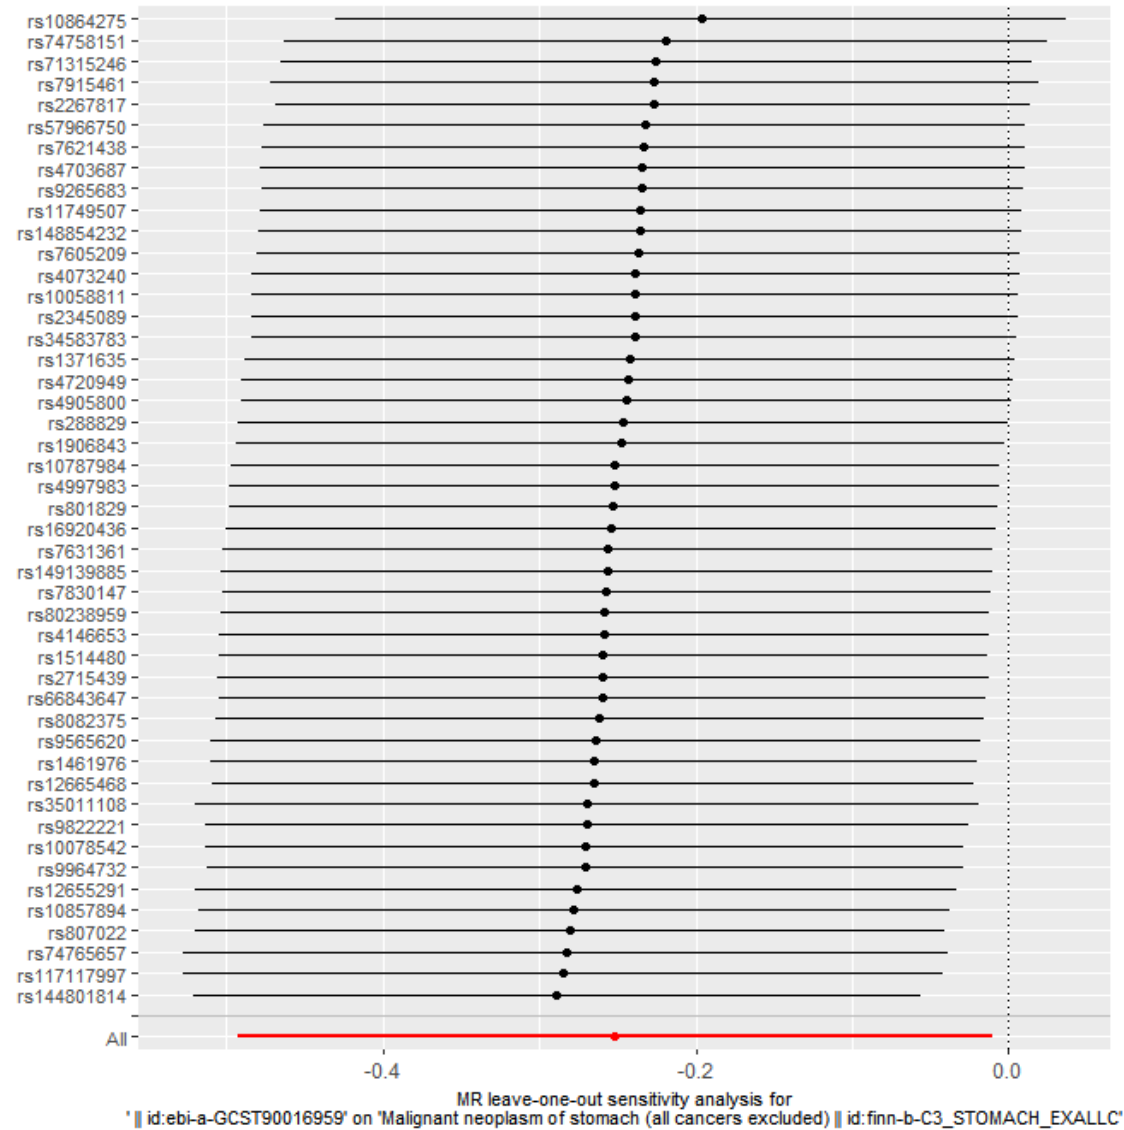

MR Method

- Inverse variance weighted
- MR Egger

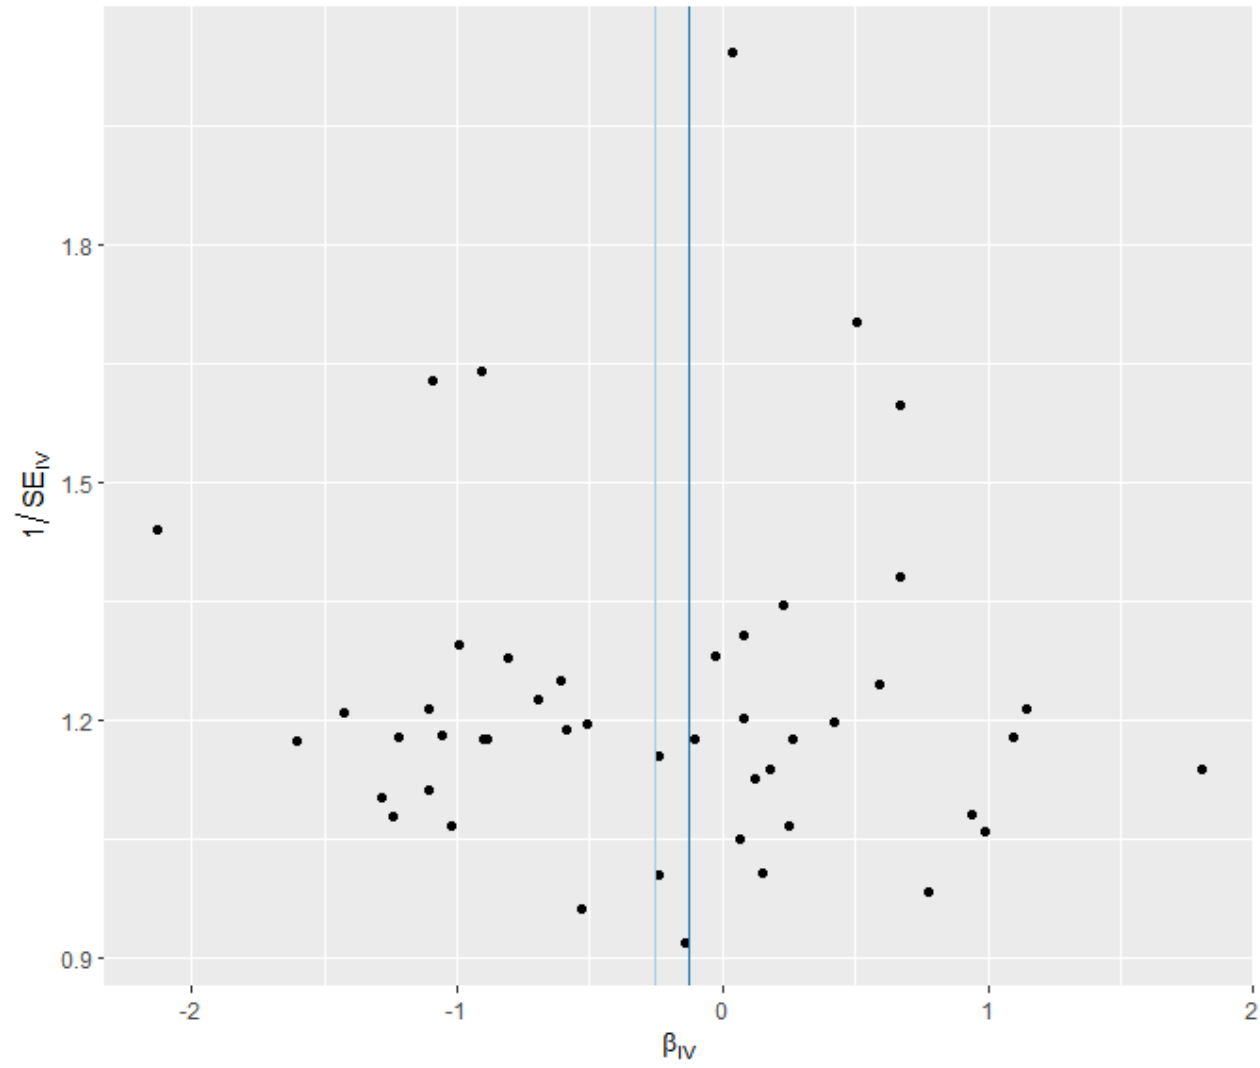

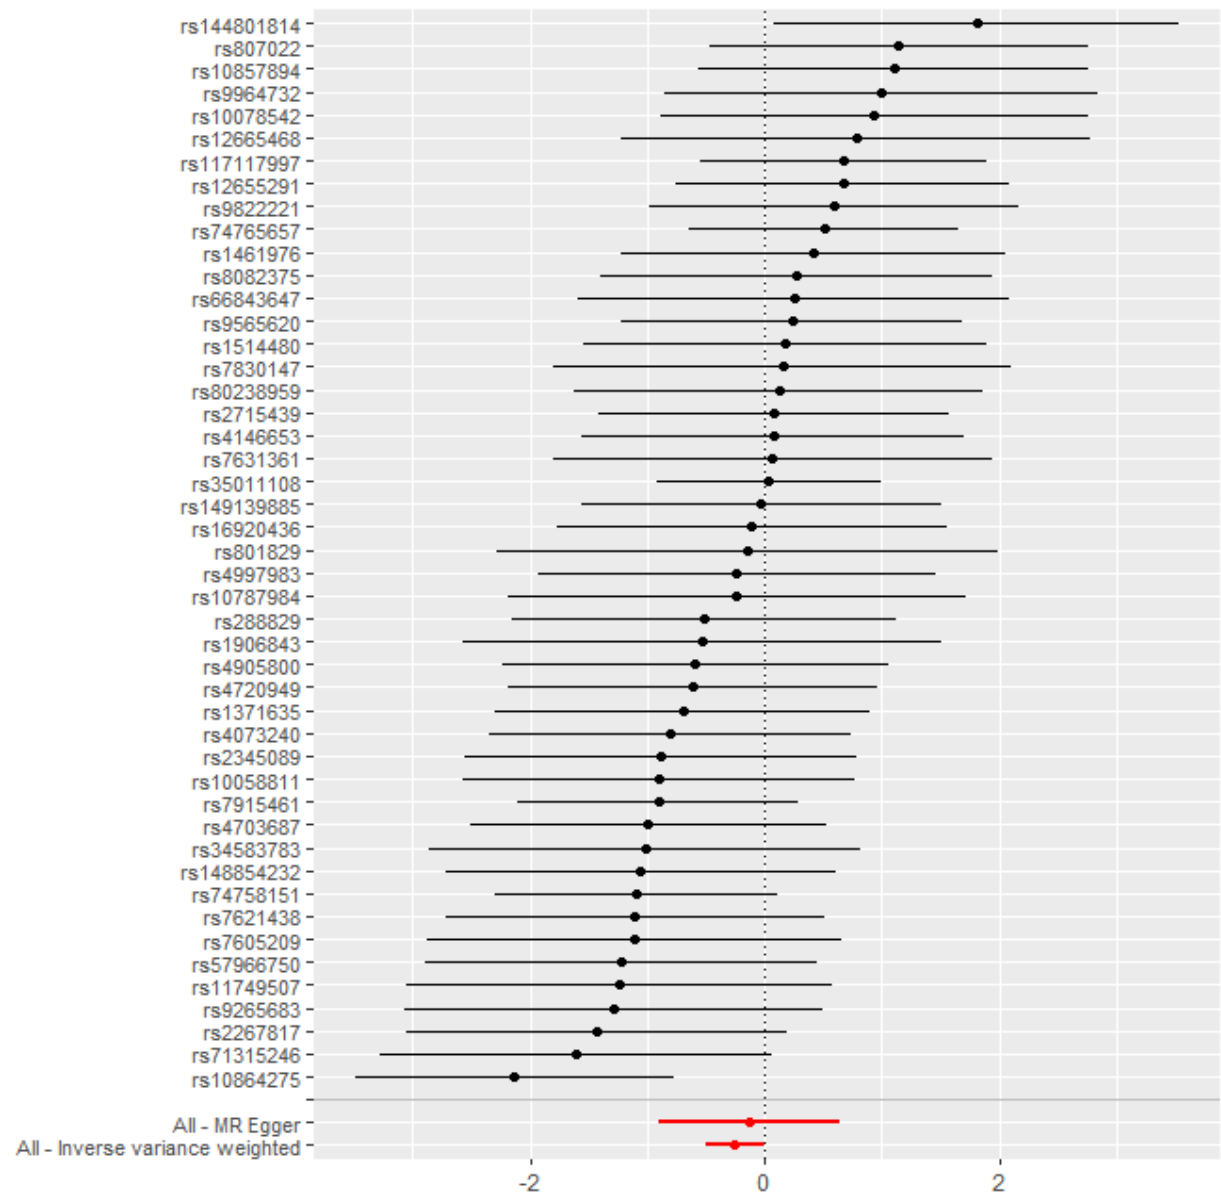

' || id:ebi-a-GCST90016959' on 'Malignant neoplasm of stomach (all cancers excluded)' || id:finn-b-C3\_STOMACH\_

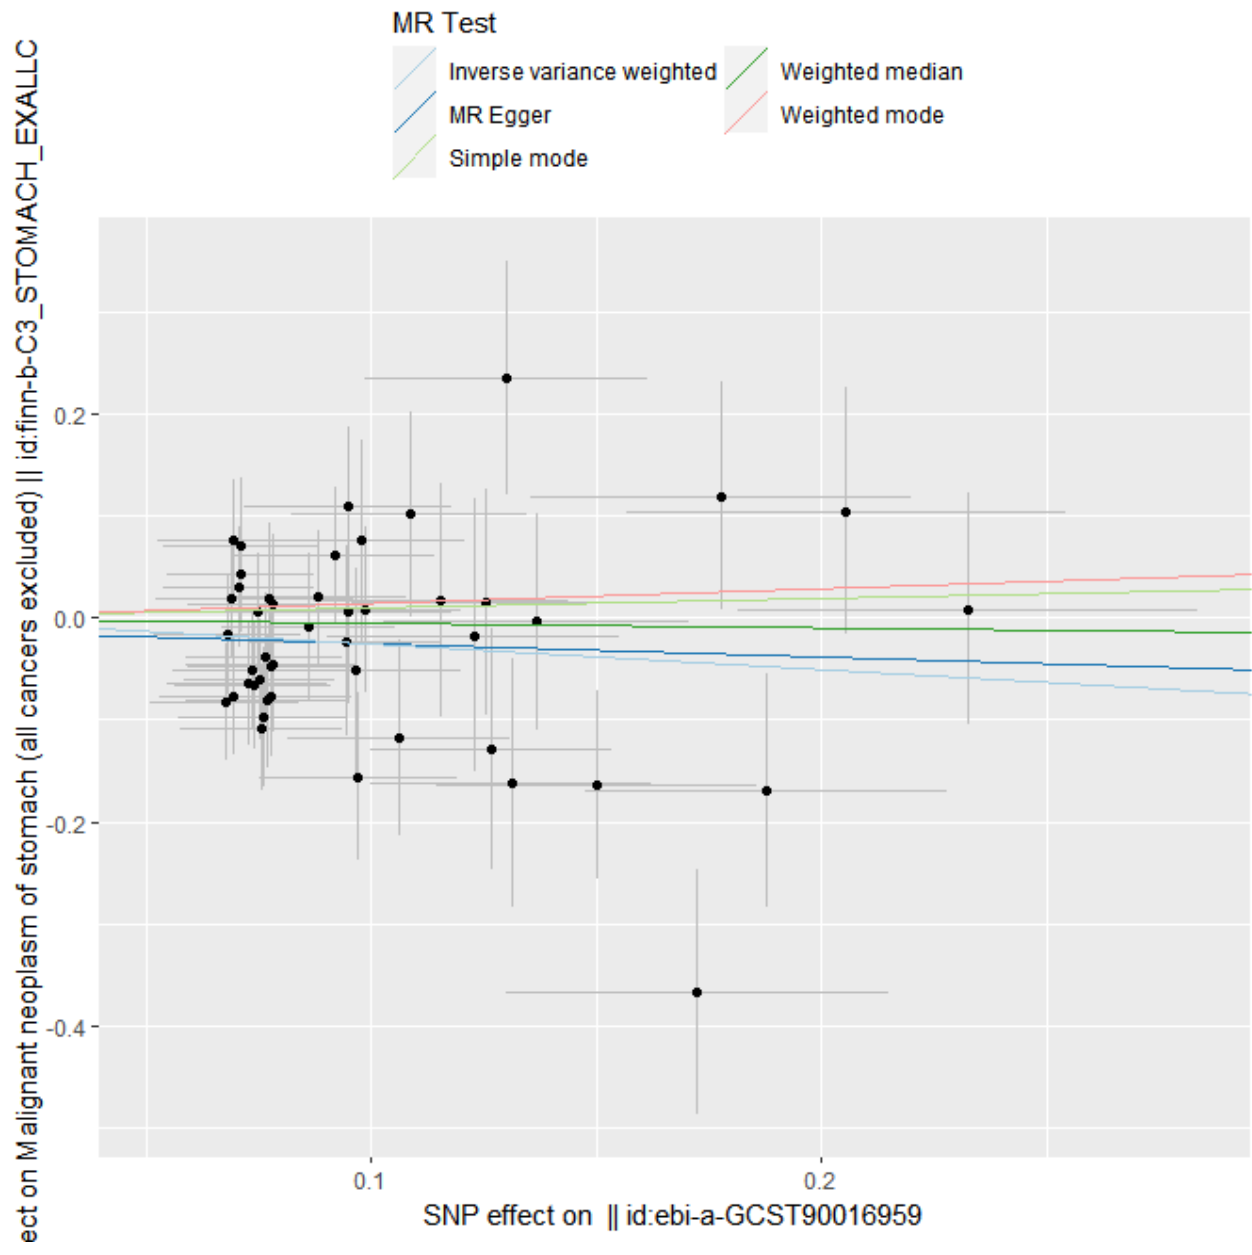



**Figure 89** Leave-one-out analysis, funnel plot, MR effect size and scatter plot for gut microbiota abundance (genus *Catenibacterium* id.2153) on gastric cancer

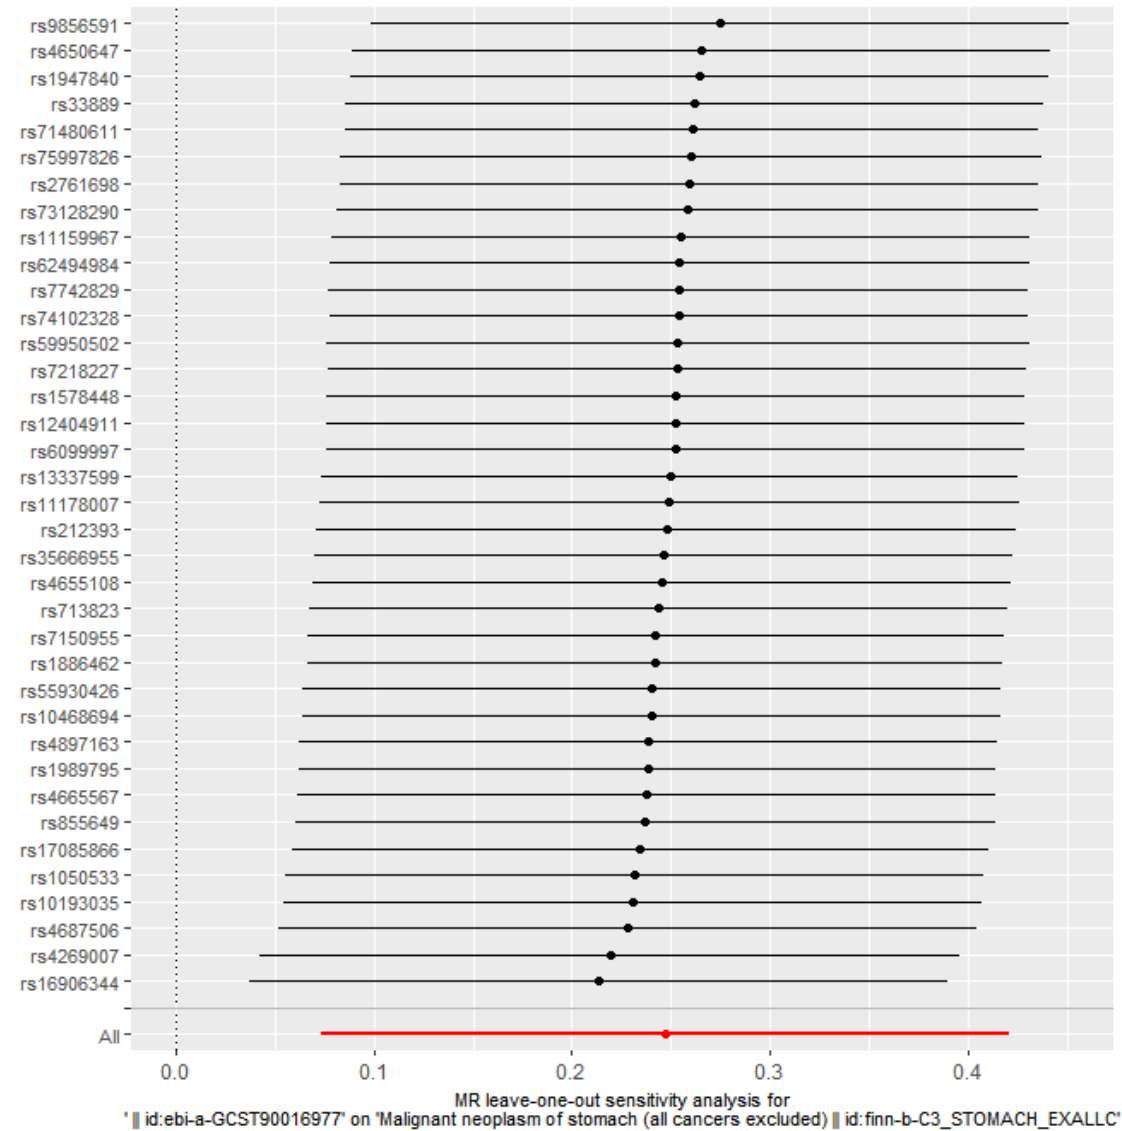

MR Method

- Inverse variance weighted
- MR Egger

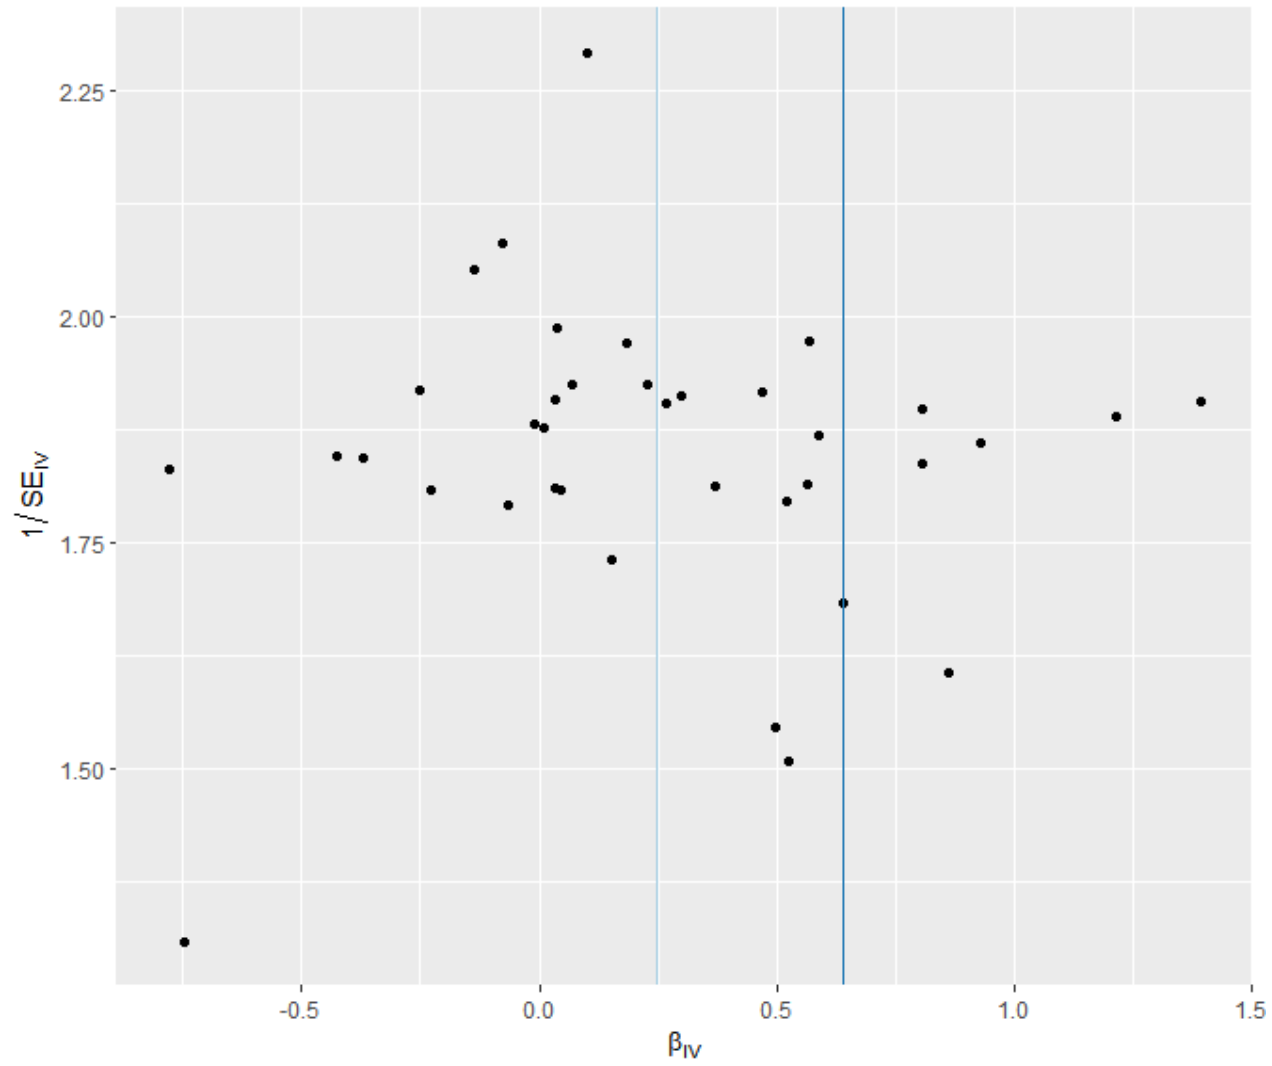

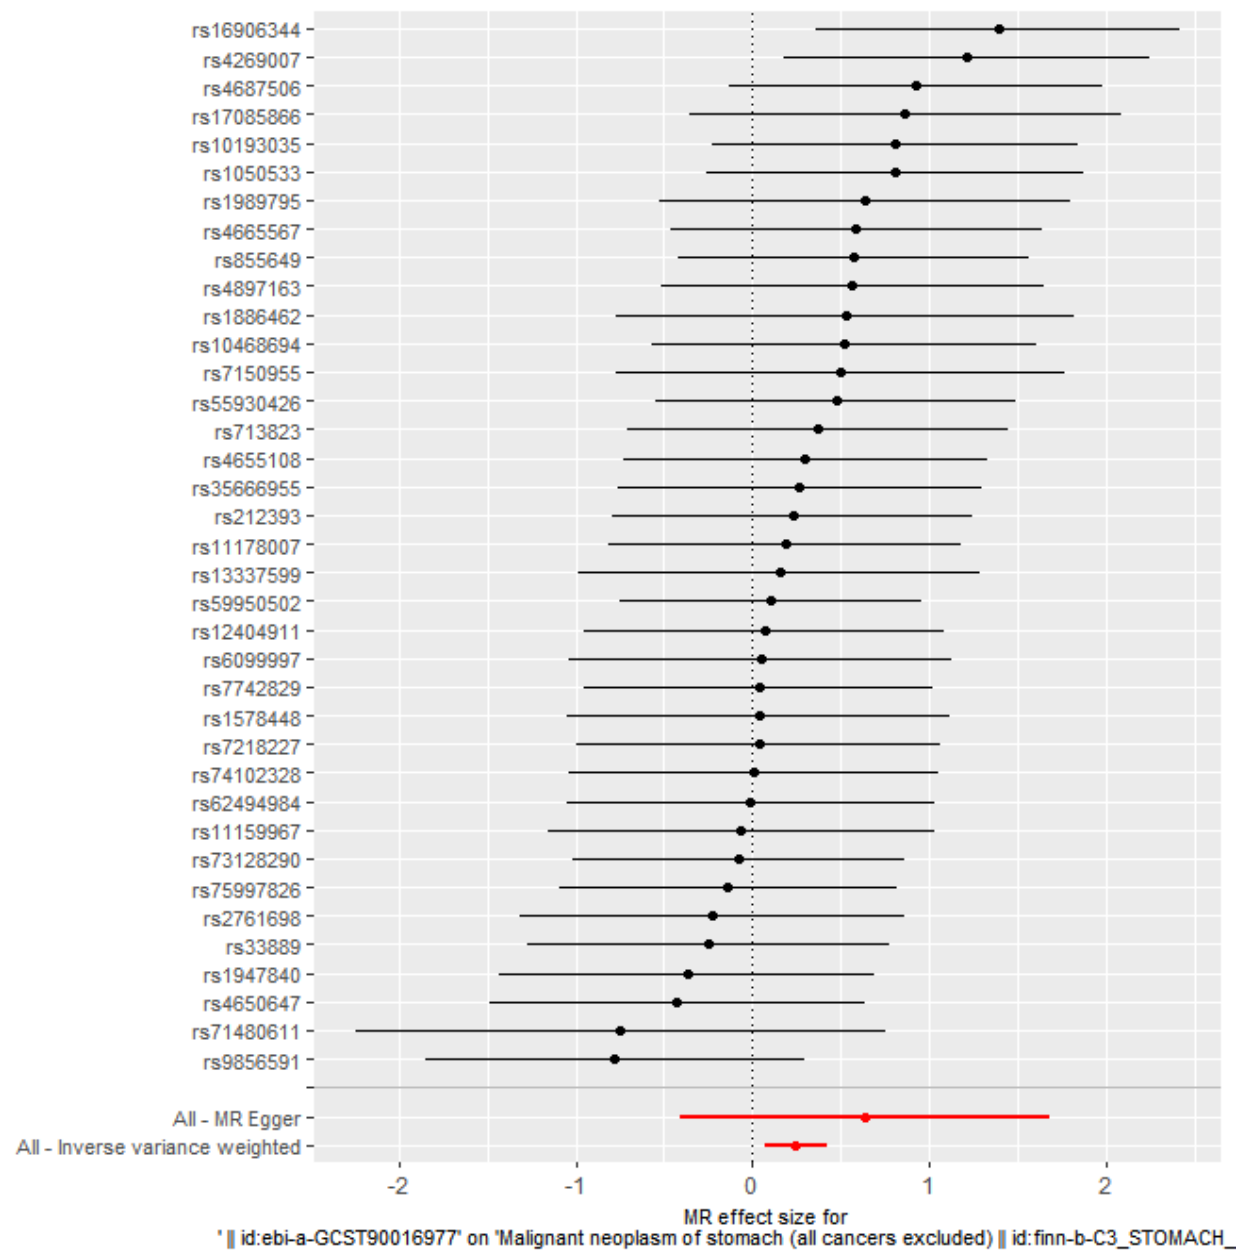

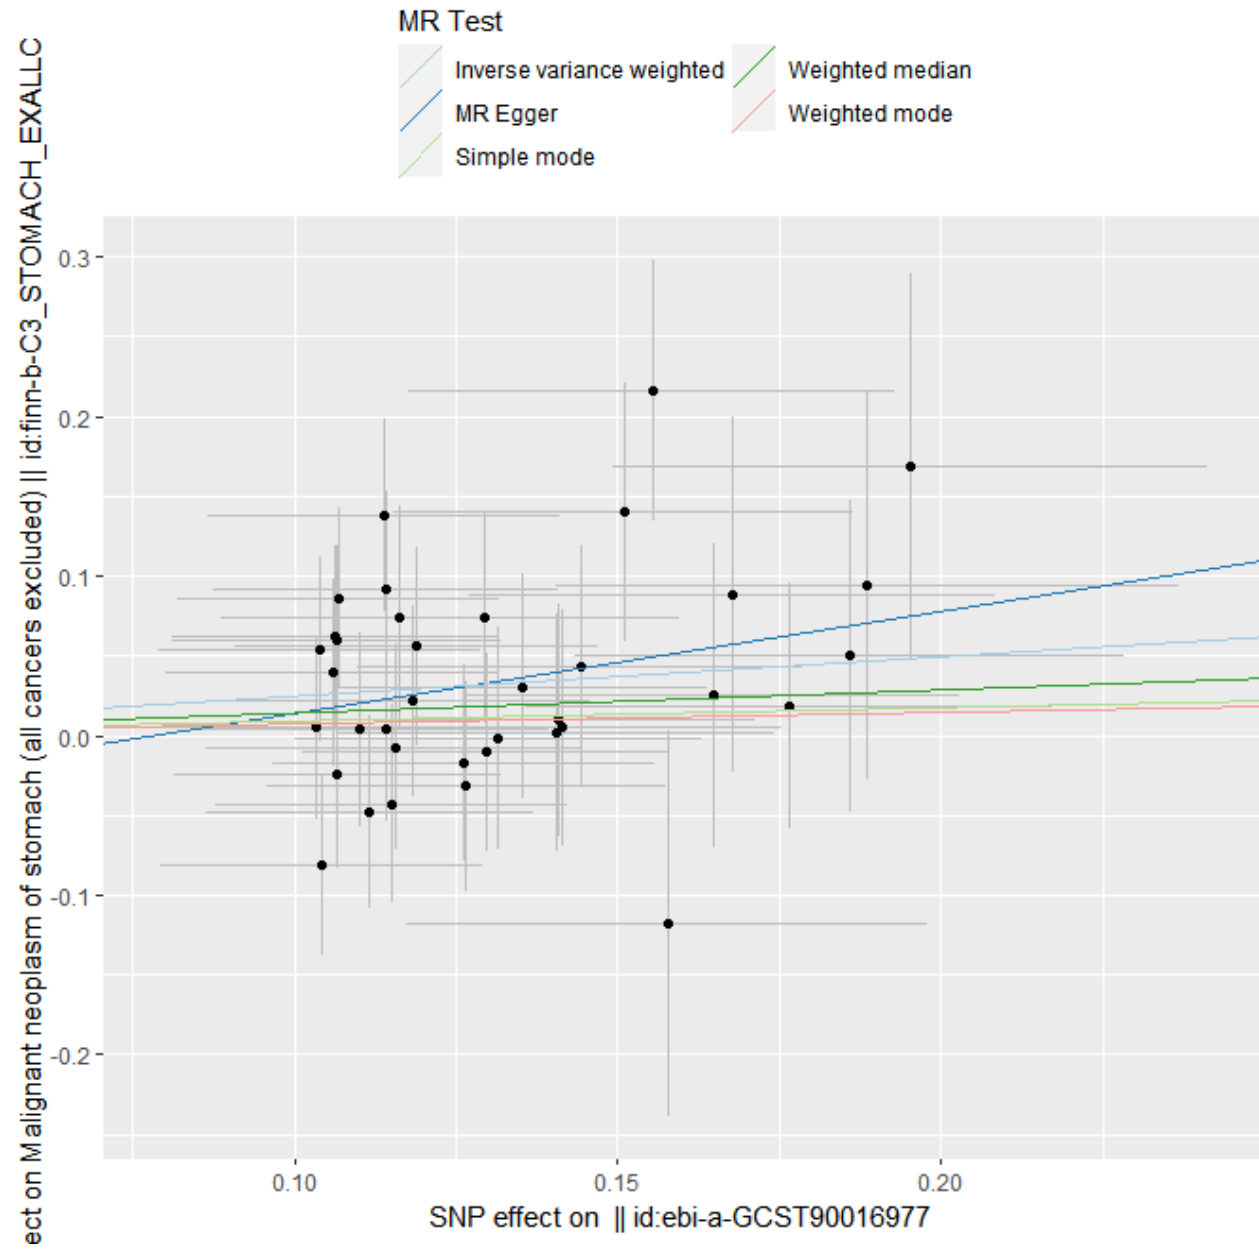

**Figure 90** Leave-one-out analysis, funnel plot, MR effect size and scatter plot for gut microbiota abundance (genus Coprococcus3 id.11303) on gastric cancer

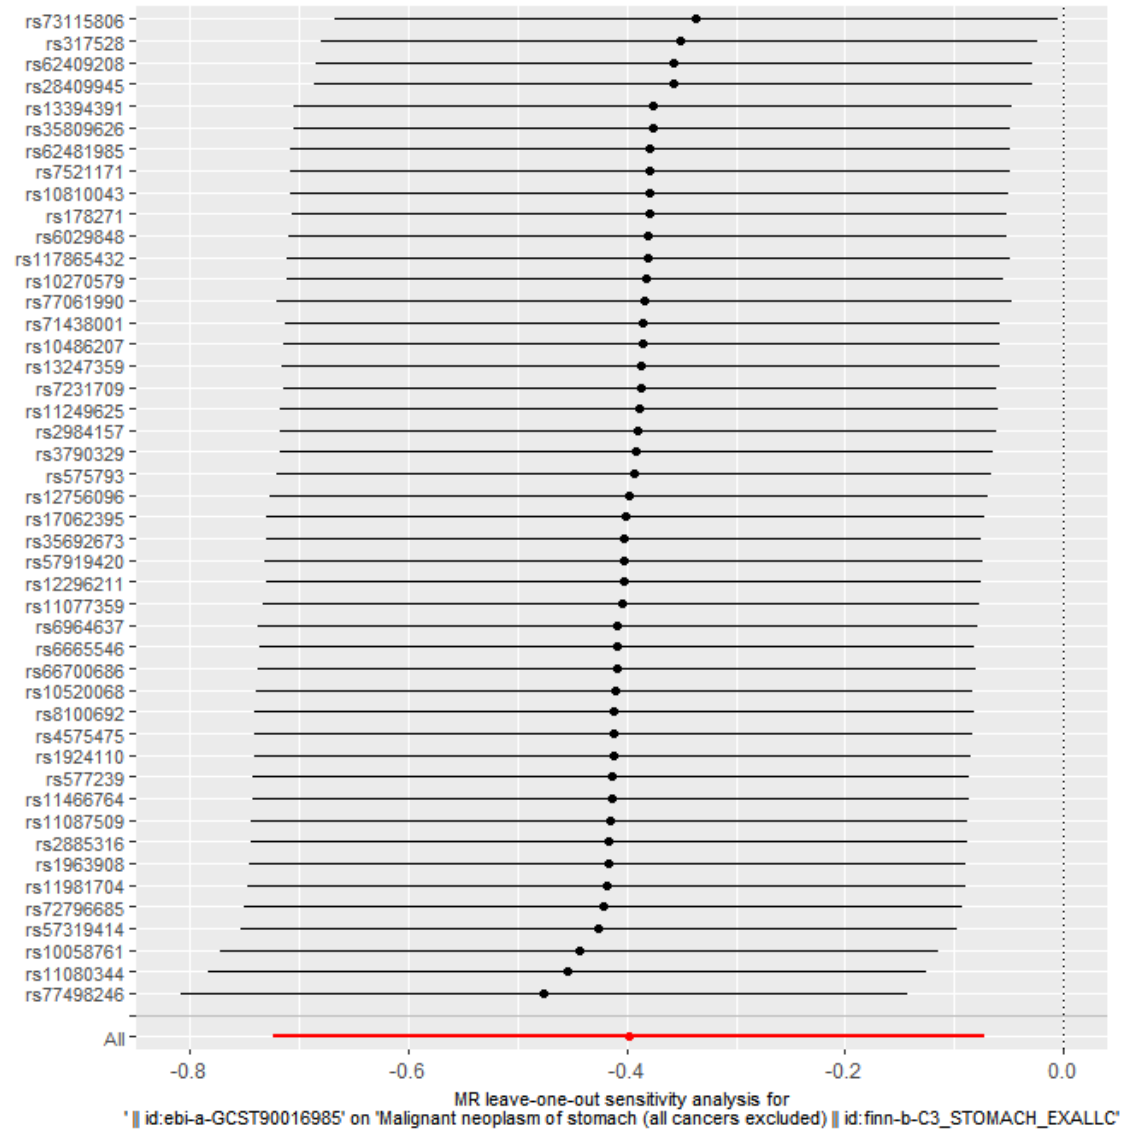

MR Method

- Inverse variance weighted
- MR Egger

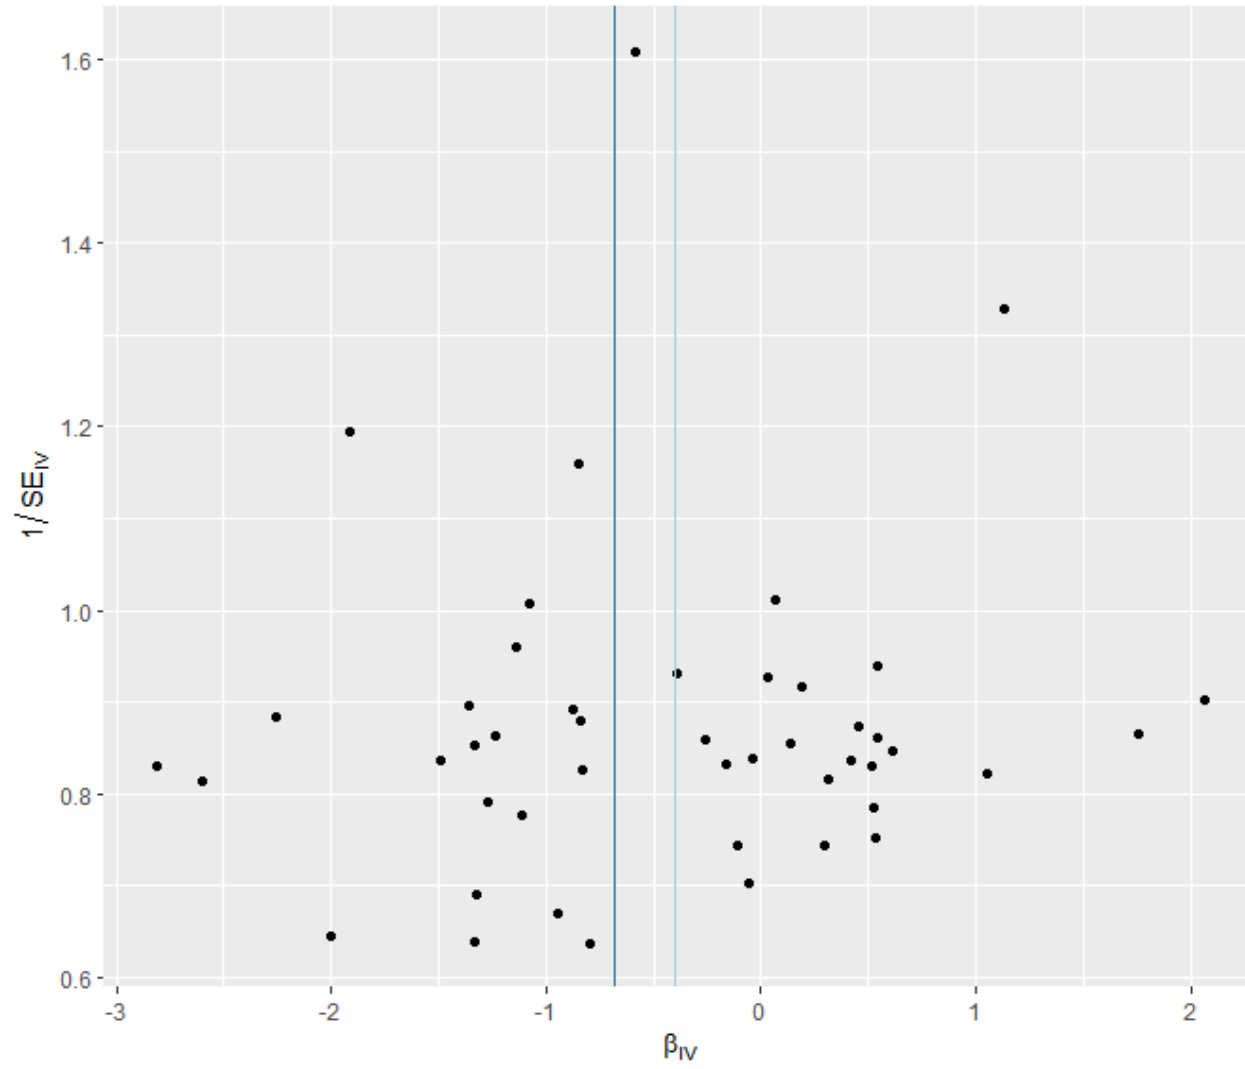

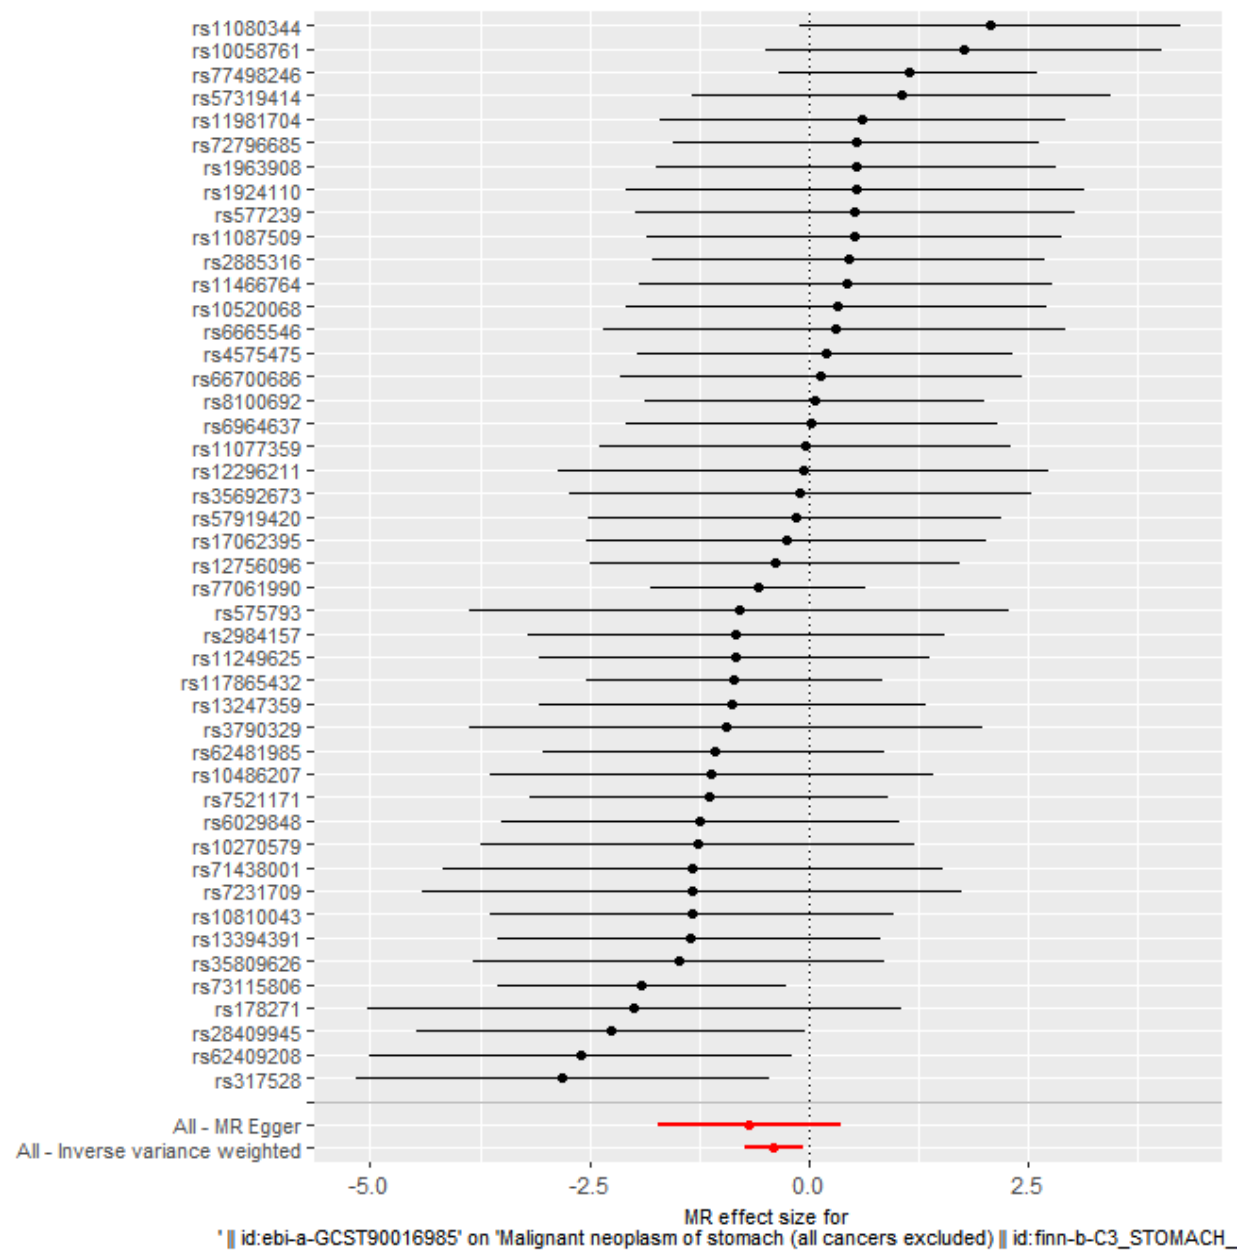

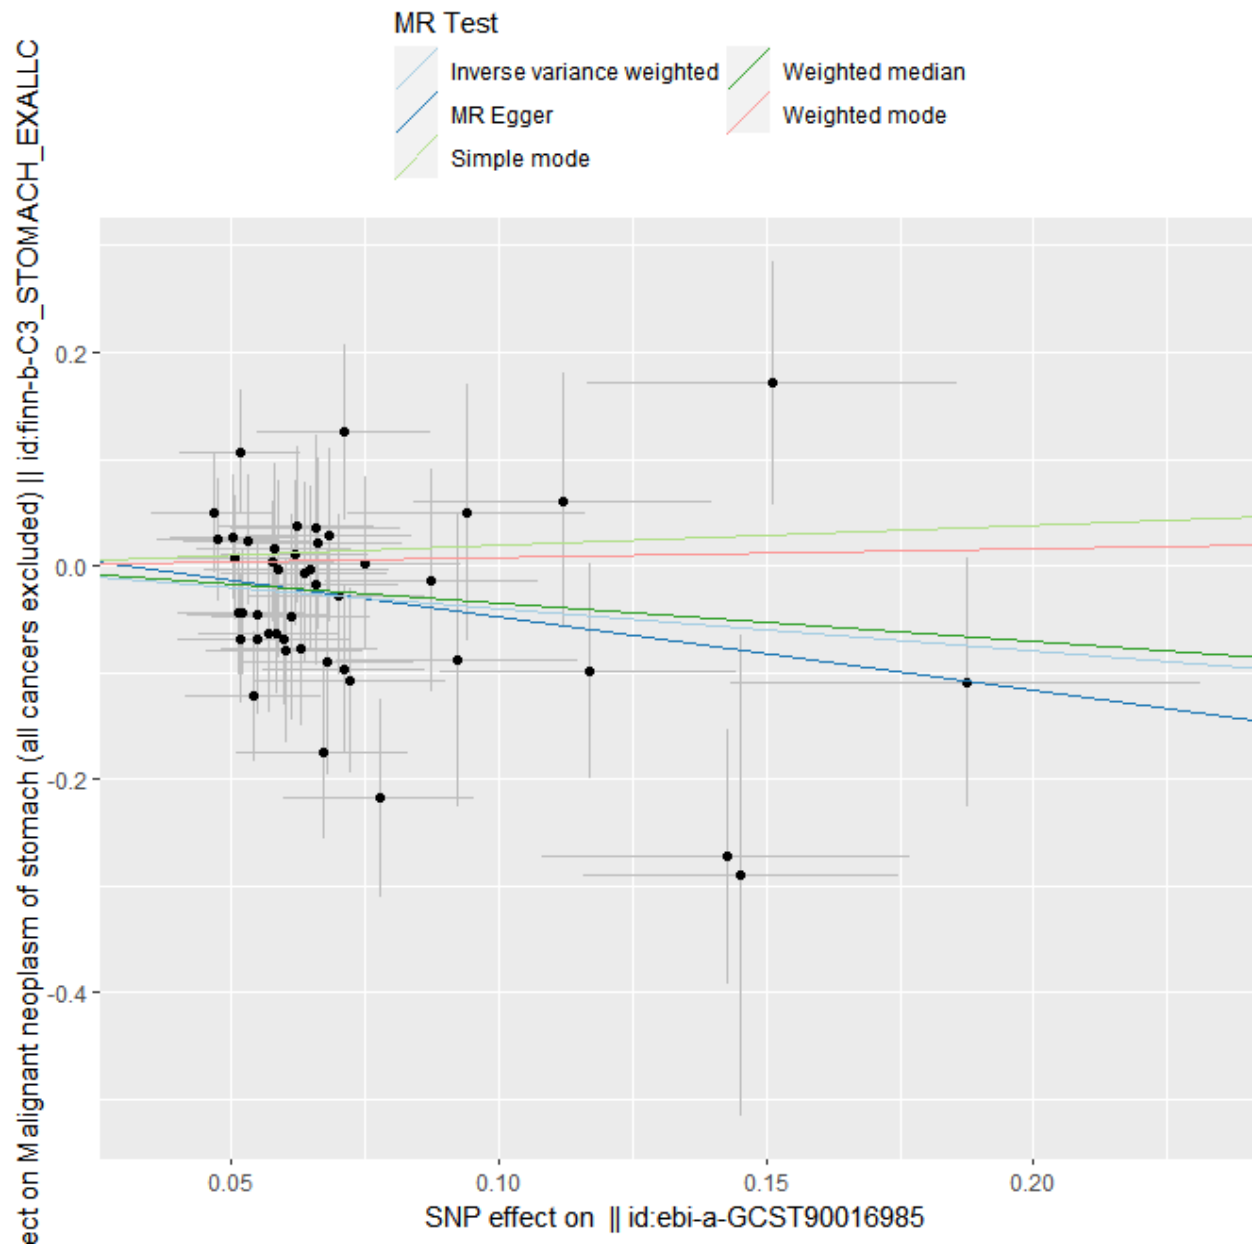



**Figure 91** Leave-one-out analysis, funnel plot, MR effect size and scatter plot for gut microbiota abundance (genus Roseburia id.2012) on gastric cancer

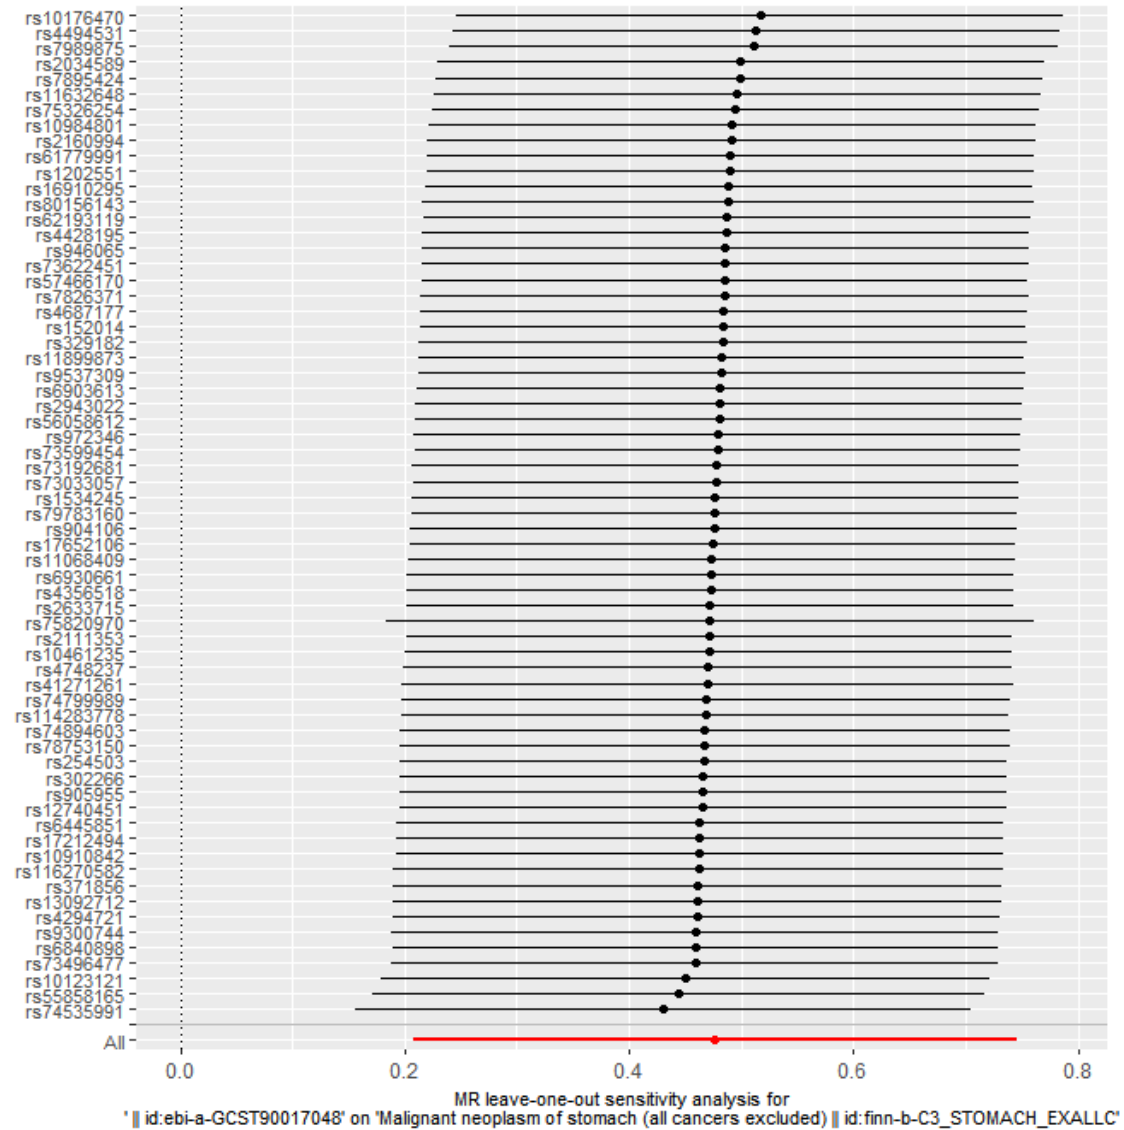

MR Method

- Inverse variance weighted
- MR Egger

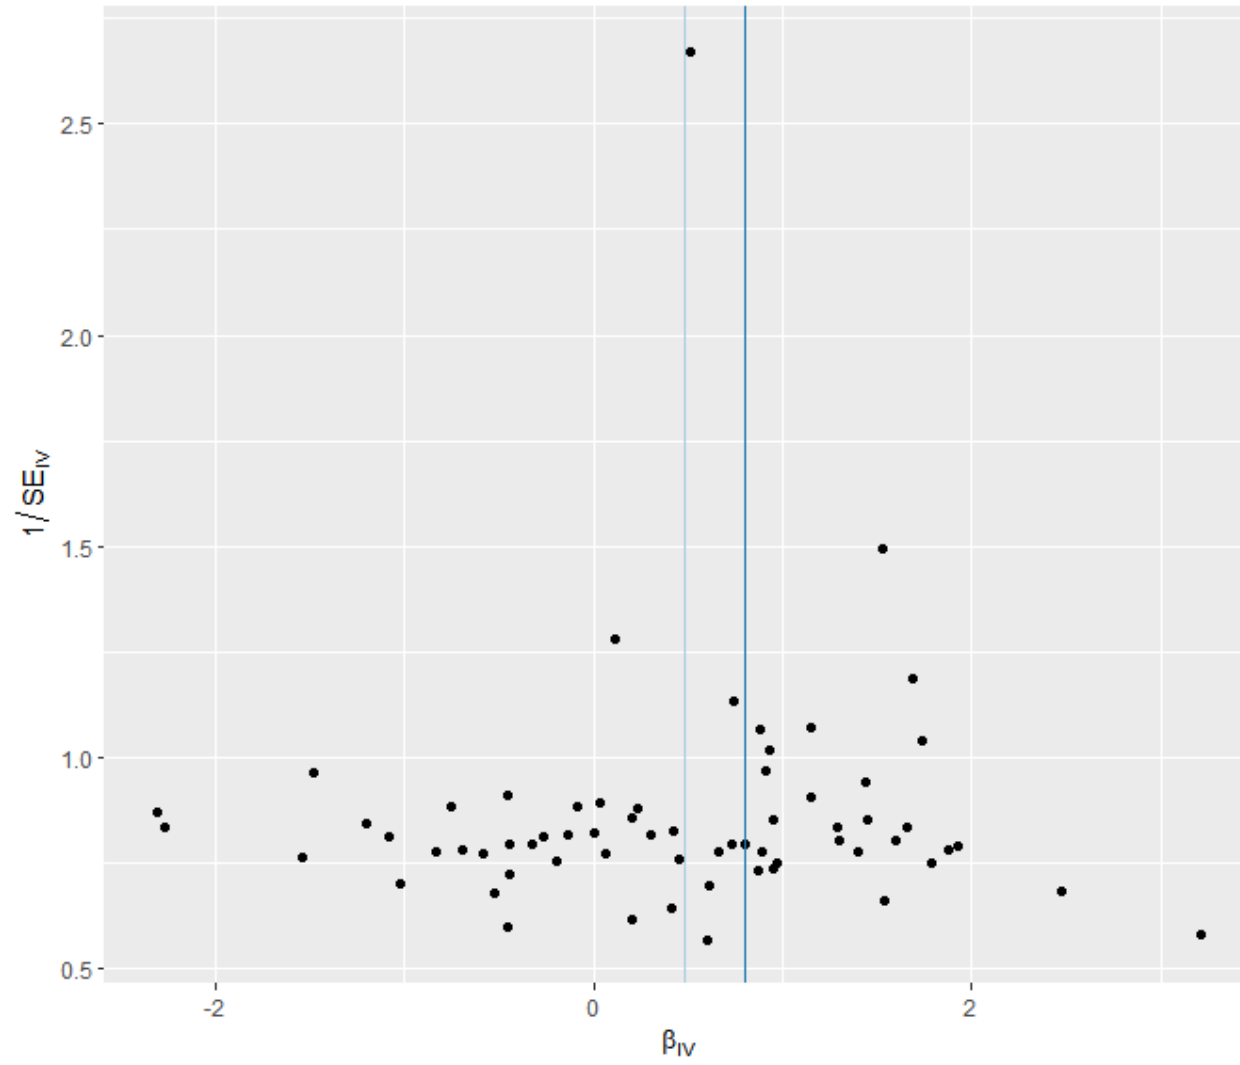

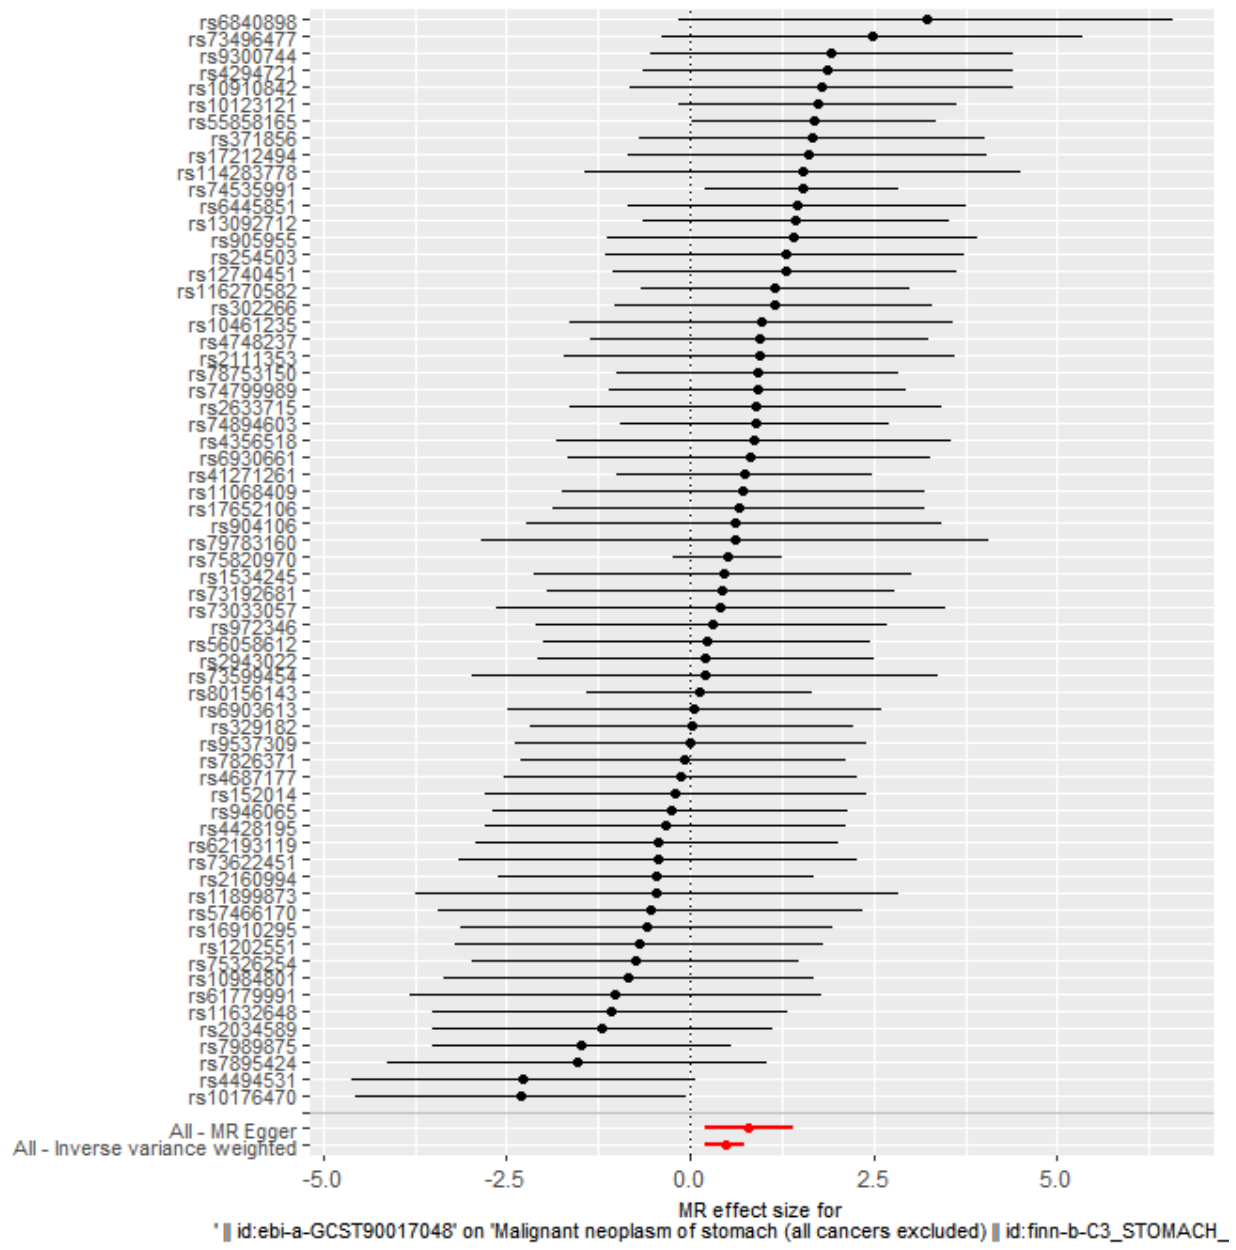

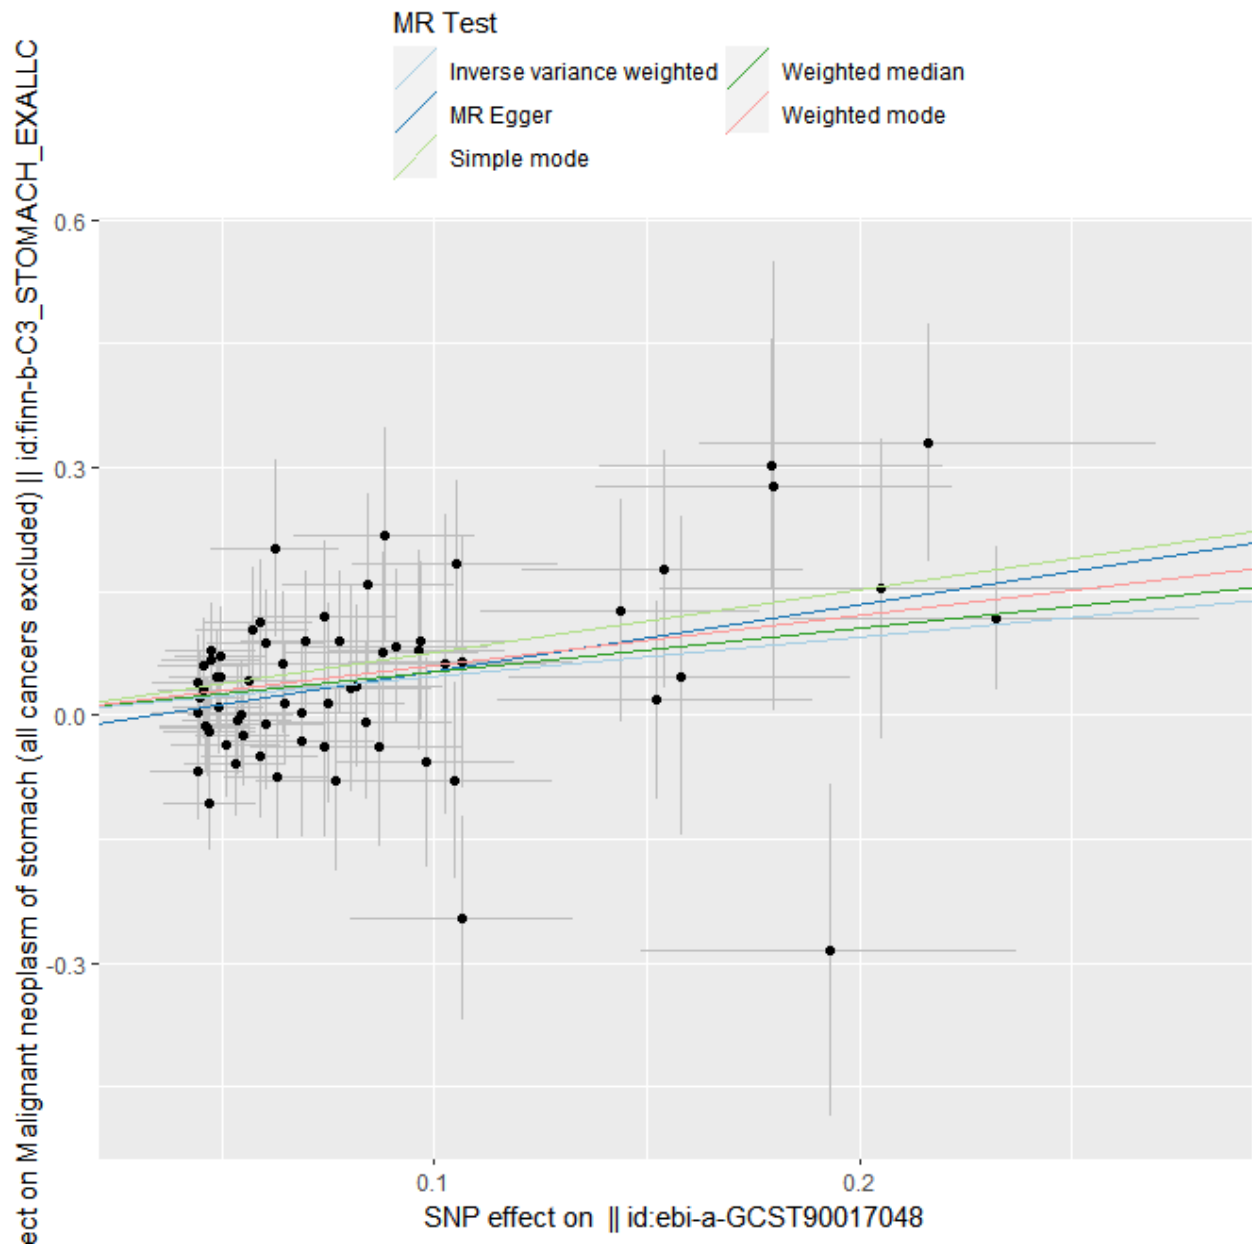

**Figure 92** Leave-one-out analysis, funnel plot, MR effect size and scatter plot for gut microbiota abundance (genus Ruminococcaceae UCG011 id.11368) on gastric cancer

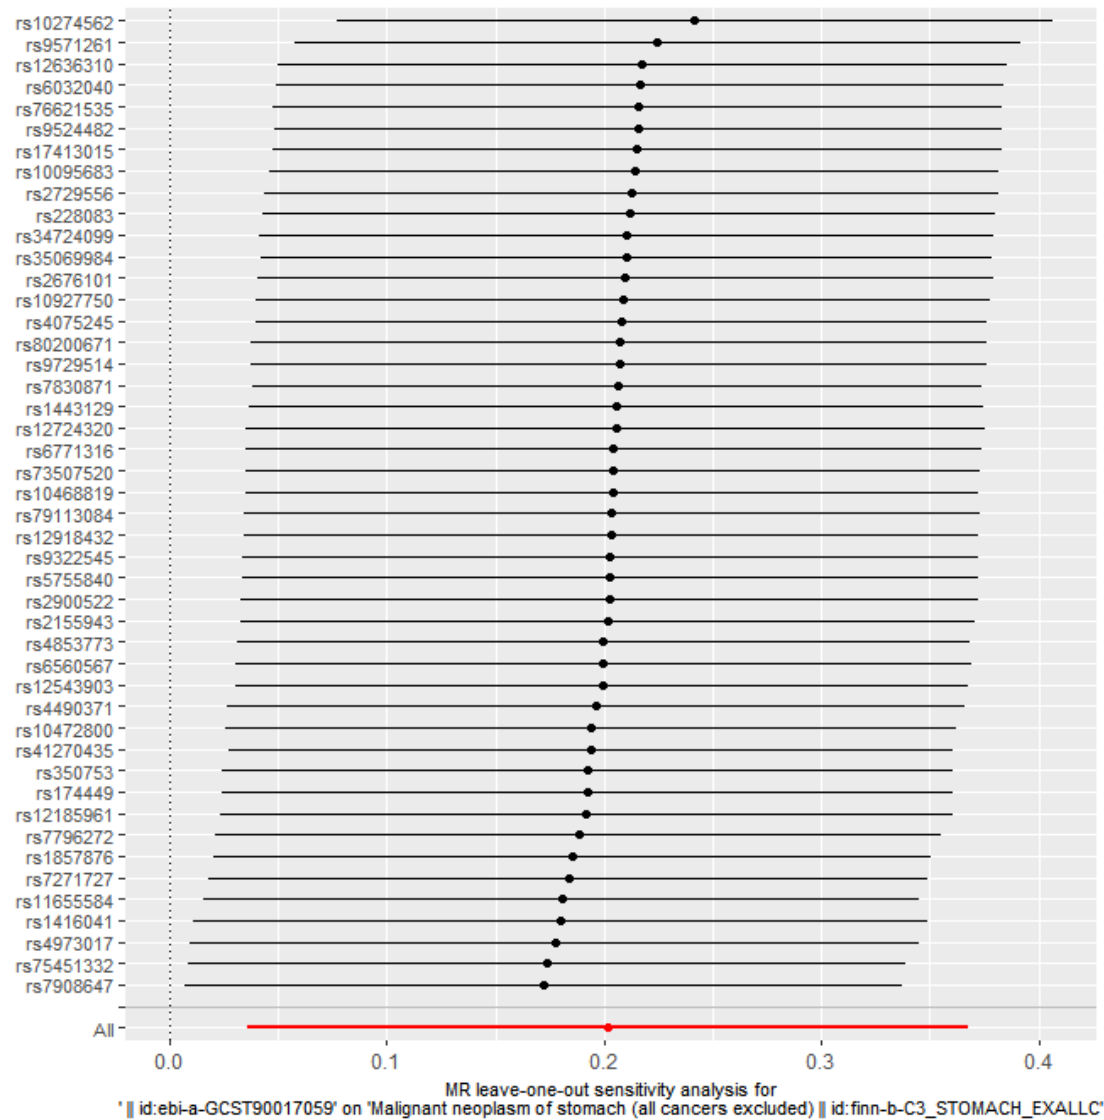

MR Method

- Inverse variance weighted
- MR Egger

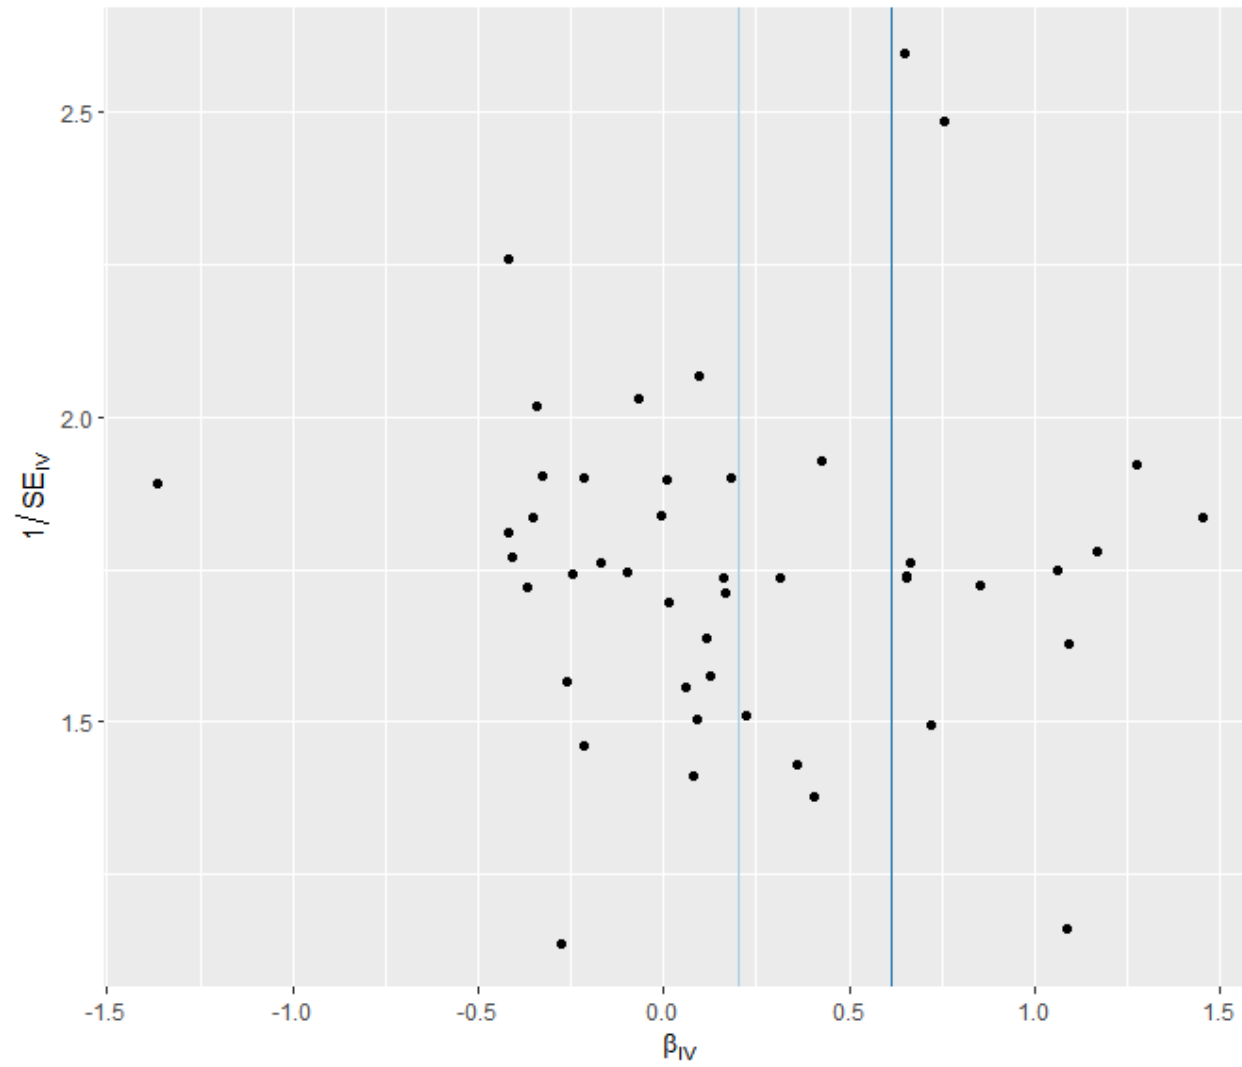

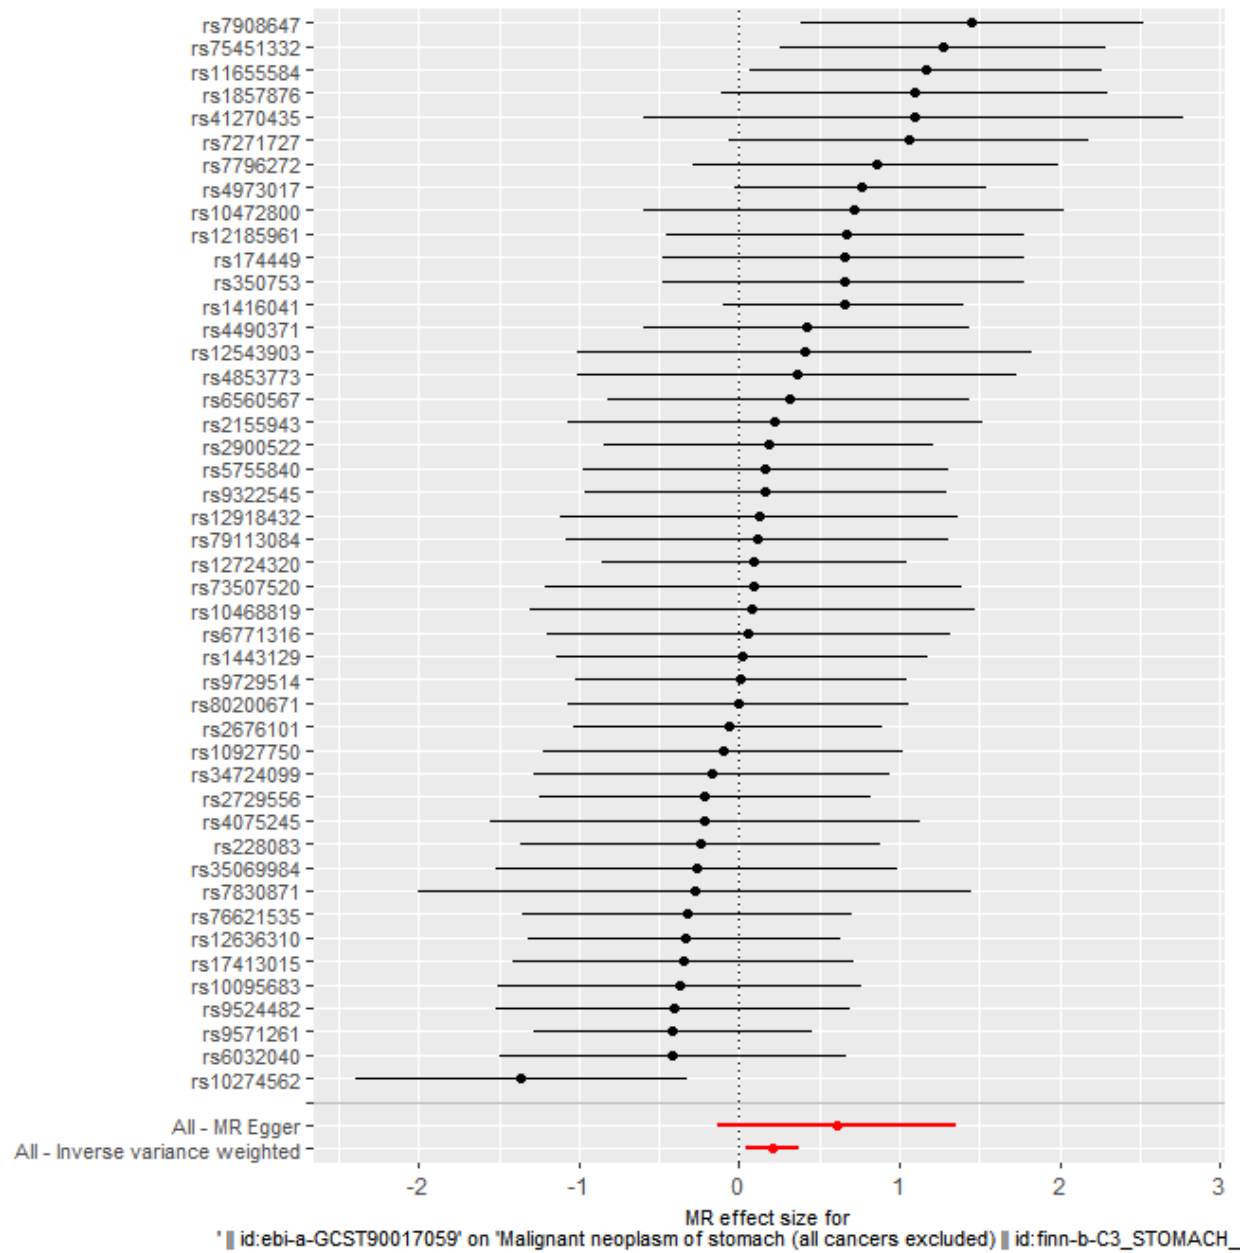

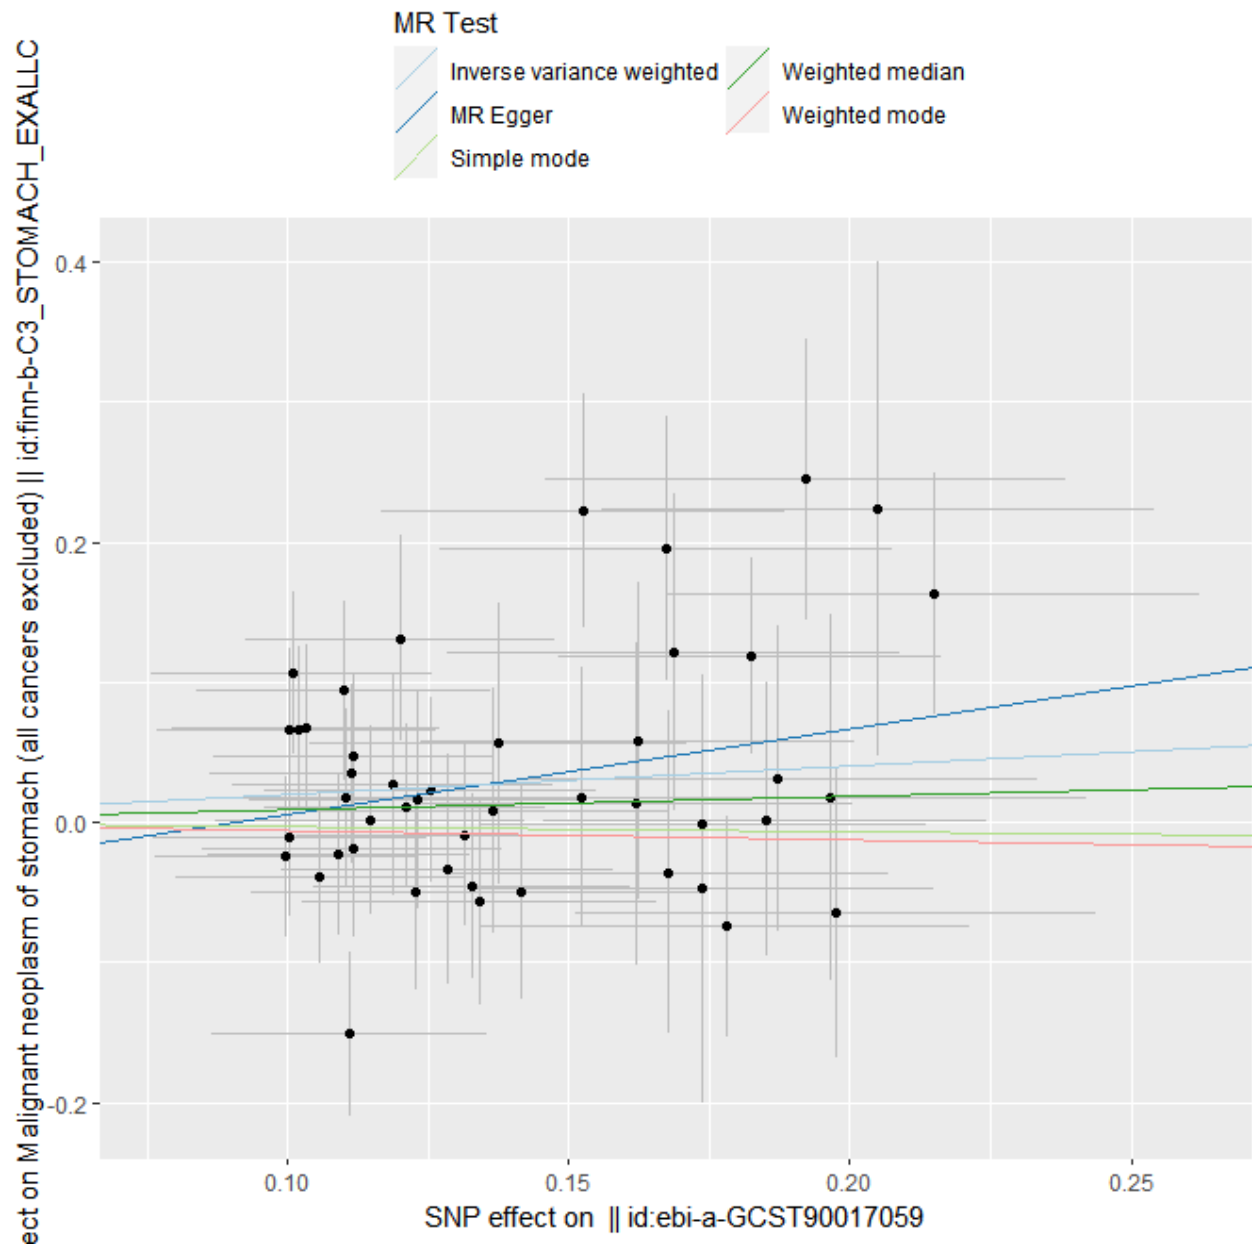



**Figure 93** Leave-one-out analysis, funnel plot, MR effect size and scatter plot for gut microbiota abundance (unknown genus id.1000005472) on gastric cancer

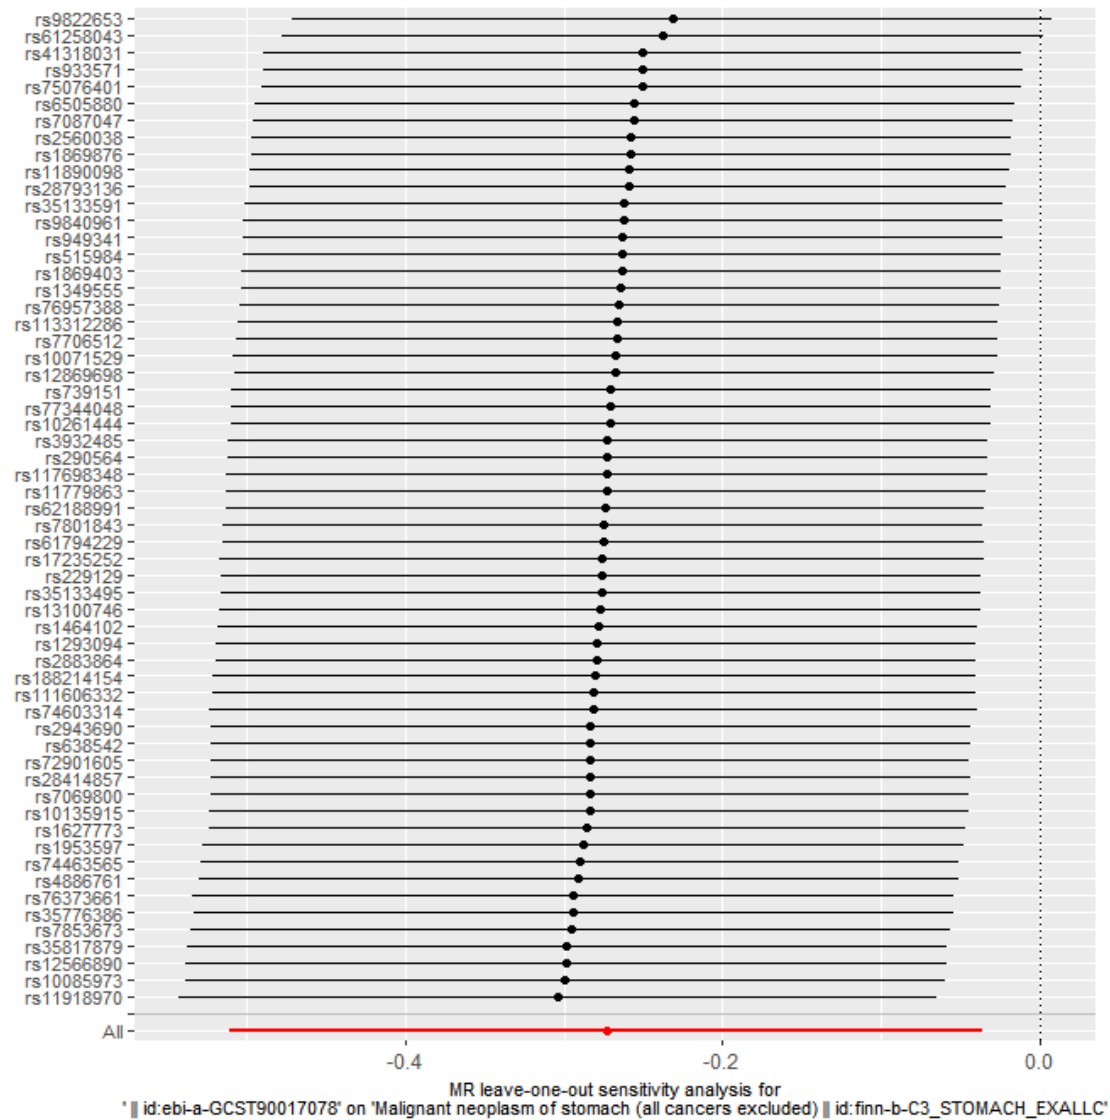

MR Method  
Inverse variance weighted  
MR Egger

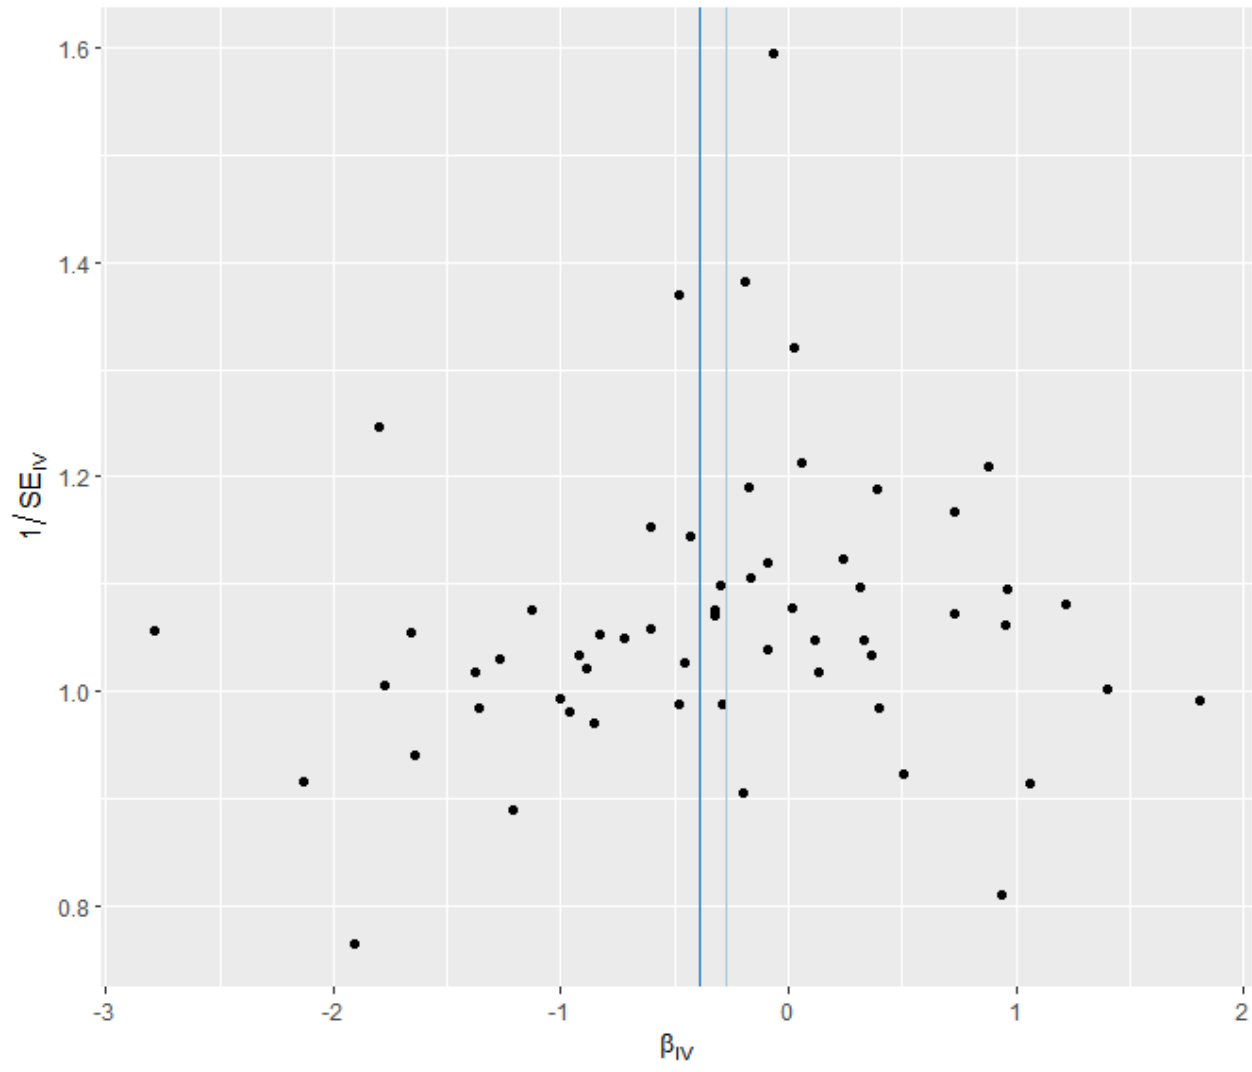

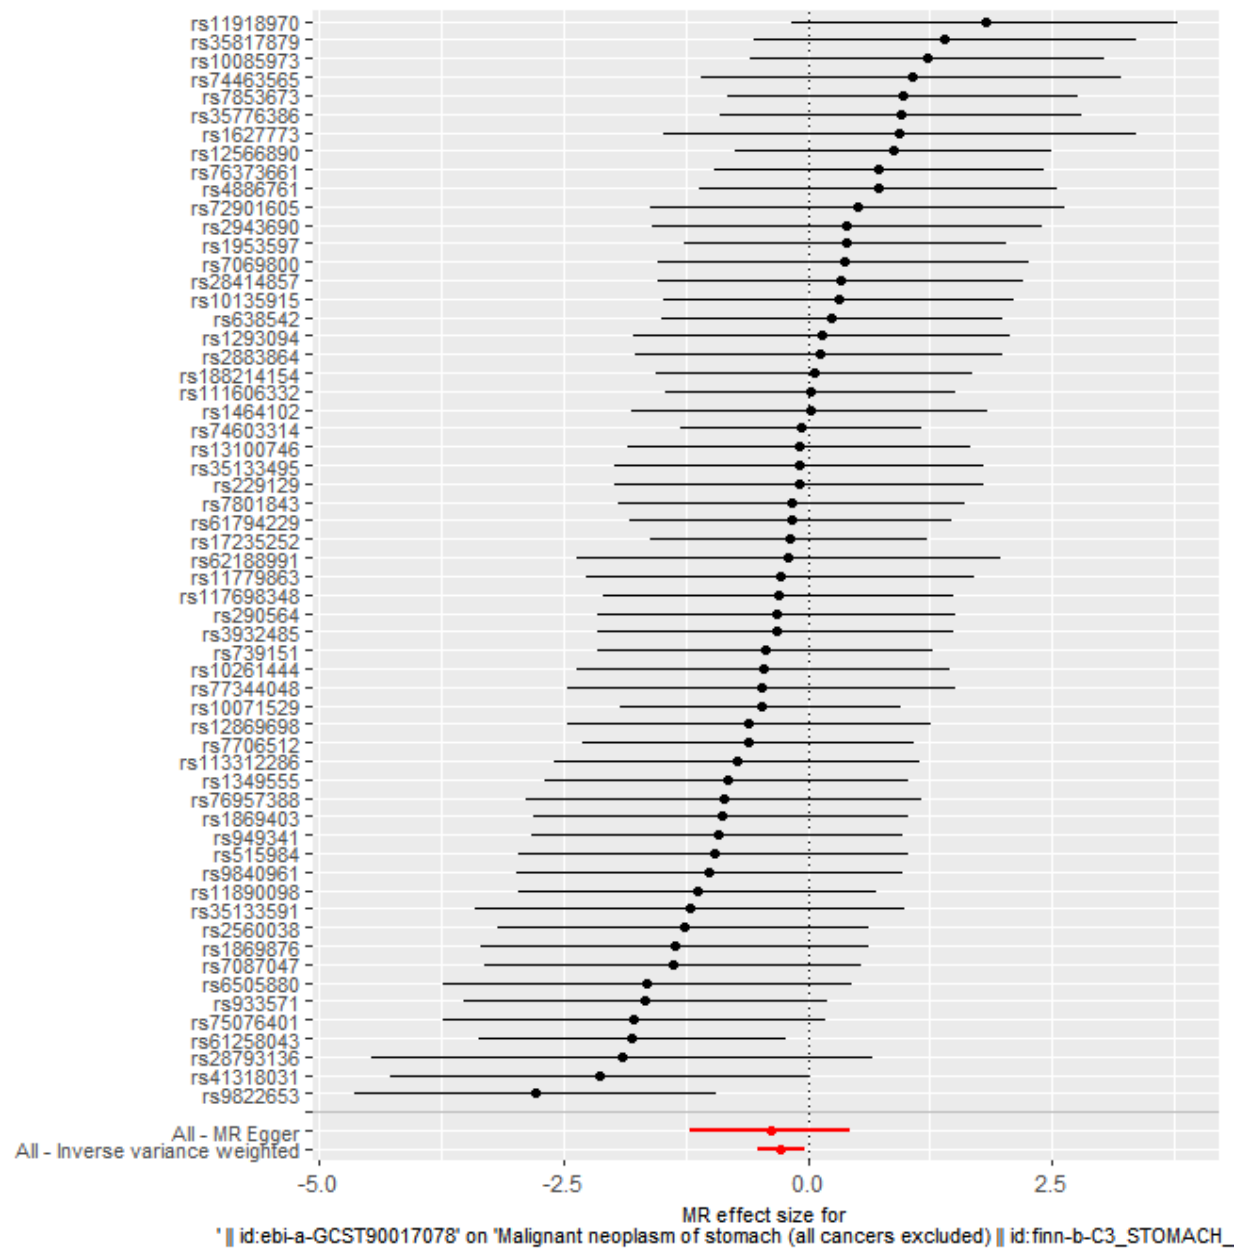

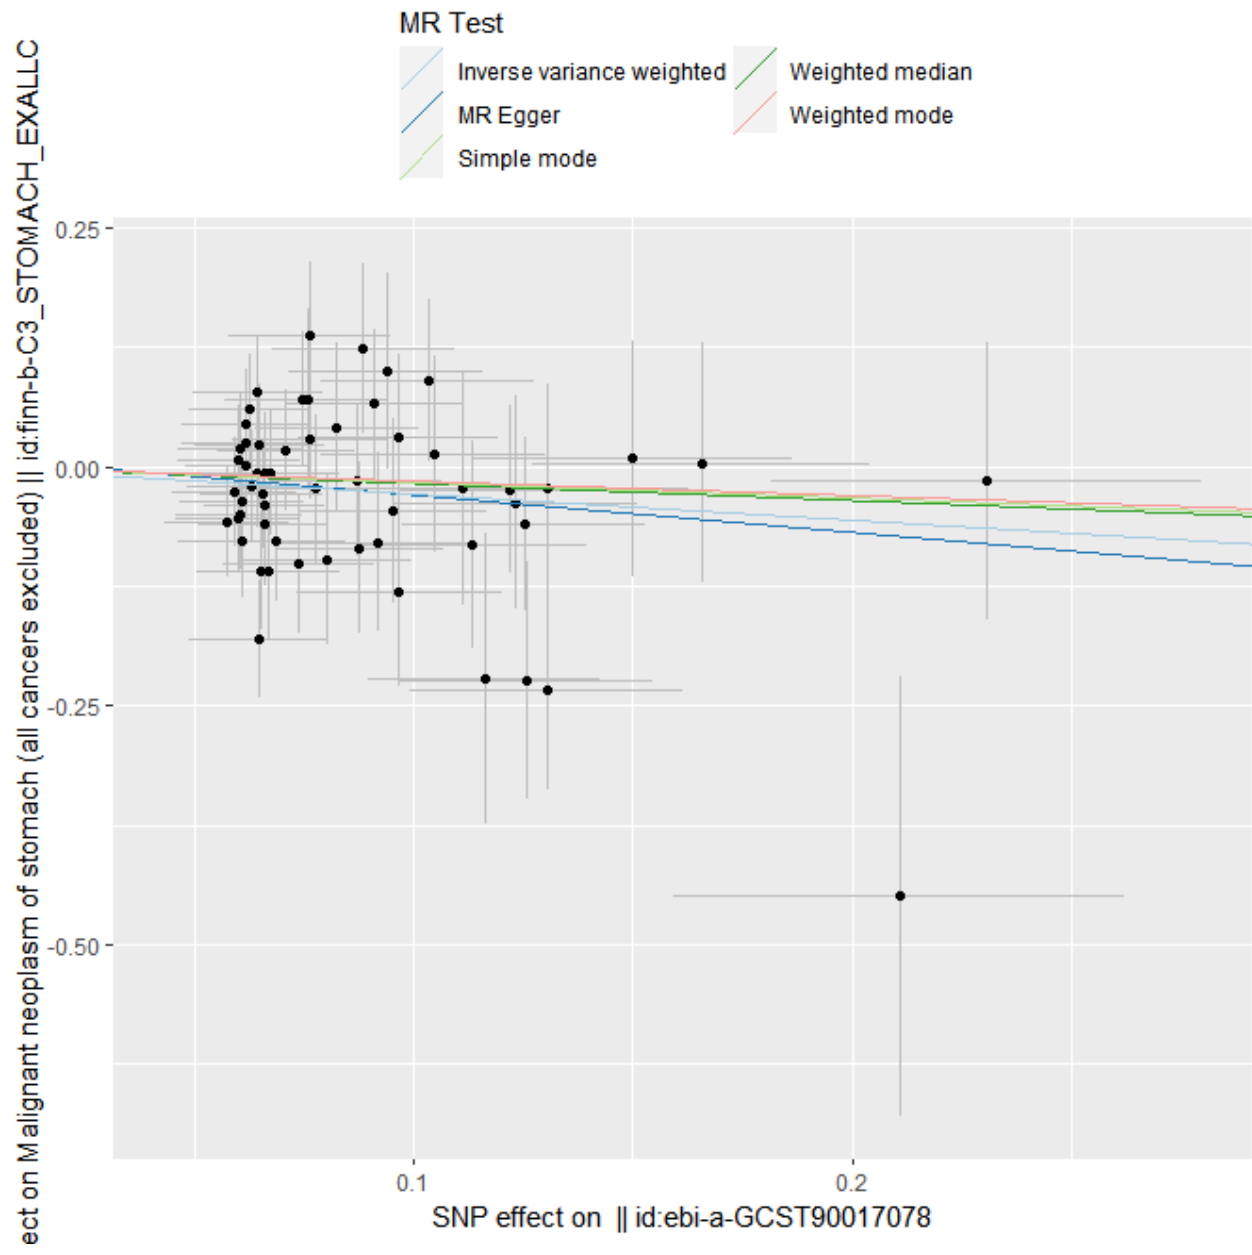

**Figure 94** Leave-one-out analysis, funnel plot, MR effect size and scatter plot for gut microbiota abundance (unknown genus id.2755) on gastric cancer

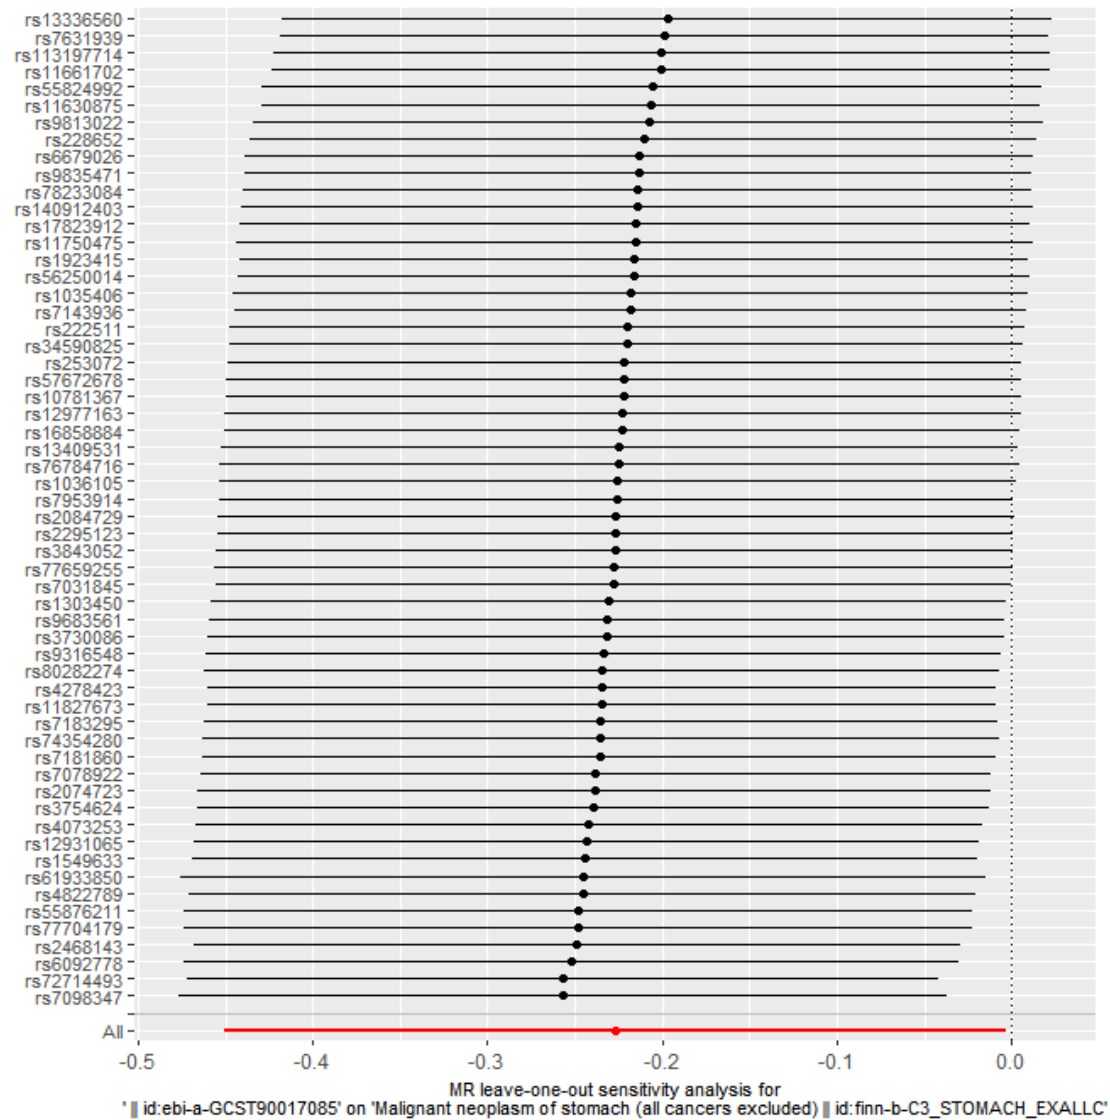

MR Method

- Inverse variance weighted
- MR Egger

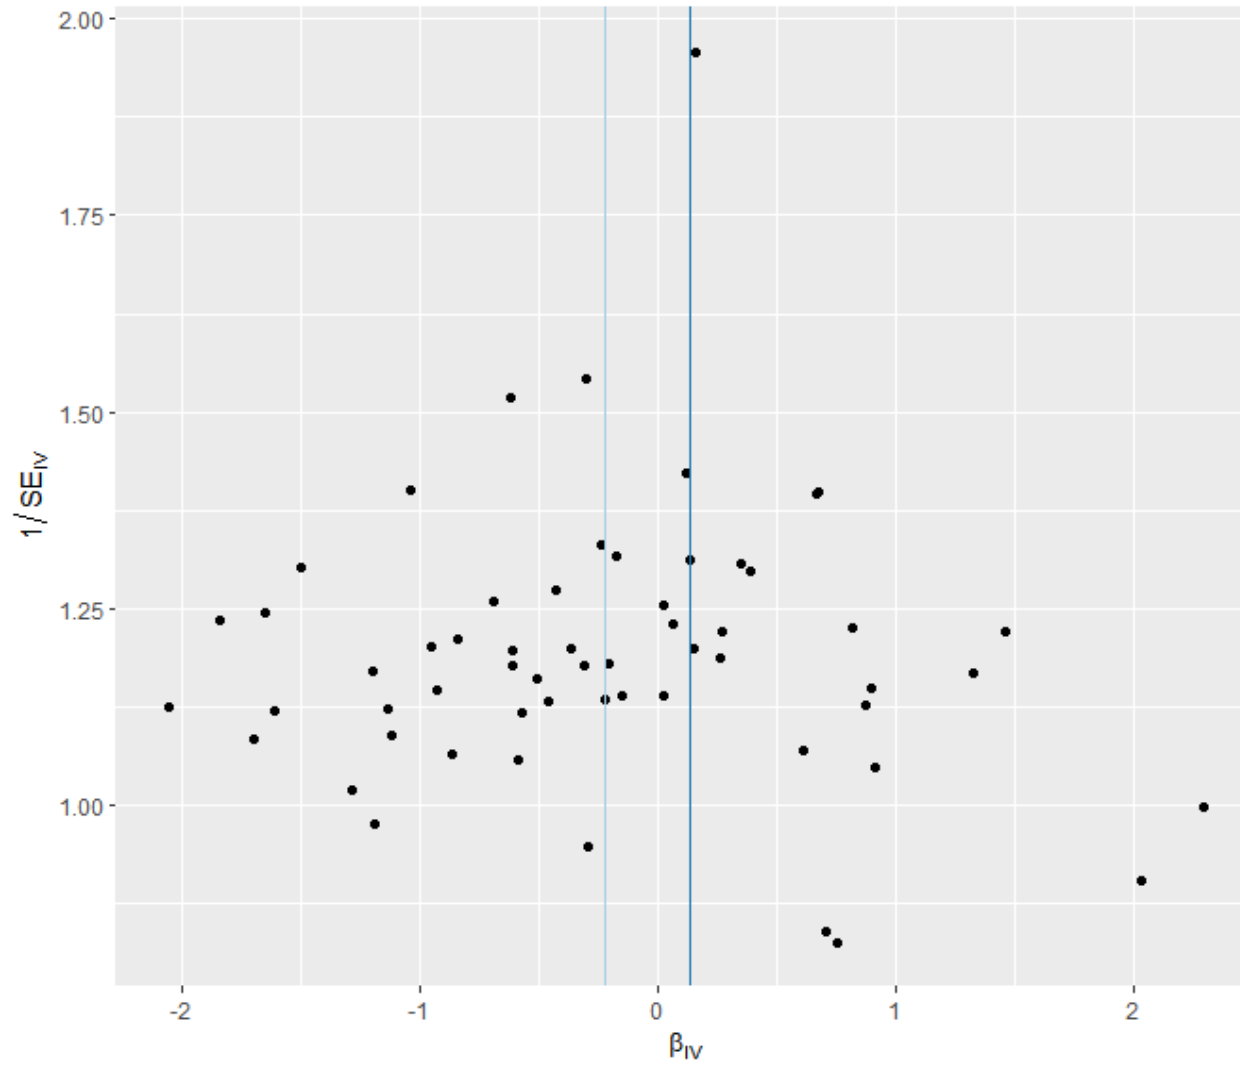

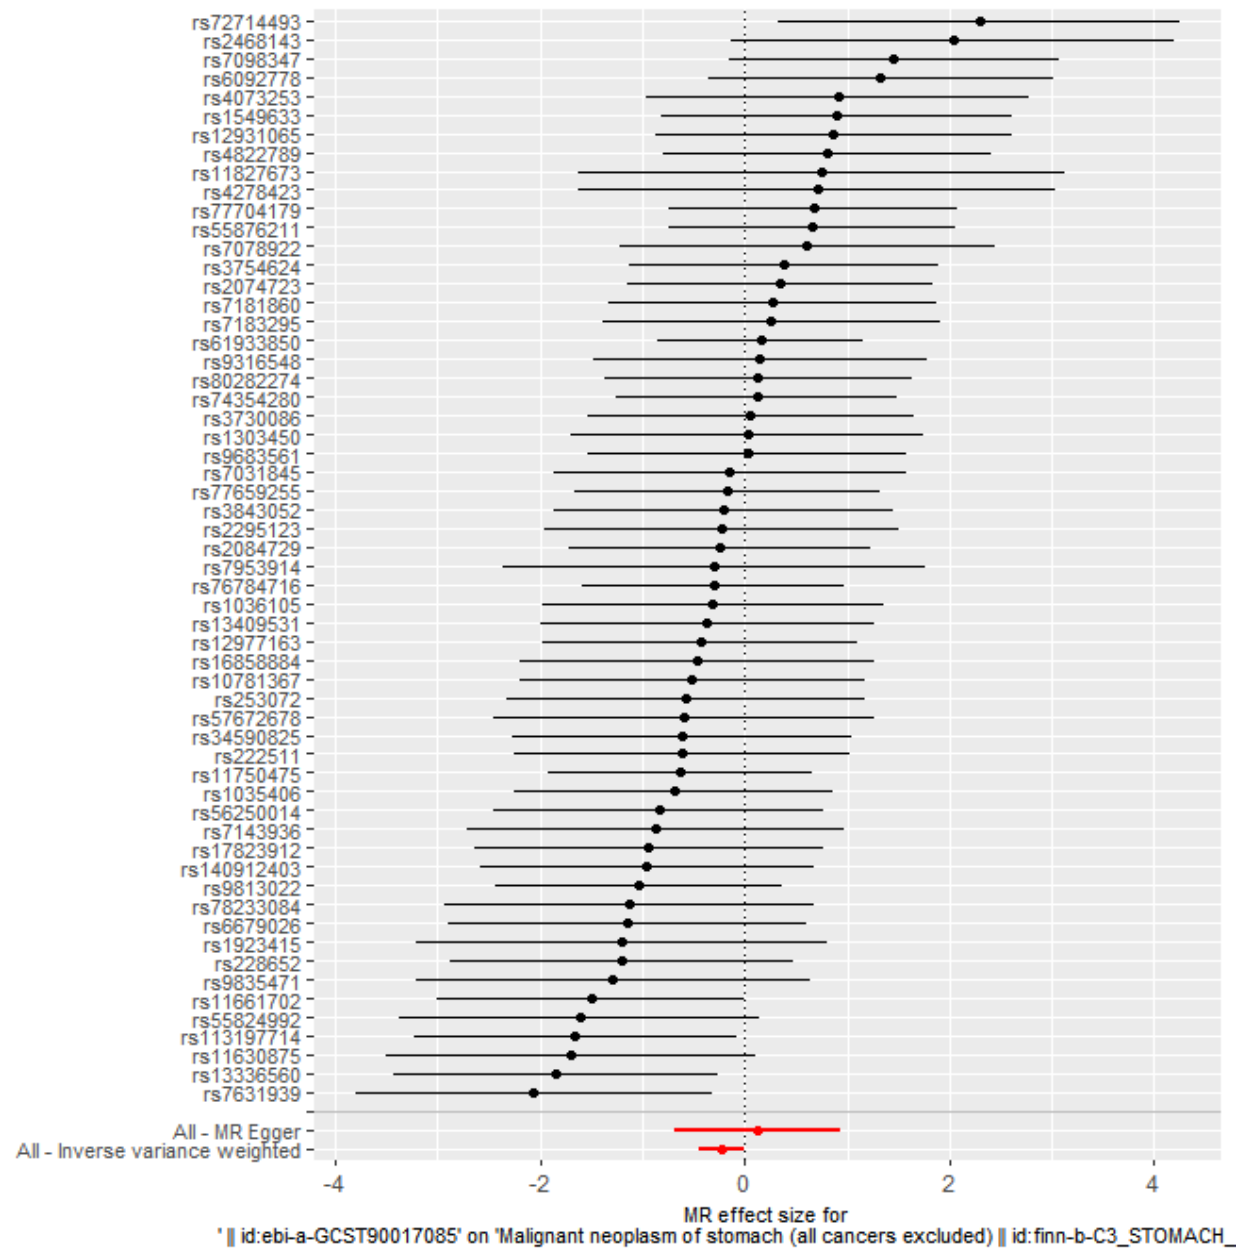

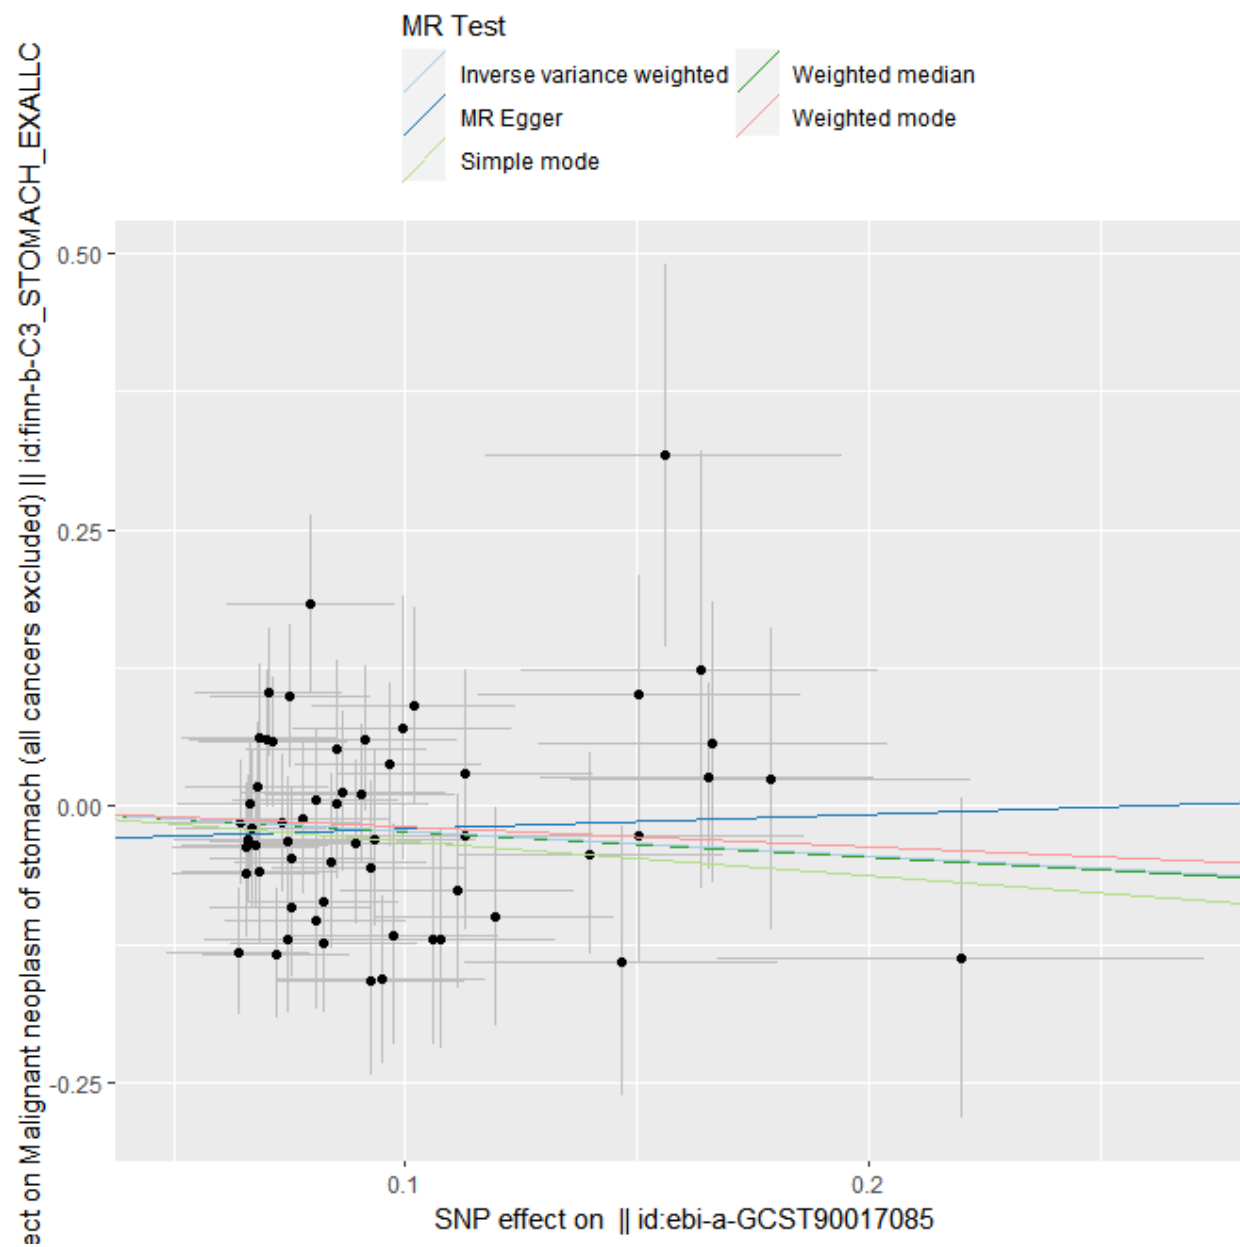



**Figure 95** Leave-one-out analysis, funnel plot, MR effect size and scatter plot for gut microbiota abundance (order Actinomycetales id.420) on gastric cancer

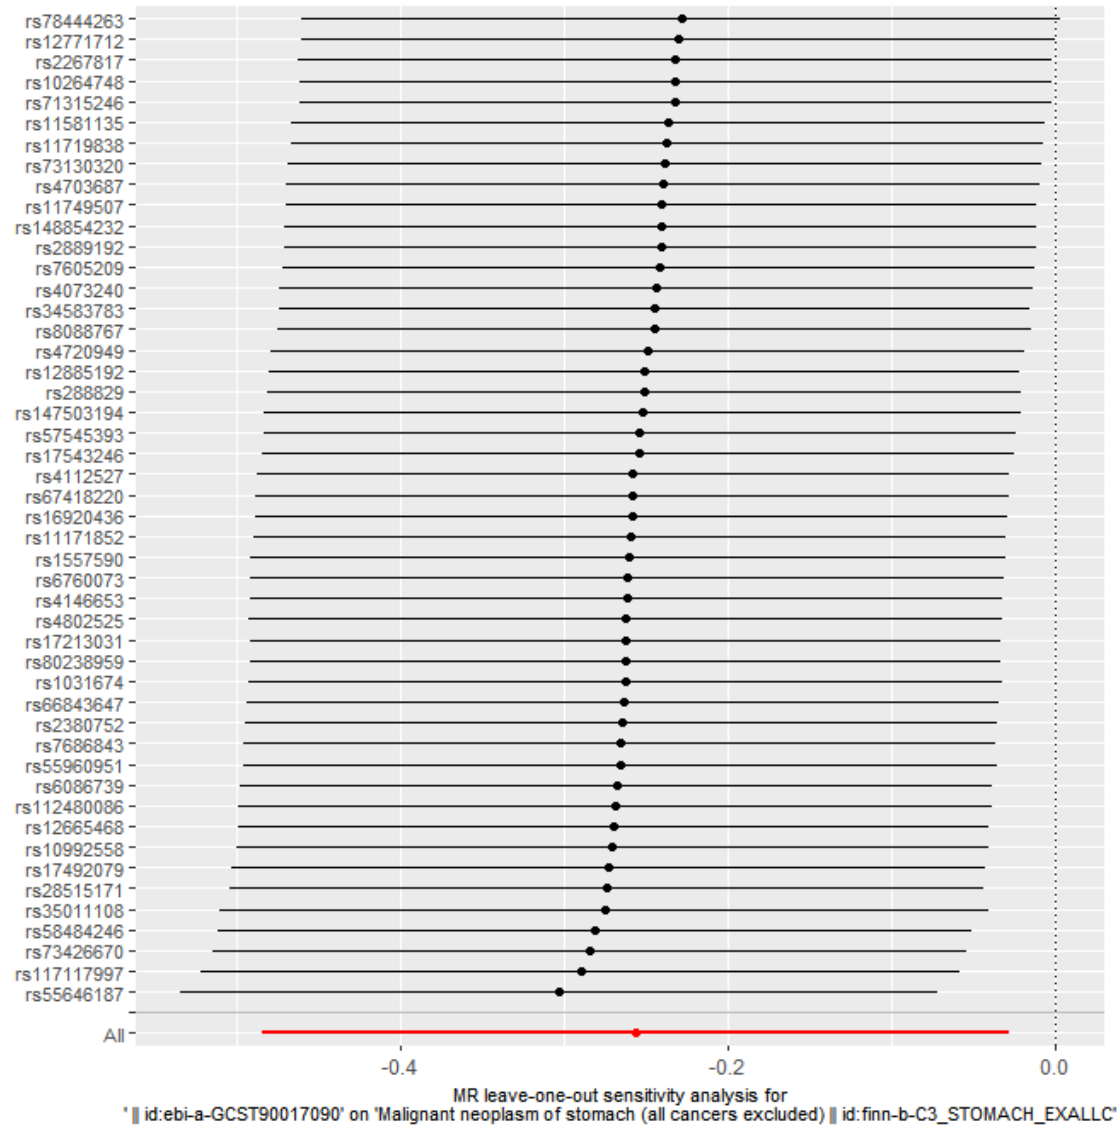

MR Method

- Inverse variance weighted
- MR Egger

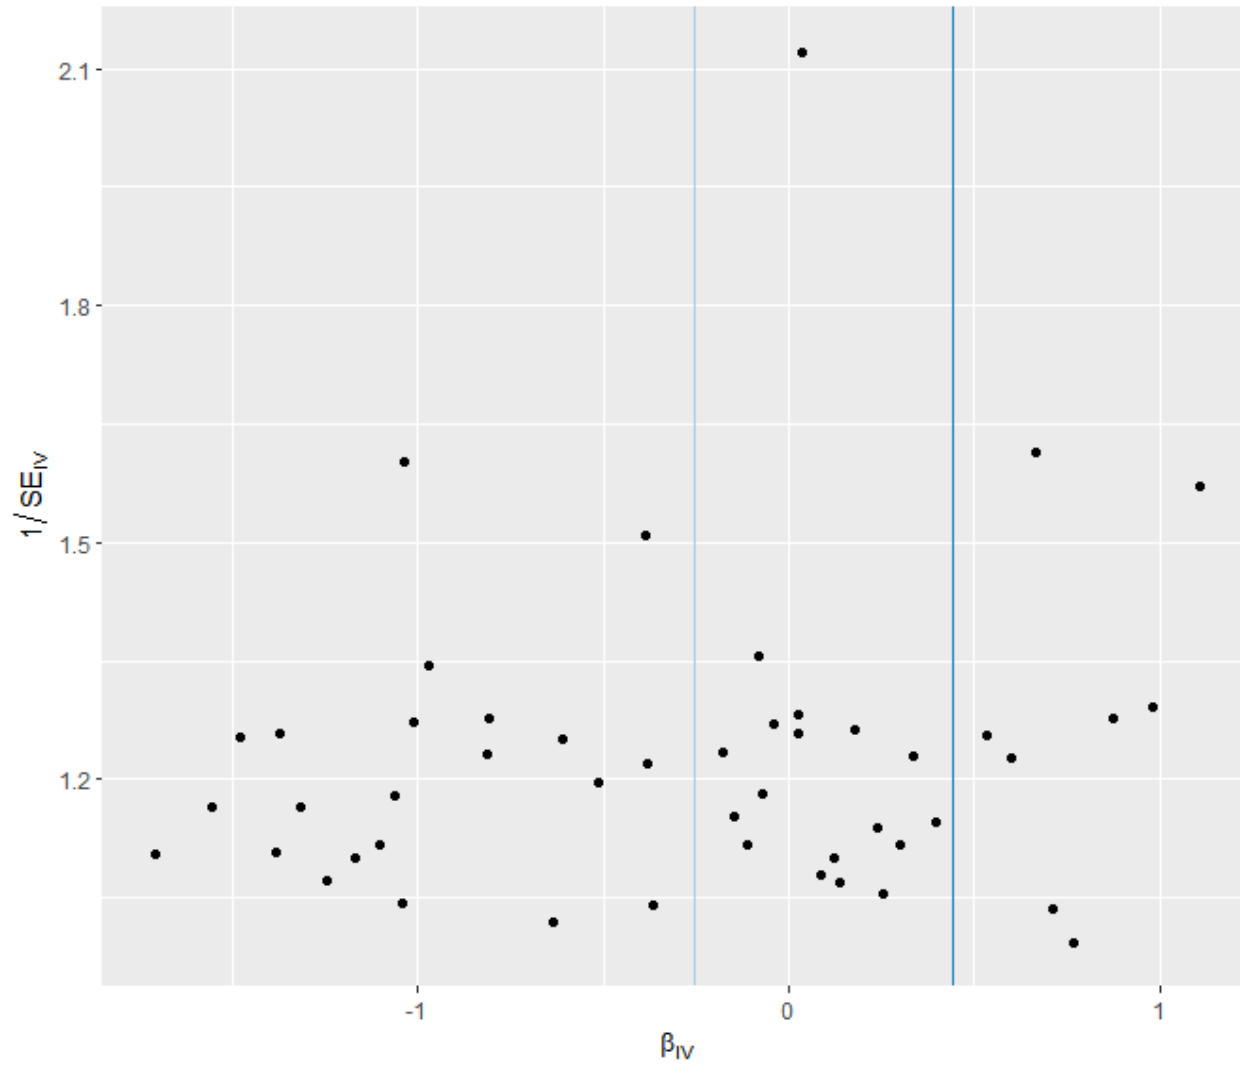

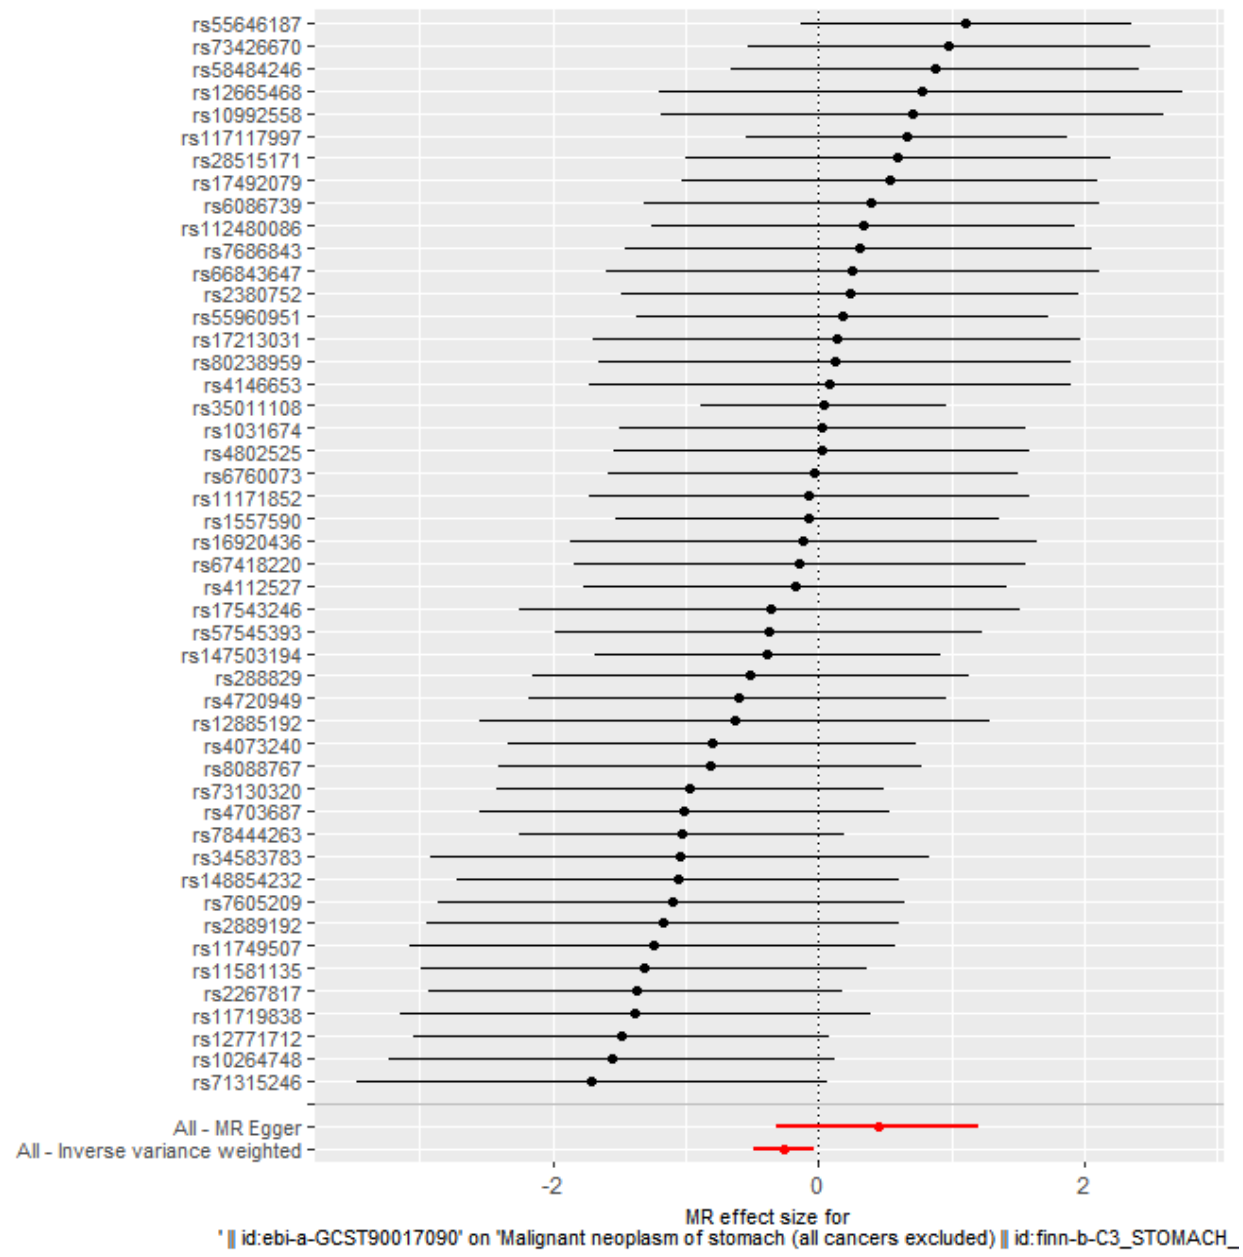

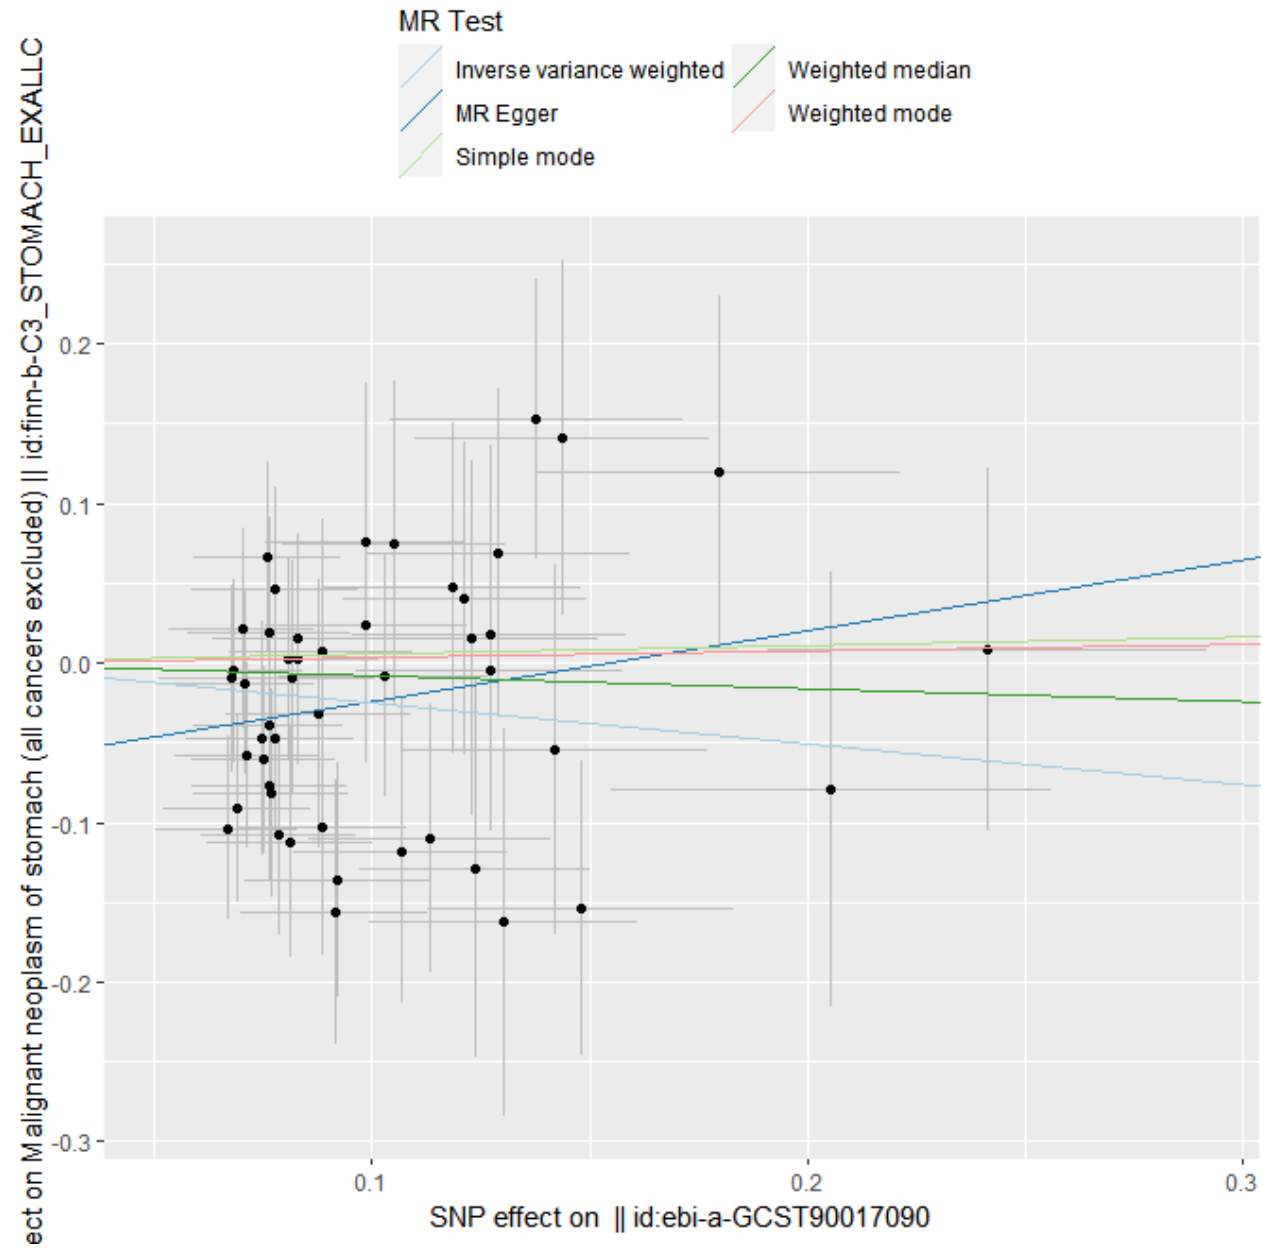

**Figure 96** Leave-one-out analysis, funnel plot, MR effect size and scatter plot for gut microbiota abundance (order Desulfovibrionales id.3156) on gastric cancer

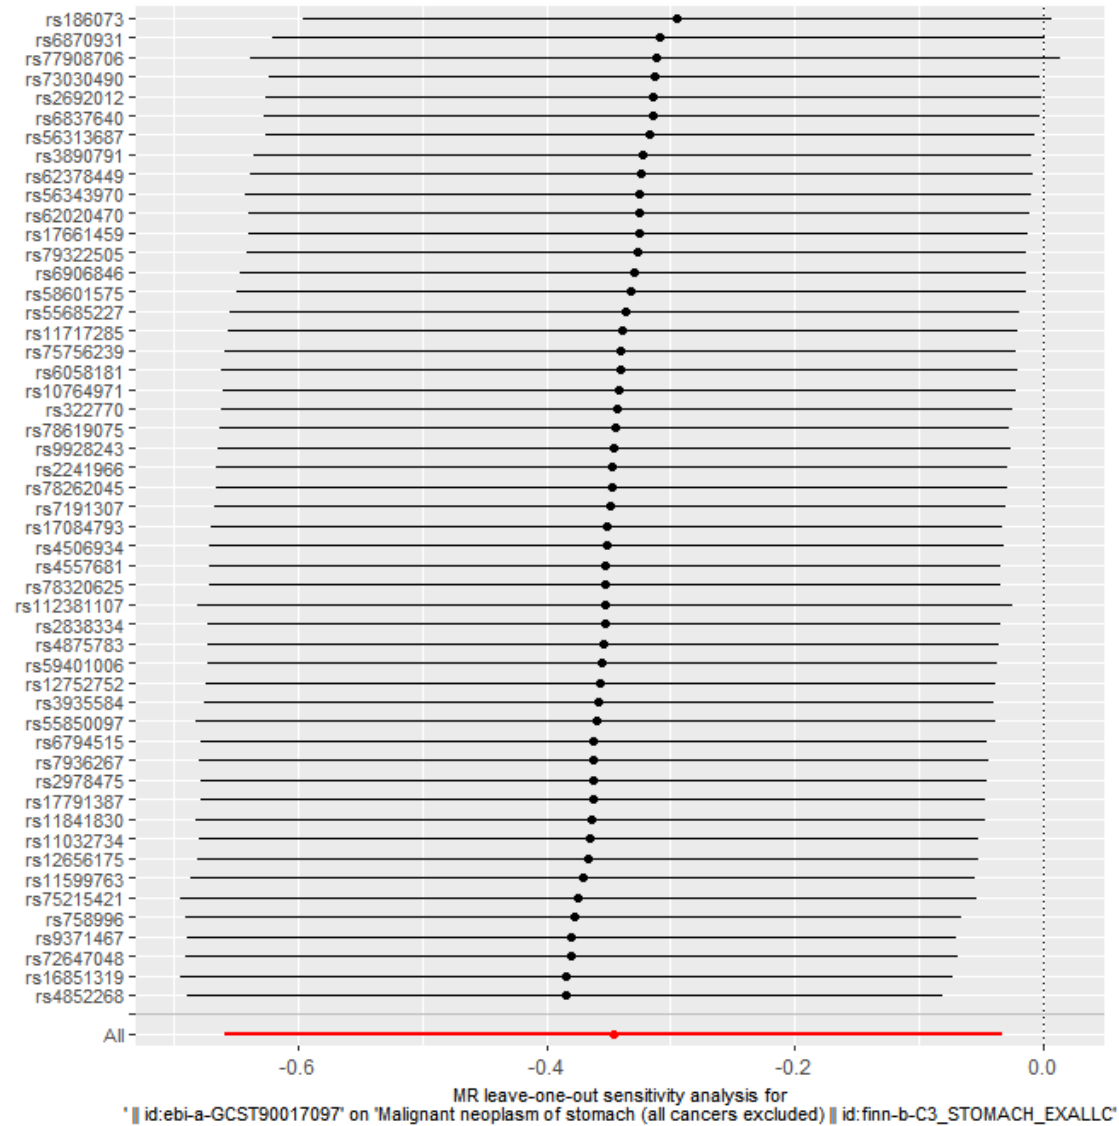

MR Method

- Inverse variance weighted
- MR Egger

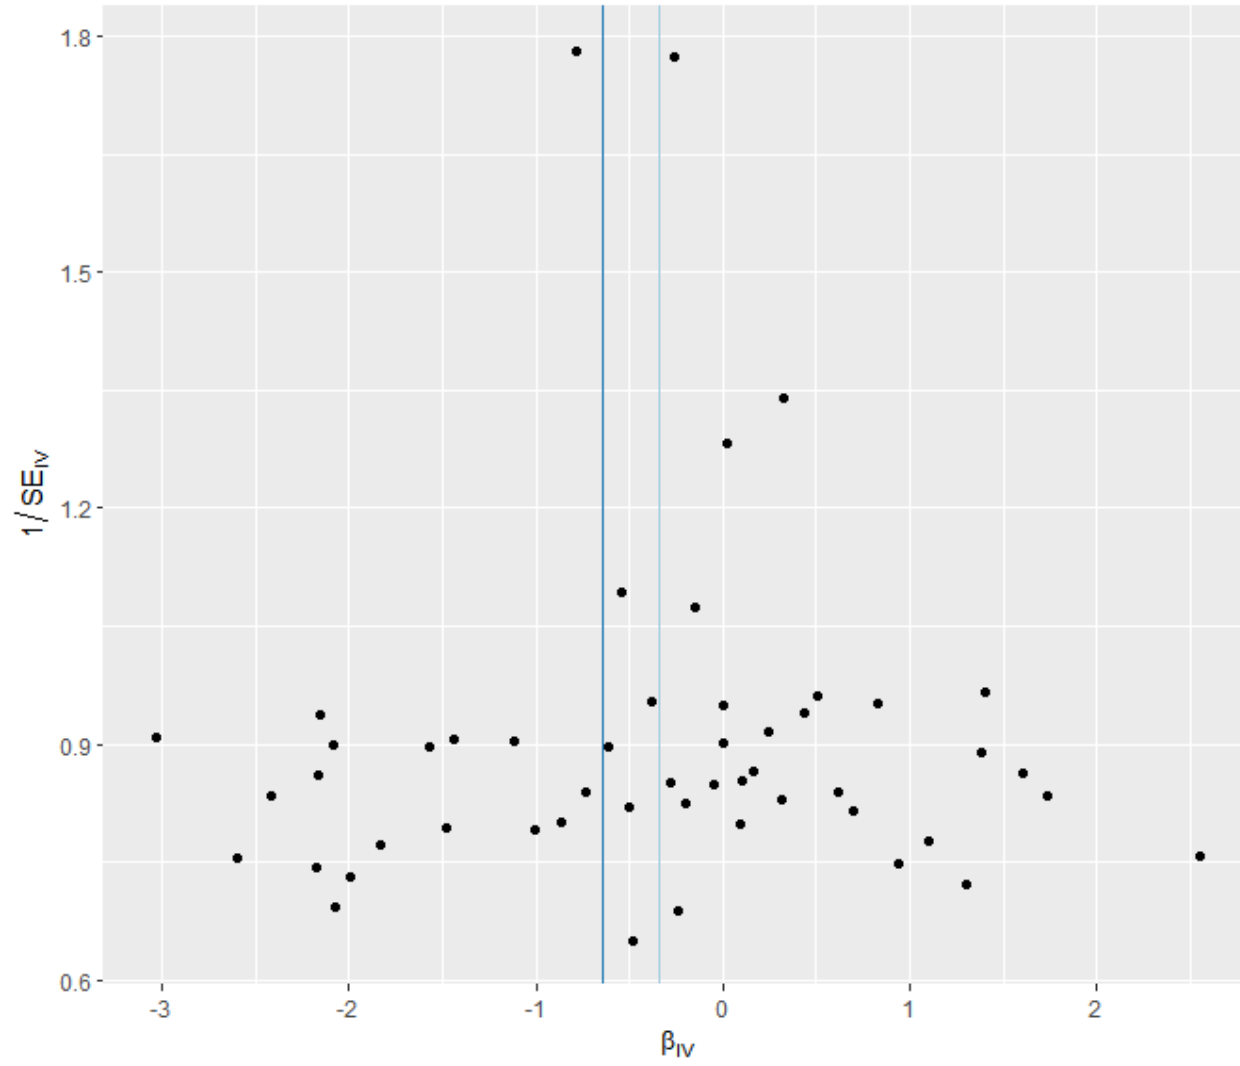

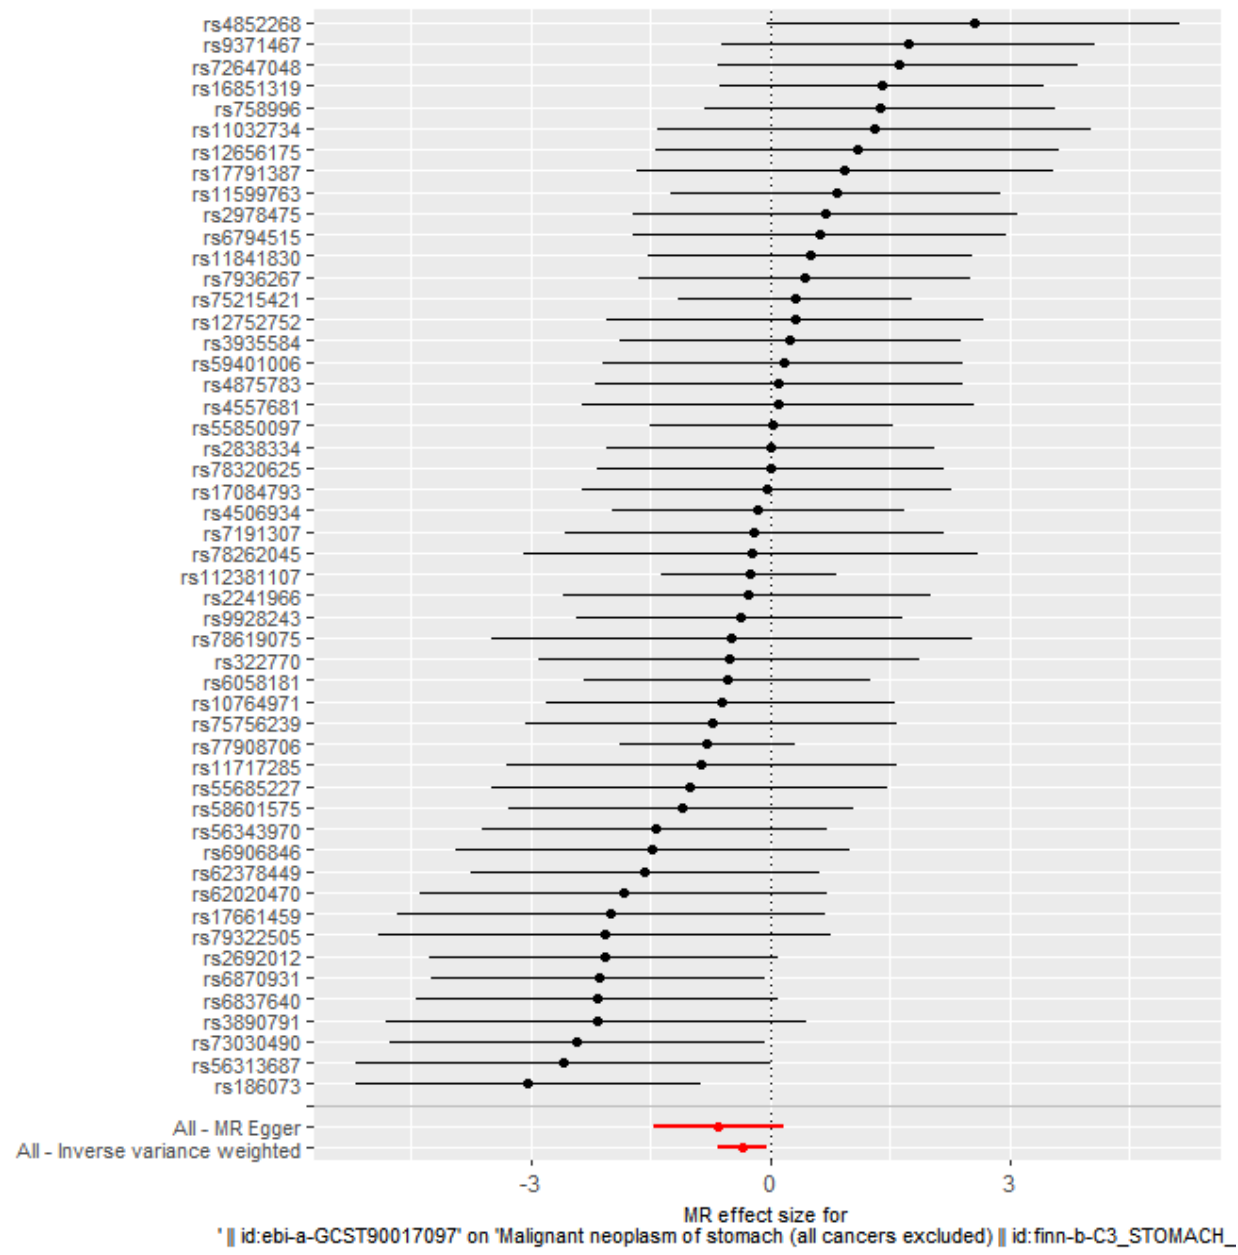

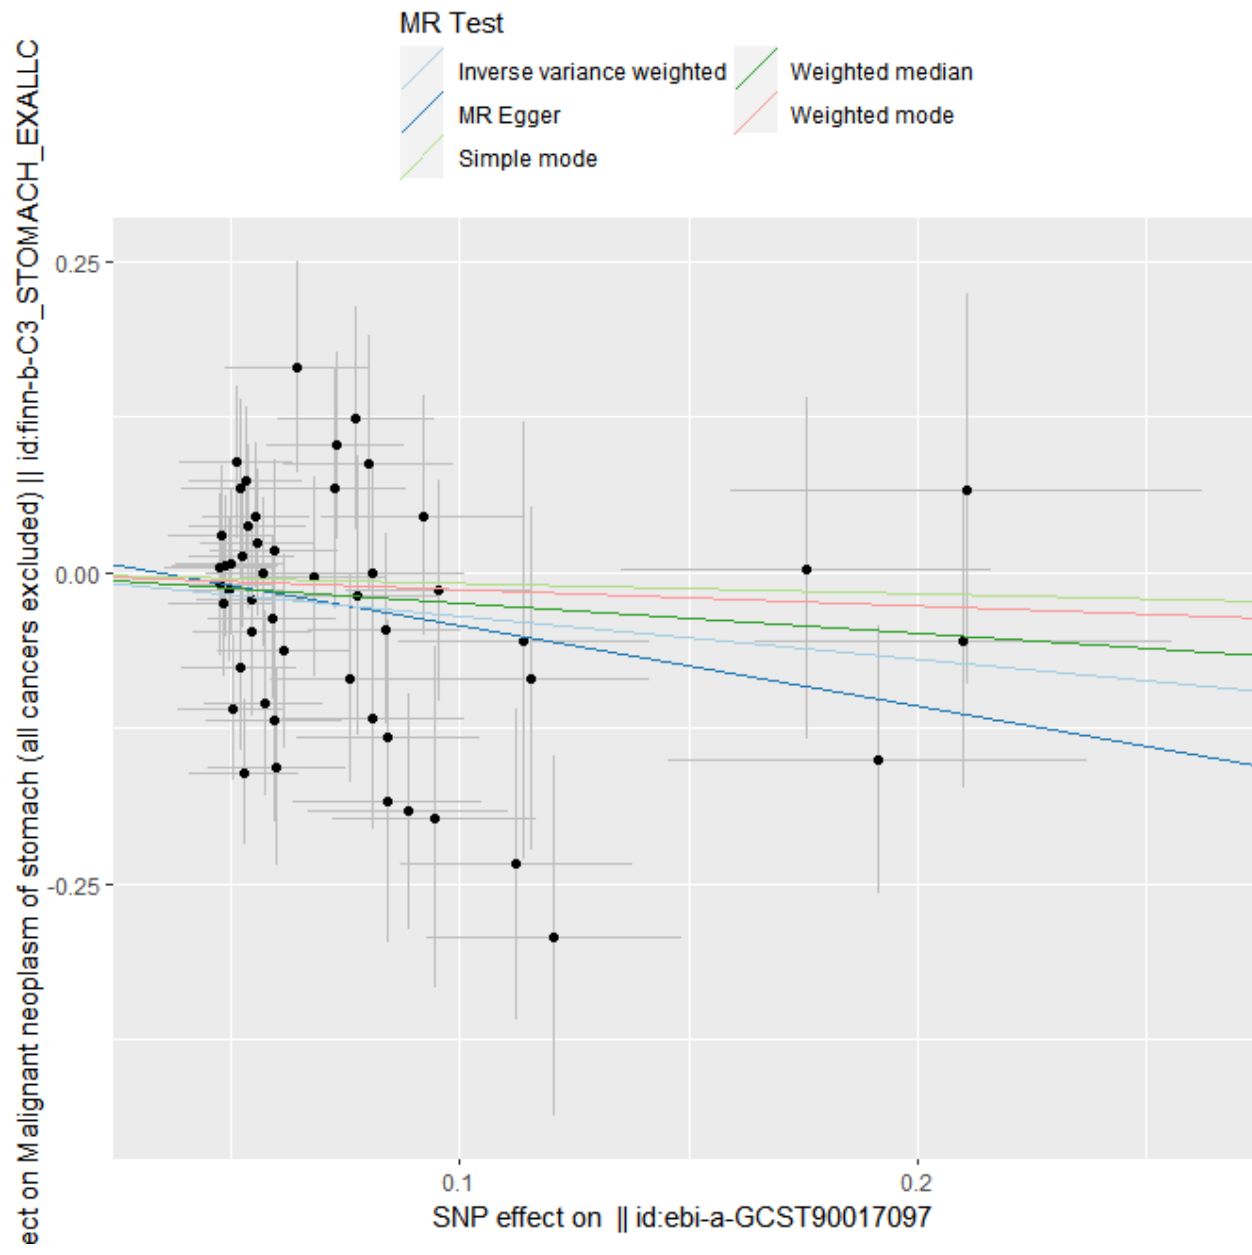



**Figure 97** Leave-one-out analysis, funnel plot, MR effect size and scatter plot for gut microbiota abundance (order Mollicutes RF9 id.11579) on gastric cancer

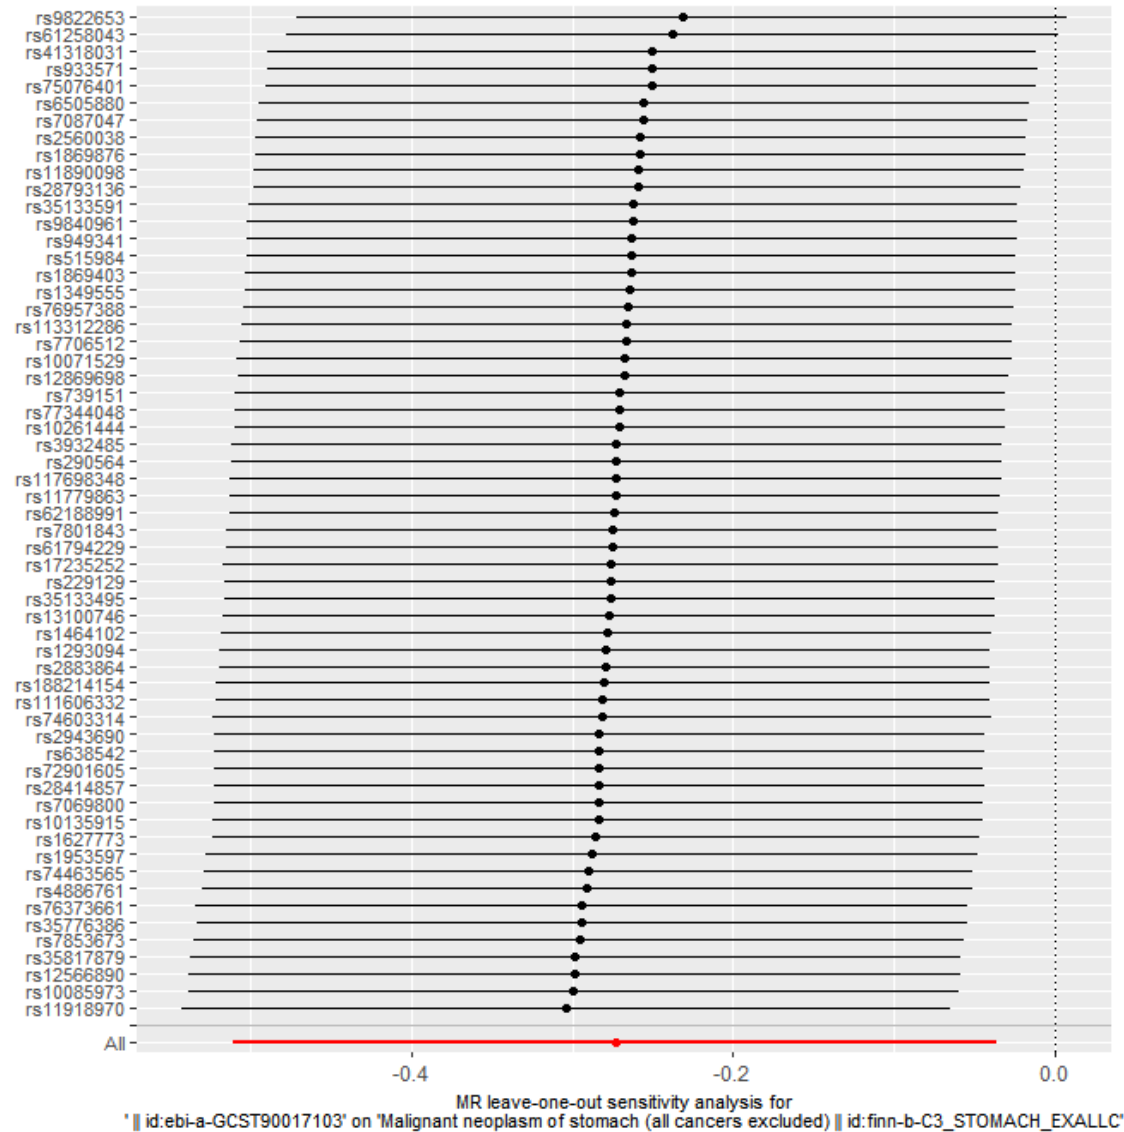

MR Method

- Inverse variance weighted
- MR Egger

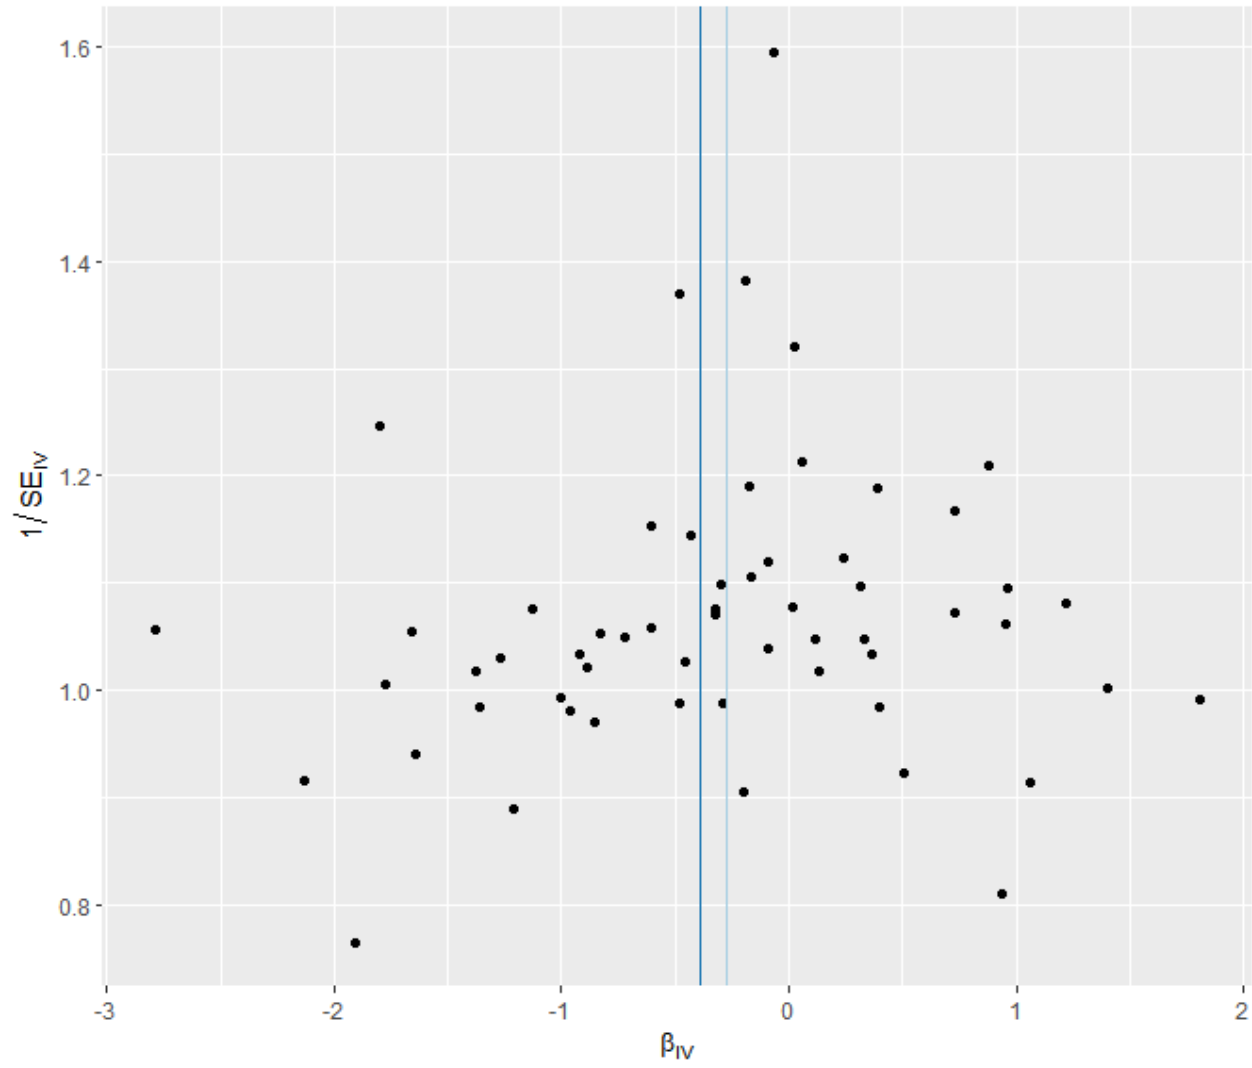

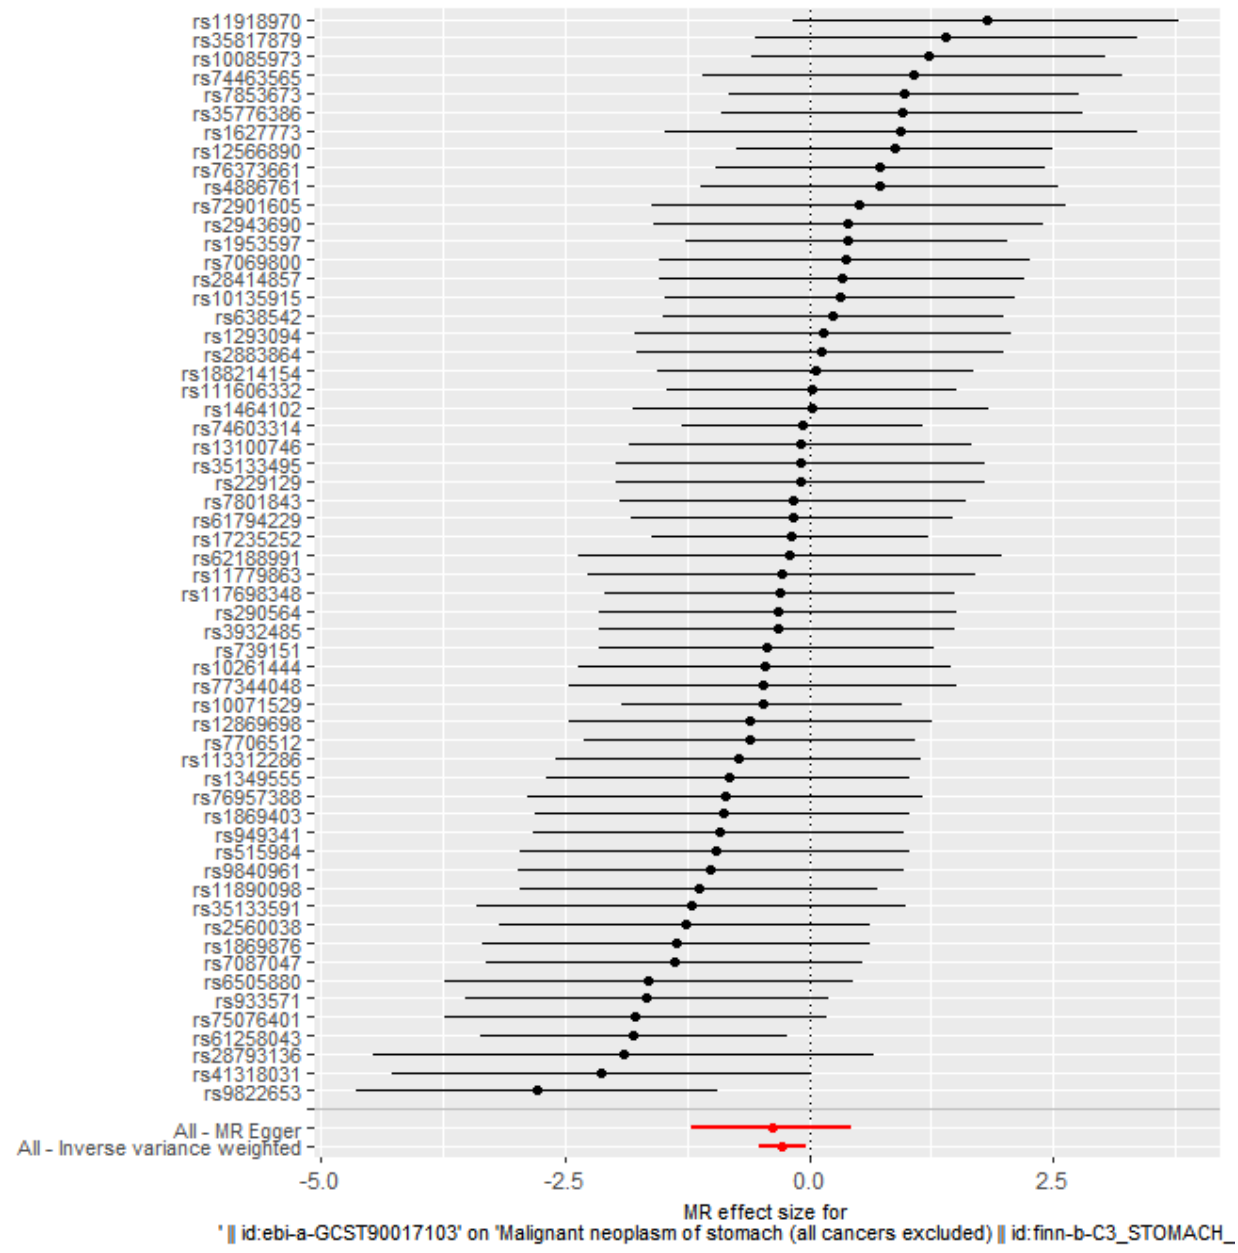

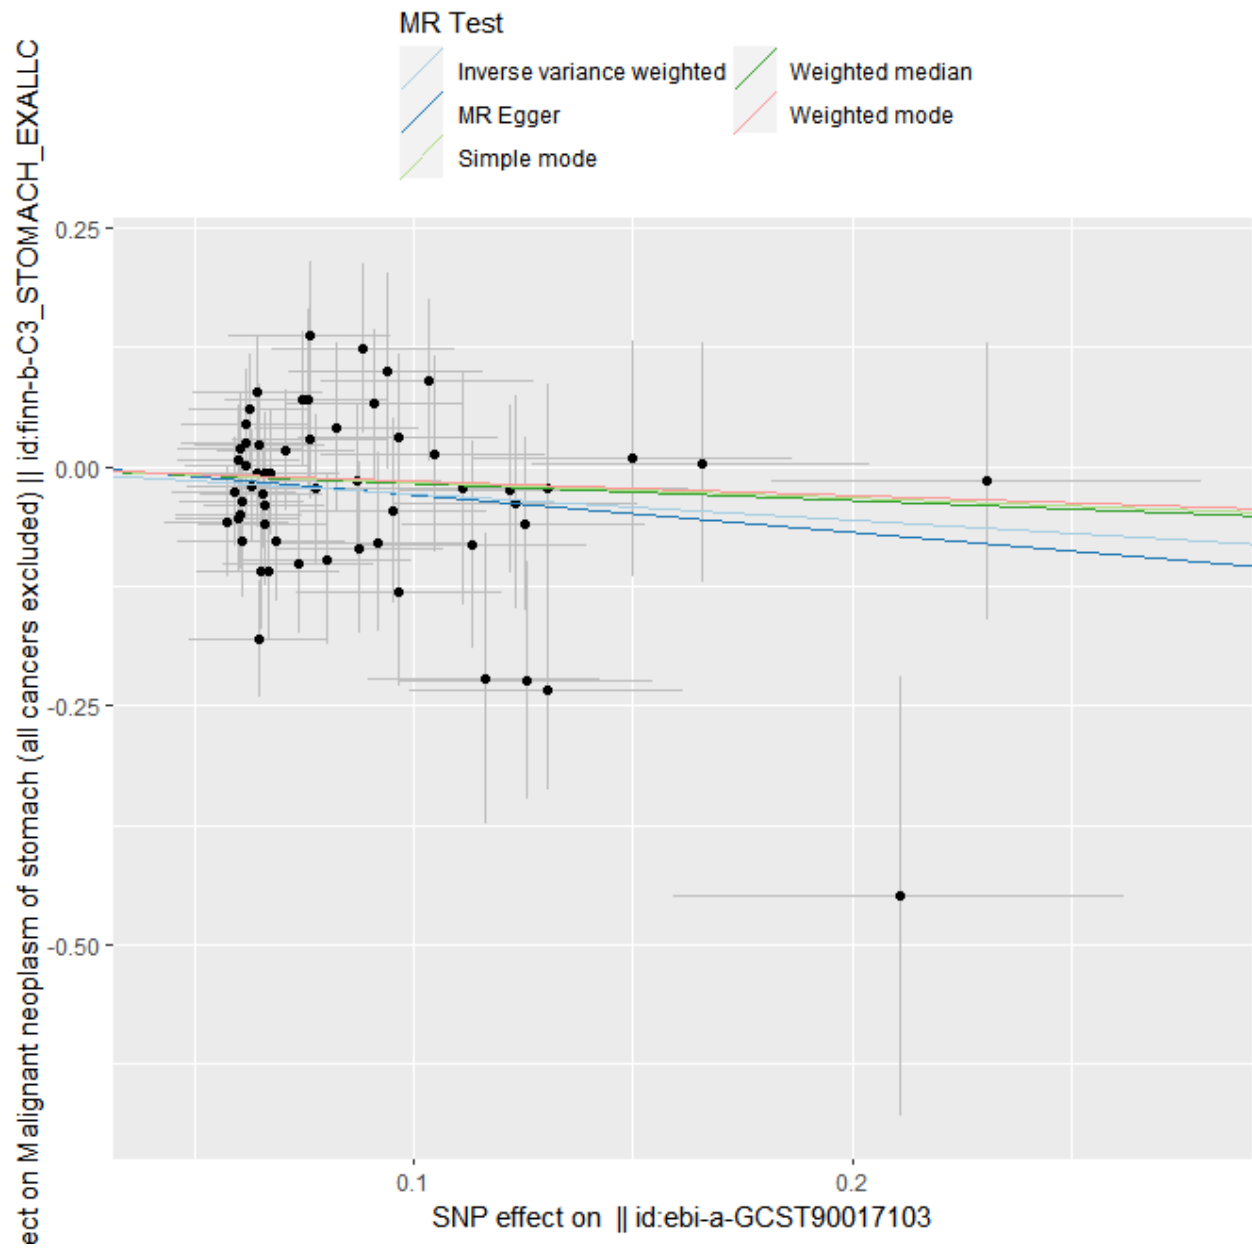

**Figure 98** Leave-one-out analysis, funnel plot, MR effect size and scatter plot for gut microbiota abundance (genus *Anaerofilum* id.2053) on irritable bowel syndrome

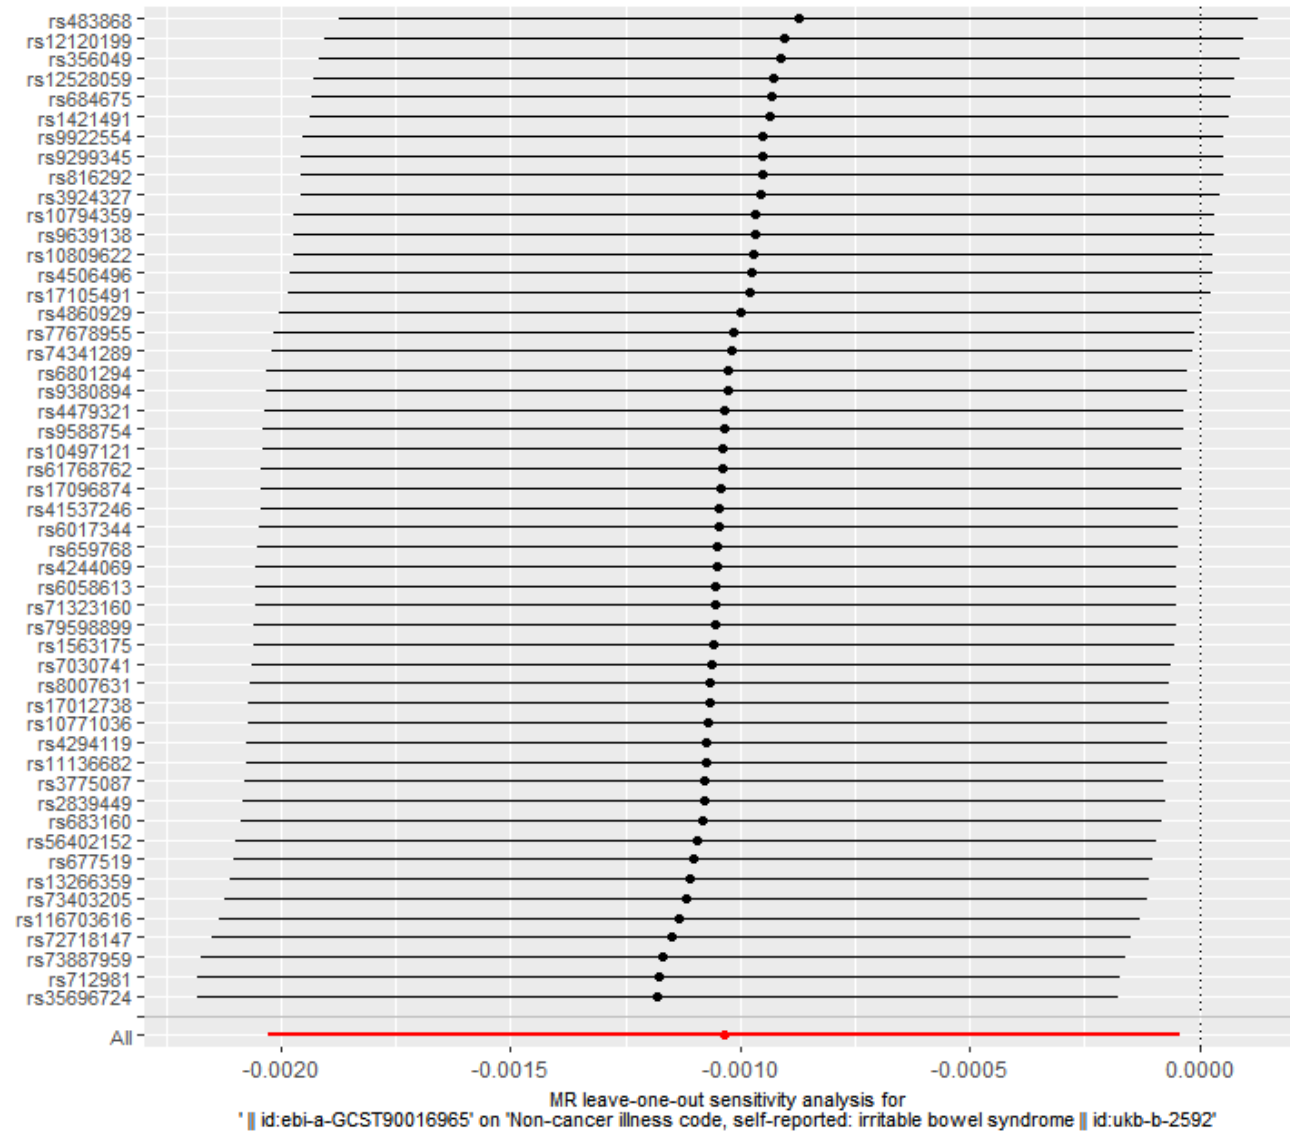

MR Method

- Inverse variance weighted
- MR Egger

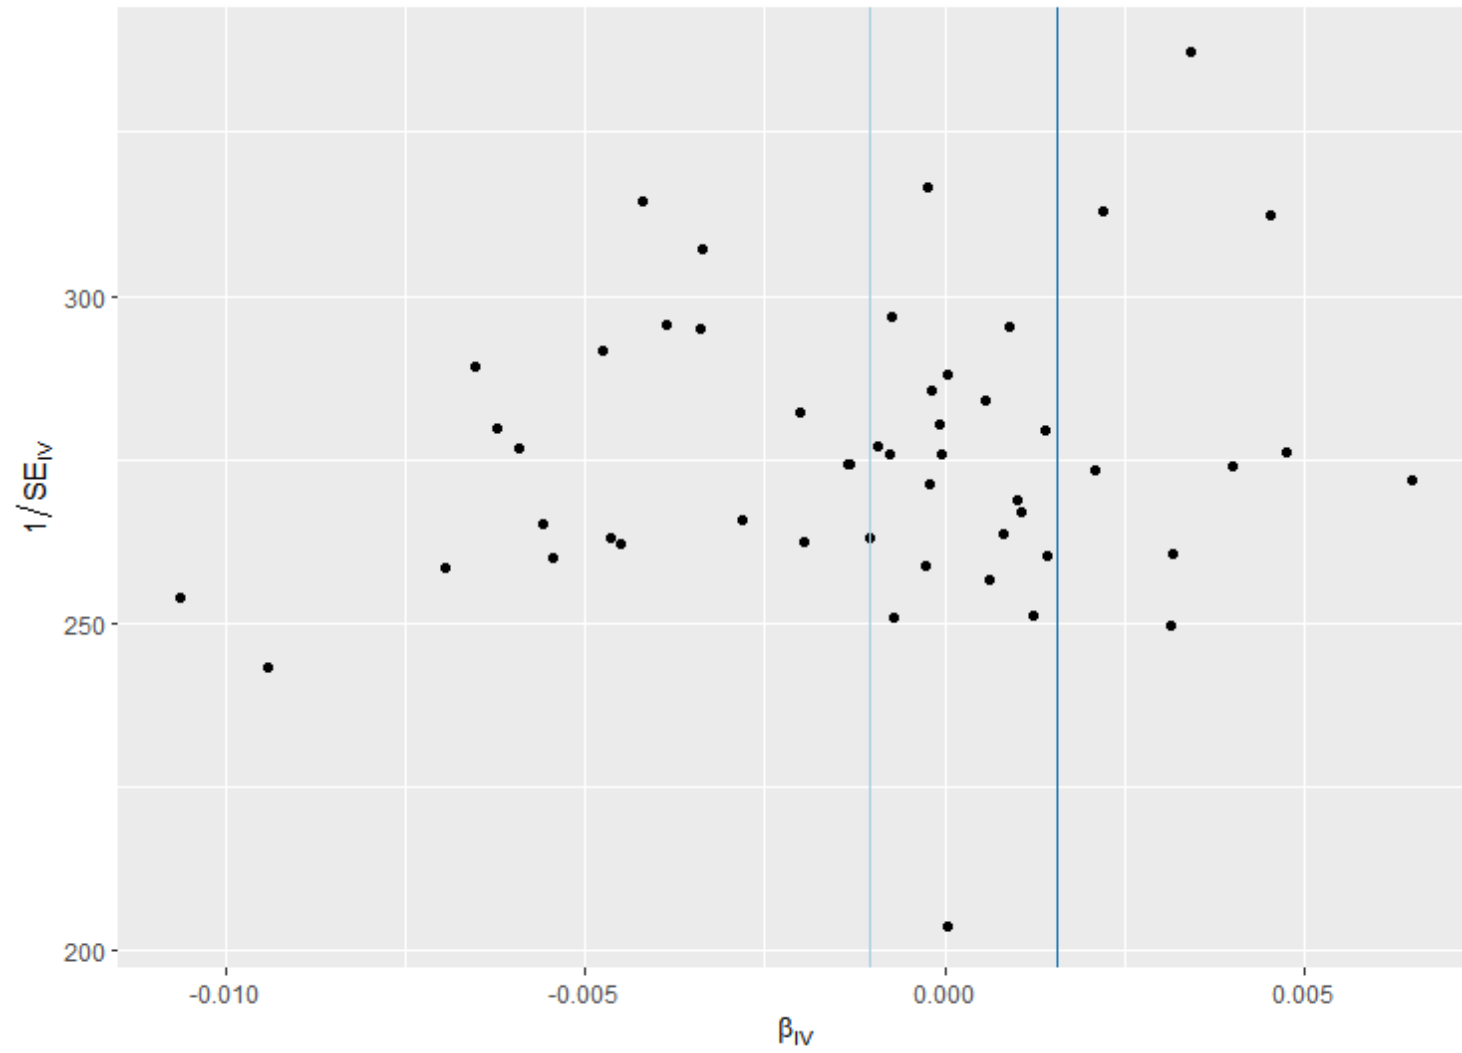

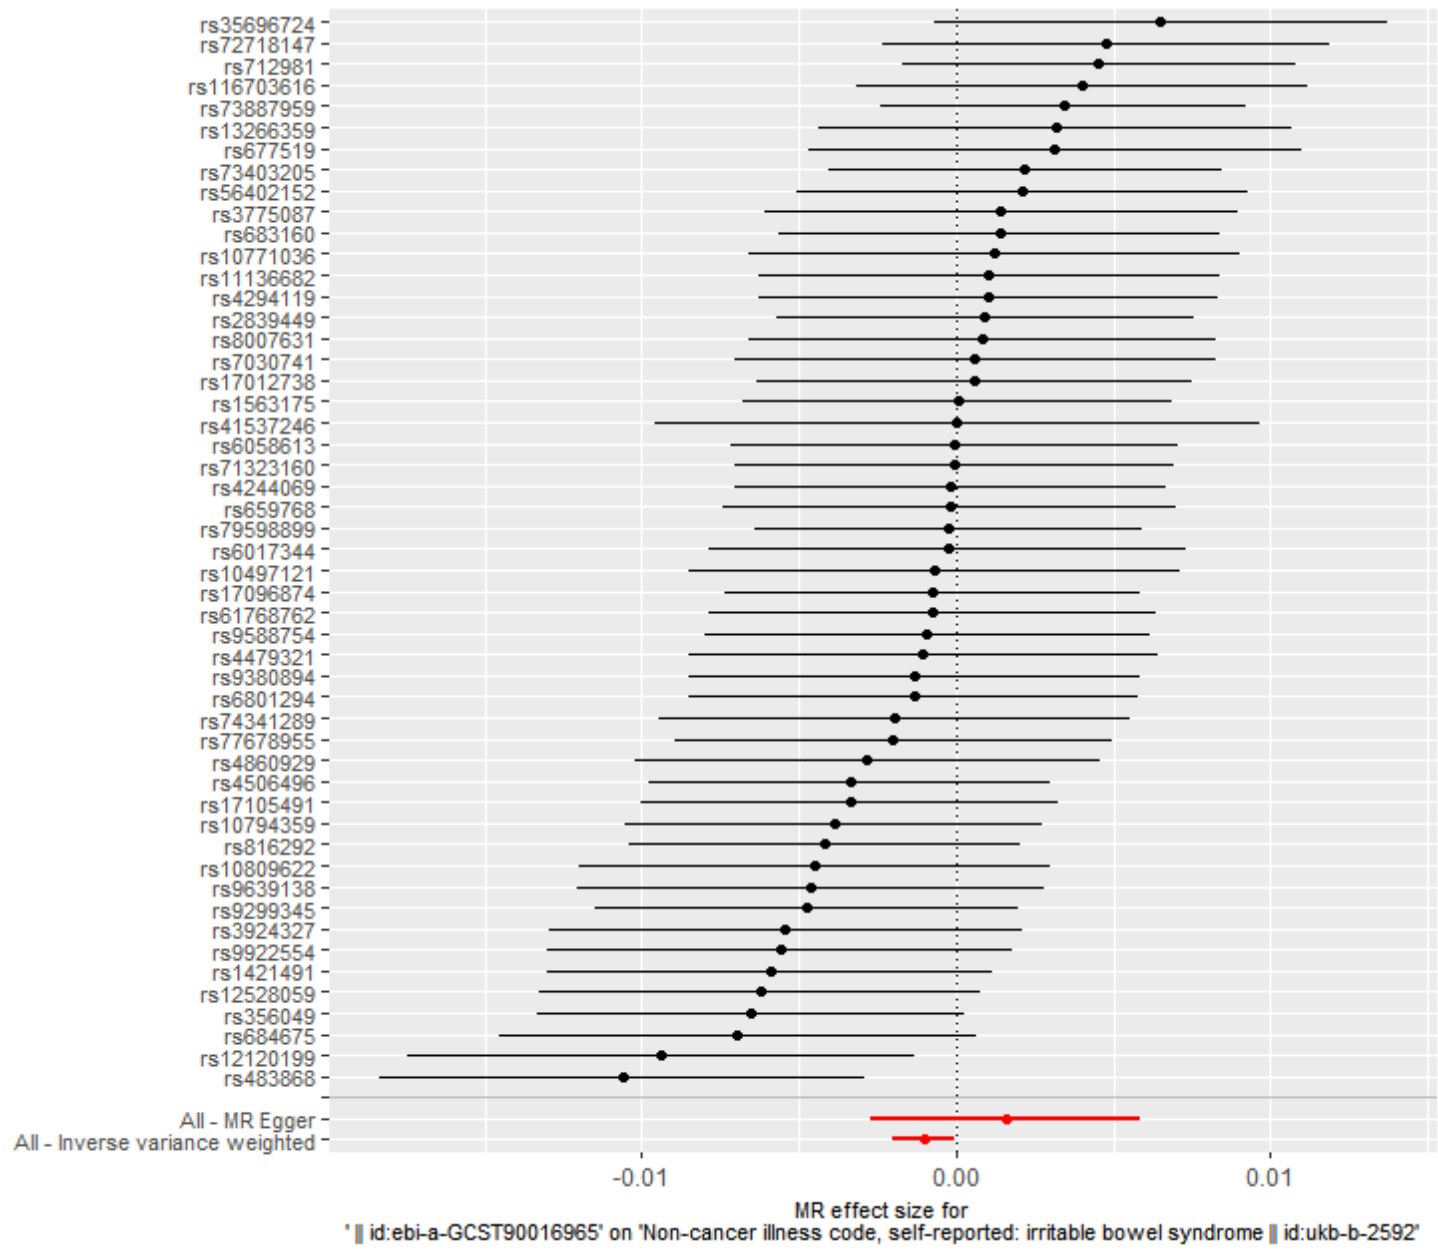

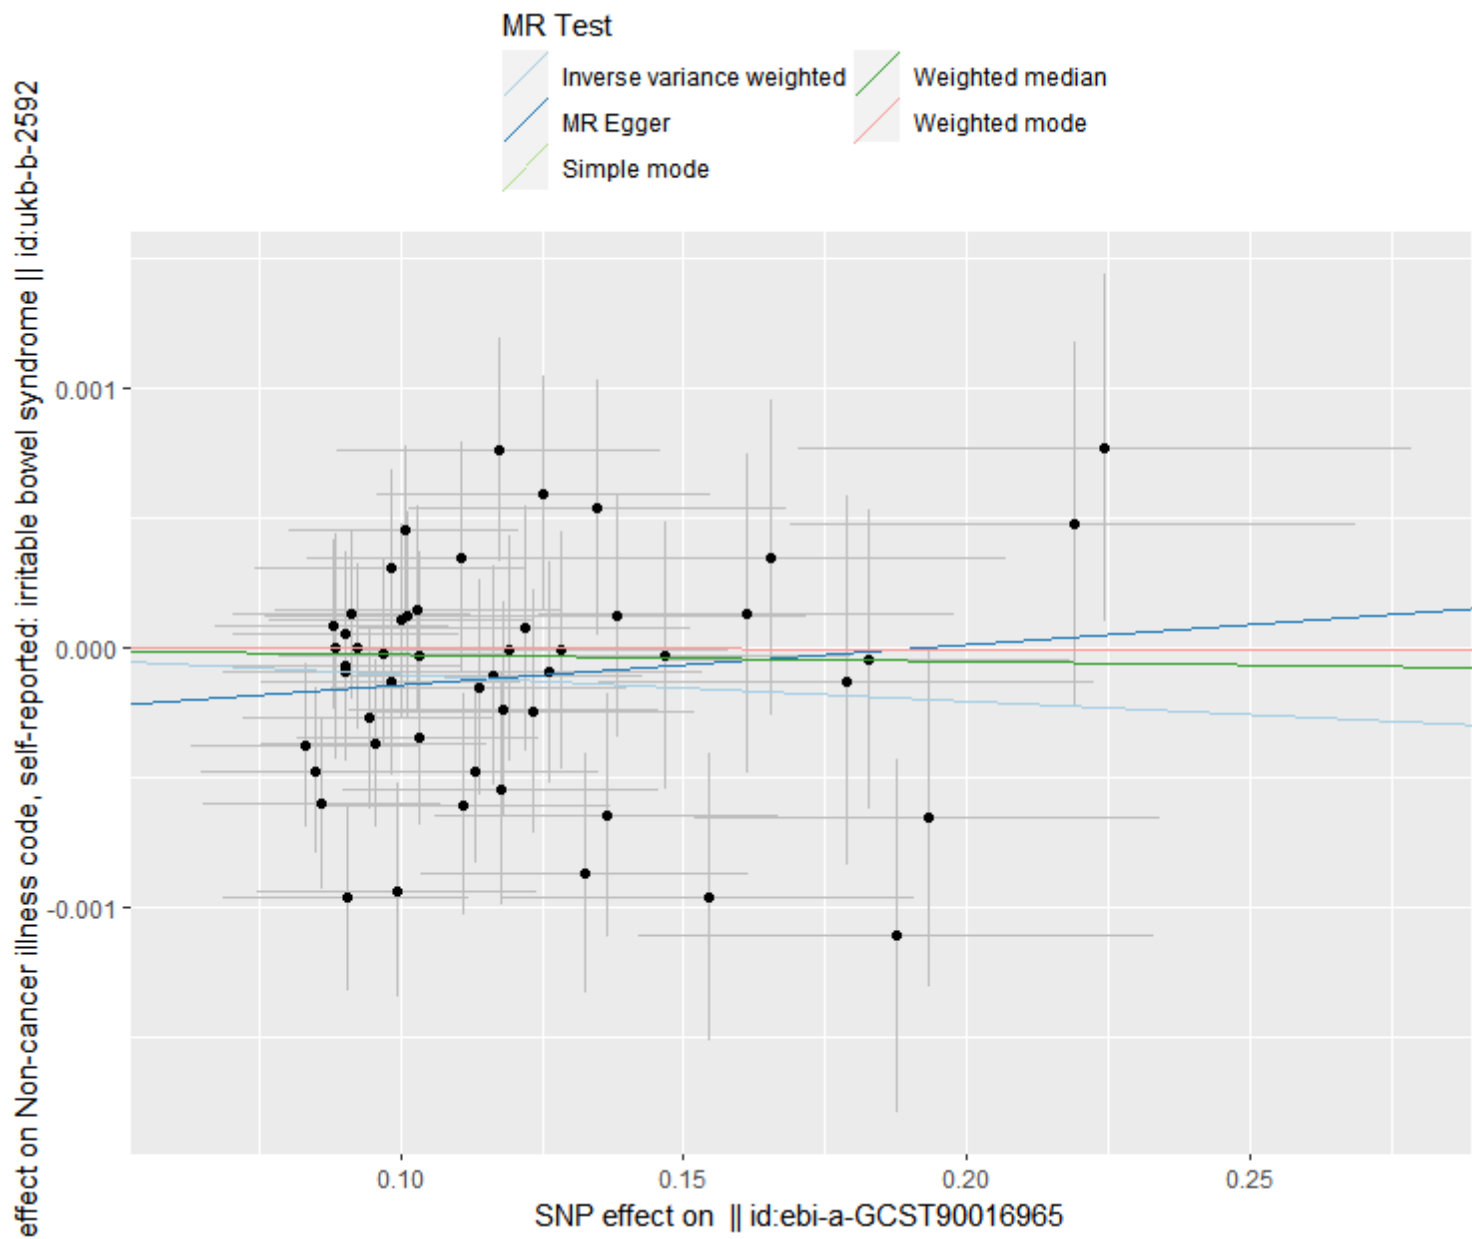



**Figure 99** Leave-one-out analysis, funnel plot, MR effect size and scatter plot for gut microbiota abundance (genus *Desulfovibrio* id.3173) on irritable bowel syndrome

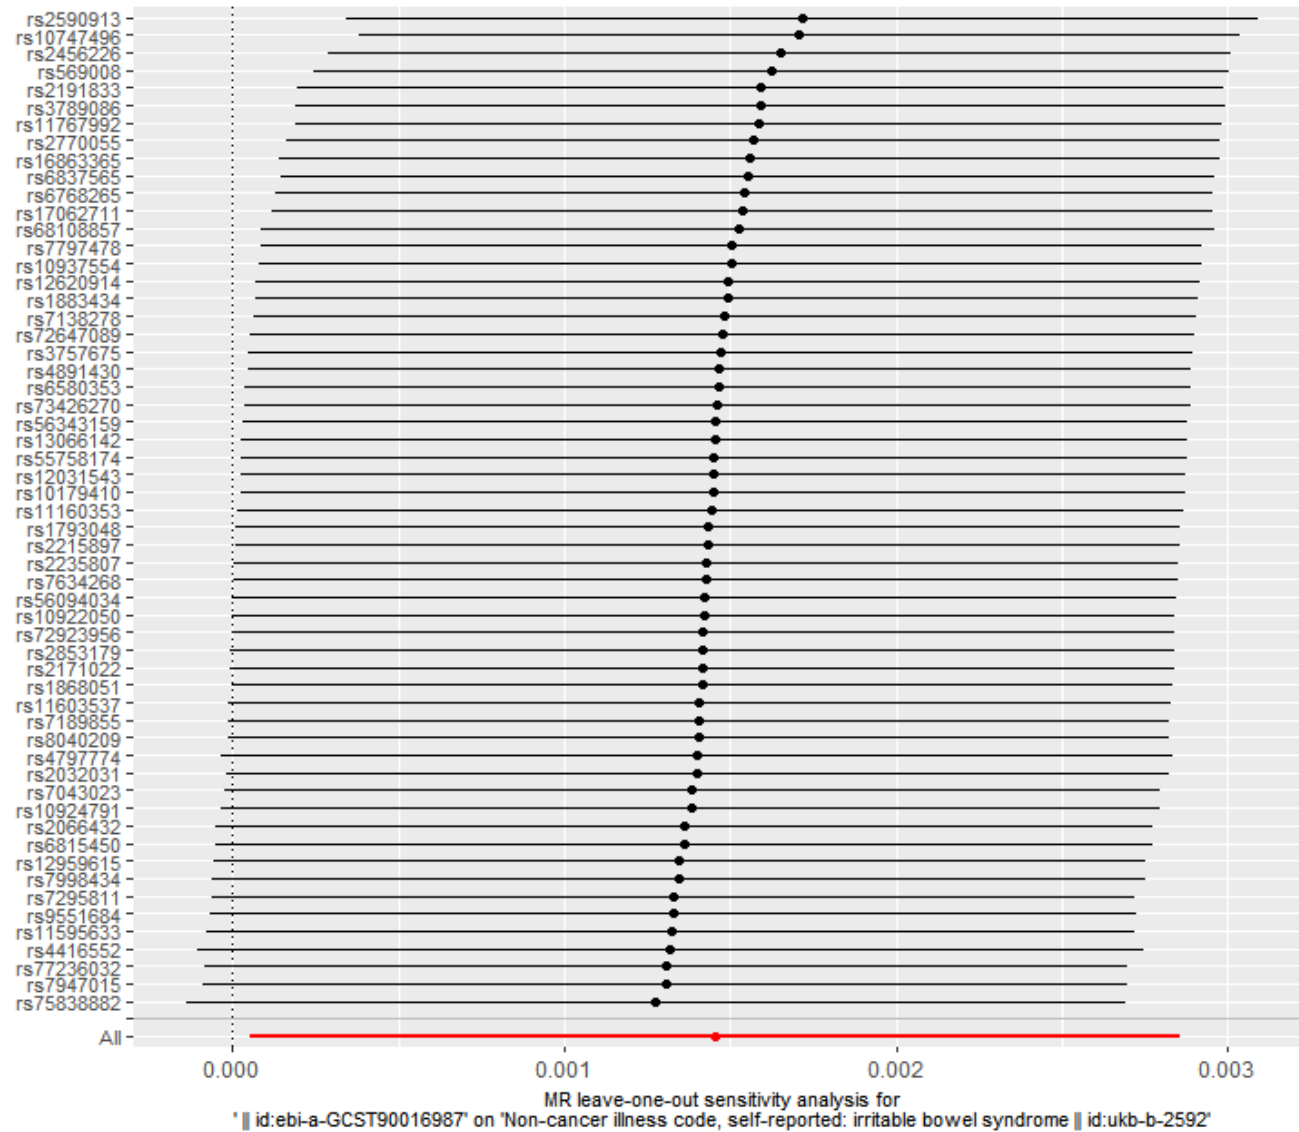

MR Method

- Inverse variance weighted
- MR Egger

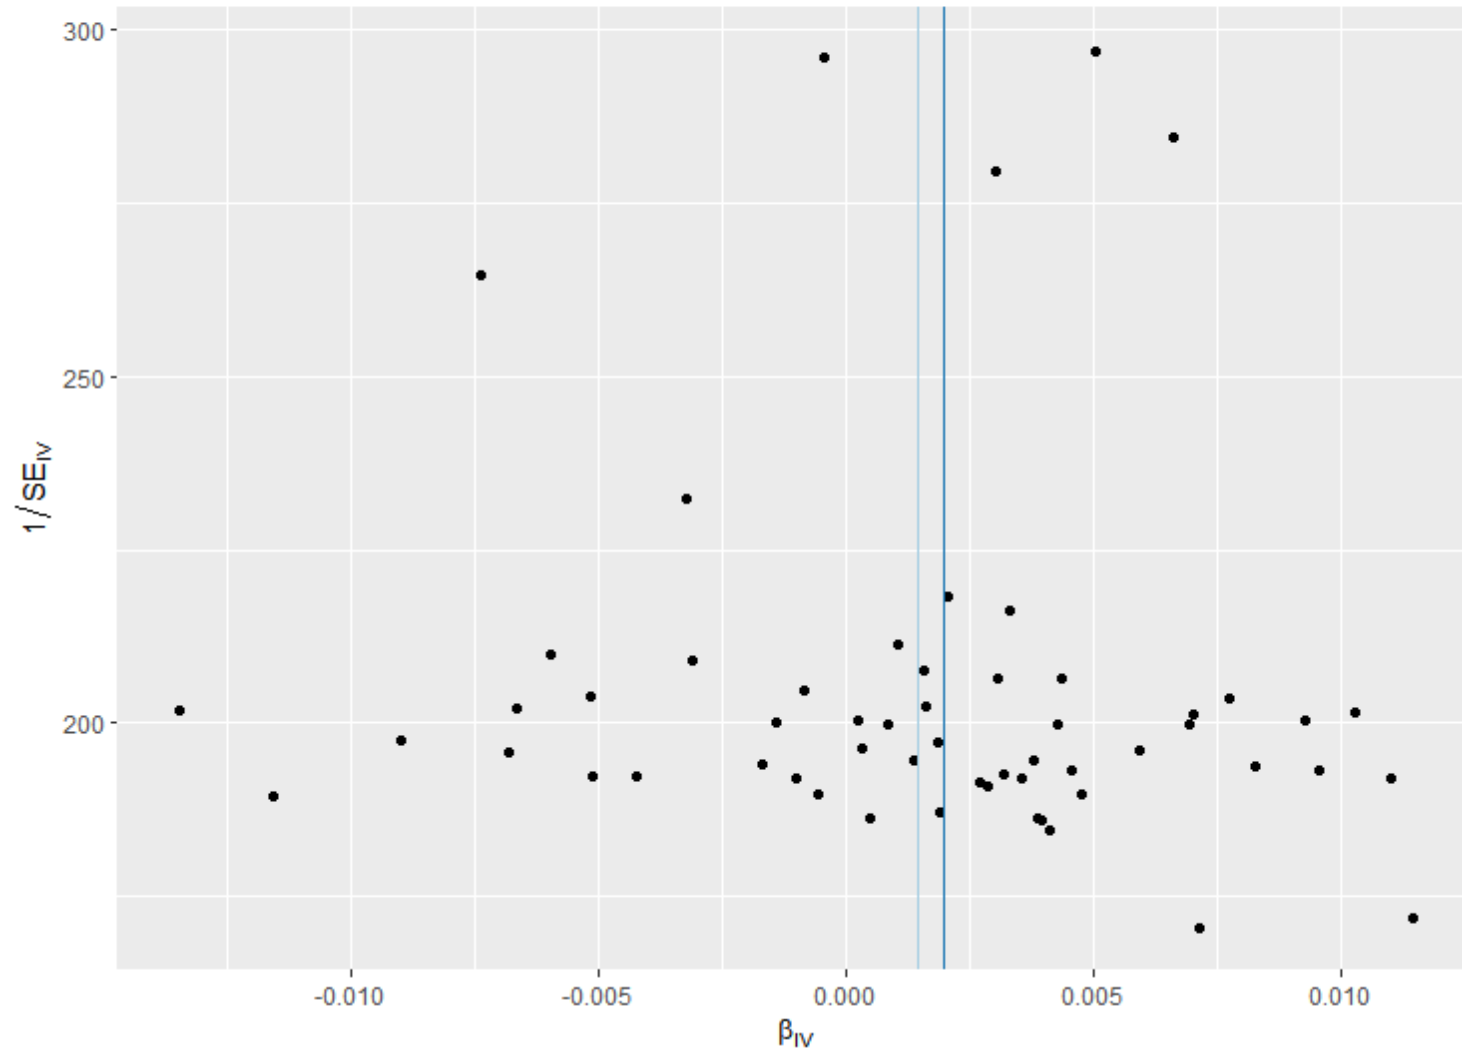

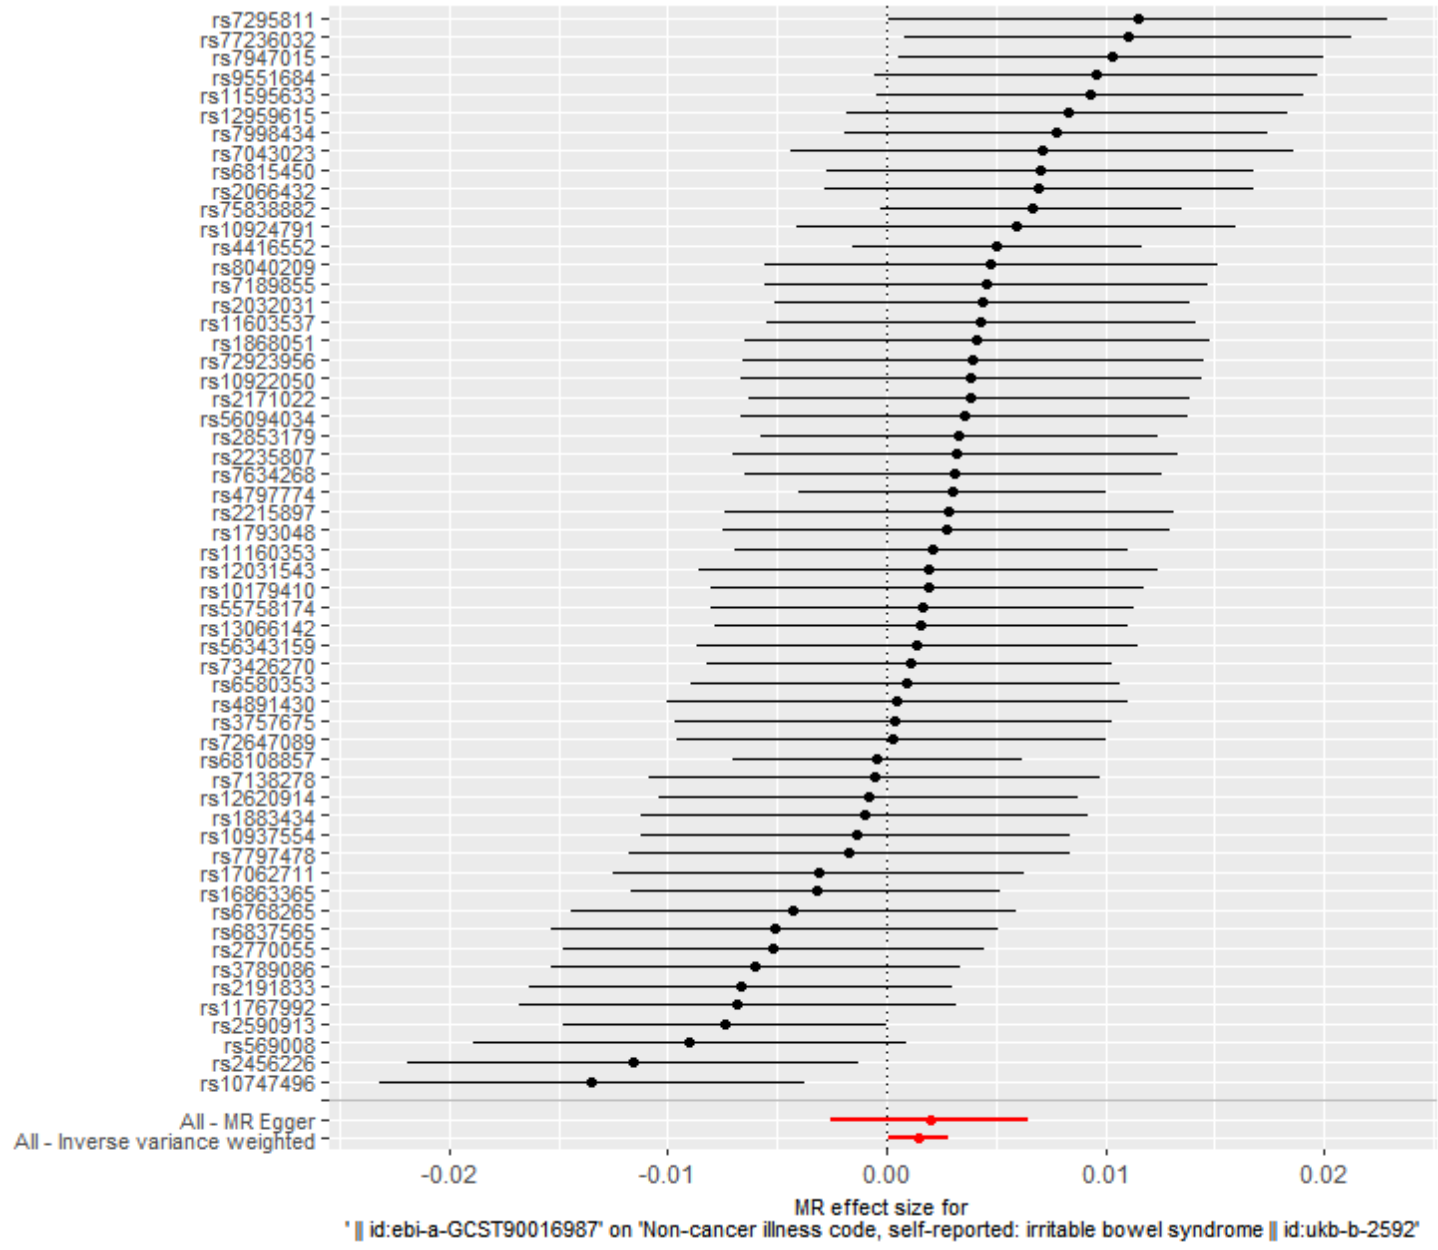

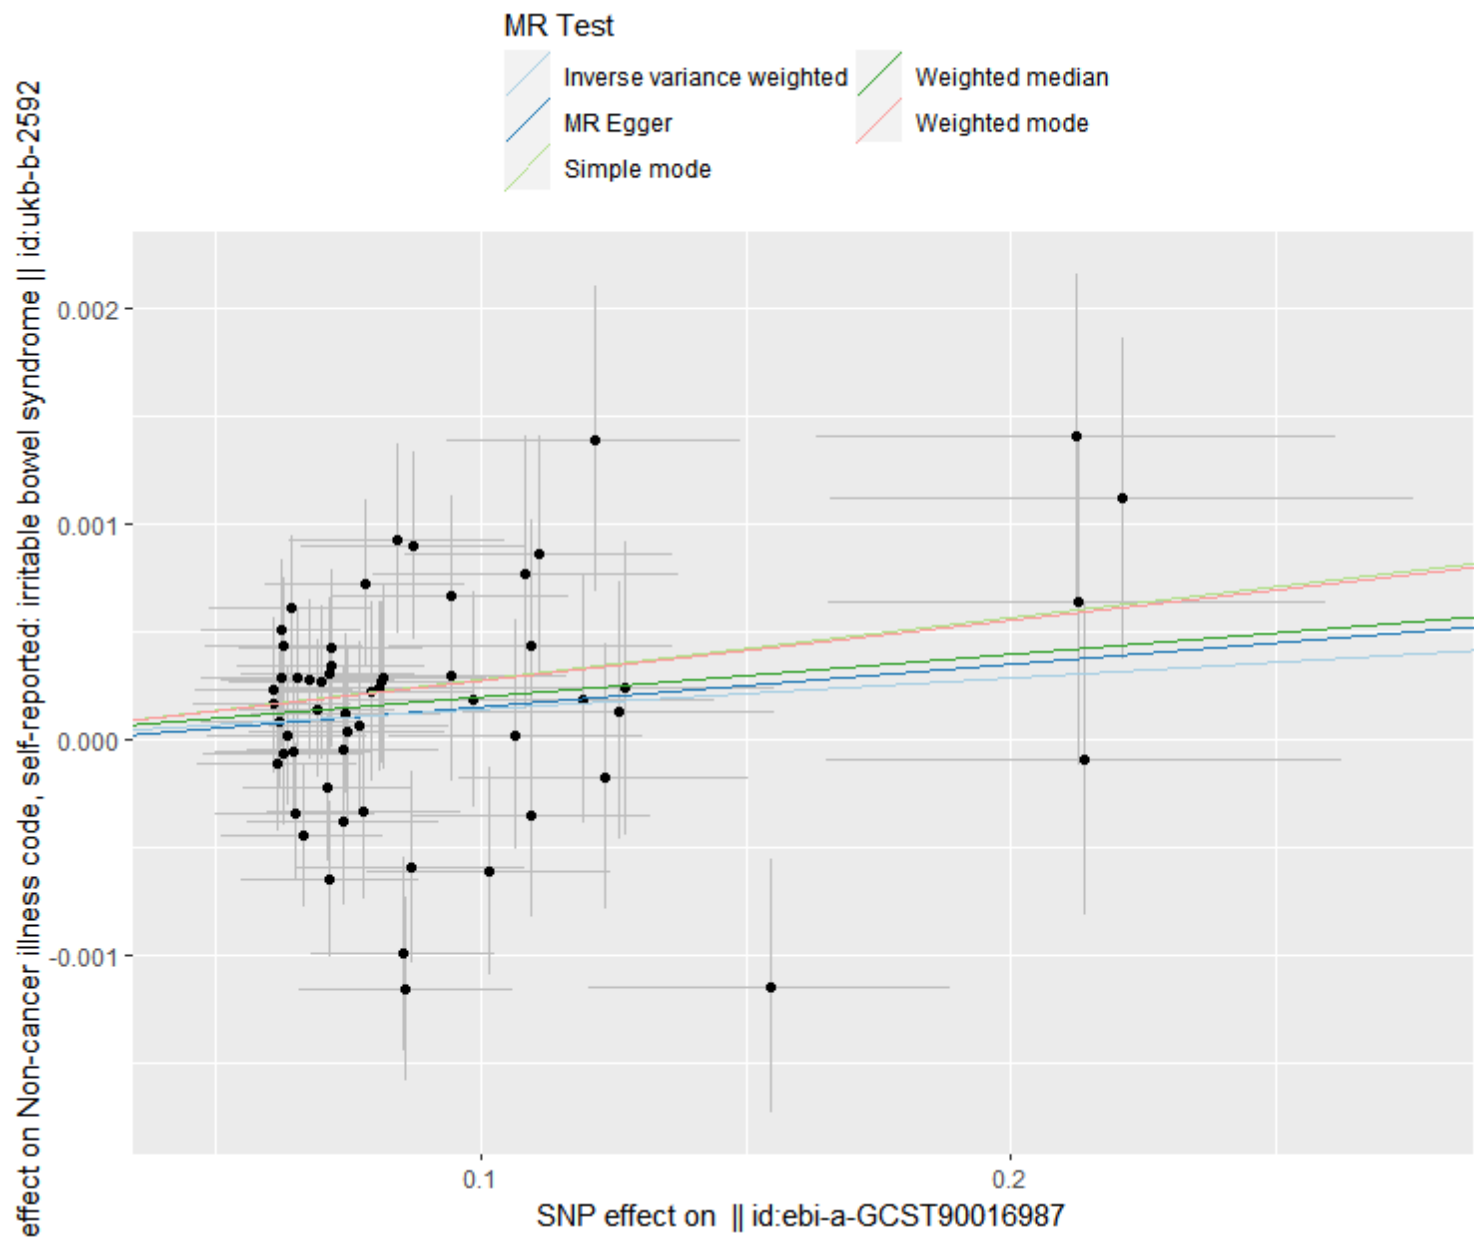

**Figure 100** Leave-one-out analysis, funnel plot, MR effect size and scatter plot for gut microbiota abundance (genus Lachnospiraceae NK4A136 group id.11319) on irritable bowel syndrome

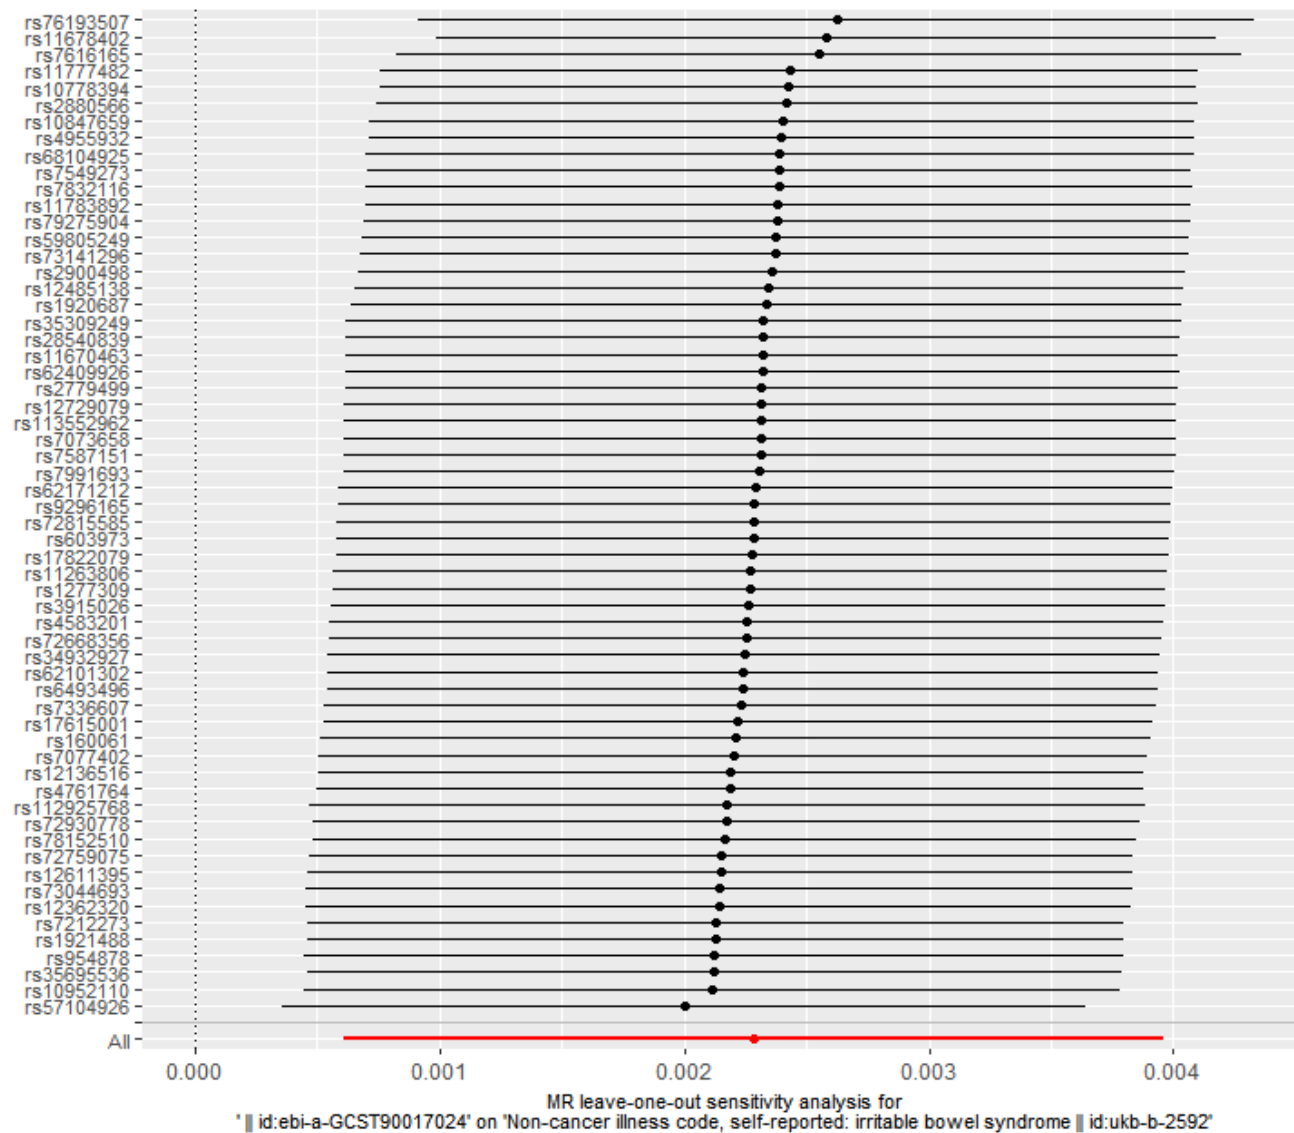

MR Method

- Inverse variance weighted
- MR Egger

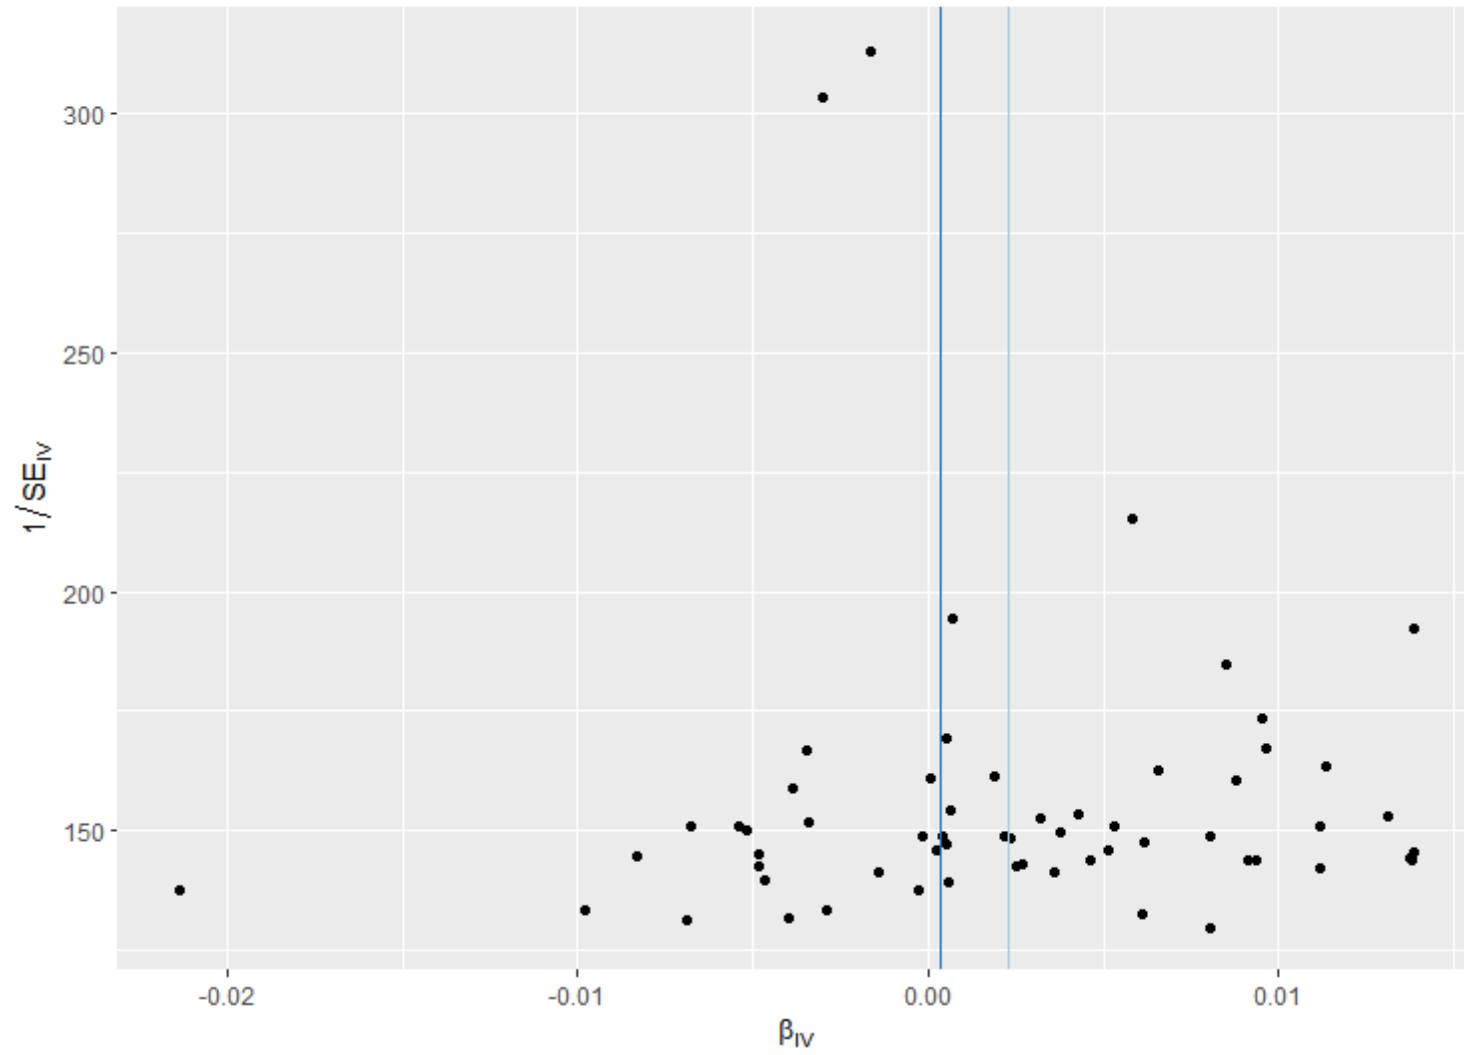

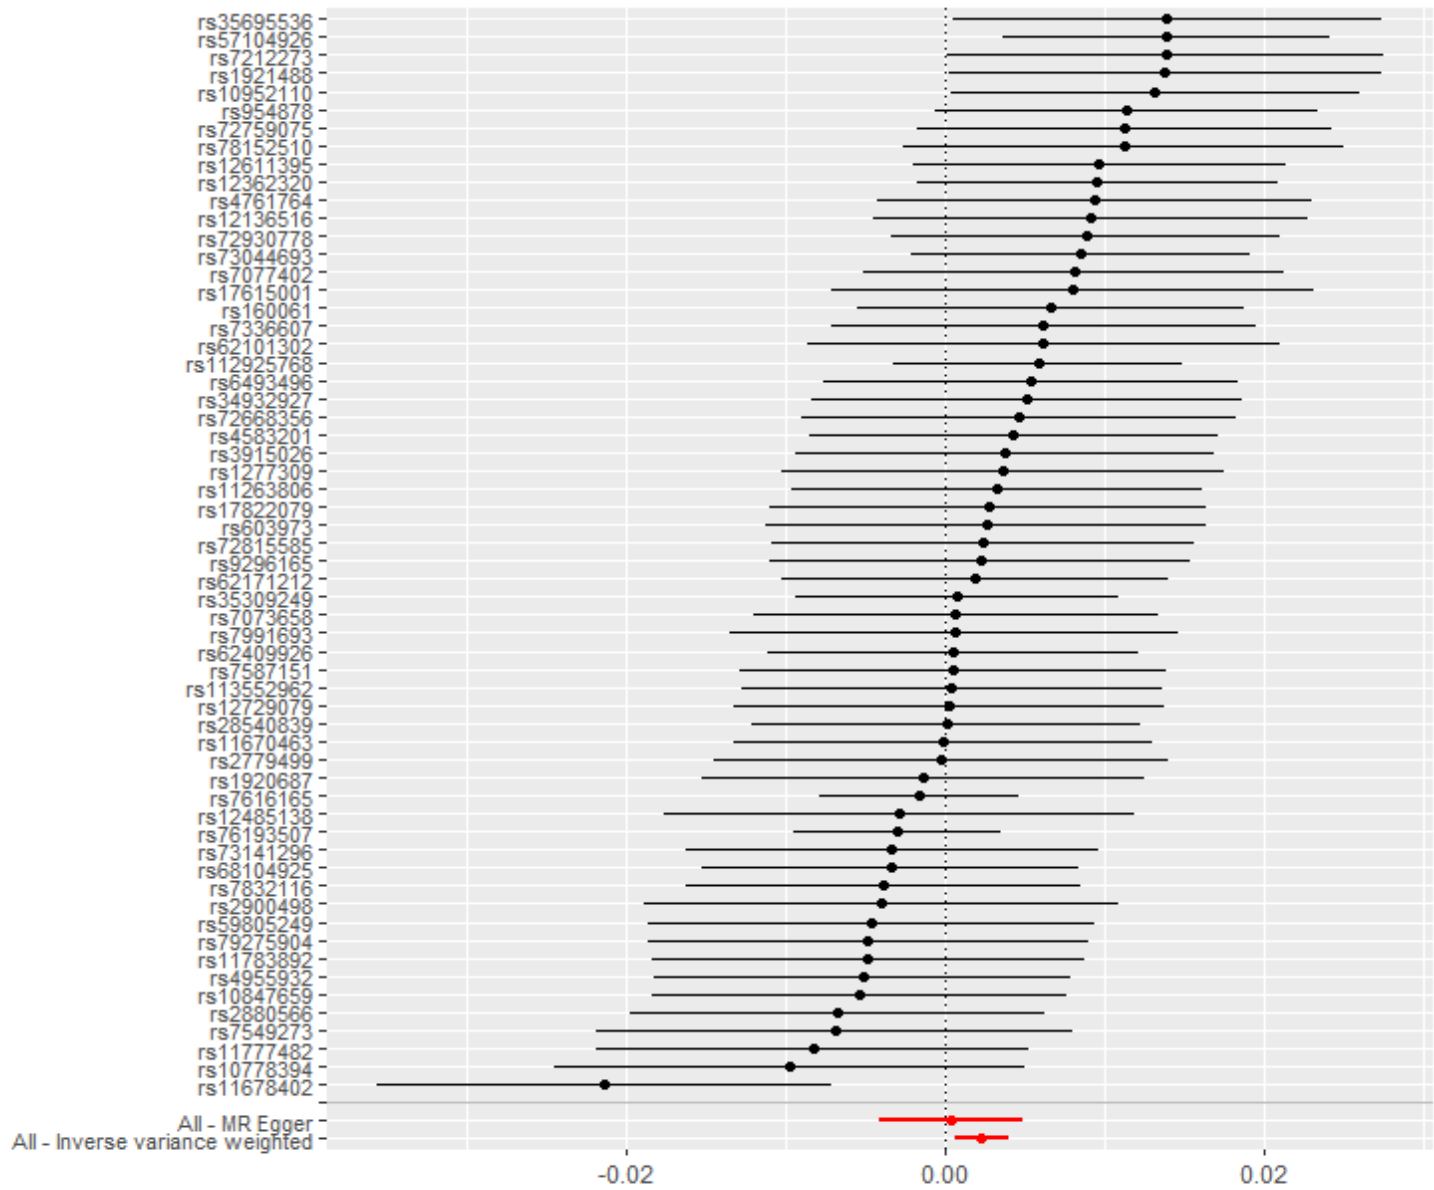

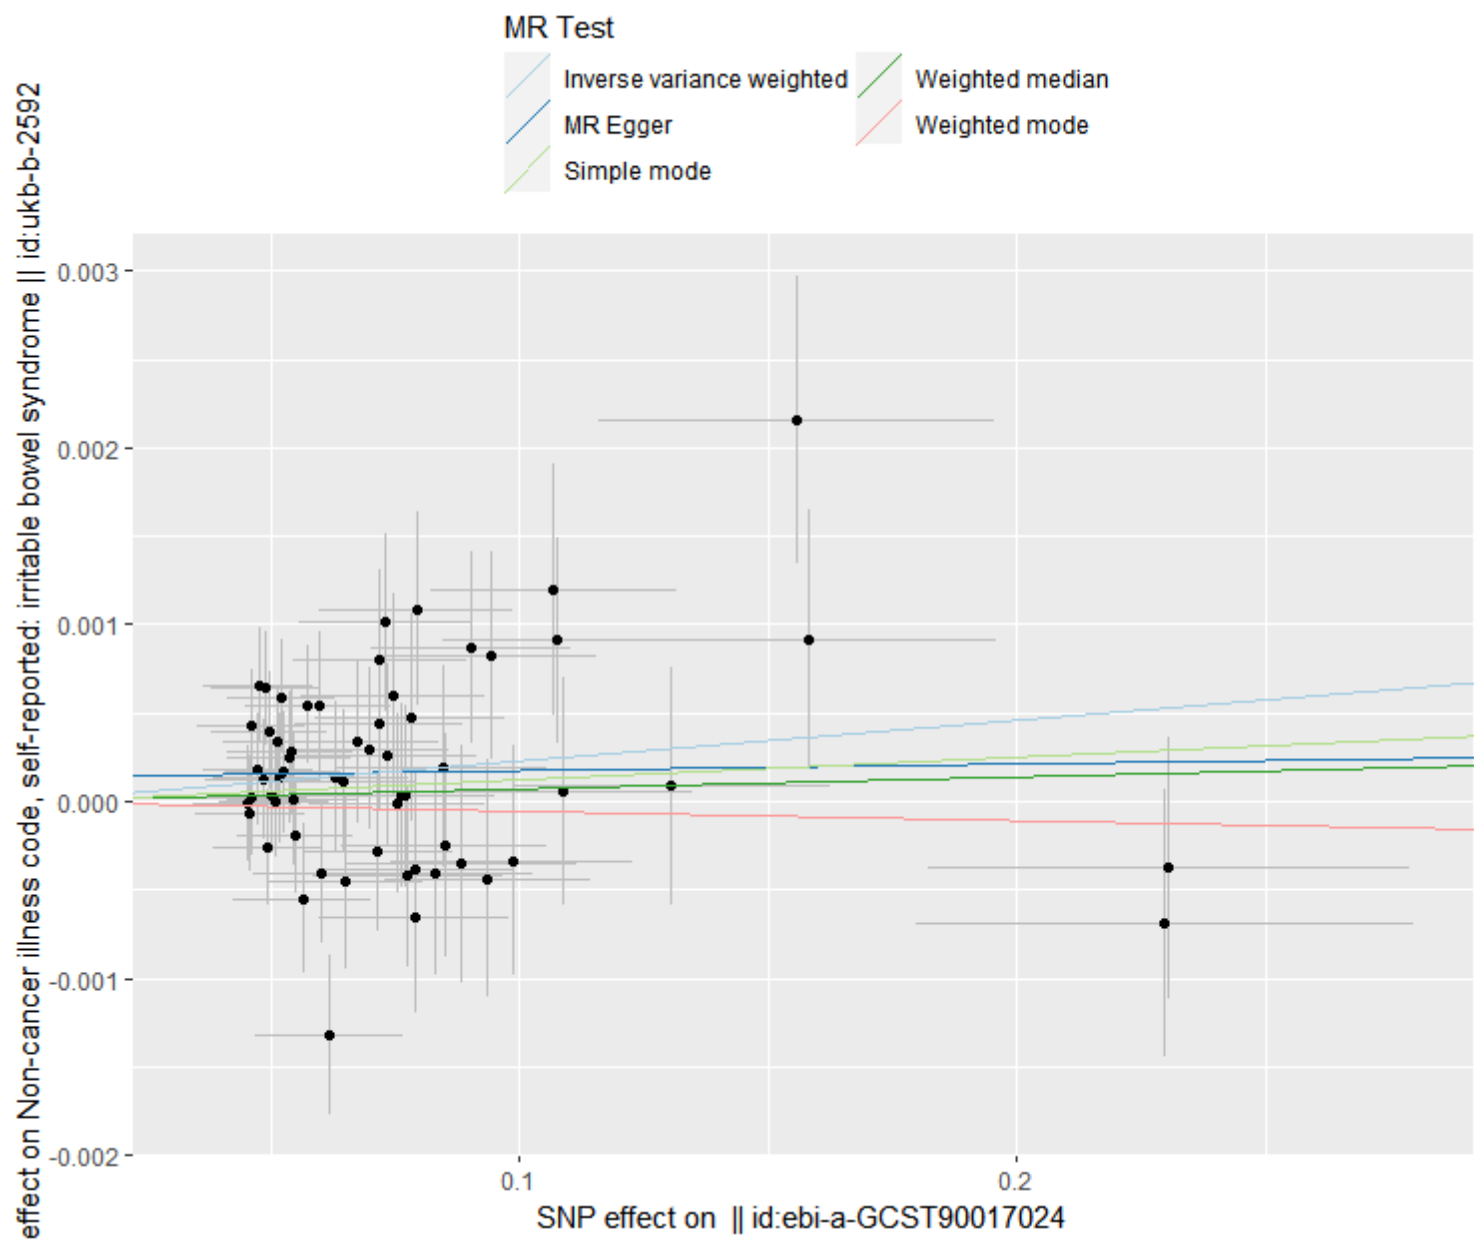



**Figure 101** Leave-one-out analysis, funnel plot, MR effect size and scatter plot for gut microbiota abundance (genus *Peptococcus* id.2037) on irritable bowel syndrome

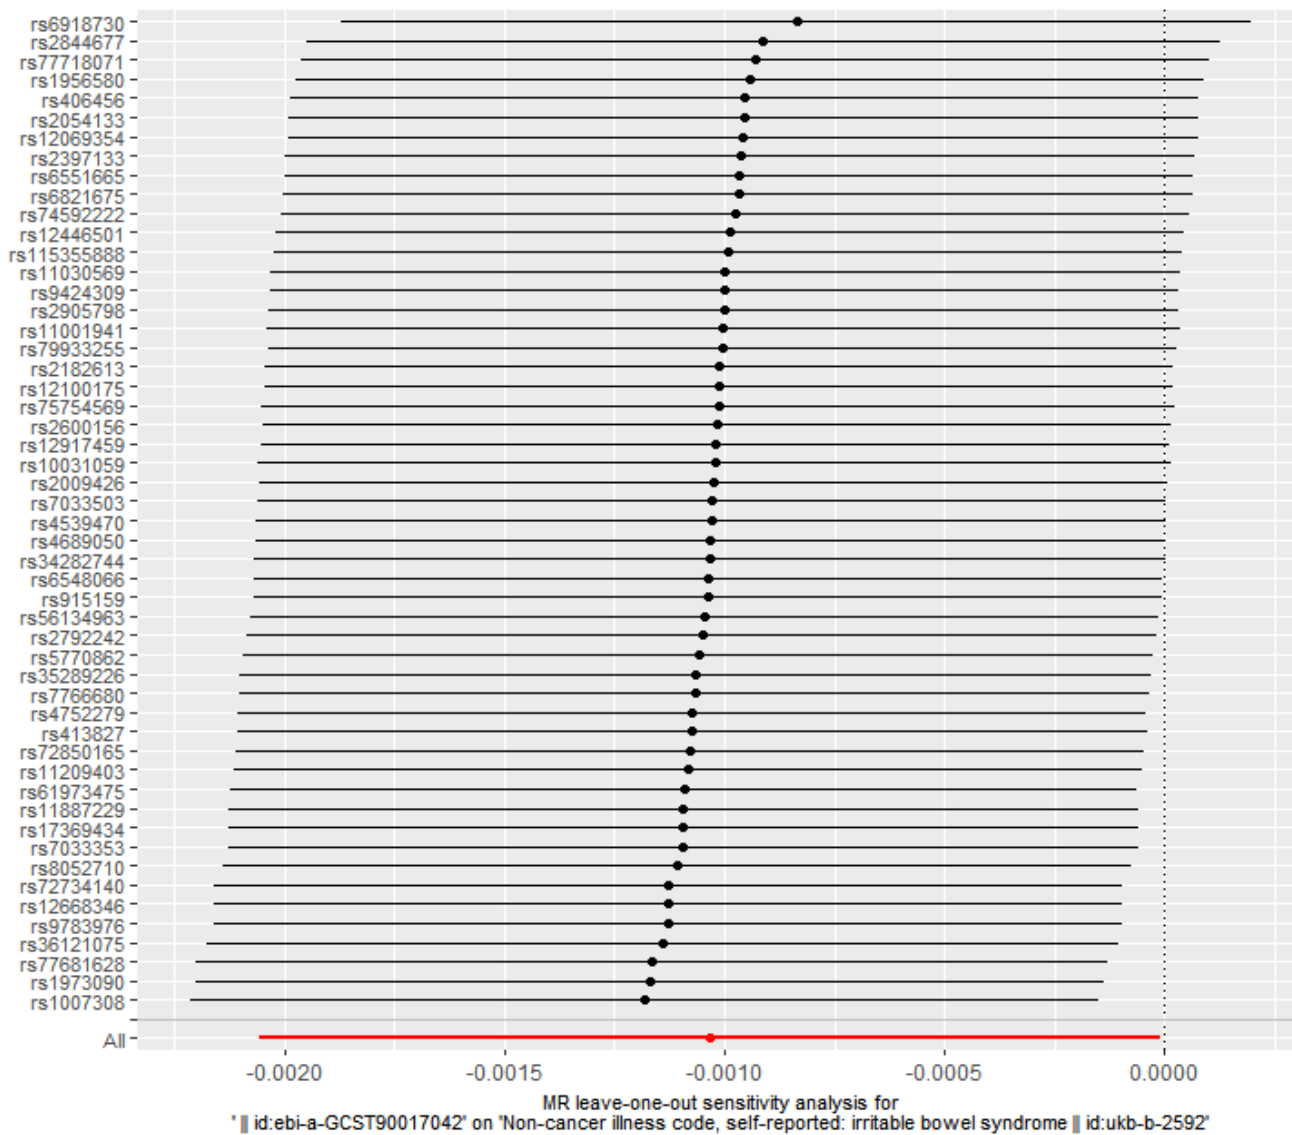

MR Method

- Inverse variance weighted
- MR Egger

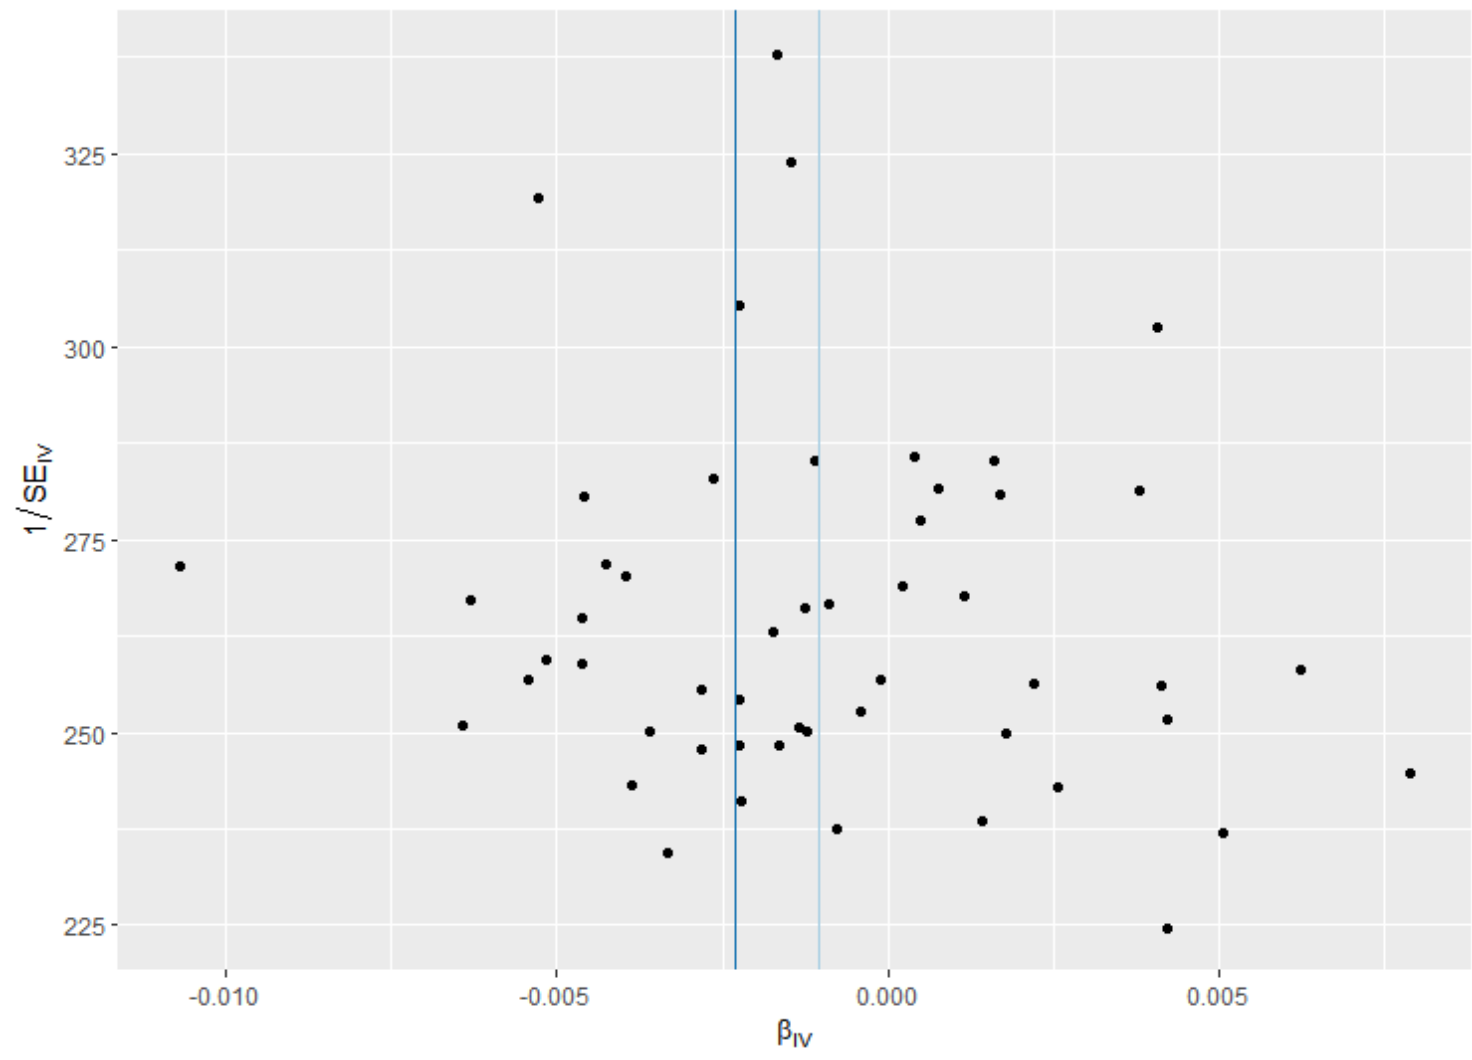

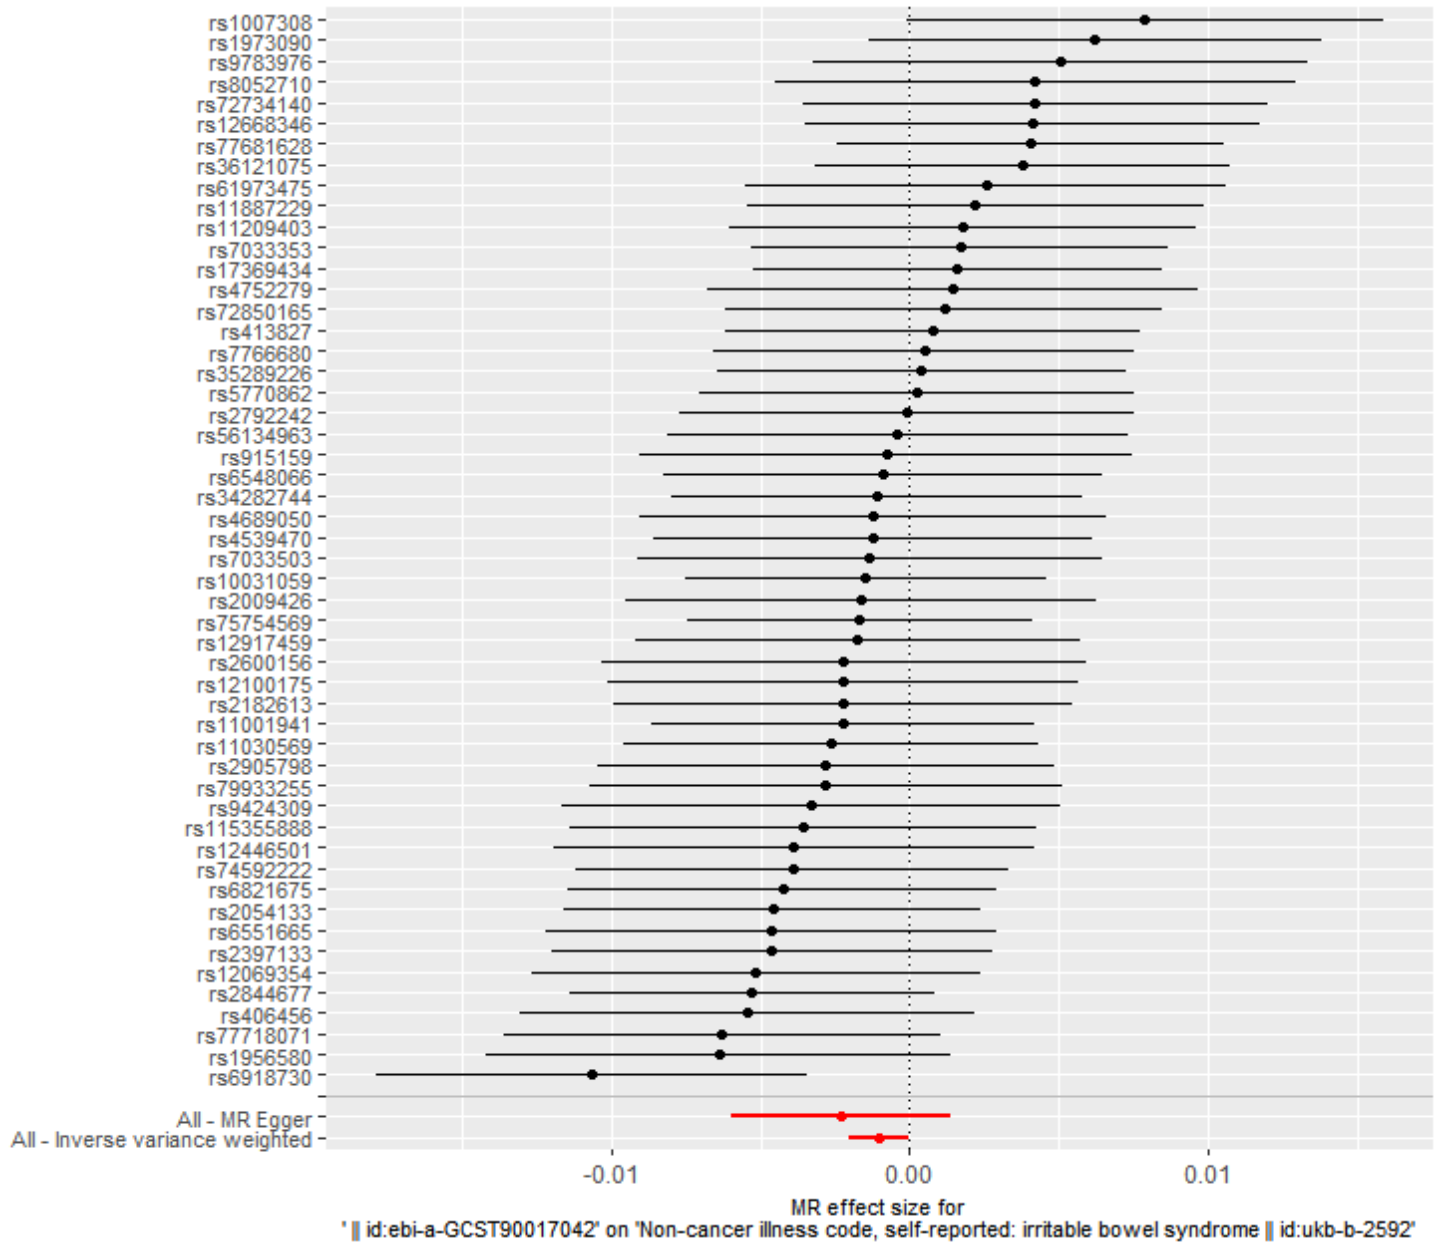

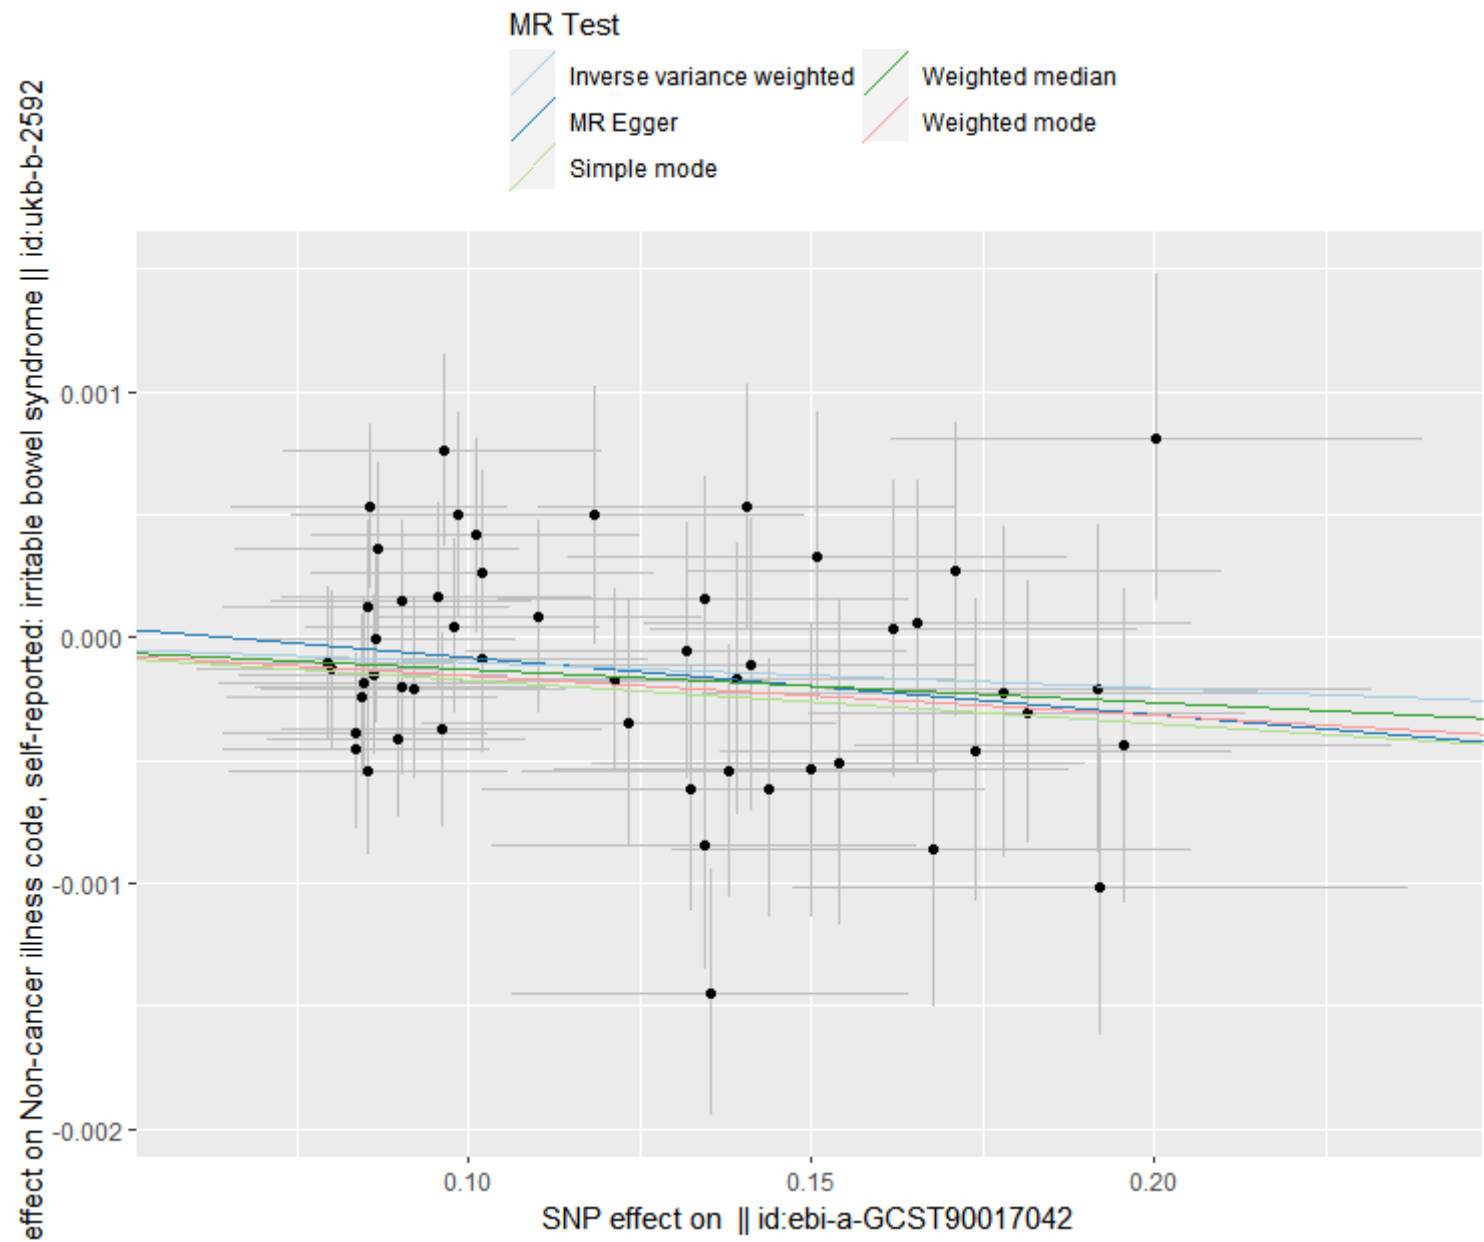

**Figure 102** Leave-one-out analysis, funnel plot, MR effect size and scatter plot for gut microbiota abundance (genus Tyzzerella3 id.11335) on irritable bowel syndrome

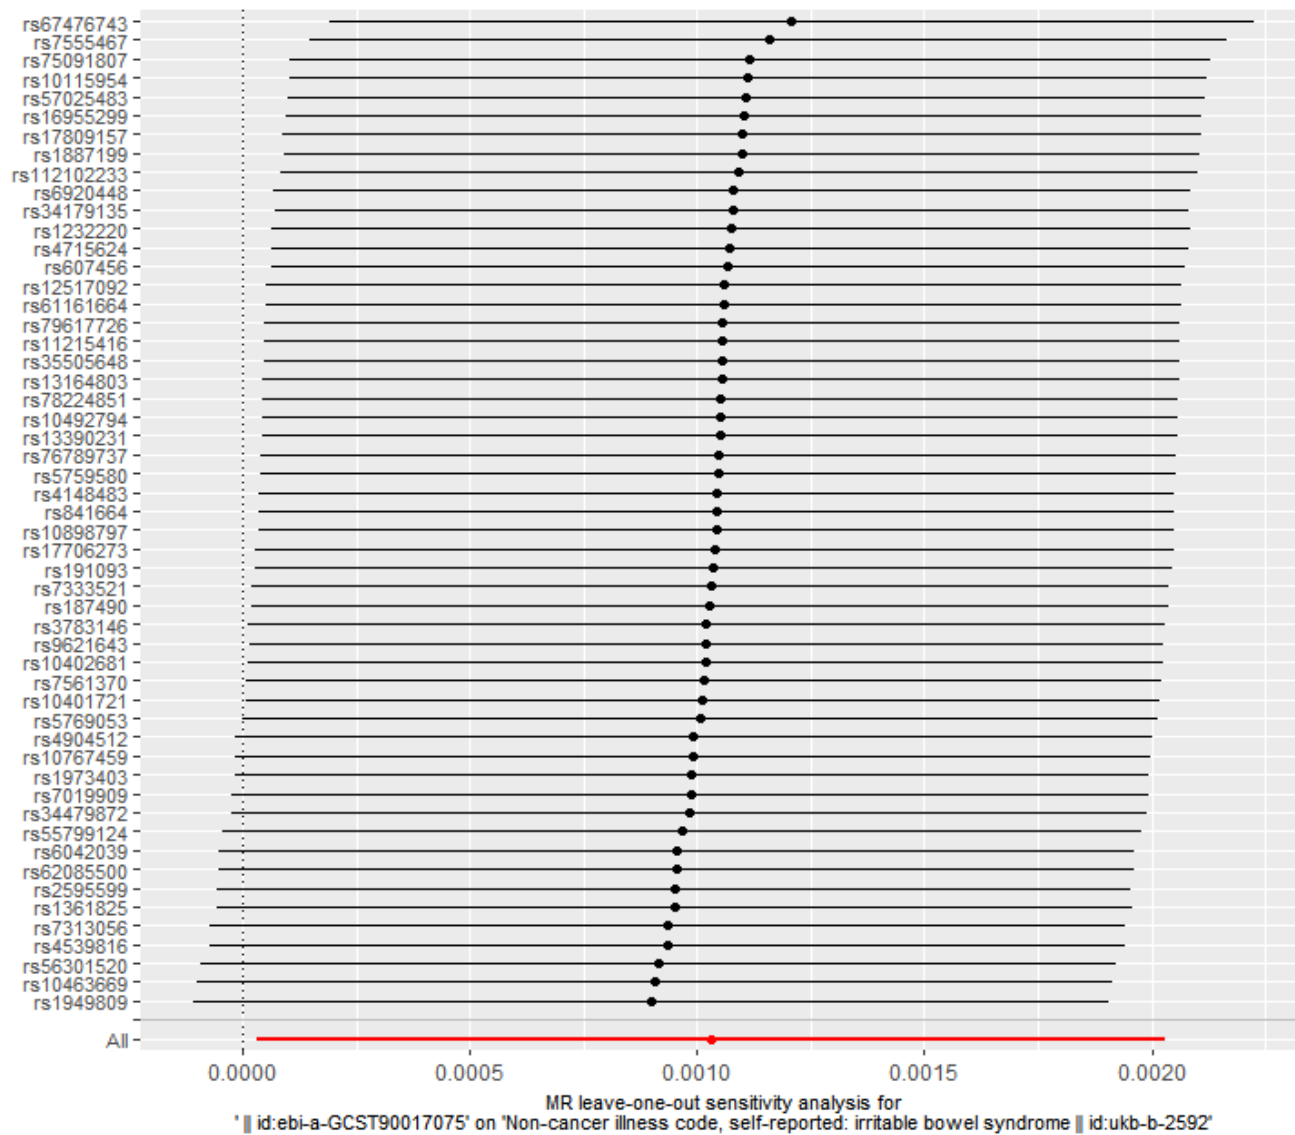

MR Method

- Inverse variance weighted
- MR Egger

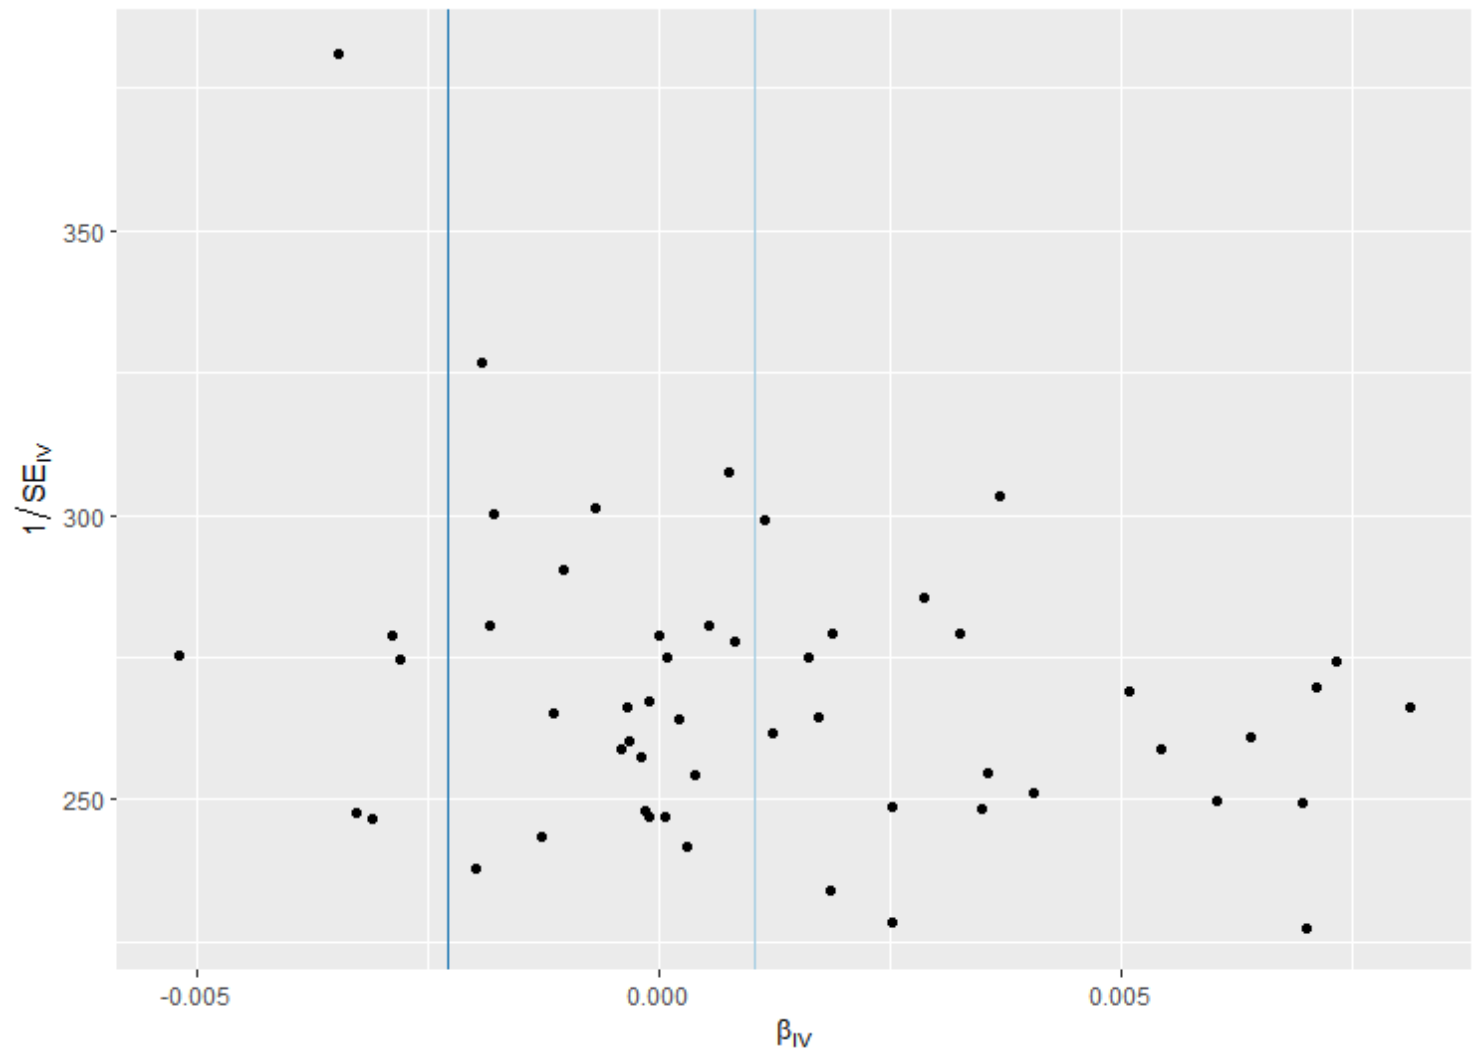

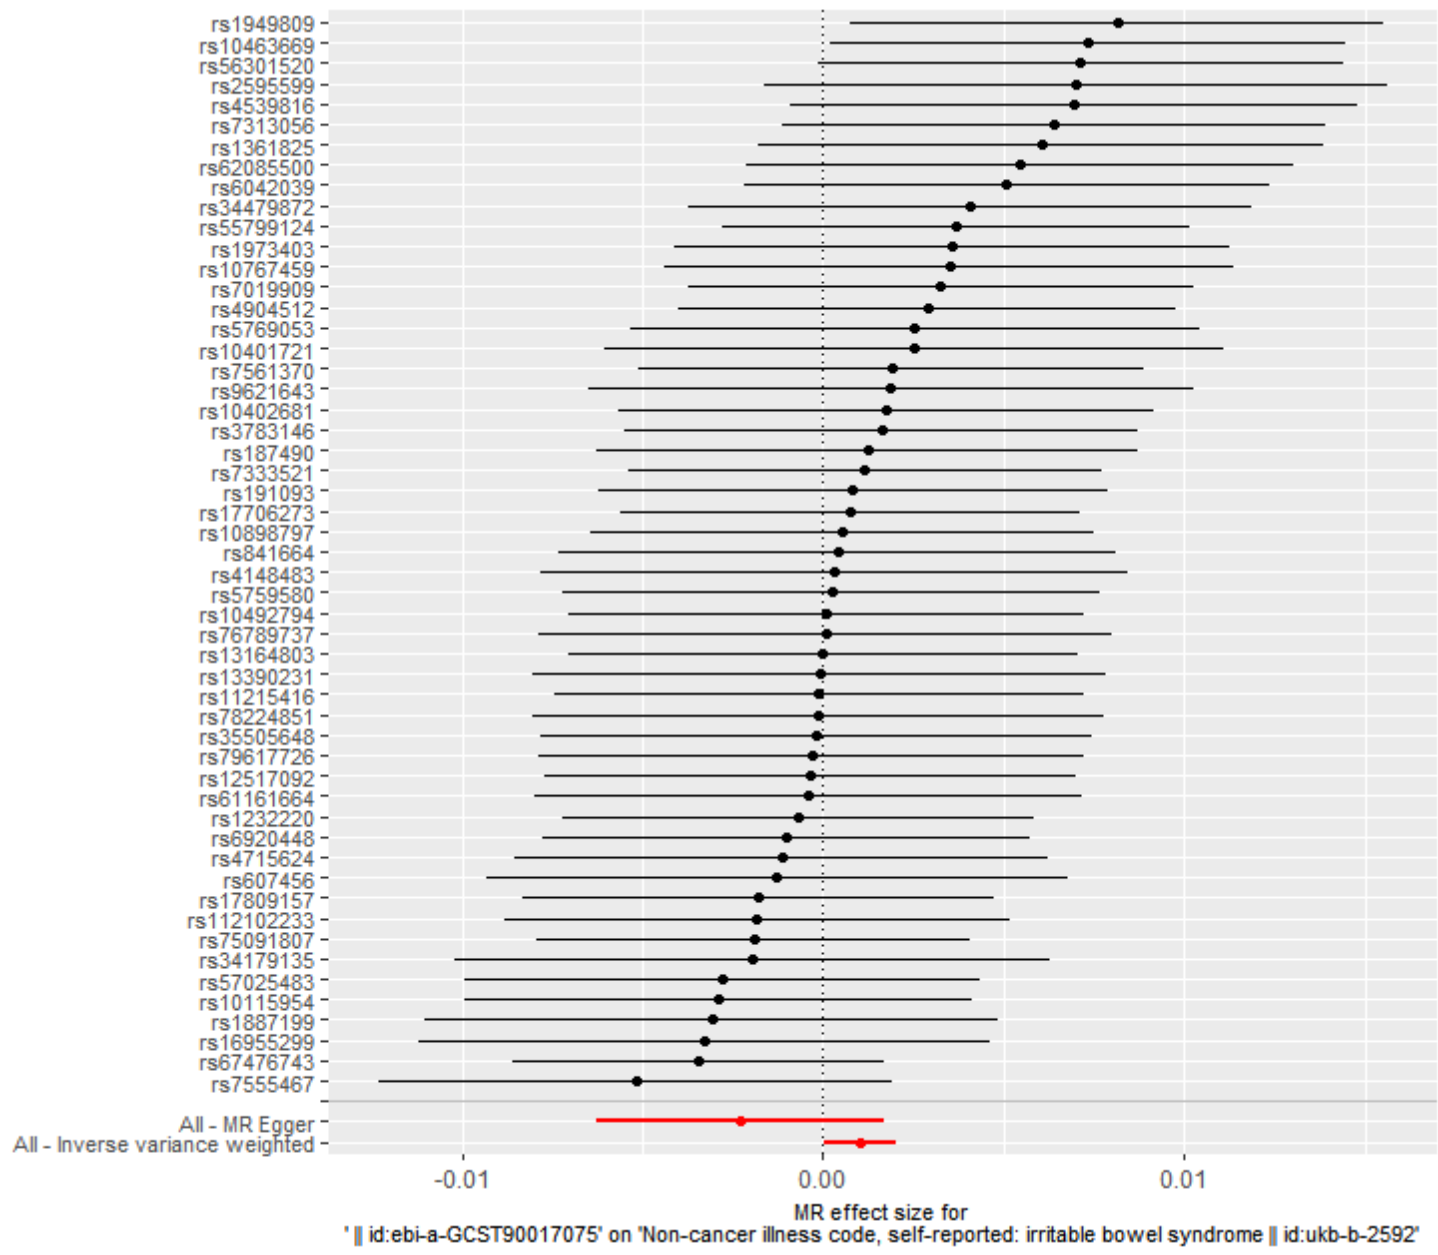

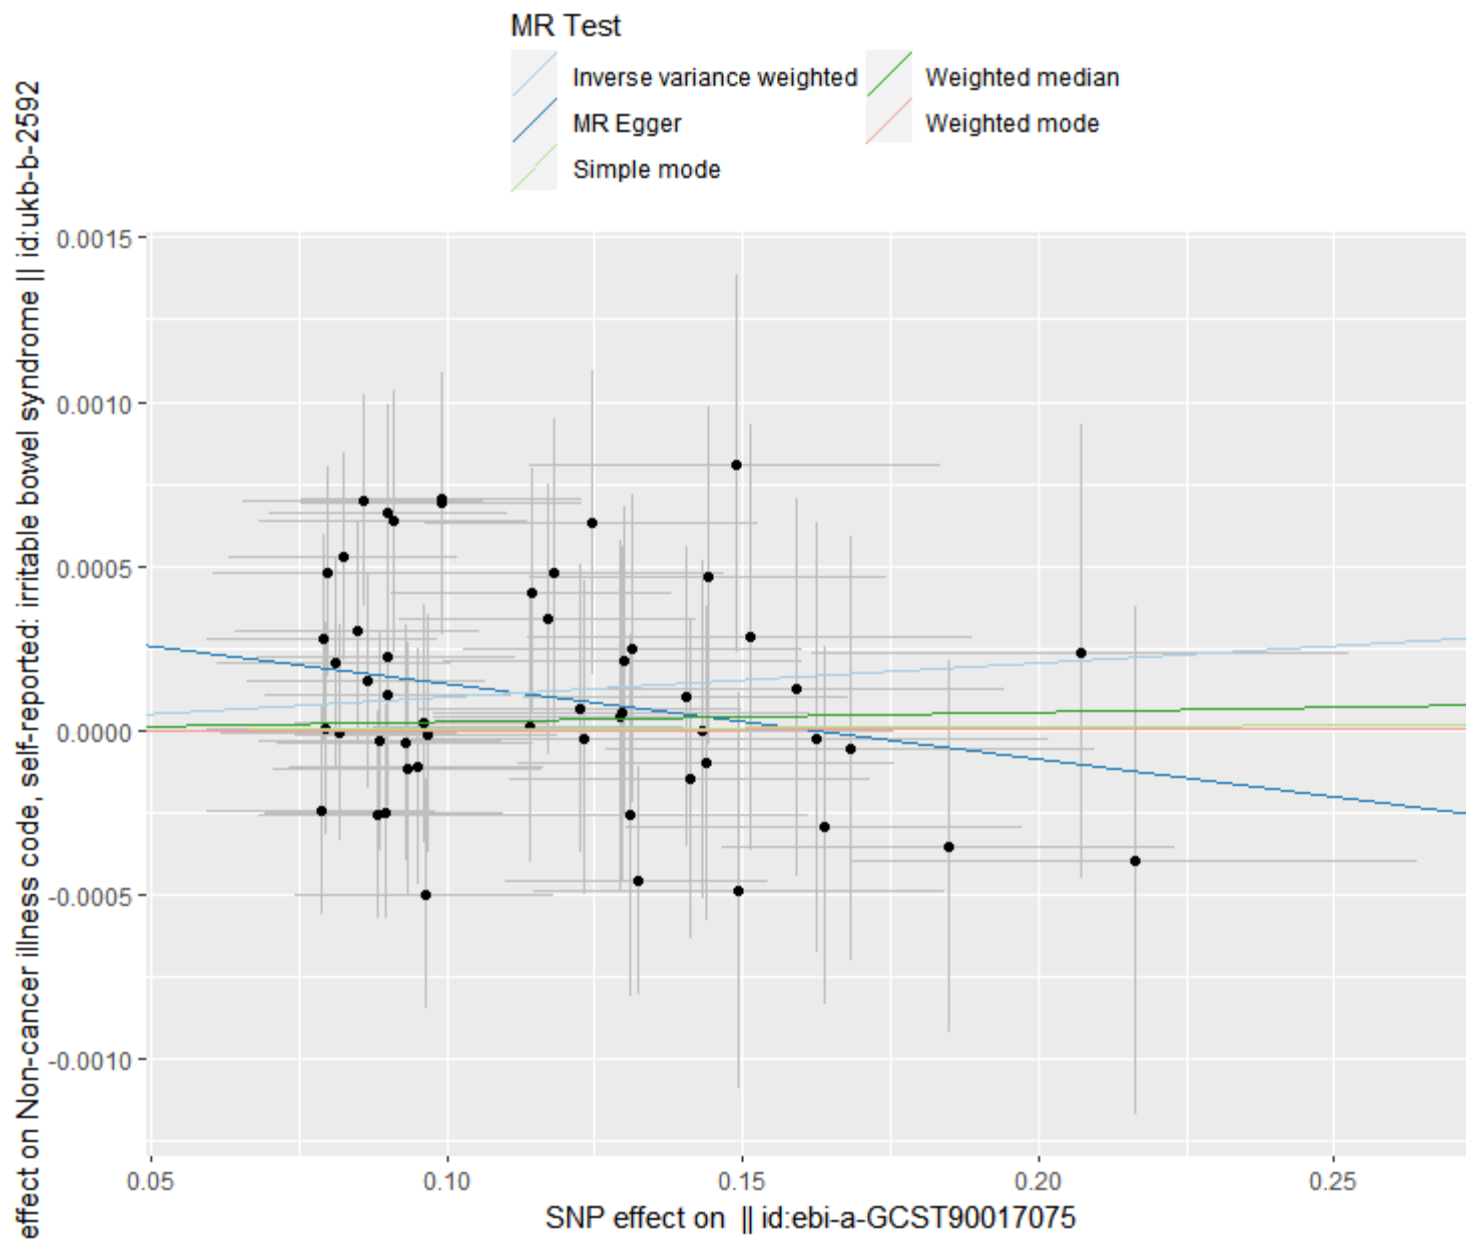



**Figure 103** Leave-one-out analysis, funnel plot, MR effect size and scatter plot for gut microbiota abundance (class Negativicutes id.2164) on diverticular disease

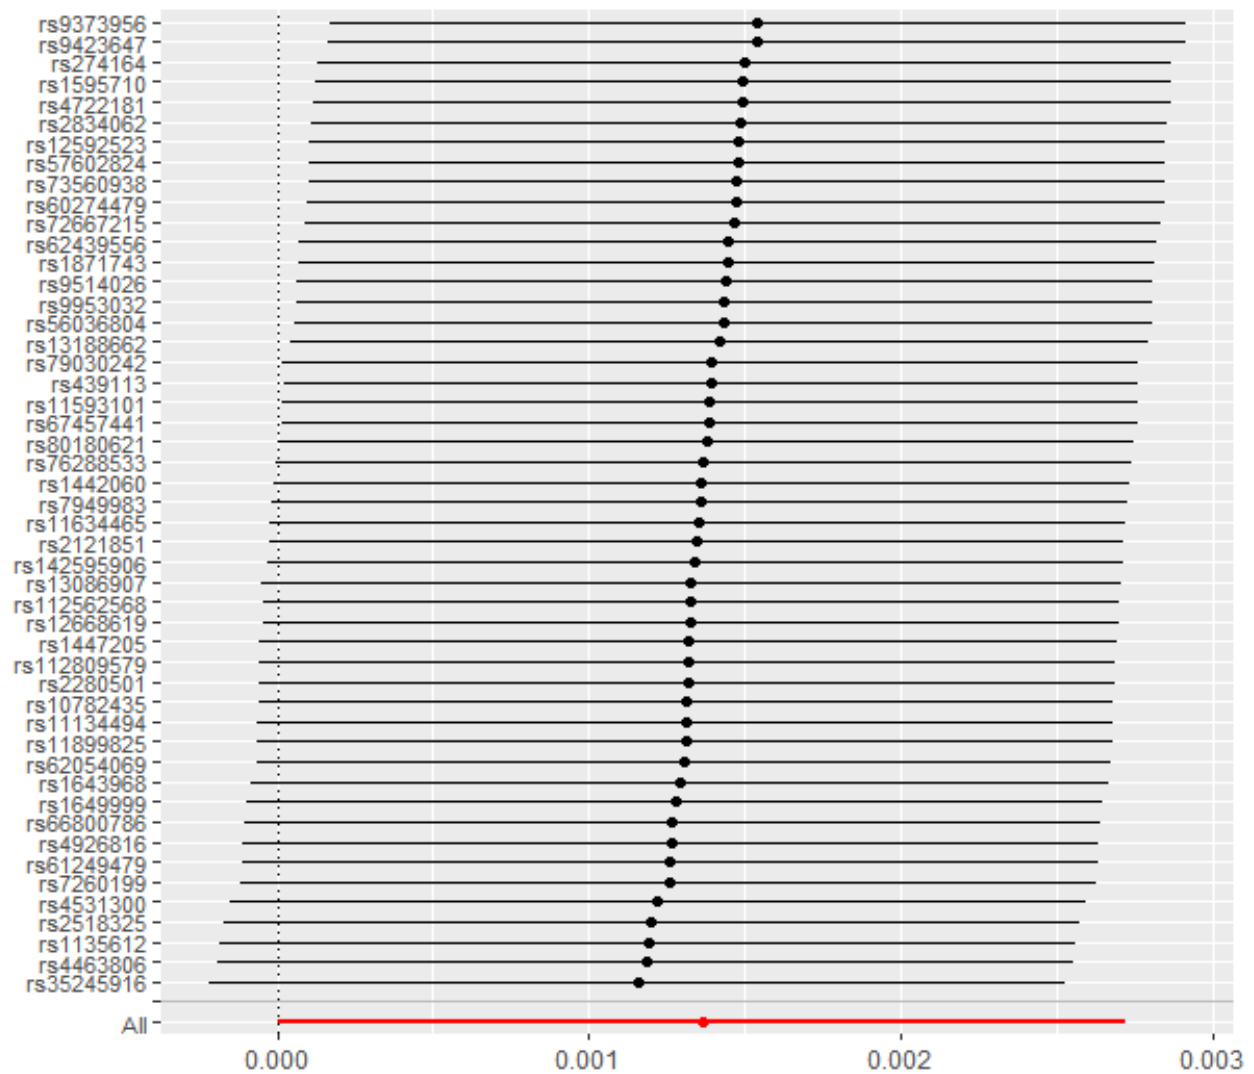

MR leave-one-out sensitivity analysis for  
' || id:ebi-a-GCST90016922' on 'Non-cancer illness code, self-reported: diverticular disease/diverticulitis || id:ukb-b-14'

MR Method

- Inverse variance weighted
- MR Egger

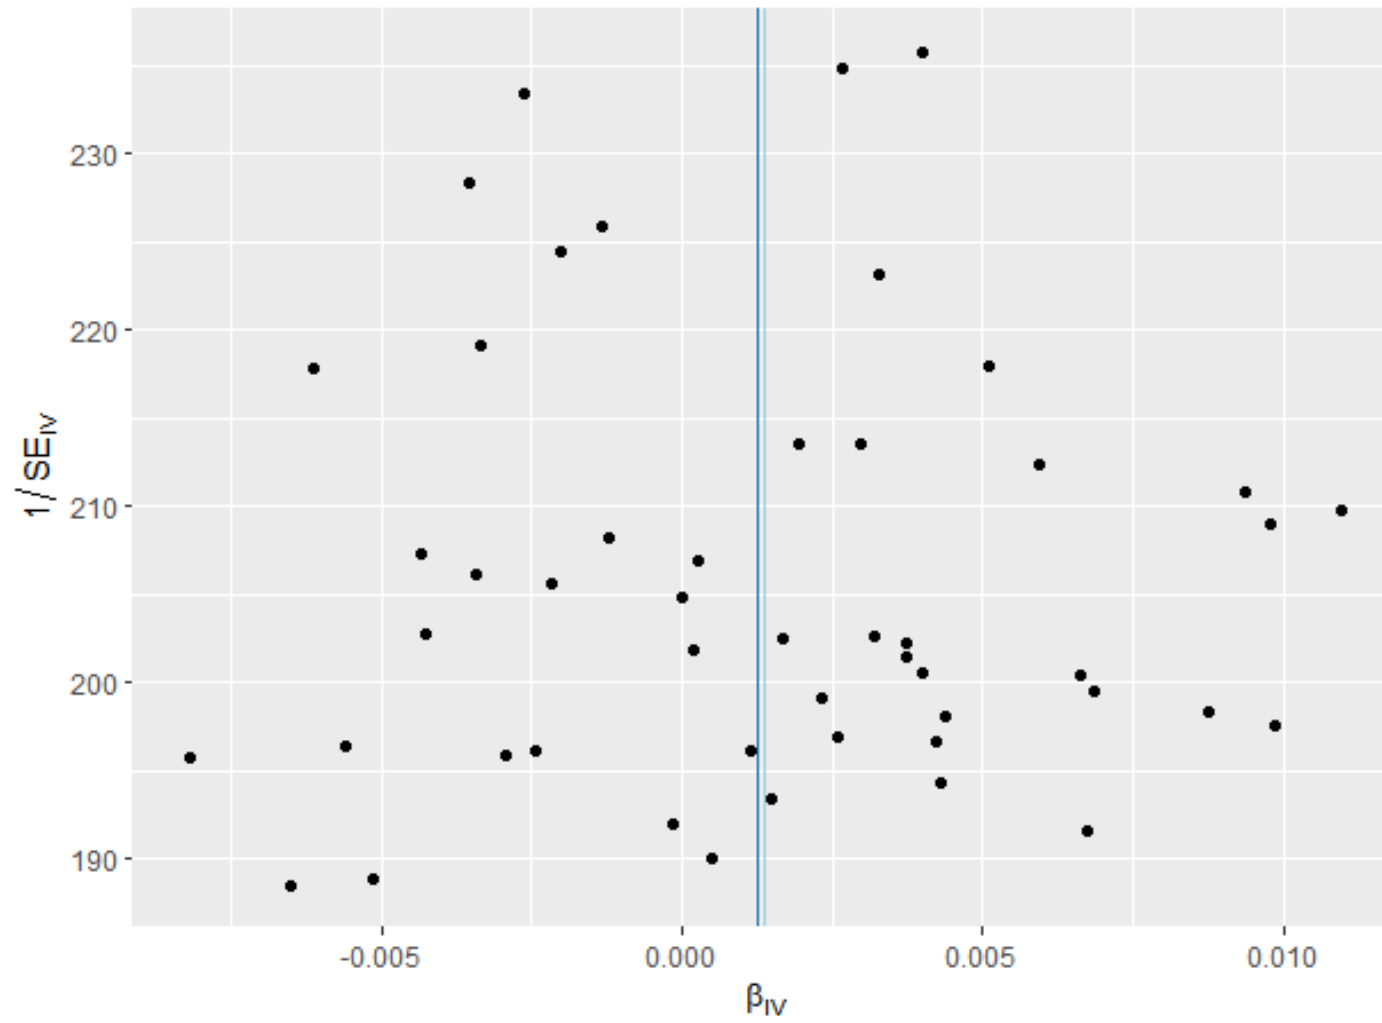

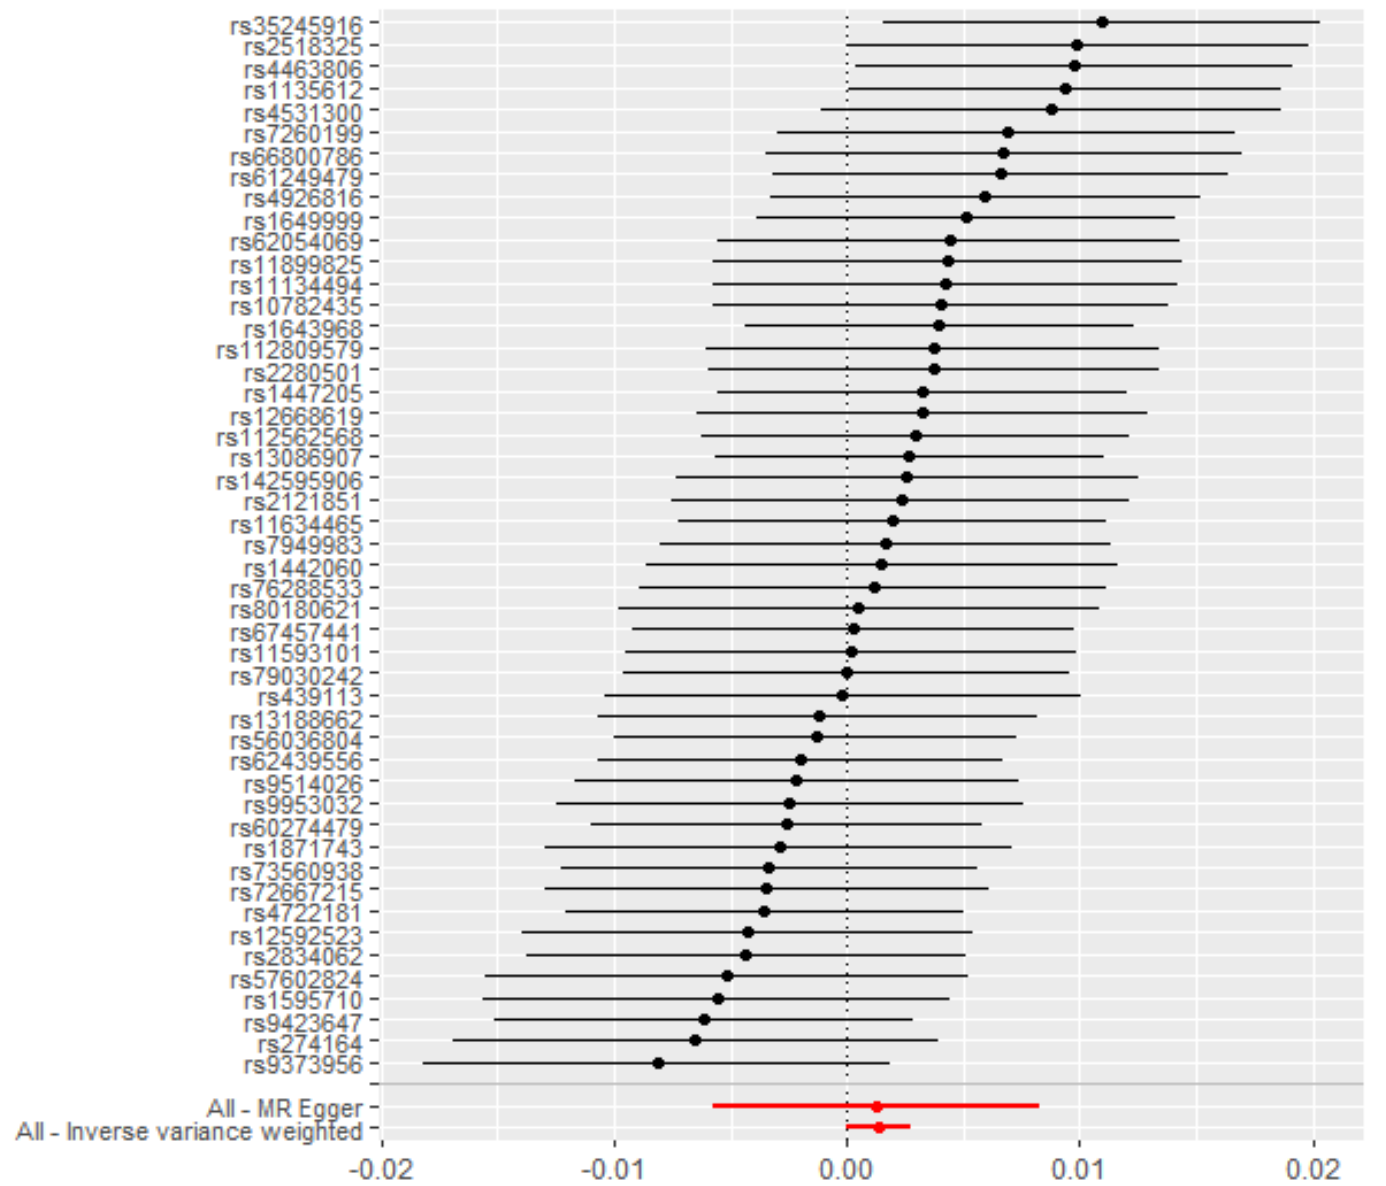

MR effect size for  
' || id:ebi-a-GCST90016922' on 'Non-cancer illness code, self-reported: diverticular disease/diverticulitis || id

non-cancer illness code, self-reported: diverticular disease/diverticulitis || id:ukb-b-147

MR Test

- Inverse variance weighted
- MR Egger
- Simple mode
- Weighted median
- Weighted mode

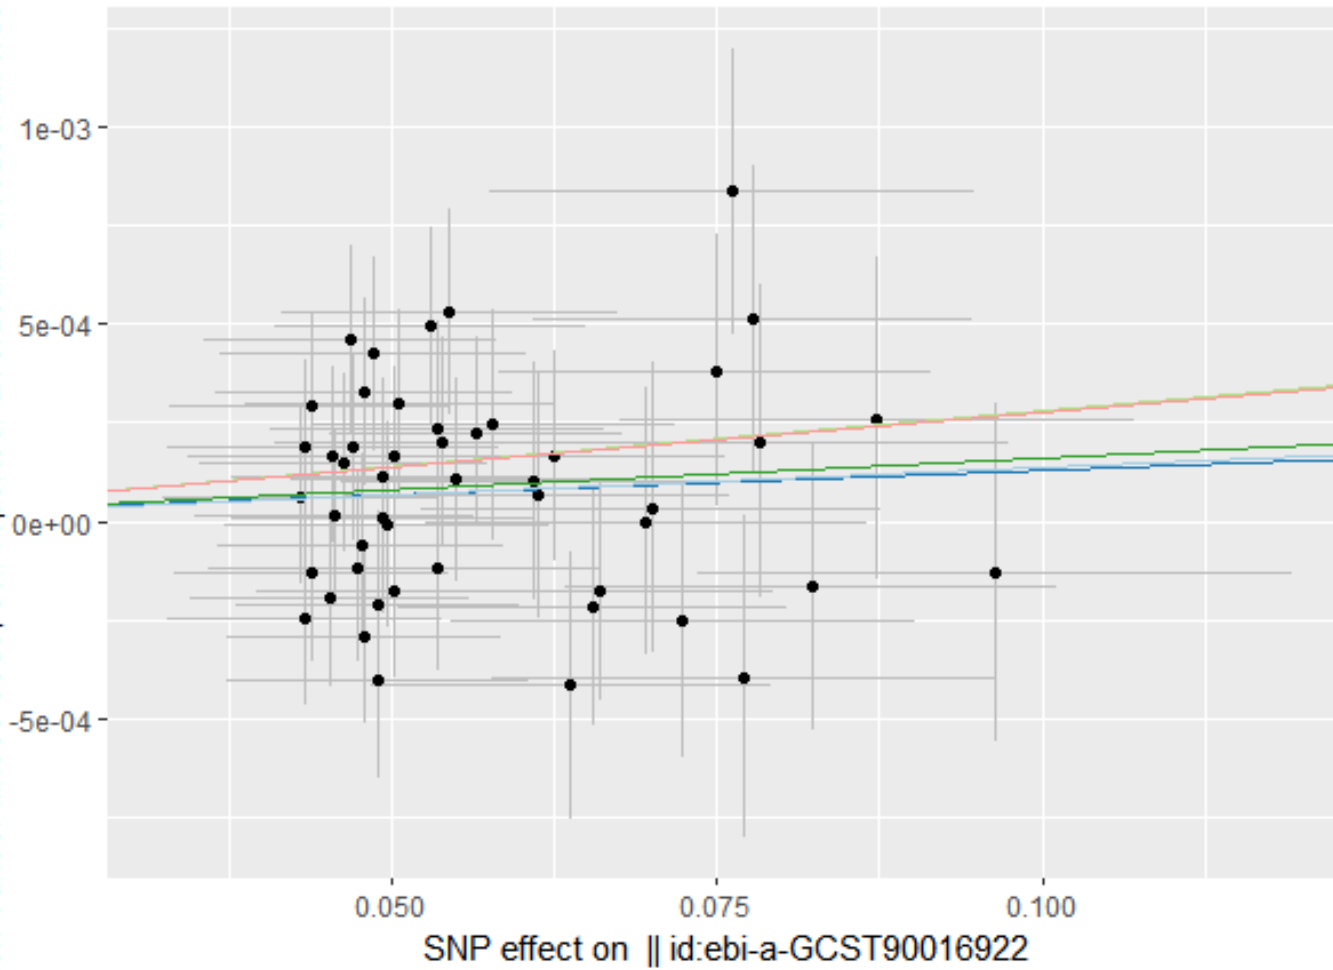

**Figure 104** Leave-one-out analysis, funnel plot, MR effect size and scatter plot for gut microbiota abundance (family Alcaligenaceae id.2875) on diverticular disease

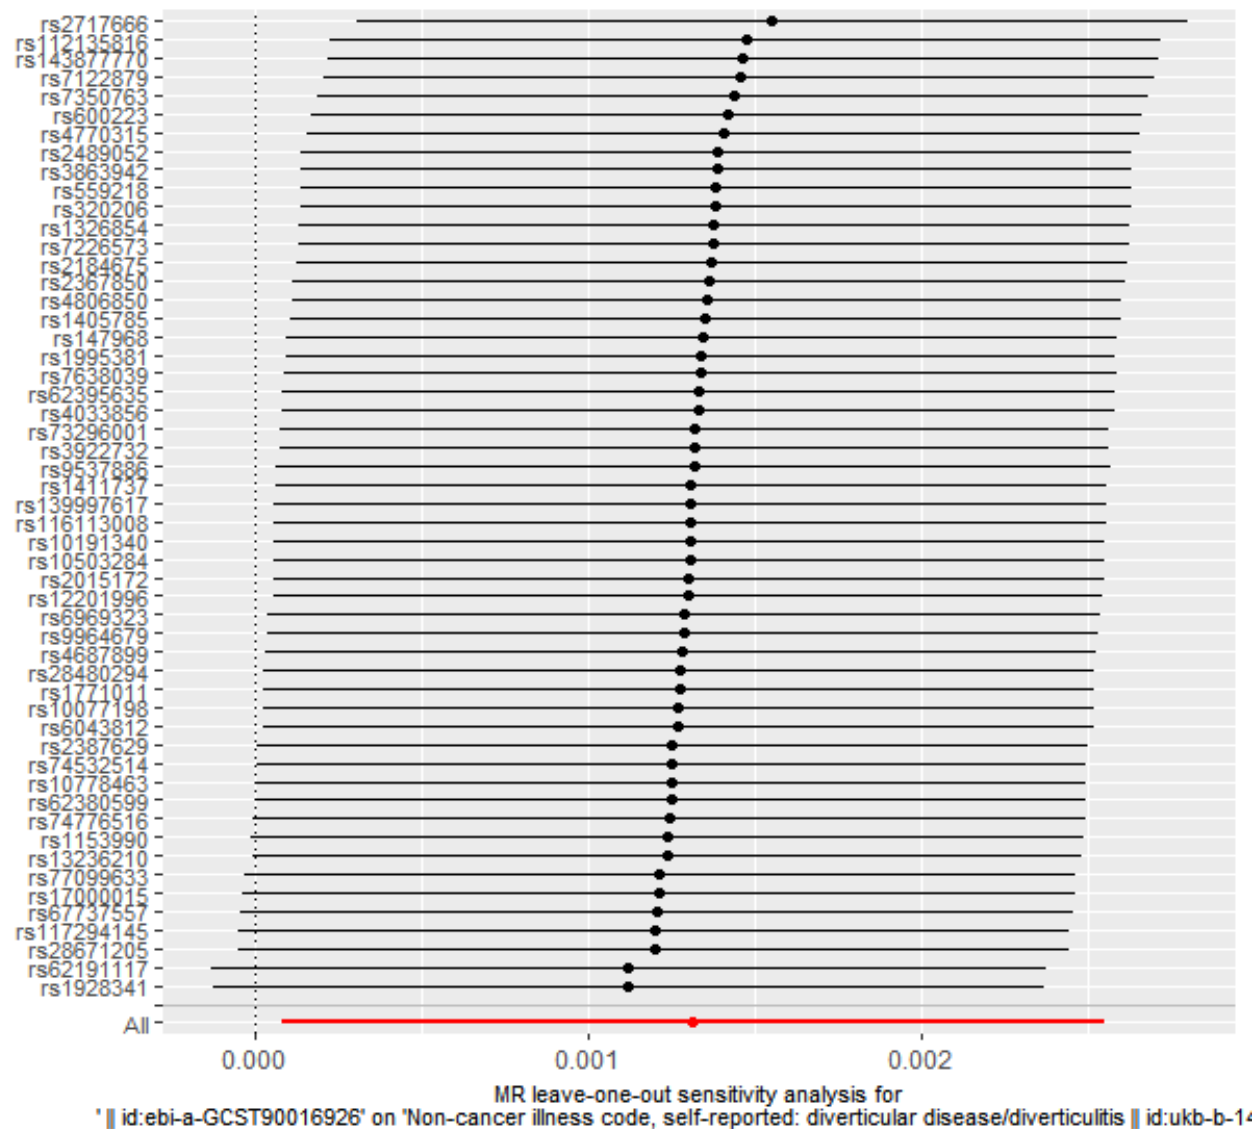

MR Method

- Inverse variance weighted
- MR Egger

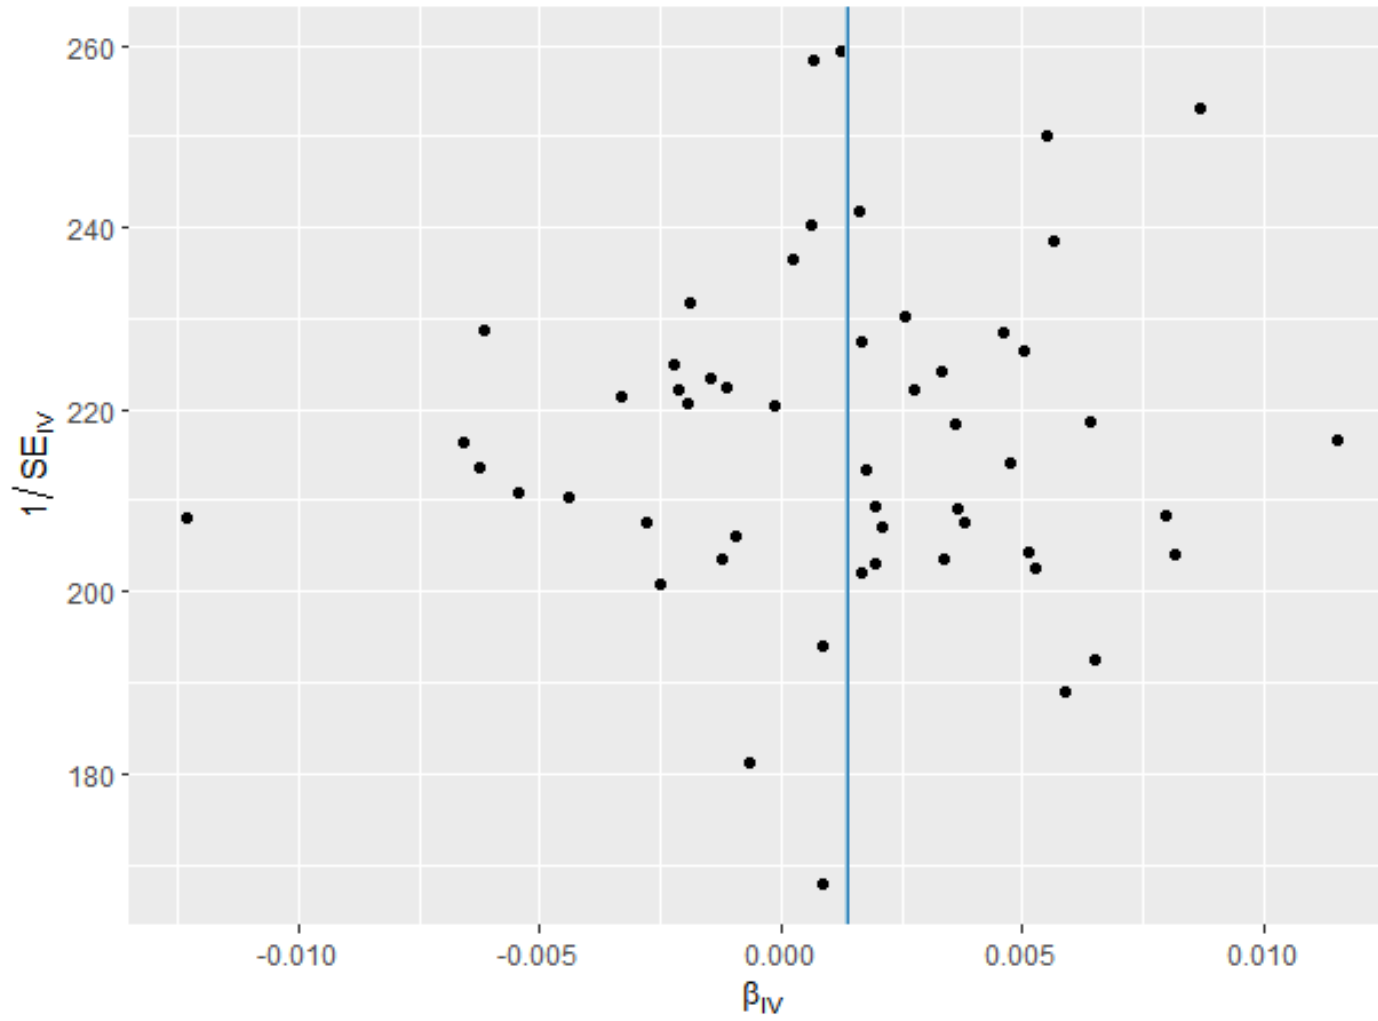

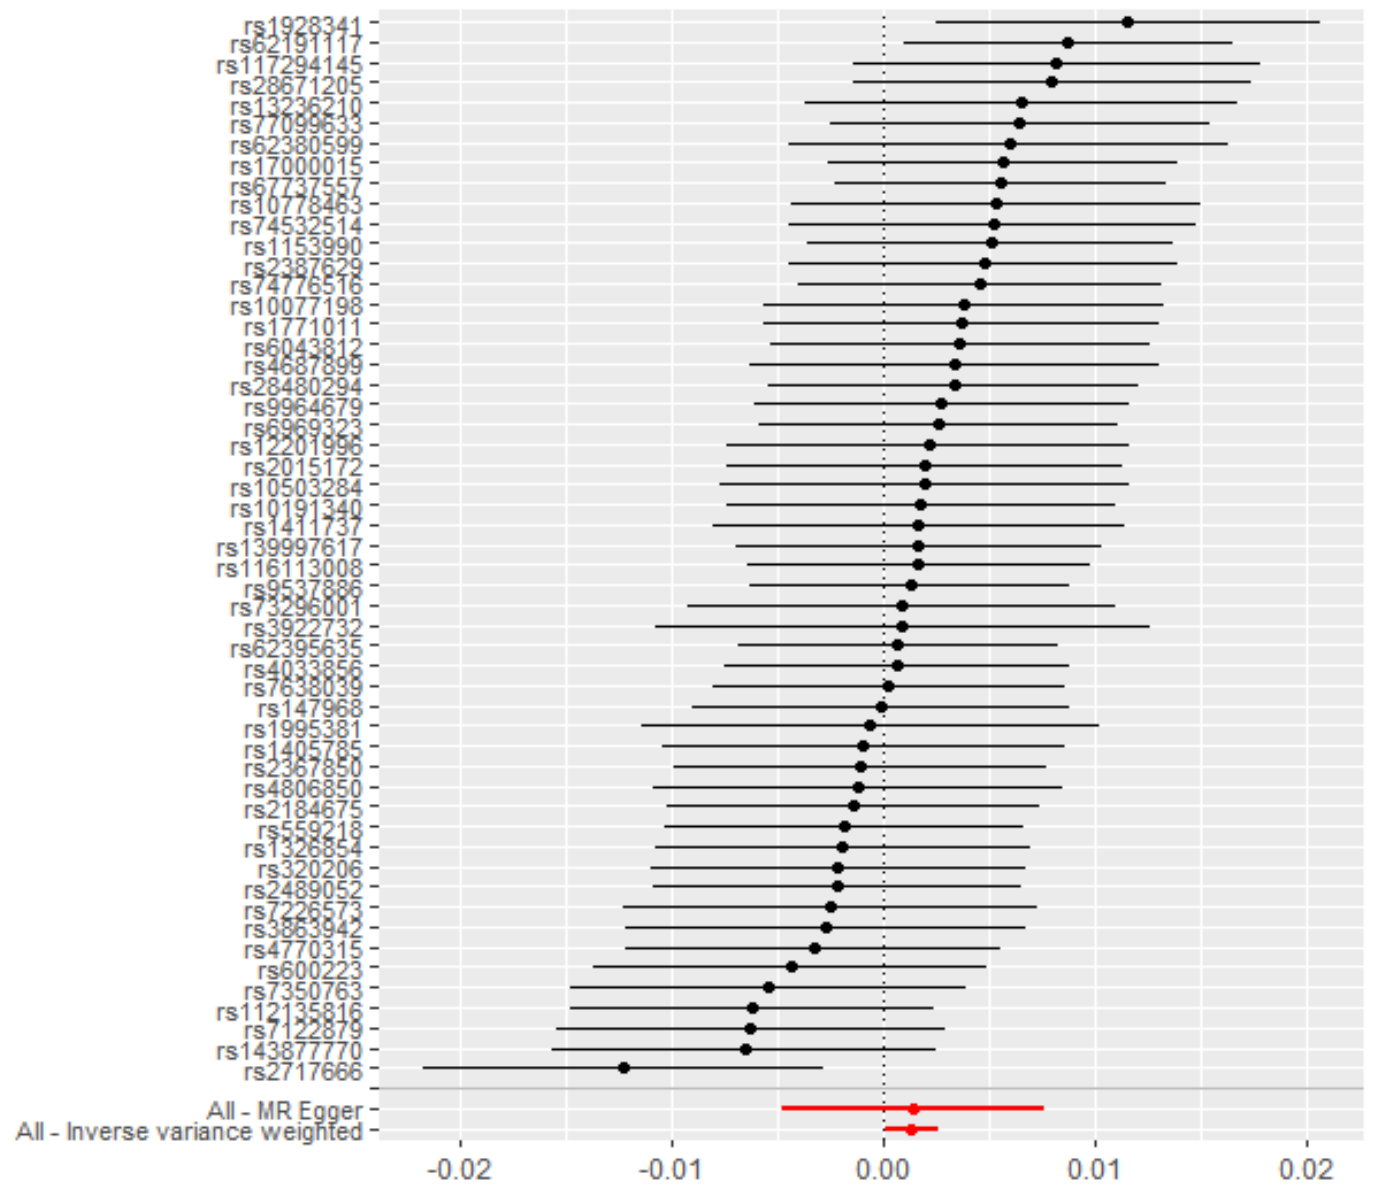

non-cancer illness code, self-reported: diverticular disease/diverticulitis || id:ukb-b-147

MR Test

- Inverse variance weighted
- MR Egger
- Simple mode
- Weighted median
- Weighted mode

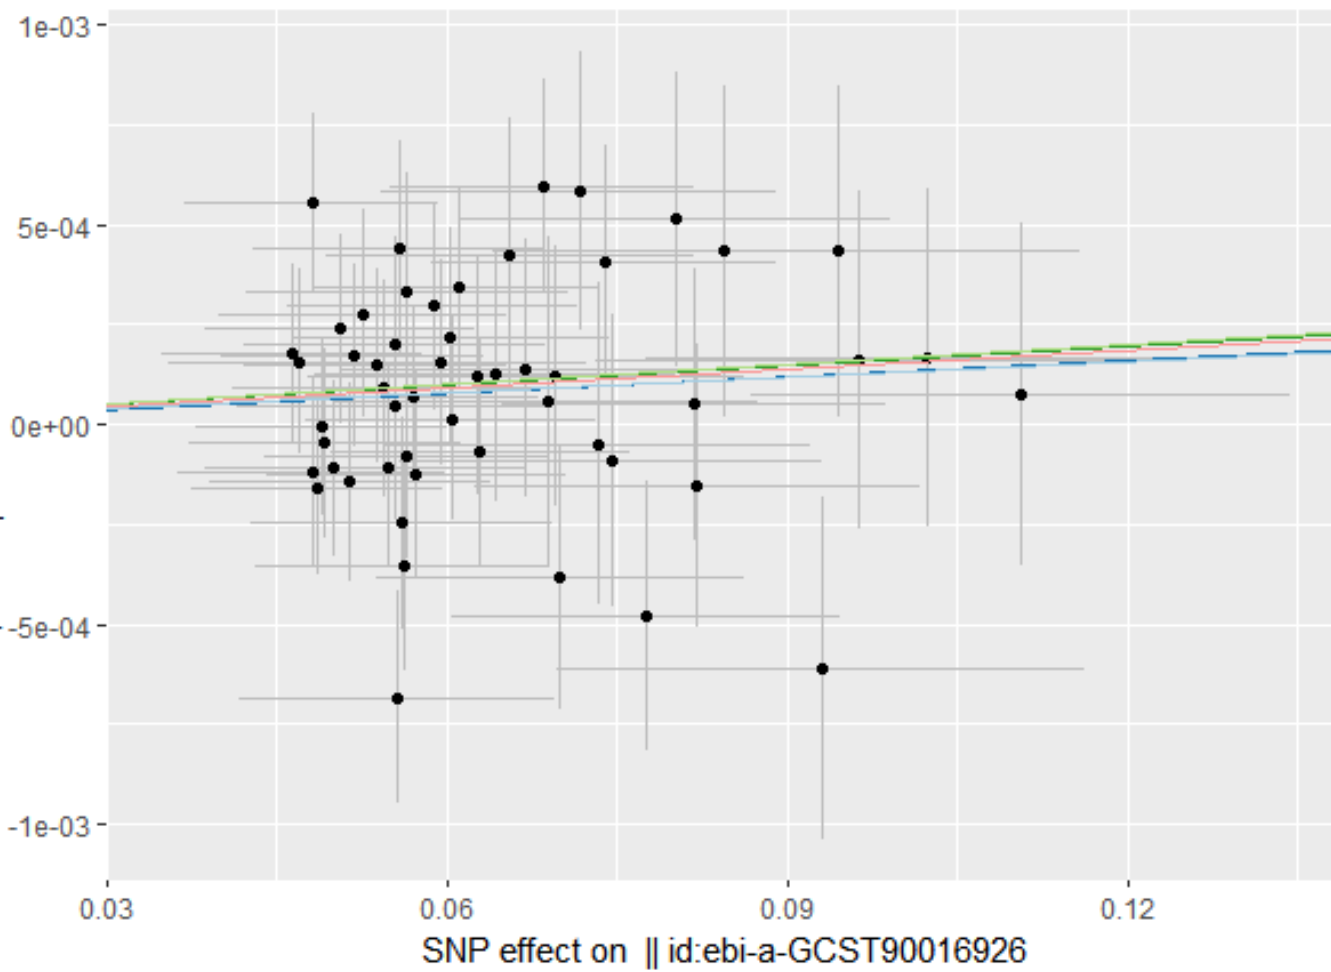



**Figure 105** Leave-one-out analysis, funnel plot, MR effect size and scatter plot for gut microbiota abundance (family Family XIII id.1957) on diverticular disease

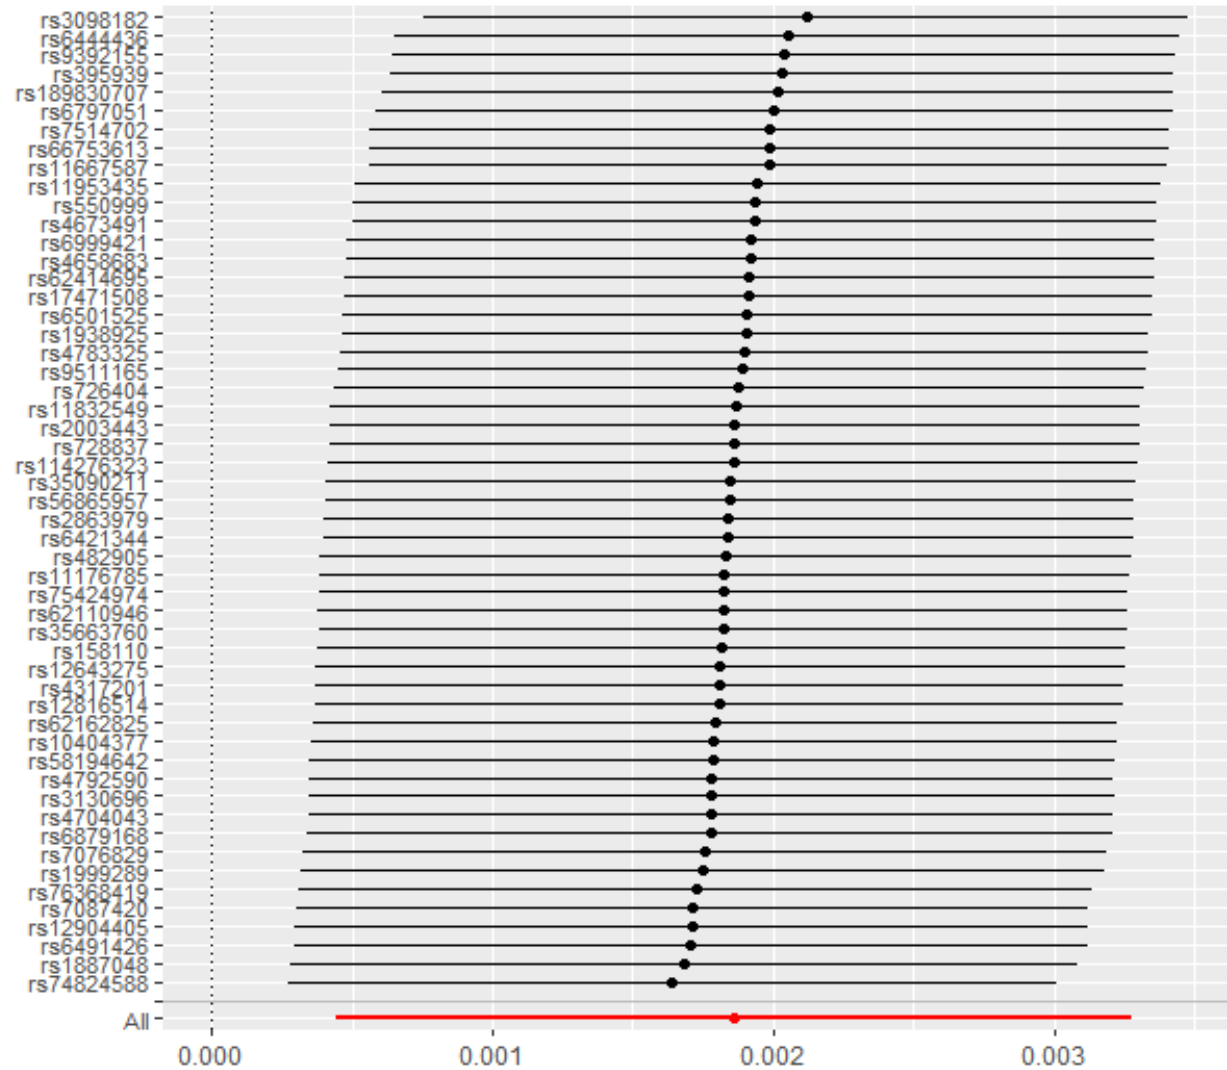

MR leave-one-out sensitivity analysis for  
 ' || id:ebi-a-GCST90016939' on 'Non-cancer illness code, self-reported: diverticular disease/diverticulitis || id:ukb-b-14'

MR Method

- Inverse variance weighted
- MR Egger

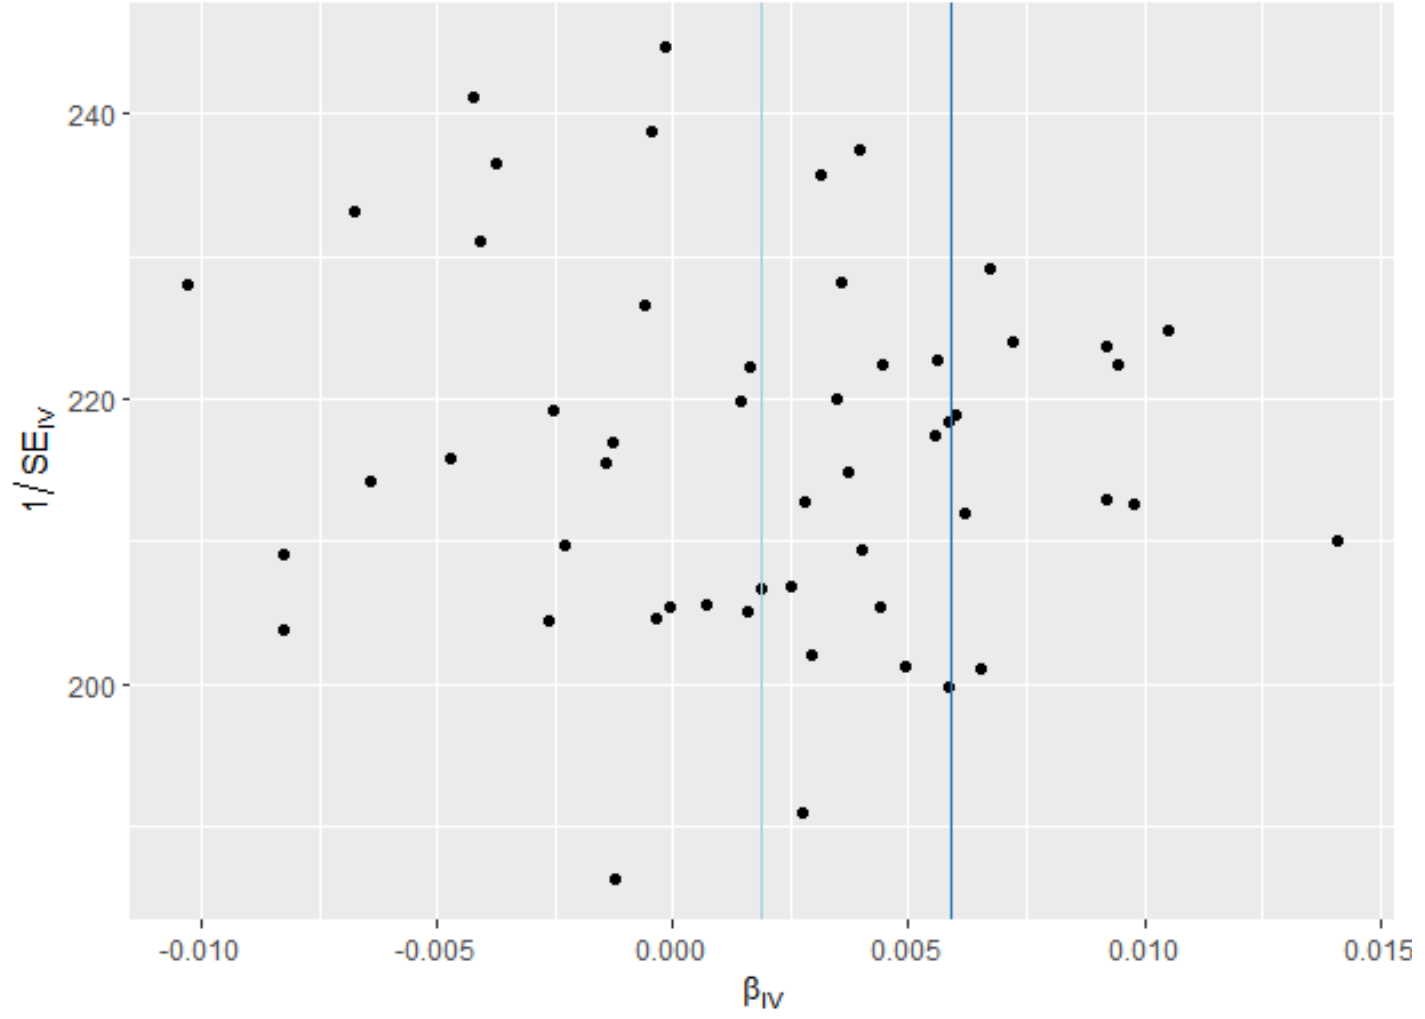

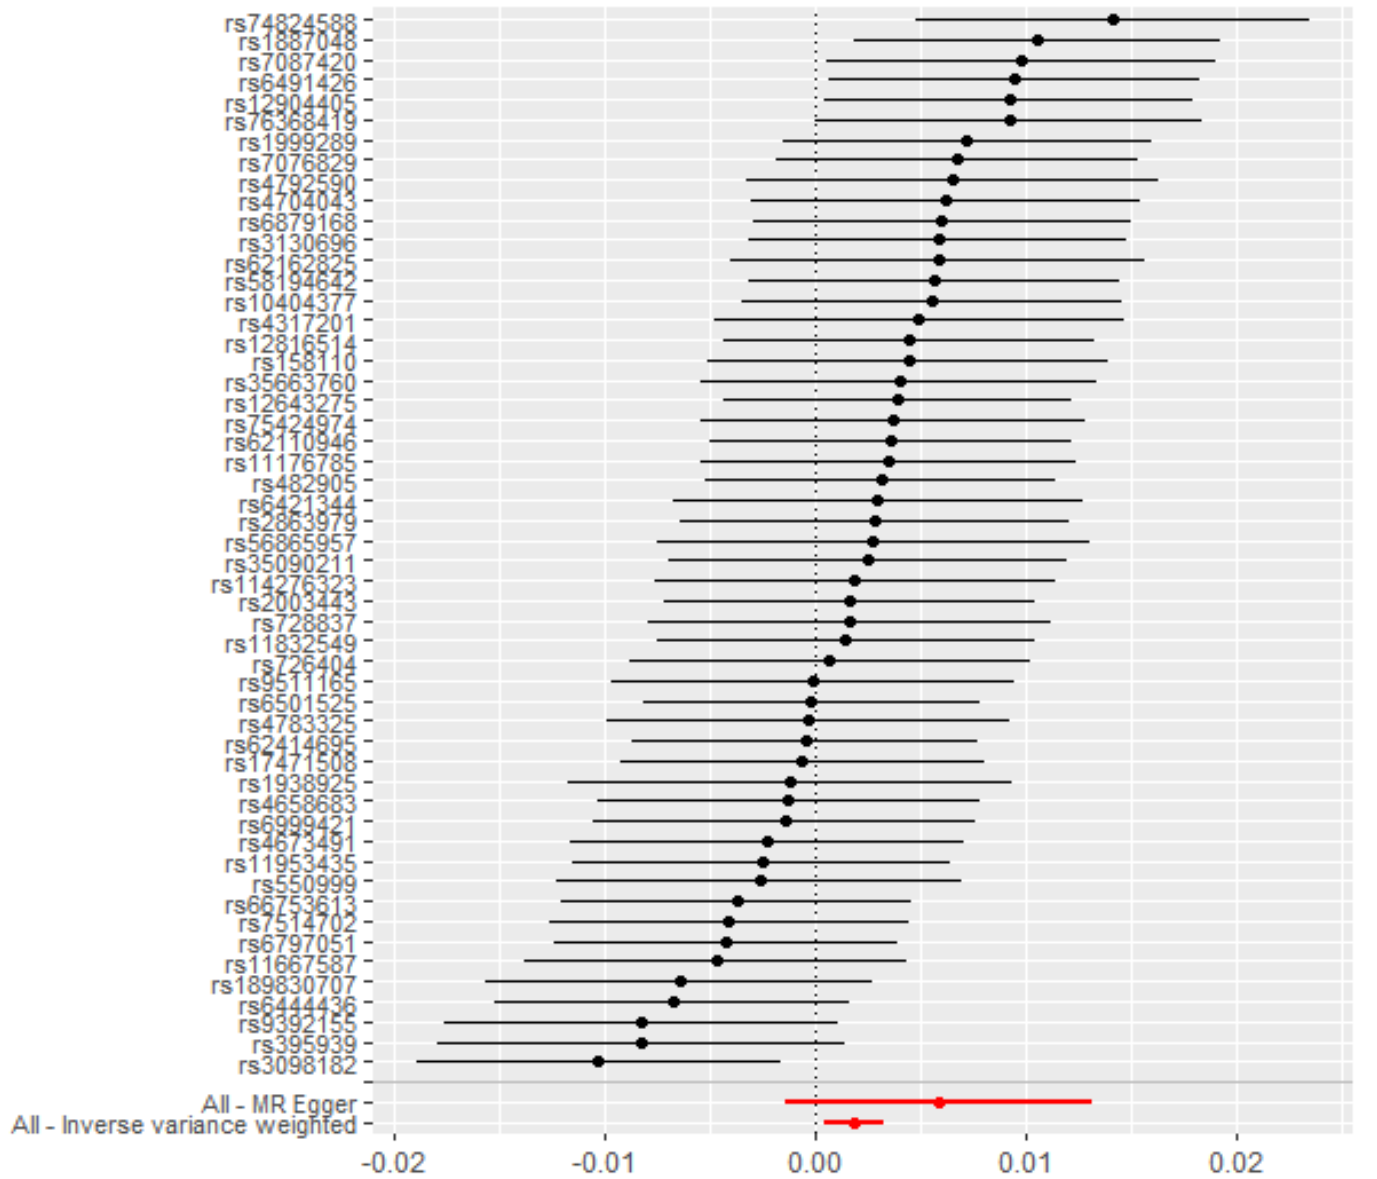

' || id:ebi-a-GCST90016939' on 'Non-cancer illness code, self-reported: diverticular disease/diverticulitis' || id

Non-cancer illness code, self-reported: diverticular disease/diverticulitis || id:ukb-b-147

MR Test

- Inverse variance weighted
- MR Egger
- Simple mode
- Weighted median
- Weighted mode

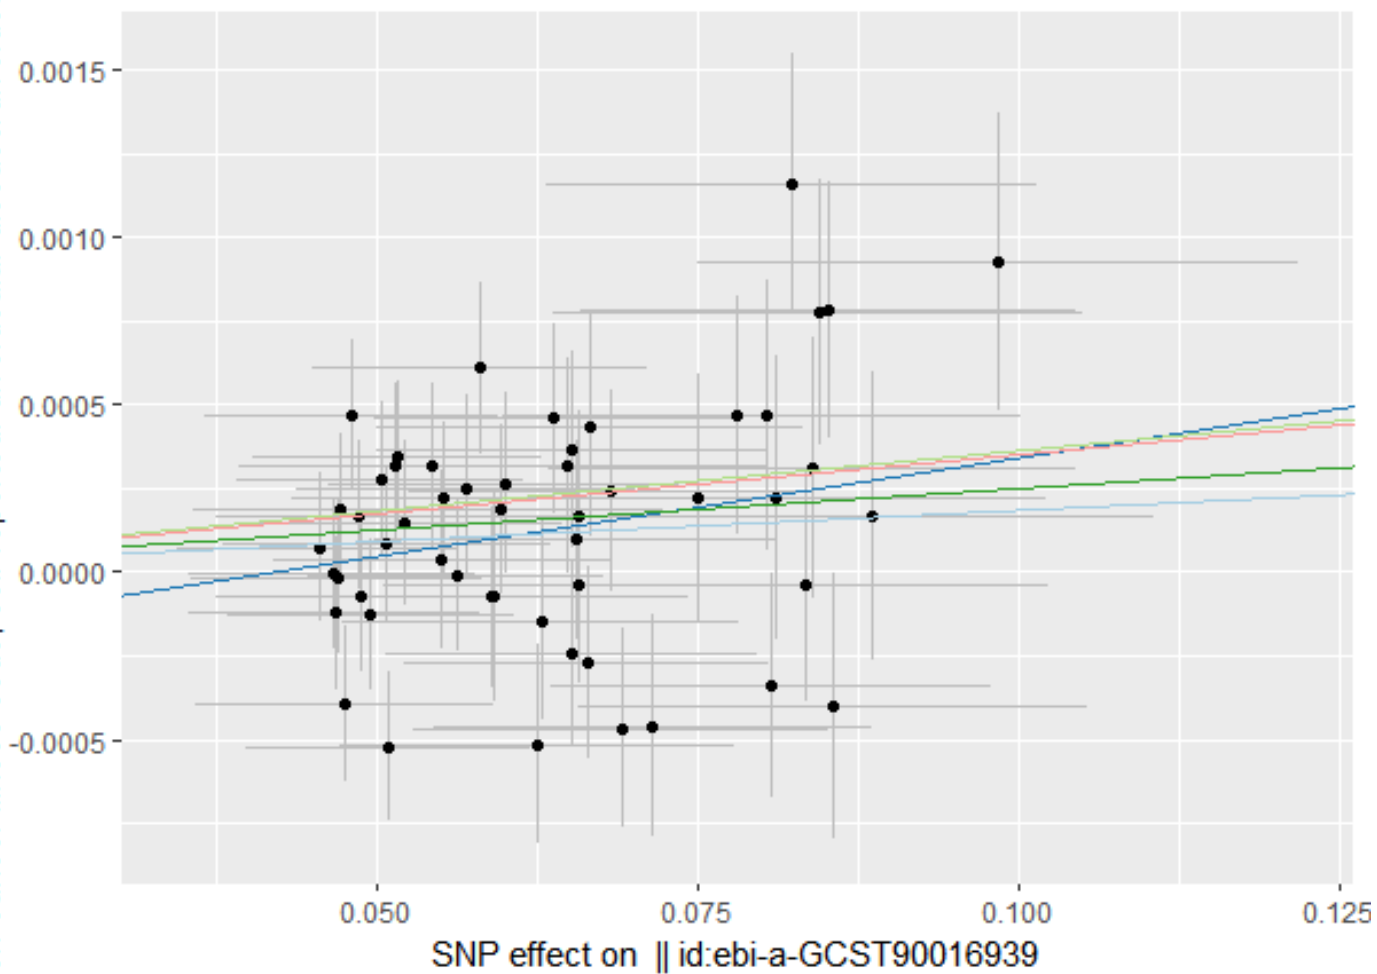

**Figure 106** Leave-one-out analysis, funnel plot, MR effect size and scatter plot for gut microbiota abundance (genus *Barnesiella* id.944) on diverticular disease

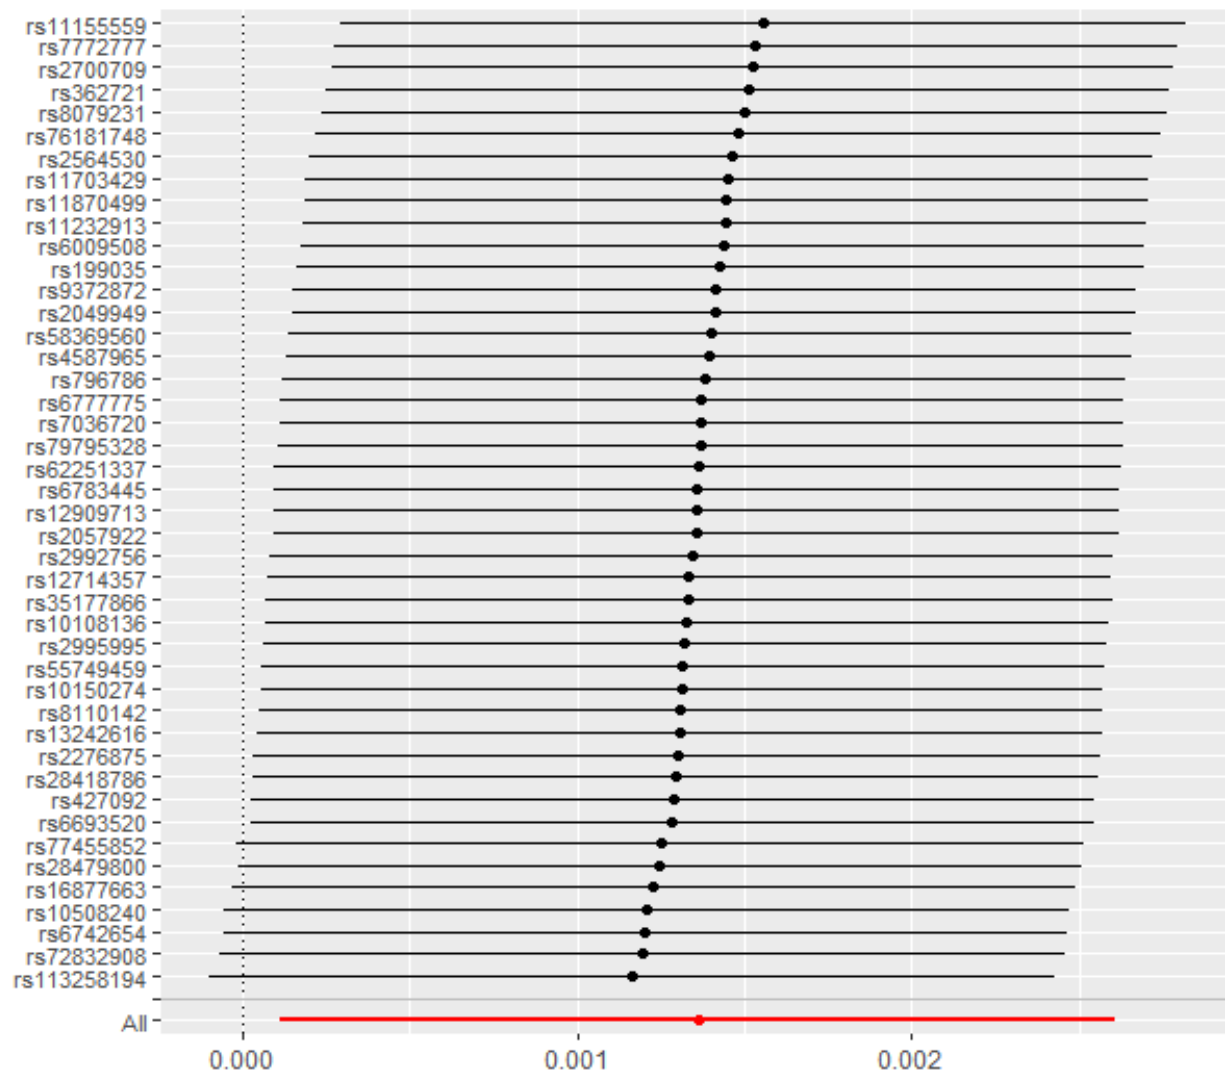

MR Method

- Inverse variance weighted
- MR Egger

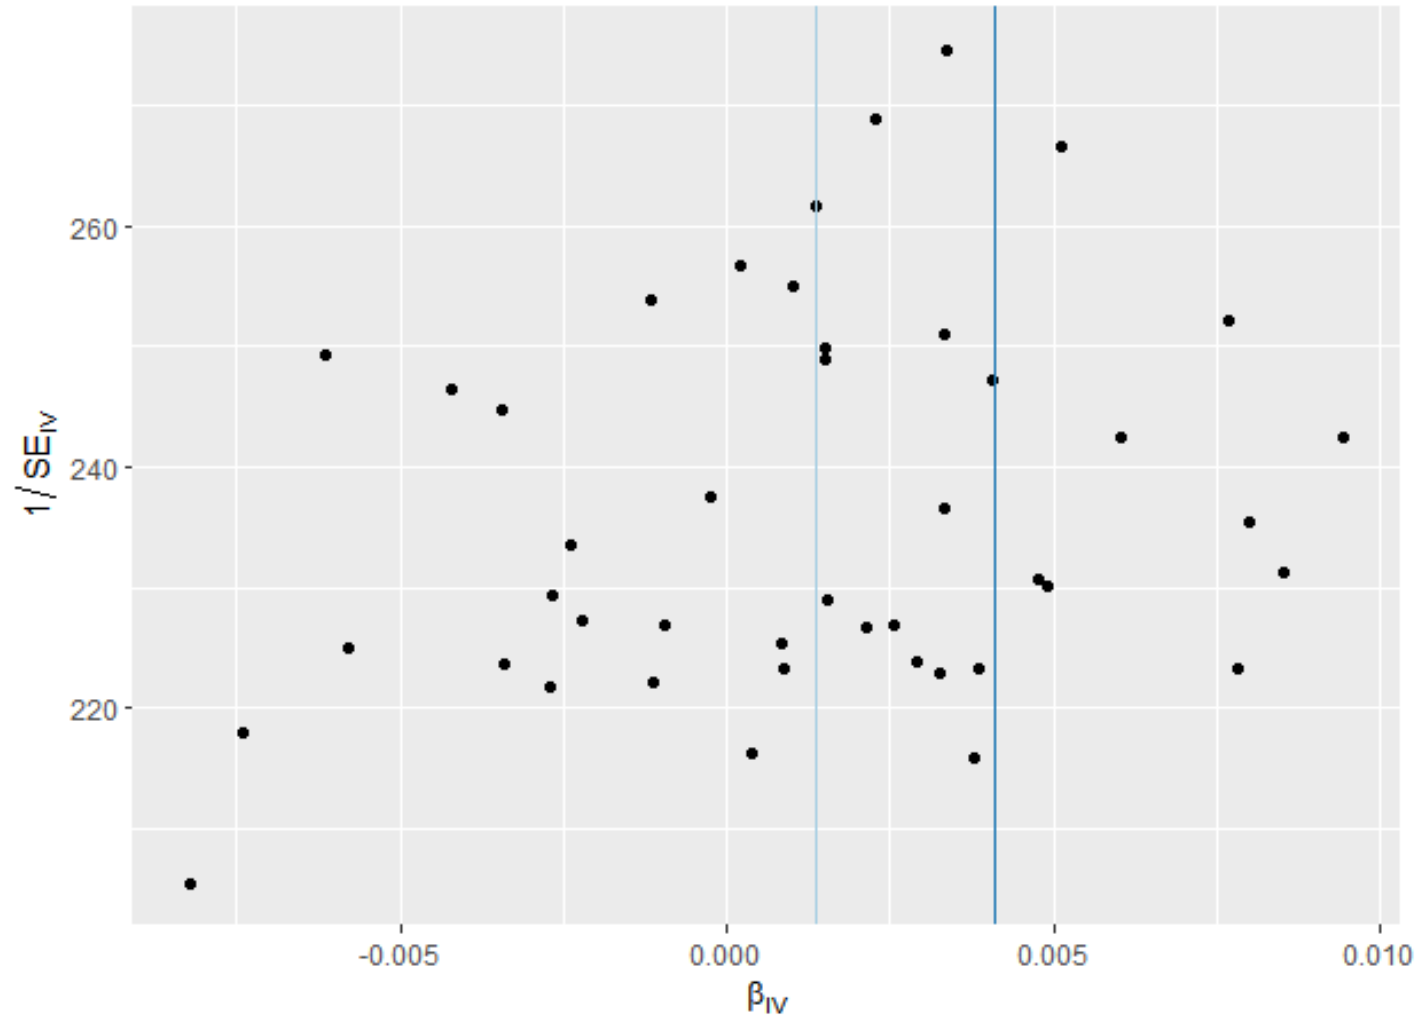

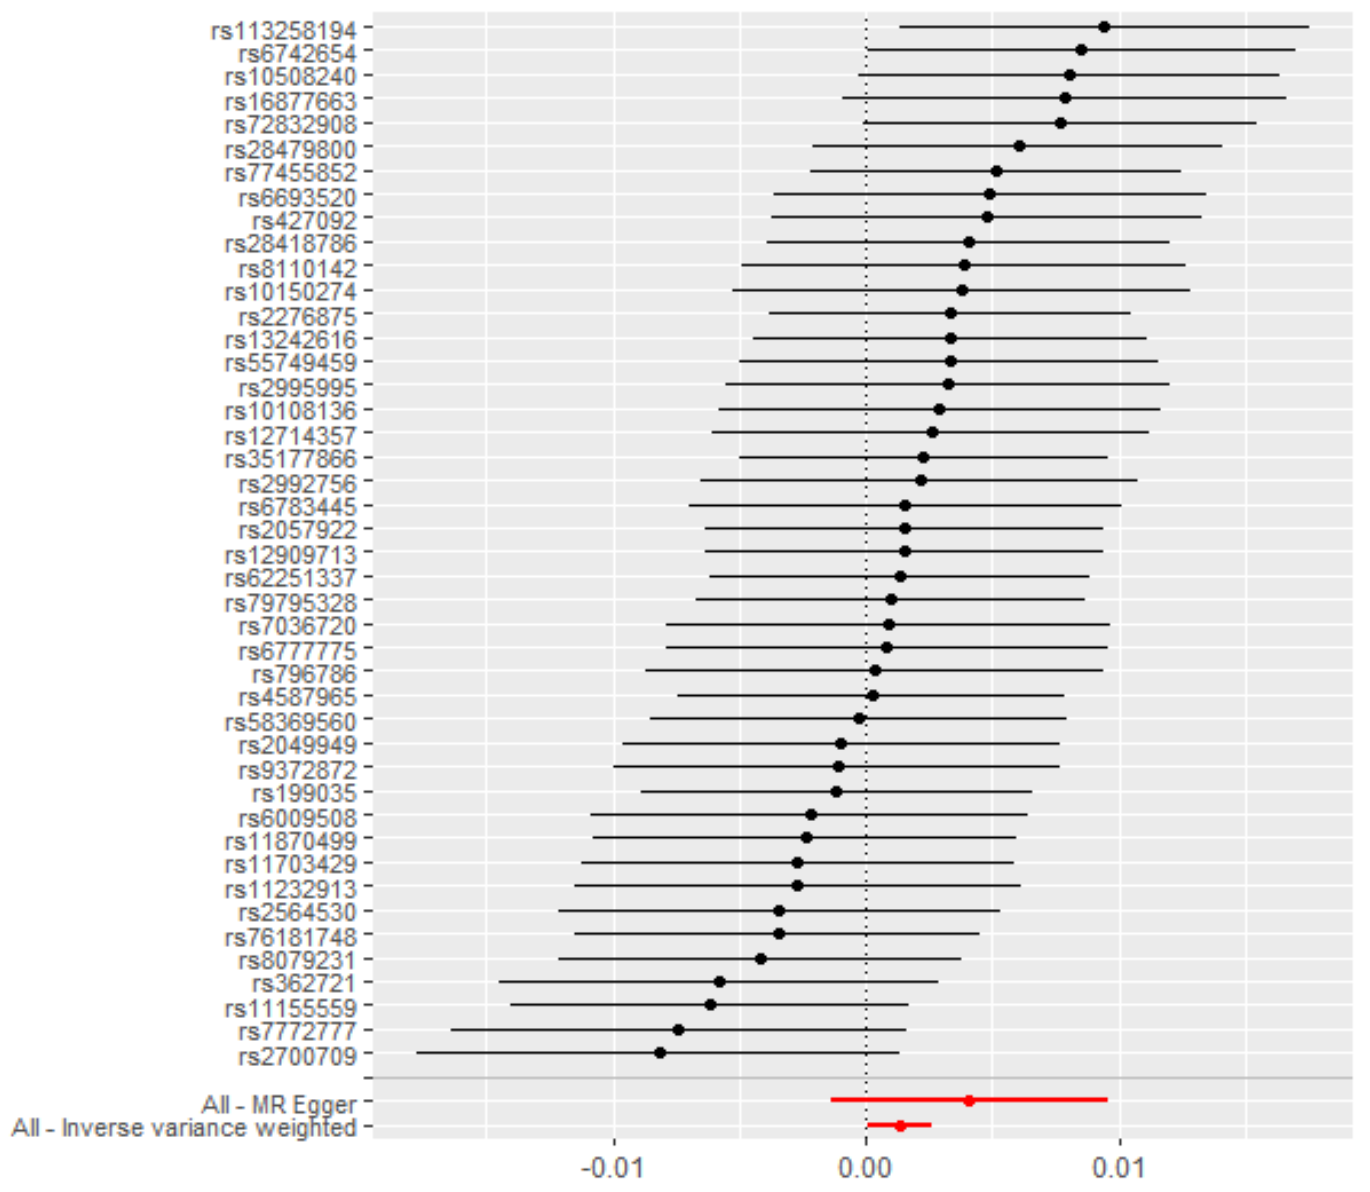

MR effect size for  
' || id:ebi-a-GCST90016969' on 'Non-cancer illness code, self-reported: diverticular disease/diverticulitis || id

non-cancer illness code, self-reported: diverticular disease/diverticulitis || id:ukb-b-147

MR Test

- Inverse variance weighted
- MR Egger
- Simple mode
- Weighted median
- Weighted mode

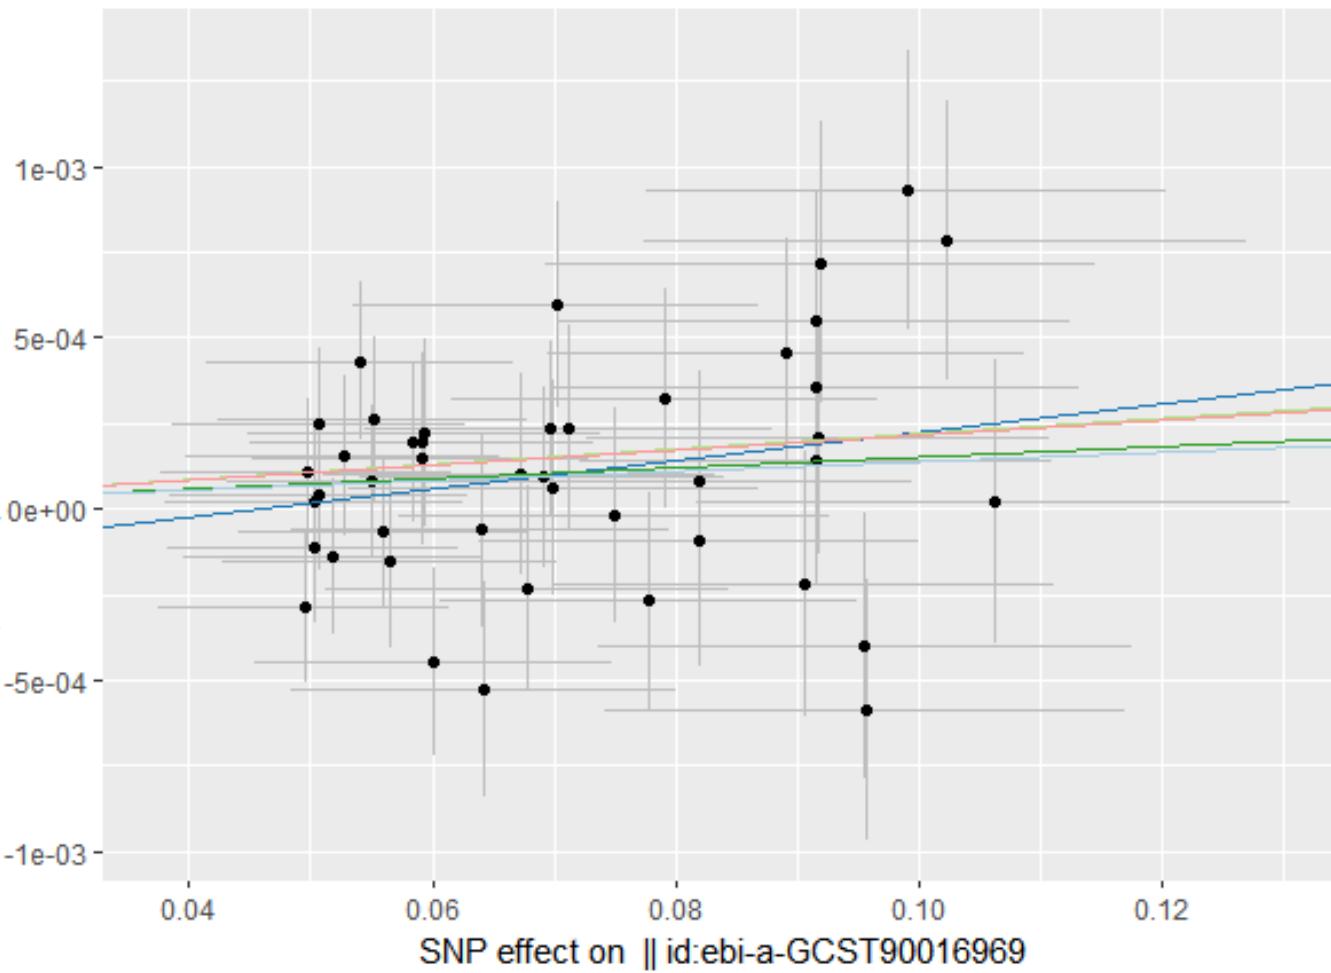



**Figure 107** Leave-one-out analysis, funnel plot, MR effect size and scatter plot for gut microbiota abundance (genus *Eubacterium xylanophilum* group id.14375) on diverticular disease

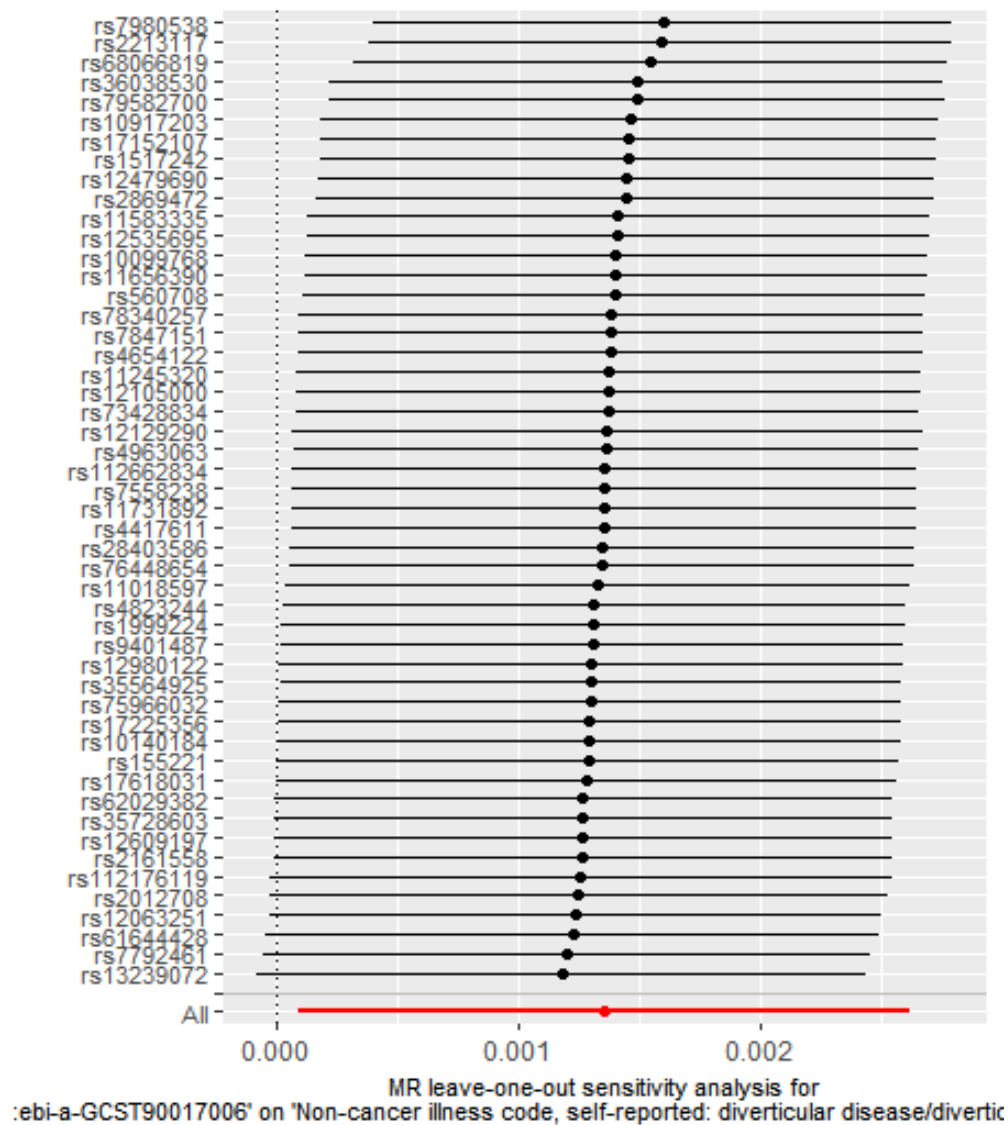

MR Method

- Inverse variance weighted
- MR Egger

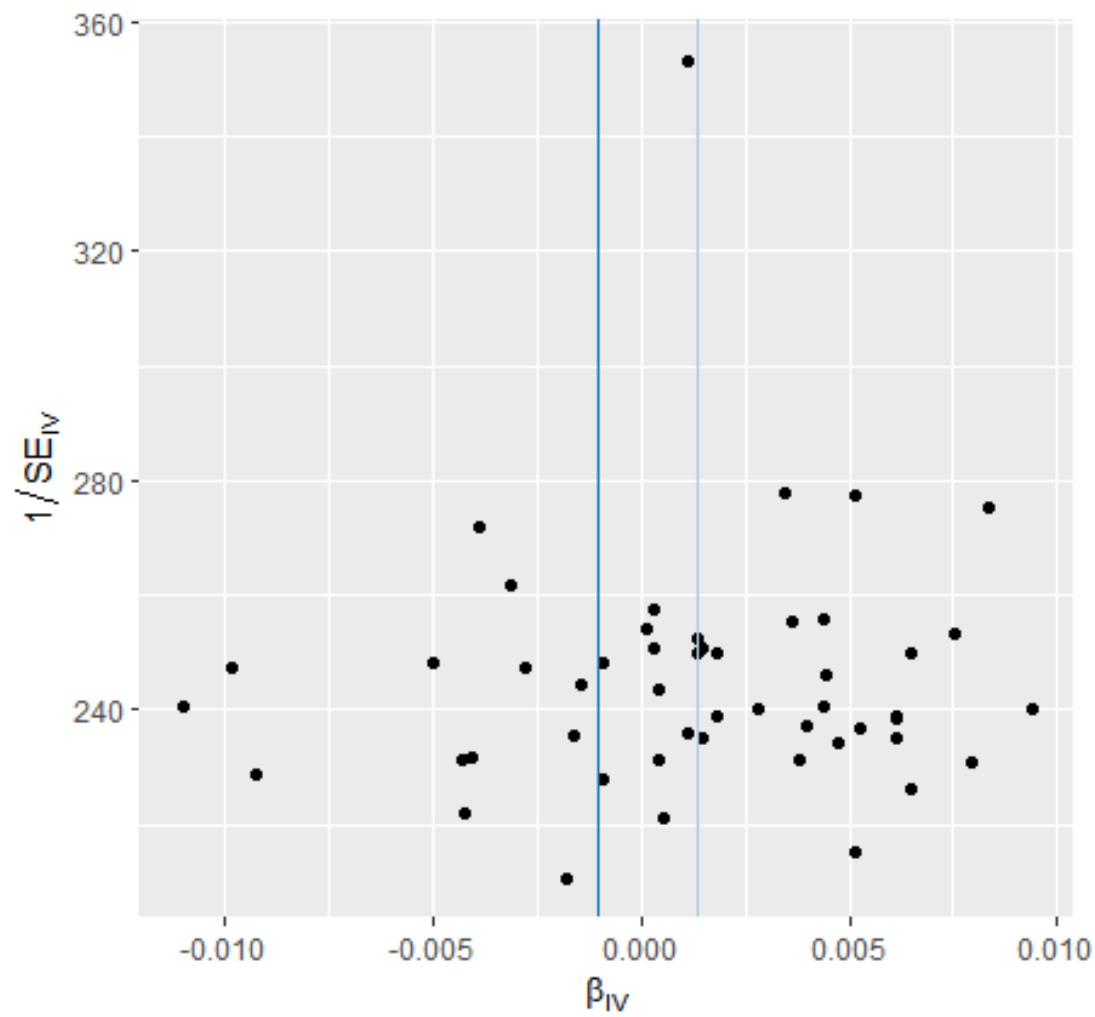

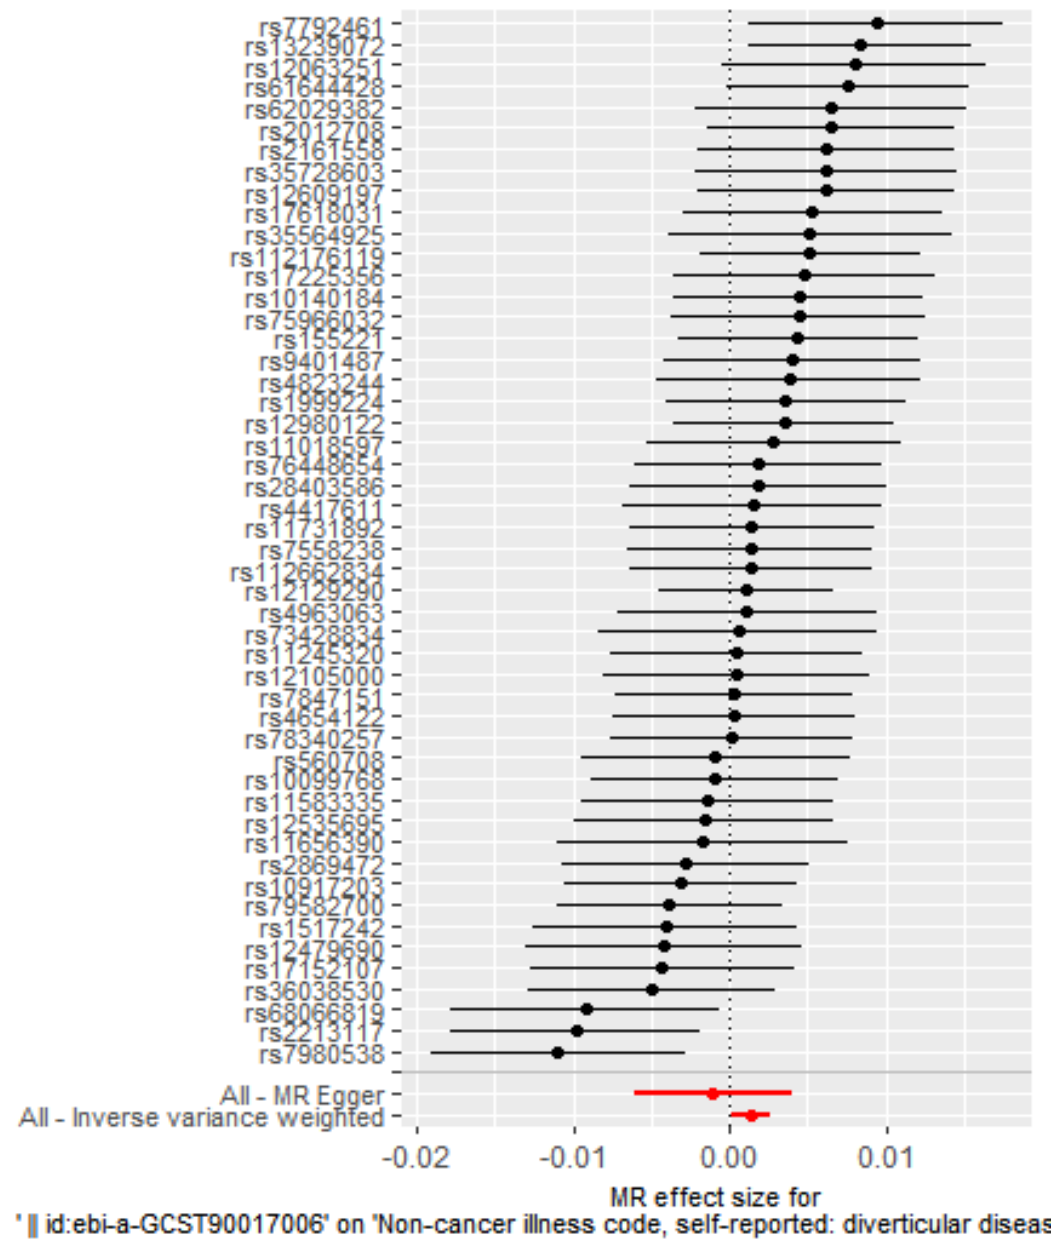

n-cancer illness code, self-reported: diverticular disease/diverticulitis || id:ukb-b-1

MR Test

- Inverse variance weighted
- MR Egger
- Simple mode
- Weighted median
- Weighted mode

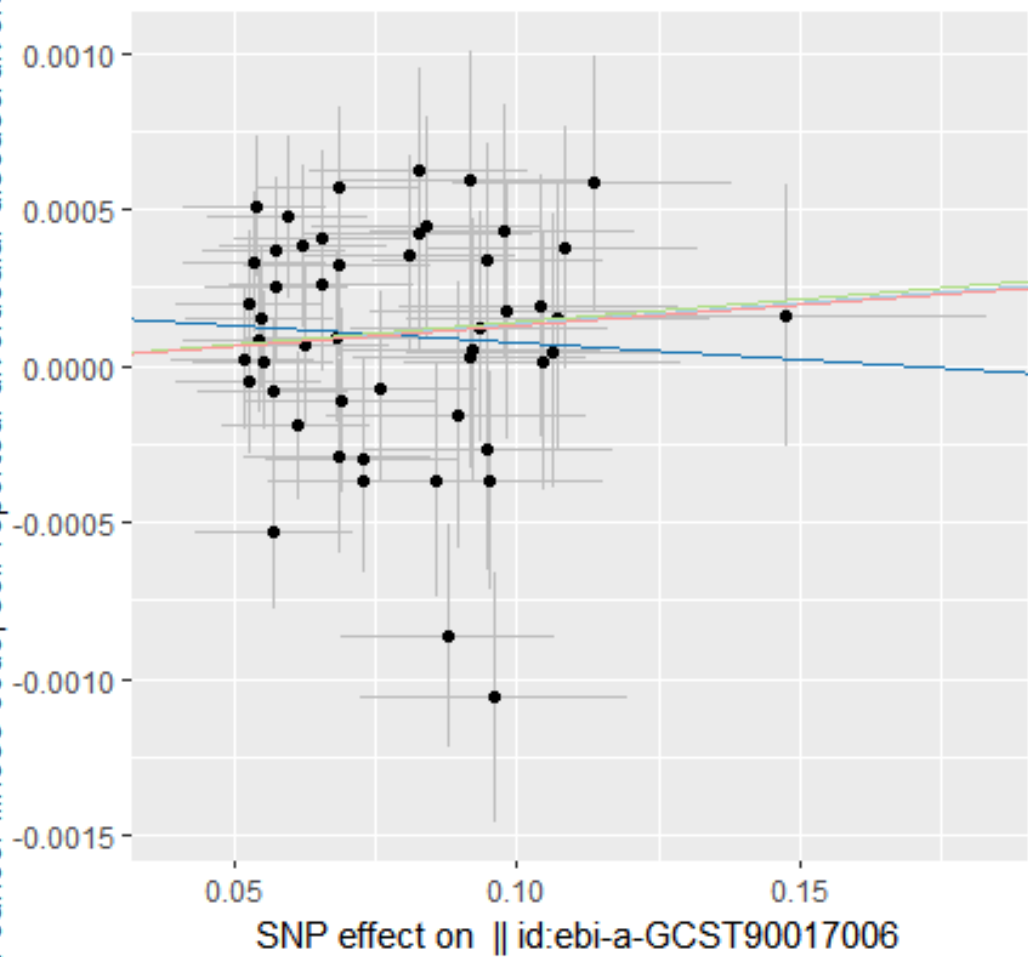

**Figure 108** Leave-one-out analysis, funnel plot, MR effect size and scatter plot for gut microbiota abundance (genus Ruminococcus2 id.11374) on diverticular disease

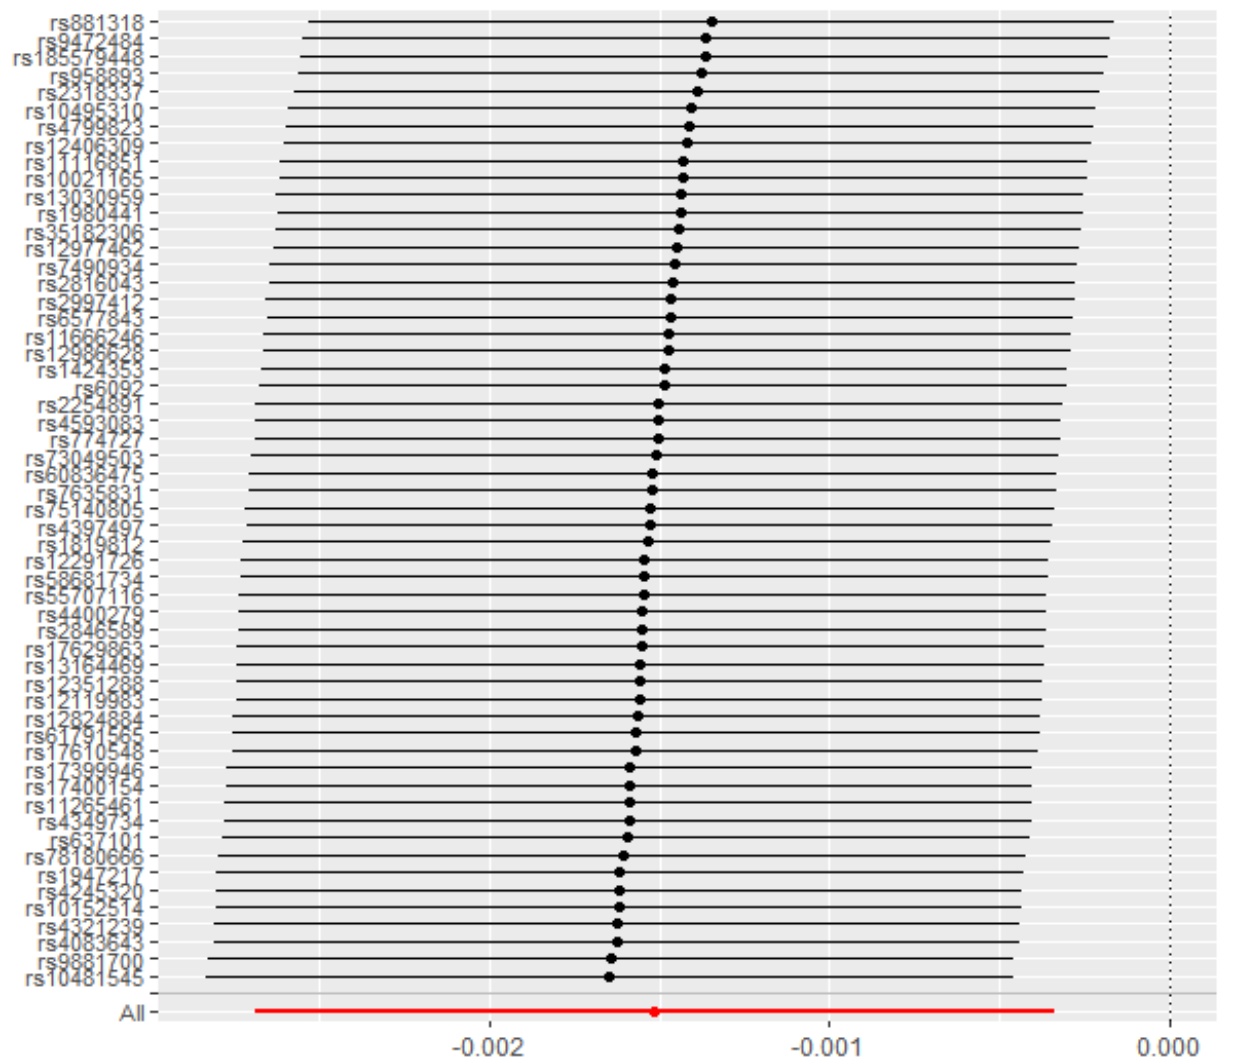

MR leave-one-out sensitivity analysis for  
' || id:ebi-a-GCST90017063' on 'Non-cancer illness code, self-reported: diverticular disease/diverticulitis || id:ukb-b-14'

MR Method

- Inverse variance weighted
- MR Egger

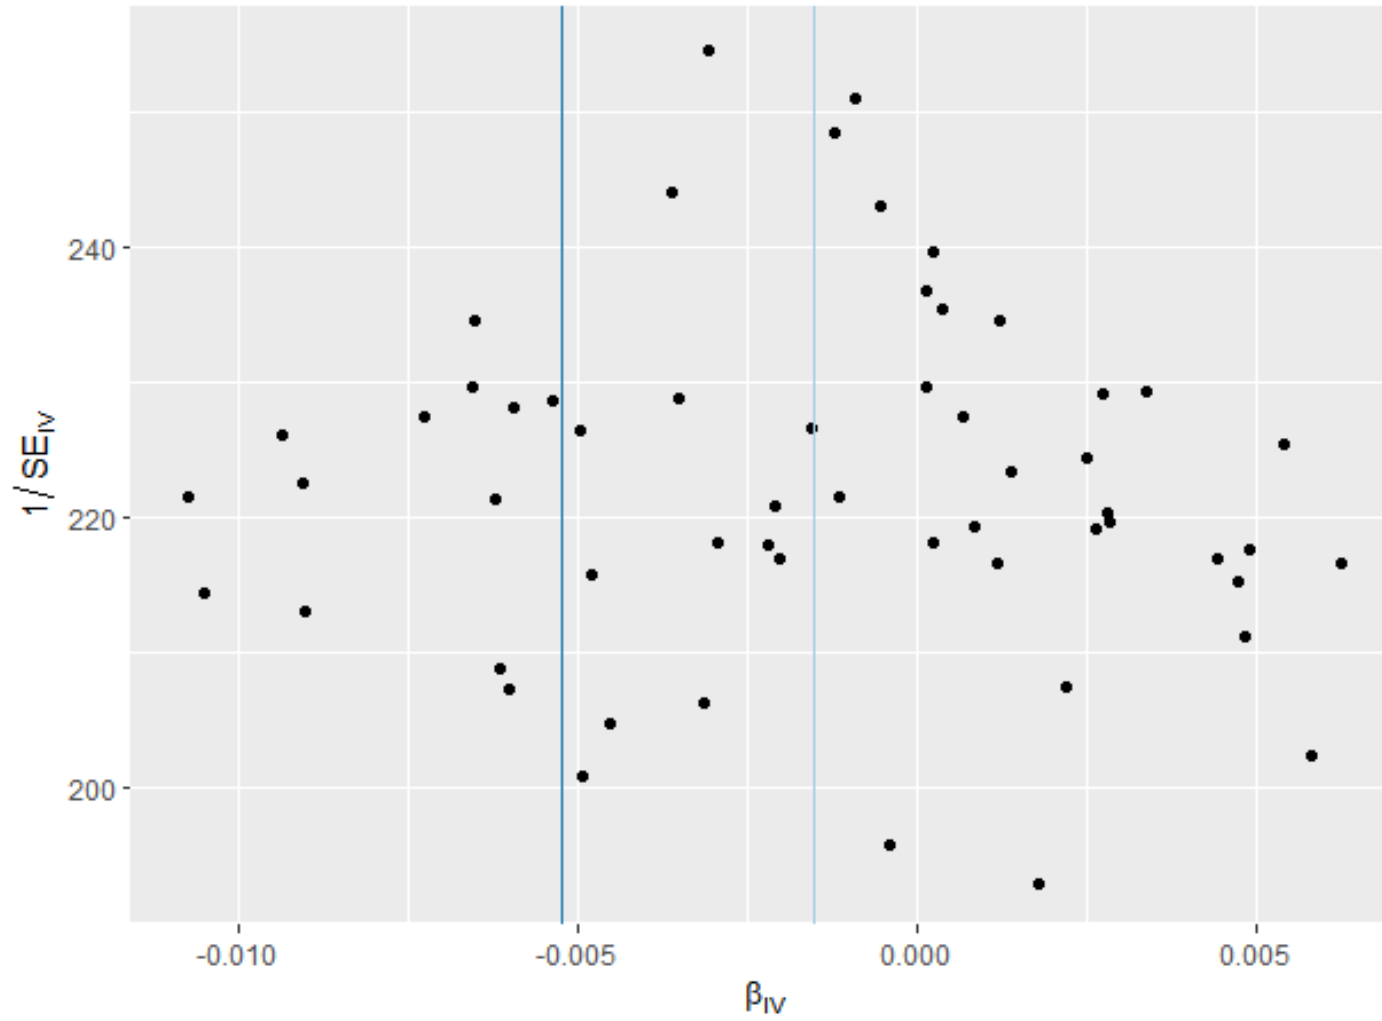

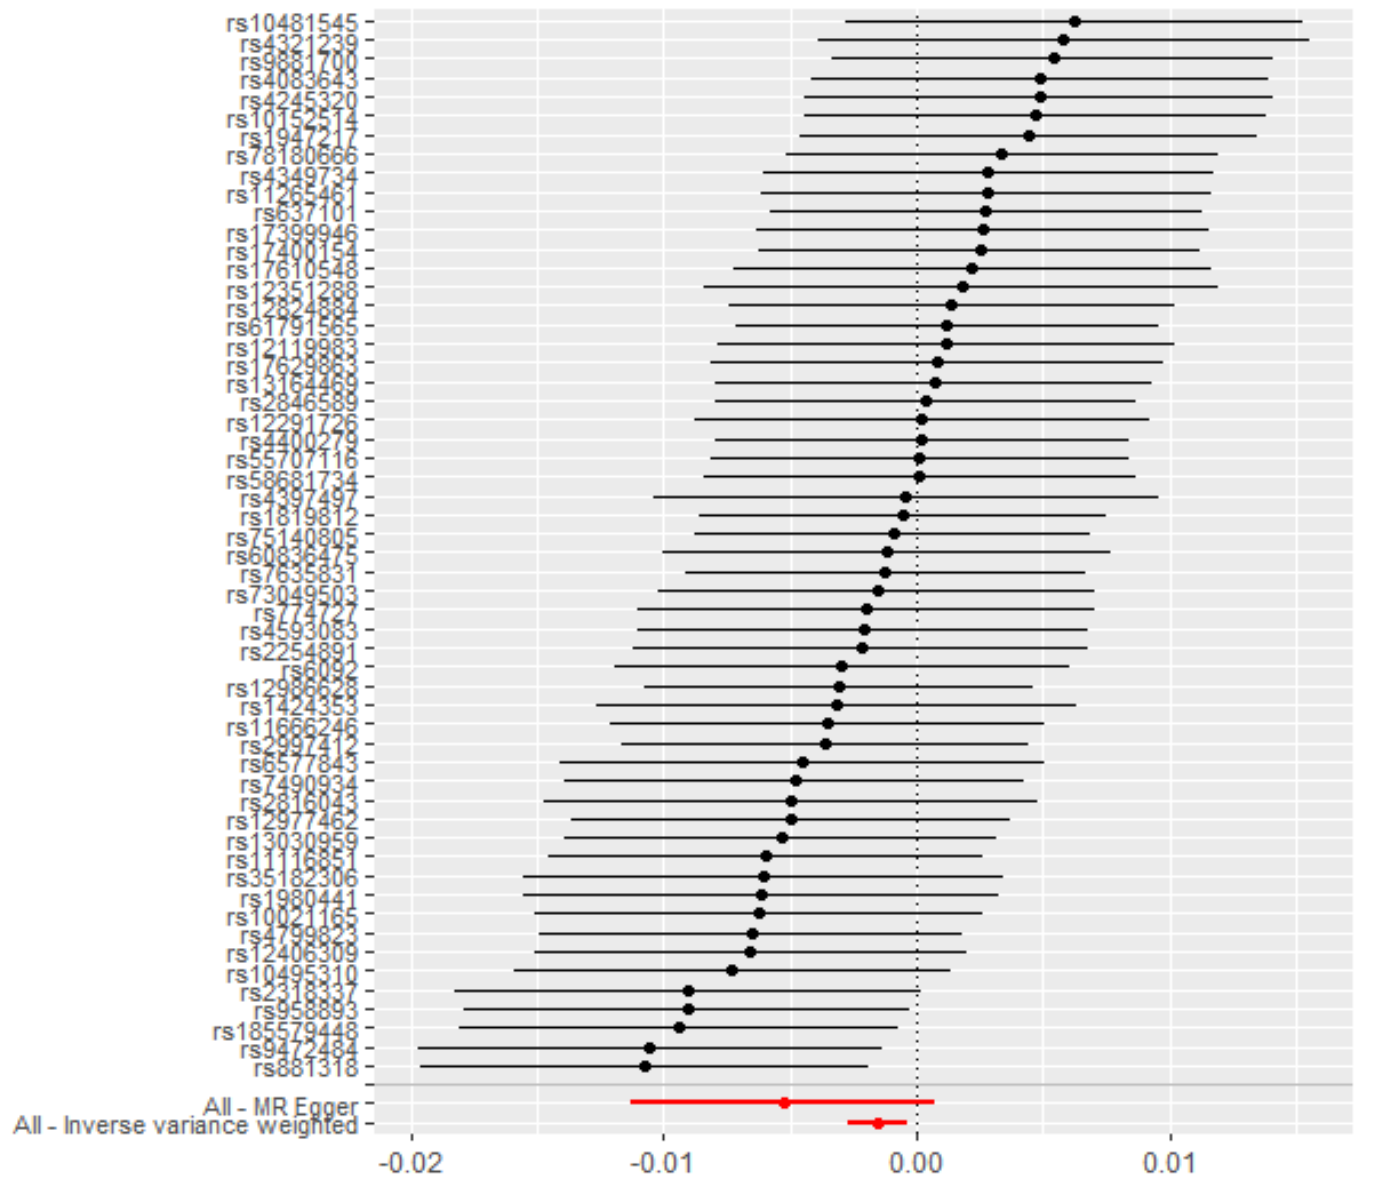

MR effect size for ' || id:ebi-a-GCST90017063' on 'Non-cancer illness code, self-reported: diverticular disease/diverticulitis || id

Non-cancer illness code, self-reported: diverticular disease/diverticulitis || id:ukb-b-147

MR Test

- Inverse variance weighted
- MR Egger
- Simple mode
- Weighted median
- Weighted mode

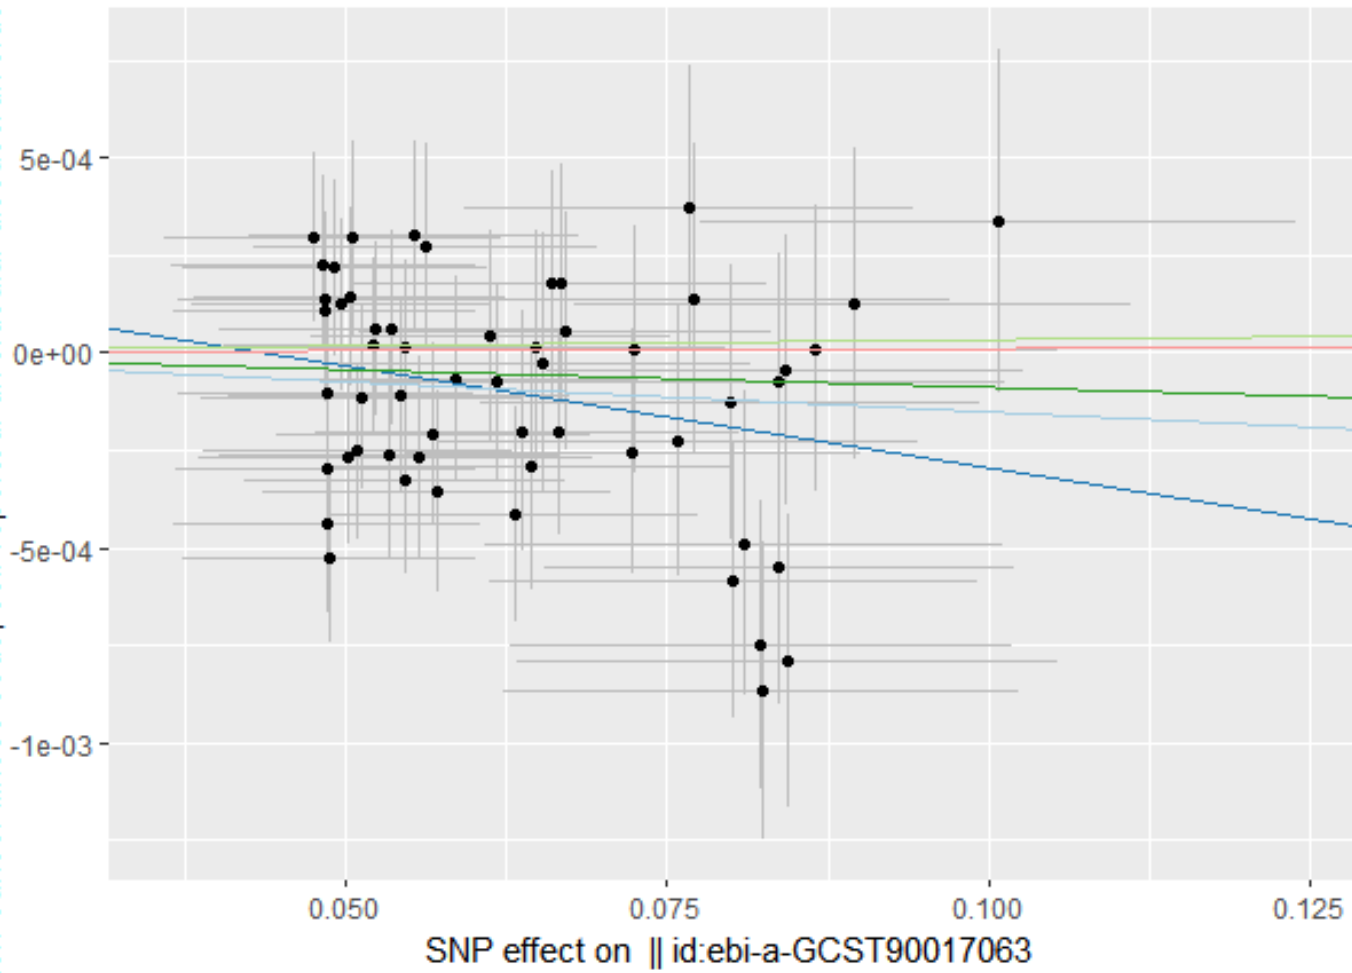



**Figure 109** Leave-one-out analysis, funnel plot, MR effect size and scatter plot for gut microbiota abundance (unknown genus id.1868) on diverticular disease

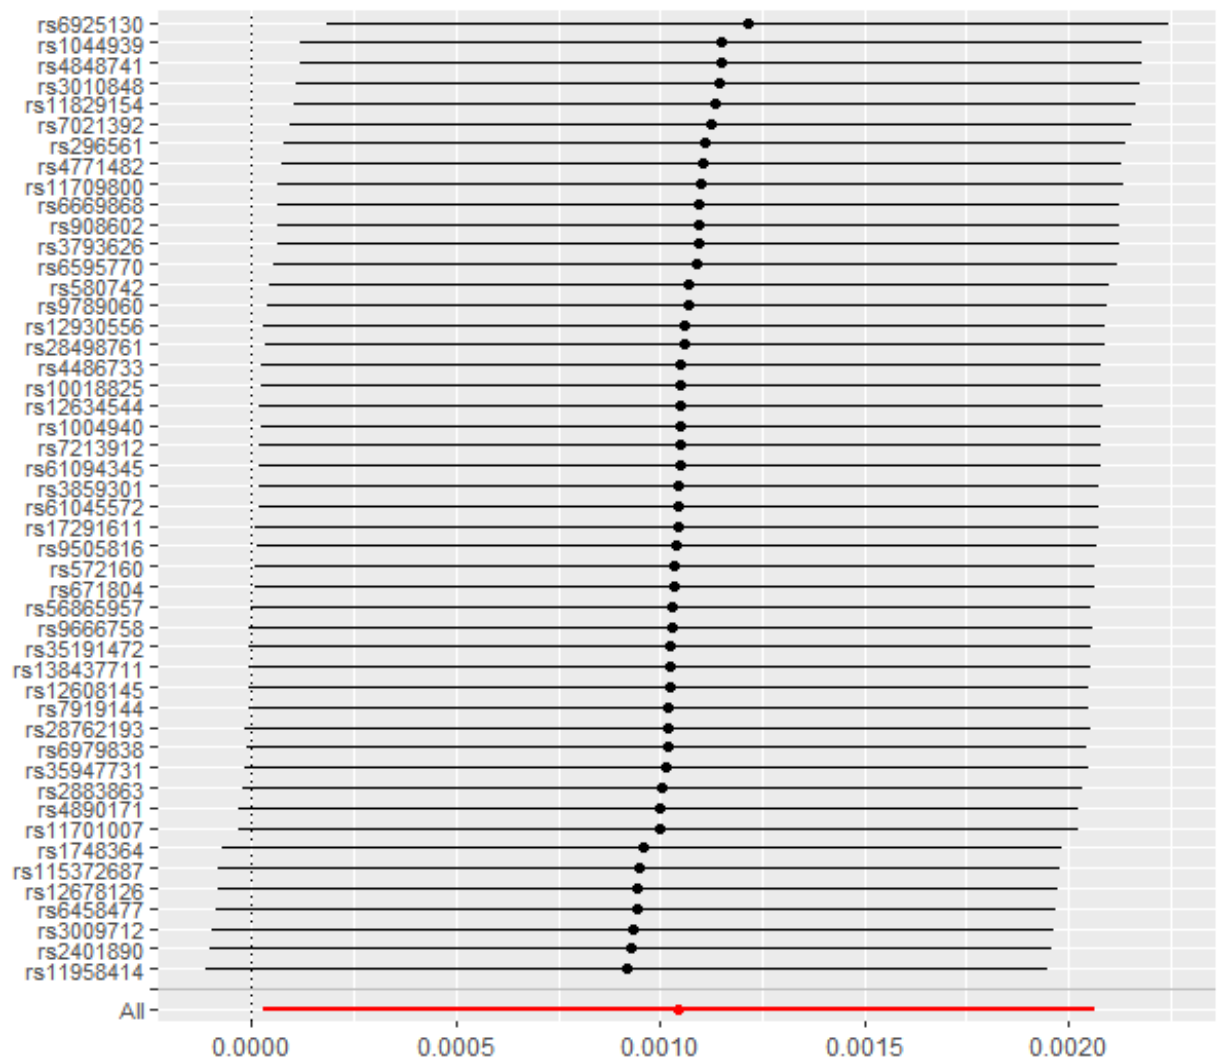

MR leave-one-out sensitivity analysis for ' || id:ebi-a-GCST90017081' on 'Non-cancer illness code, self-reported: diverticular disease/diverticulitis || id:ukb-b-14'

MR Method

- Inverse variance weighted
- MR Egger

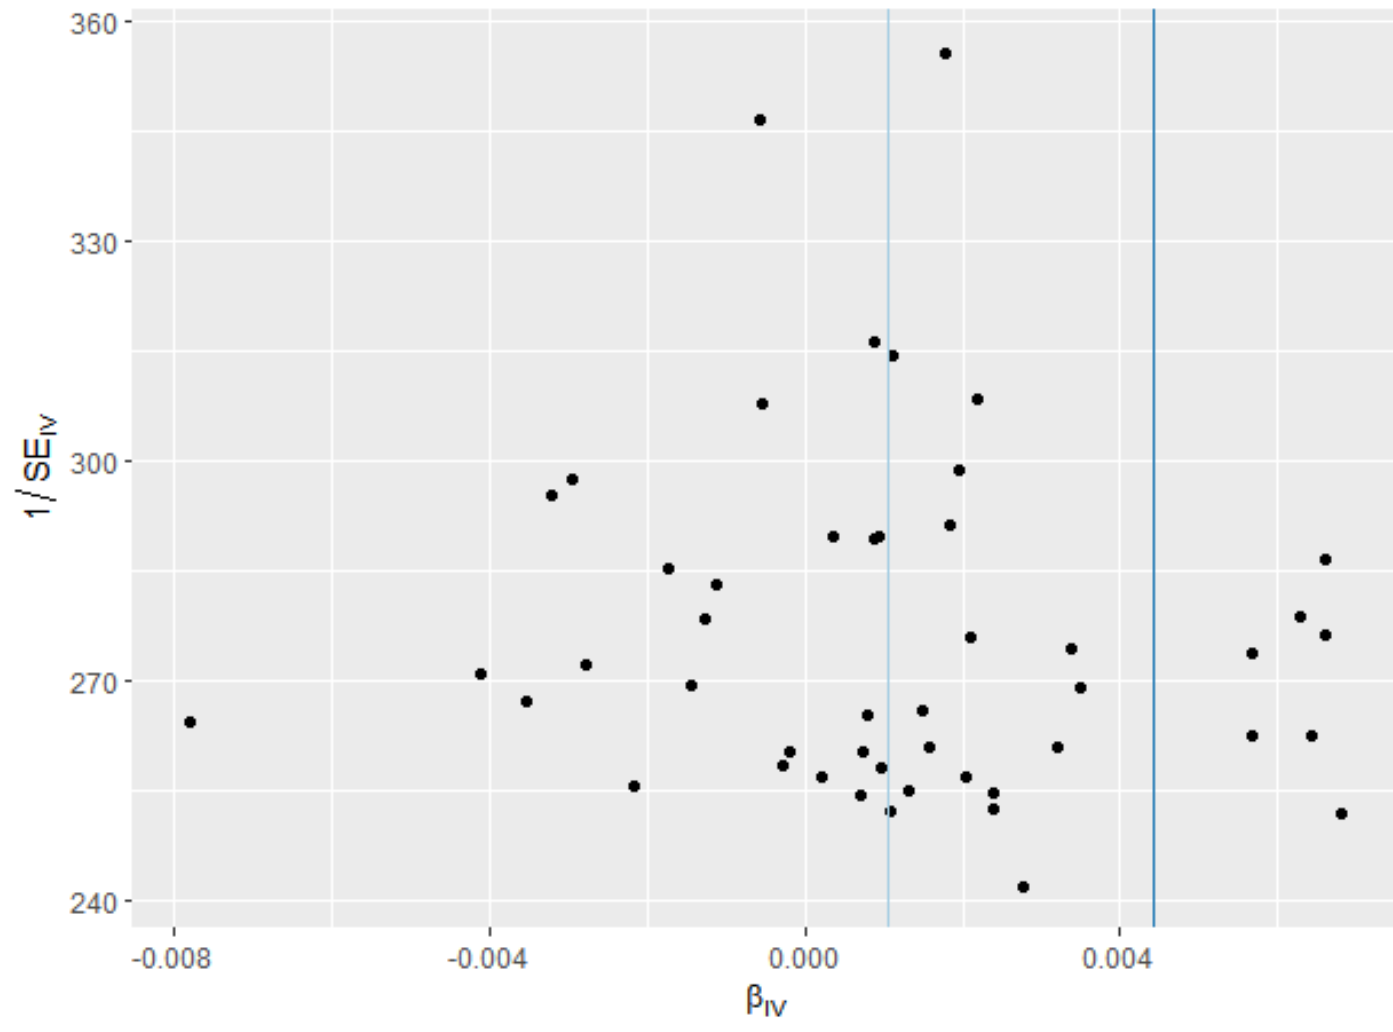

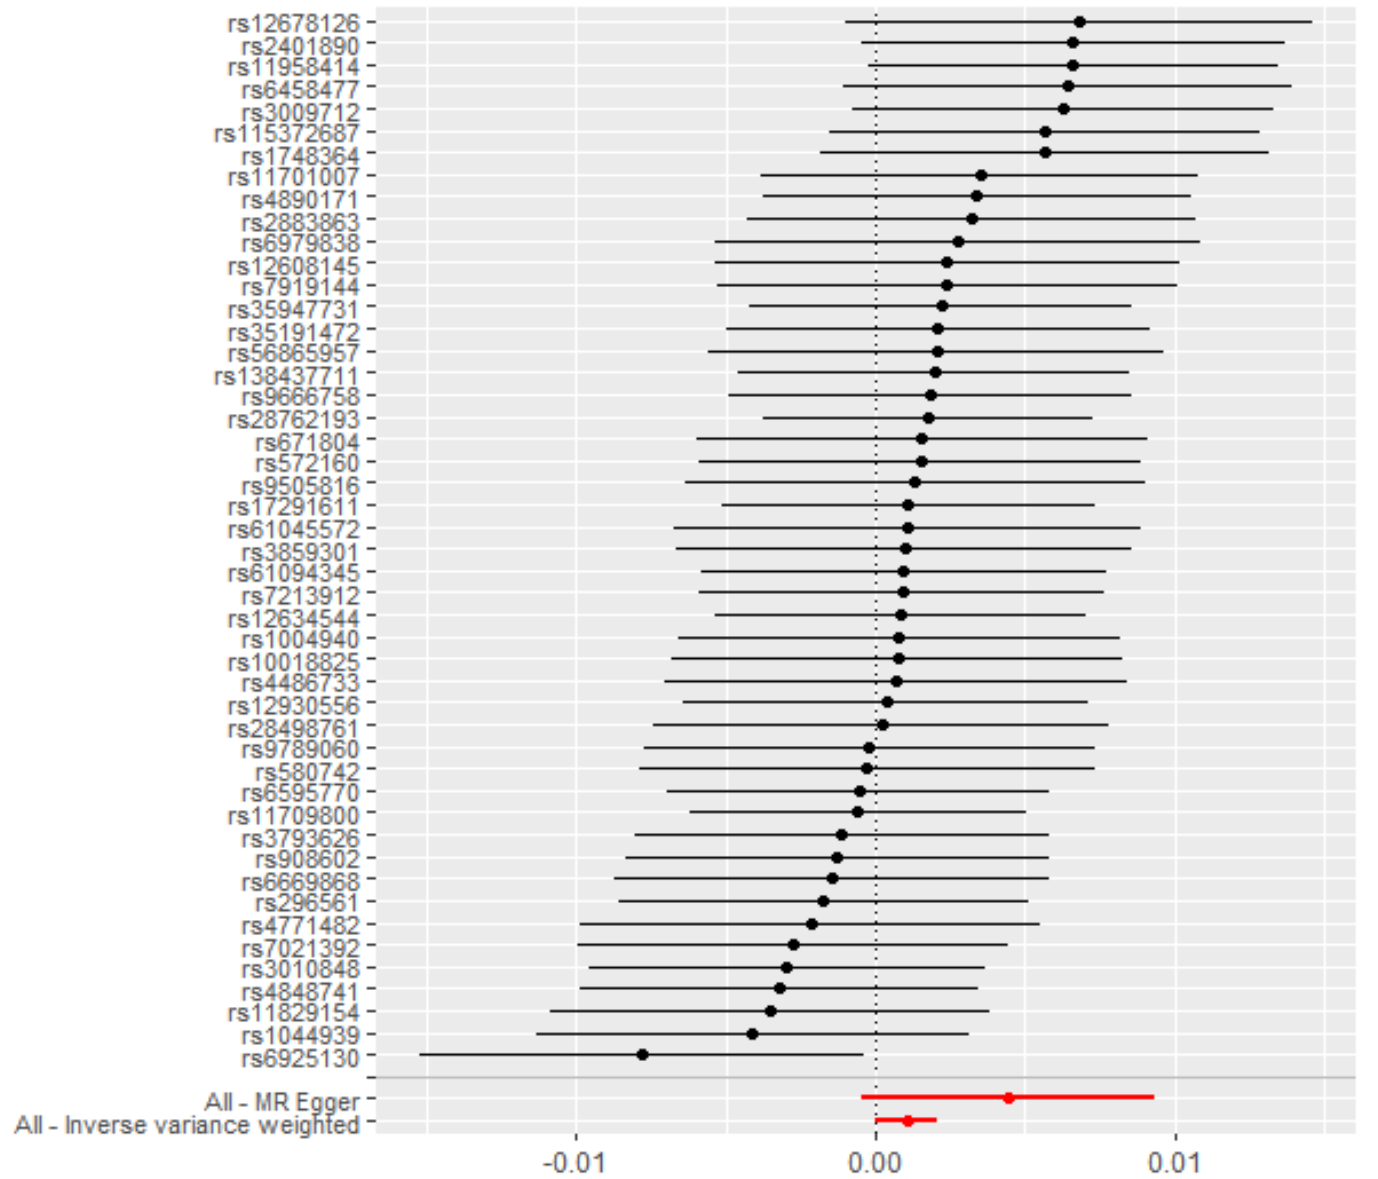

MR effect size for  
' || id:ebi-a-GCST90017081' on 'Non-cancer illness code, self-reported: diverticular disease/diverticulitis || id

non-cancer illness code, self-reported: diverticular disease/diverticulitis || id:ukb-b-147

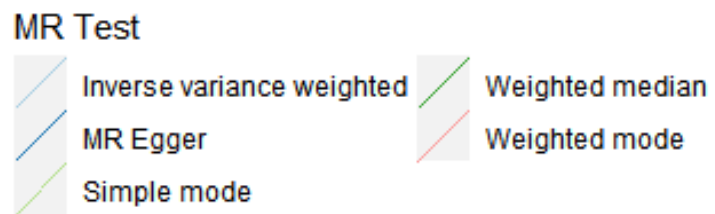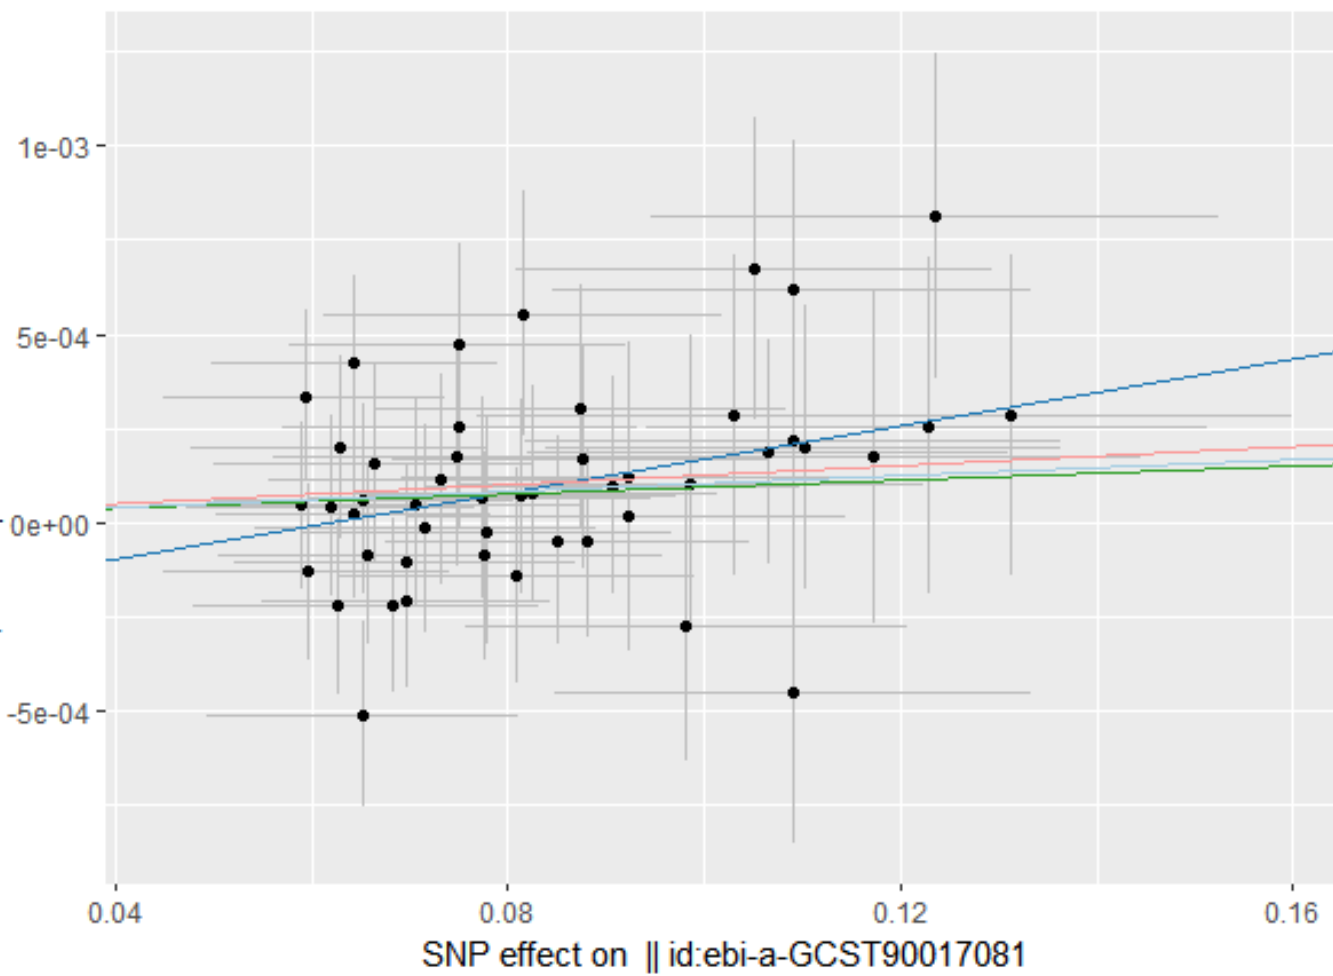

**Figure 110** Leave-one-out analysis, funnel plot, MR effect size and scatter plot for gut microbiota abundance (unknown genus id.959) on diverticular disease

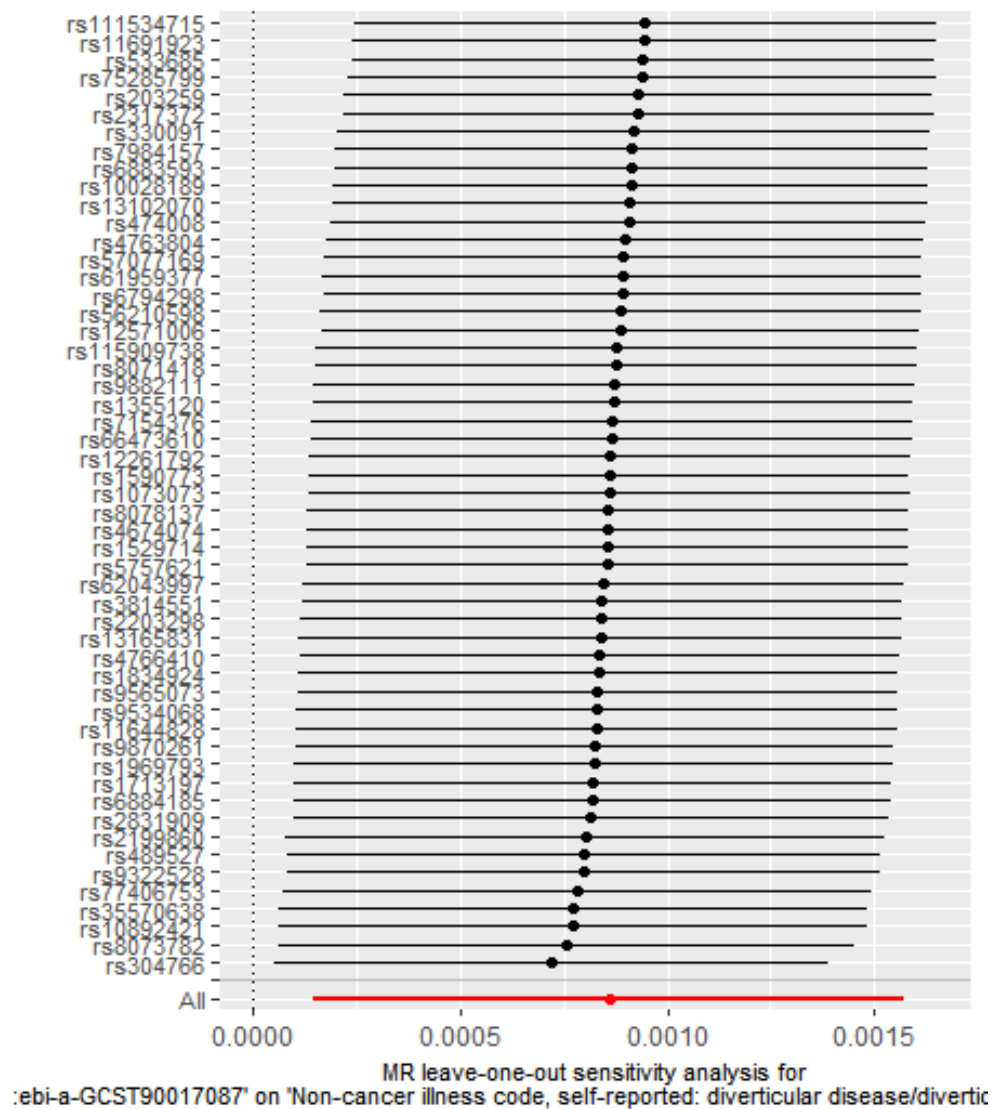

MR Method

- Inverse variance weighted
- MR Egger

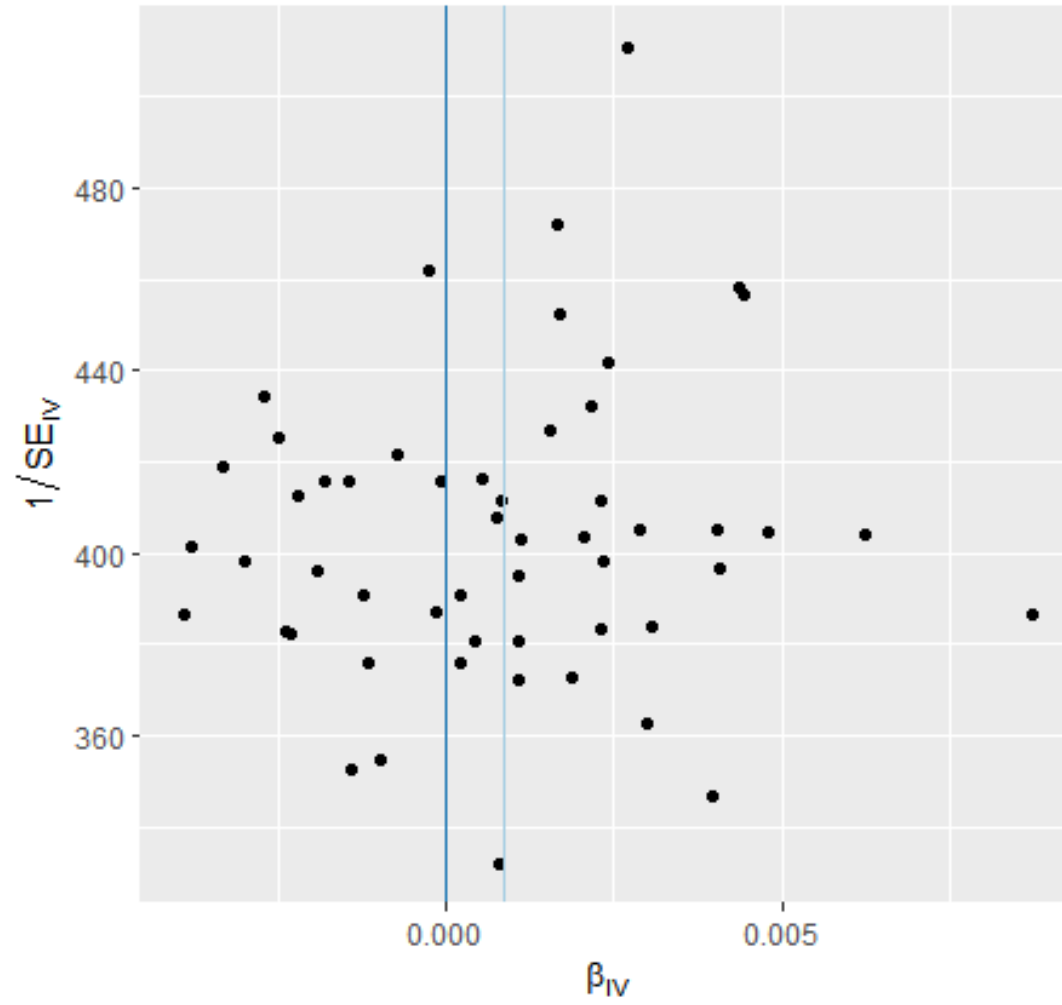

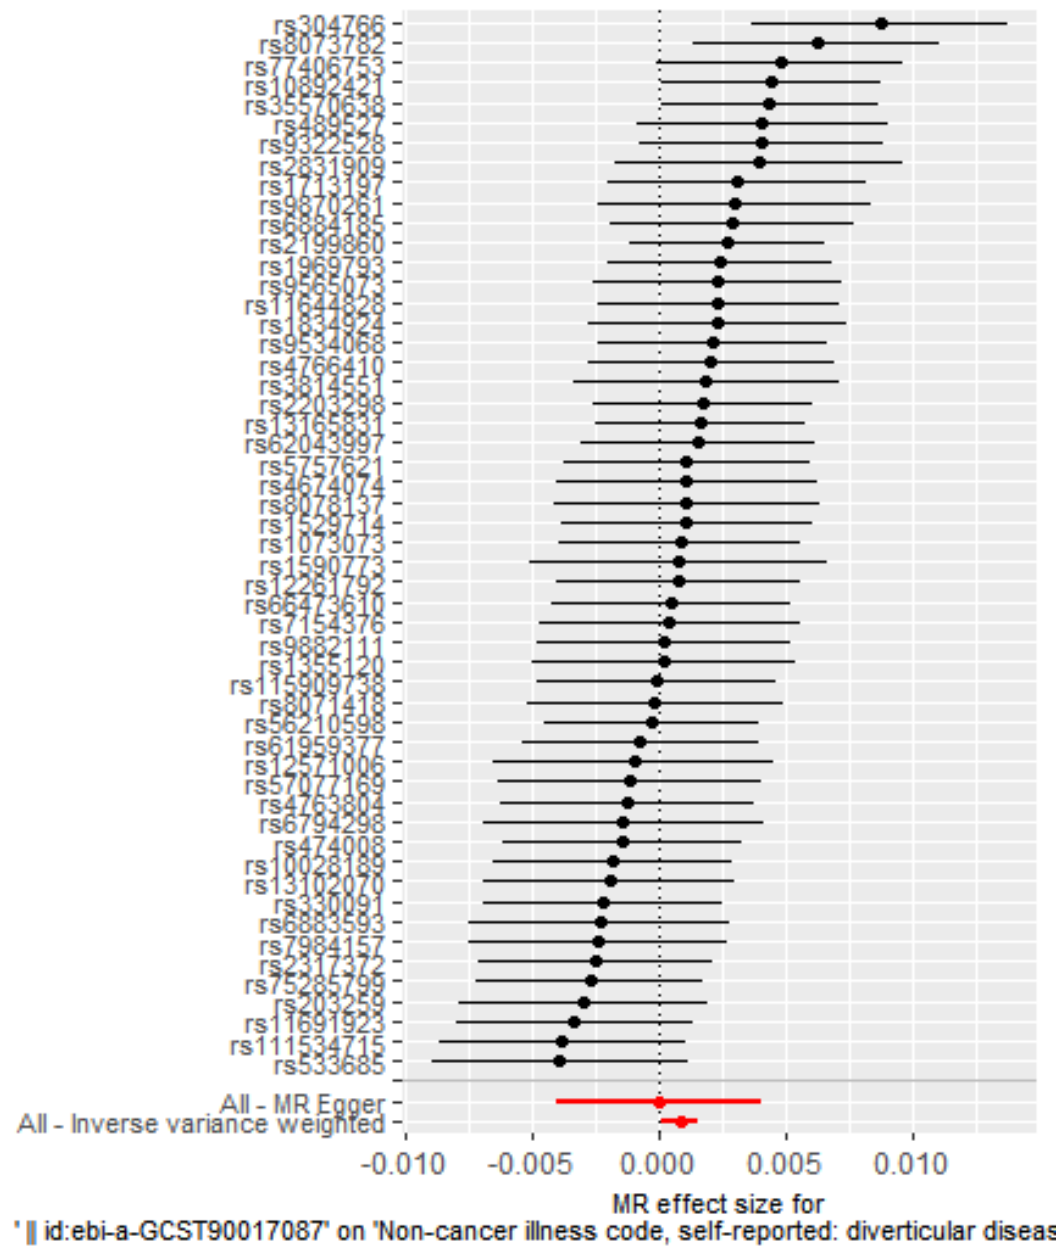

n-cancer illness code, self-reported: diverticular disease/diverticulitis || id:ukb-b-1

### MR Test

- Inverse variance weighted
- MR Egger
- Simple mode
- Weighted median
- Weighted mode

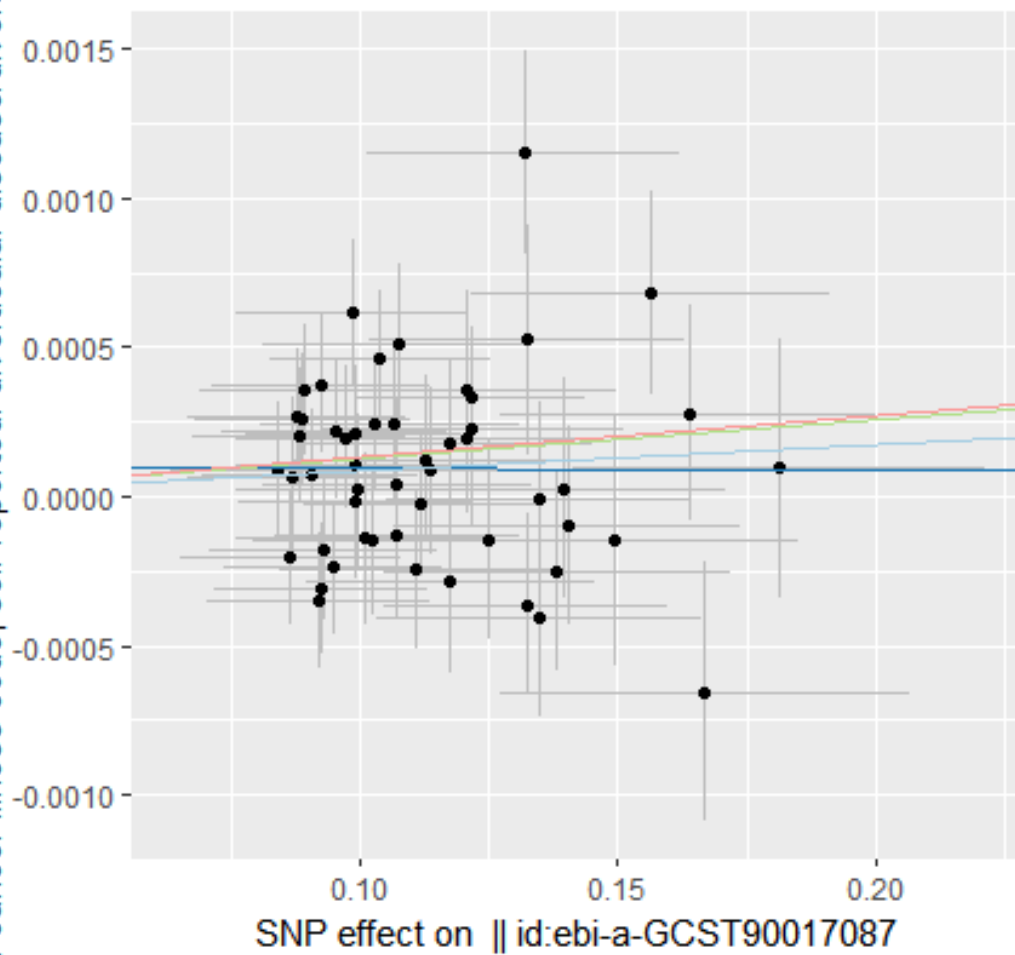



**Figure 111** Leave-one-out analysis, funnel plot, MR effect size and scatter plot for gut microbiota abundance (order Selenomonadales id.2165) on diverticular disease

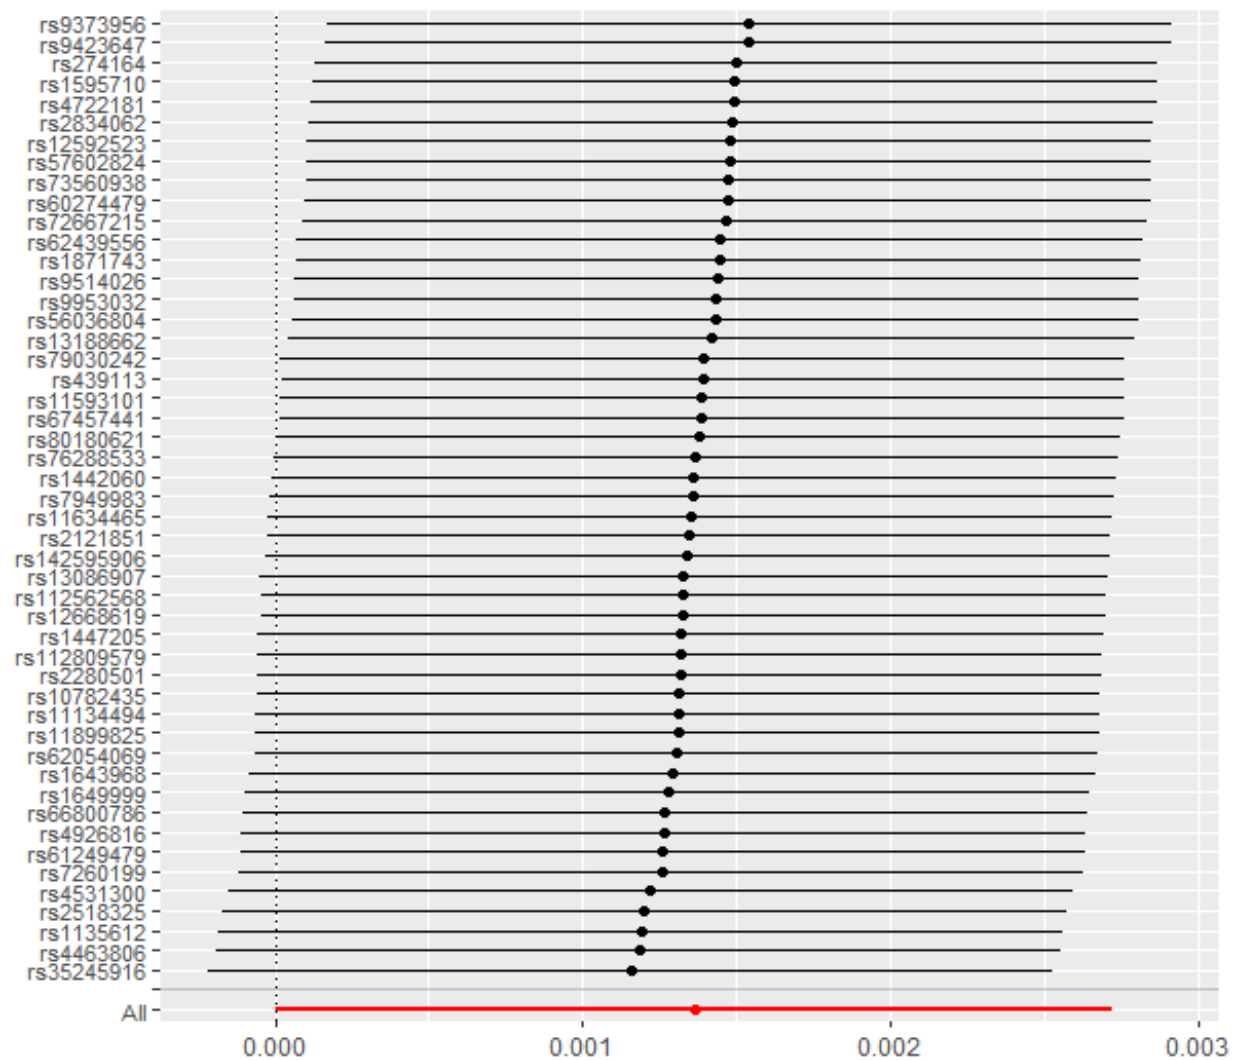

MR leave-one-out sensitivity analysis for  
' || id:ebi-a-GCST90017107' on 'Non-cancer illness code, self-reported: diverticular disease/diverticulitis || id:ukb-b-14'

MR Method

- Inverse variance weighted
- MR Egger

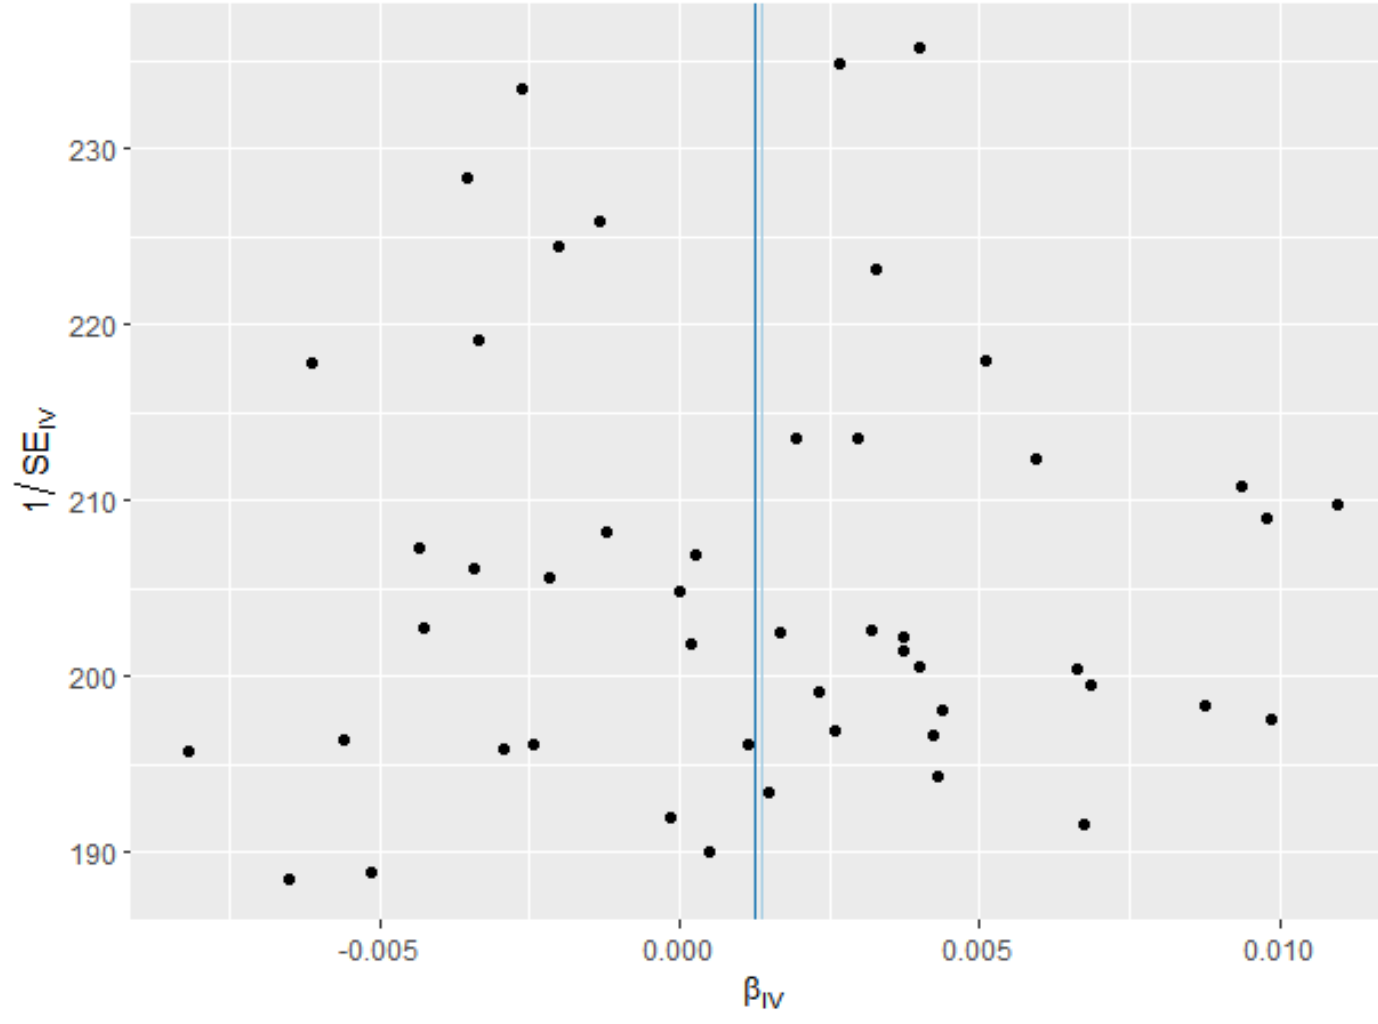

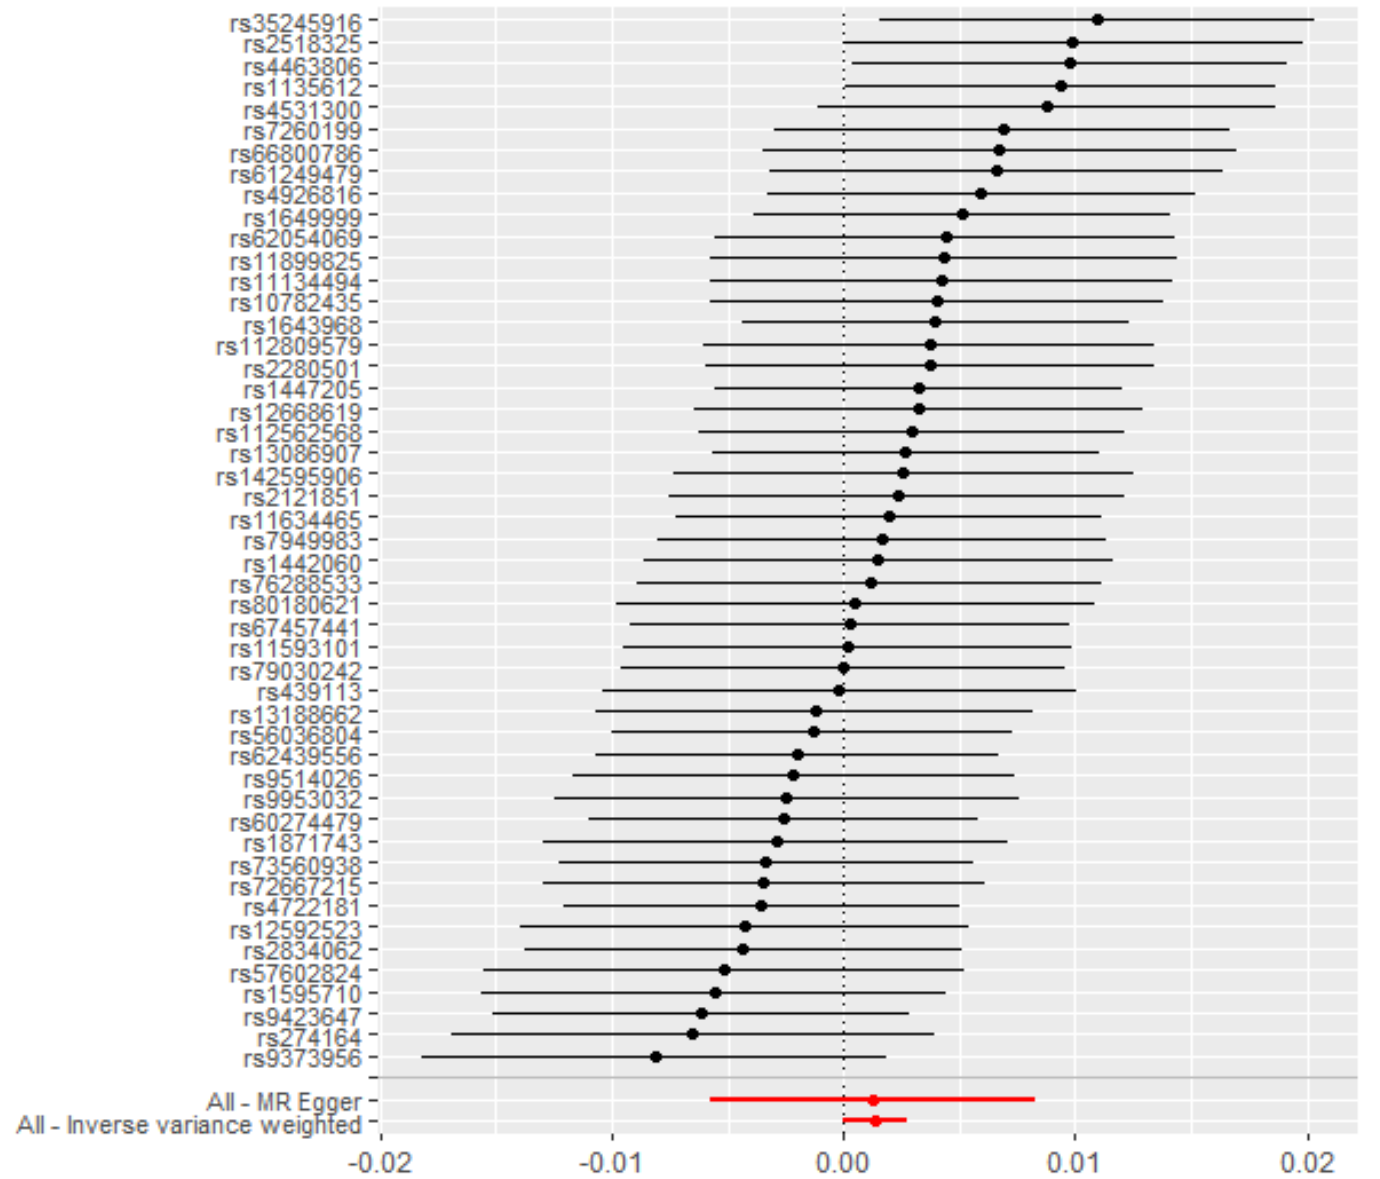

non-cancer illness code, self-reported: diverticular disease/diverticulitis || id:ukb-b-147

MR Test

- Inverse variance weighted
- MR Egger
- Simple mode
- Weighted median
- Weighted mode

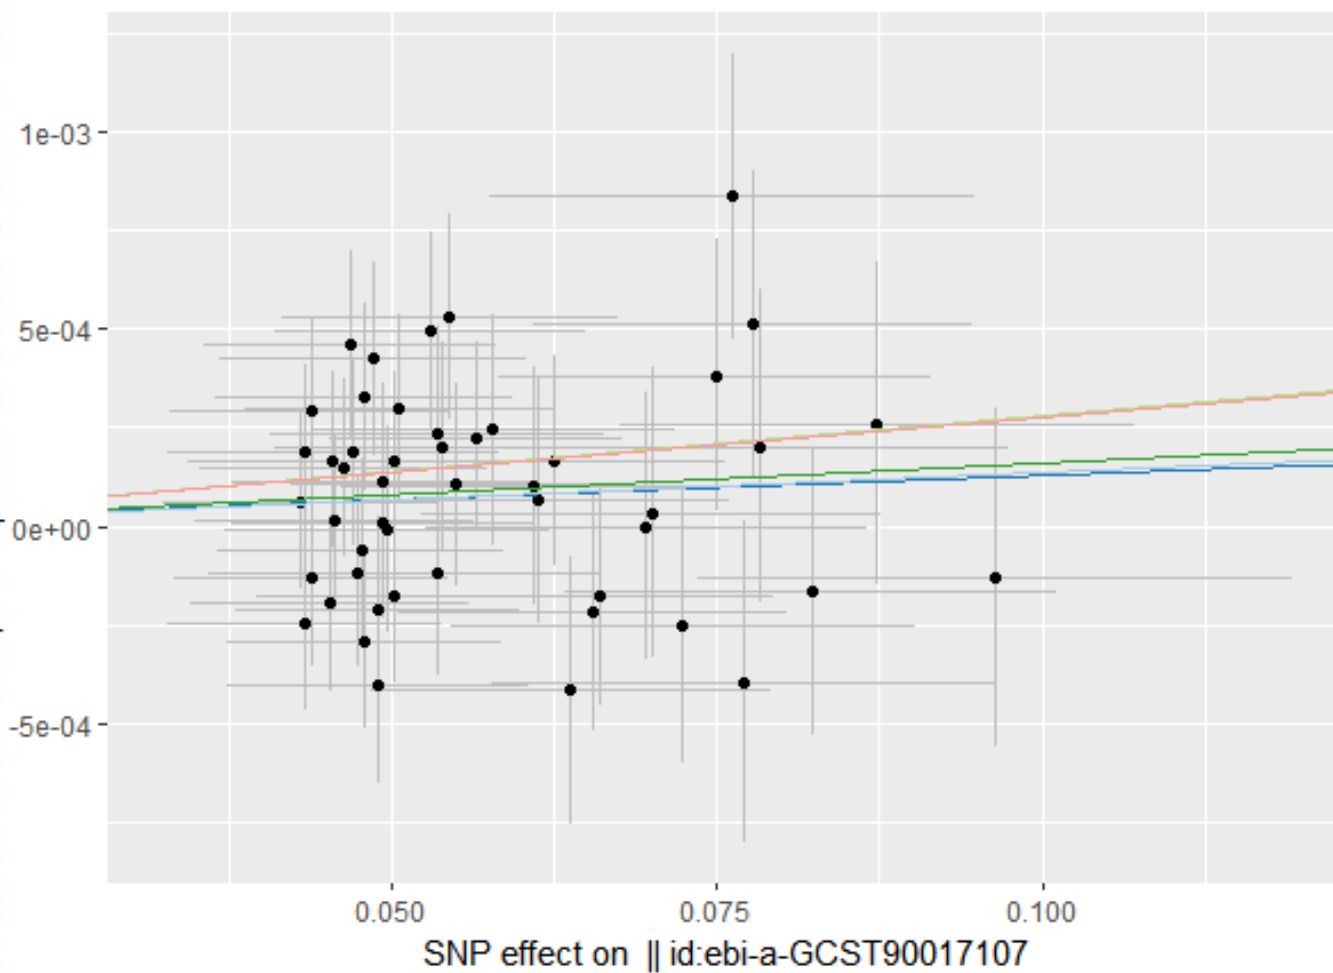

**Figure 112** Leave-one-out analysis, funnel plot, MR effect size and scatter plot for gut microbiota abundance (class Verrucomicrobiae id.4029) on crohn's disease

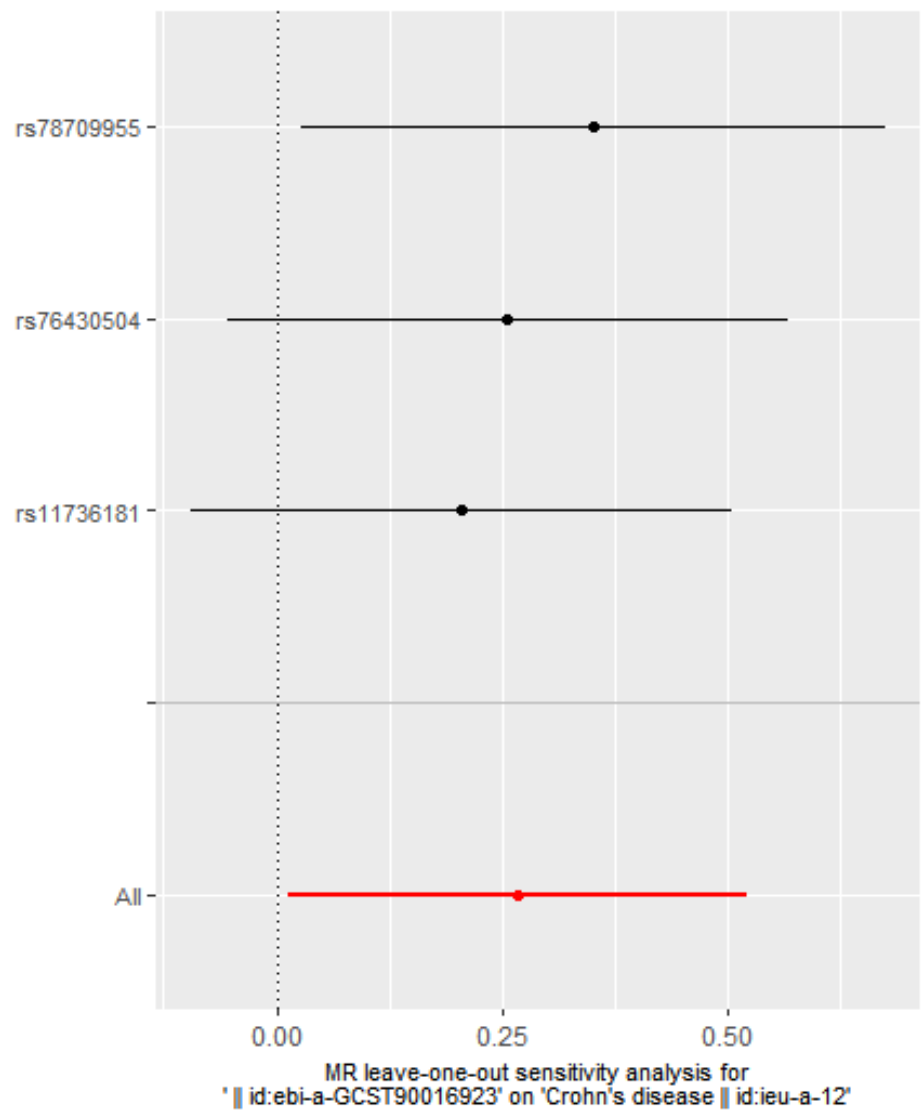

MR Method

- Inverse variance weighted
- MR Egger

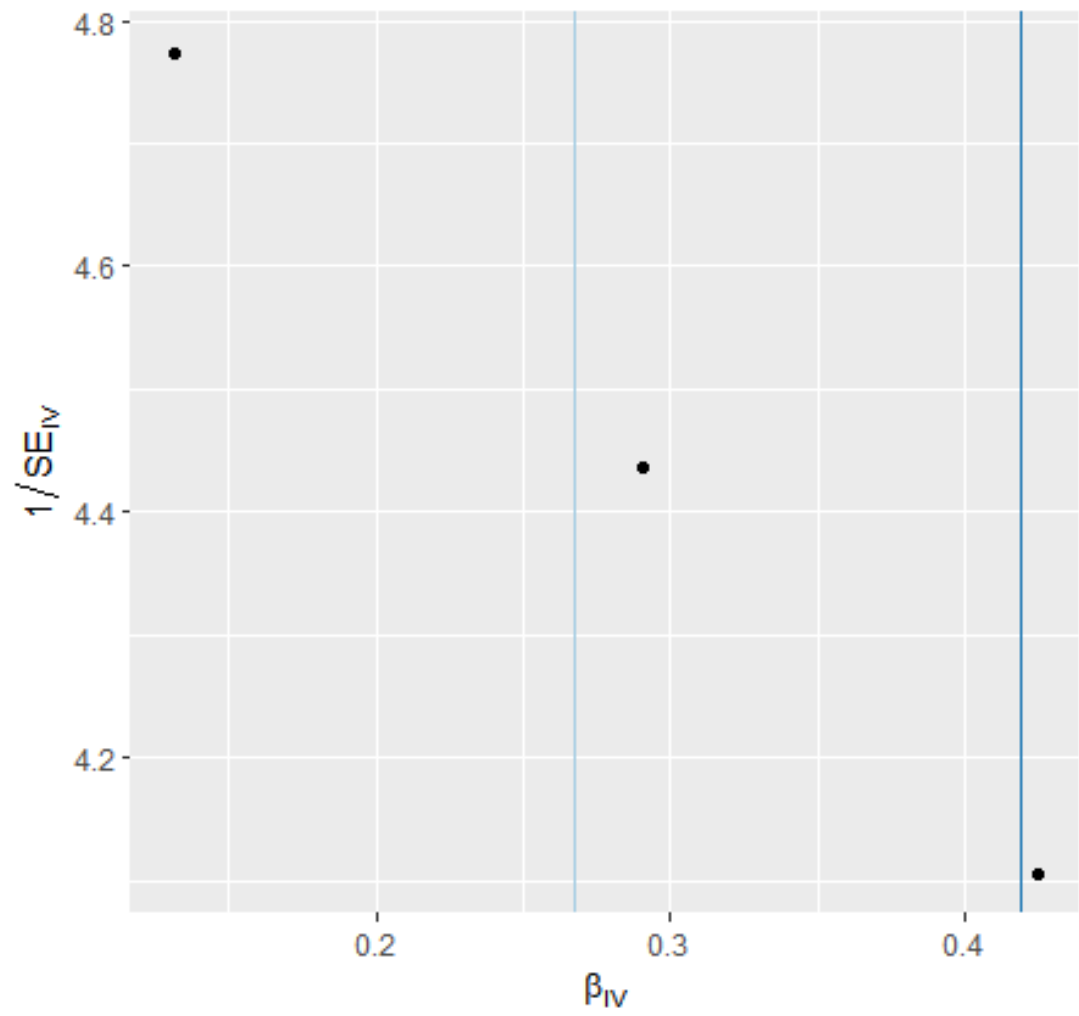

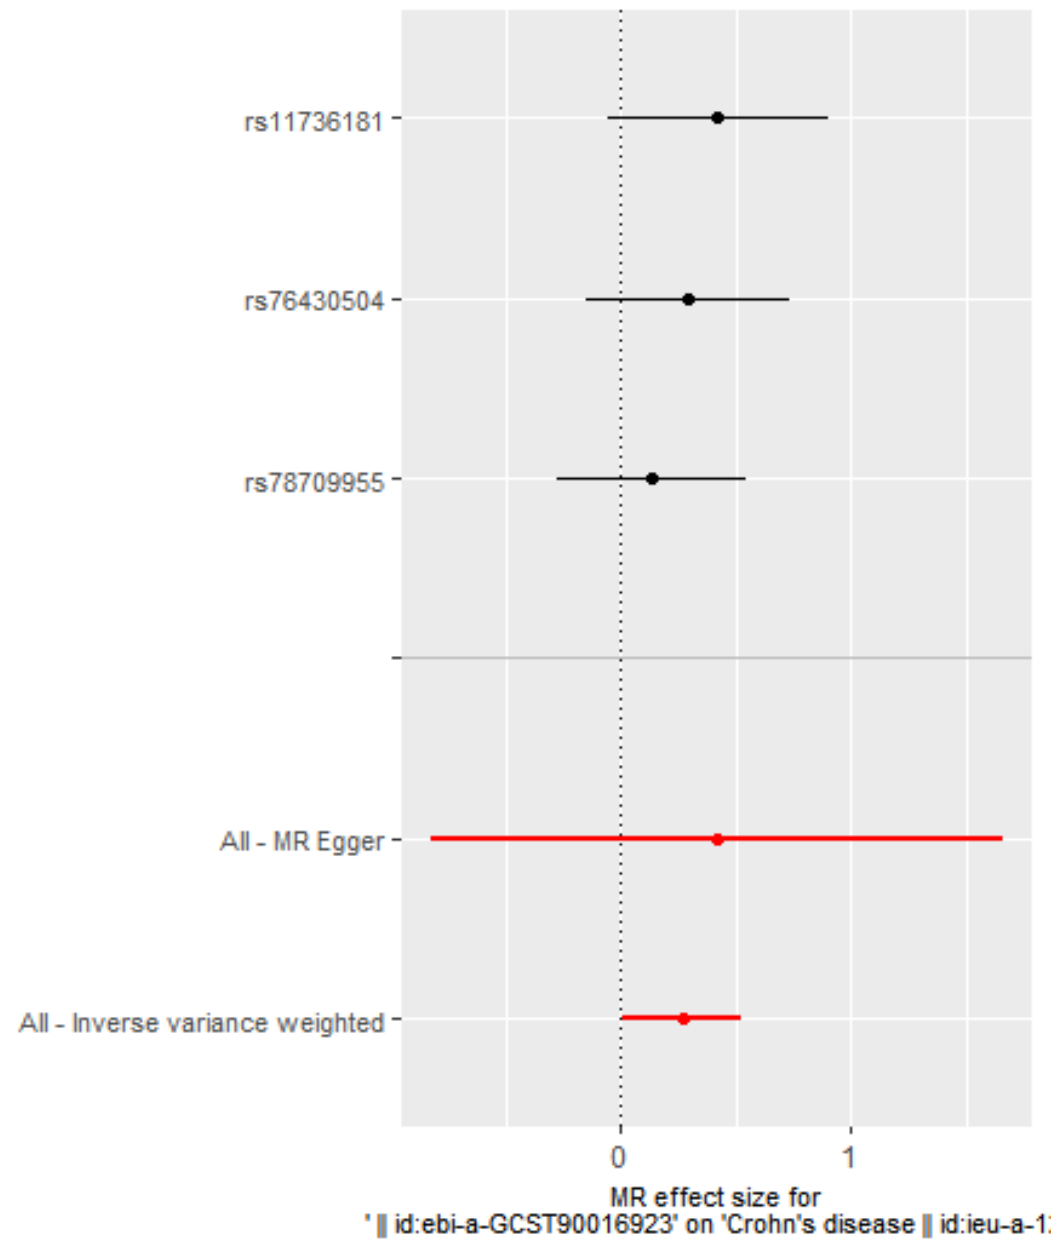

### MR Test

- Inverse variance weighted
- MR Egger
- Simple mode
- Weighted median
- Weighted mode

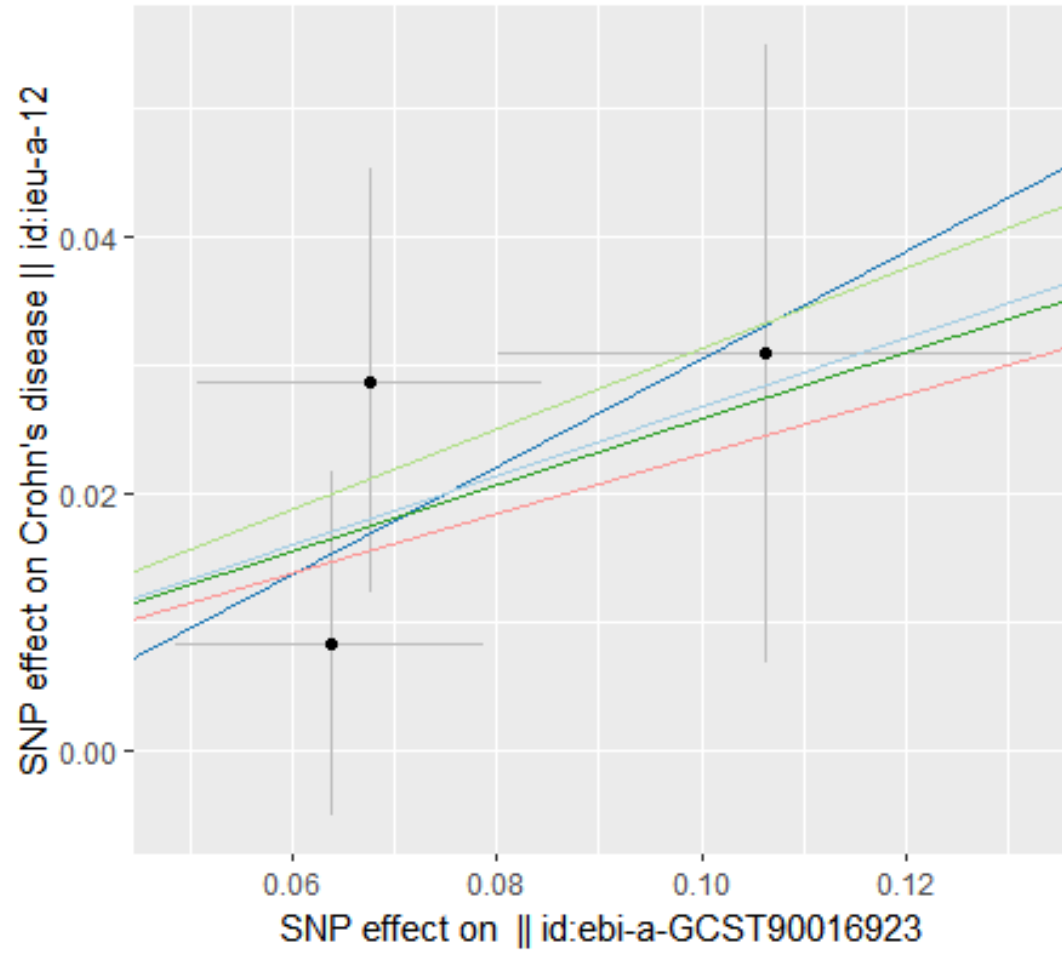



**Figure 113** Leave-one-out analysis, funnel plot, MR effect size and scatter plot for gut microbiota abundance (family Peptostreptococcaceae id.2042) on crohn's disease

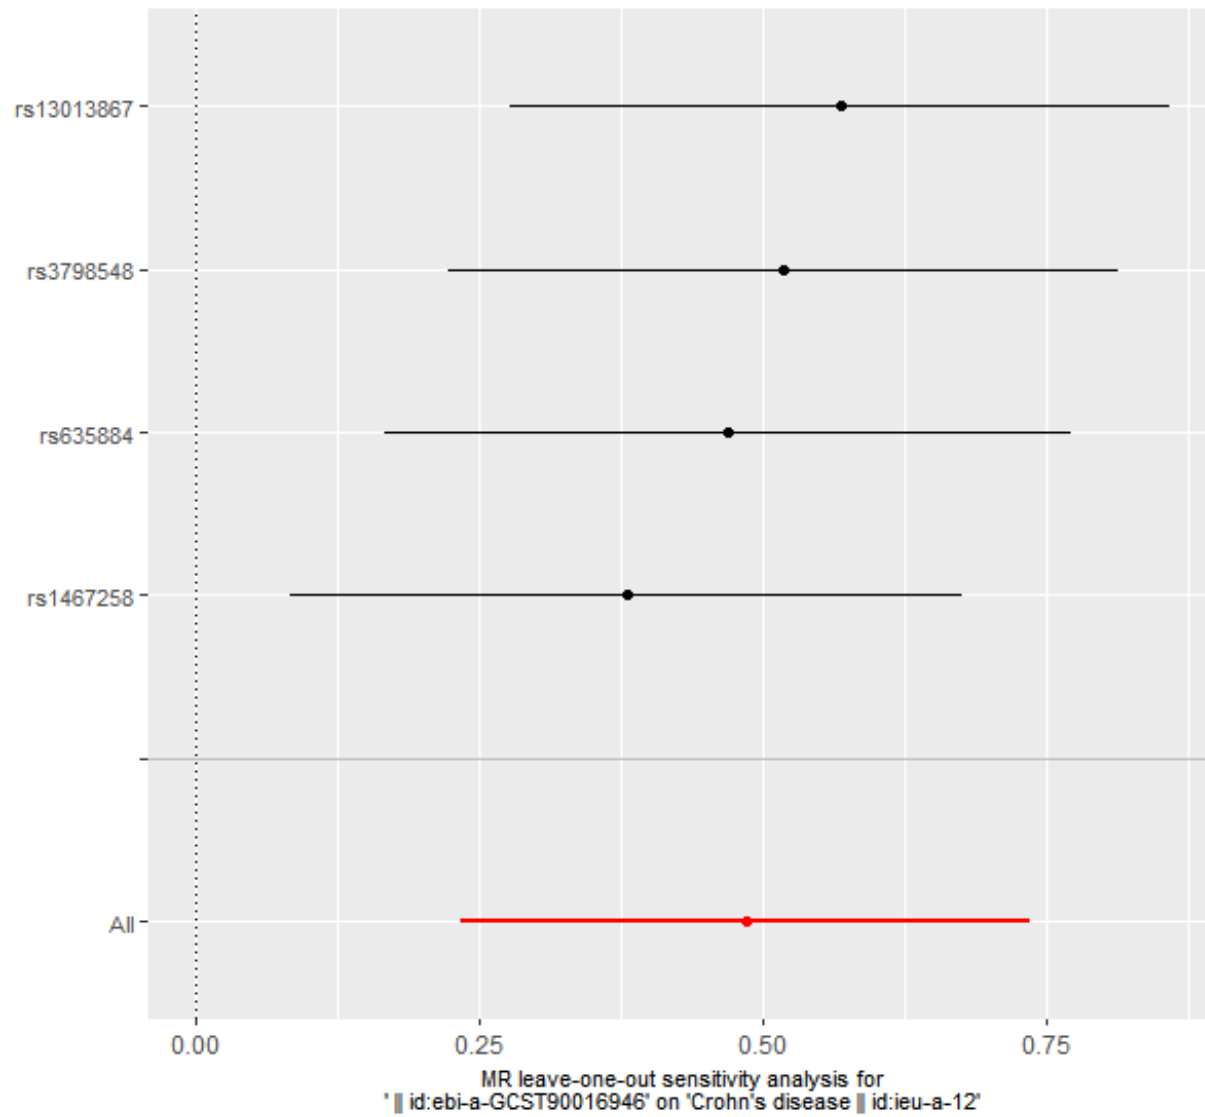

MR Method

- Inverse variance weighted
- MR Egger

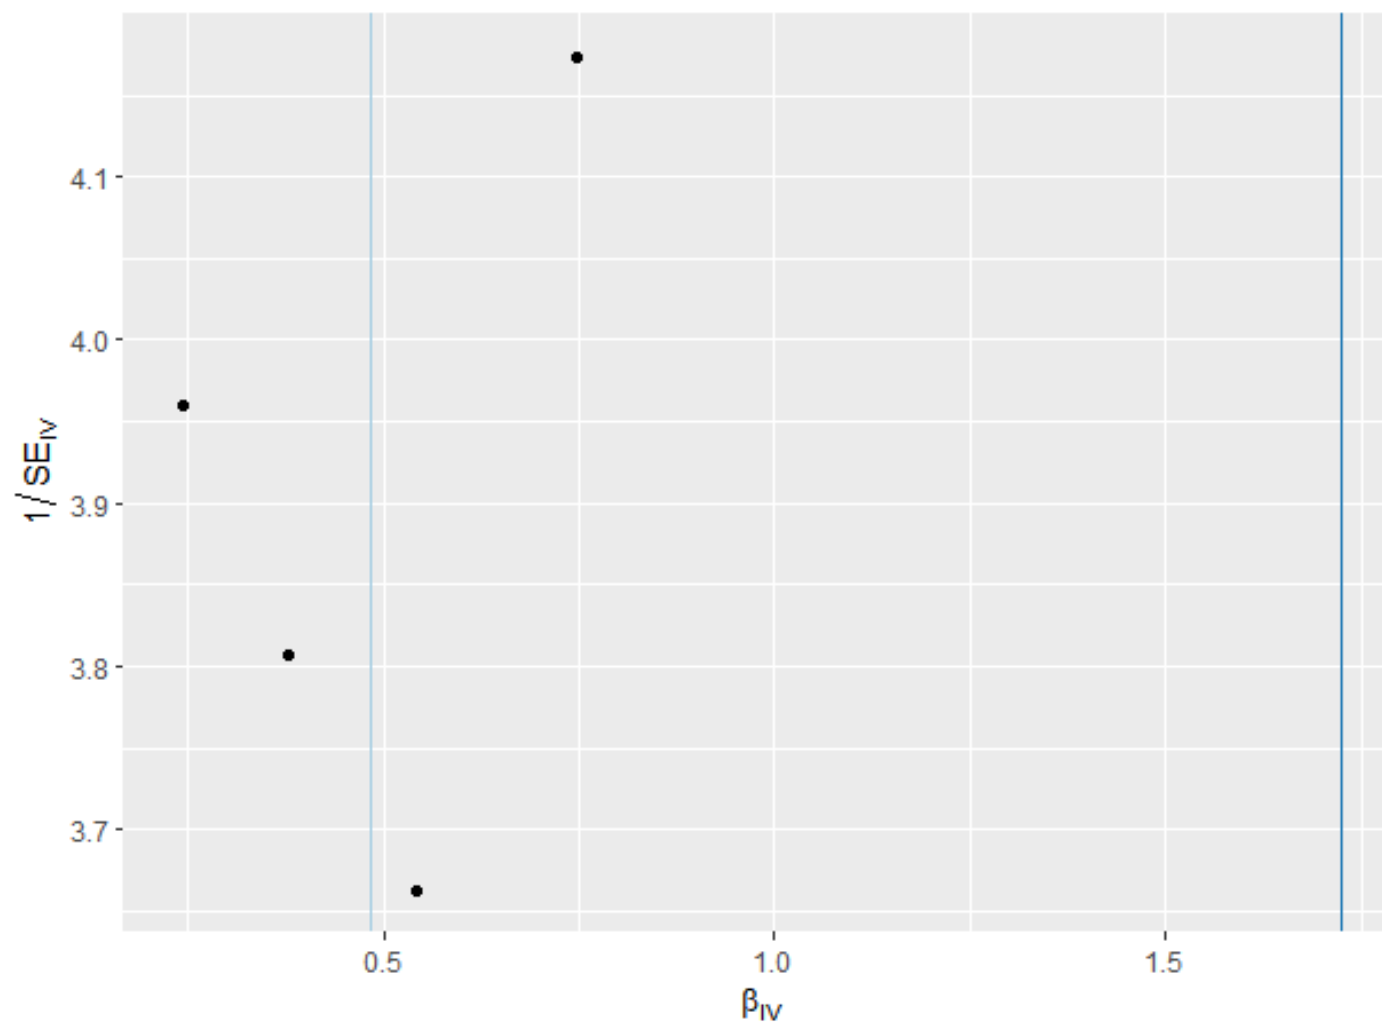

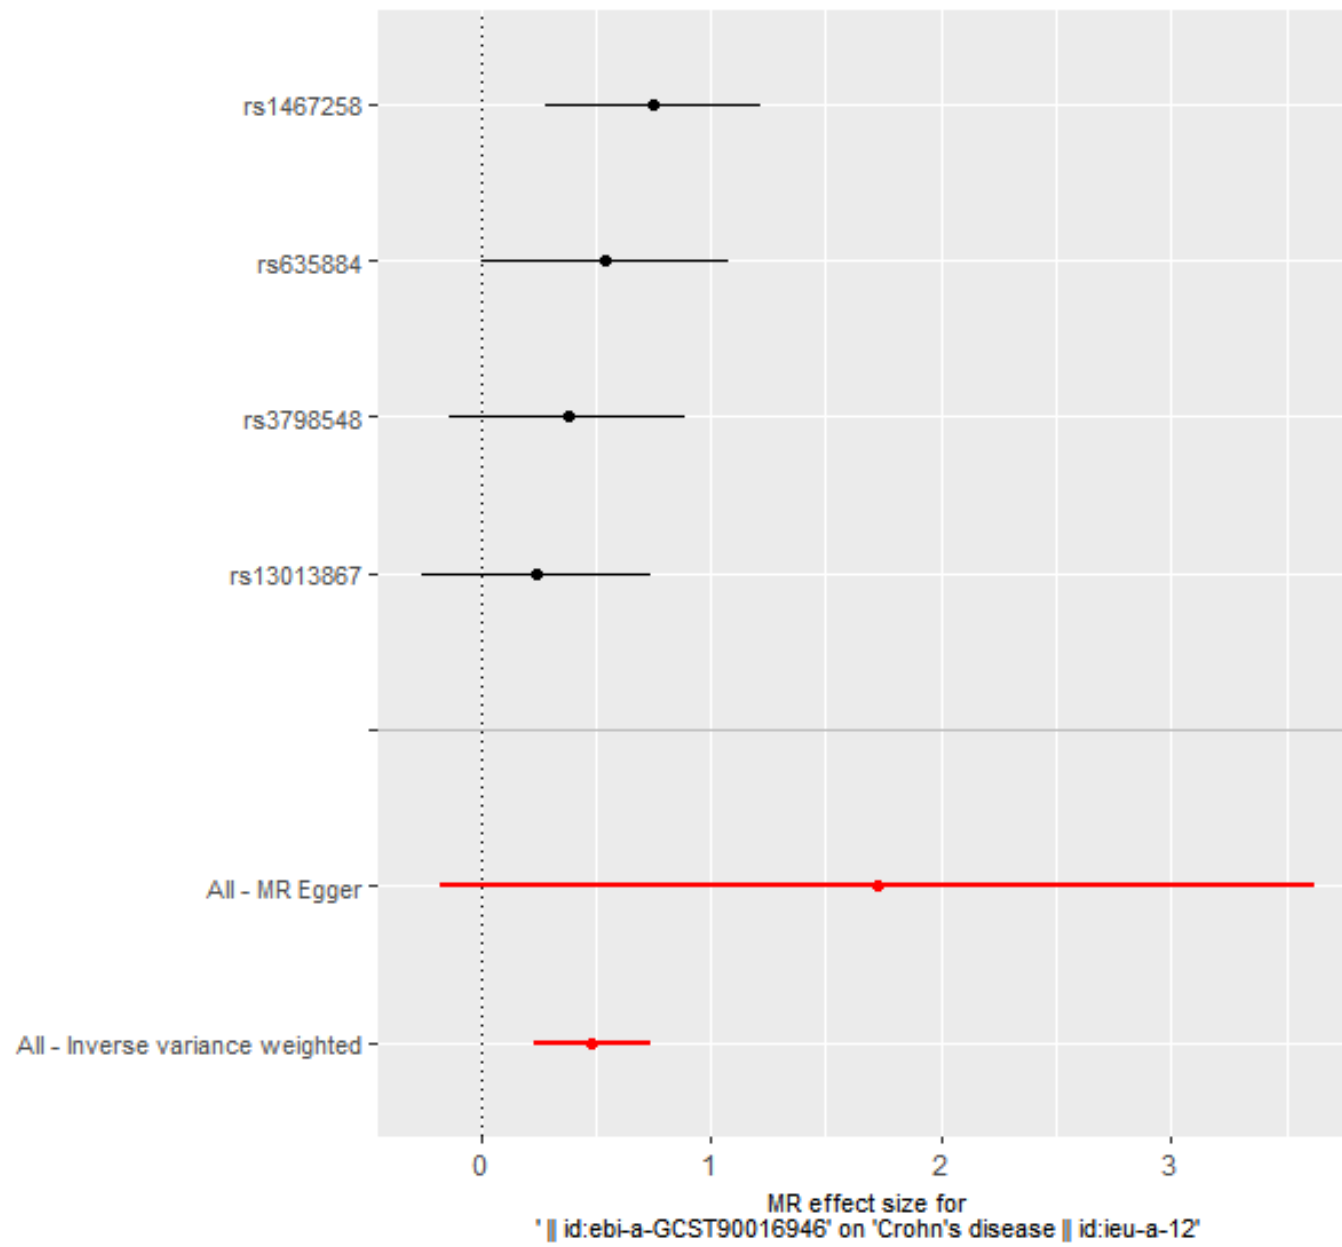

MR Test

- Inverse variance weighted
- MR Egger
- Simple mode
- Weighted median
- Weighted mode

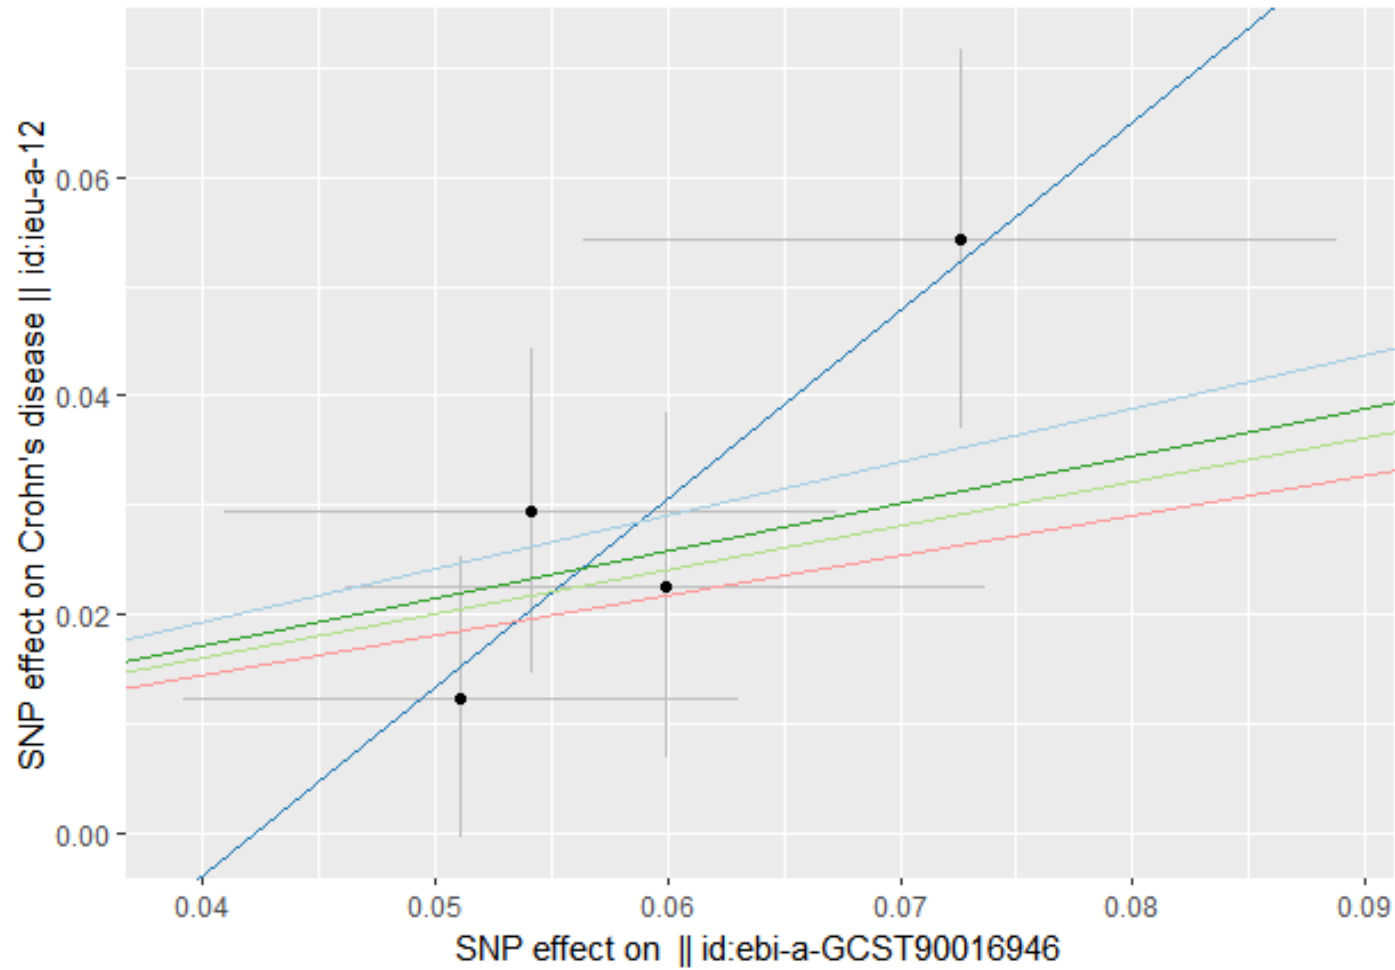

**Figure 114** Leave-one-out analysis, funnel plot, MR effect size and scatter plot for gut microbiota abundance (unknown family id.1000006161) on crohn's disease

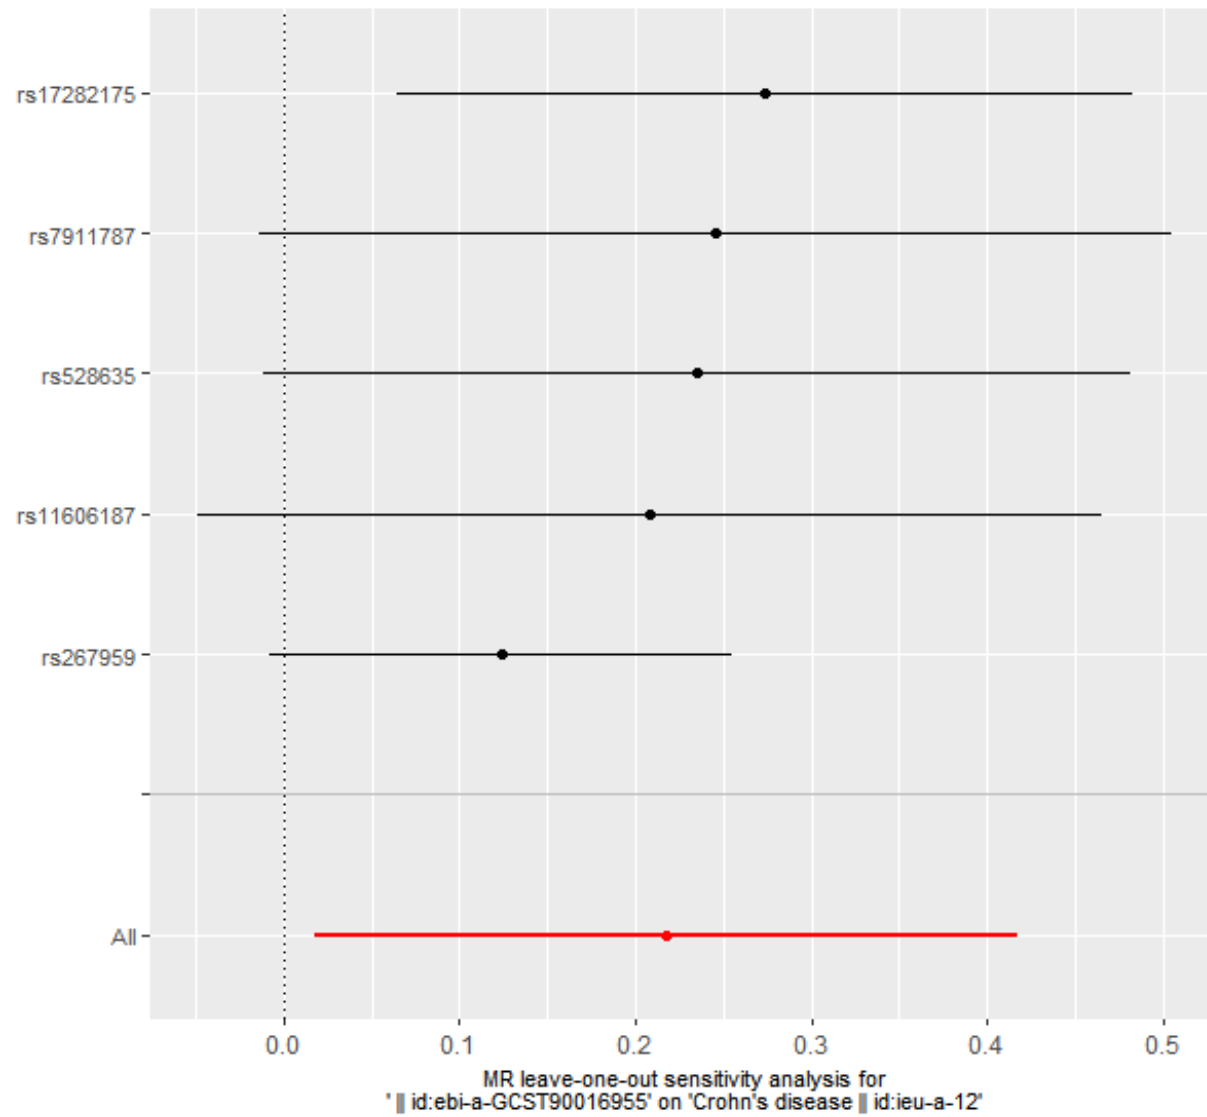

MR Method

- Inverse variance weighted
- MR Egger

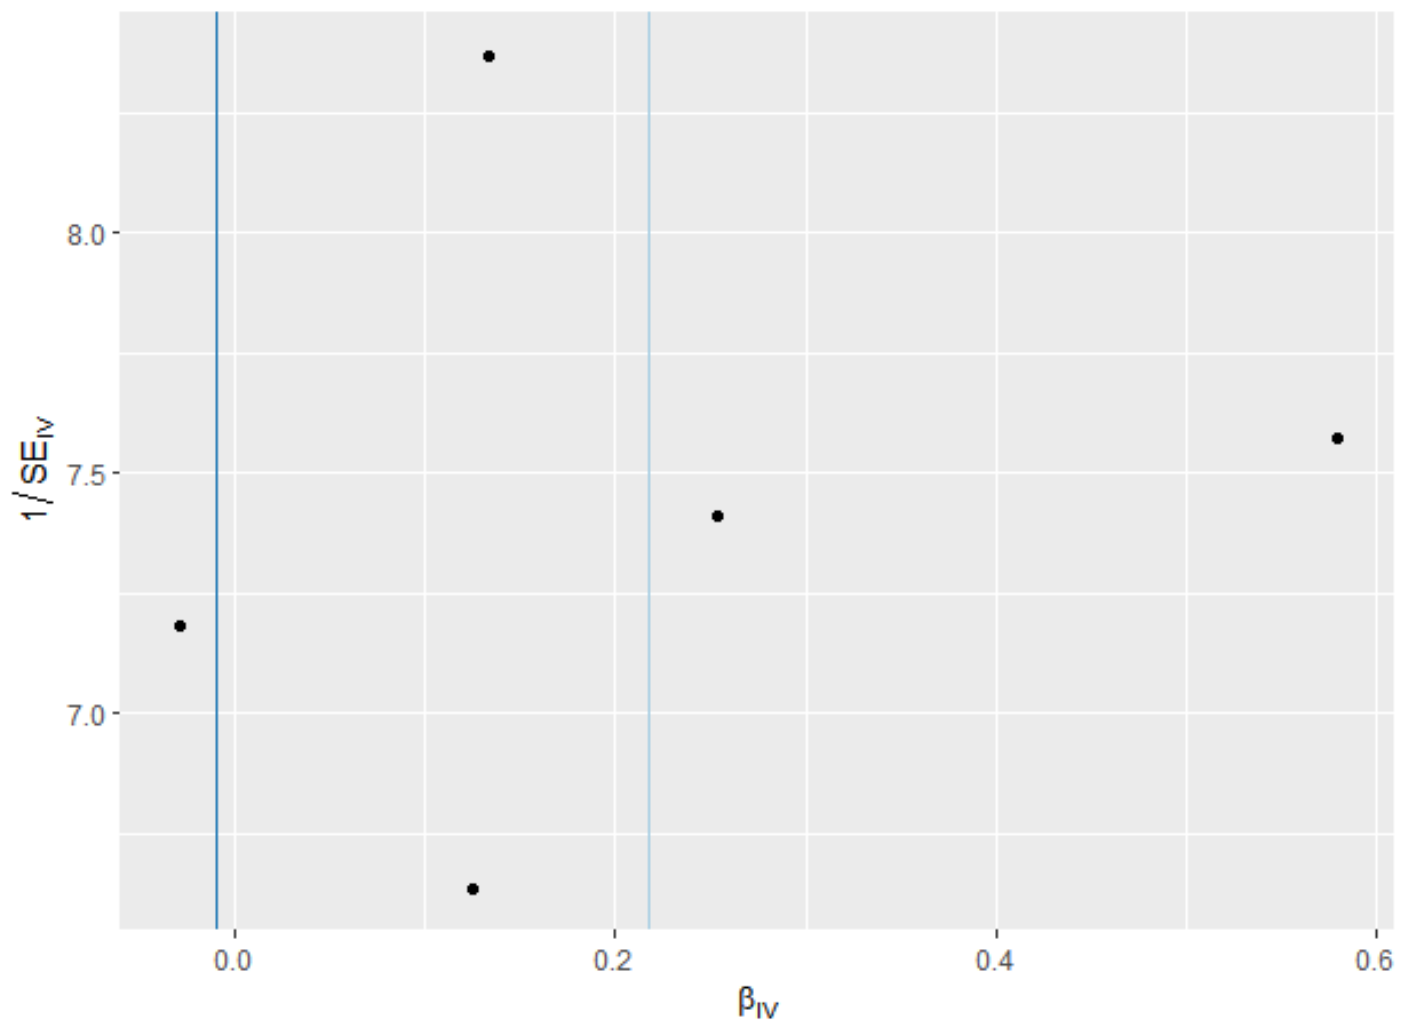

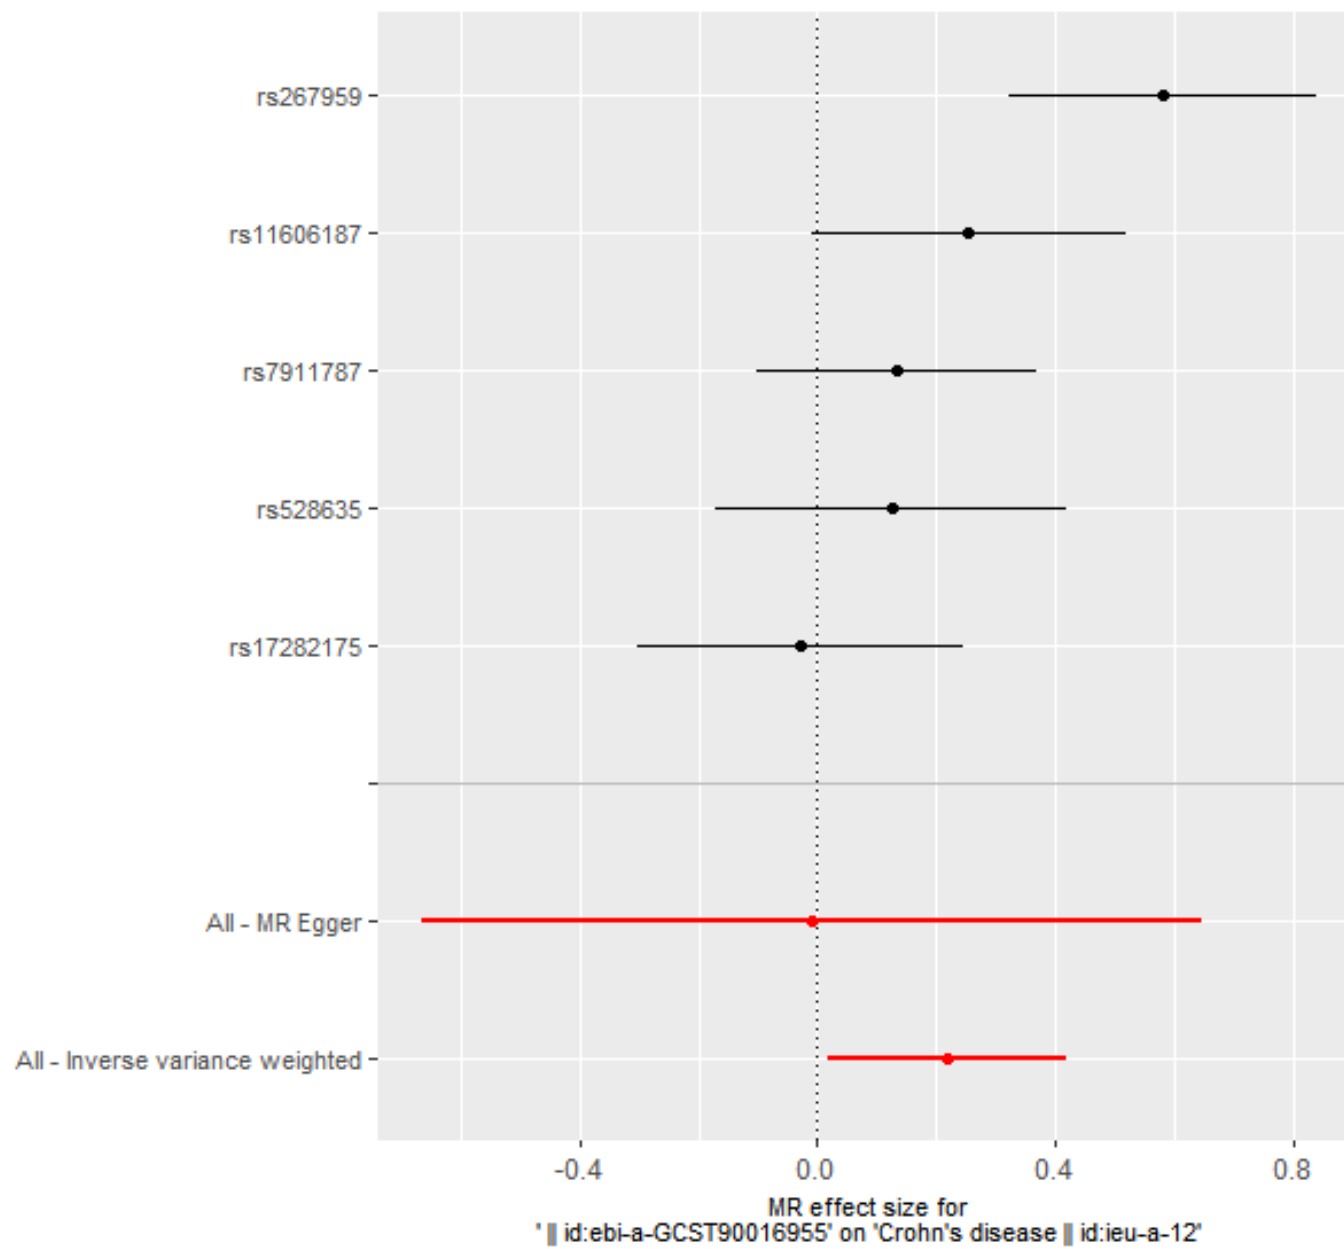

MR Test

- Inverse variance weighted
- MR Egger
- Simple mode
- Weighted median
- Weighted mode

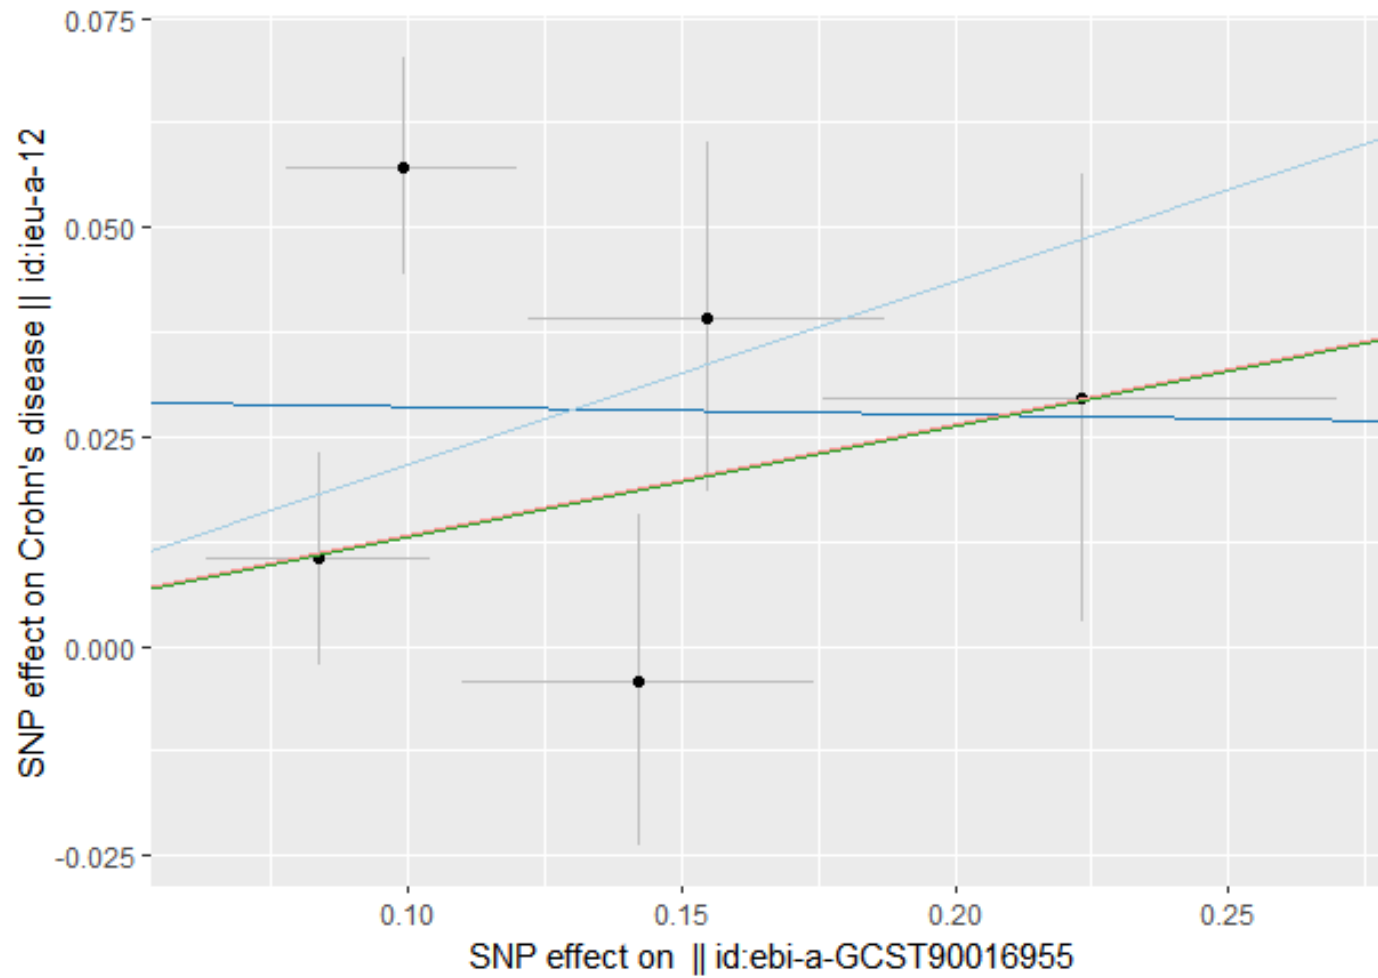



**Figure 115** Leave-one-out analysis, funnel plot, MR effect size and scatter plot for gut microbiota abundance (genus Akkermansia id.4037) on crohn's disease

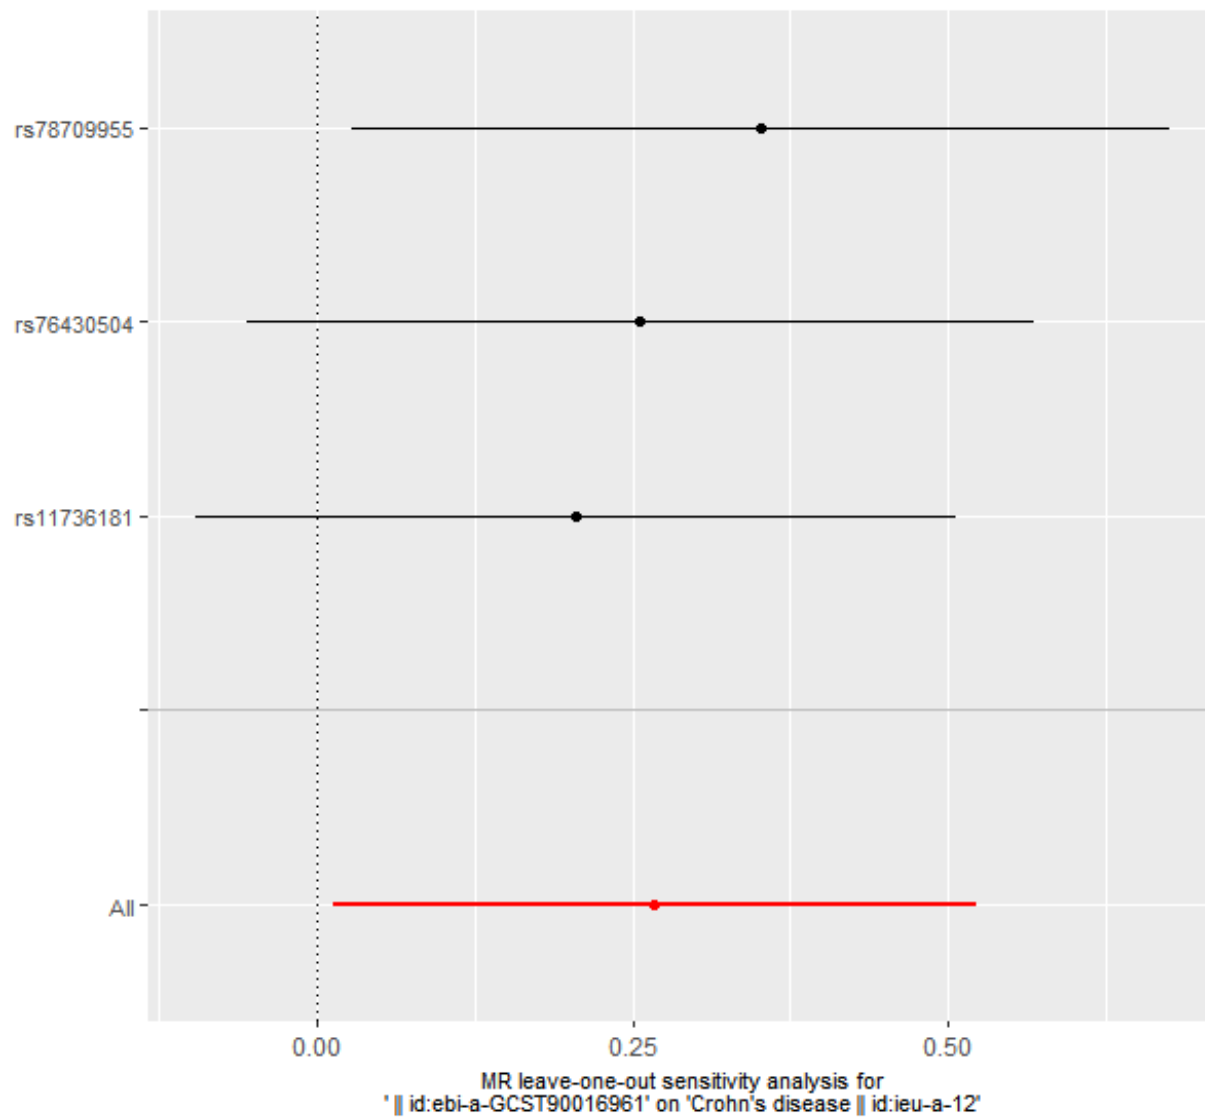

MR Method

- Inverse variance weighted
- MR Egger

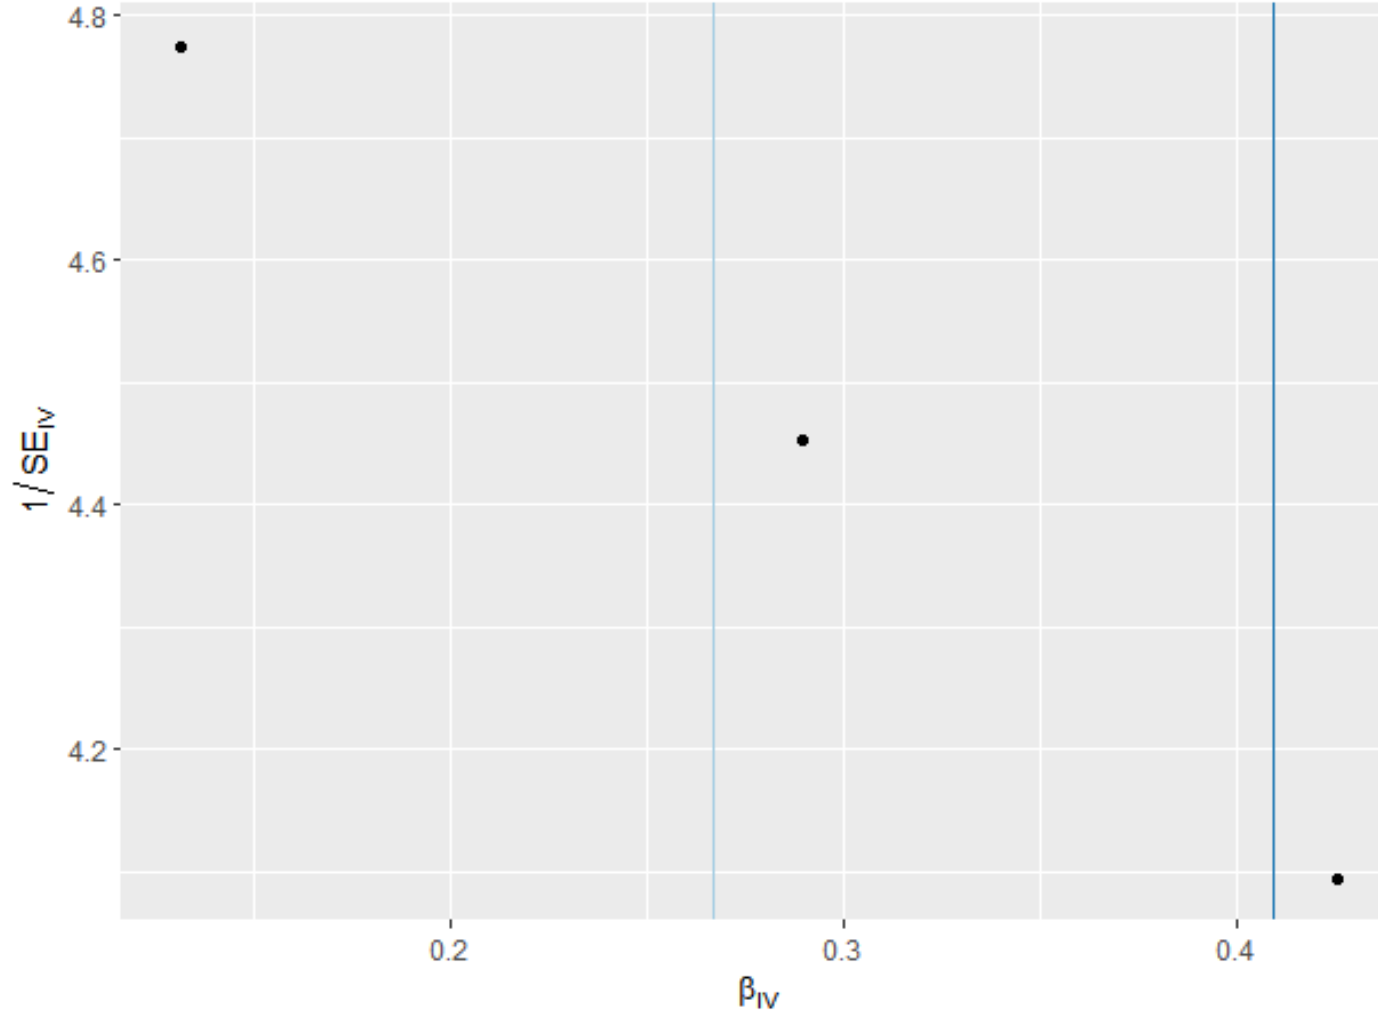

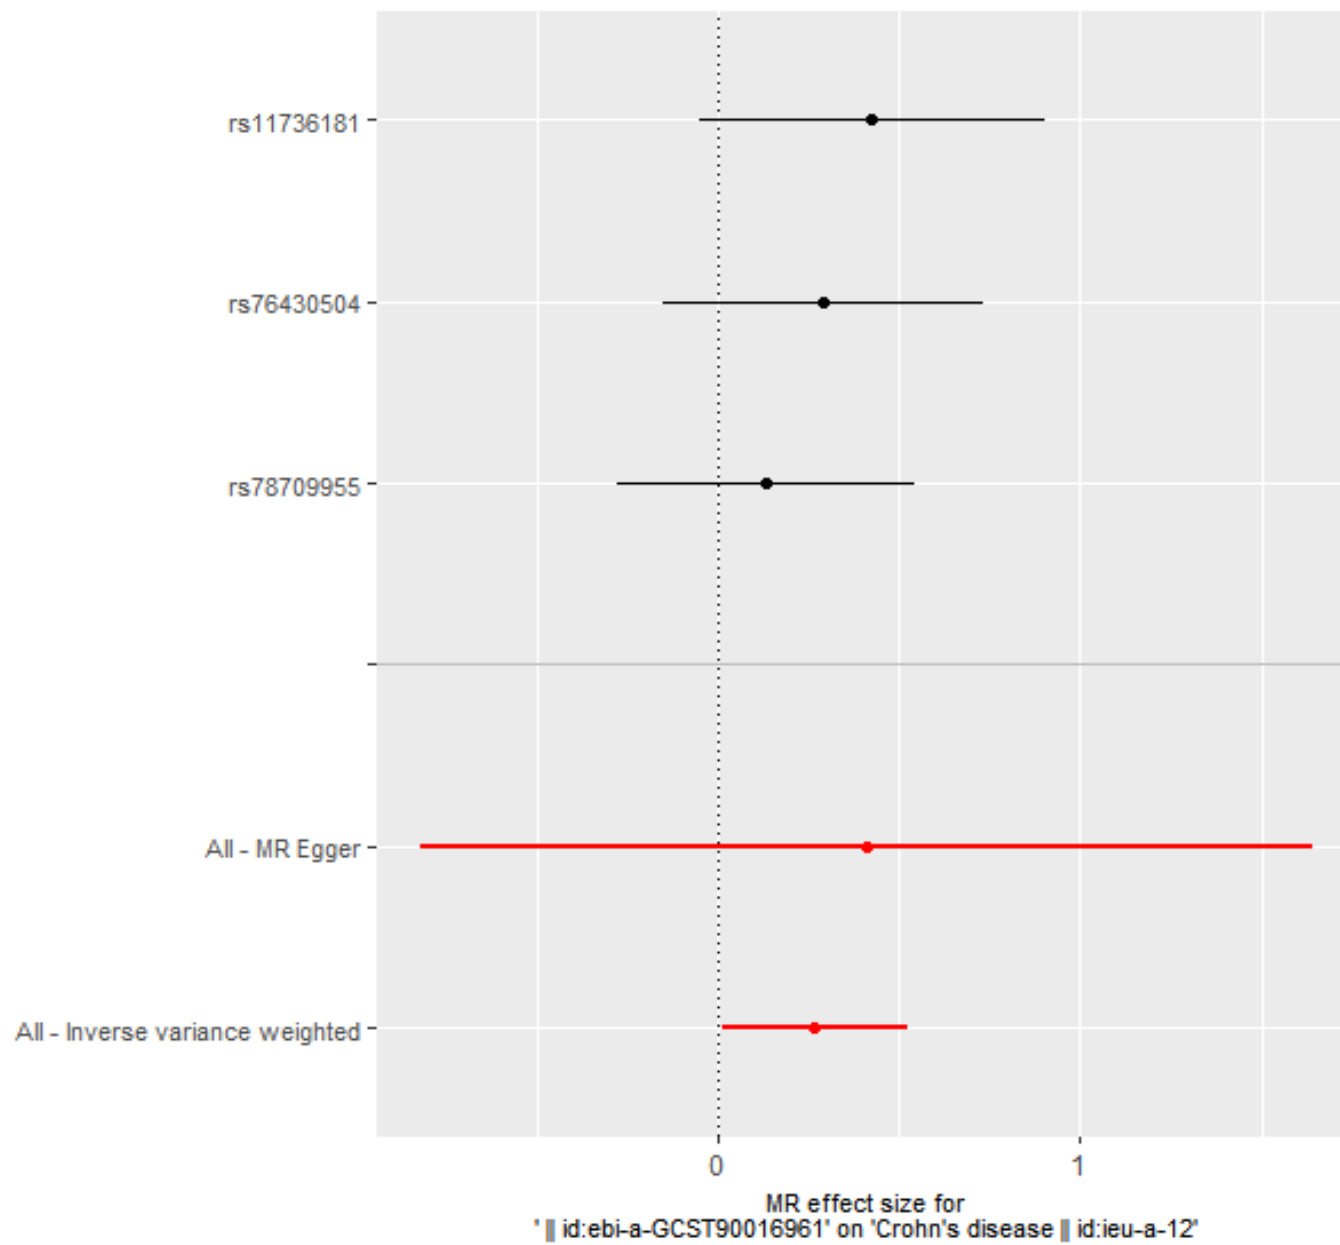

MR Test

- Inverse variance weighted
- MR Egger
- Simple mode
- Weighted median
- Weighted mode

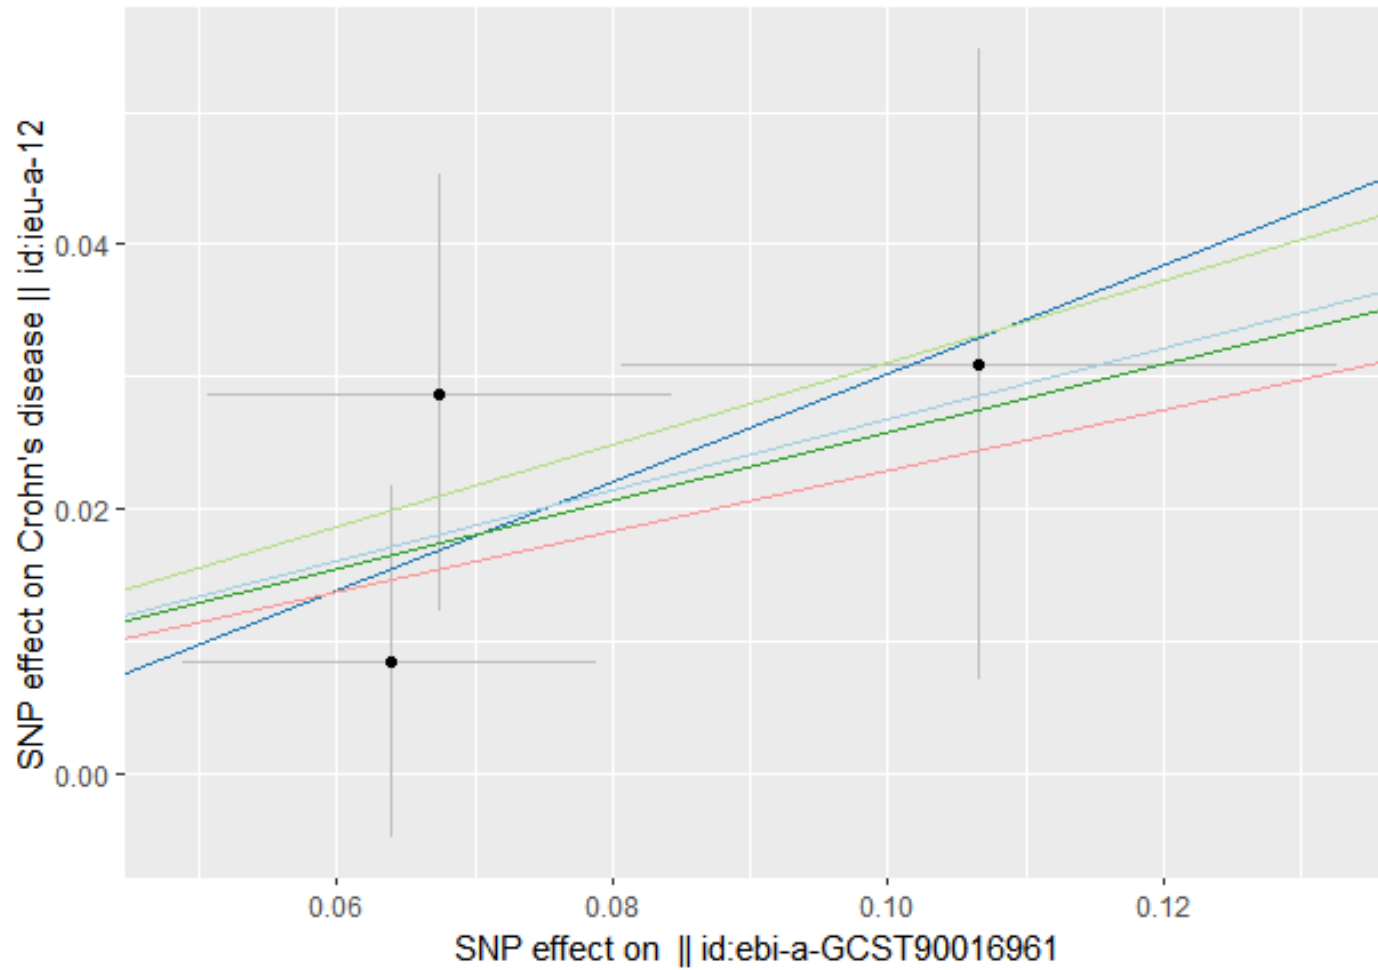

**Figure 116** Leave-one-out analysis, funnel plot, MR effect size and scatter plot for gut microbiota abundance (genus Christensenellaceae R 7group id.11283) on crohn's disease

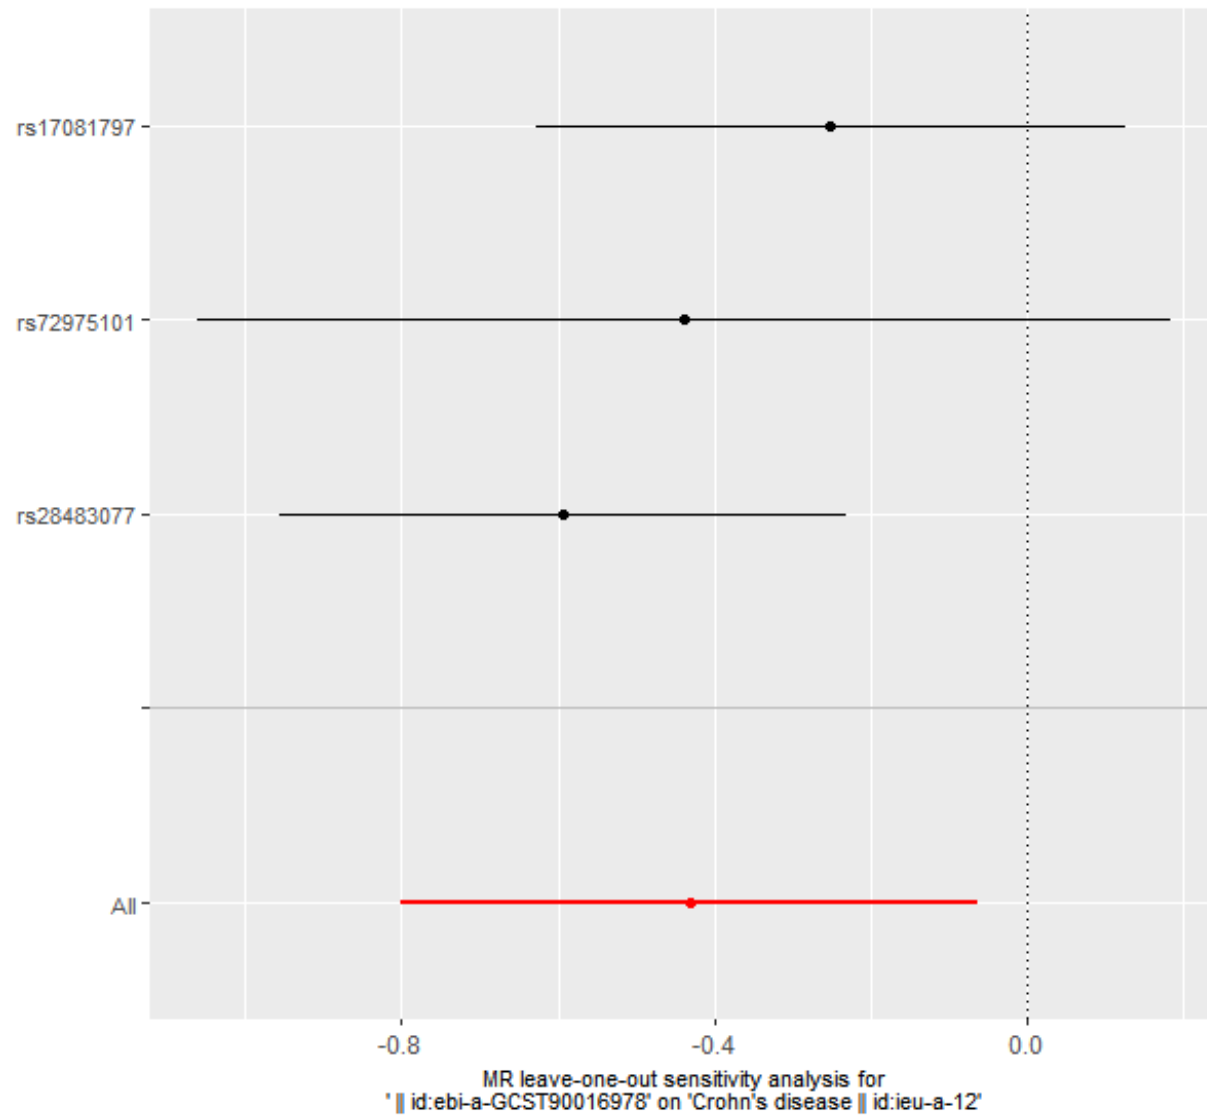

MR Method

- Inverse variance weighted
- MR Egger

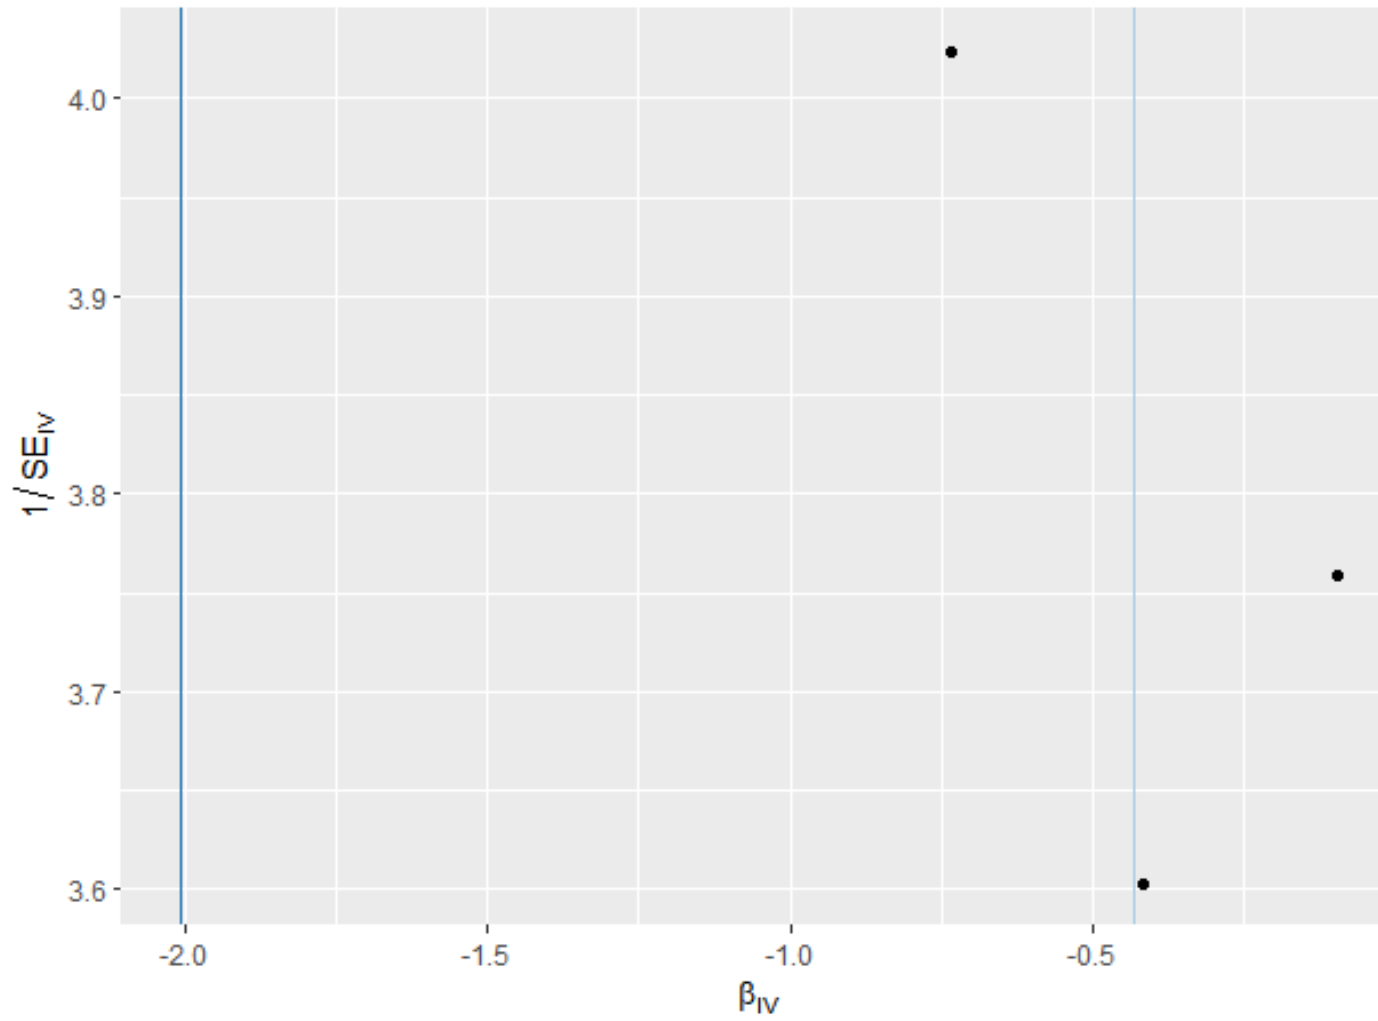

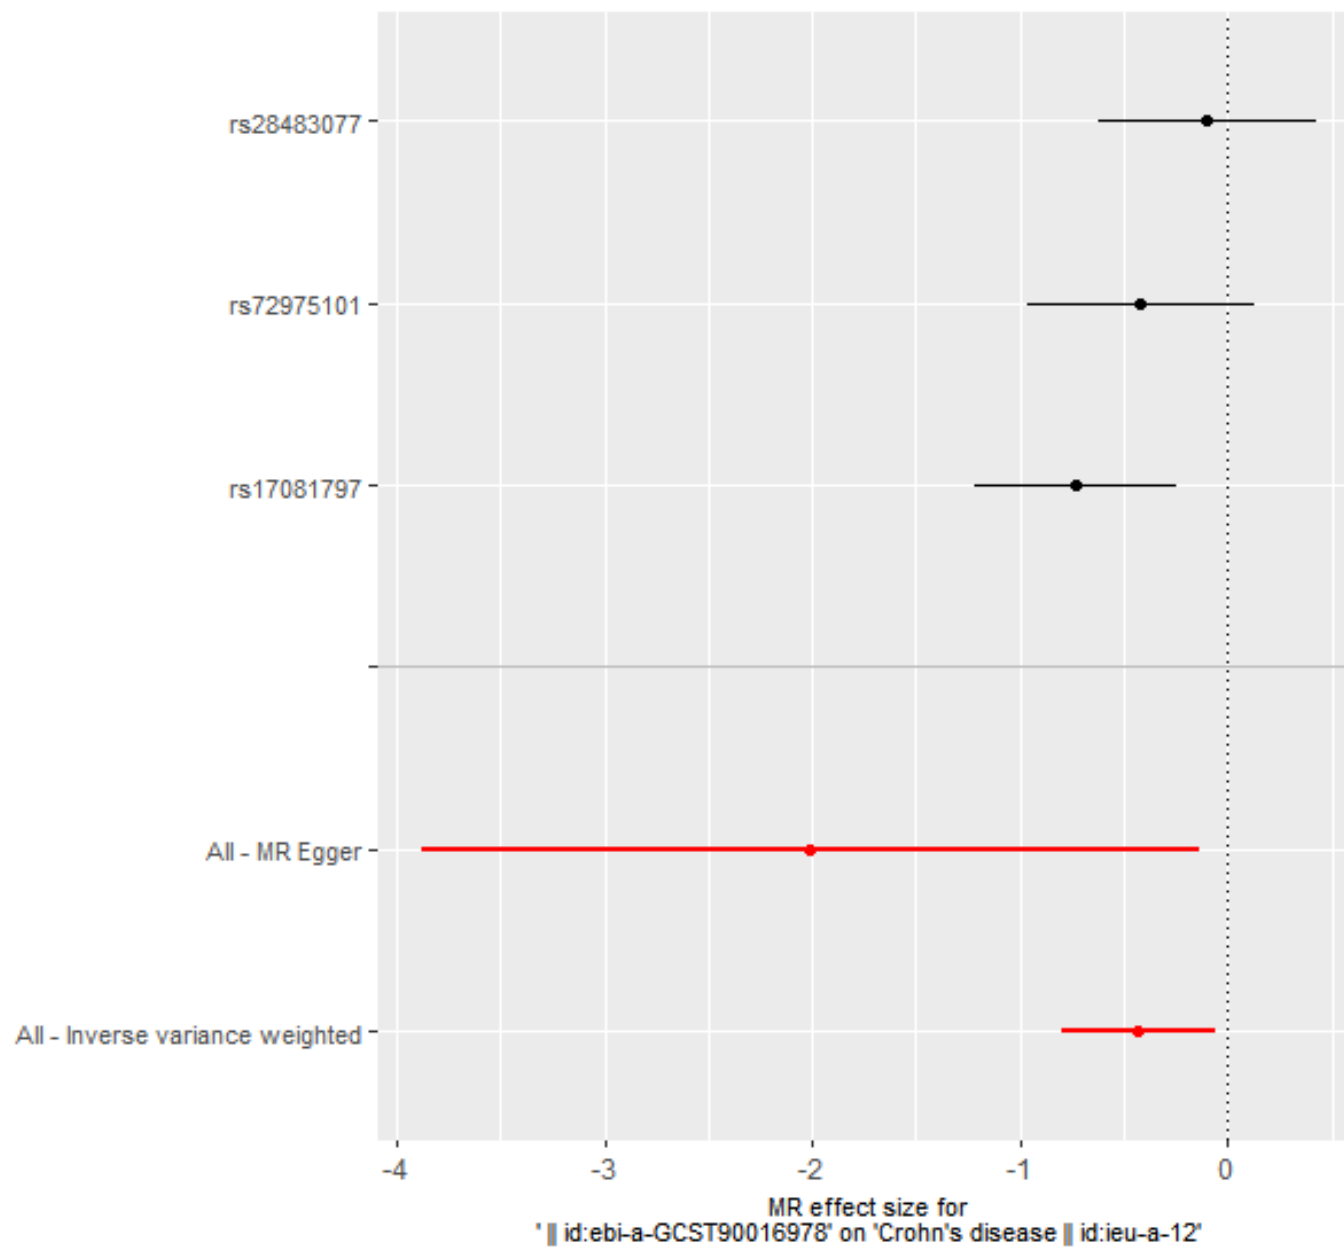

### MR Test

- Inverse variance weighted
- MR Egger
- Simple mode
- Weighted median
- Weighted mode

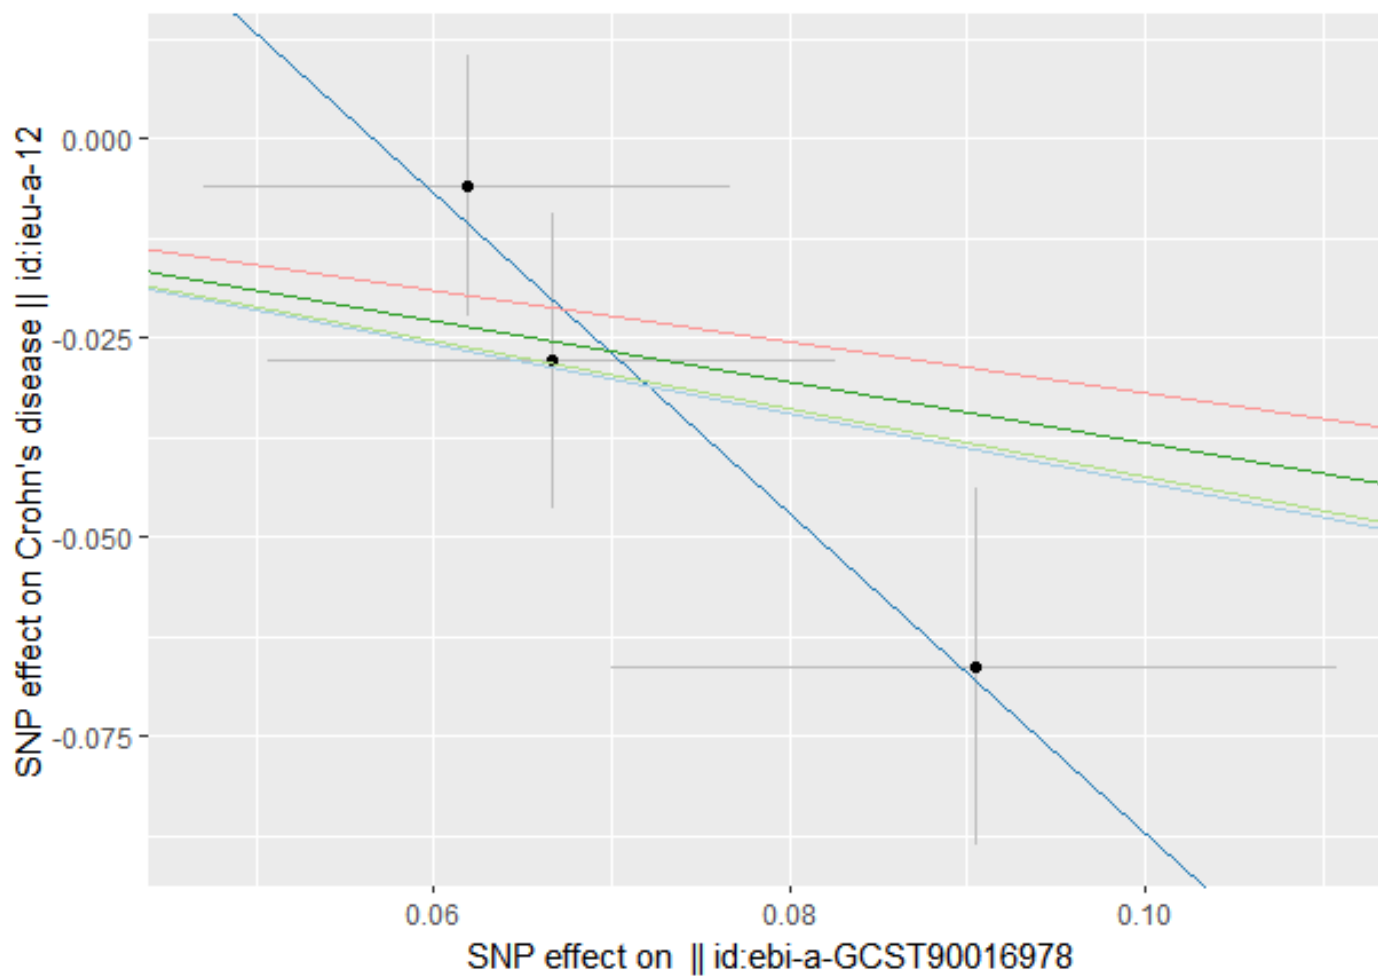



**Figure 117** Leave-one-out analysis, funnel plot, MR effect size and scatter plot for gut microbiota abundance (genus *Eubacterium coprostanoligenes* group id.11375) on crohn's disease

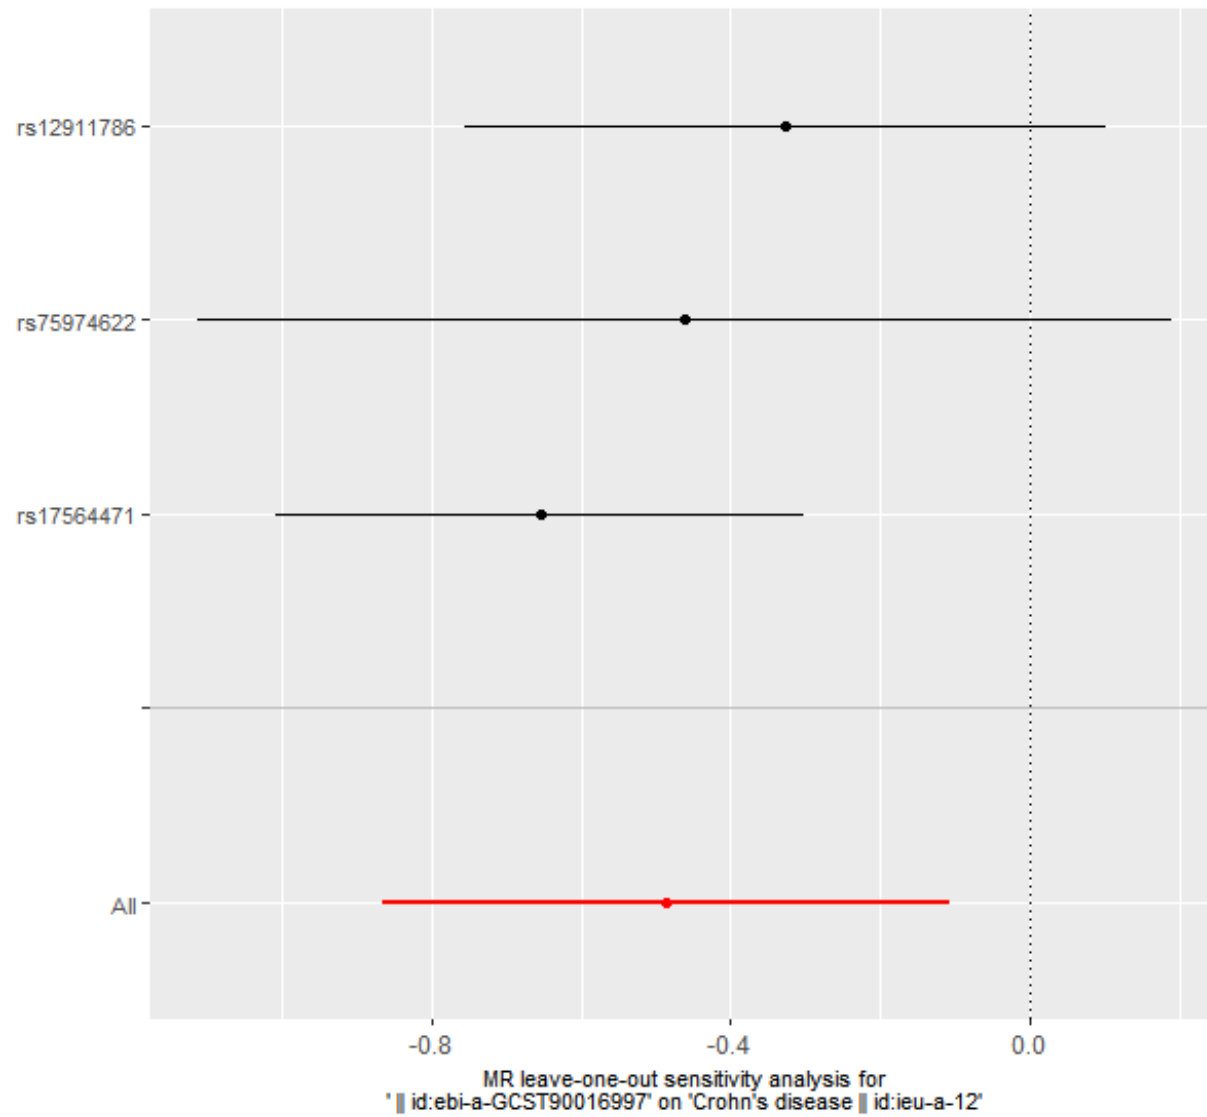

MR Method

- Inverse variance weighted
- MR Egger

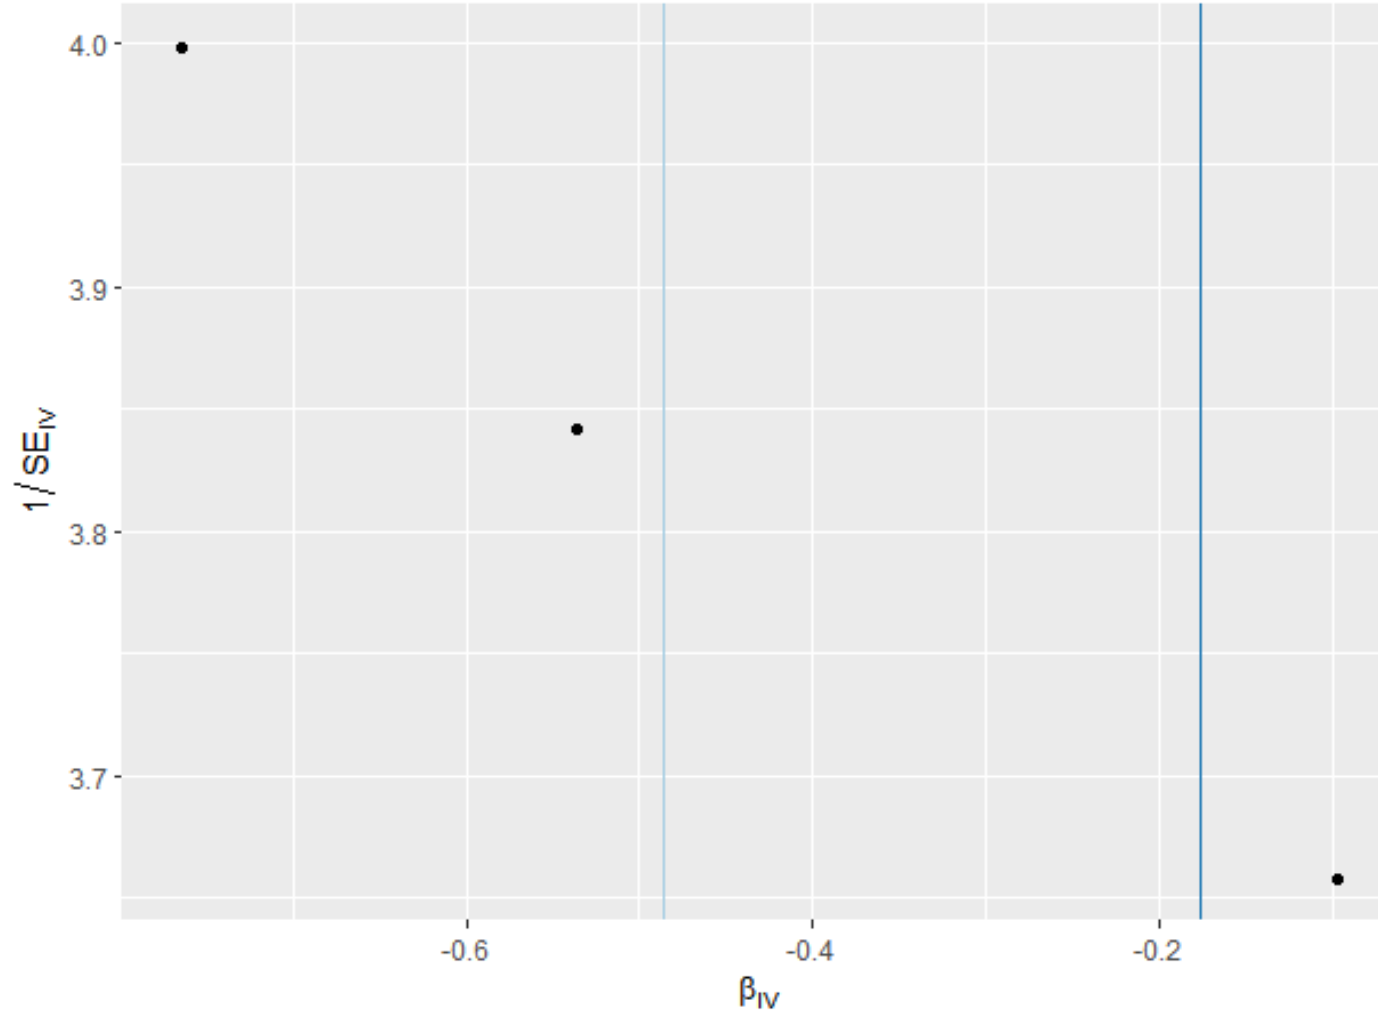

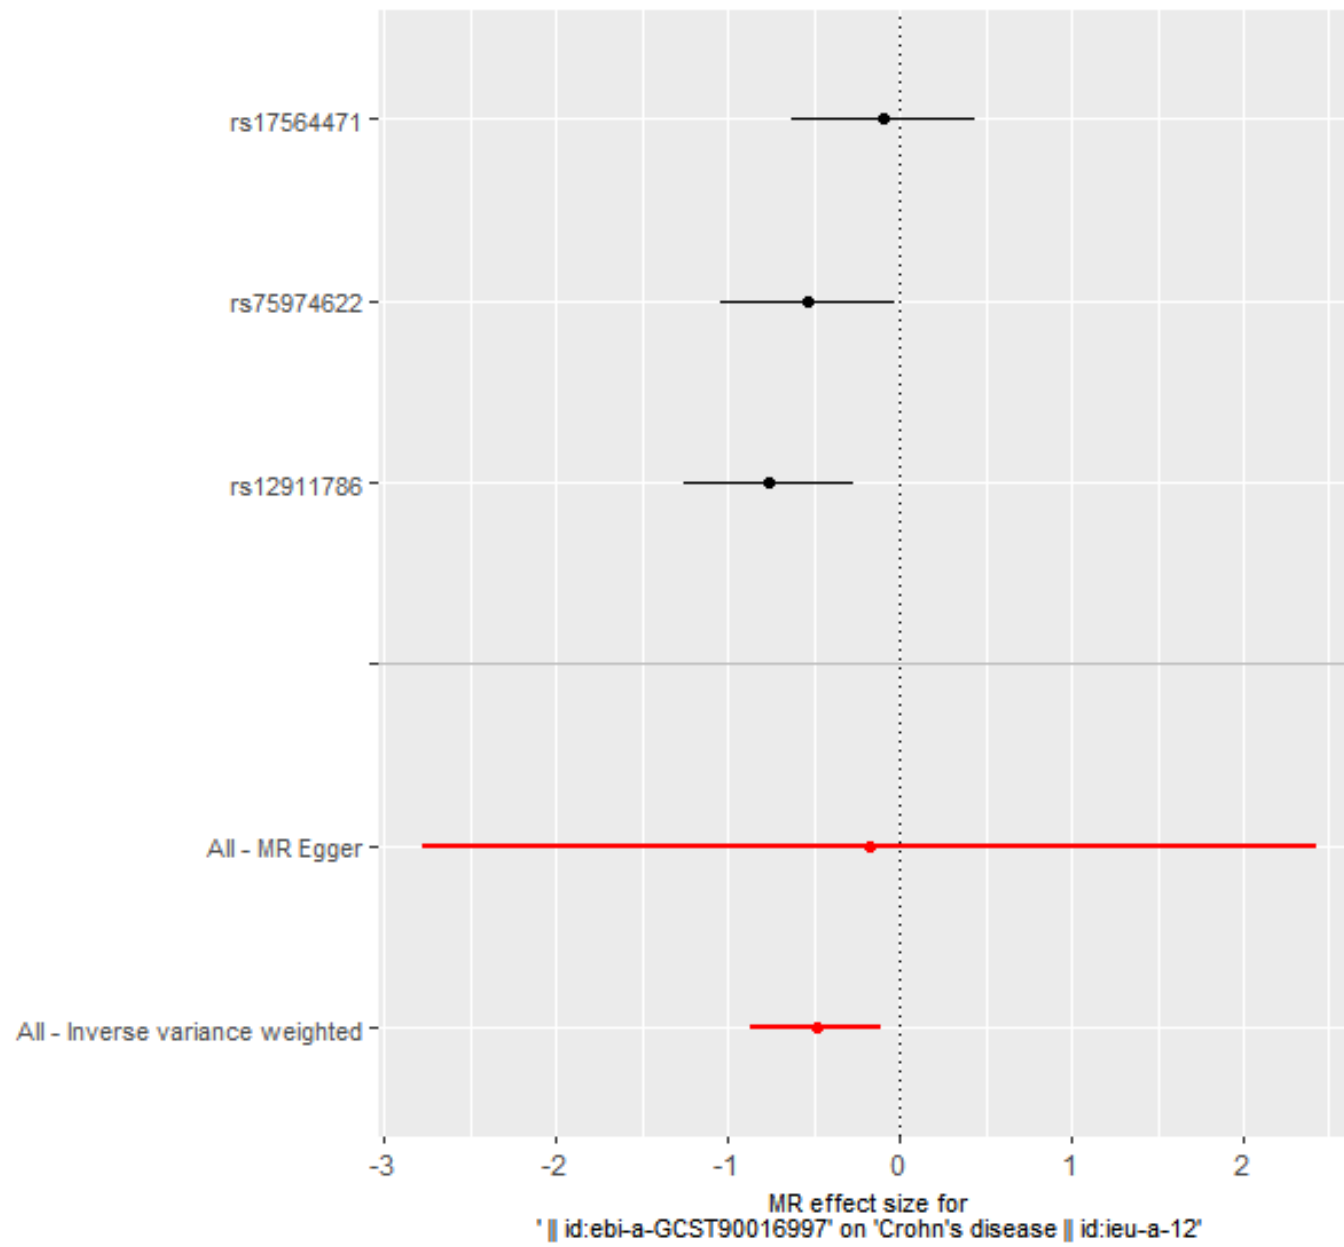

MR Test

- Inverse variance weighted
- MR Egger
- Simple mode
- Weighted median
- Weighted mode

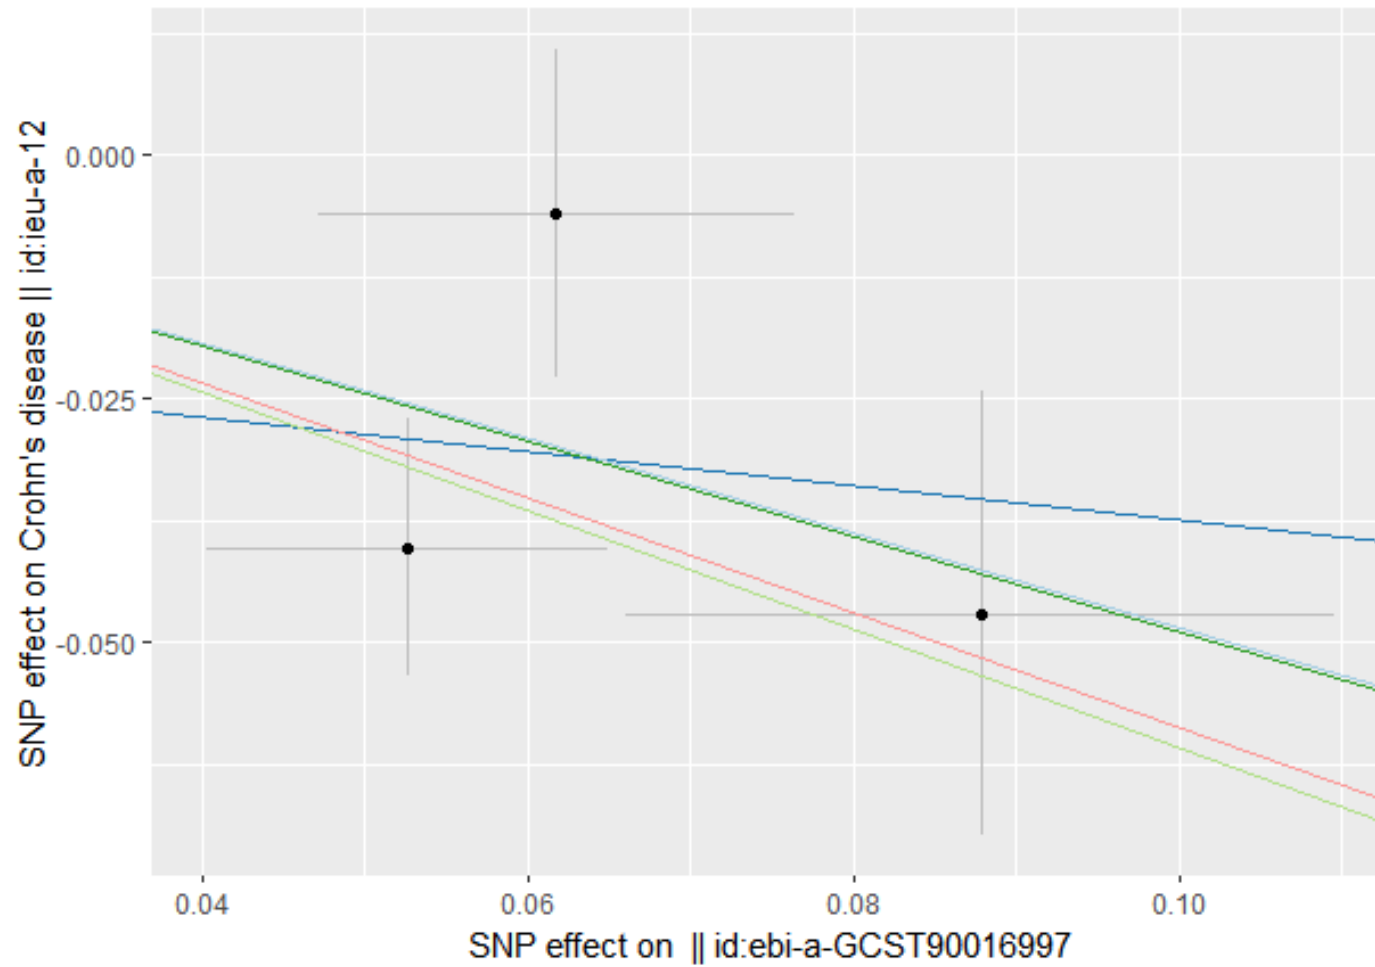

**Figure 118** Leave-one-out analysis, funnel plot, MR effect size and scatter plot for gut microbiota abundance (genus *Eubacterium fissicatena* group id.14373) on crohn's disease

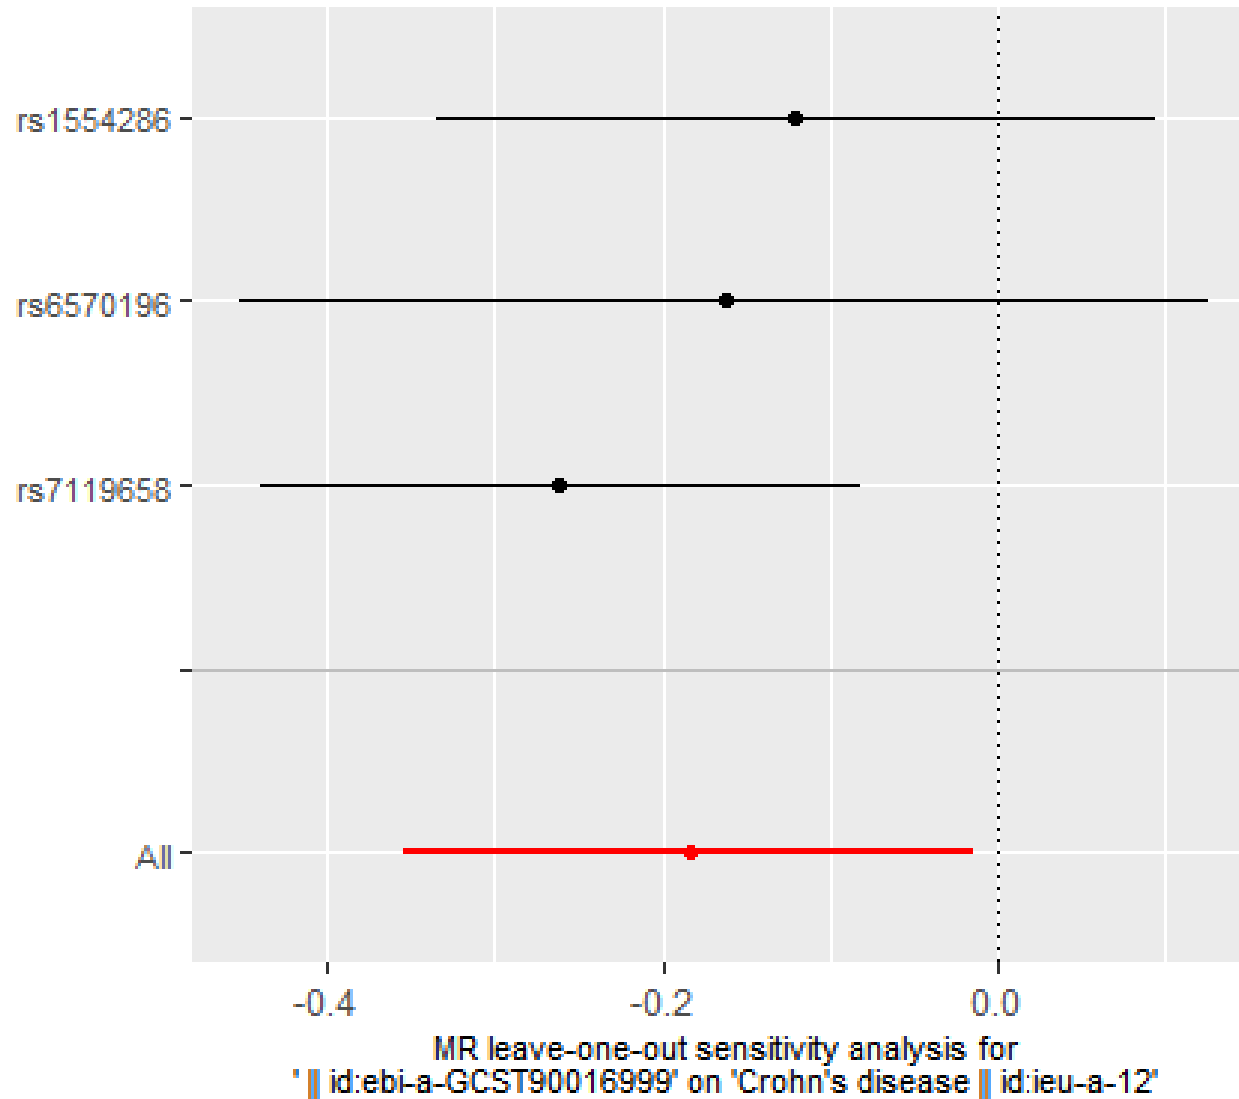

### MR Method

- Inverse variance weighted
- MR Egger

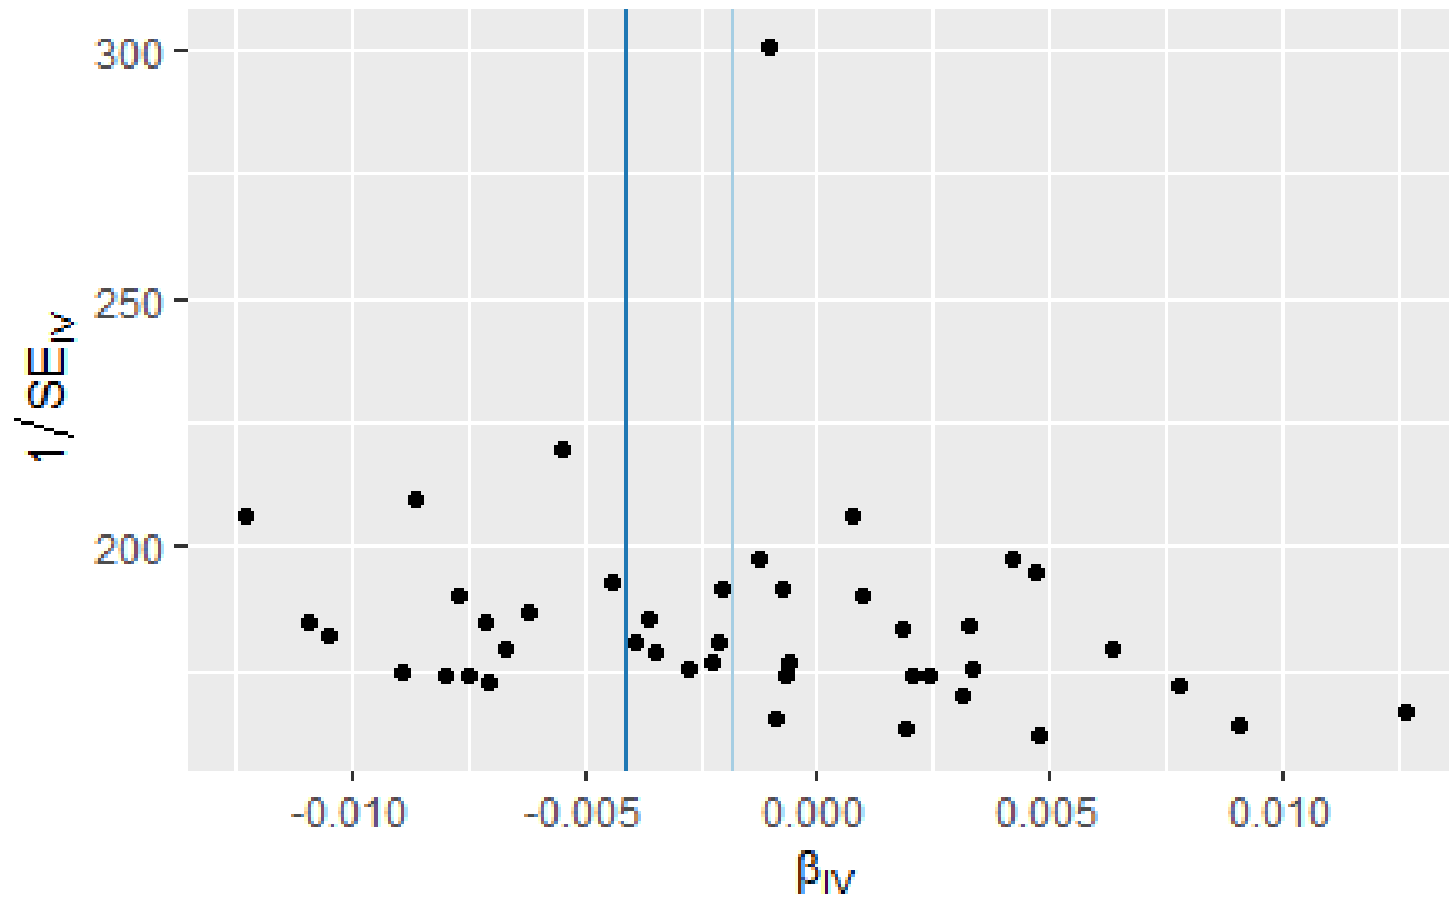

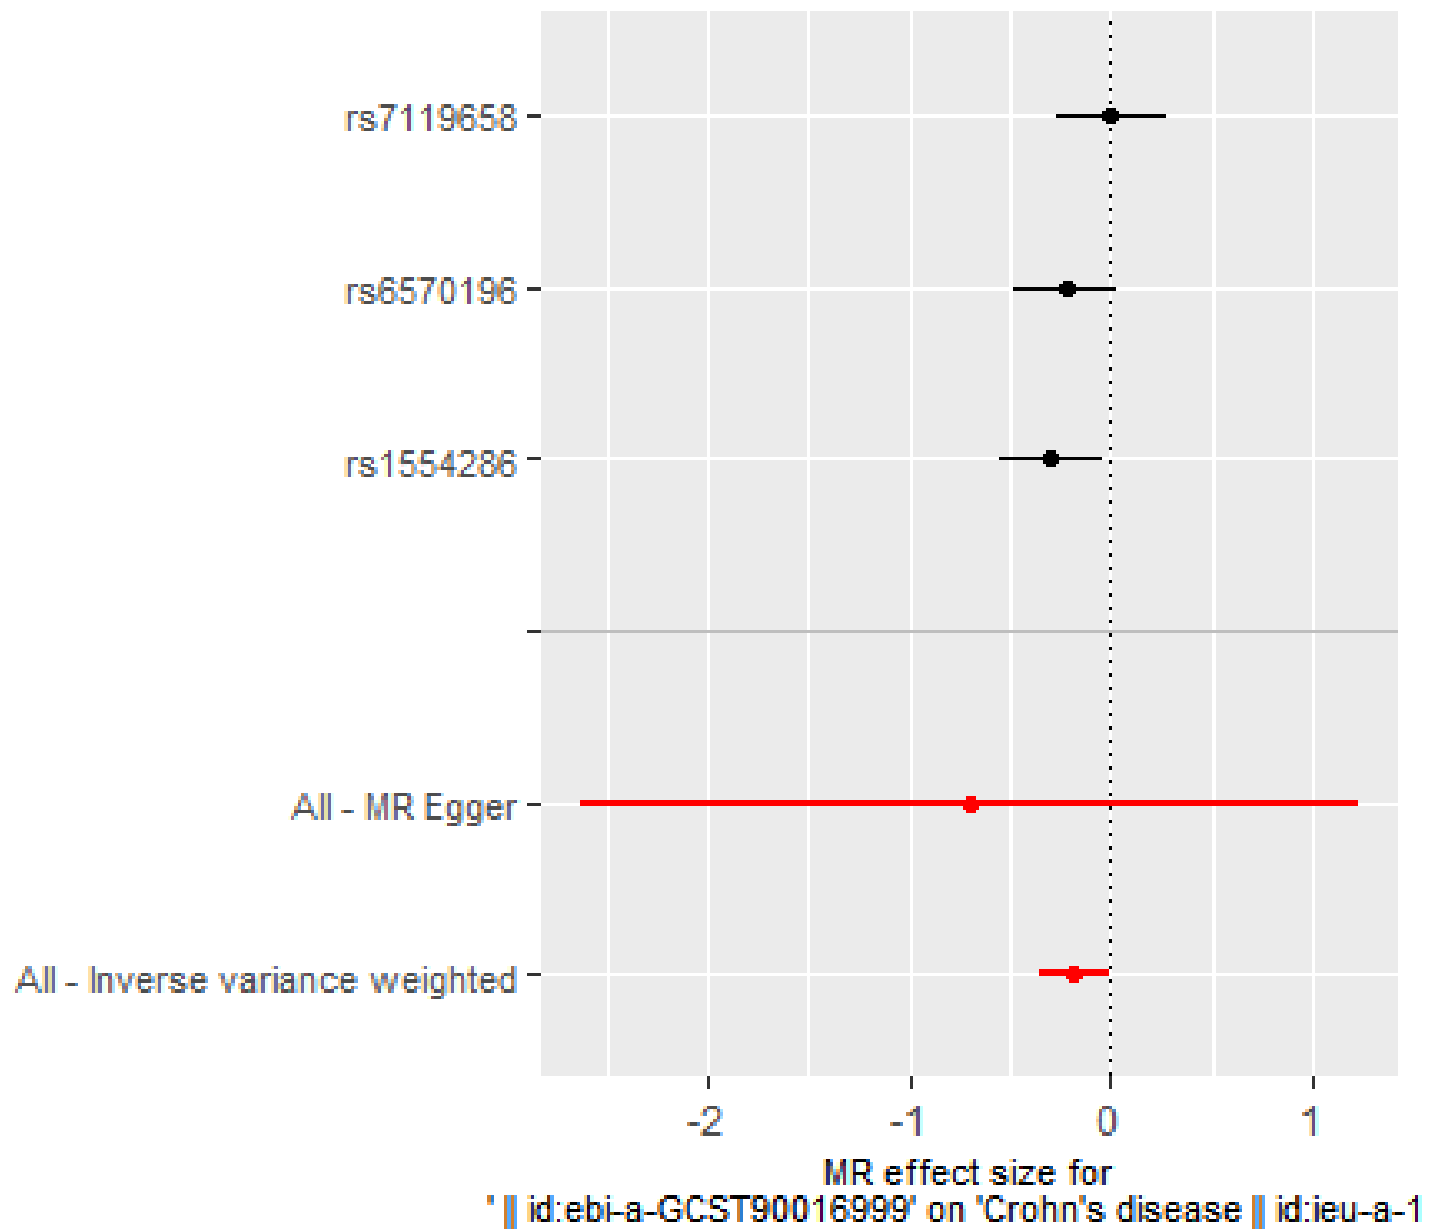

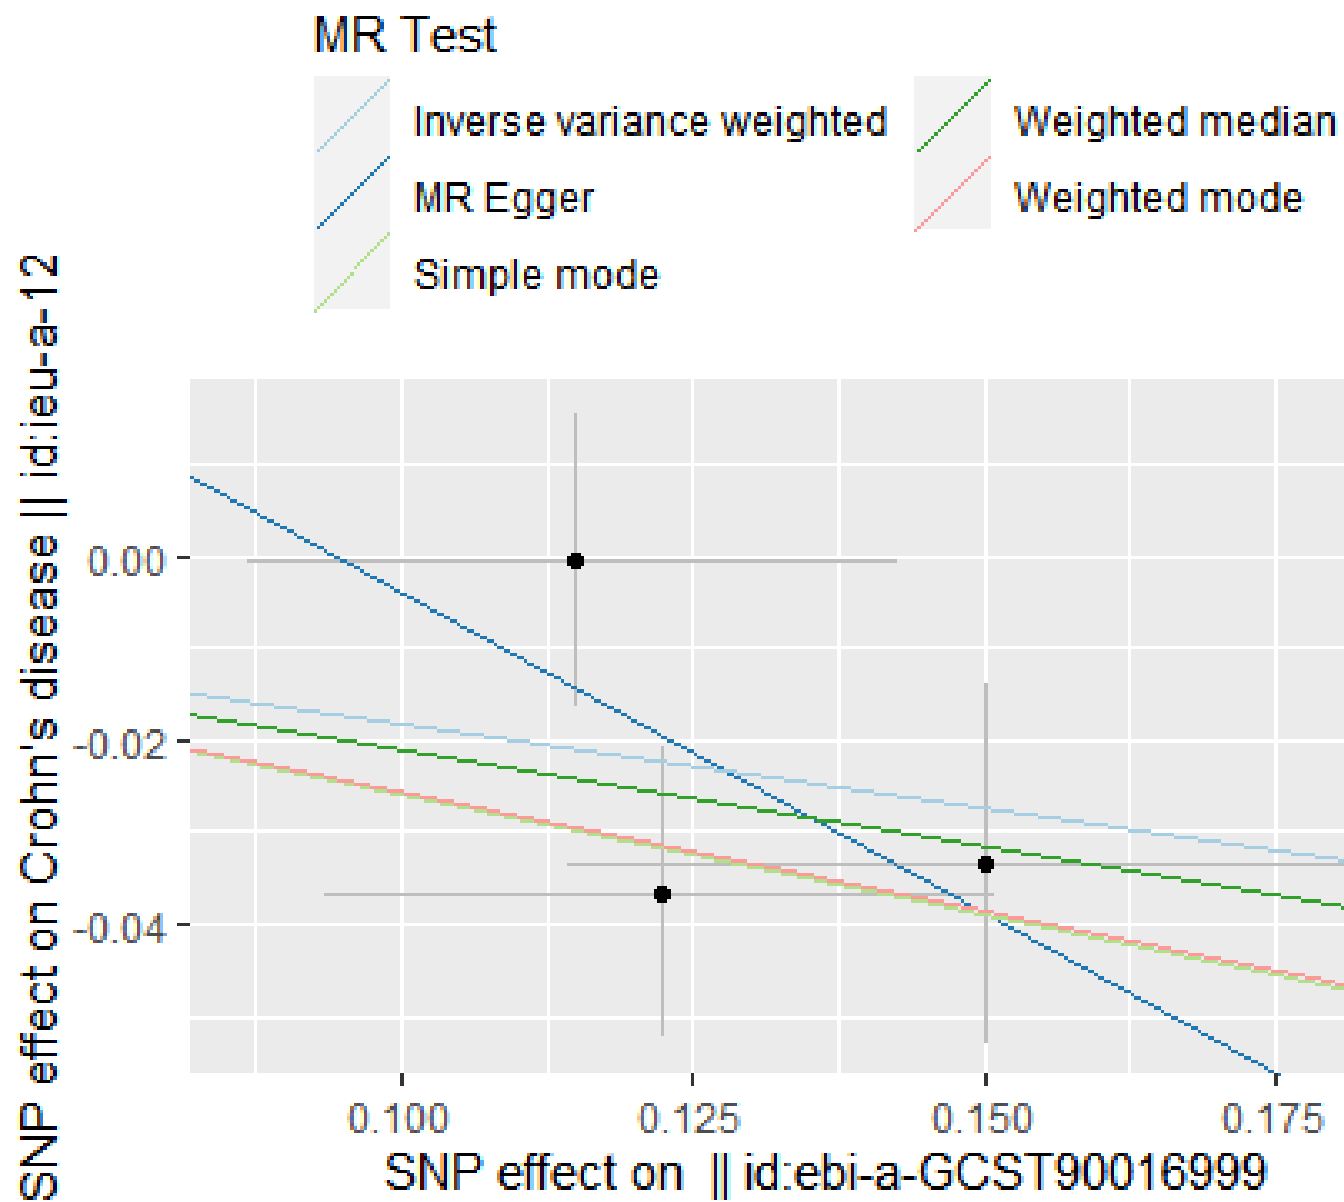



**Figure 119** Leave-one-out analysis, funnel plot, MR effect size and scatter plot for gut microbiota abundance (genus *Oscillospira* id.2064) on crohn's disease

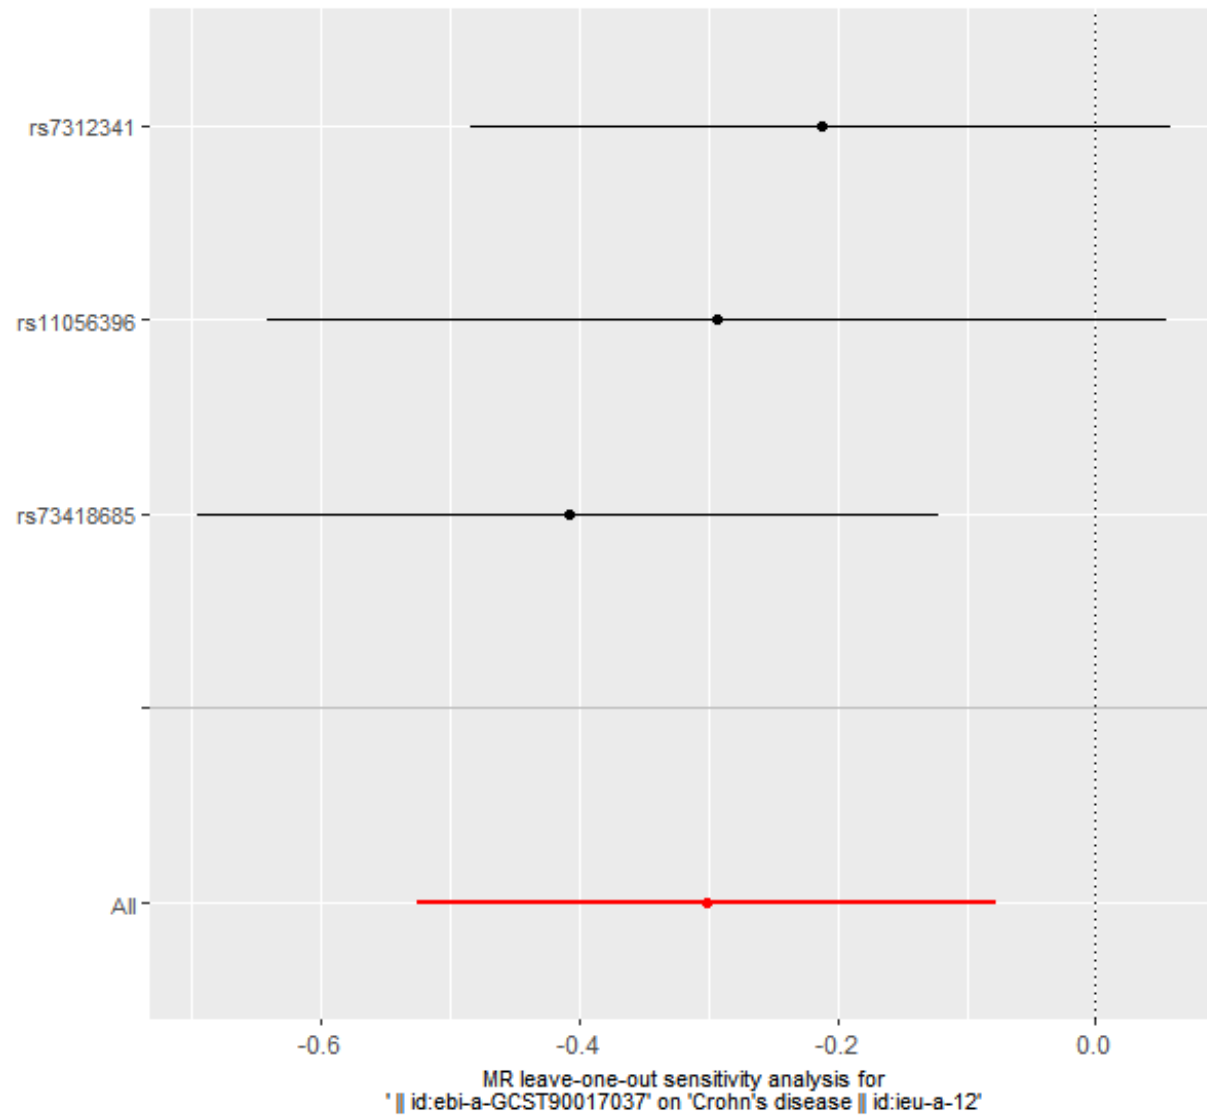

MR Method

- Inverse variance weighted
- MR Egger

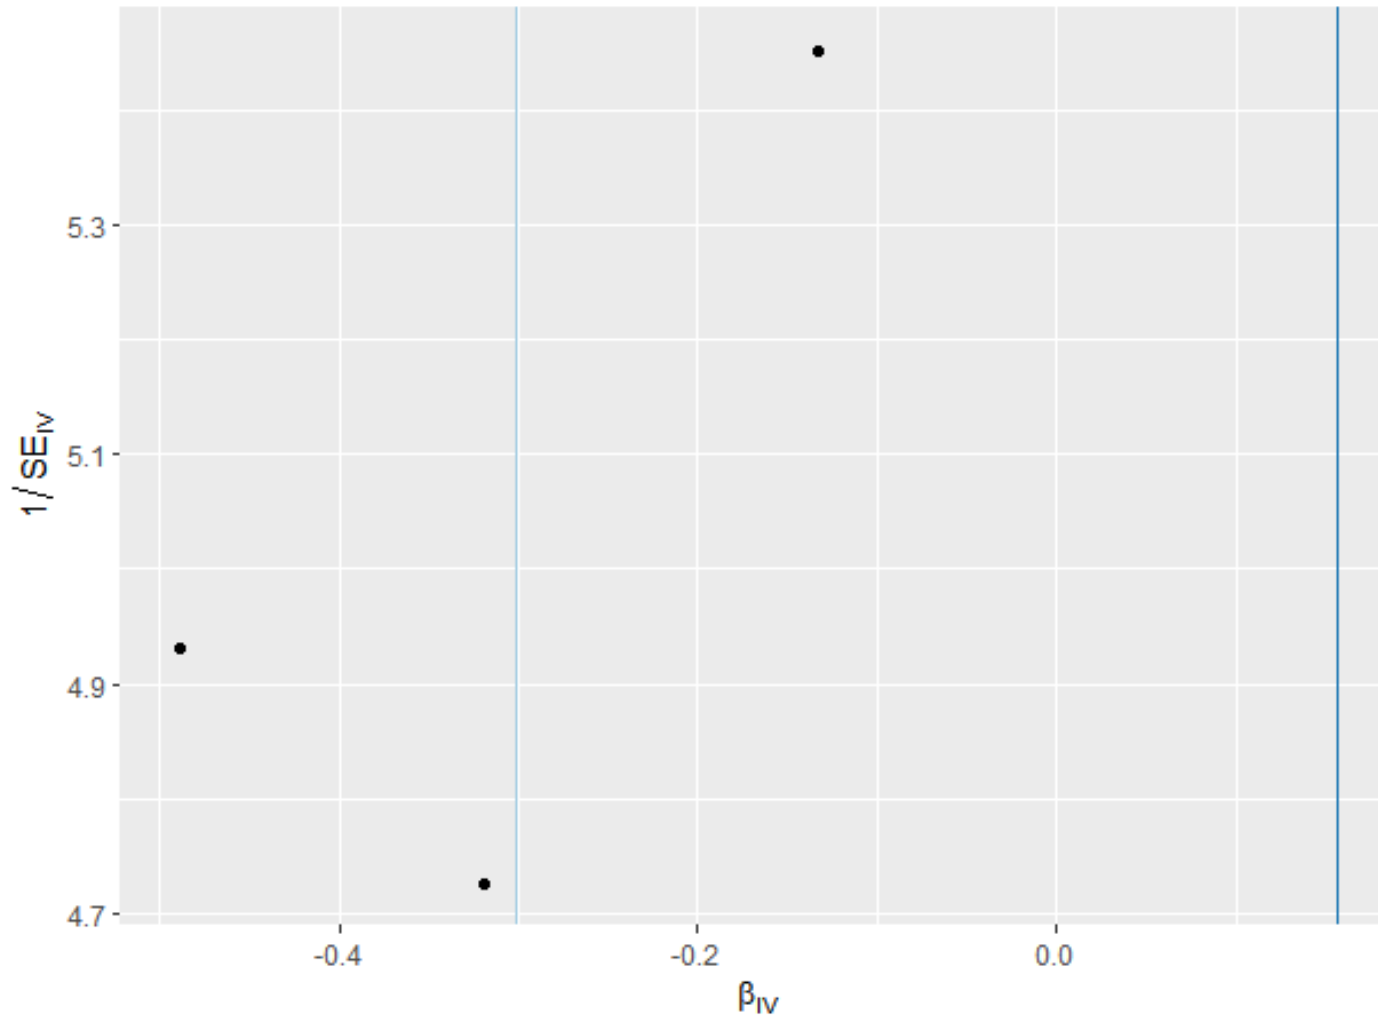

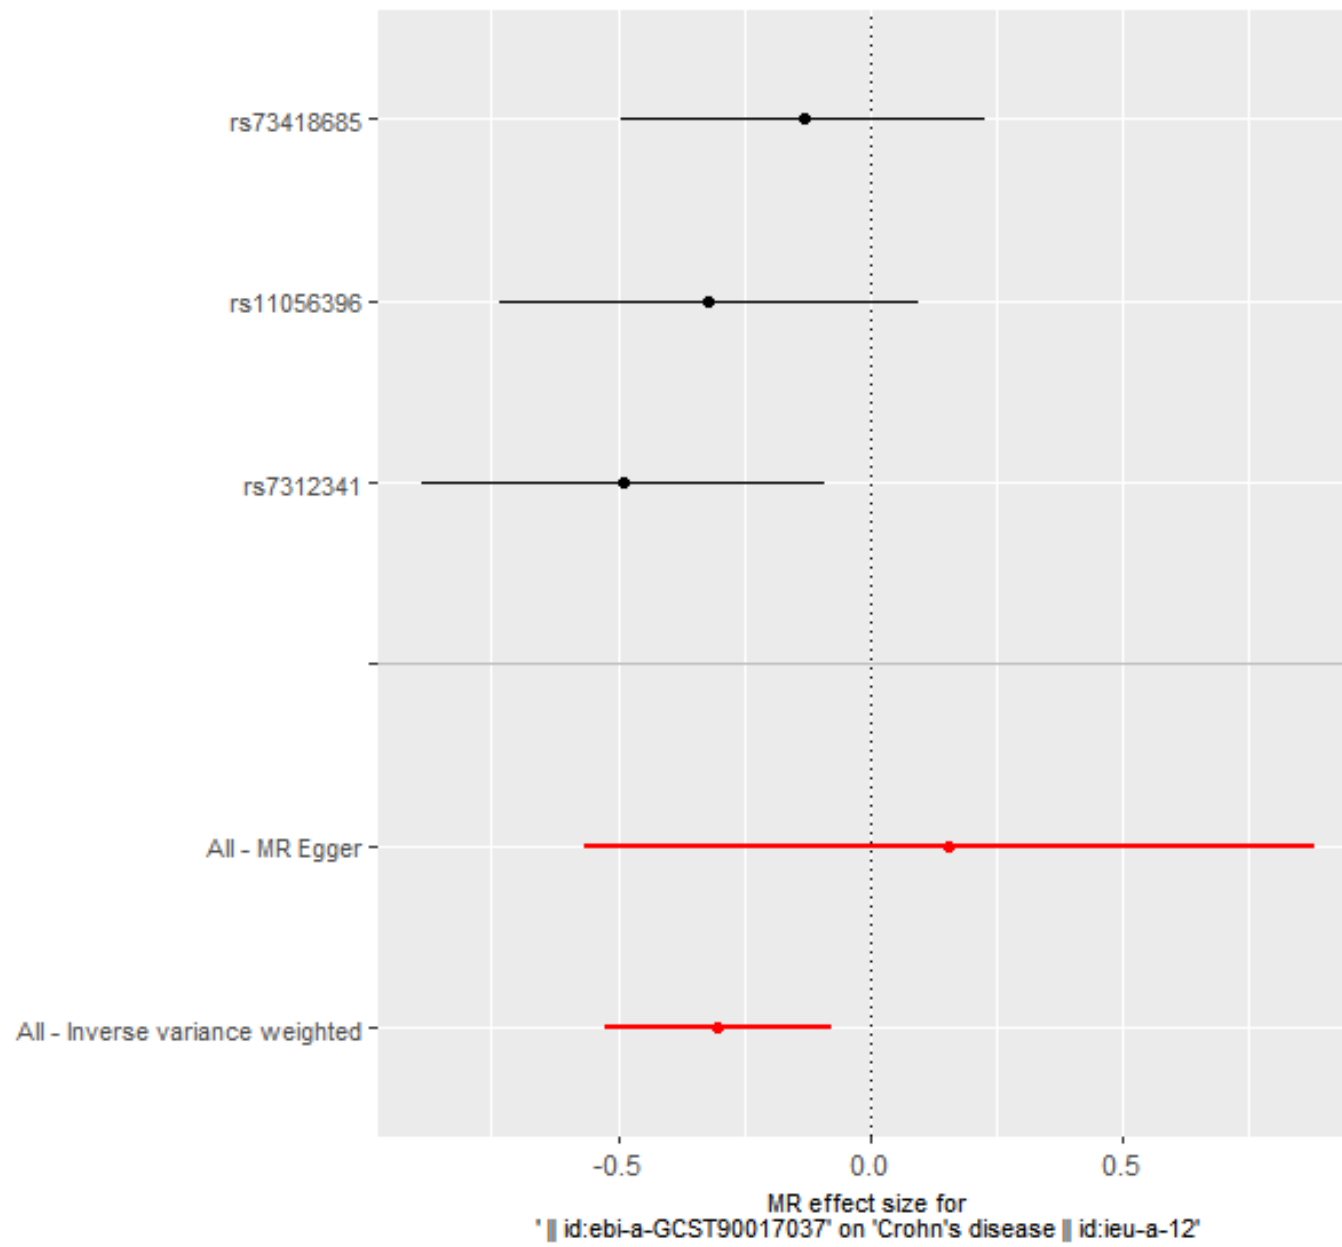

MR Test

- Inverse variance weighted
- MR Egger
- Simple mode
- Weighted median
- Weighted mode

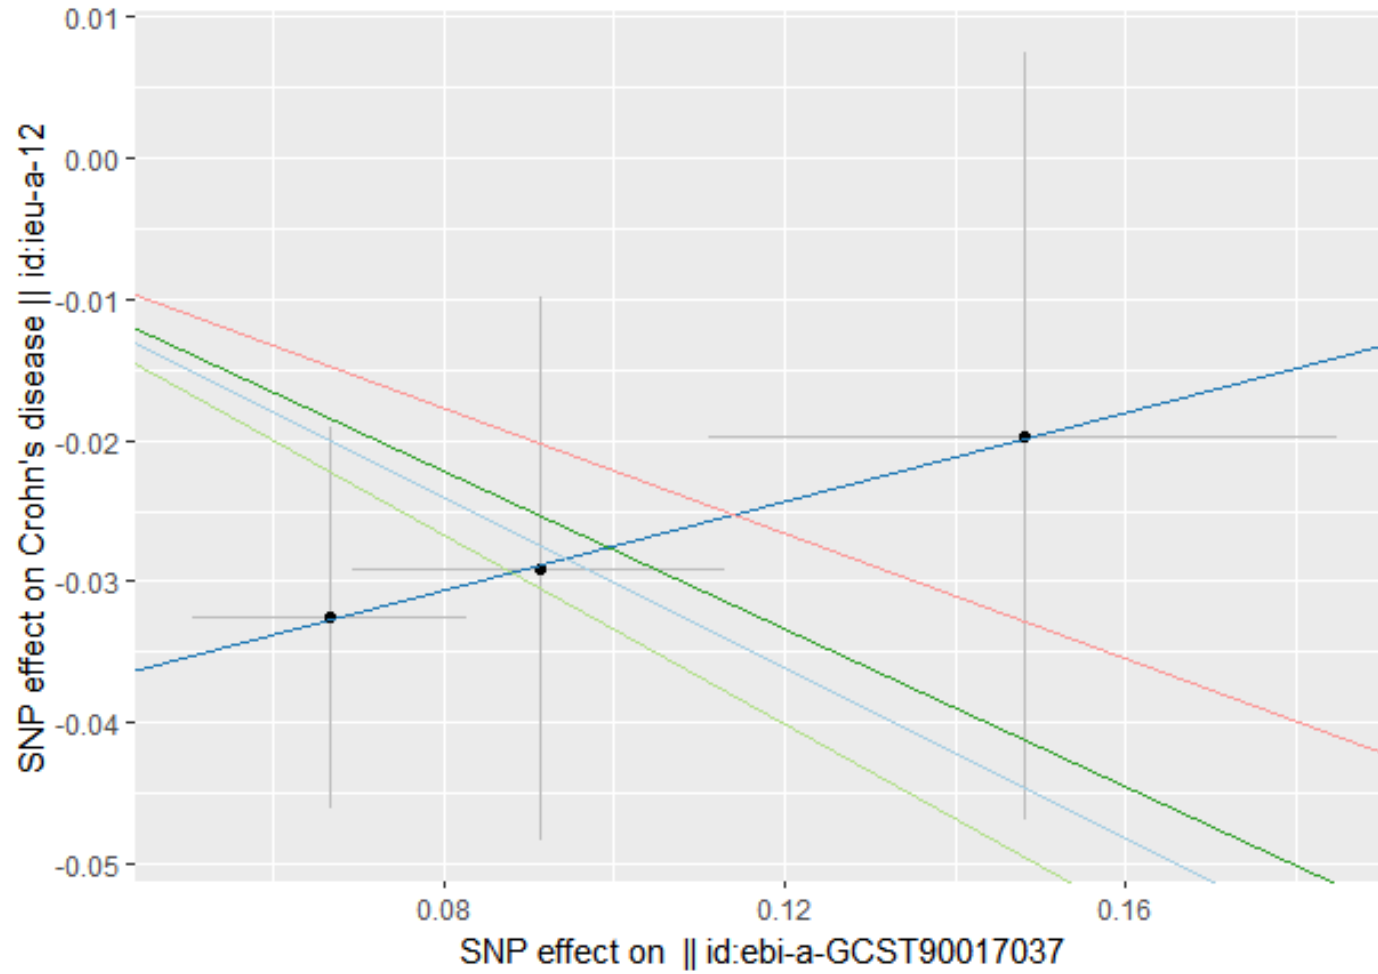

**Figure 120** Leave-one-out analysis, funnel plot, MR effect size and scatter plot for gut microbiota abundance (genus Ruminococcaceae UCG013 id.11370) on crohn's disease

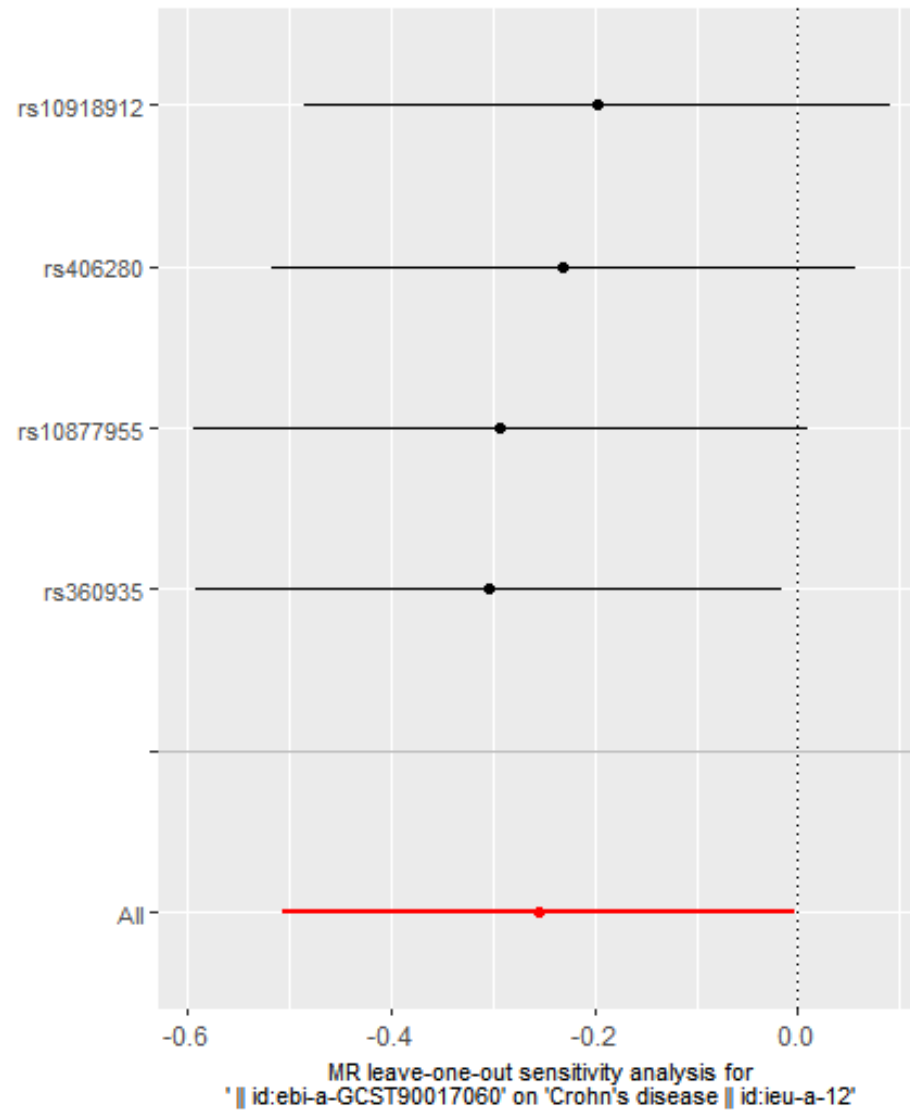

MR Method

- Inverse variance weighted
- MR Egger

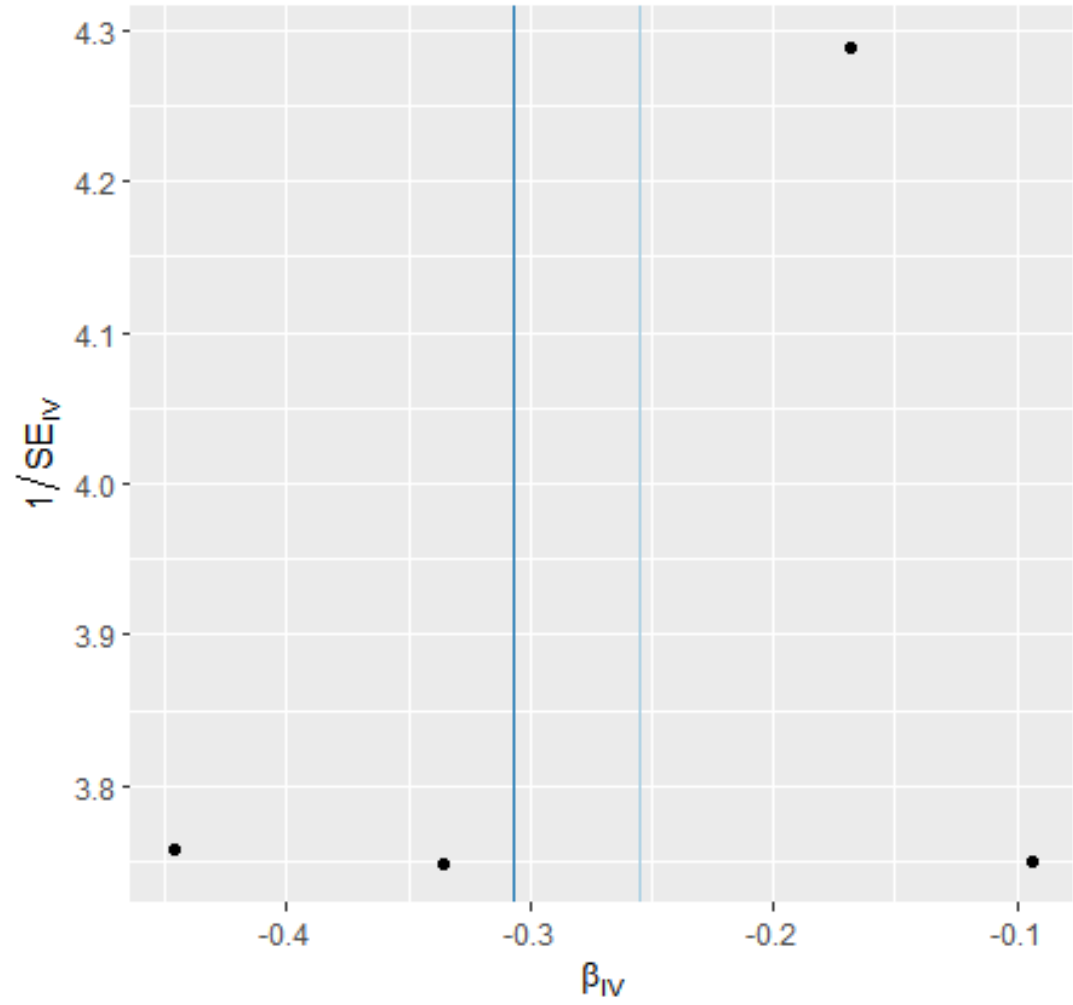

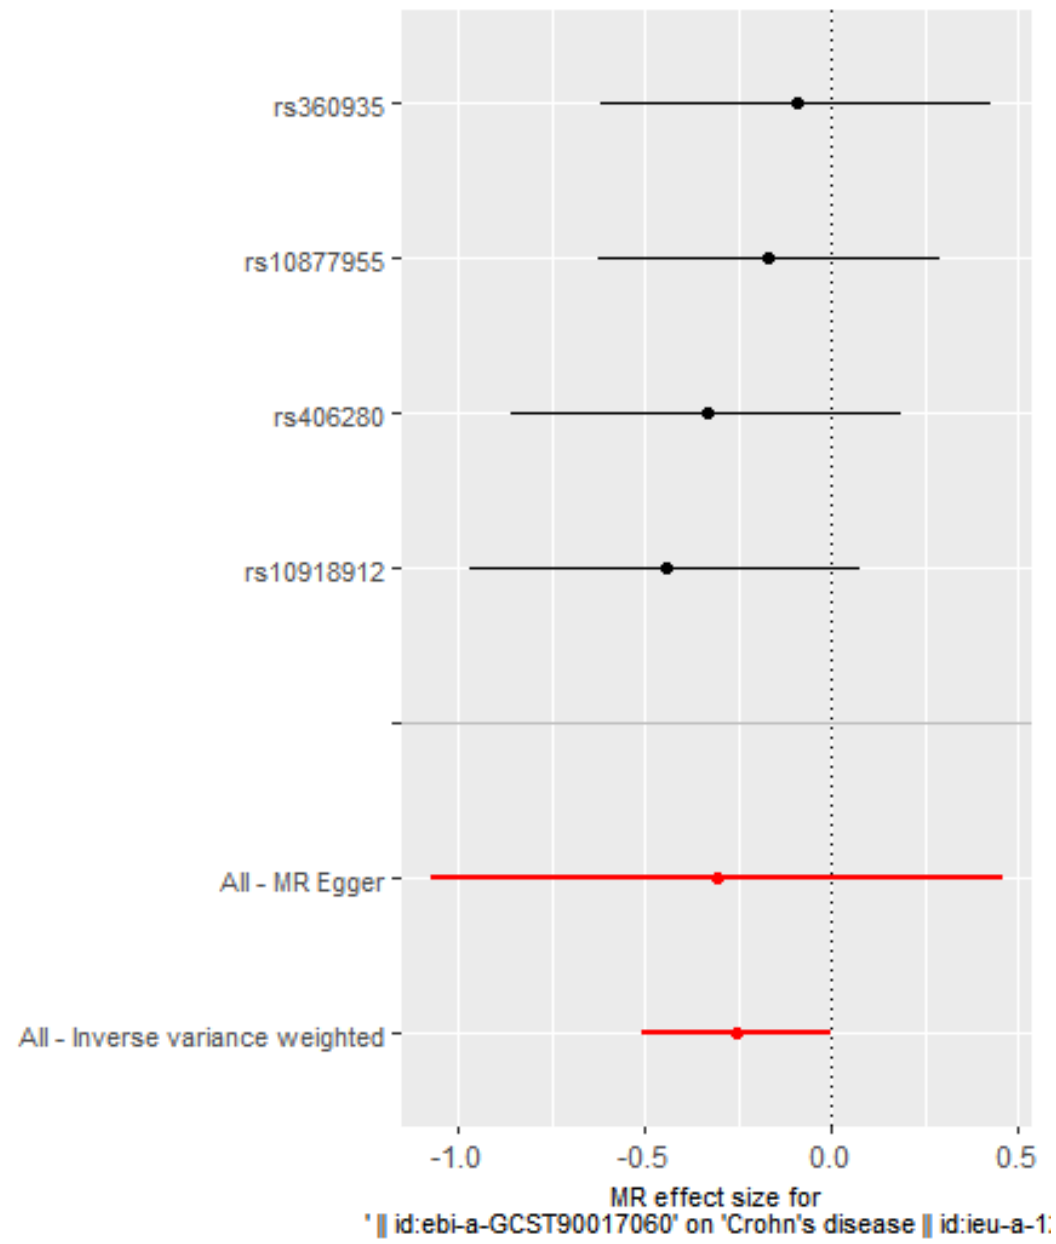

### MR Test

- Inverse variance weighted
- MR Egger
- Simple mode
- Weighted median
- Weighted mode

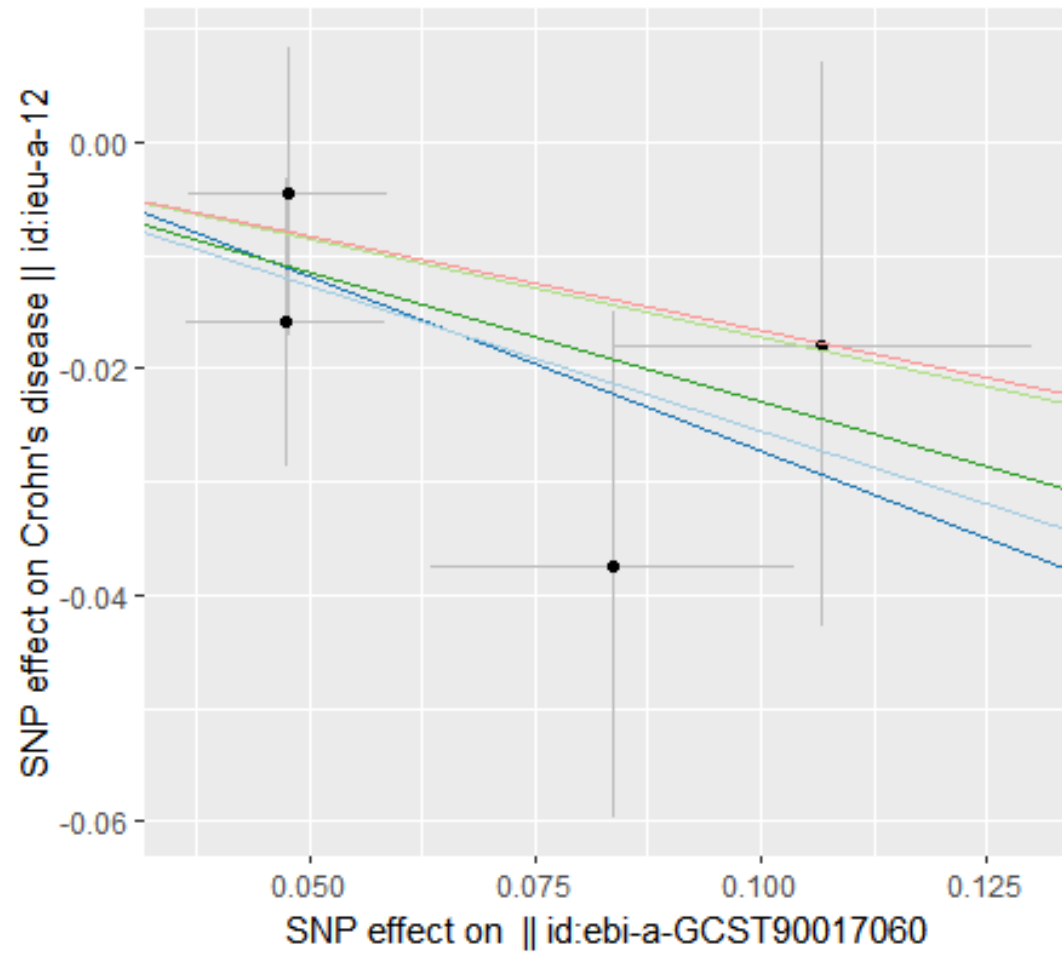



**Figure 121** Leave-one-out analysis, funnel plot, MR effect size and scatter plot for gut microbiota abundance (genus Ruminococcus torques group id.14377) on crohn's disease

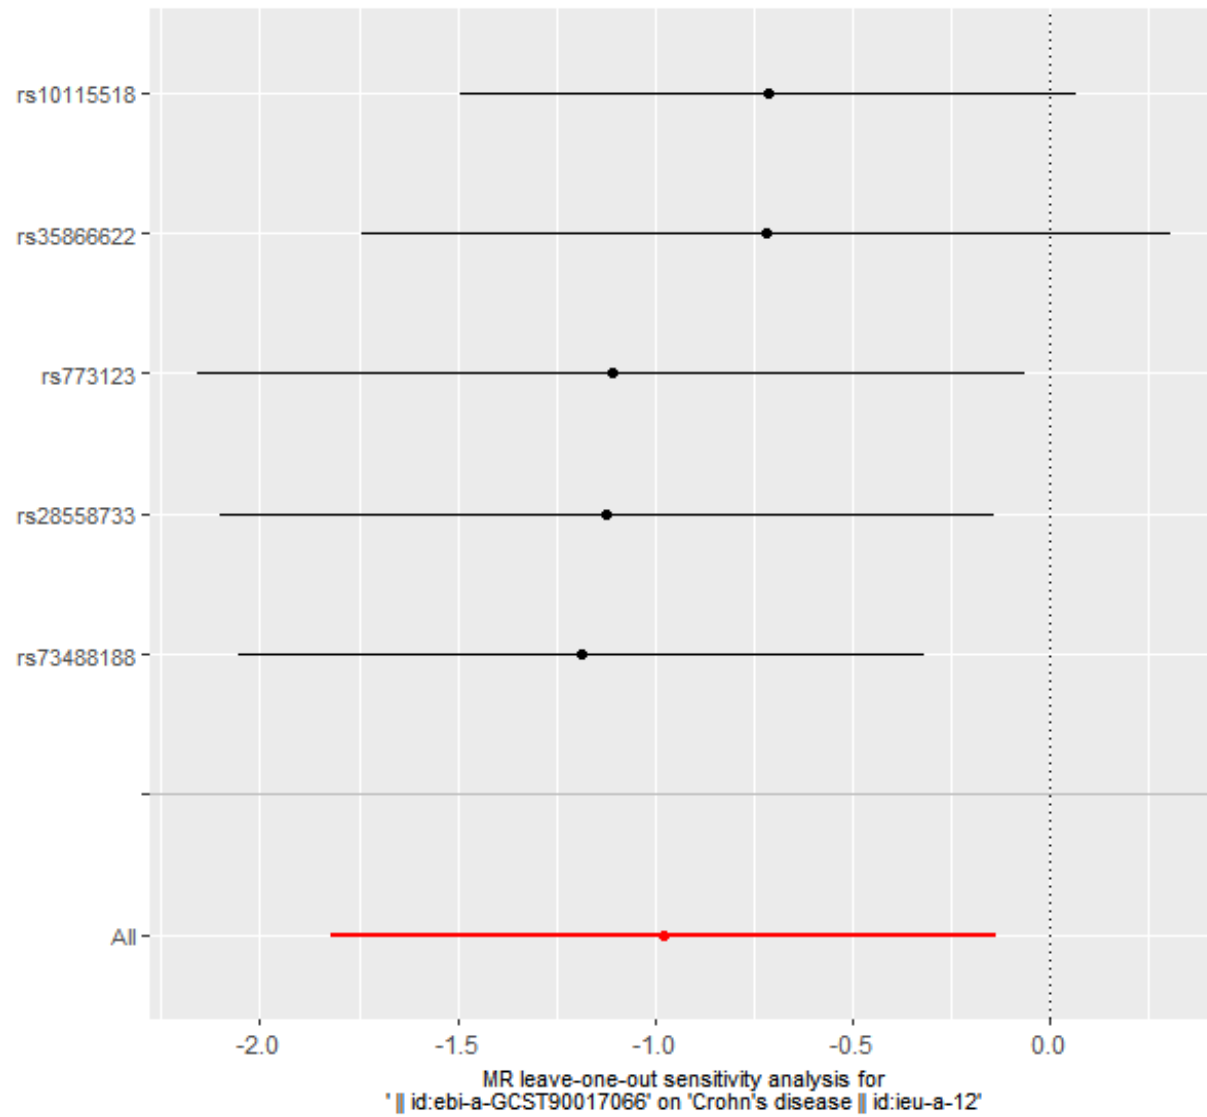

MR Method

- Inverse variance weighted
- MR Egger

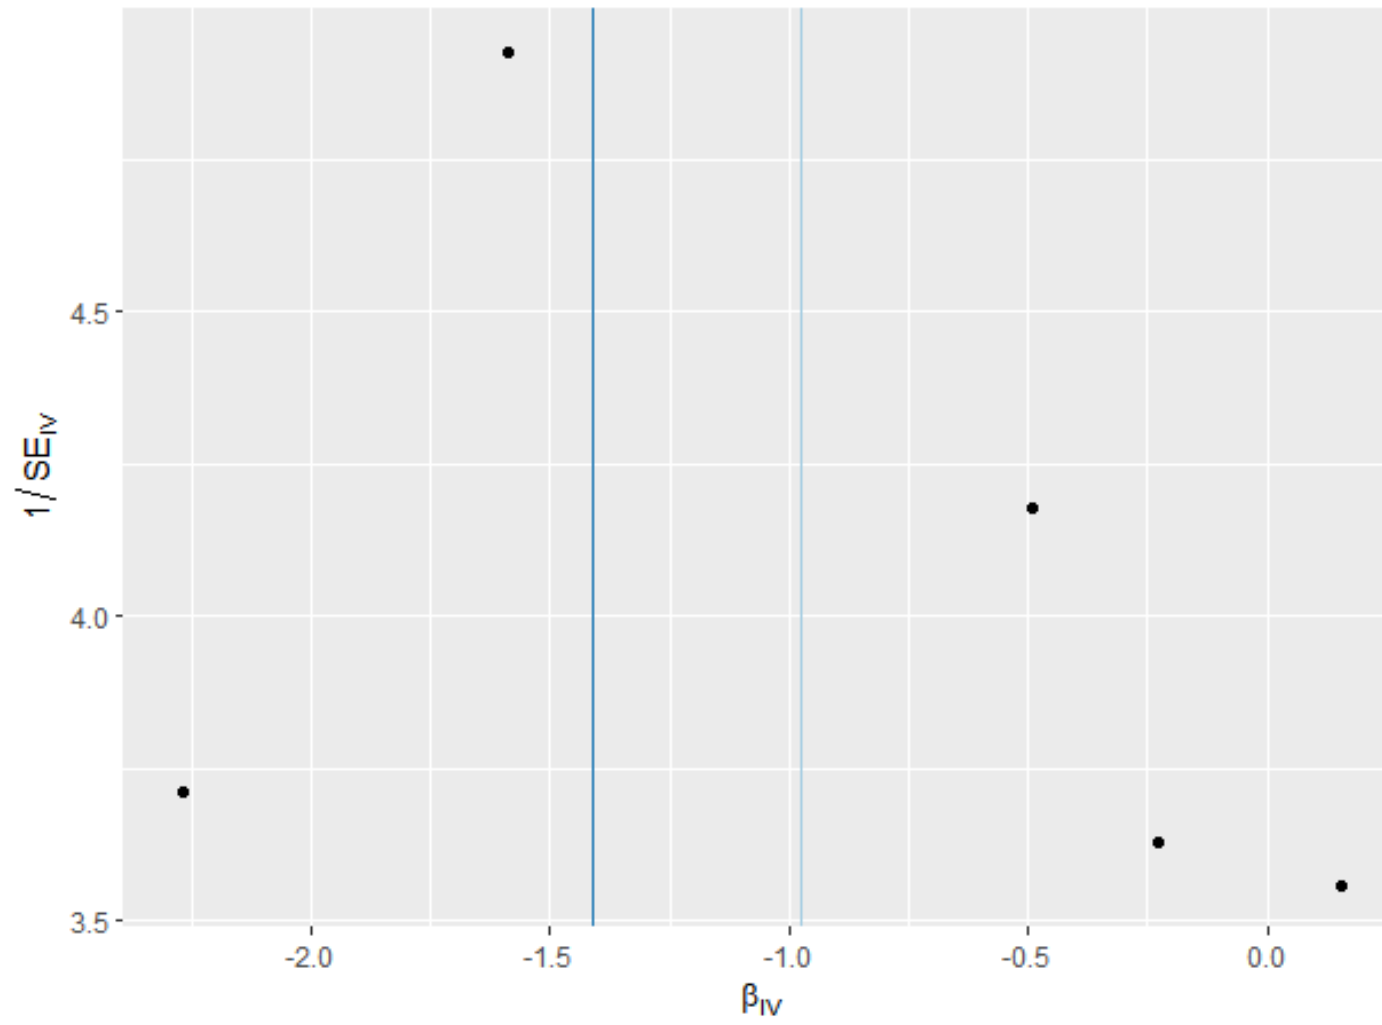

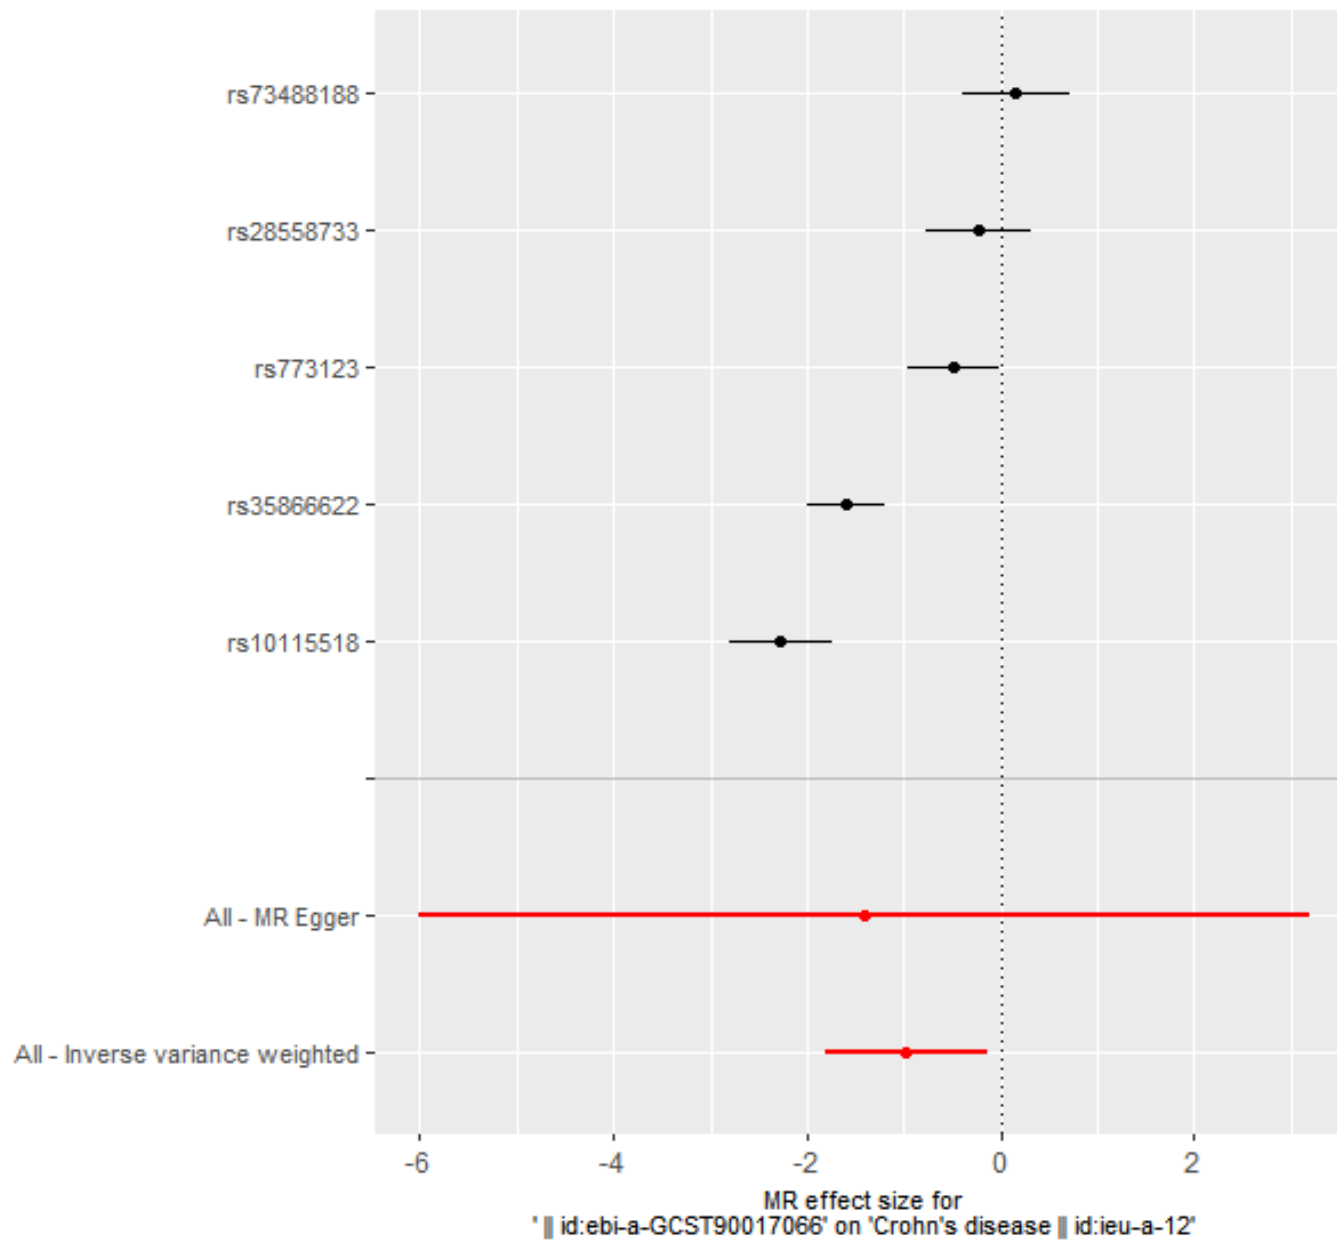

MR Test

- Inverse variance weighted
- MR Egger
- Simple mode
- Weighted median
- Weighted mode

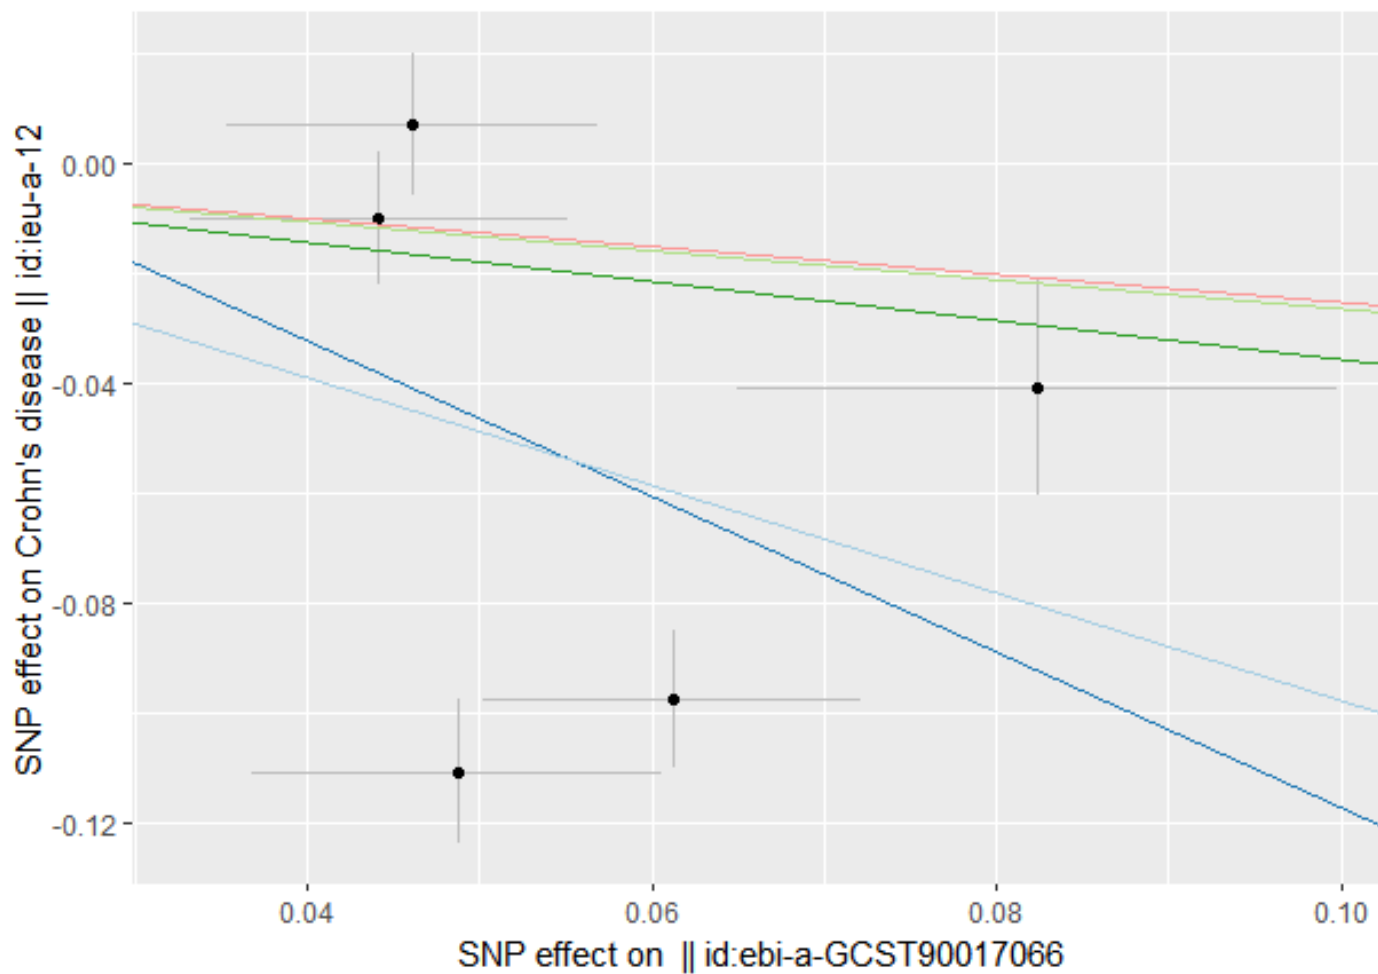

**Figure 122** Leave-one-out analysis, funnel plot, MR effect size and scatter plot for gut microbiota abundance (unknown genus id.1000006162) on crohn's disease

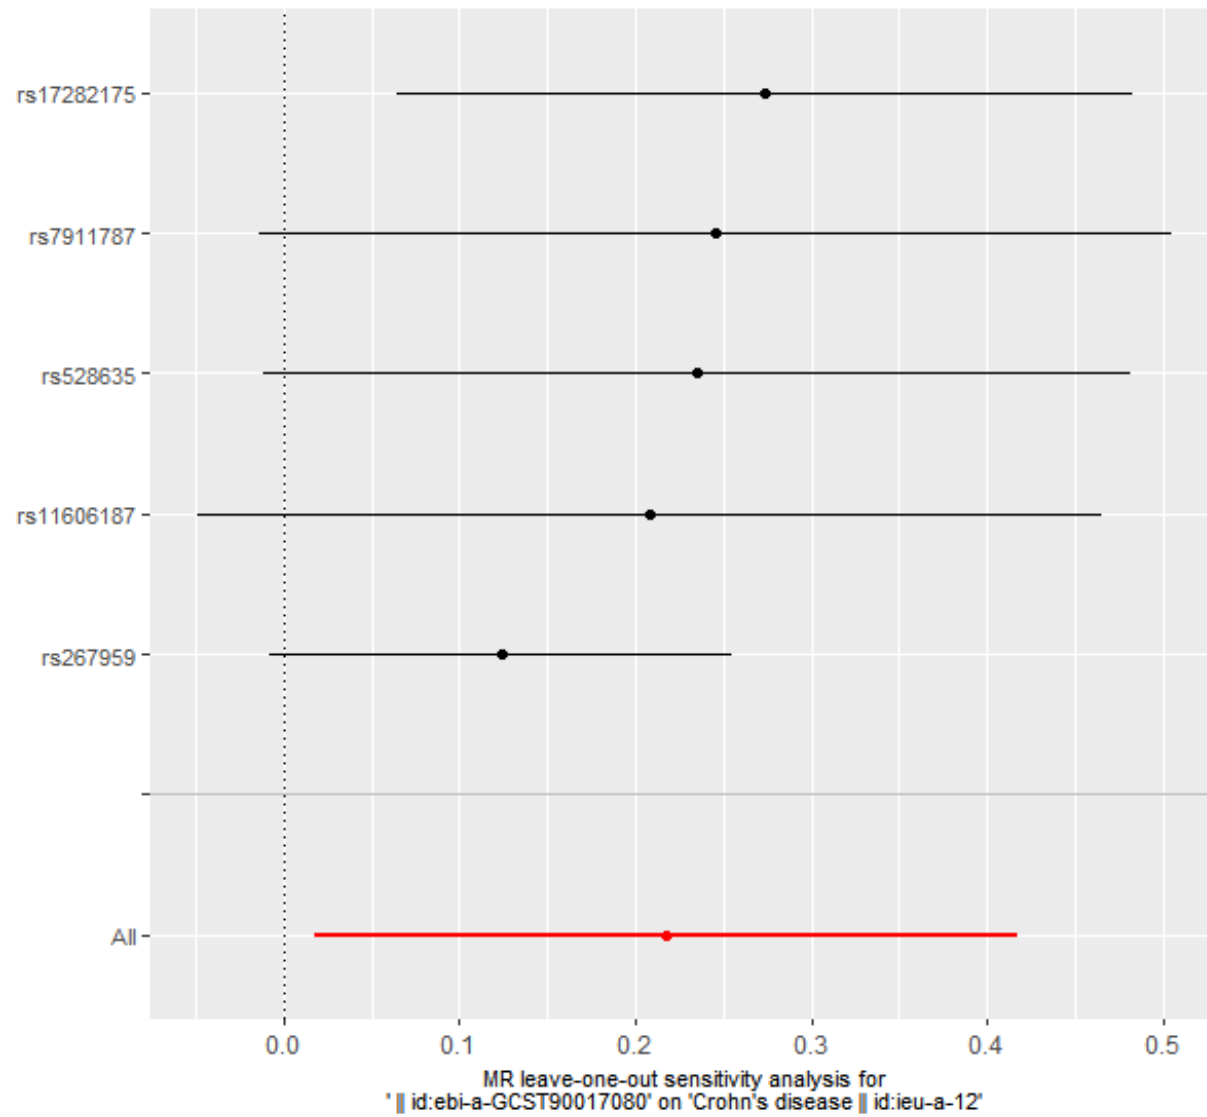

MR Method

- Inverse variance weighted
- MR Egger

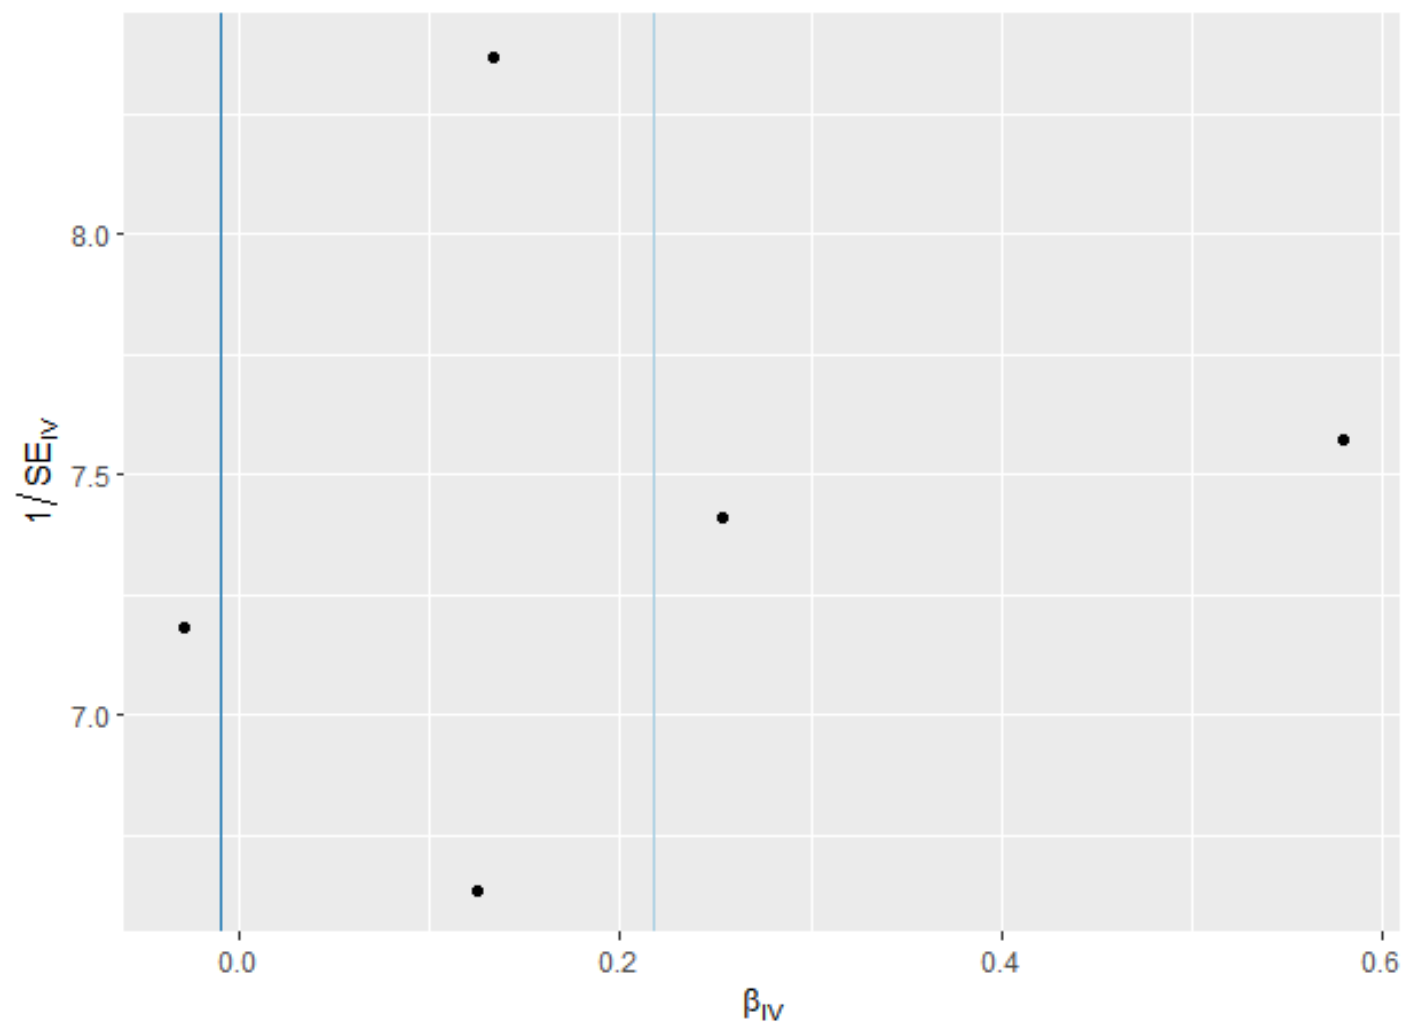

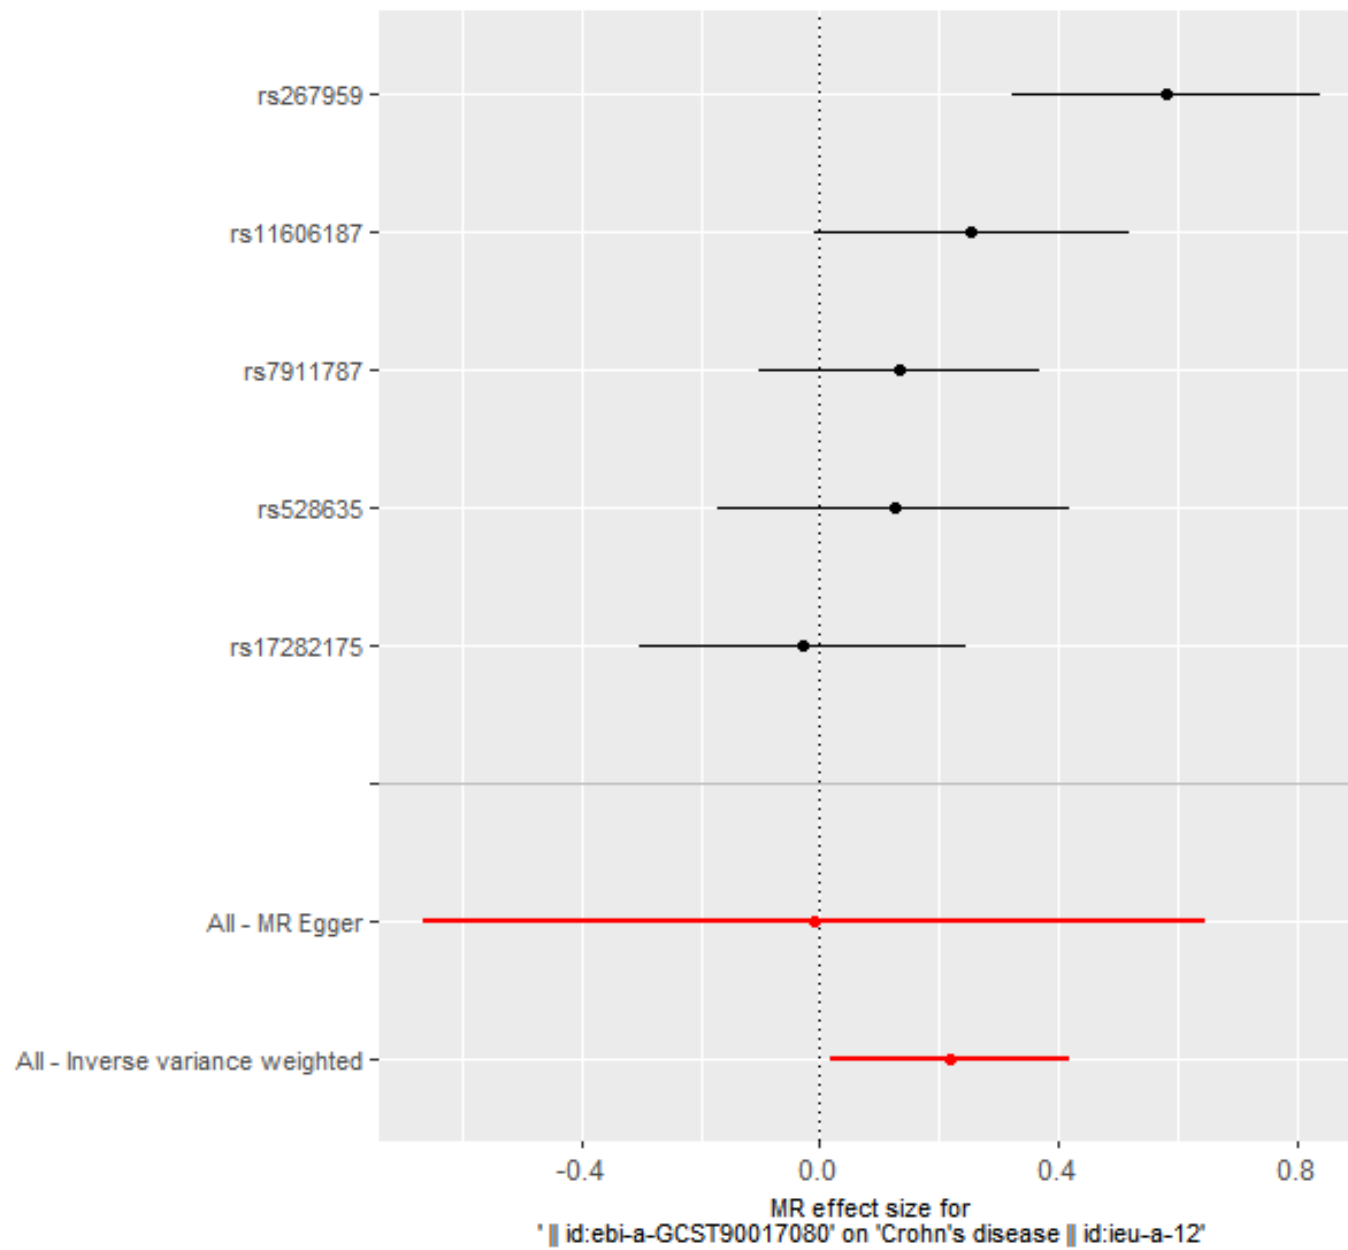

MR Test

- Inverse variance weighted
- MR Egger
- Simple mode
- Weighted median
- Weighted mode

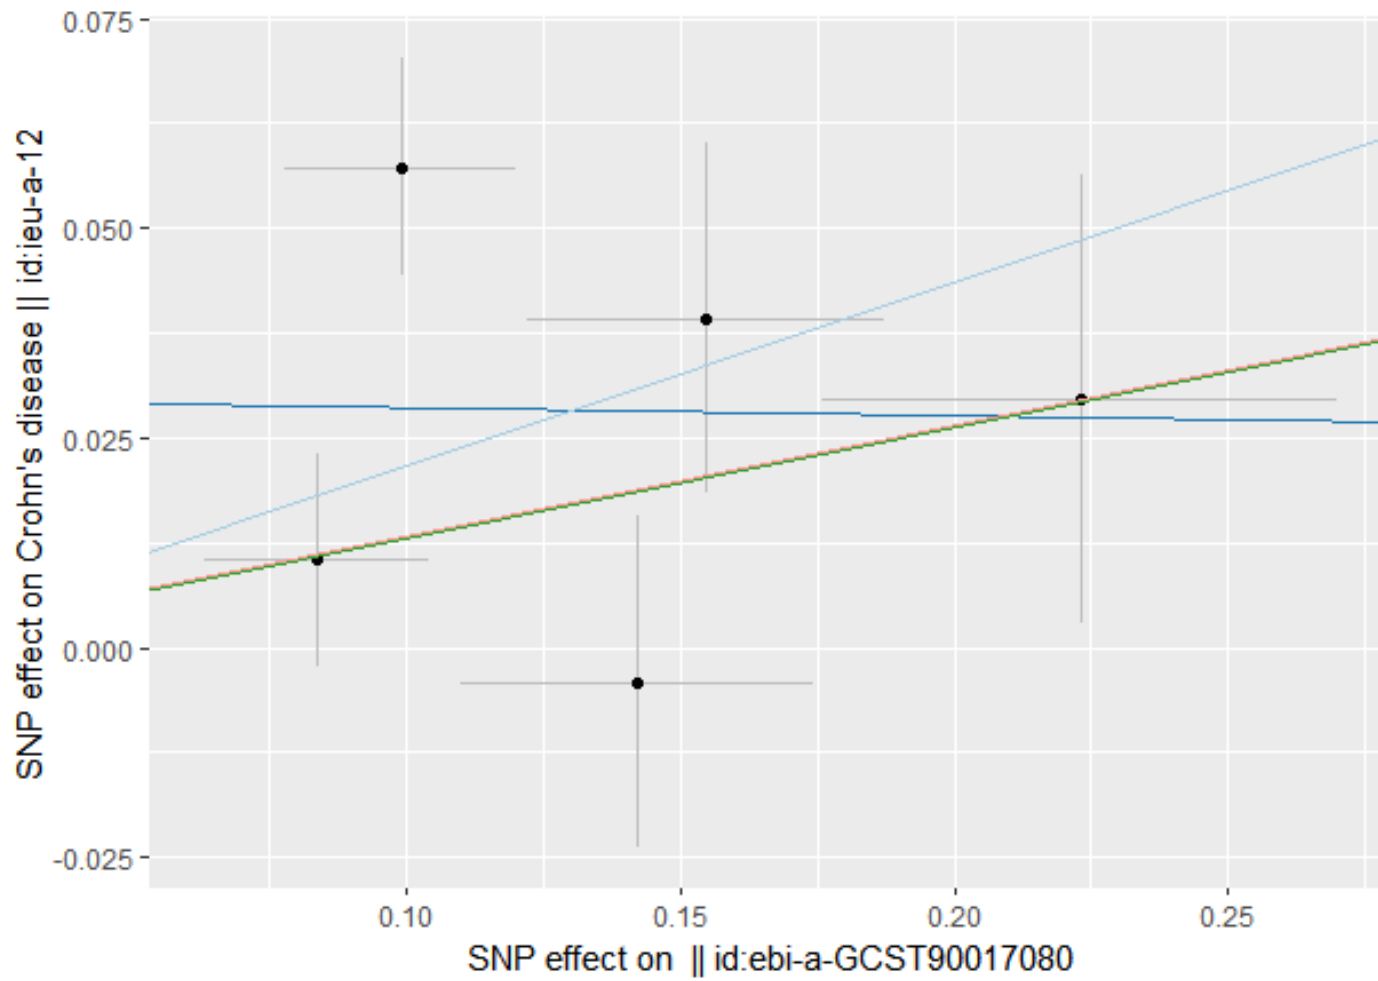



**Figure 123** Leave-one-out analysis, funnel plot, MR effect size and scatter plot for gut microbiota abundance (unknown genus id.2001) on crohn's disease

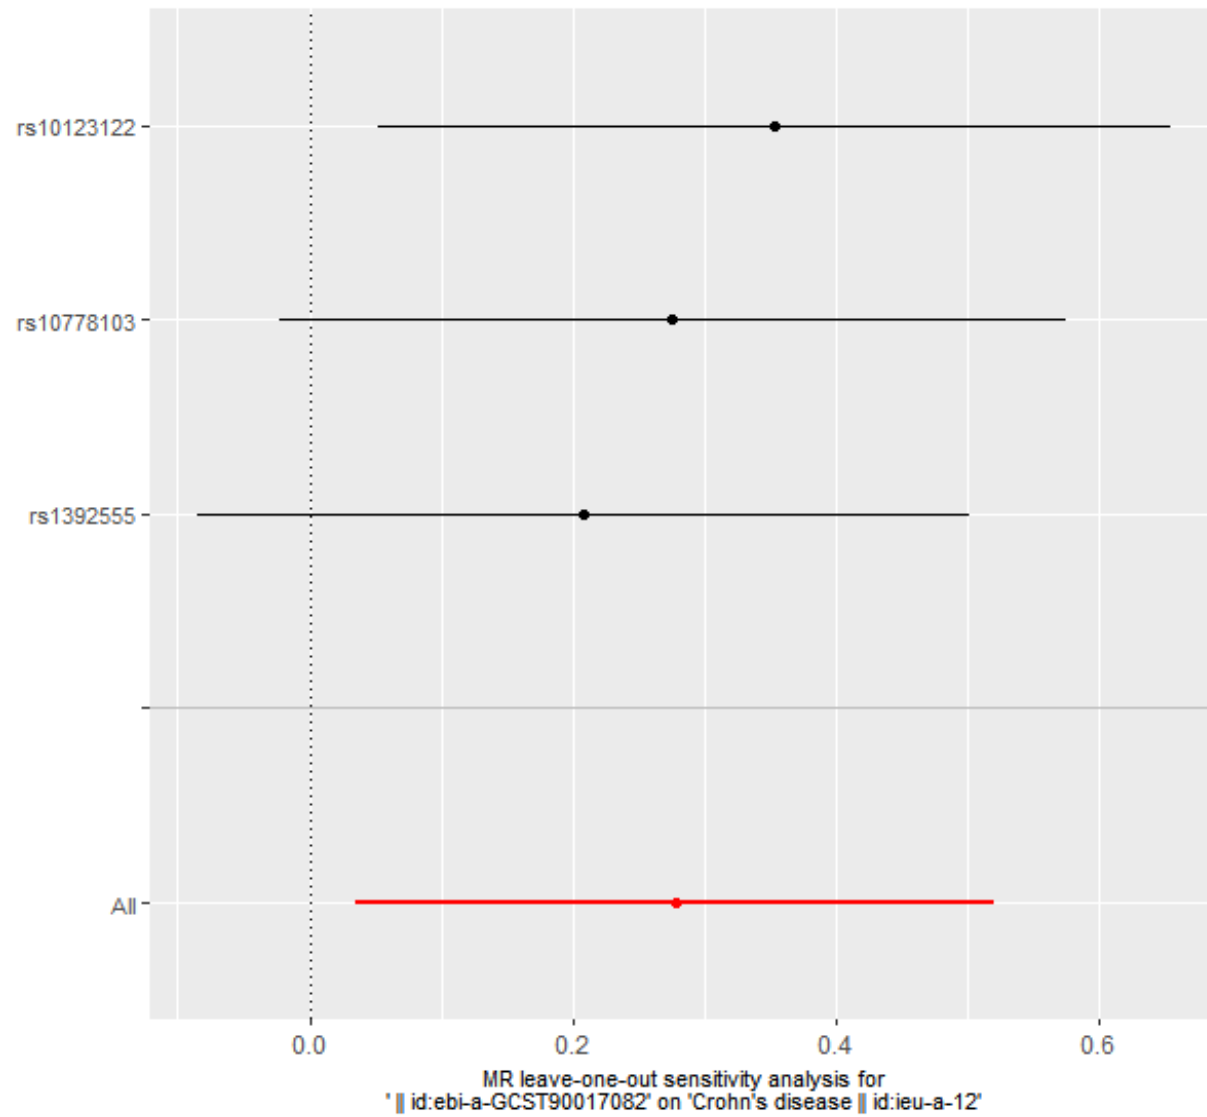

MR Method

- Inverse variance weighted
- MR Egger

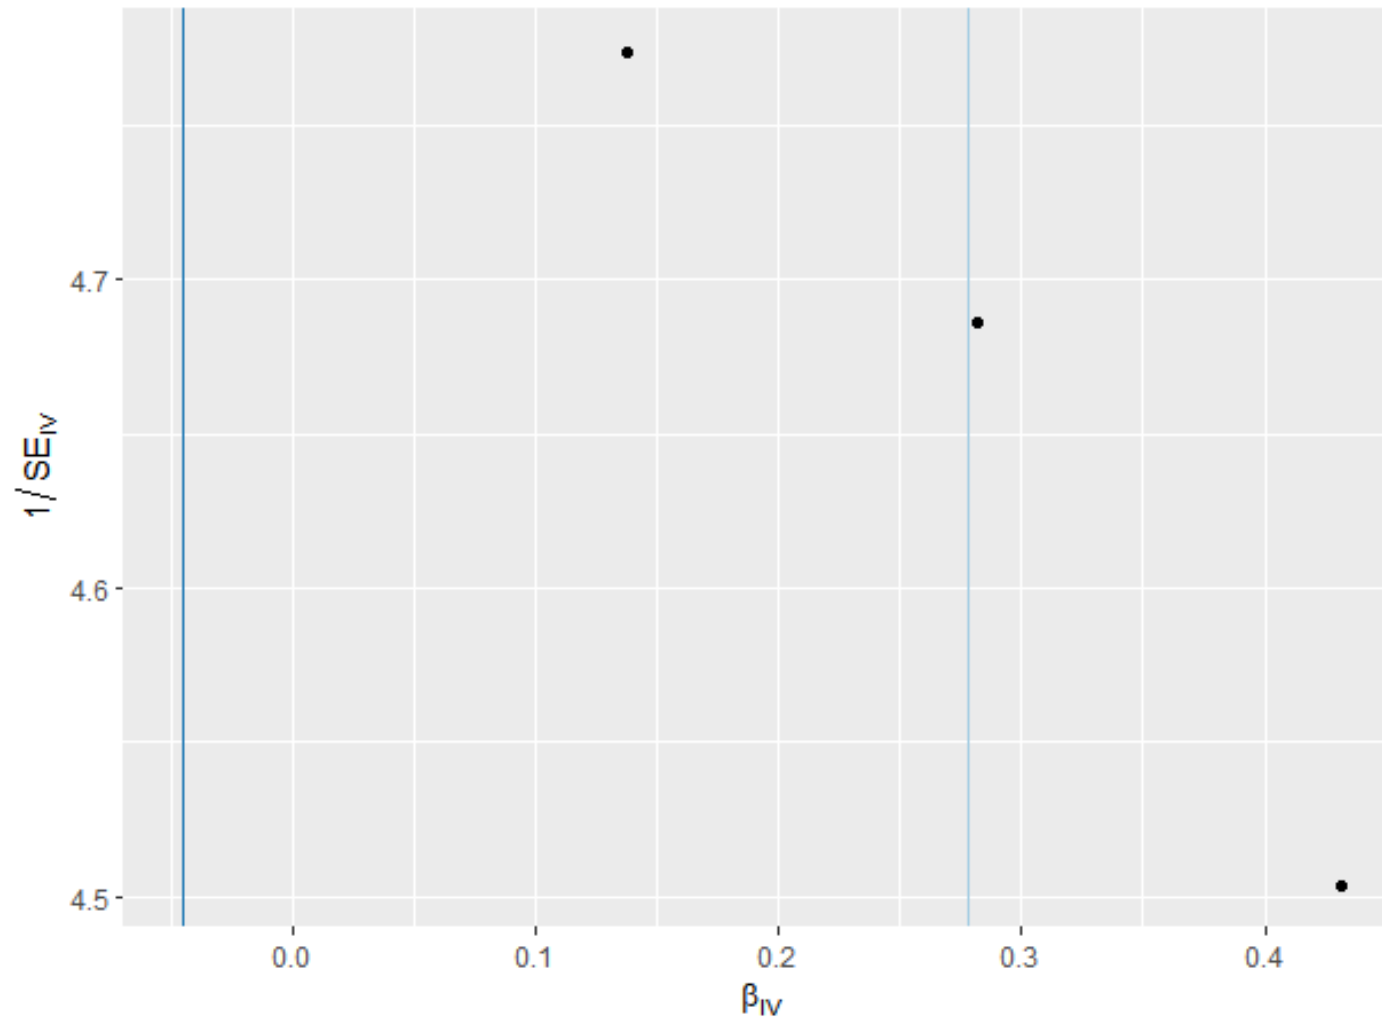

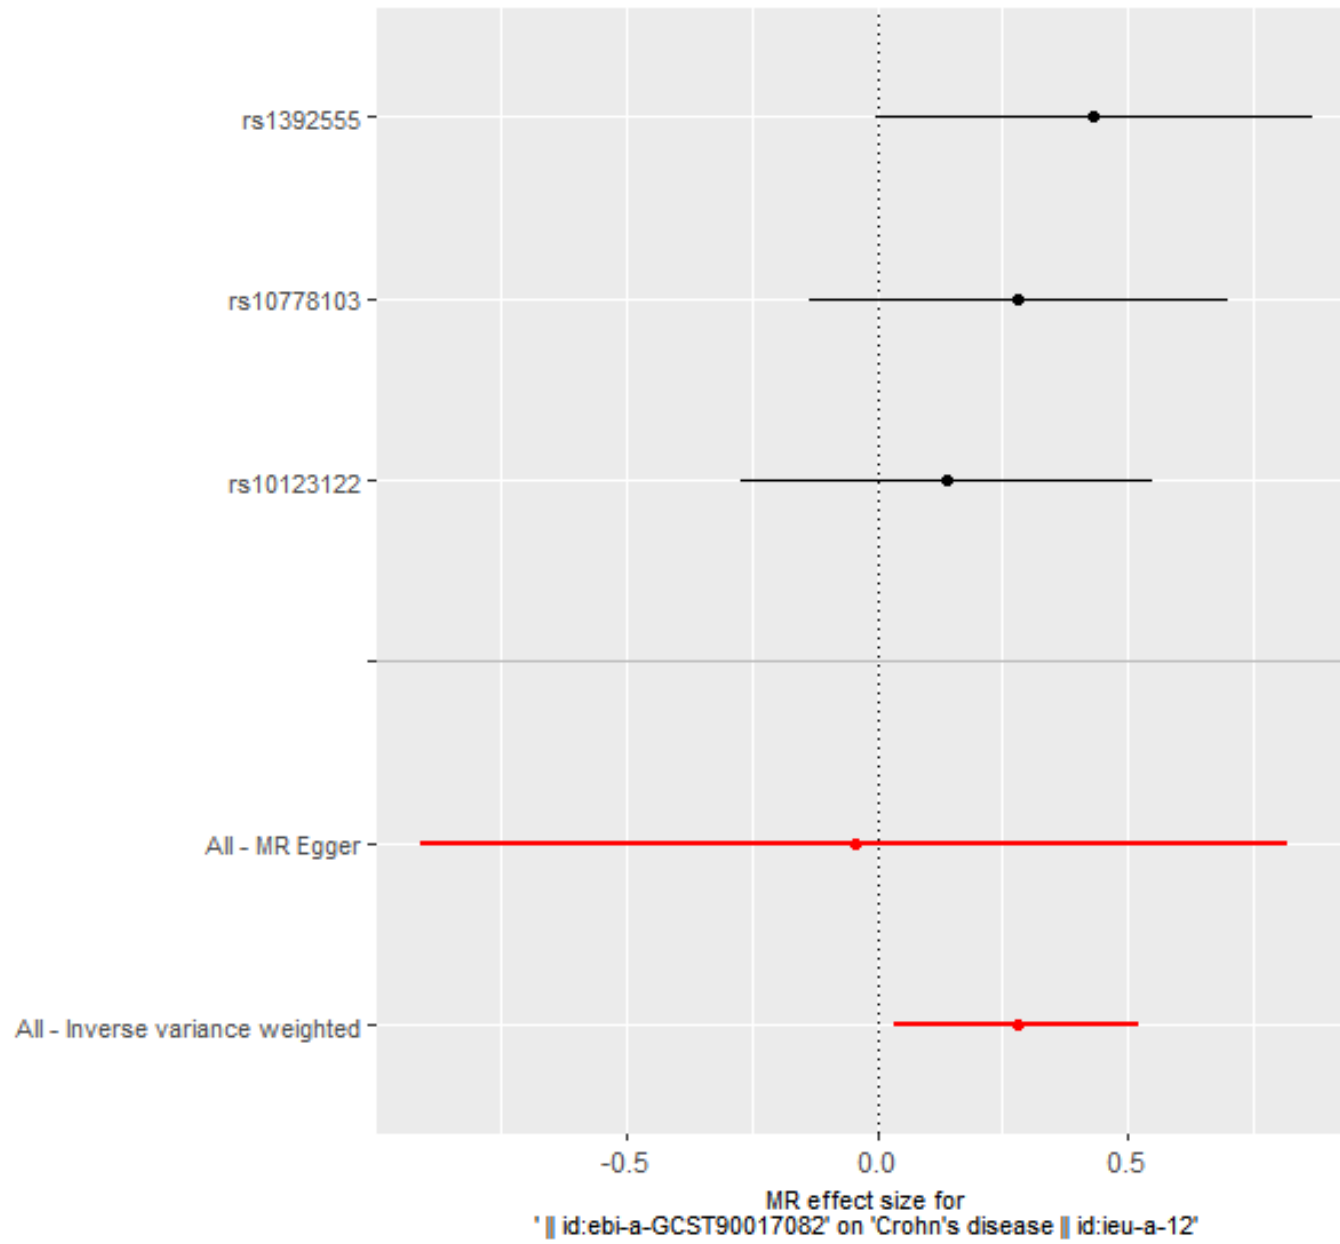

MR Test

- Inverse variance weighted
- MR Egger
- Simple mode
- Weighted median
- Weighted mode

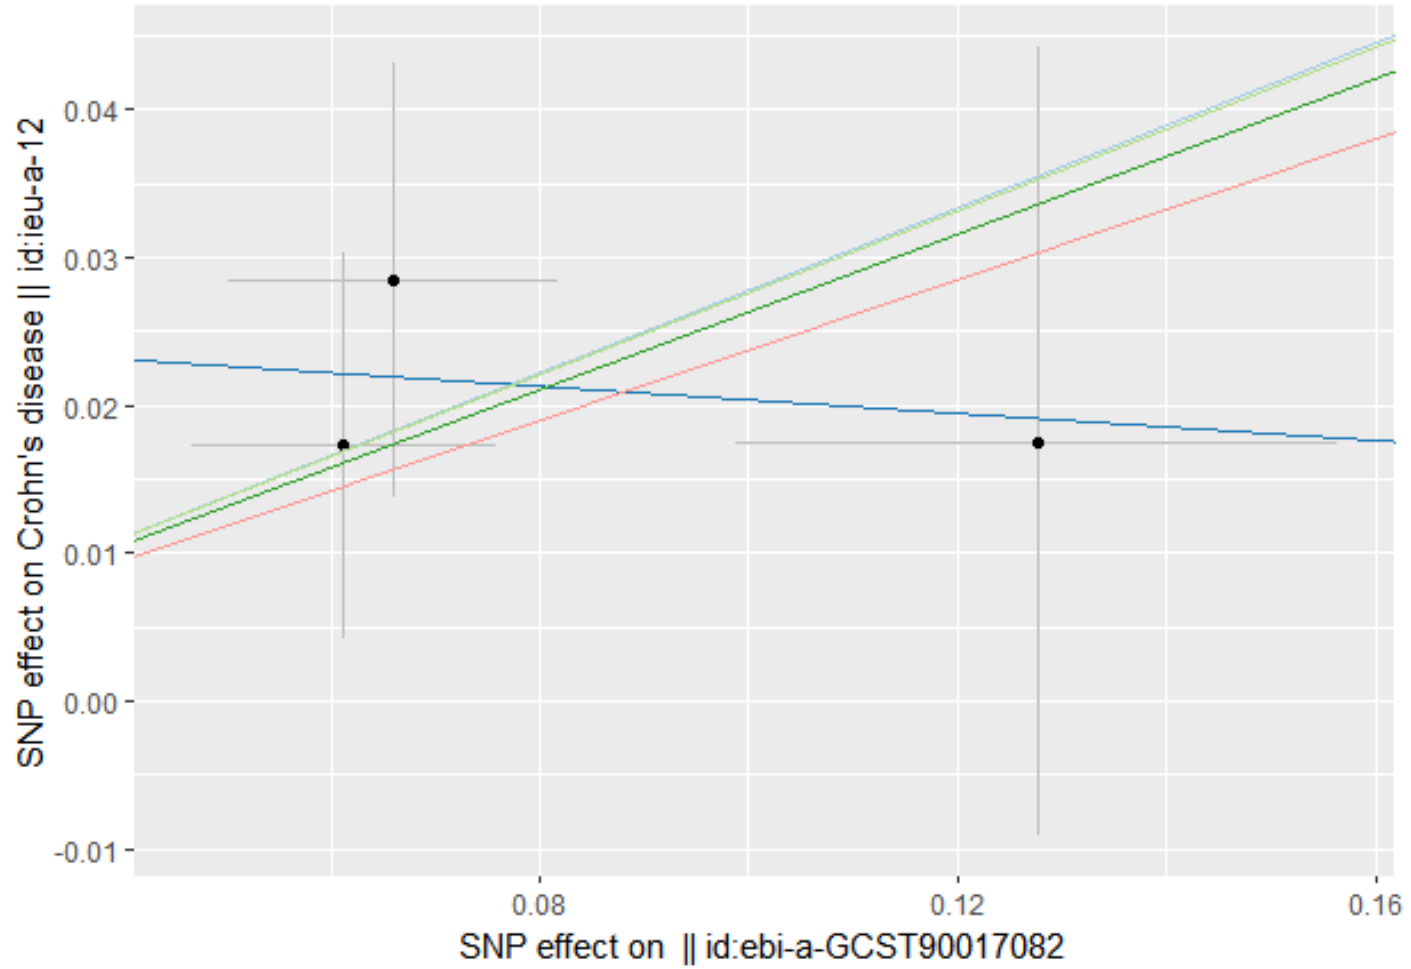

**Figure 124** Leave-one-out analysis, funnel plot, MR effect size and scatter plot for gut microbiota abundance (order NB1n id.3953) on crohn's disease

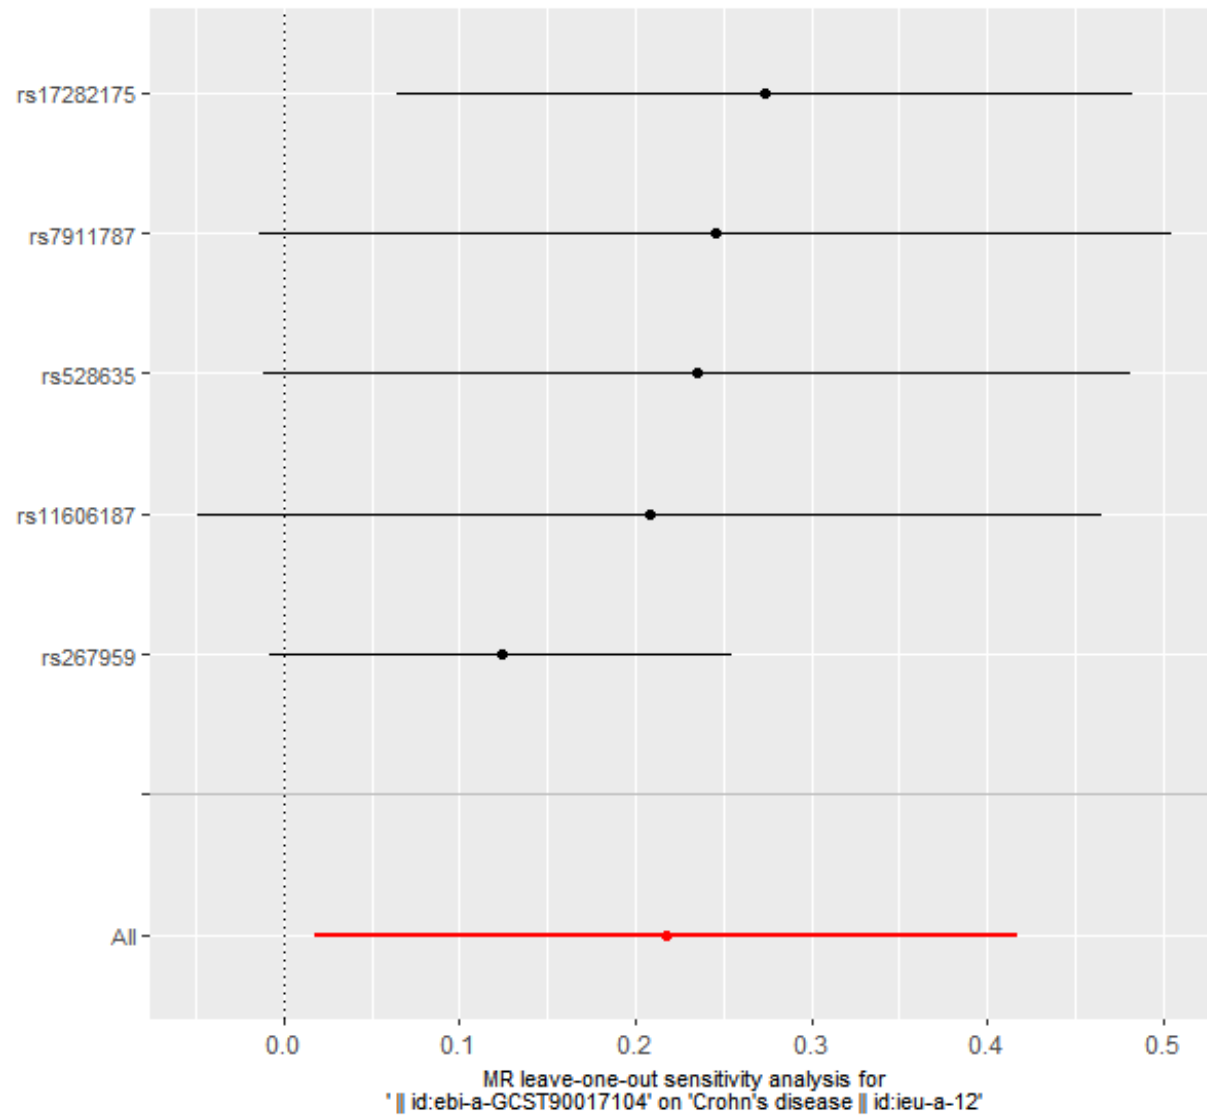

MR Method

- Inverse variance weighted
- MR Egger

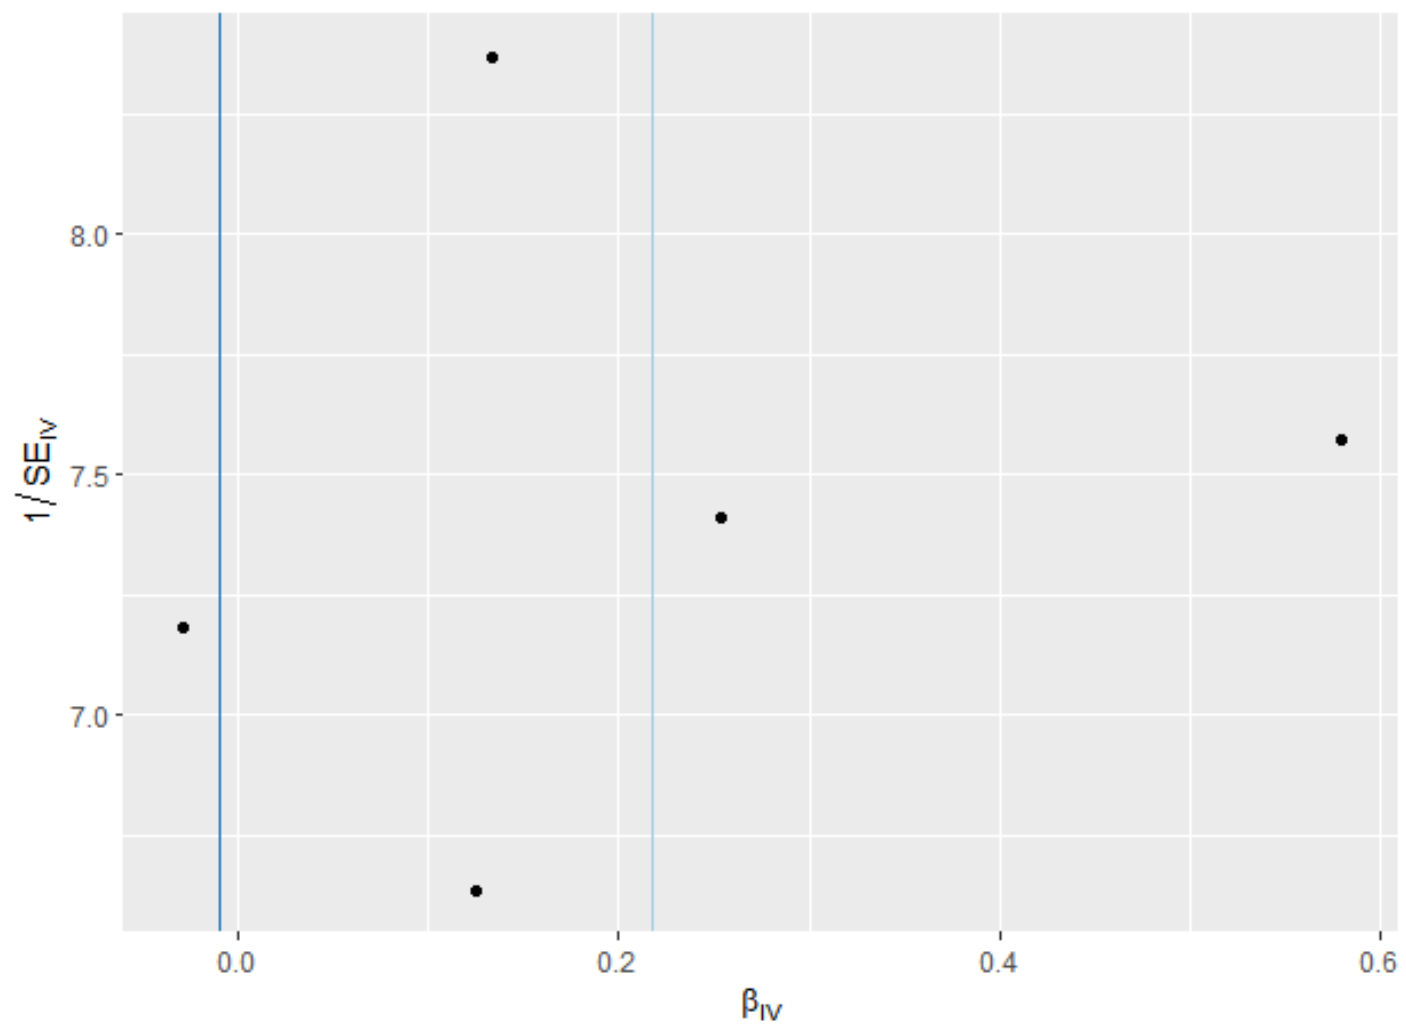

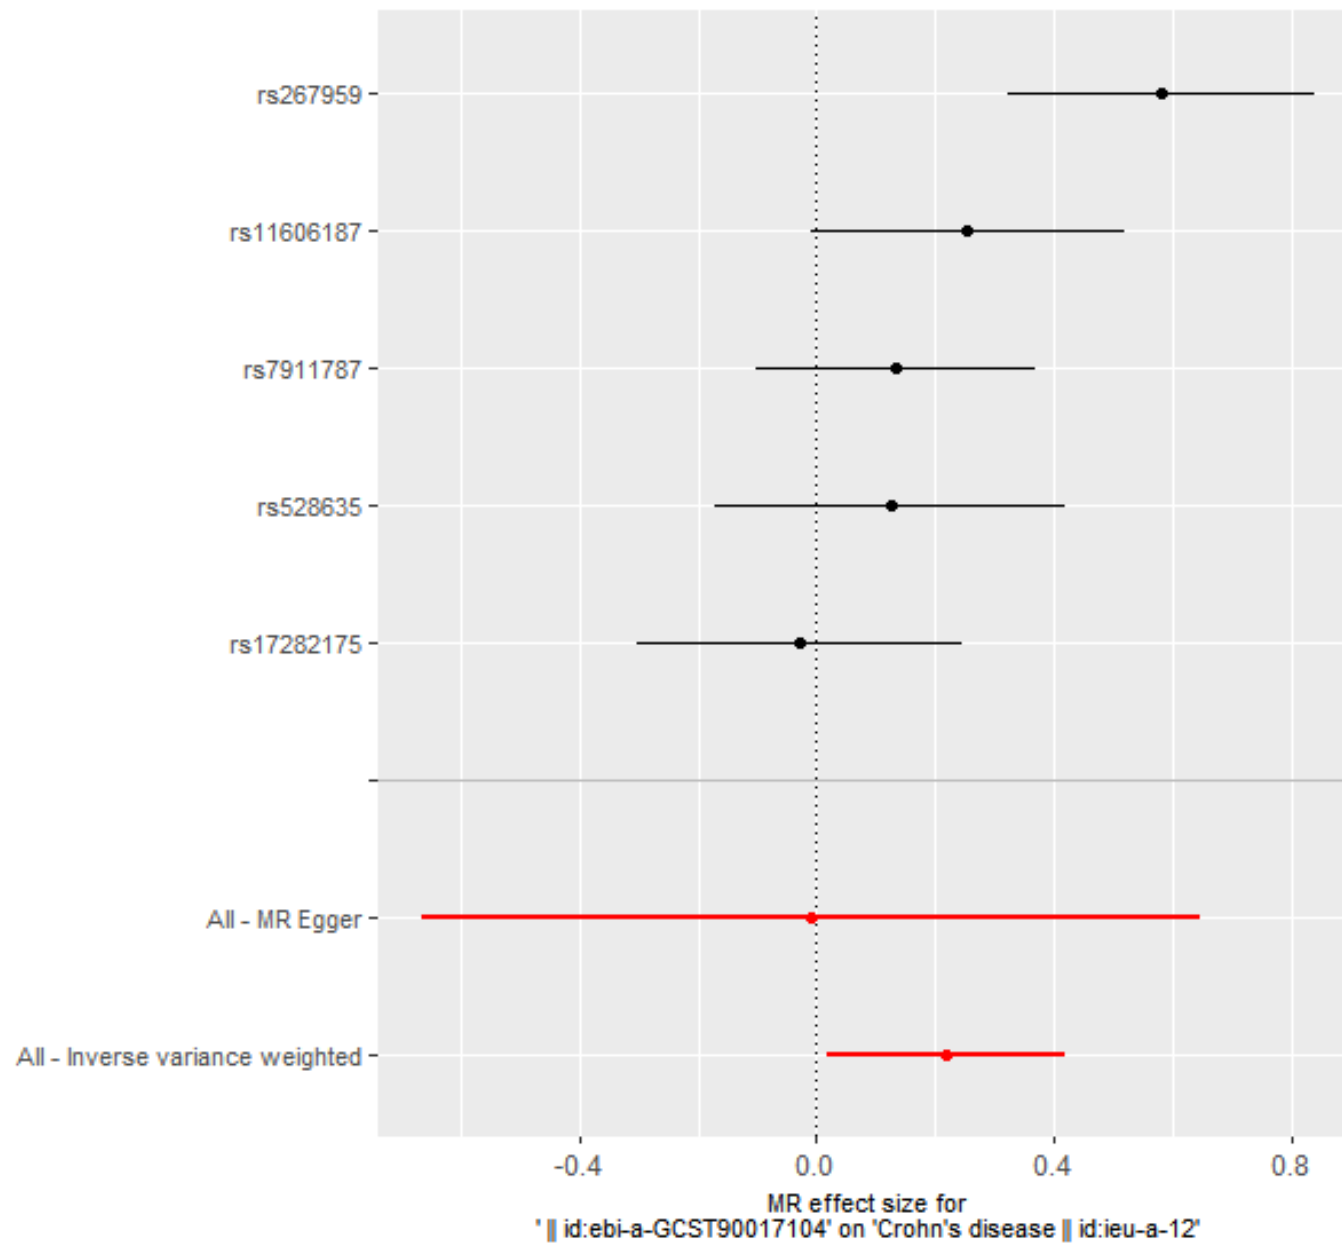

### MR Test

- Inverse variance weighted
- MR Egger
- Simple mode
- Weighted median
- Weighted mode

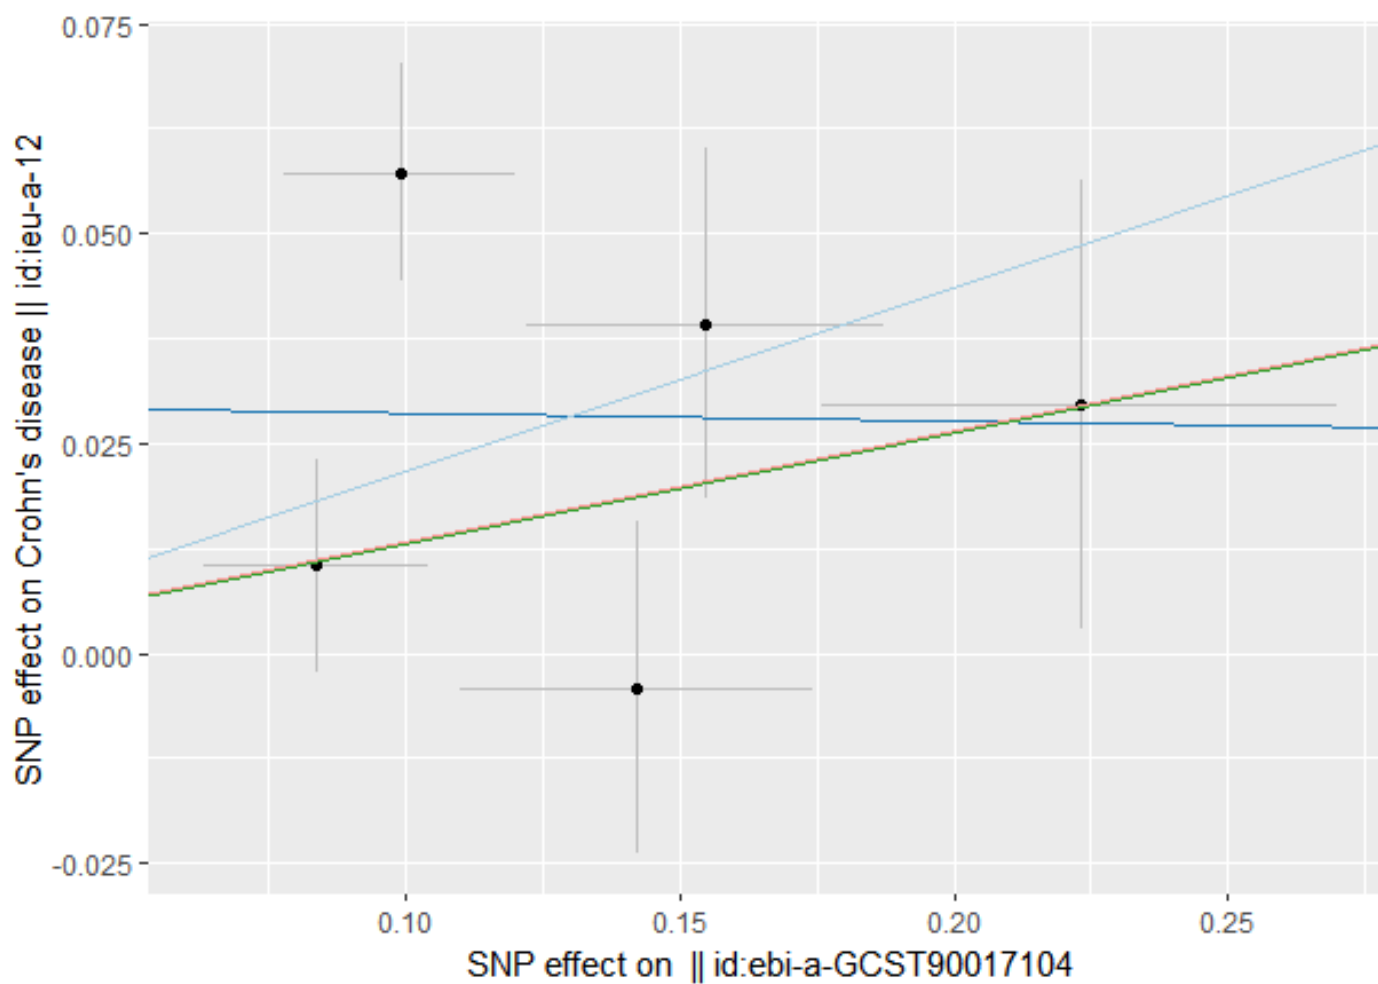



**Figure 125** Leave-one-out analysis, funnel plot, MR effect size and scatter plot for gut microbiota abundance (order Verrucomicrobiales id.4030) on crohn's disease

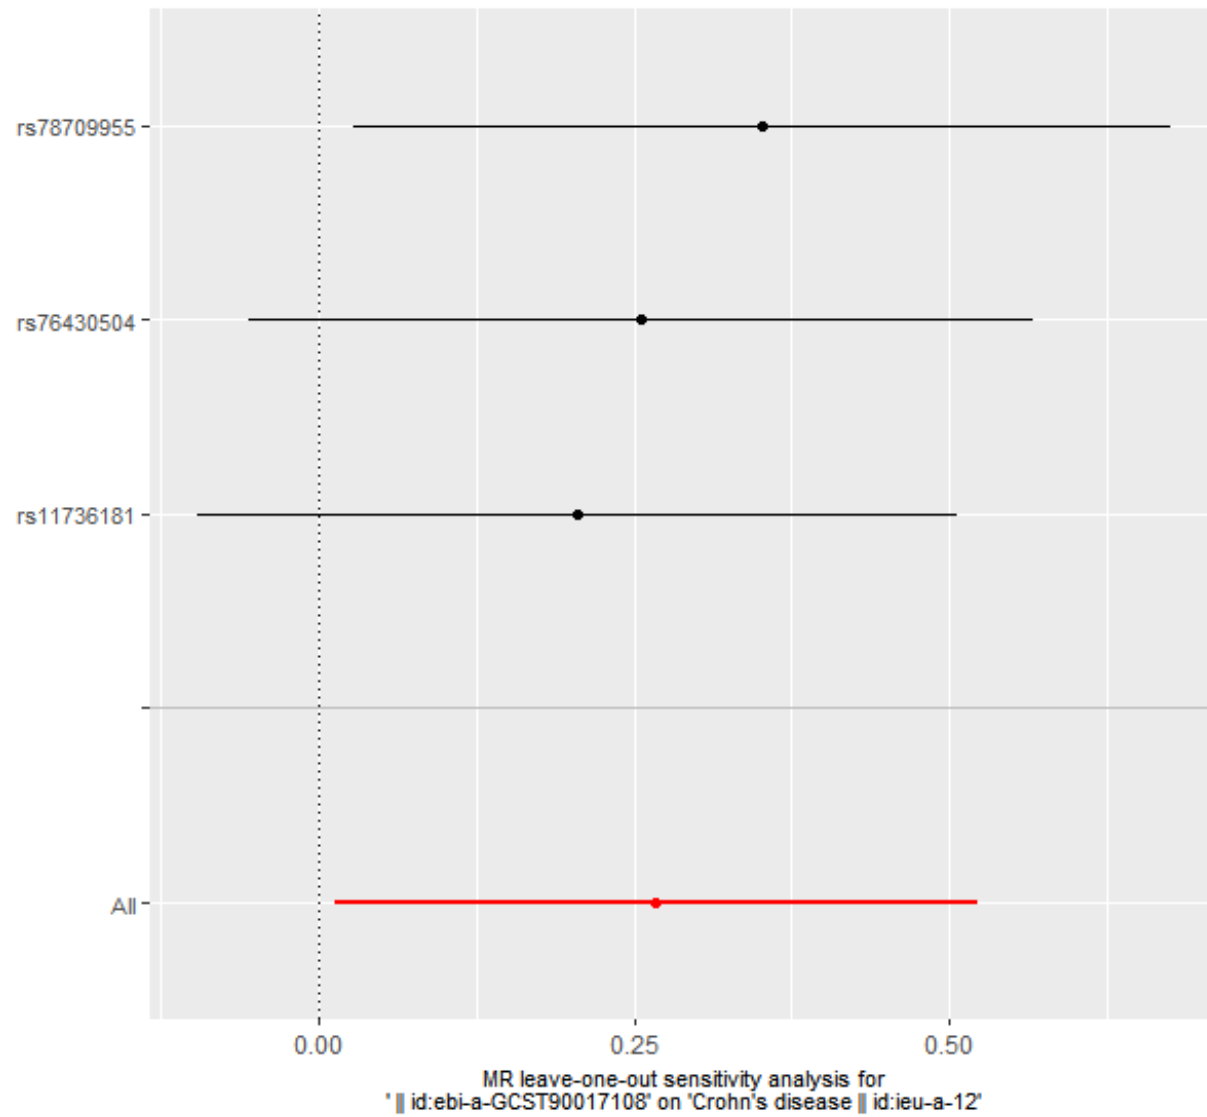

MR Method

- Inverse variance weighted
- MR Egger

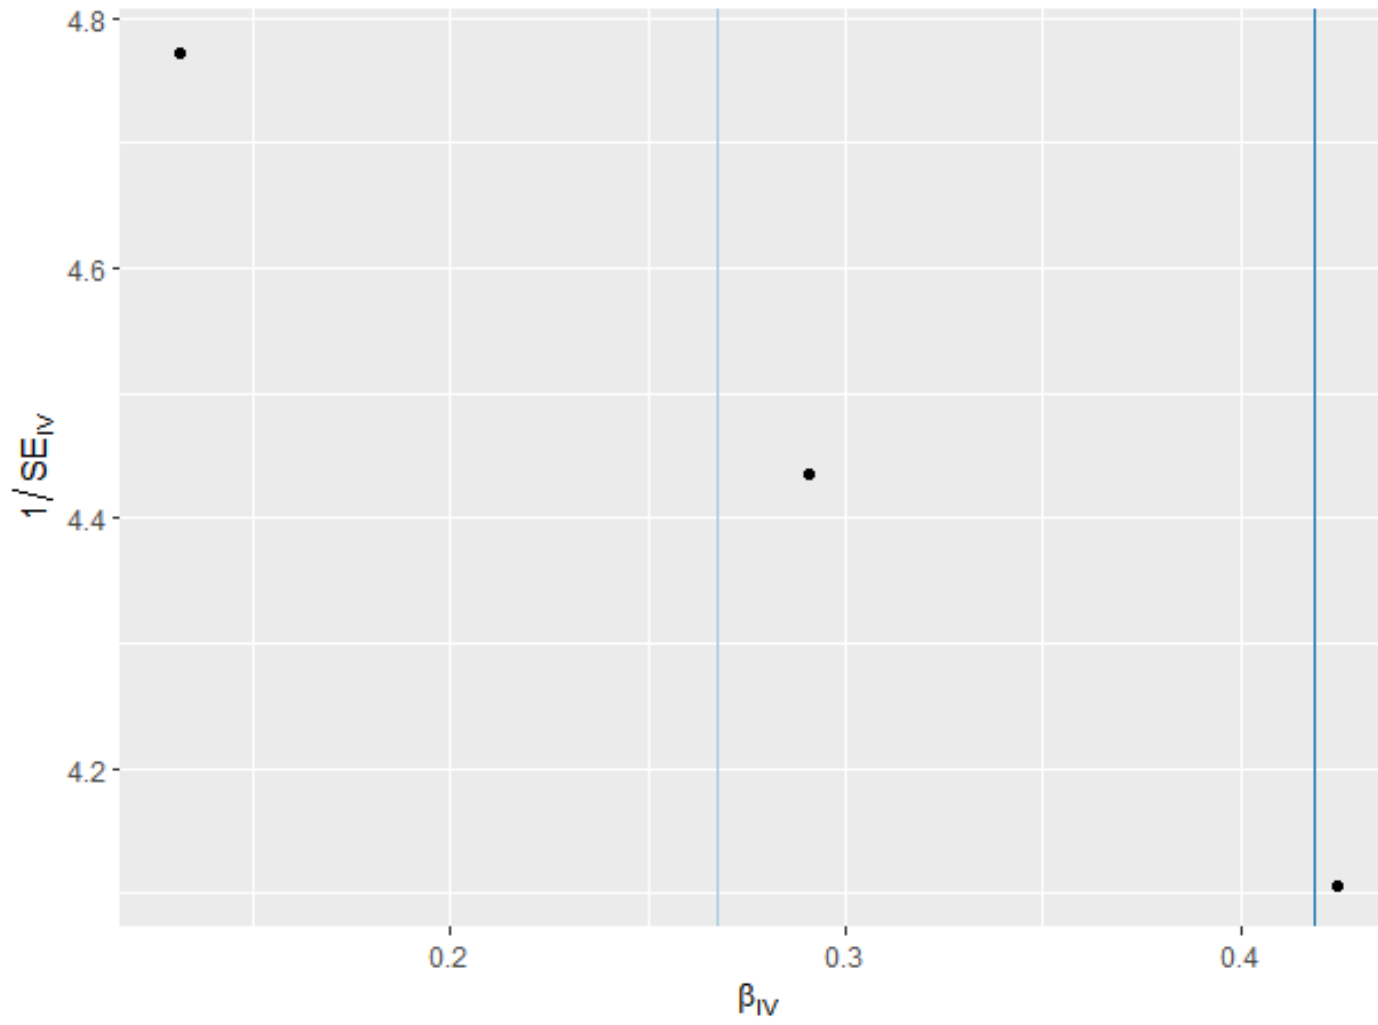

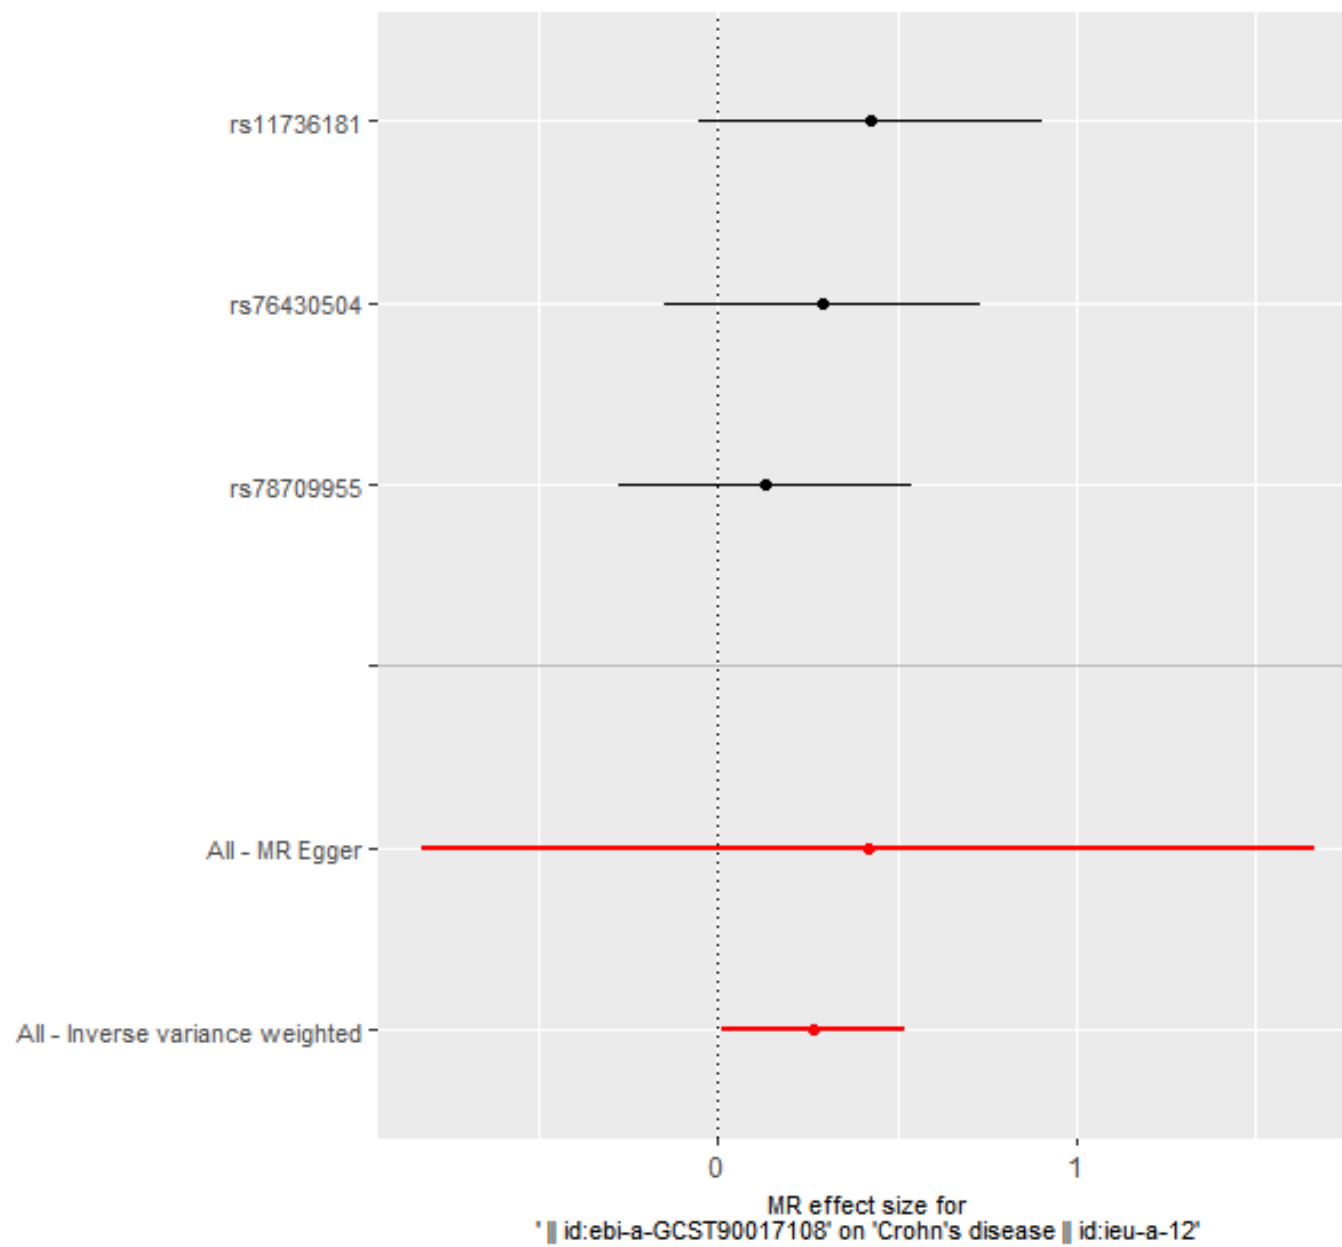

MR Test

- Inverse variance weighted
- MR Egger
- Simple mode
- Weighted median
- Weighted mode

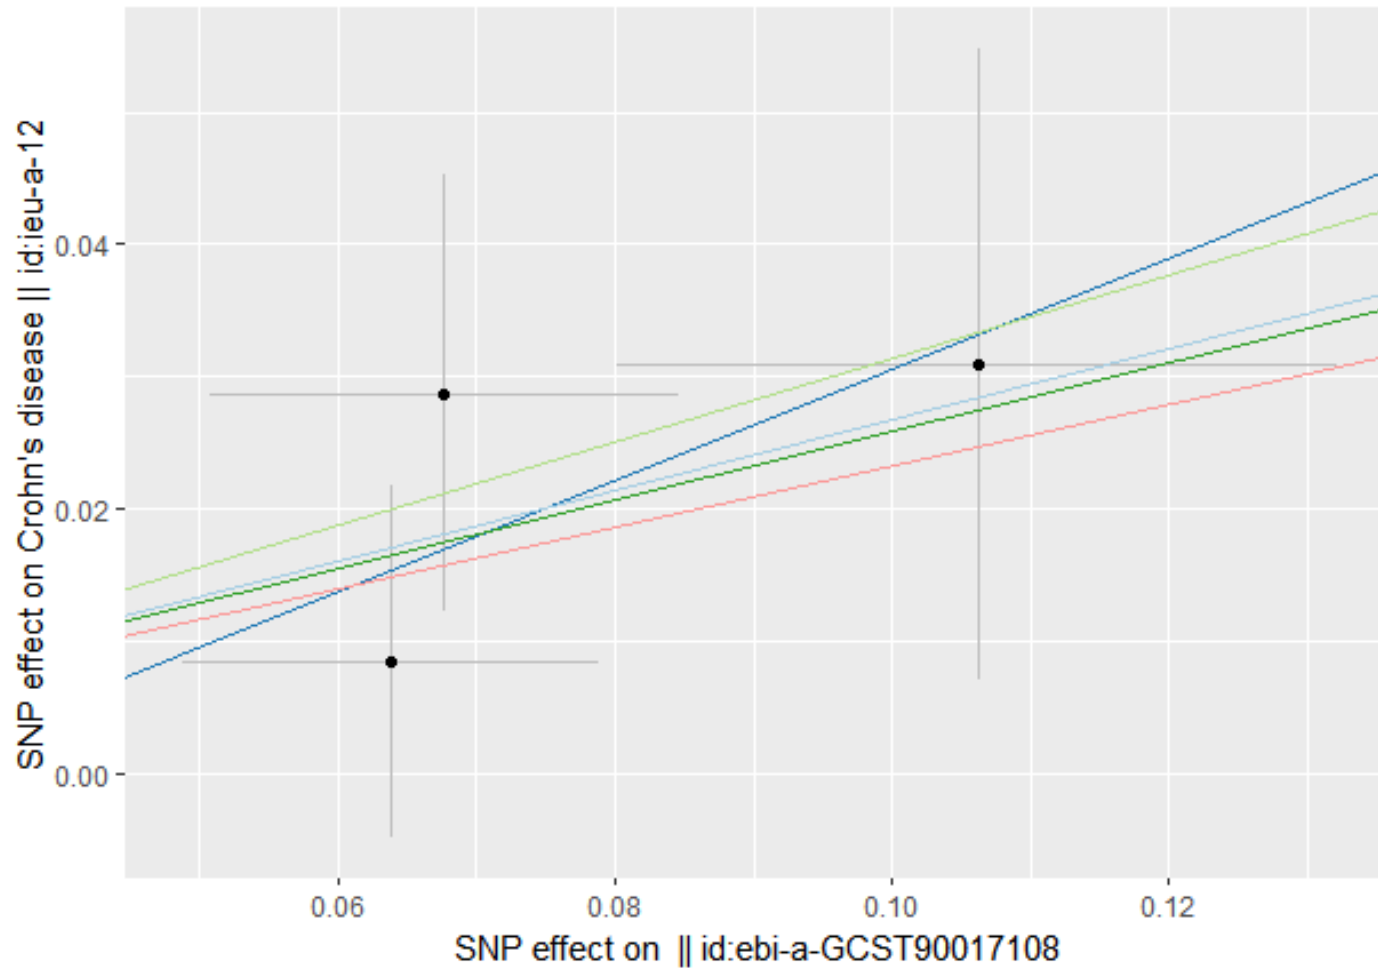

**Figure 126** Leave-one-out analysis, funnel plot, MR effect size and scatter plot for gut microbiota abundance (phylum Verrucomicrobia id.3982) on crohn's disease

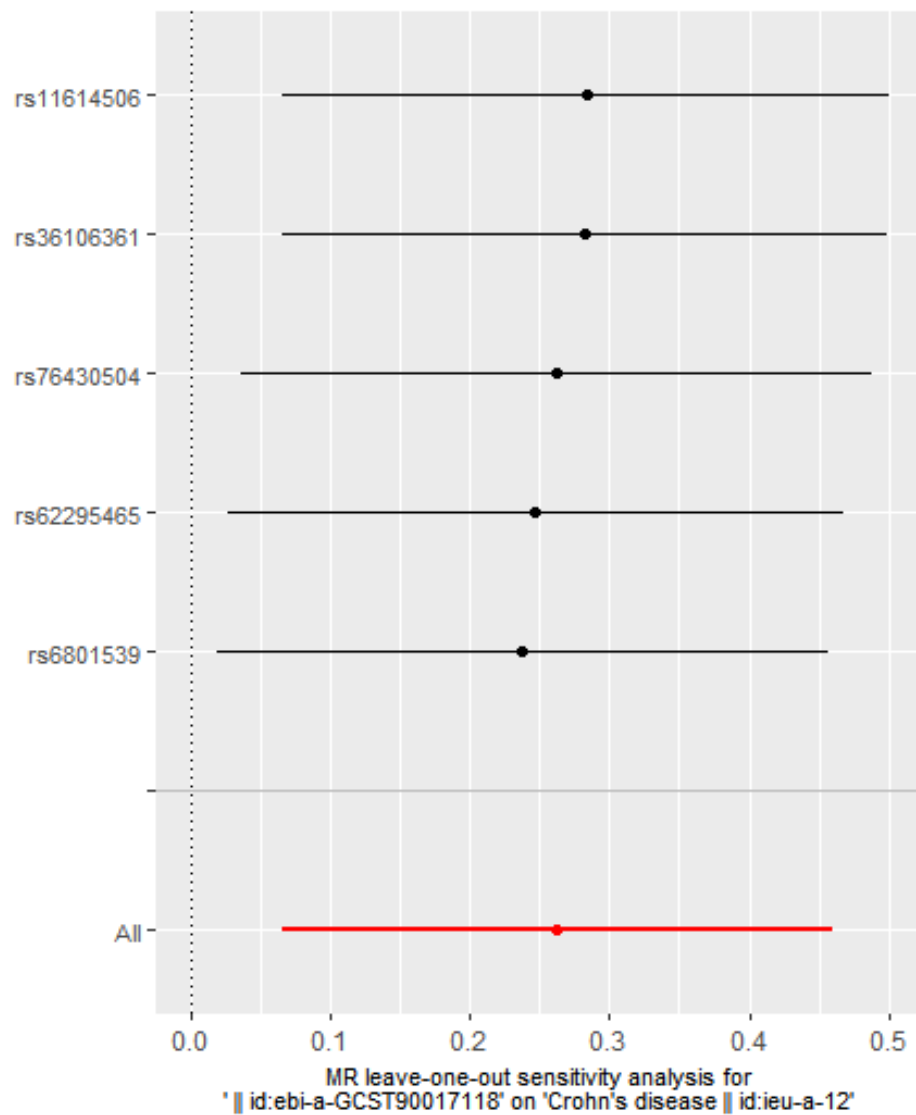

MR Method

- Inverse variance weighted
- MR Egger

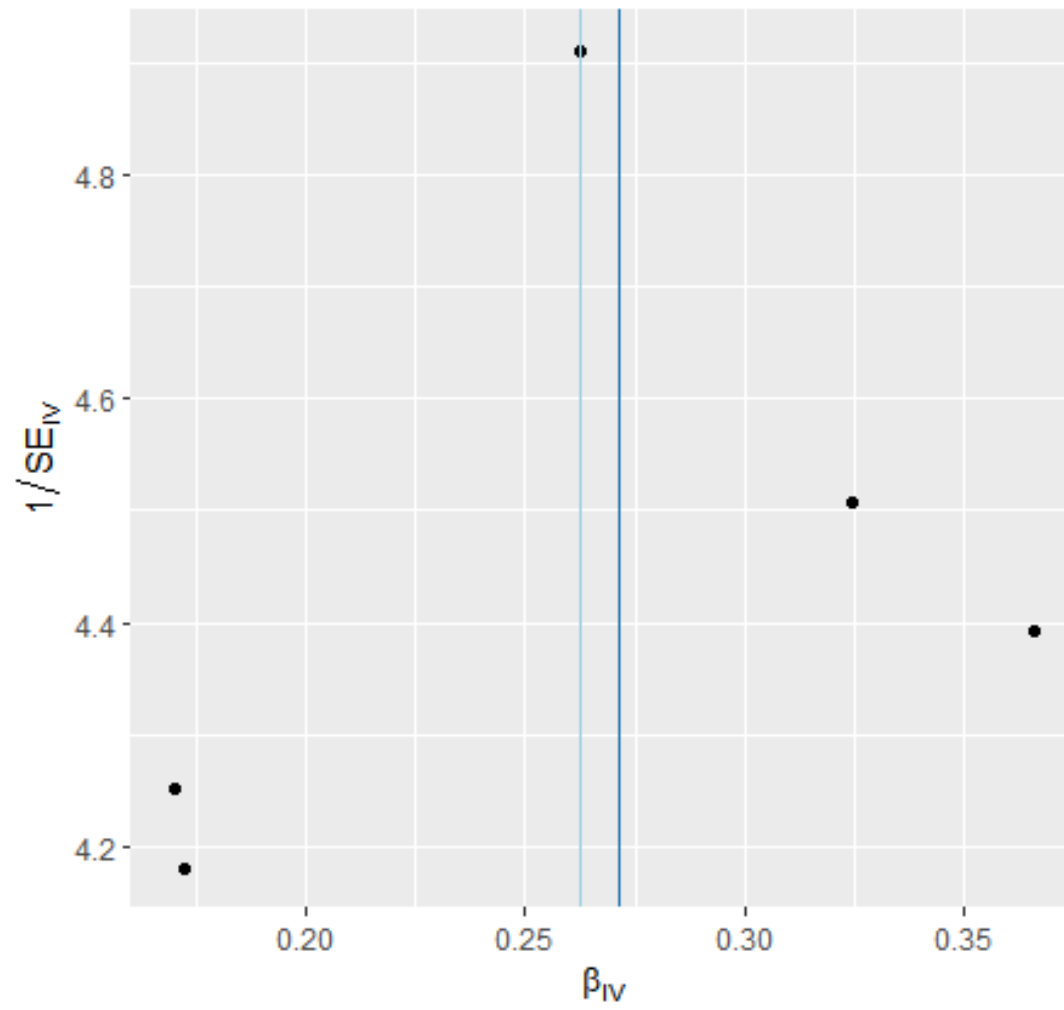

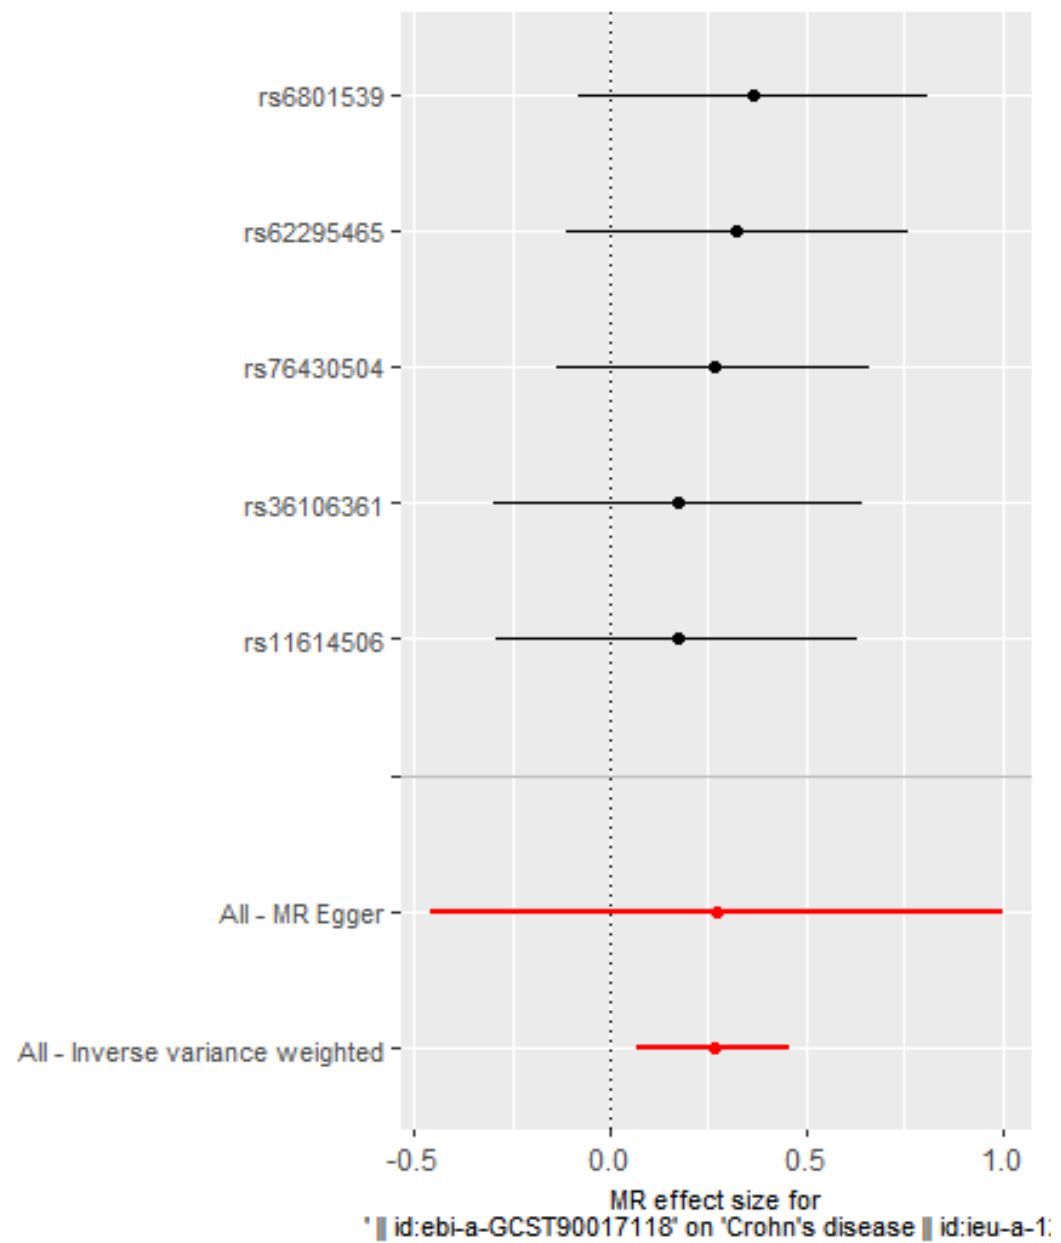

MR Test

- Inverse variance weighted
- MR Egger
- Simple mode
- Weighted median
- Weighted mode

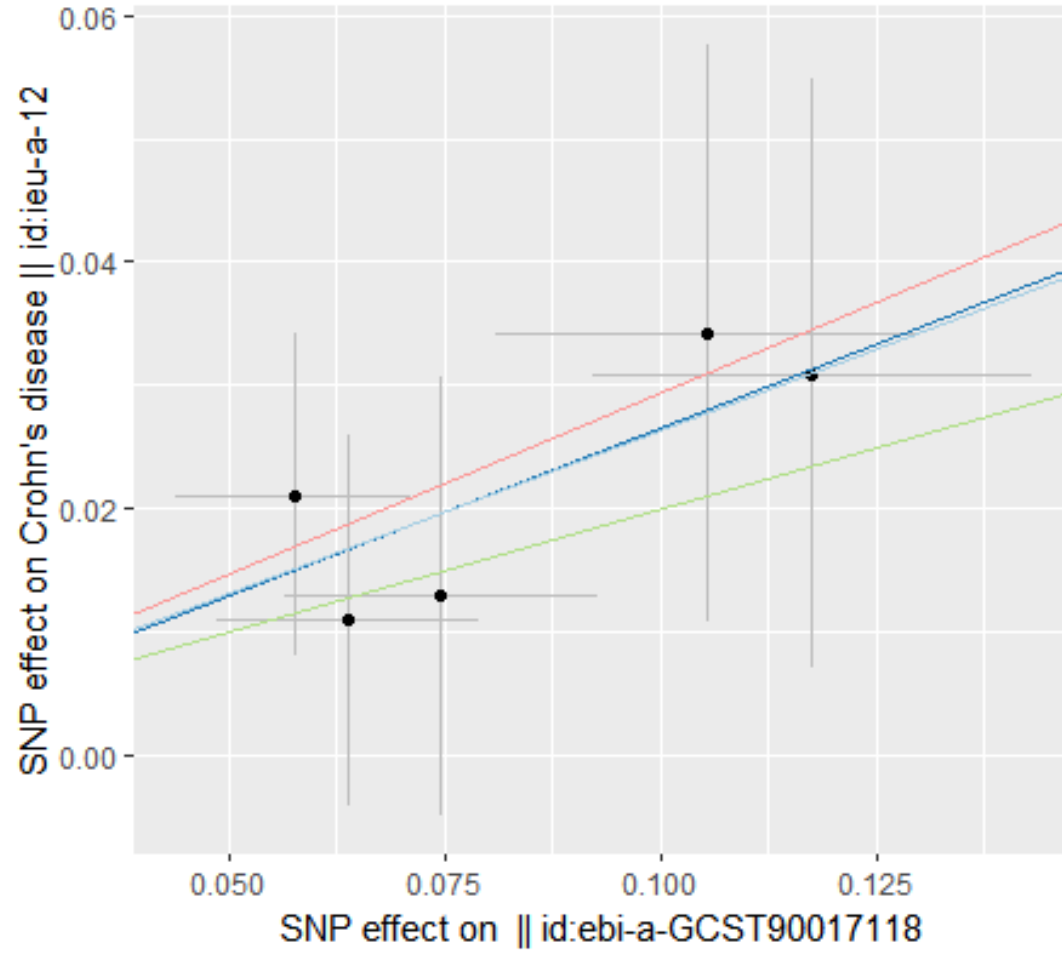



**Figure 127** Leave-one-out analysis, funnel plot, MR effect size and scatter plot for gut microbiota abundance (class Bacilli id.1673) on ulcerative colitis

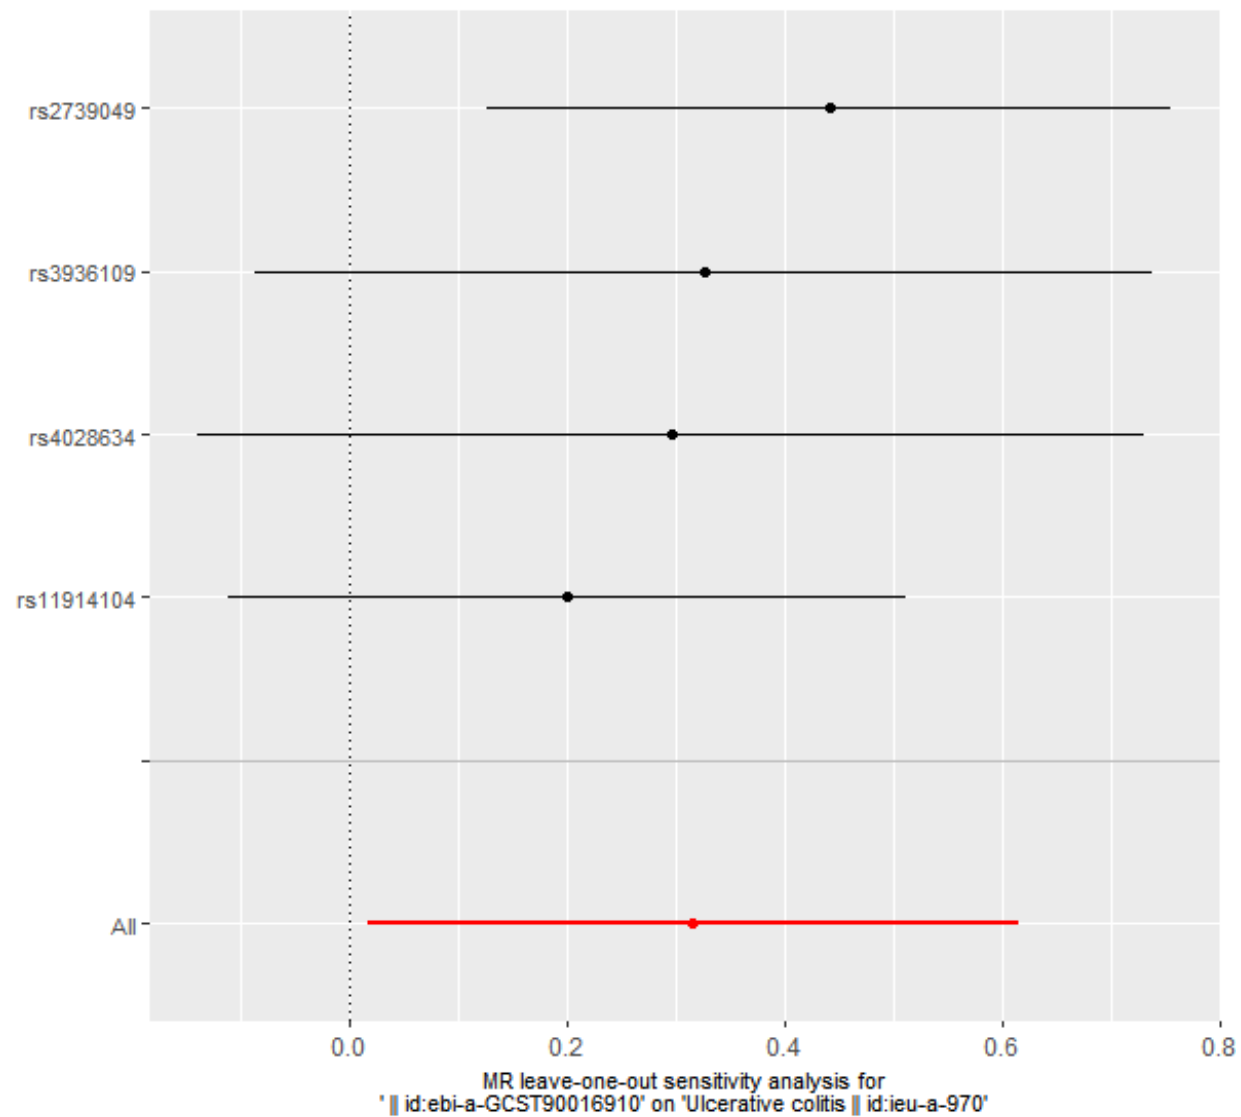

MR Method

- Inverse variance weighted
- MR Egger

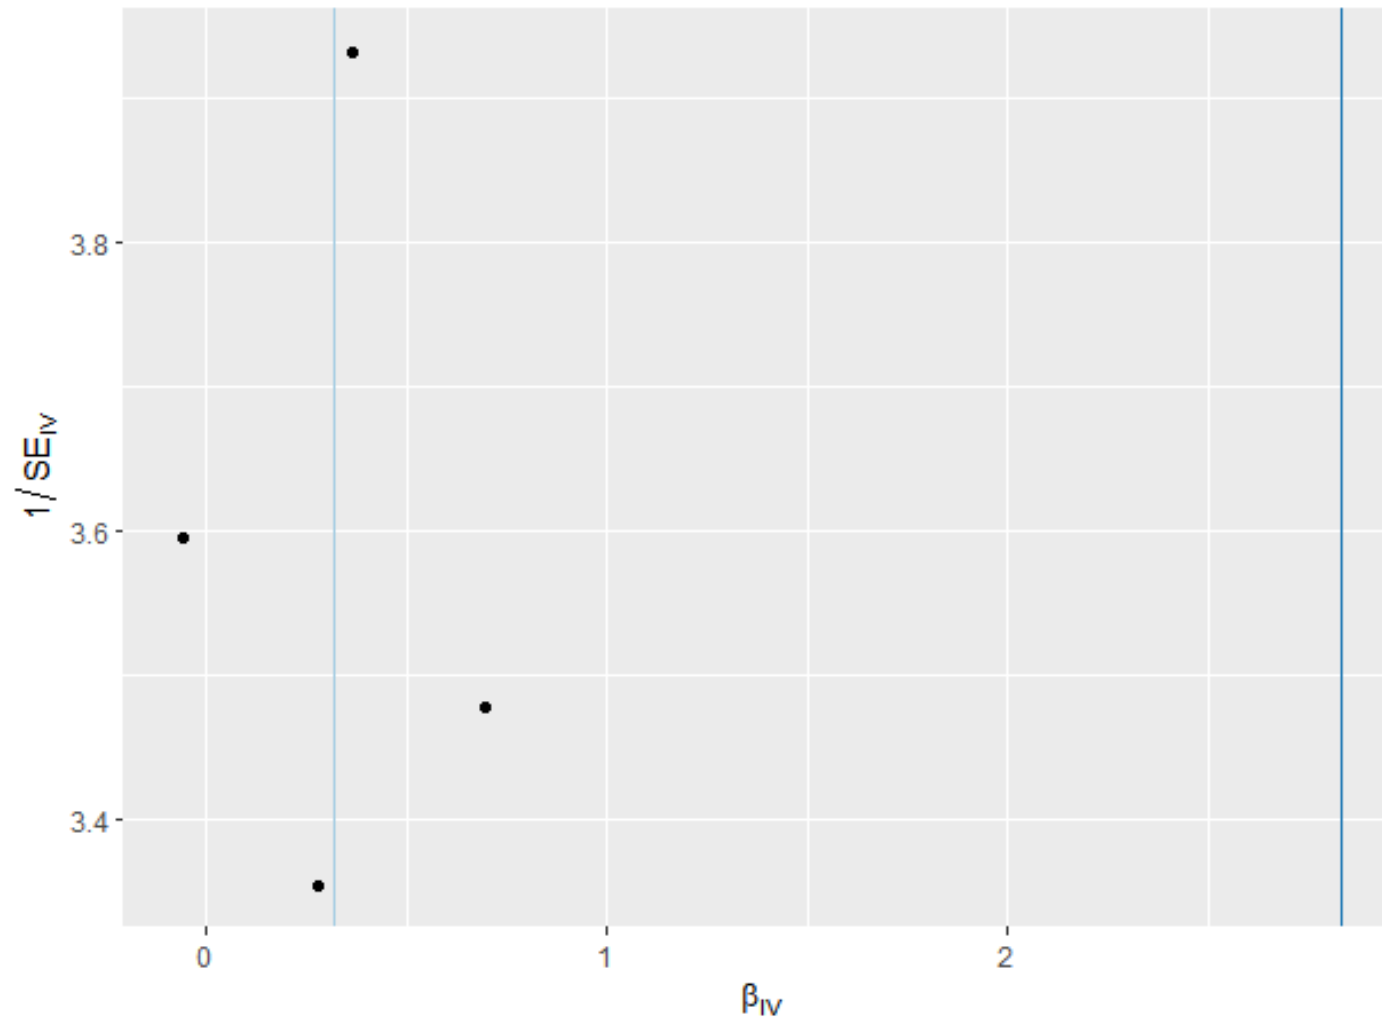

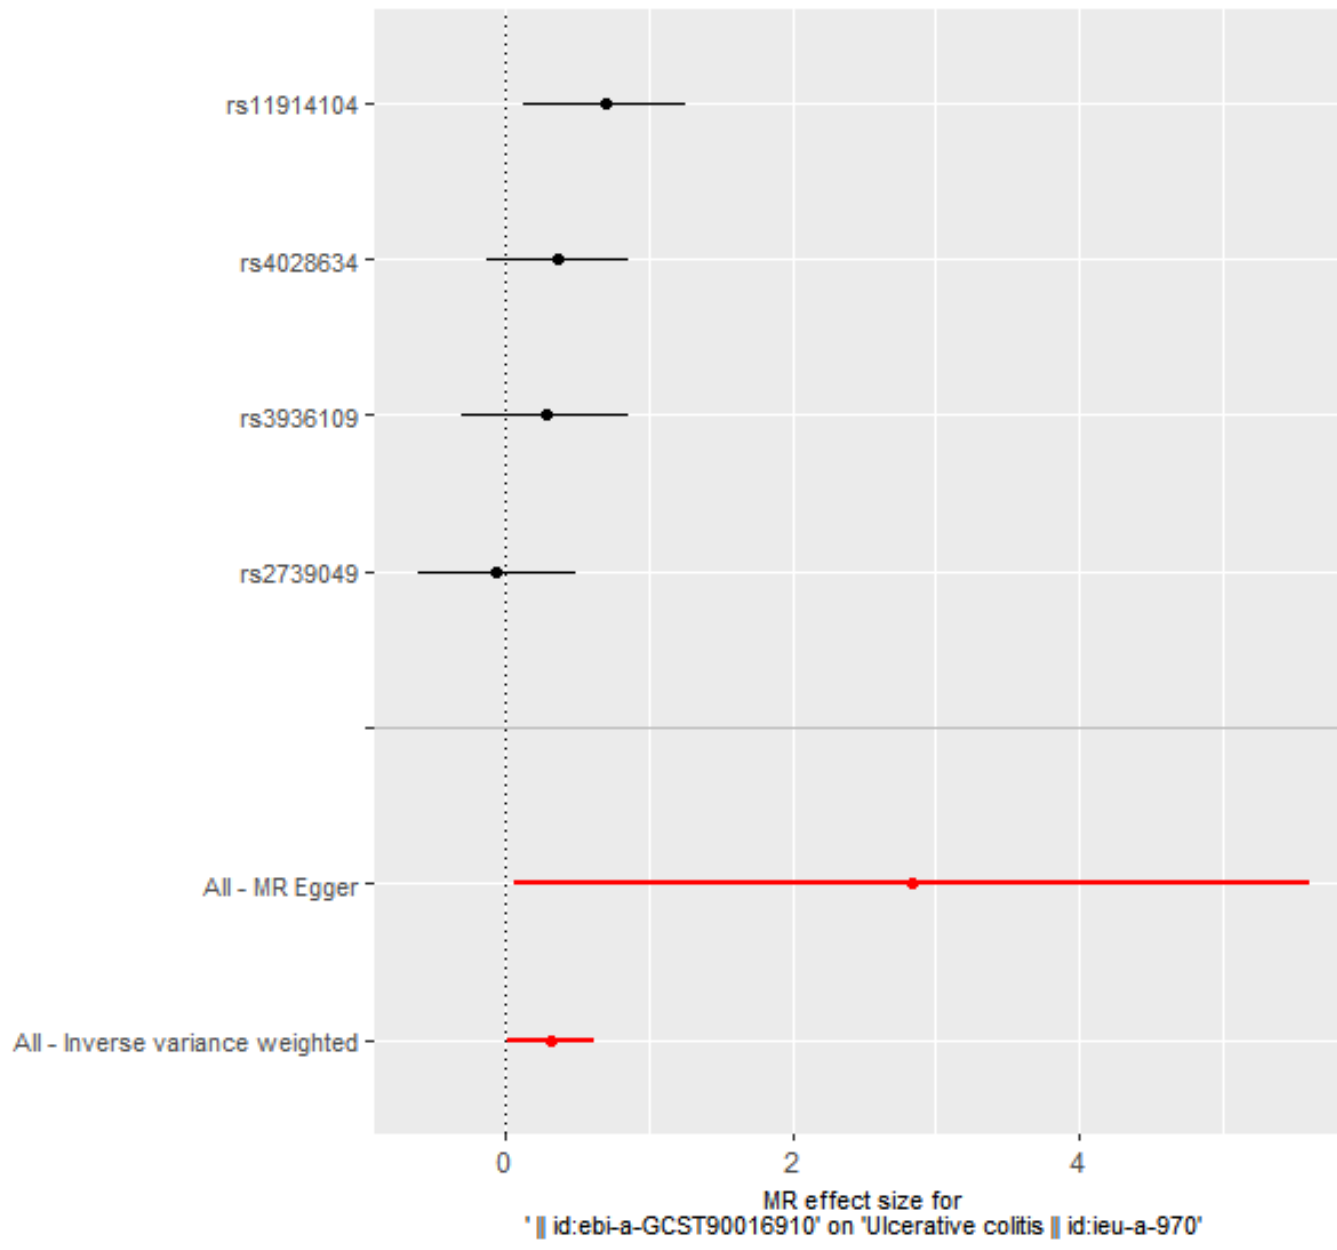

MR Test

- Inverse variance weighted
- MR Egger
- Simple mode
- Weighted median
- Weighted mode

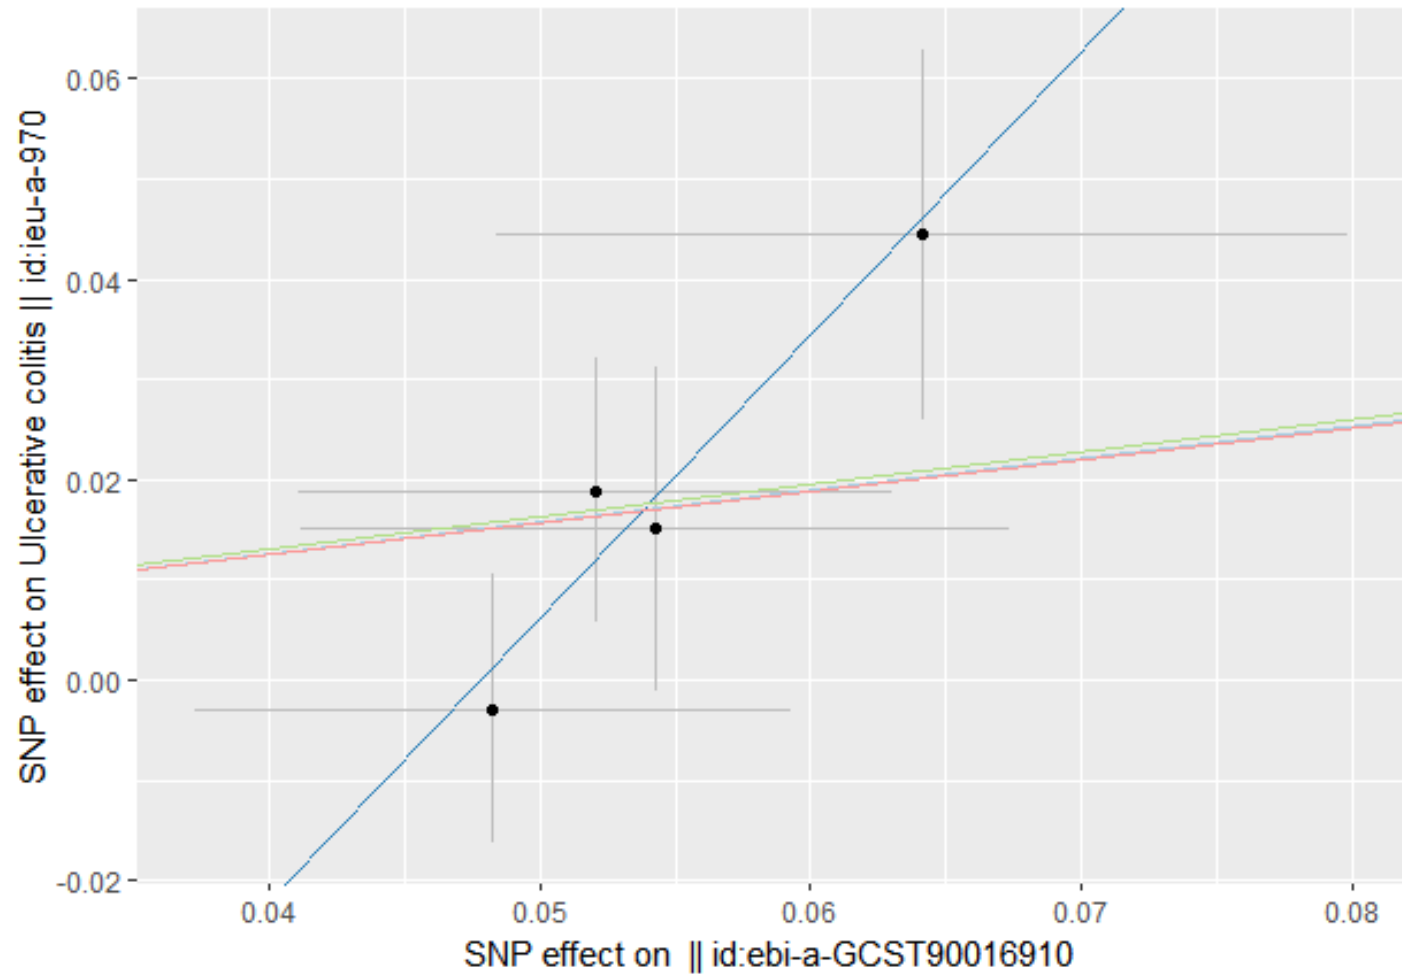

**Figure 128** Leave-one-out analysis, funnel plot, MR effect size and scatter plot for gut microbiota abundance (genus *Eubacterium oxidoreducens* group id.11339) on ulcerative colitis

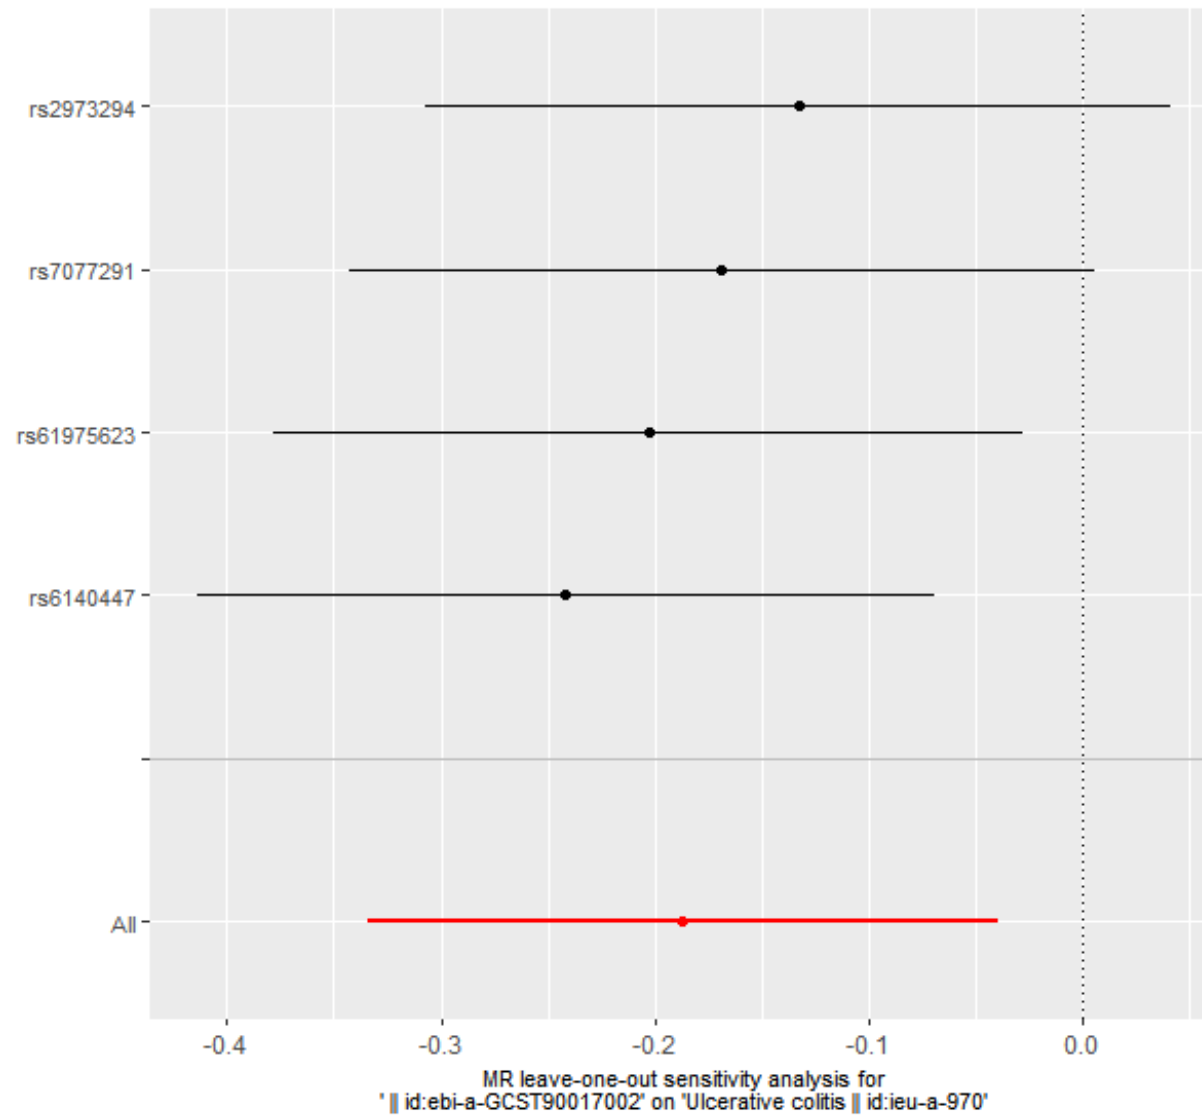

MR Method

- Inverse variance weighted
- MR Egger

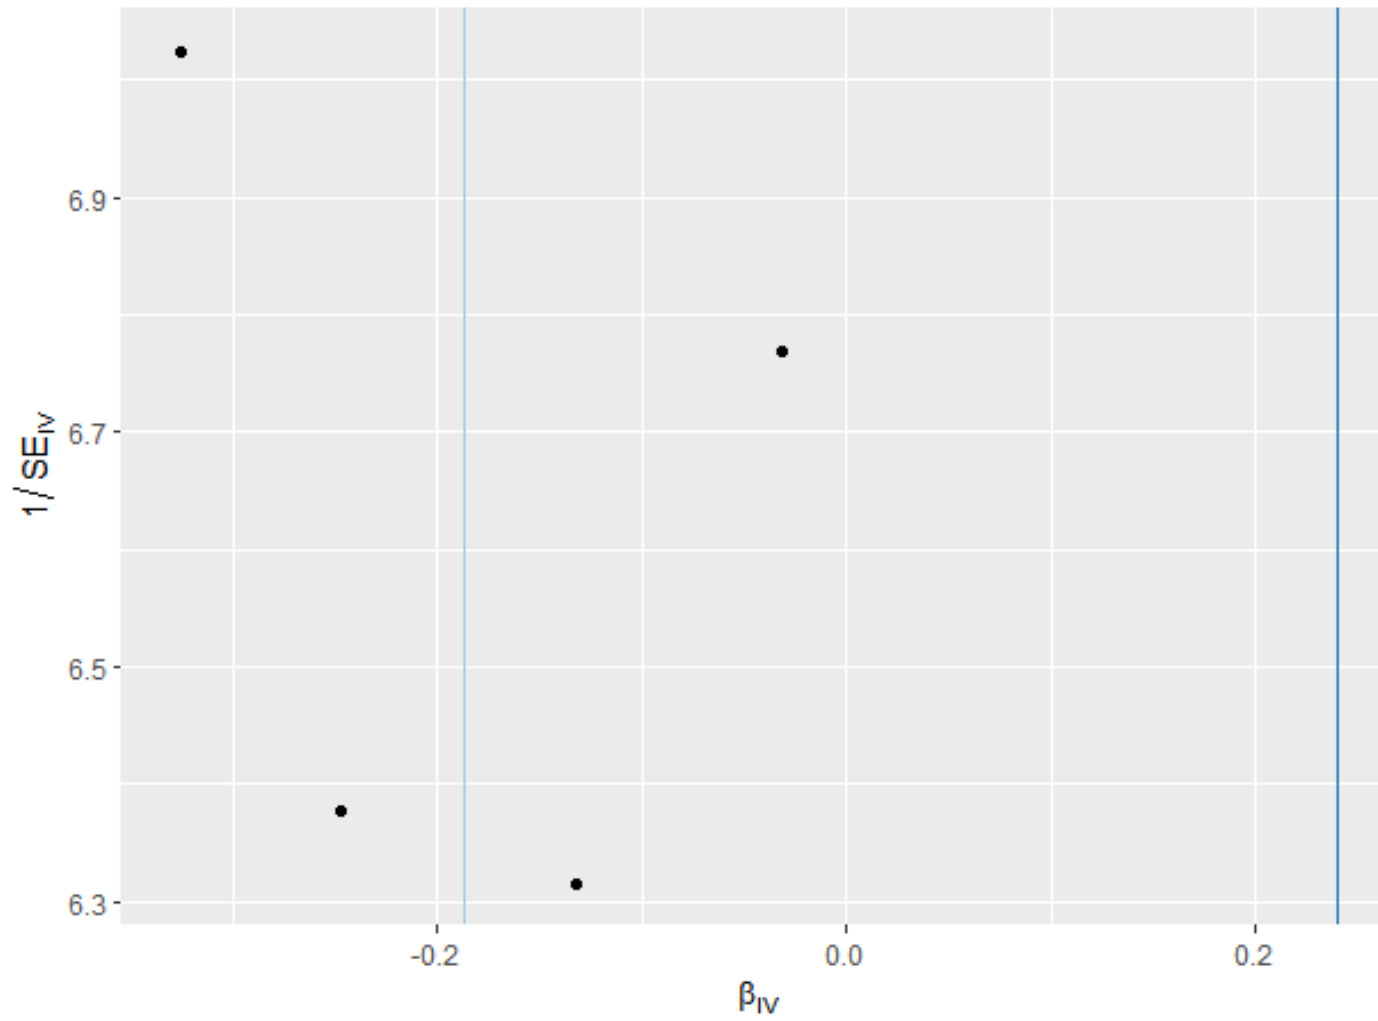

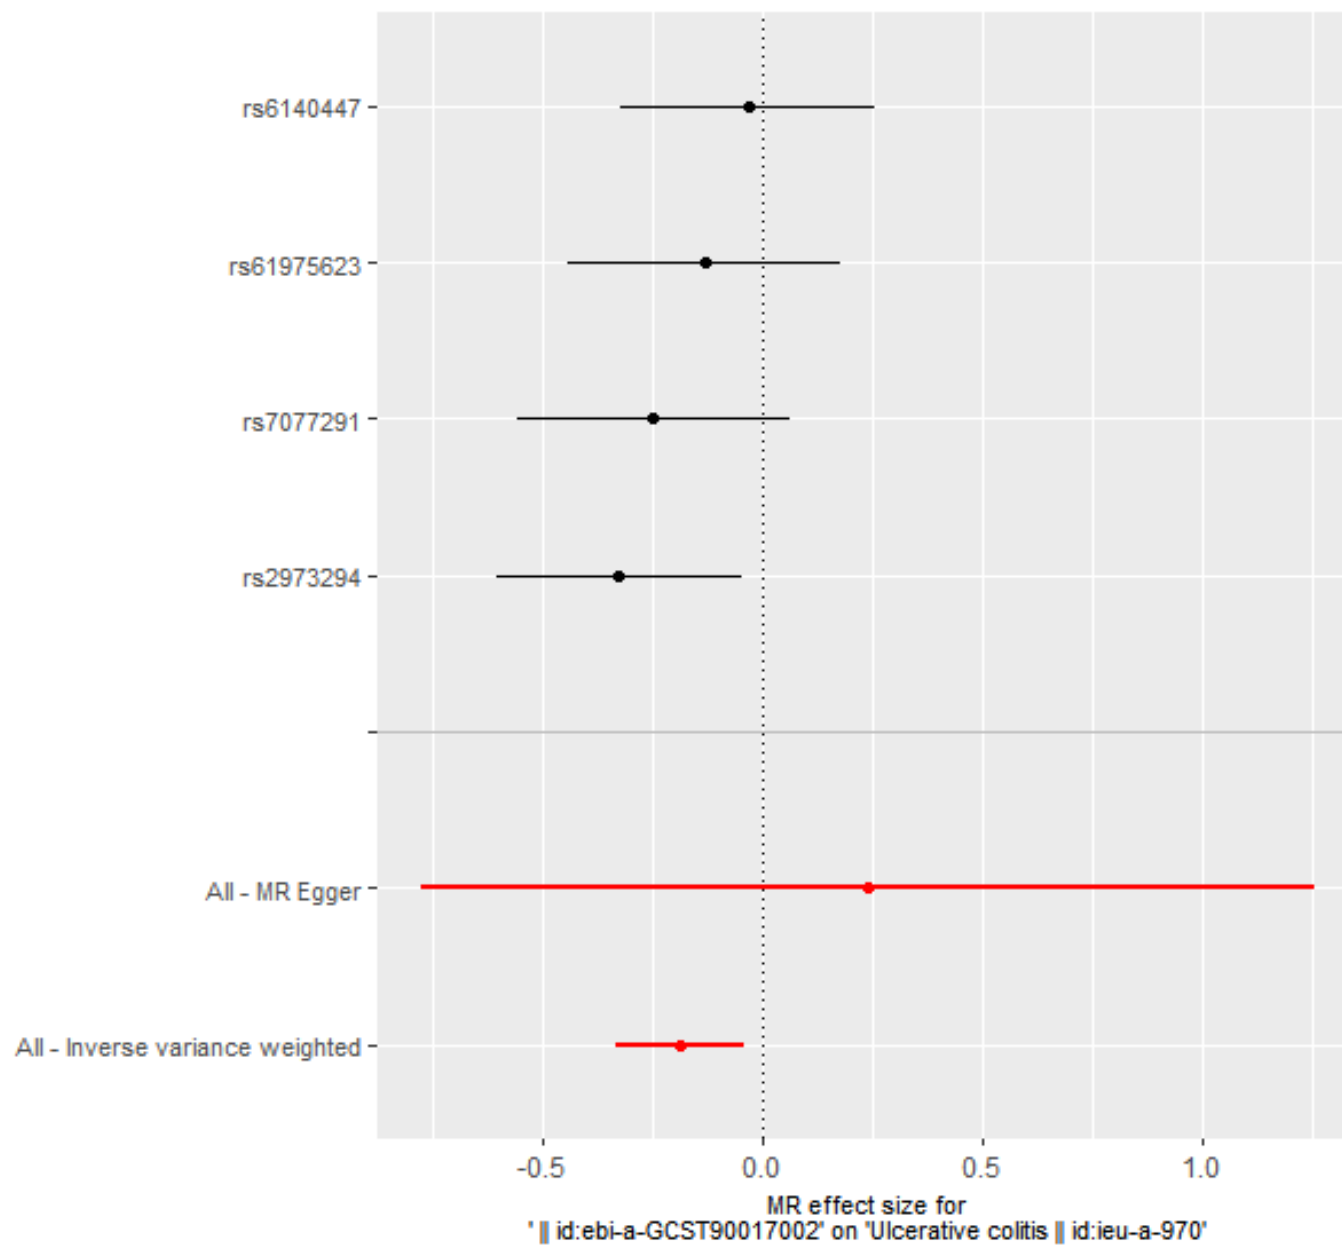

### MR Test

- Inverse variance weighted
- MR Egger
- Simple mode
- Weighted median
- Weighted mode

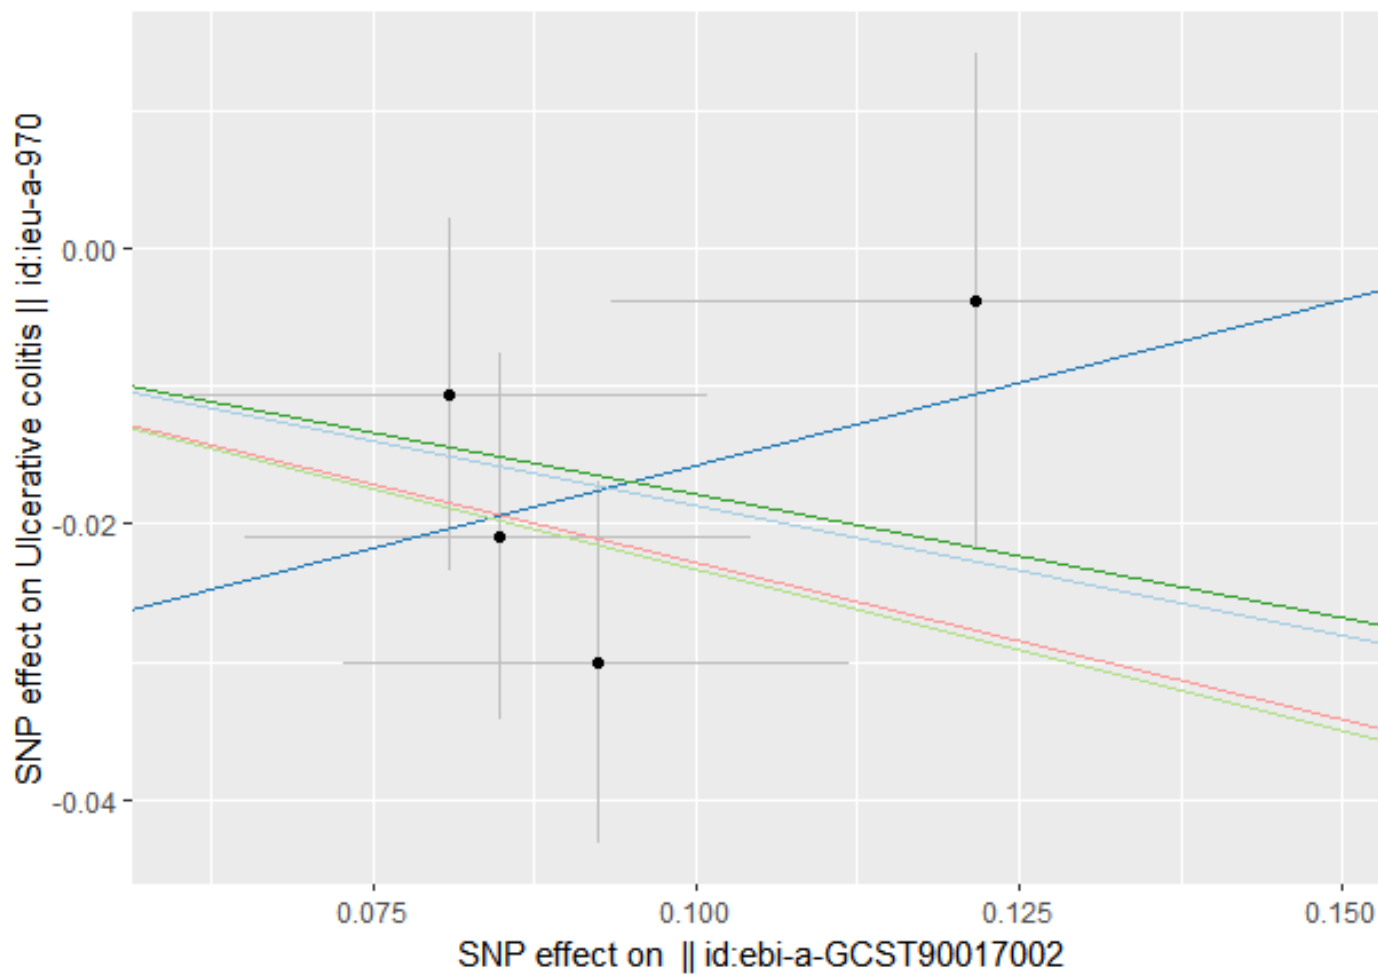



**Figure 129** Leave-one-out analysis, funnel plot, MR effect size and scatter plot for gut microbiota abundance (genus Lachnospiraceae NC2004 group id.11316) on ulcerative colitis

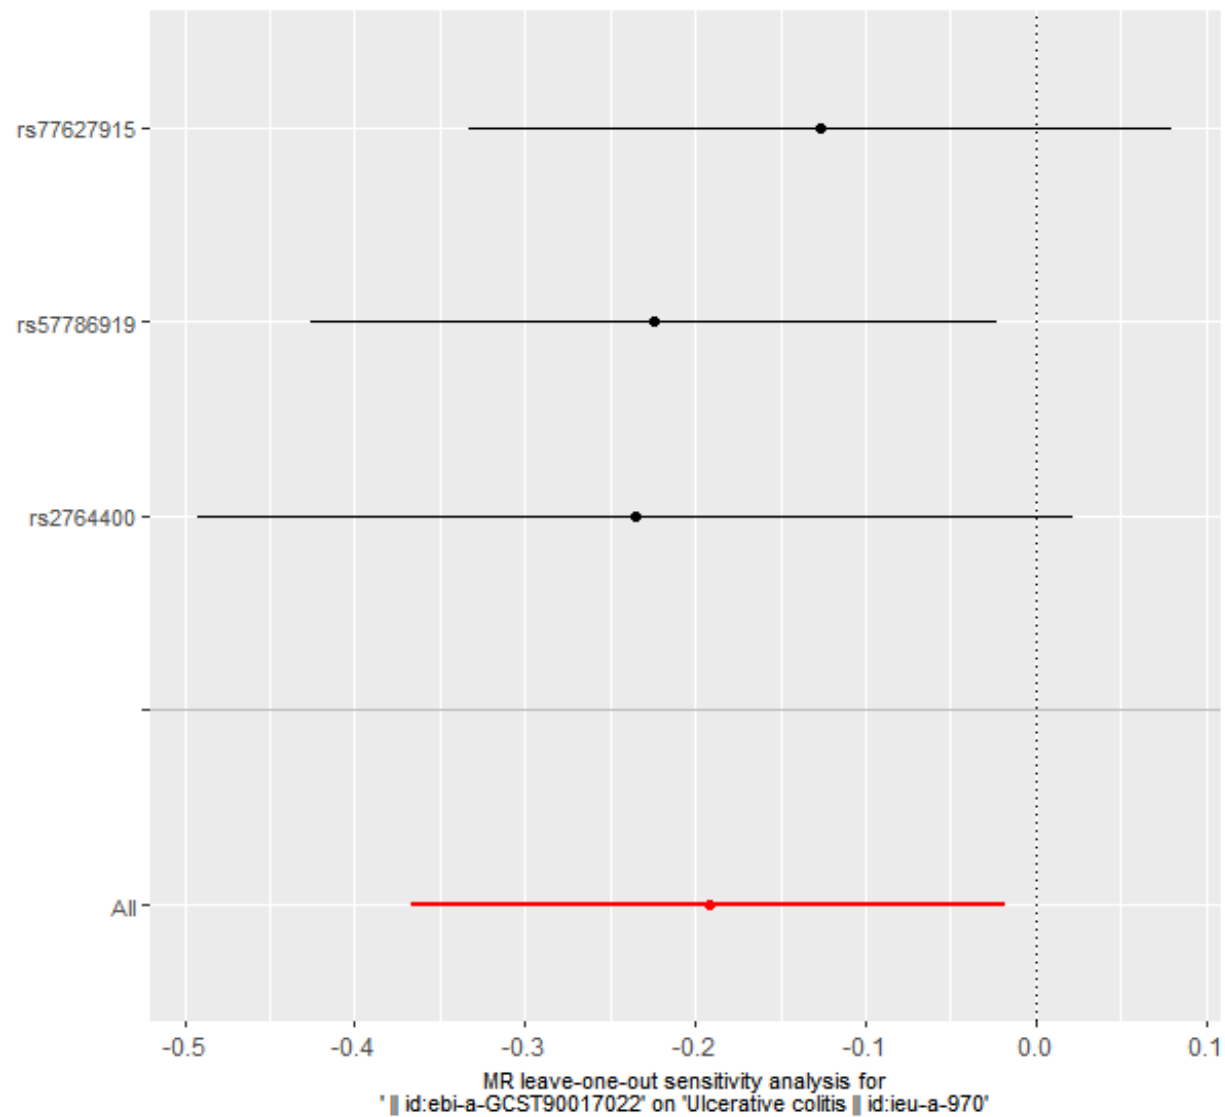

MR Method

- Inverse variance weighted
- MR Egger

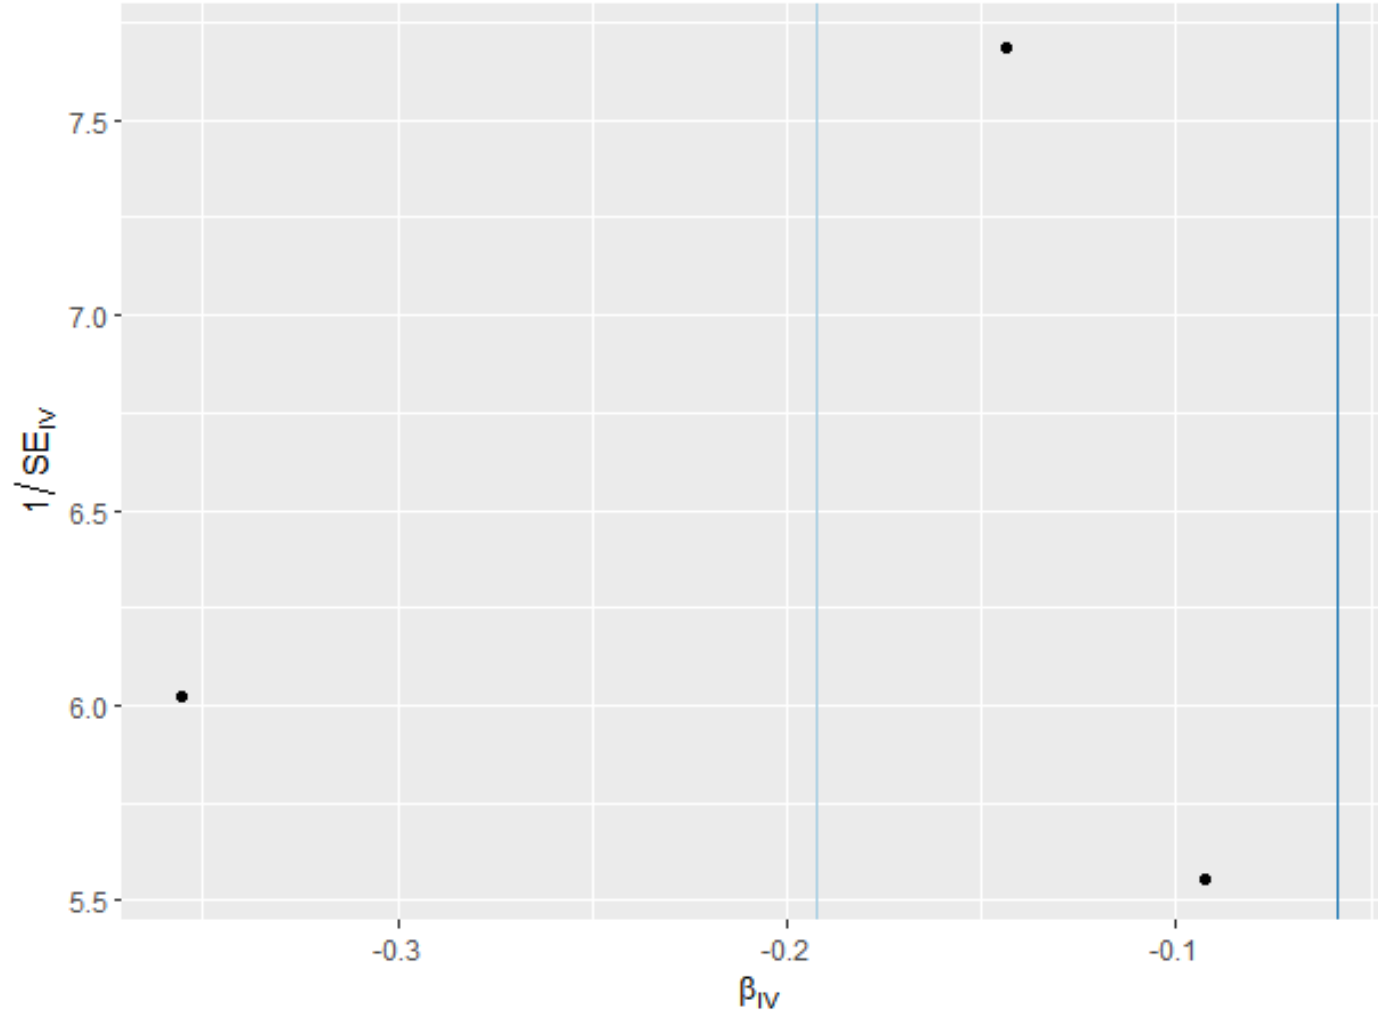

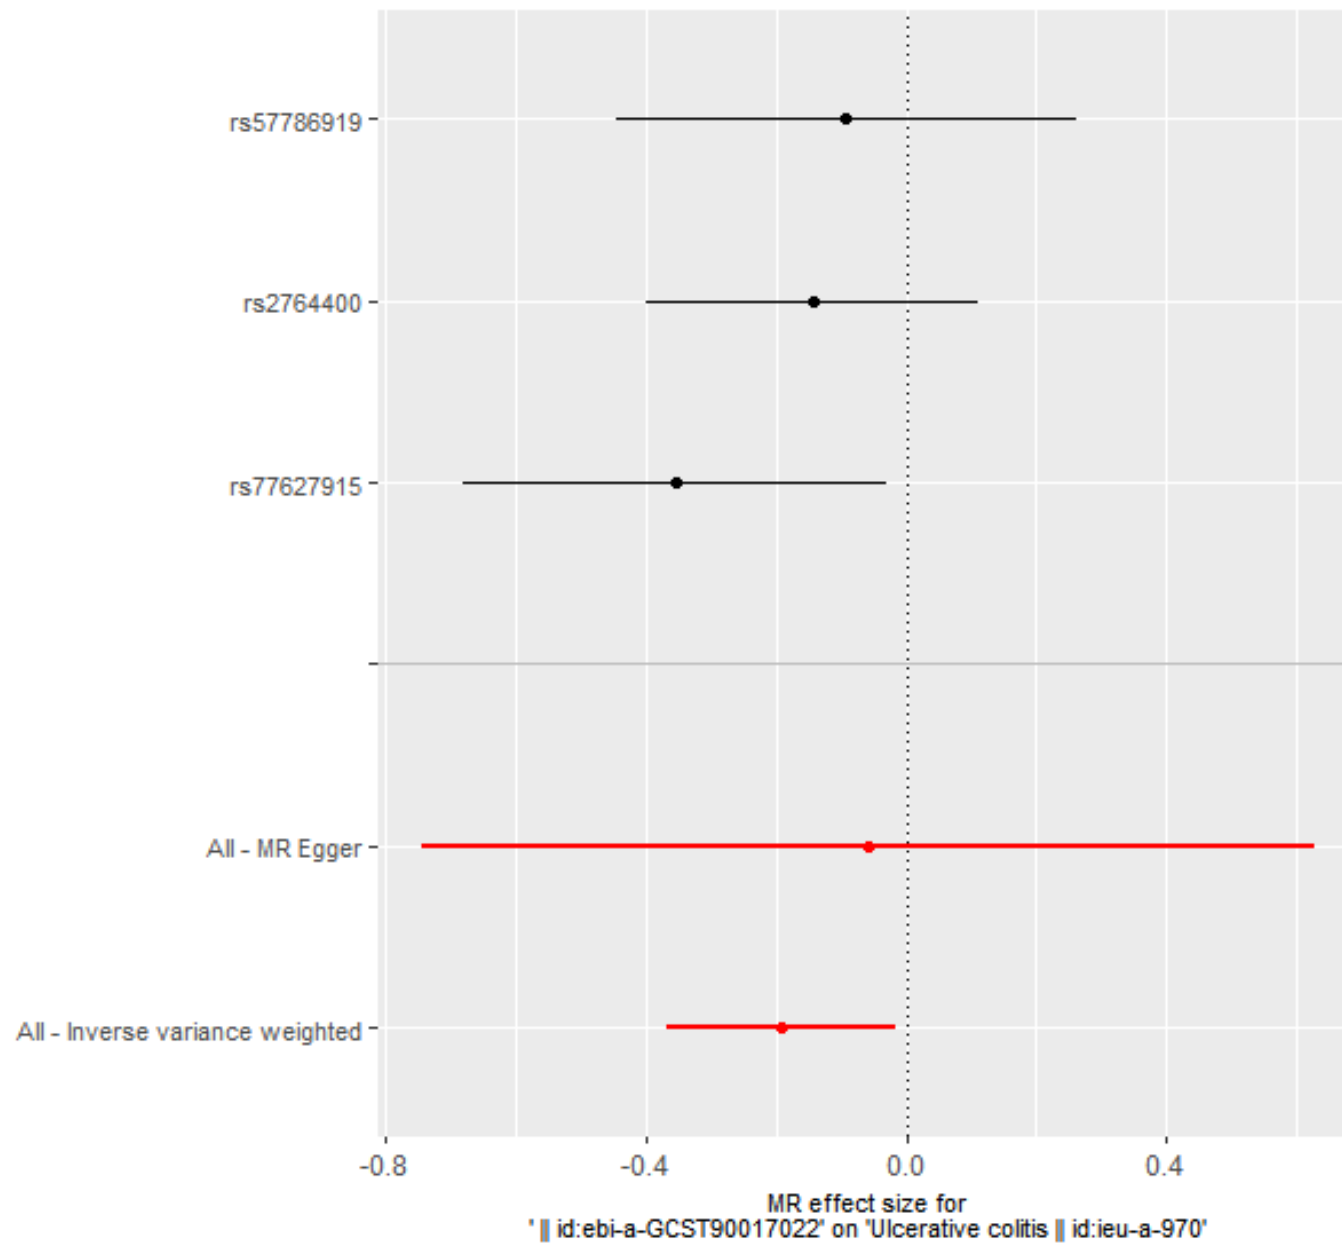

### MR Test

- Inverse variance weighted
- MR Egger
- Simple mode
- Weighted median
- Weighted mode

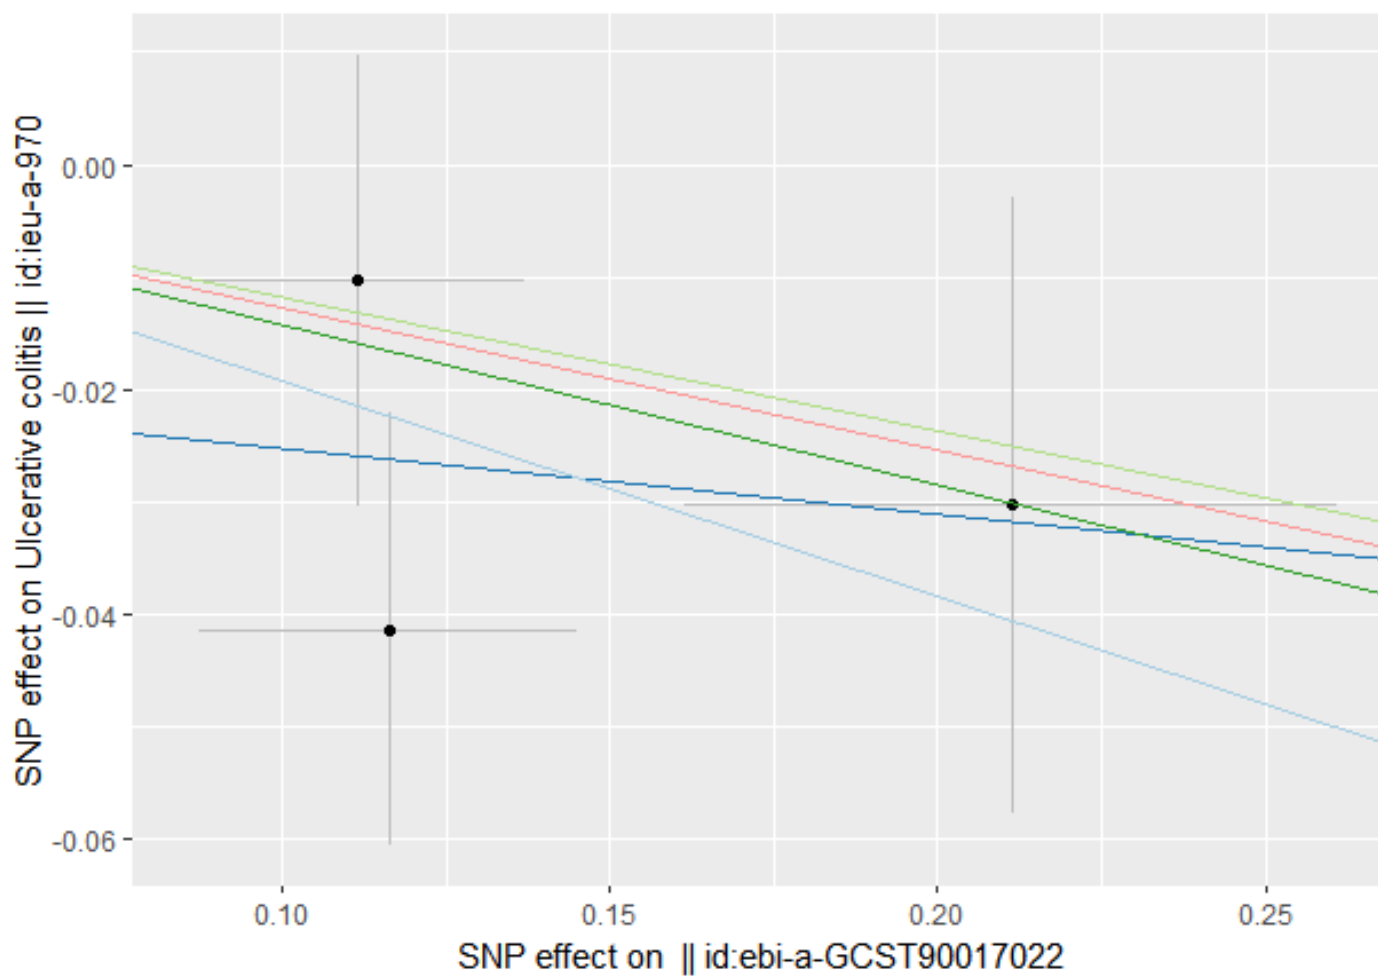

**Figure 130** Leave-one-out analysis, funnel plot, MR effect size and scatter plot for gut microbiota abundance (order Rhodospirillales id.2667) on ulcerative colitis

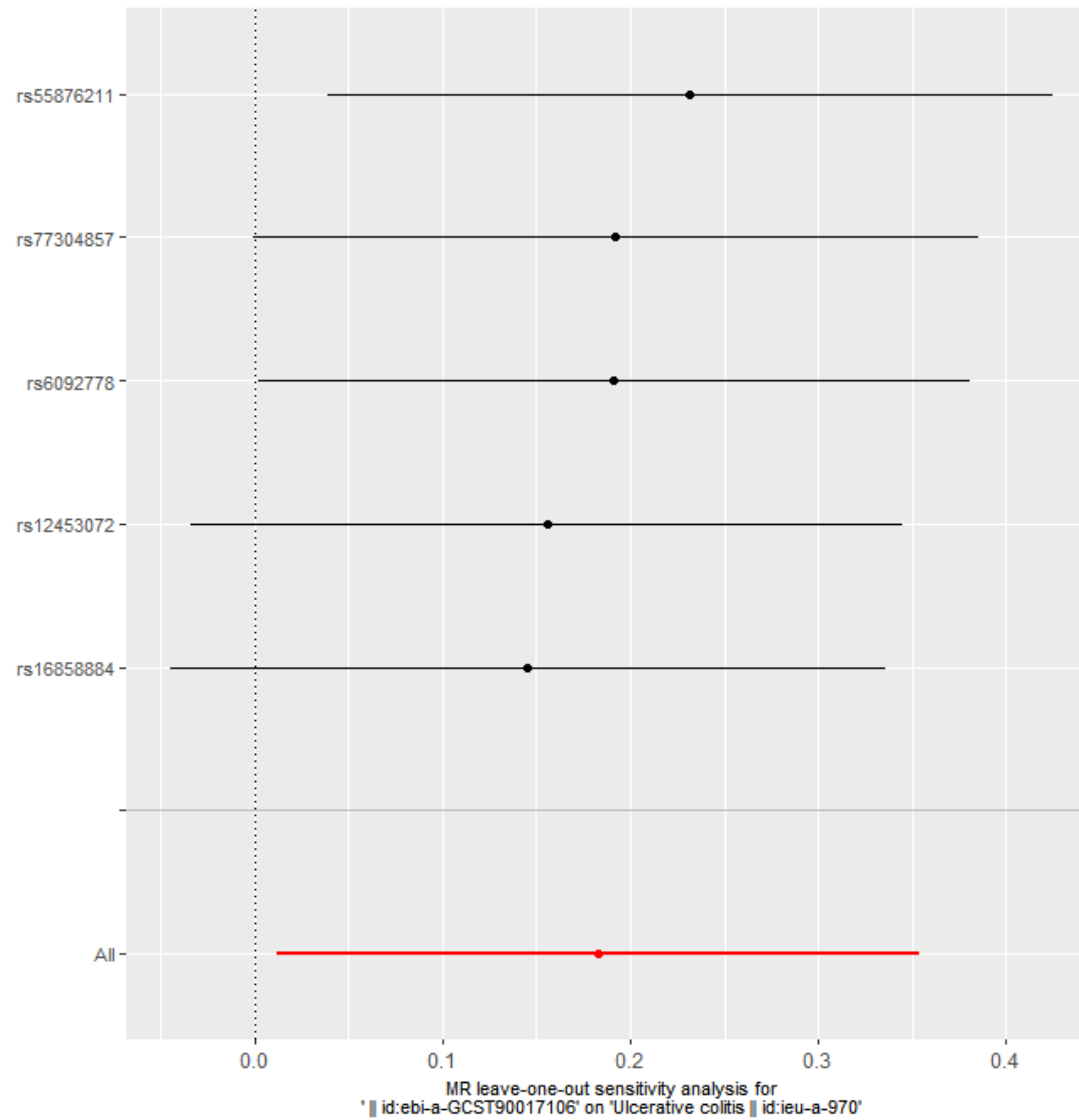

MR Method

- Inverse variance weighted
- MR Egger

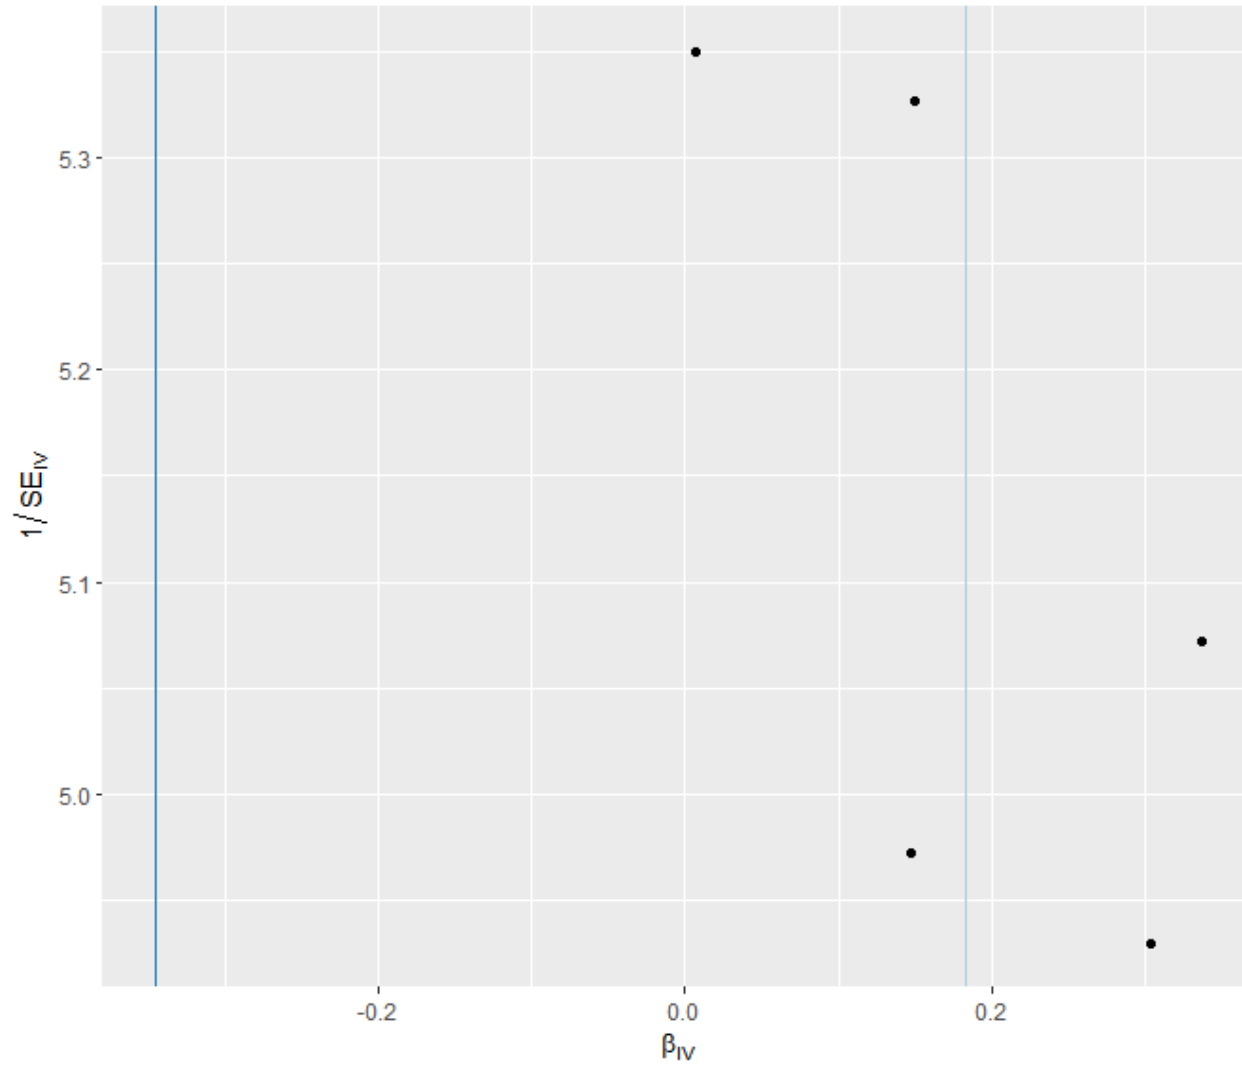

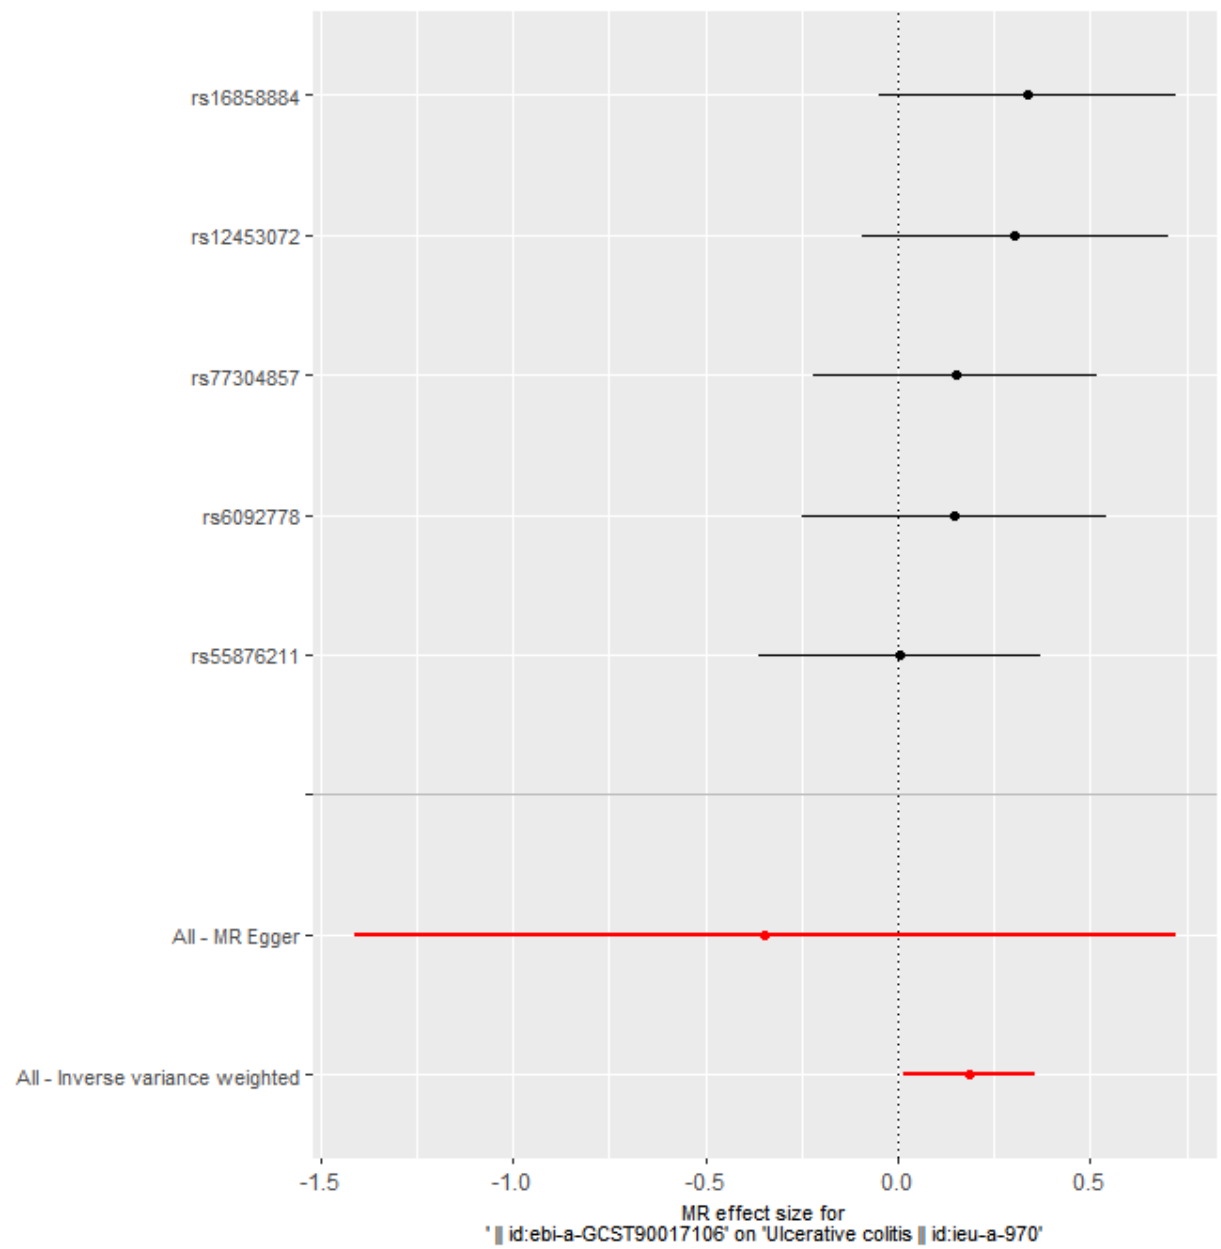

MR Test

- Inverse variance weighted
- MR Egger
- Simple mode
- Weighted median
- Weighted mode

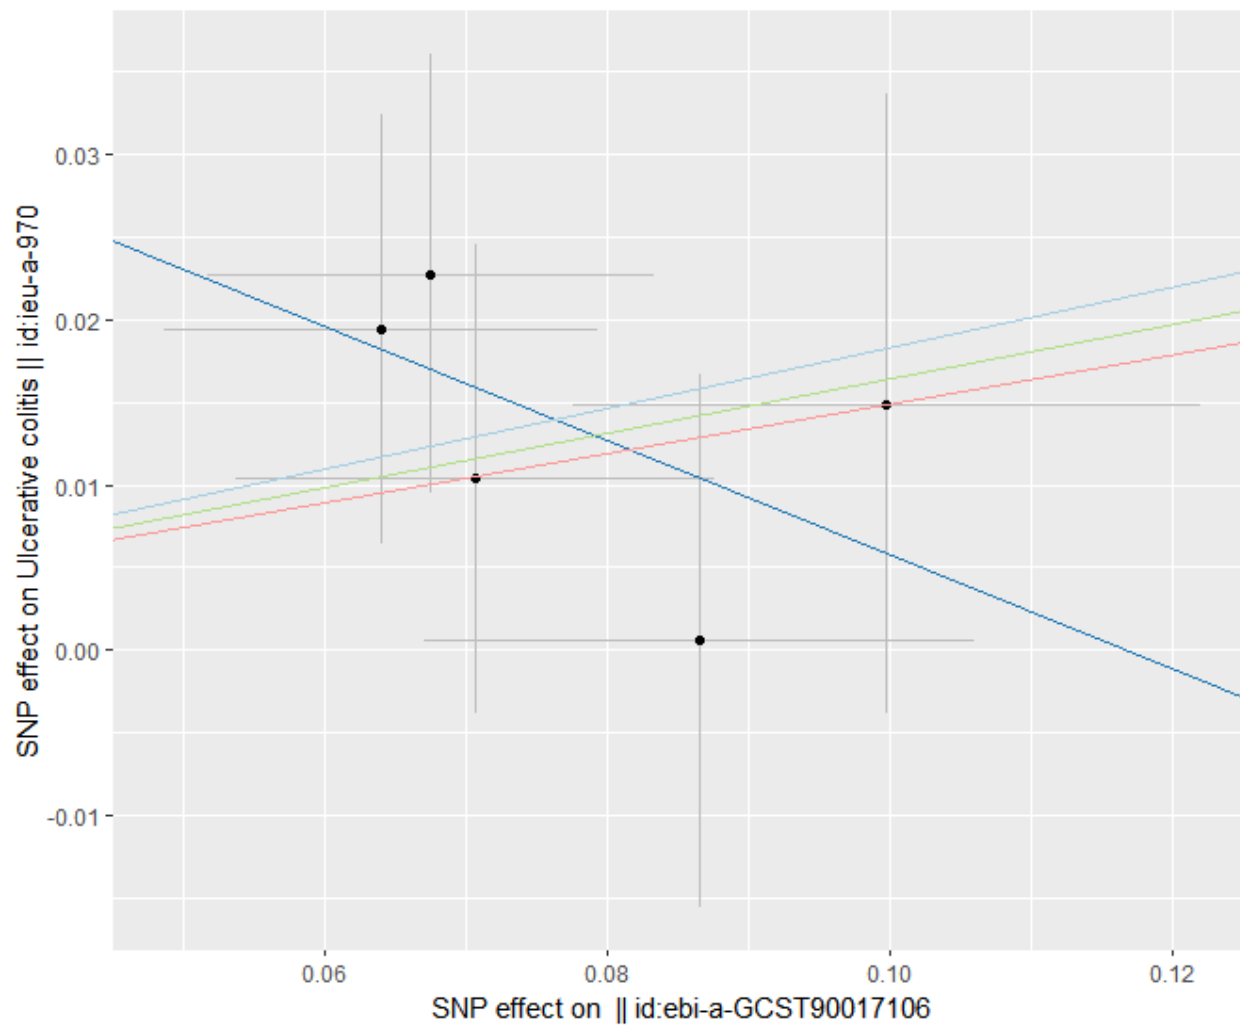



**Figure 131** Leave-one-out analysis, funnel plot, MR effect size and scatter plot for gut microbiota abundance (family Enterobacteriaceae id.3469) on colorectal cancer

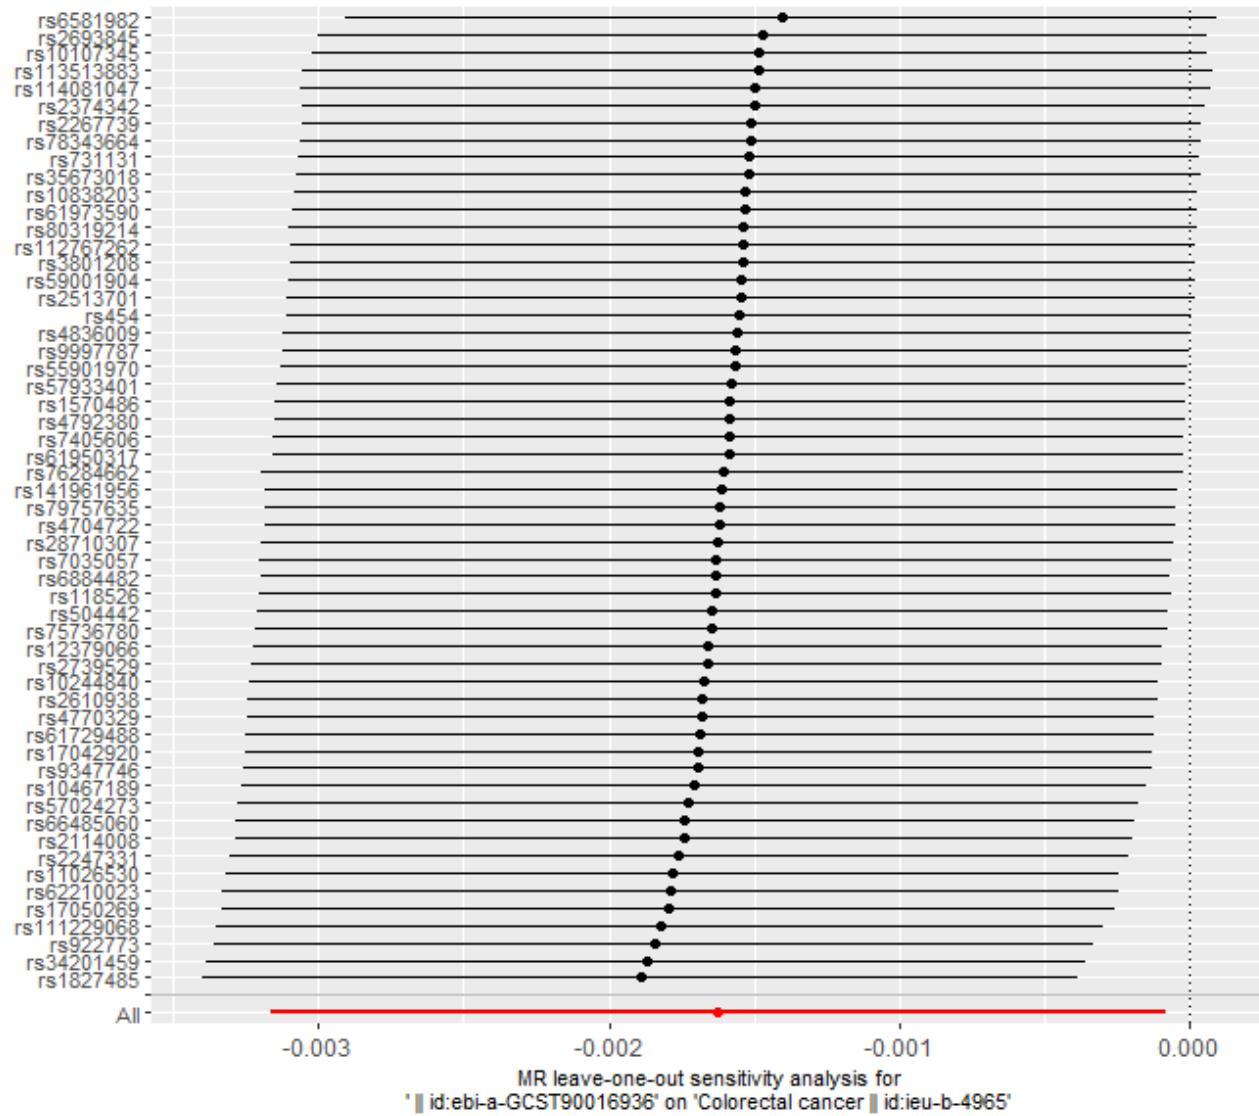

MR Method

- Inverse variance weighted
- MR Egger

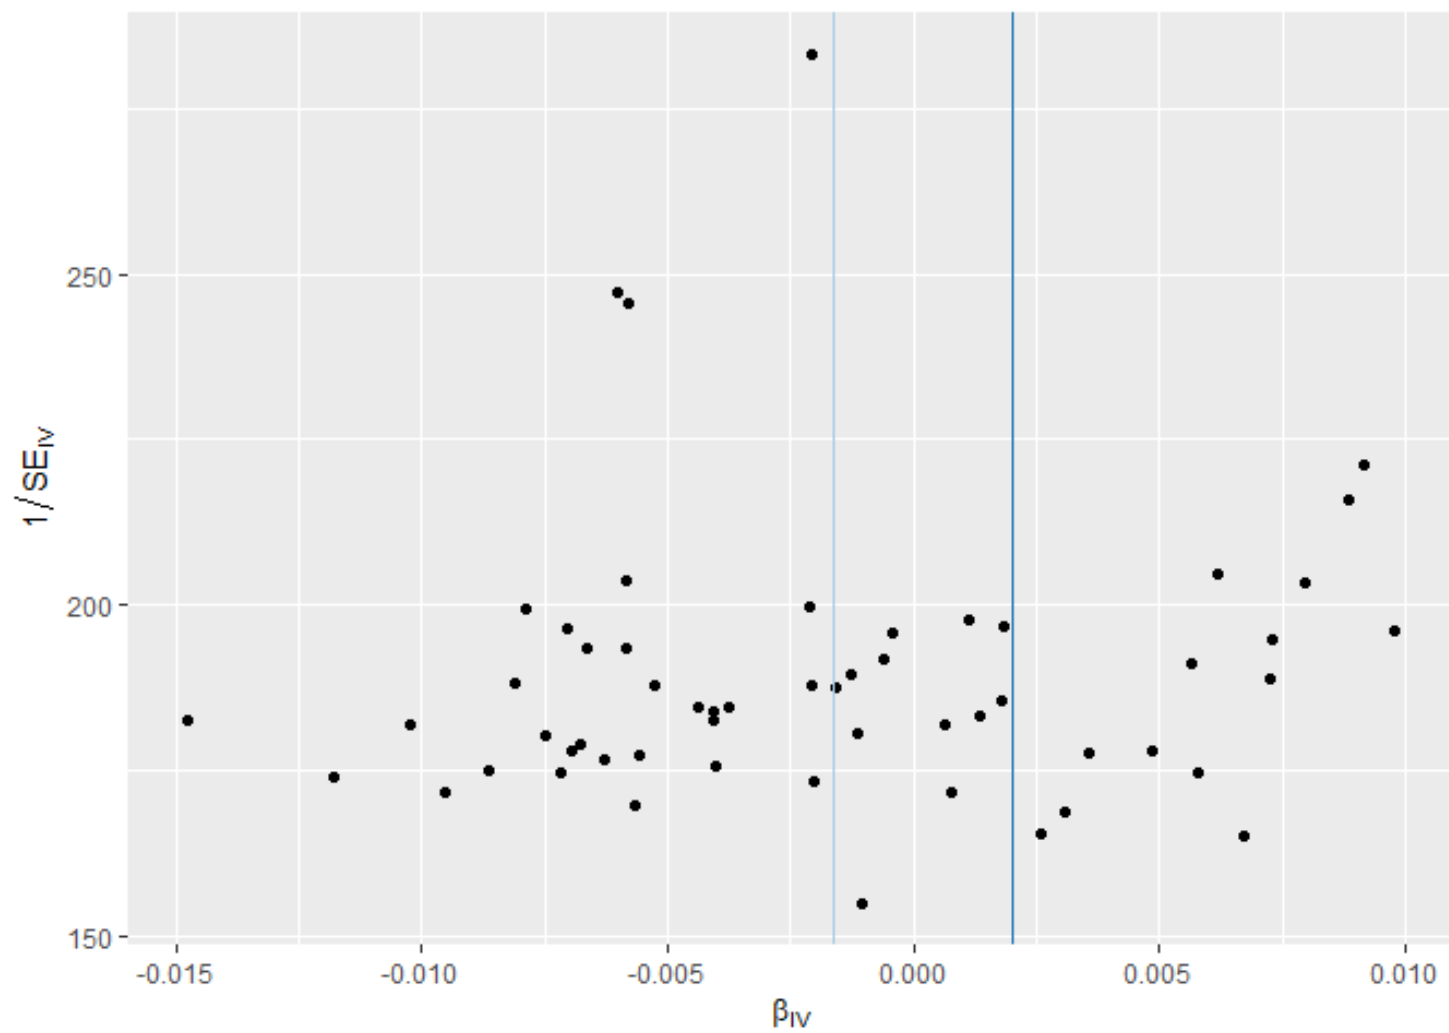

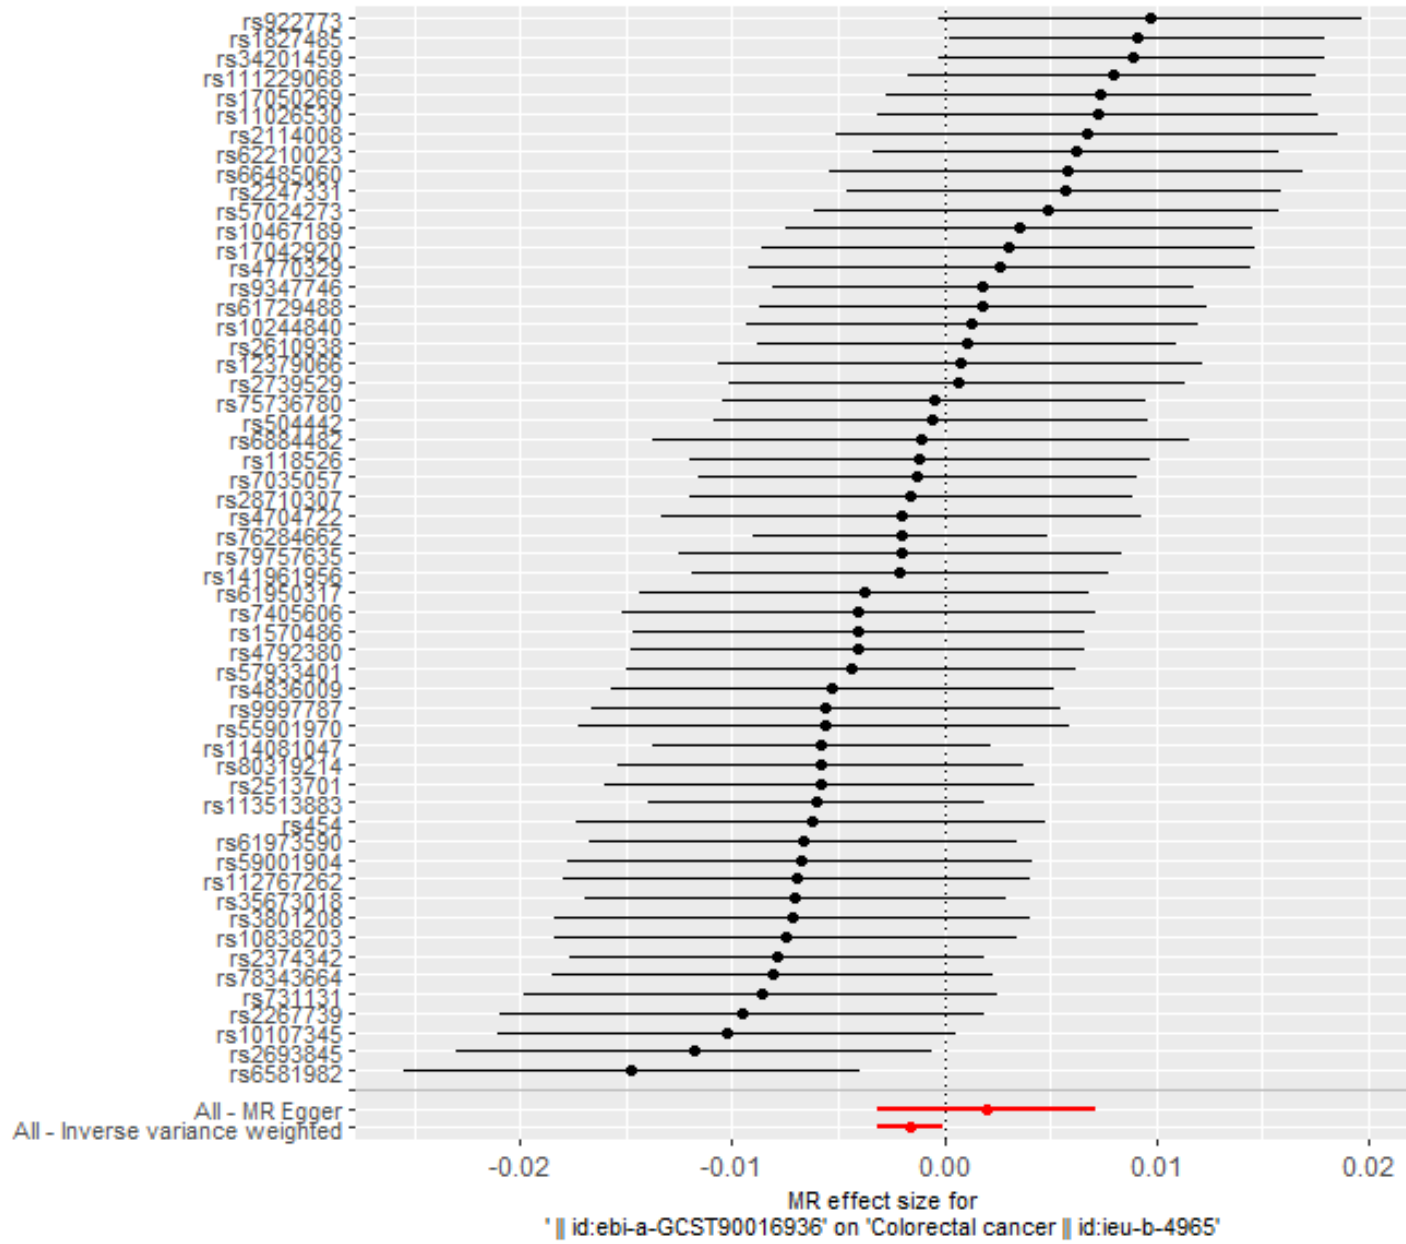

MR Test

- Inverse variance weighted
- MR Egger
- Simple mode
- Weighted median
- Weighted mode

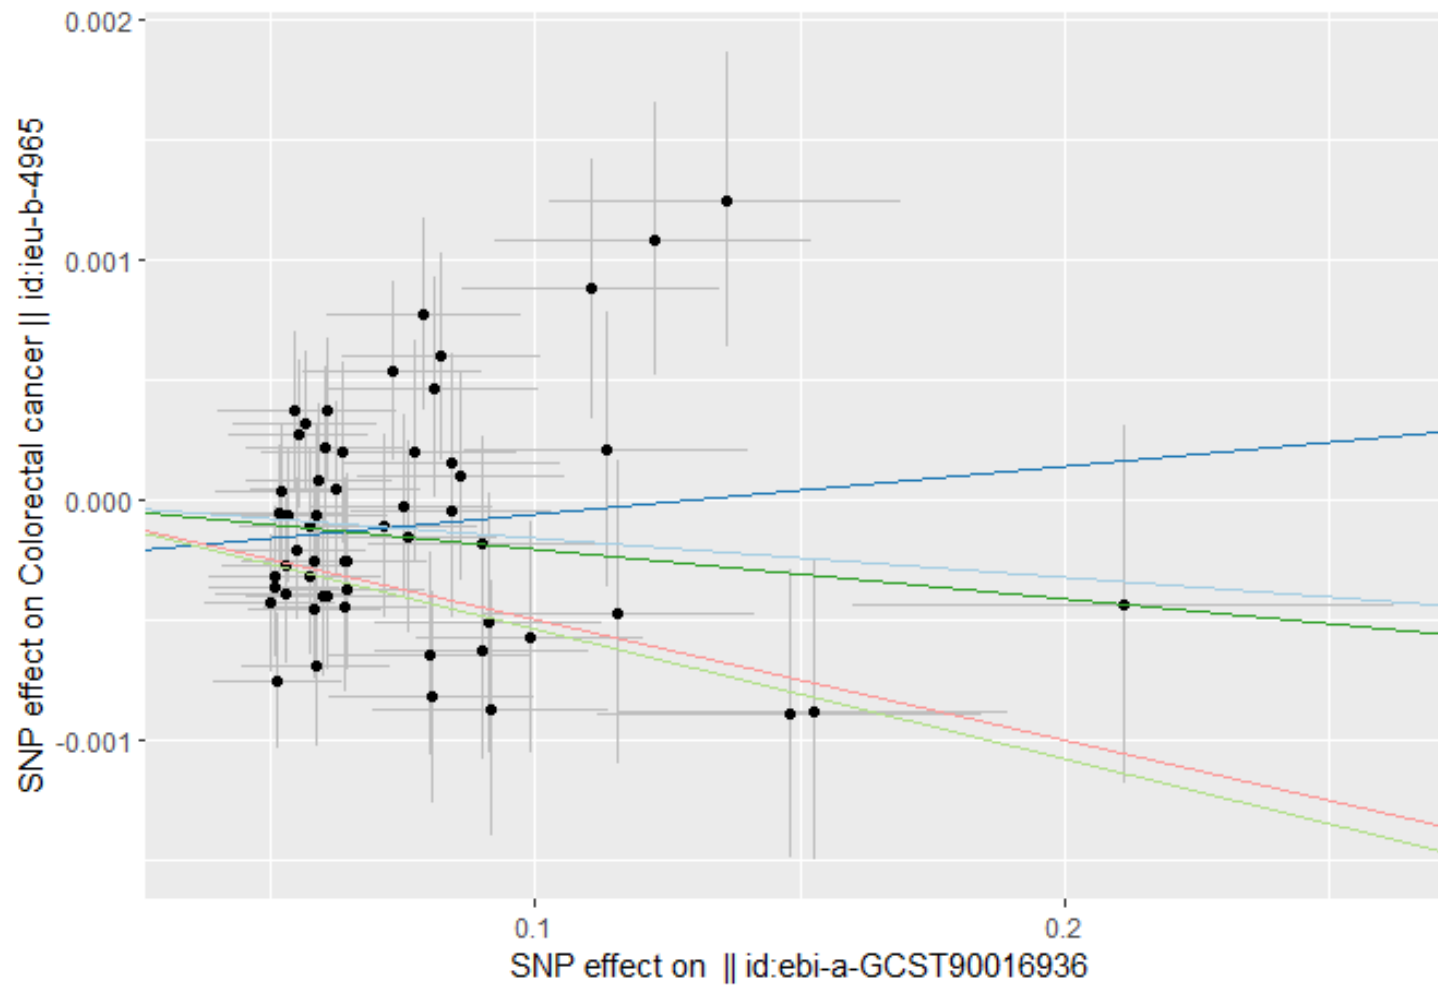

**Figure 132** Leave-one-out analysis, funnel plot, MR effect size and scatter plot for gut microbiota abundance (genus *Anaerostipes* id.1991) on colorectal cancer

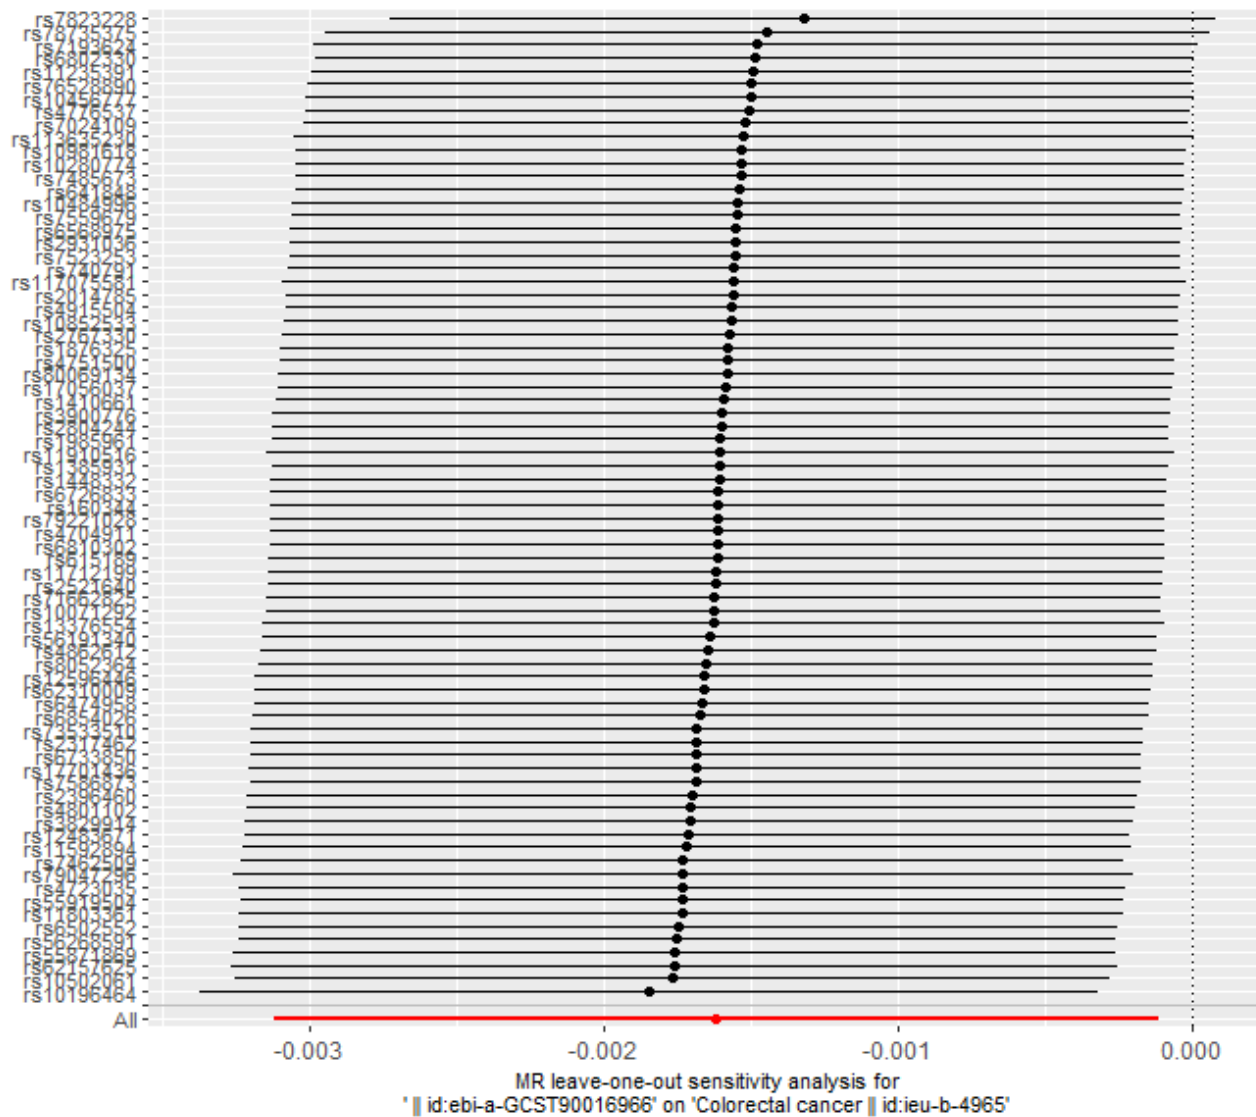

MR Method

- Inverse variance weighted
- MR Egger

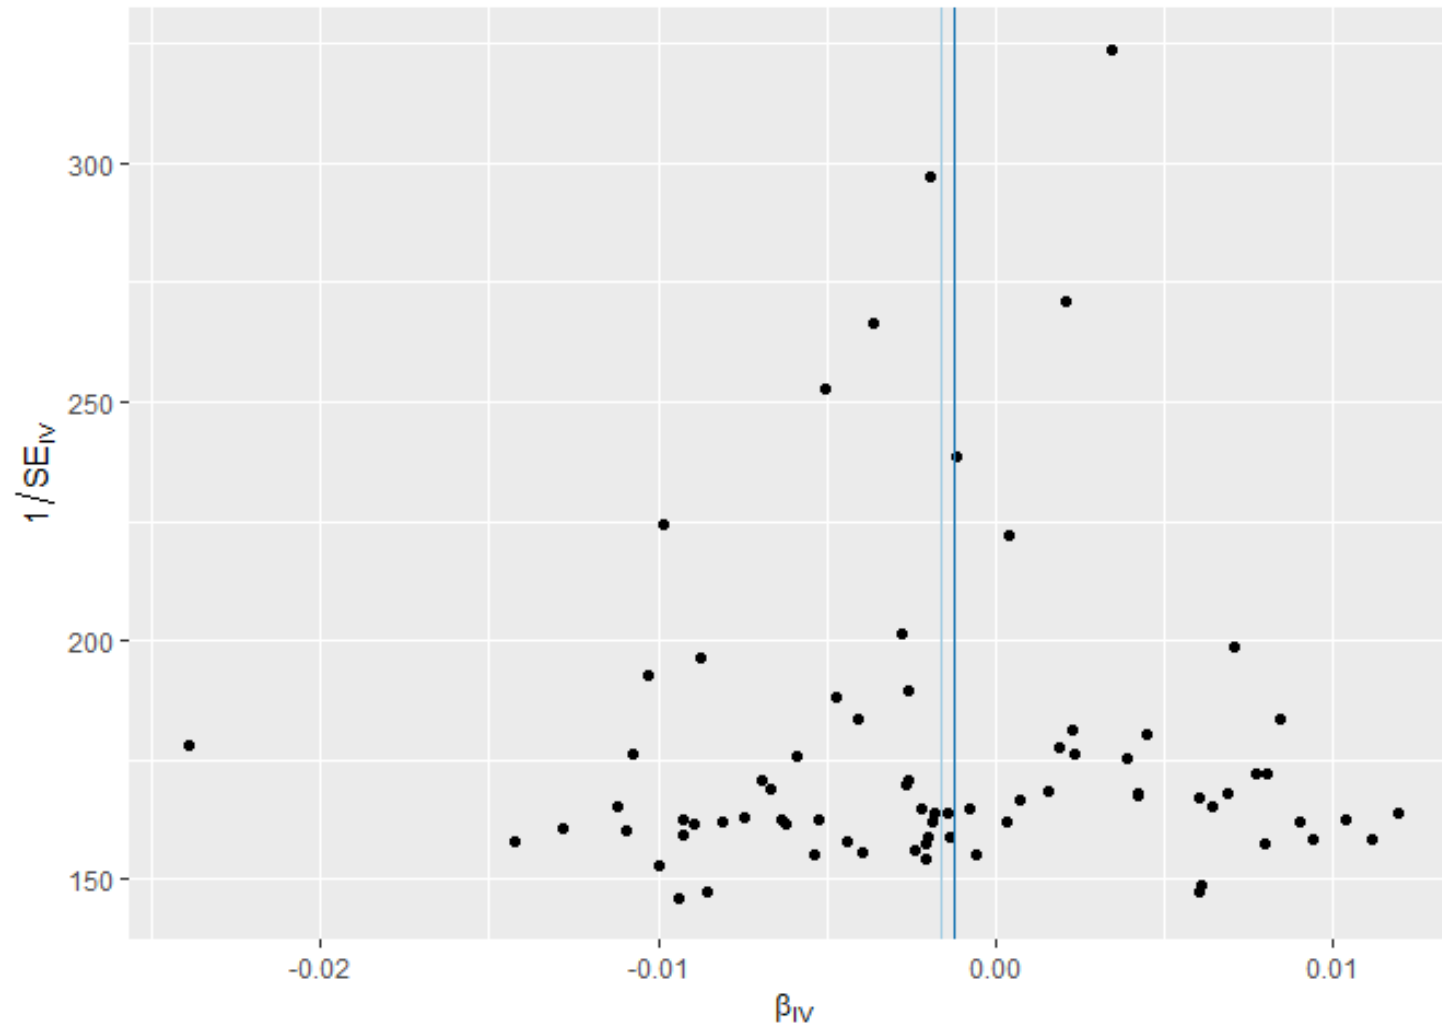

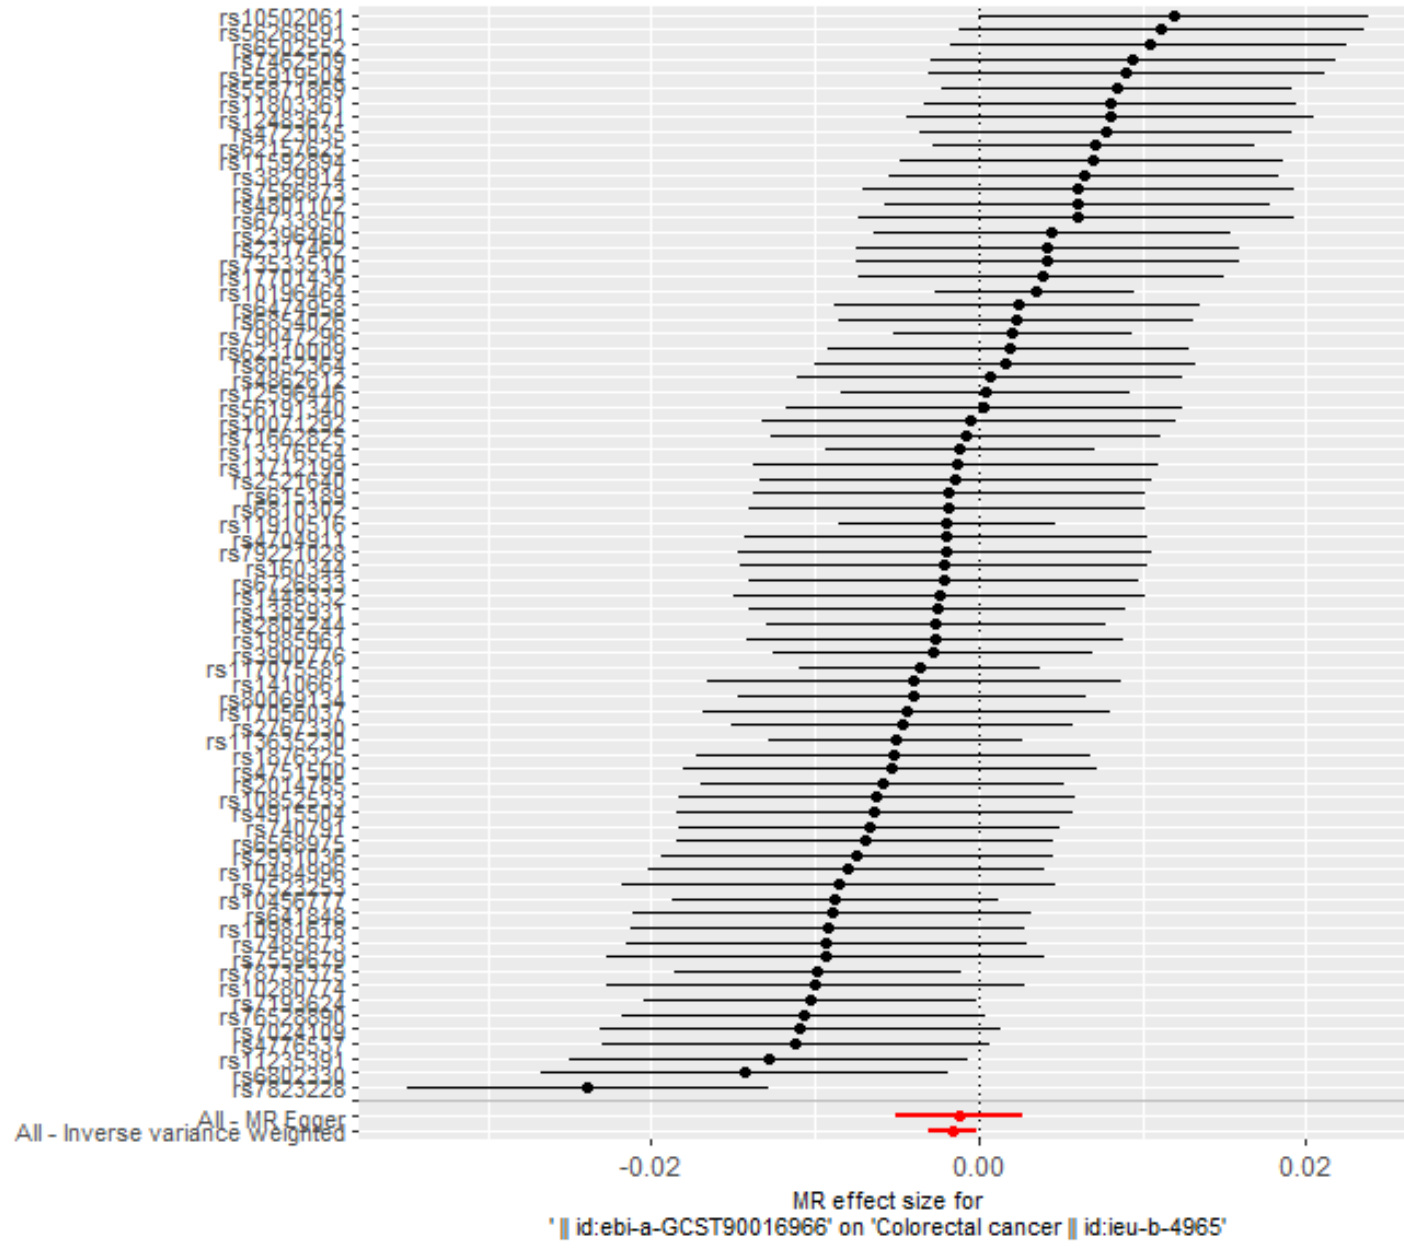

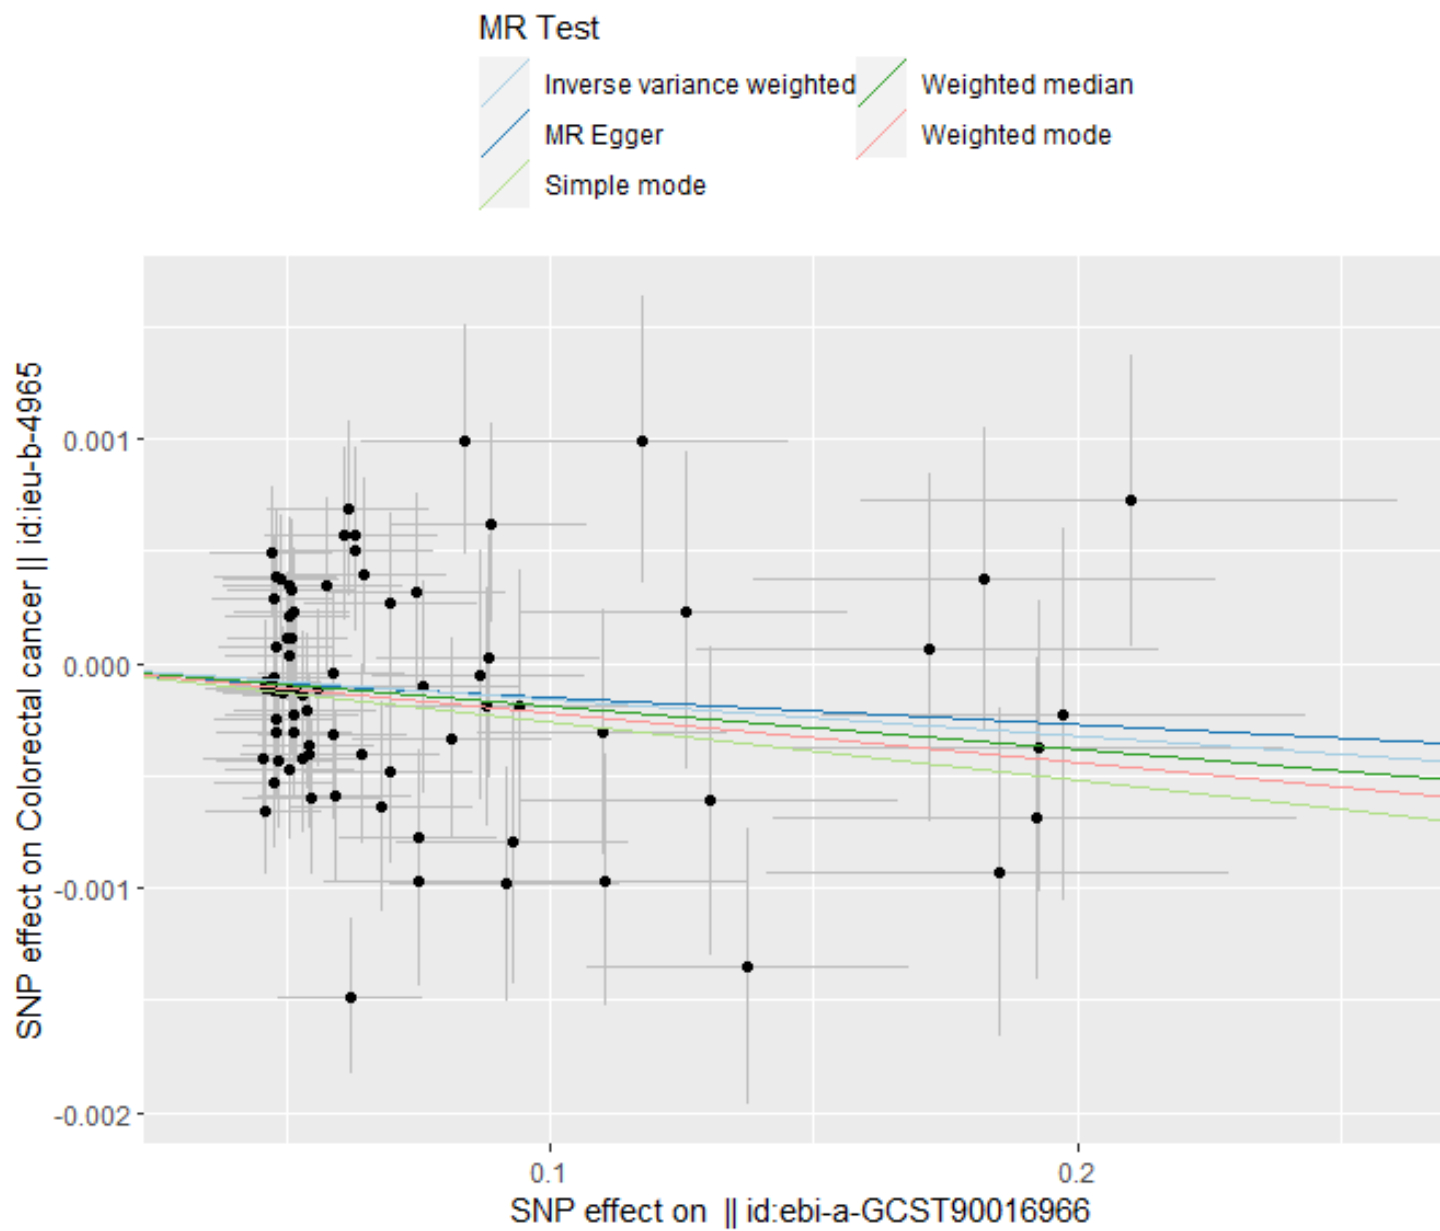



**Figure 133** Leave-one-out analysis, funnel plot, MR effect size and scatter plot for gut microbiota abundance (genus Bilophila id.3170) on colorectal cancer

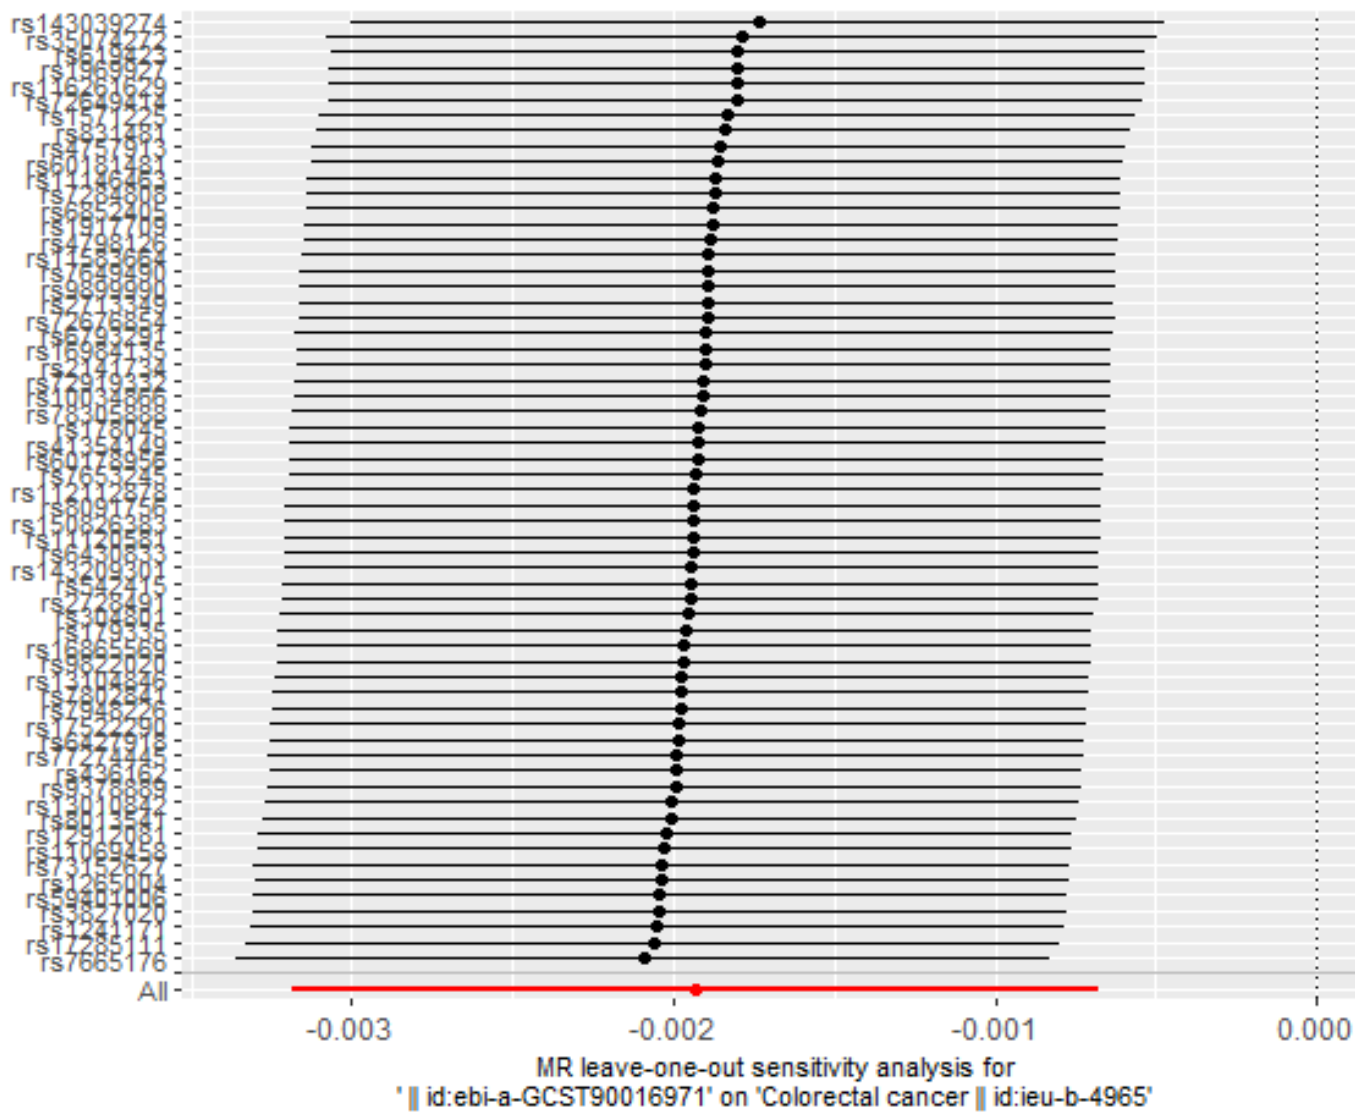

MR Method

- Inverse variance weighted
- MR Egger

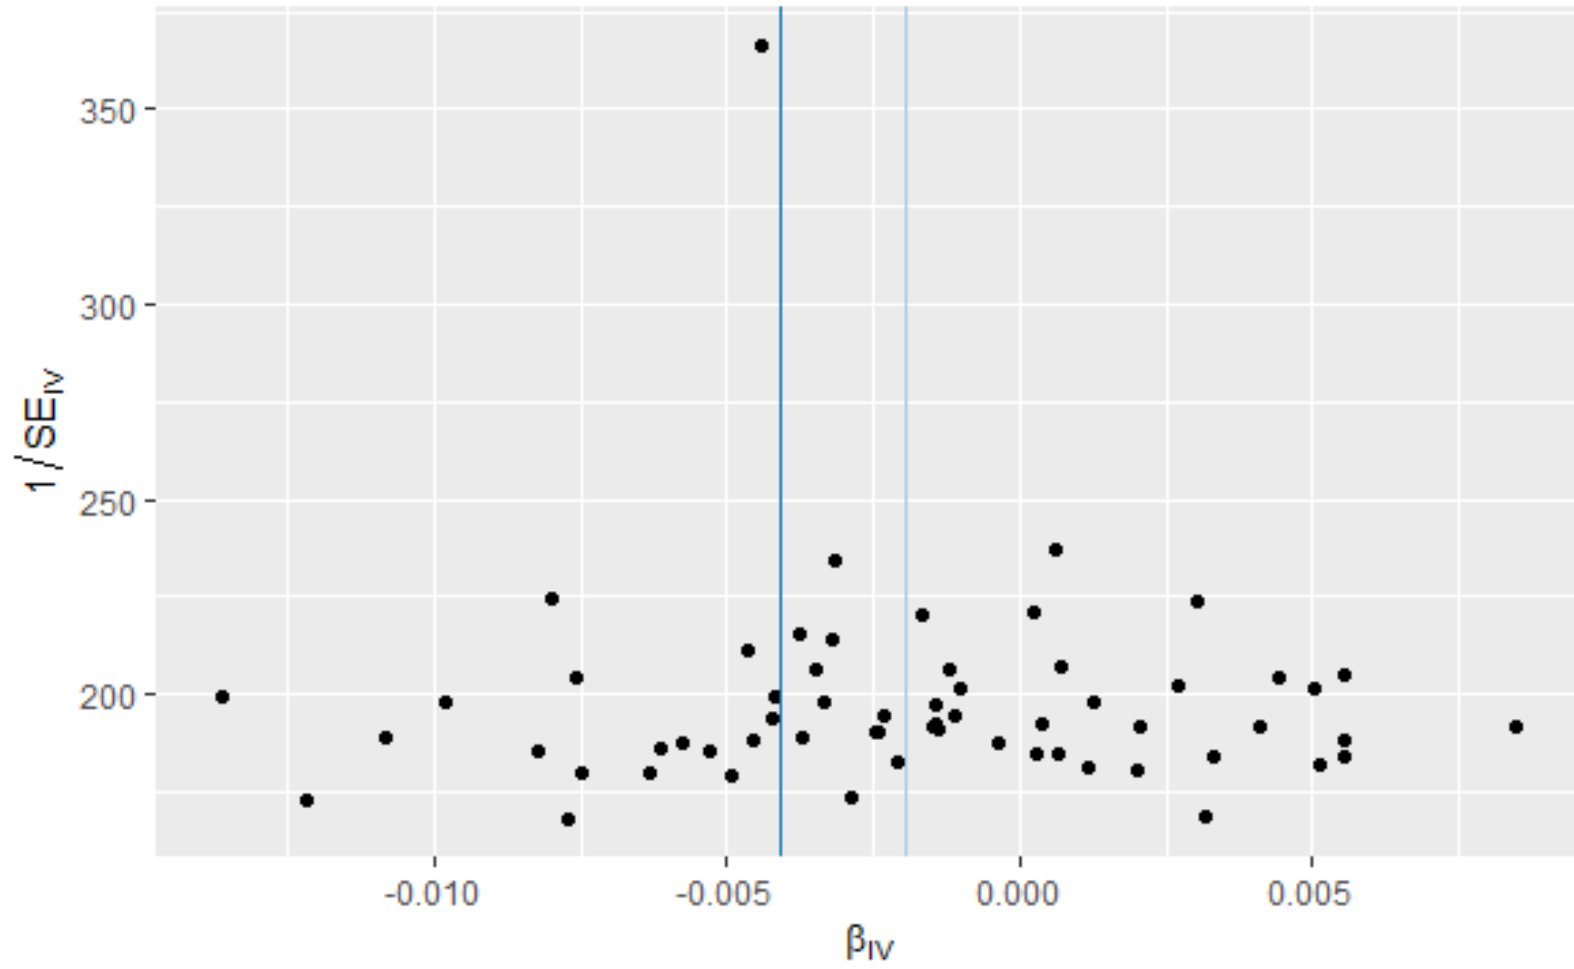

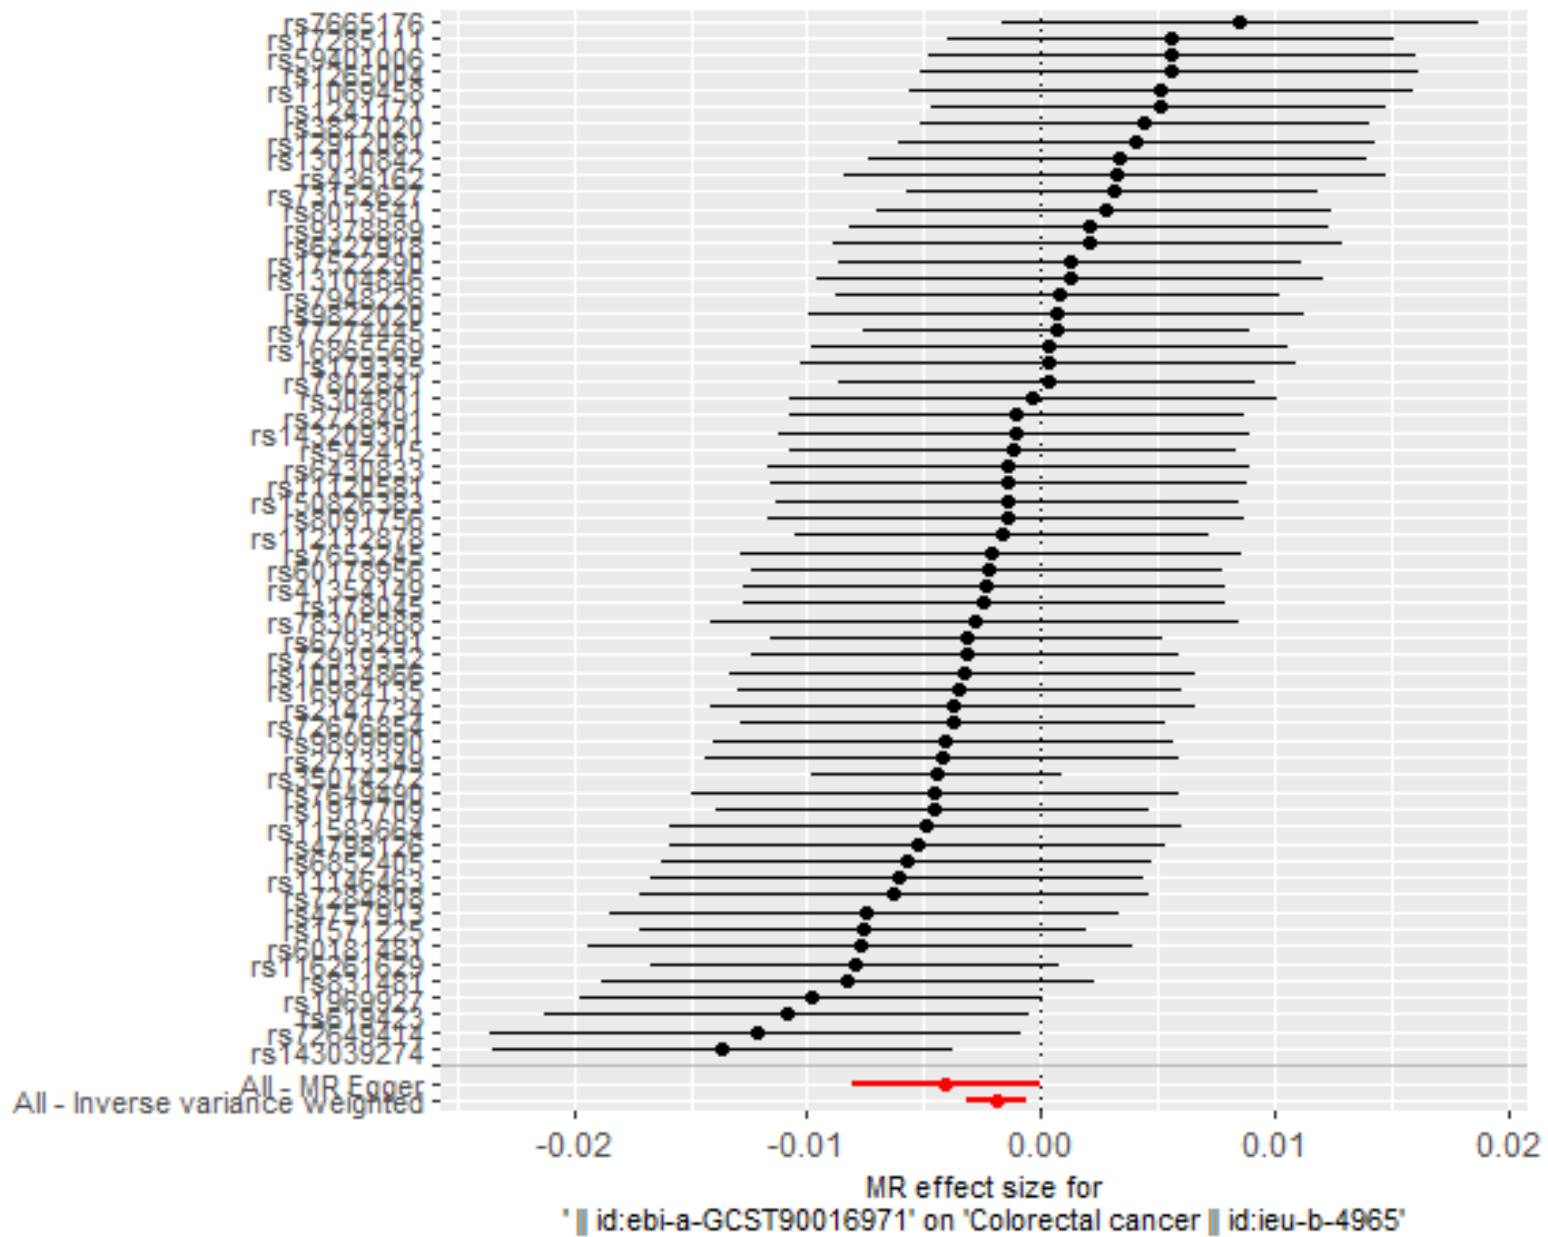

MR Test

- Inverse variance weighted
- MR Egger
- Simple mode
- Weighted median
- Weighted mode

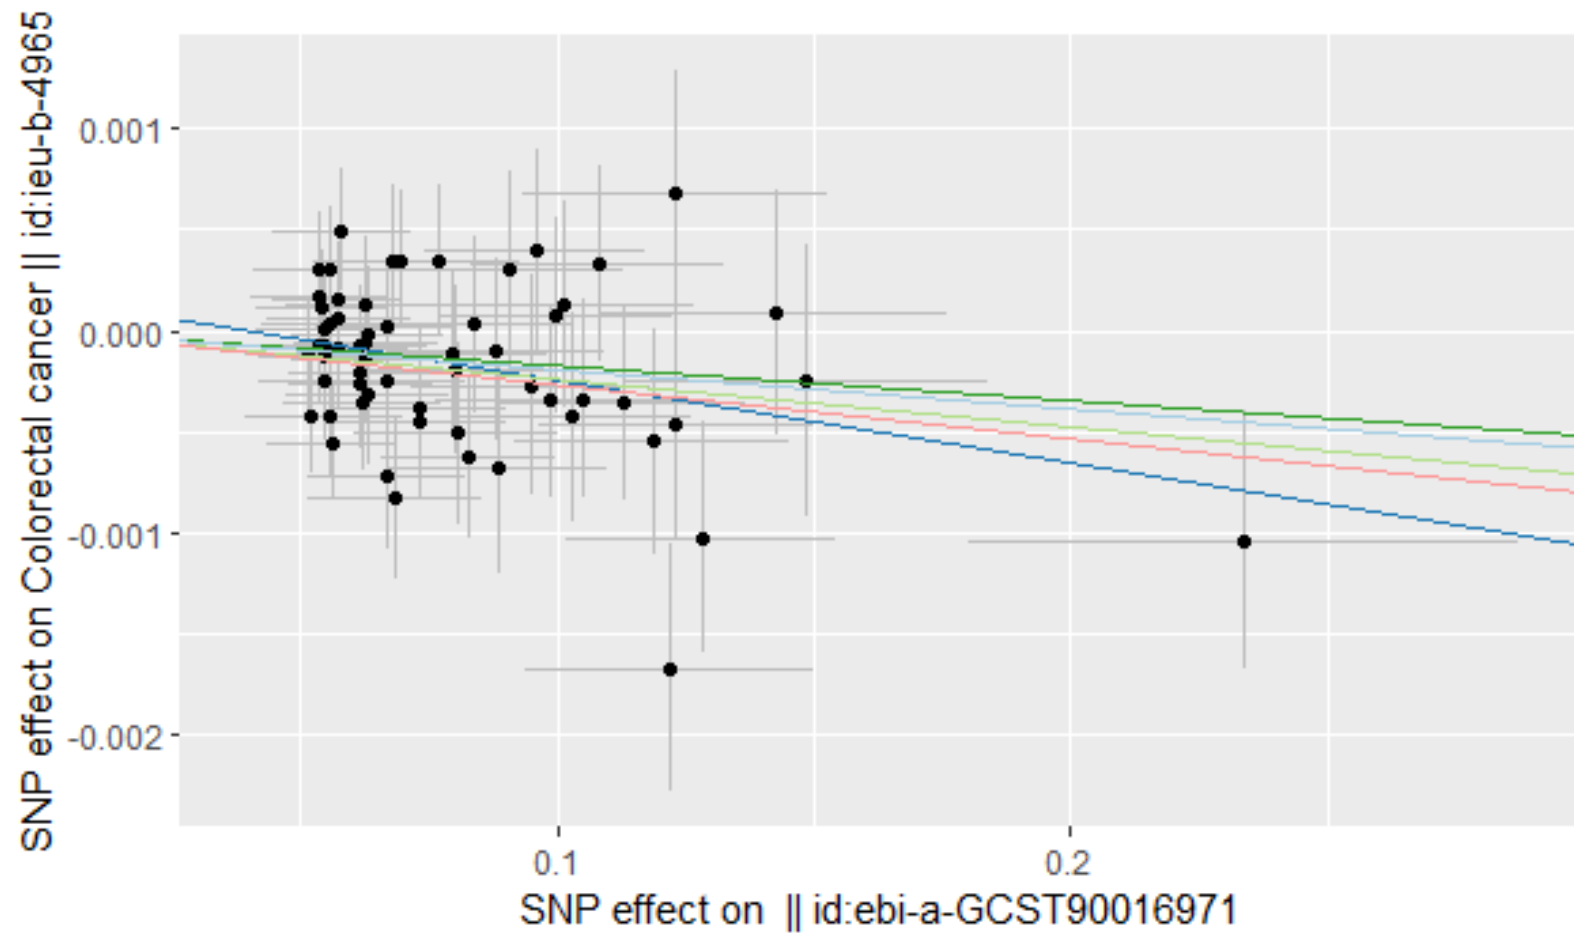

**Figure 134** Leave-one-out analysis, funnel plot, MR effect size and scatter plot for gut microbiota abundance (genus *Erysipelatoclostridium* id.11381) on colorectal cancer

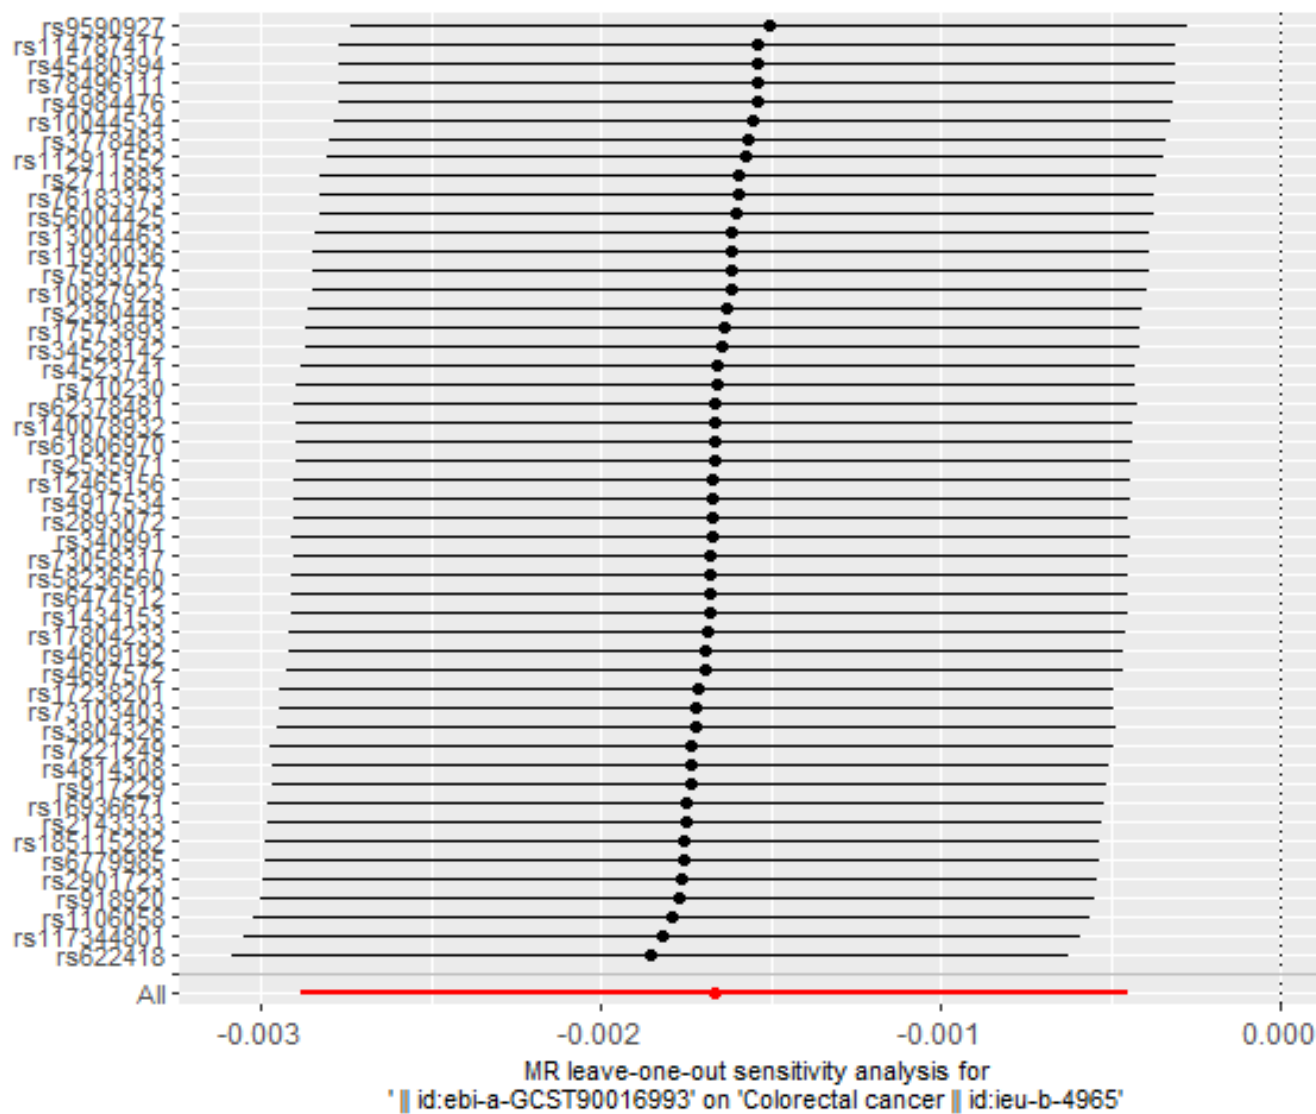





MR Test

- Inverse variance weighted
- MR Egger
- Simple mode
- Weighted median
- Weighted mode

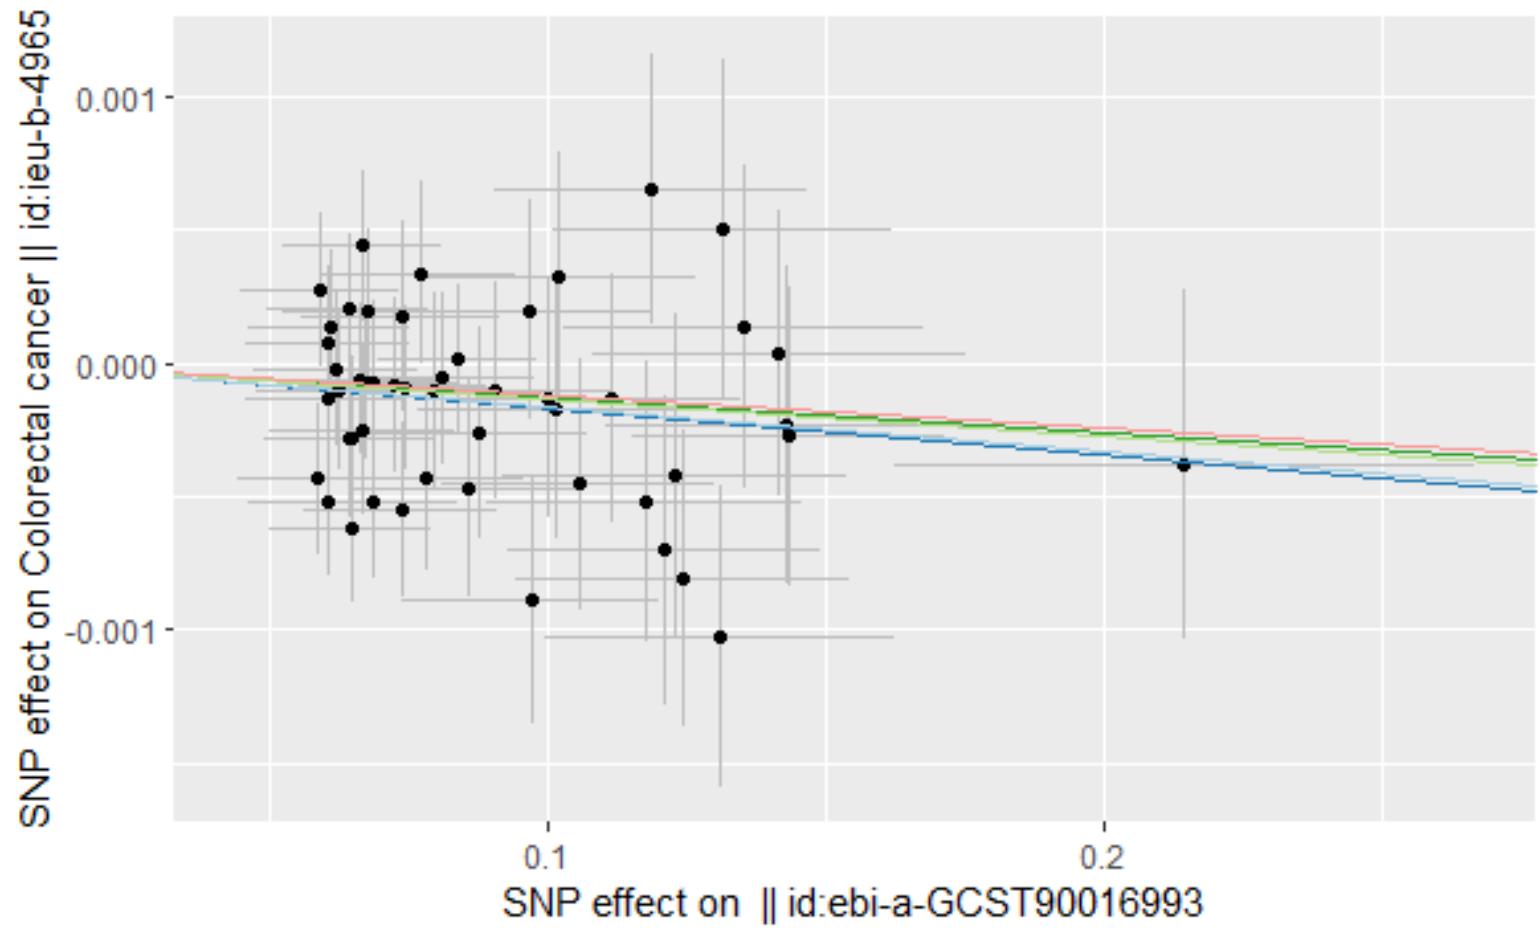







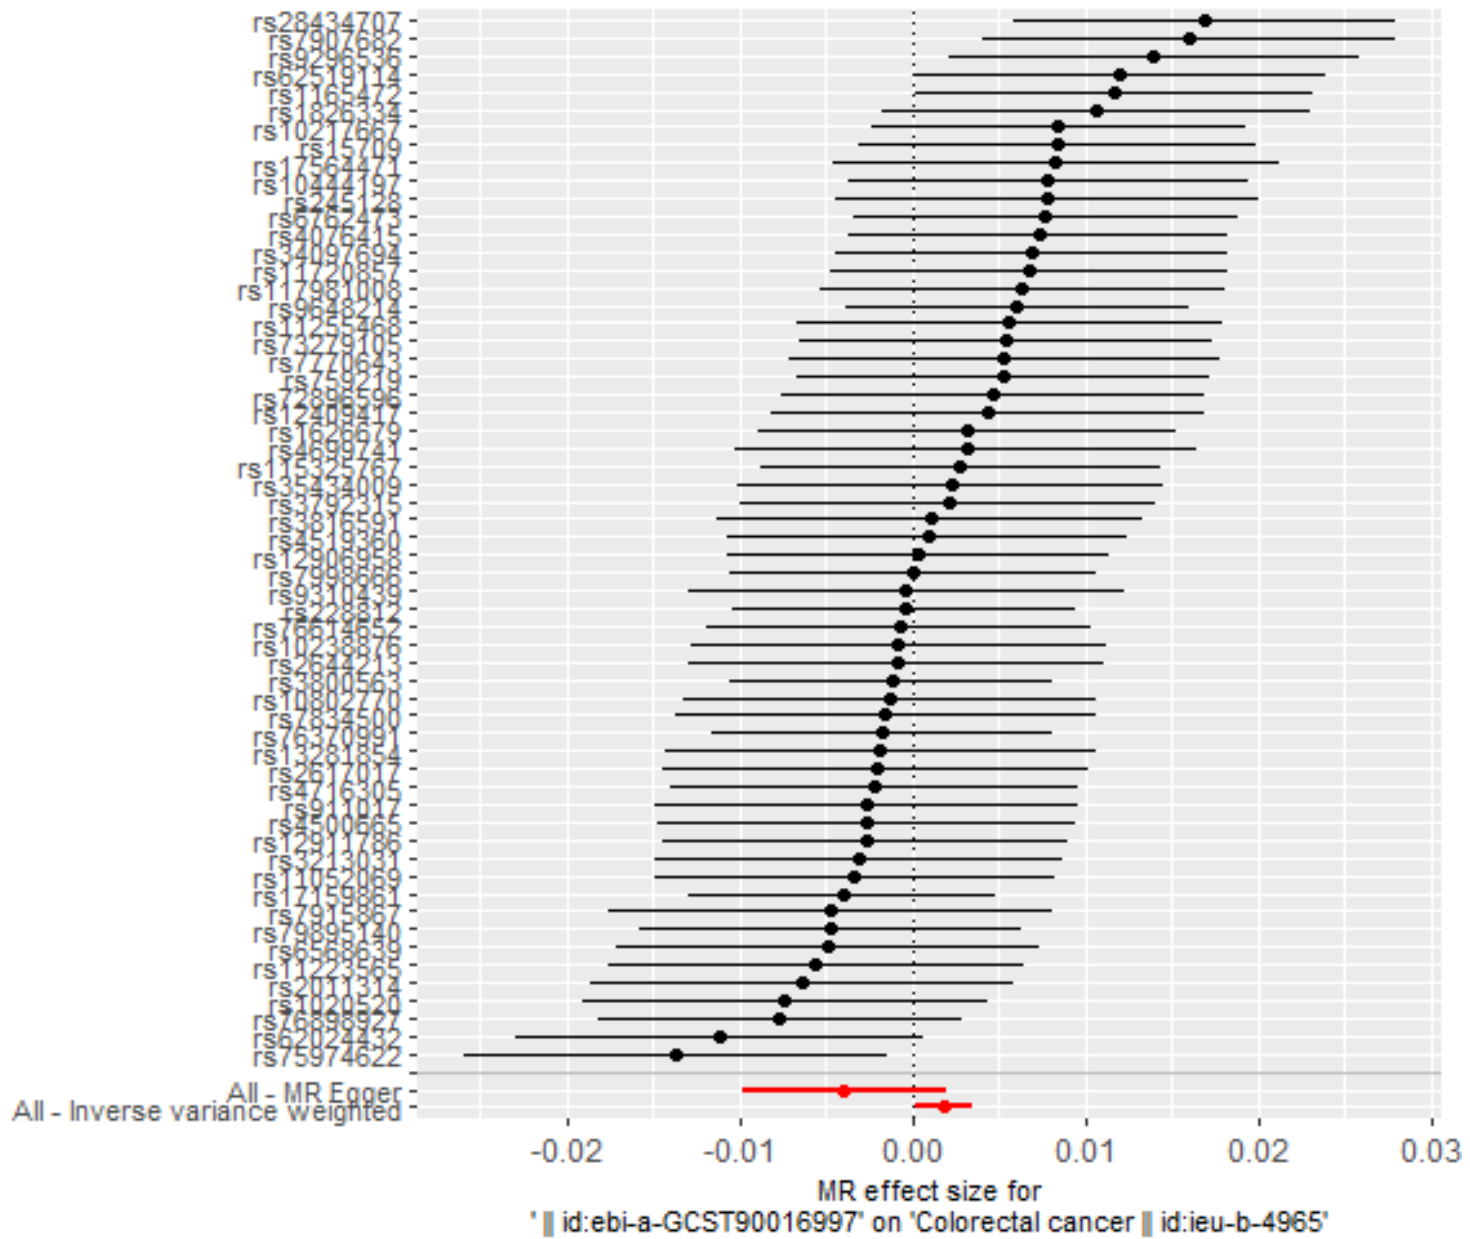

MR Test

- Inverse variance weighted
- MR Egger
- Simple mode
- Weighted median
- Weighted mode

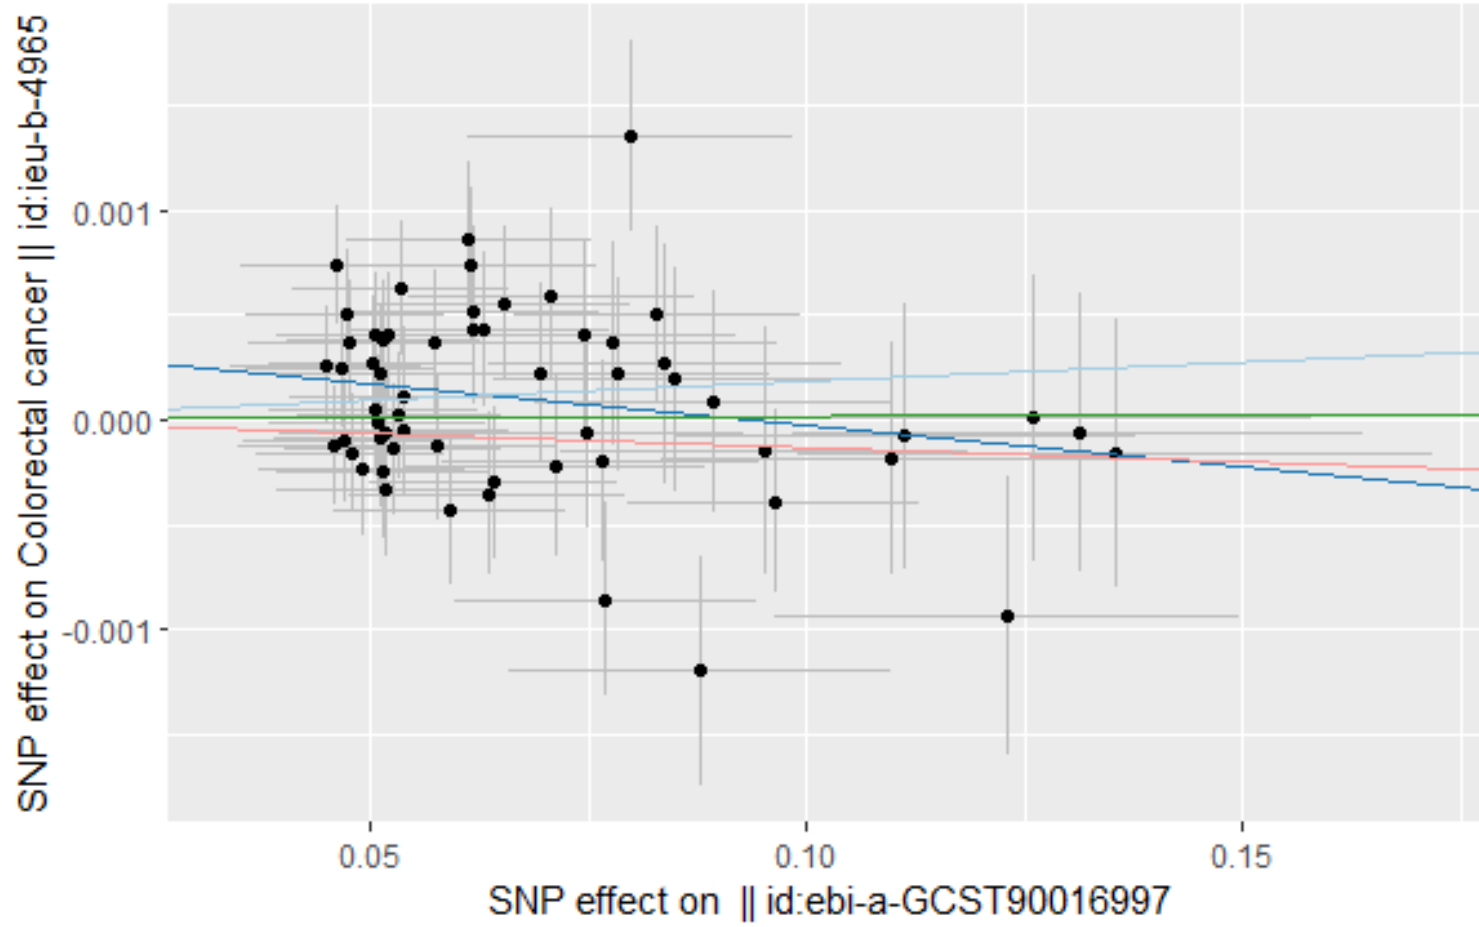

**Figure 136** Leave-one-out analysis, funnel plot, MR effect size and scatter plot for gut microbiota abundance (genus *Fusicatenibacter* id.11305) on colorectal cancer

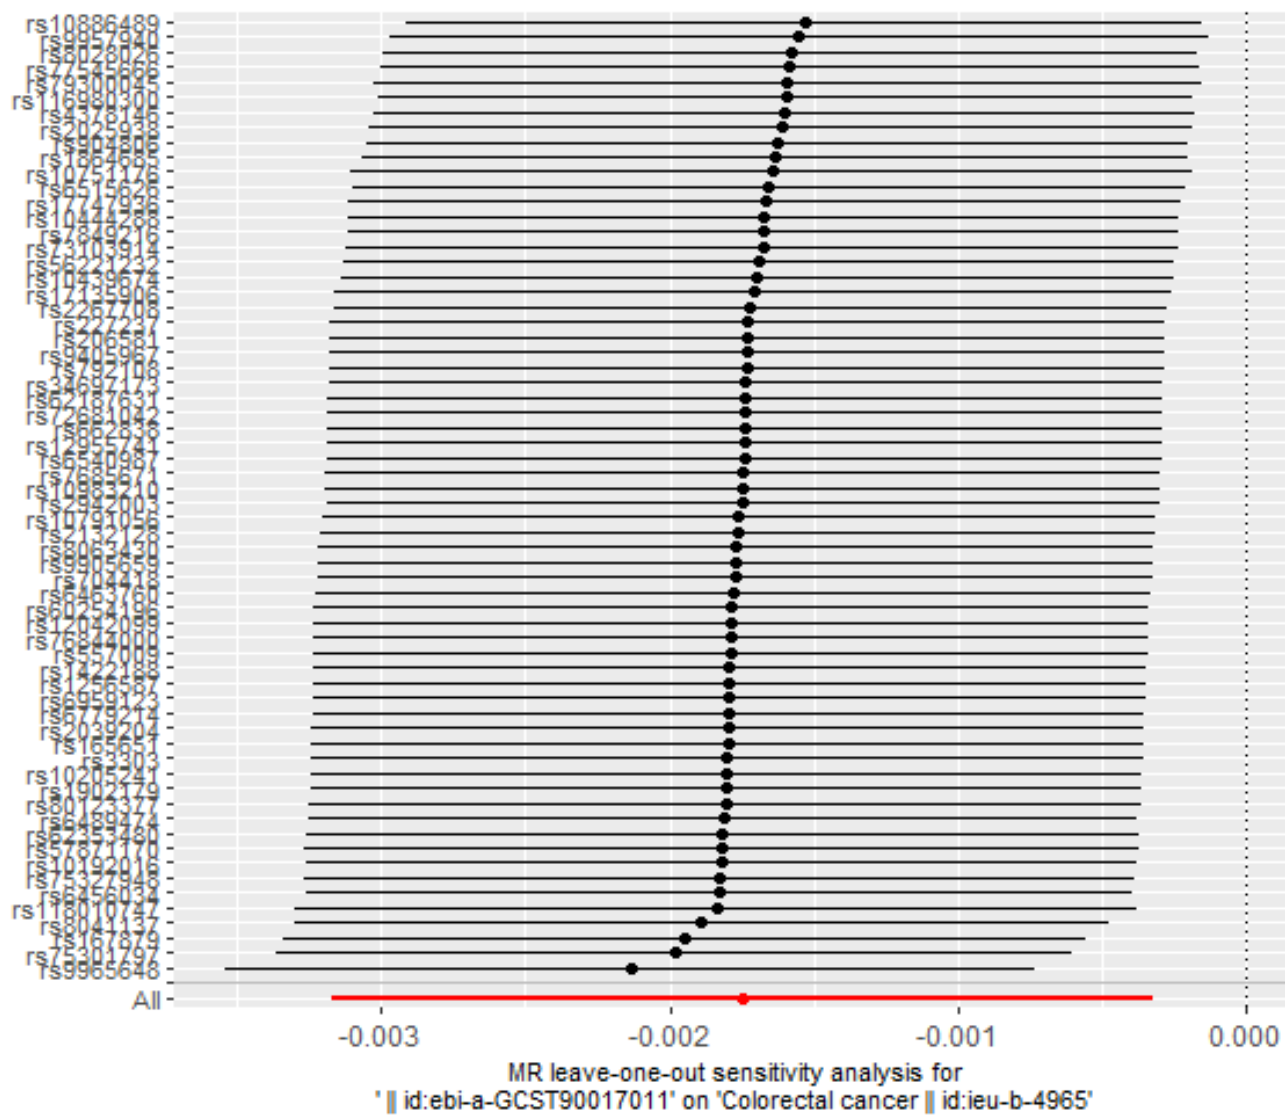

MR Method

- Inverse variance weighted
- MR Egger

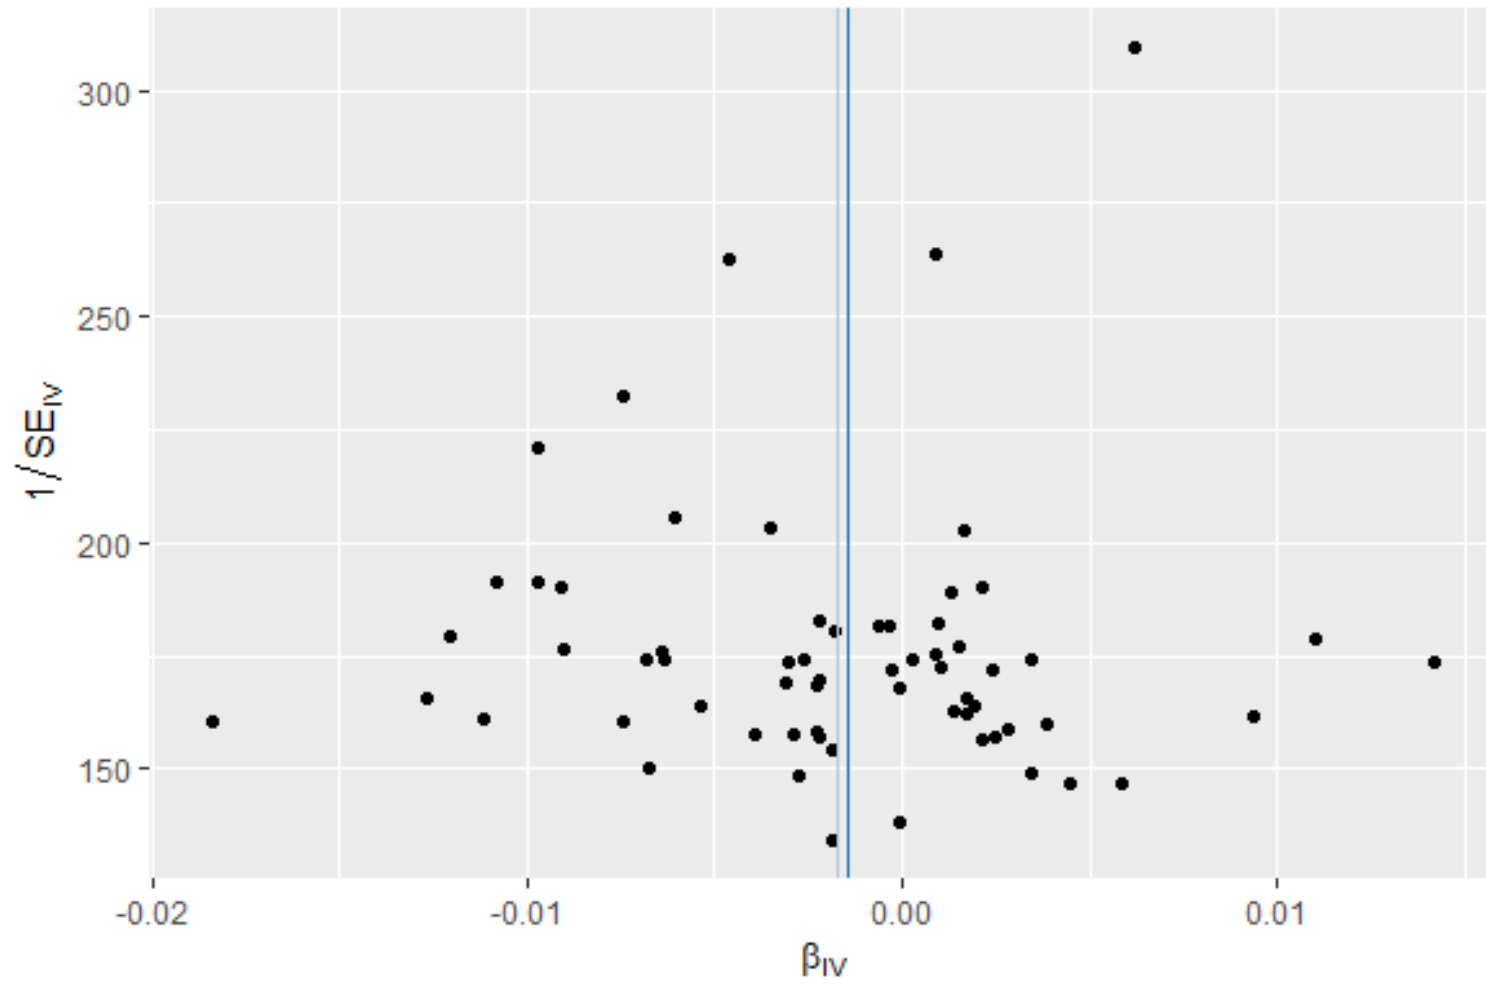



MR Test

- Inverse variance weighted
- MR Egger
- Simple mode
- Weighted median
- Weighted mode

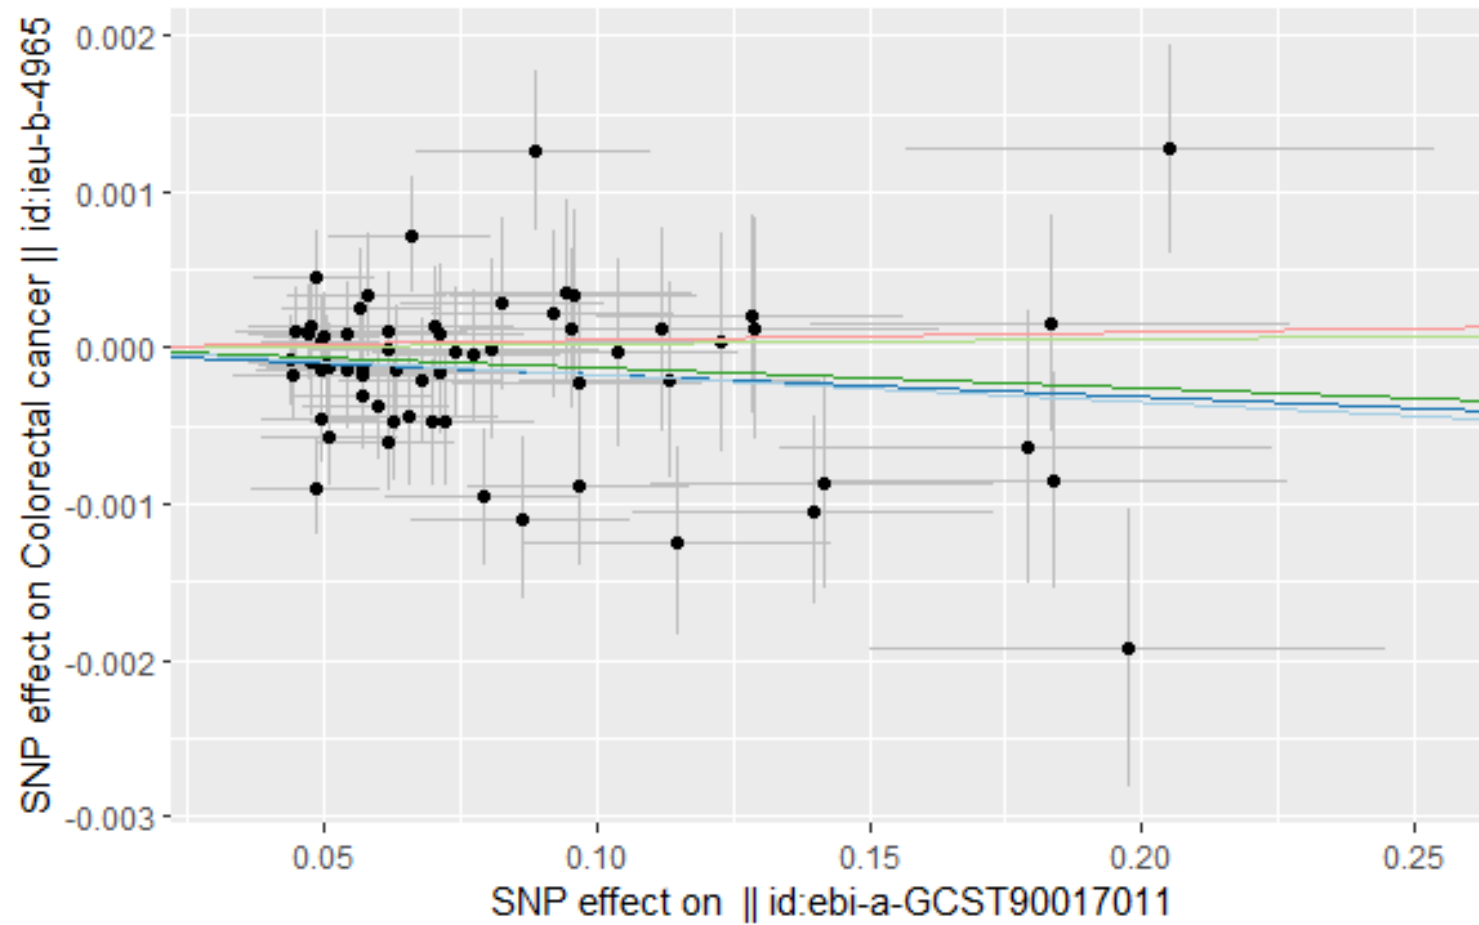



**Figure 137** Leave-one-out analysis, funnel plot, MR effect size and scatter plot for gut microbiota abundance (genus *Methanobrevibacter* id.123) on colorectal cancer

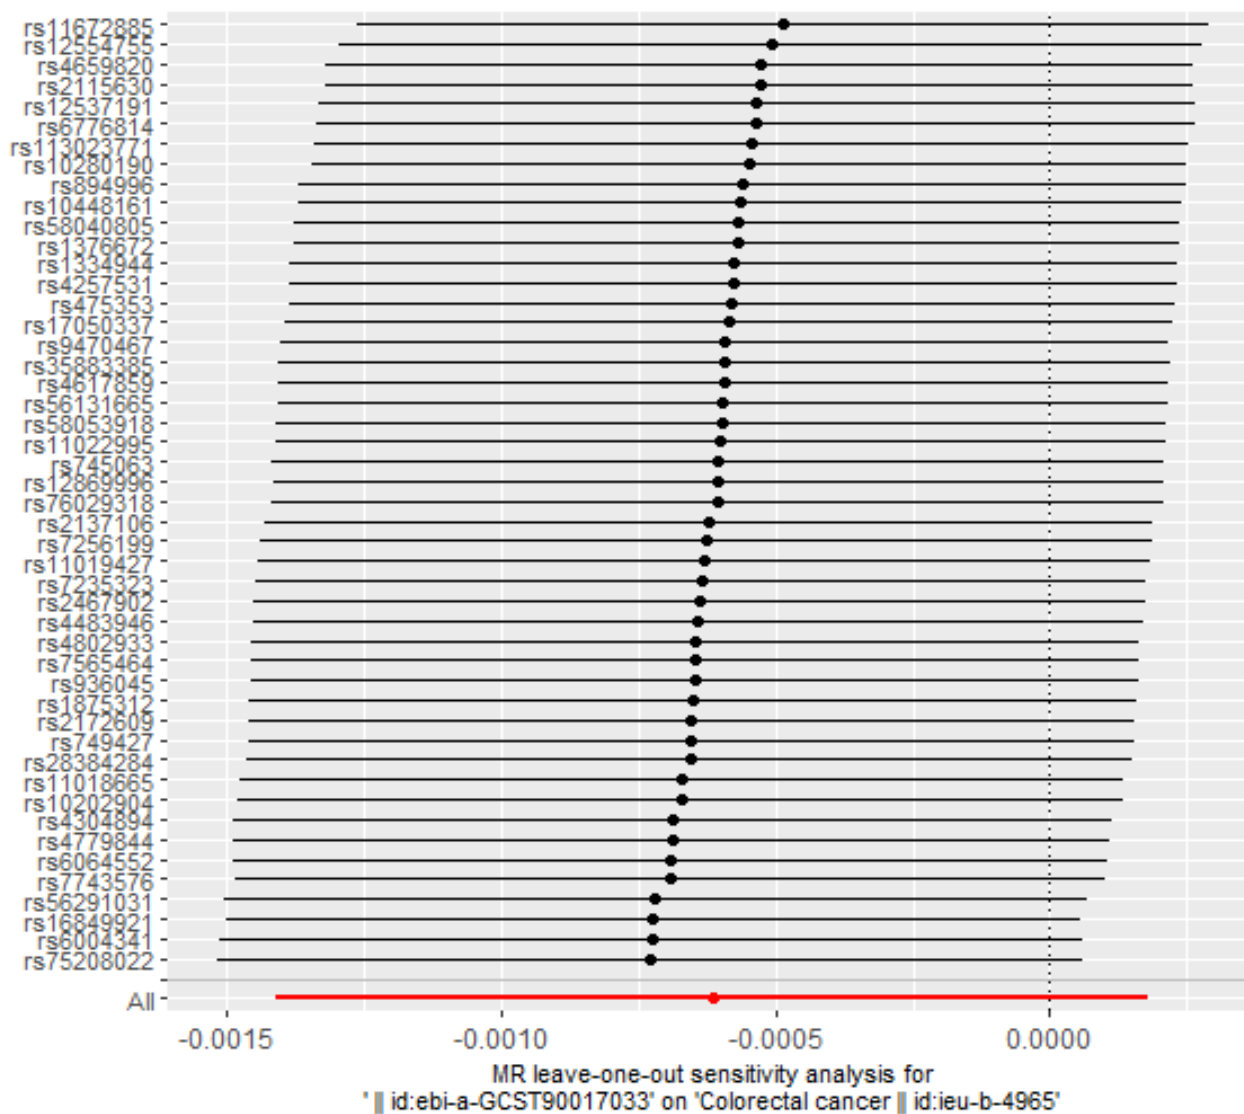

MR Method

- Inverse variance weighted
- MR Egger

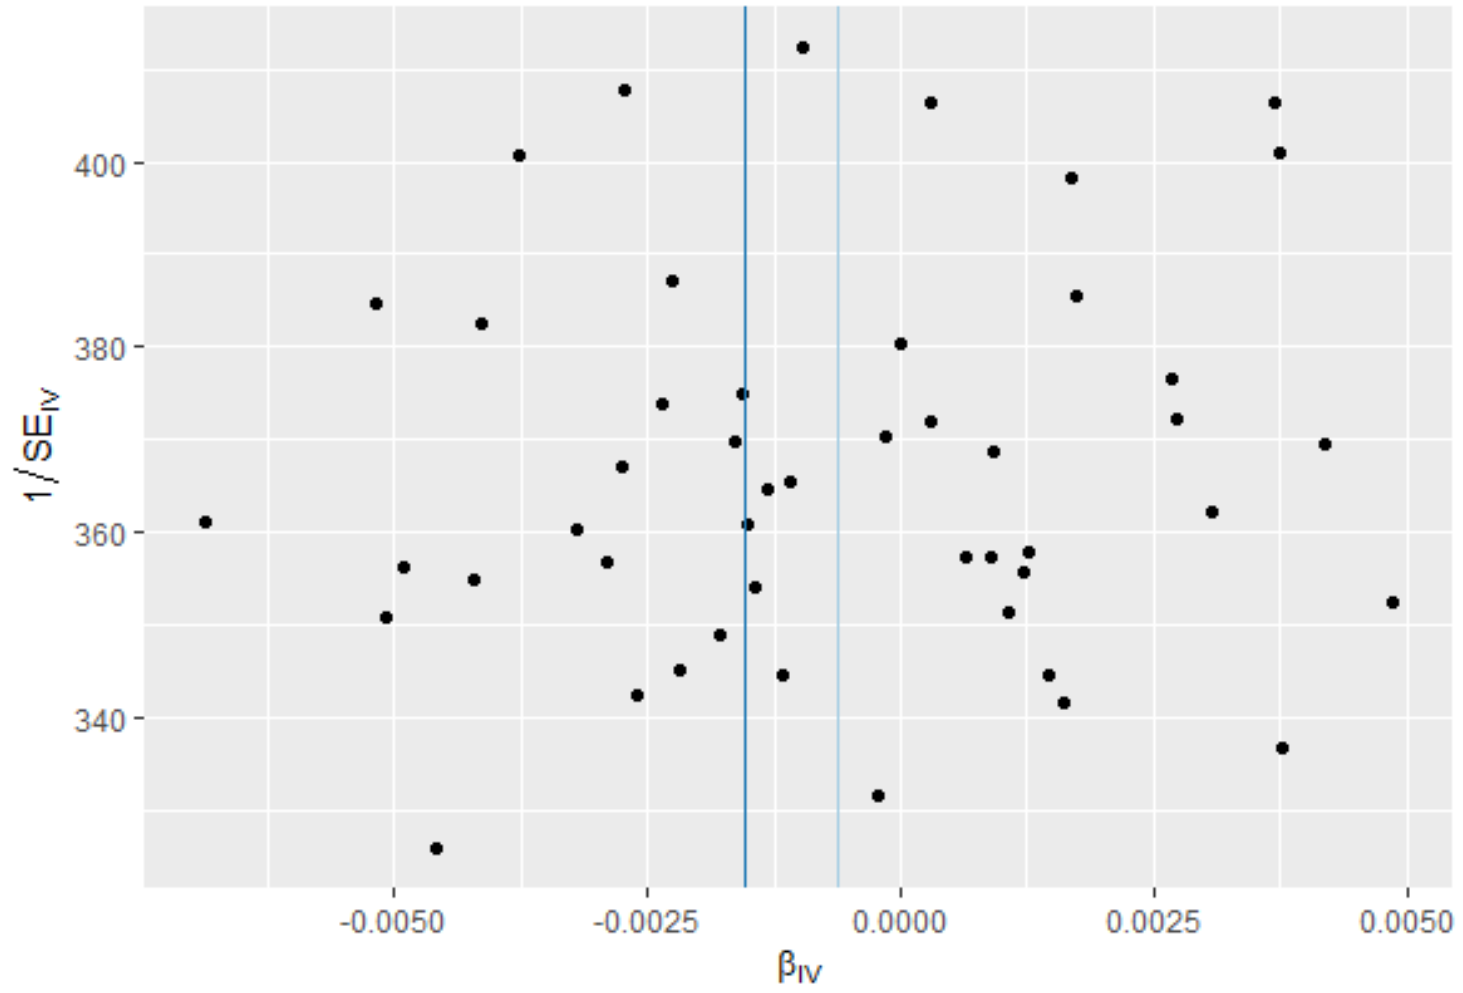

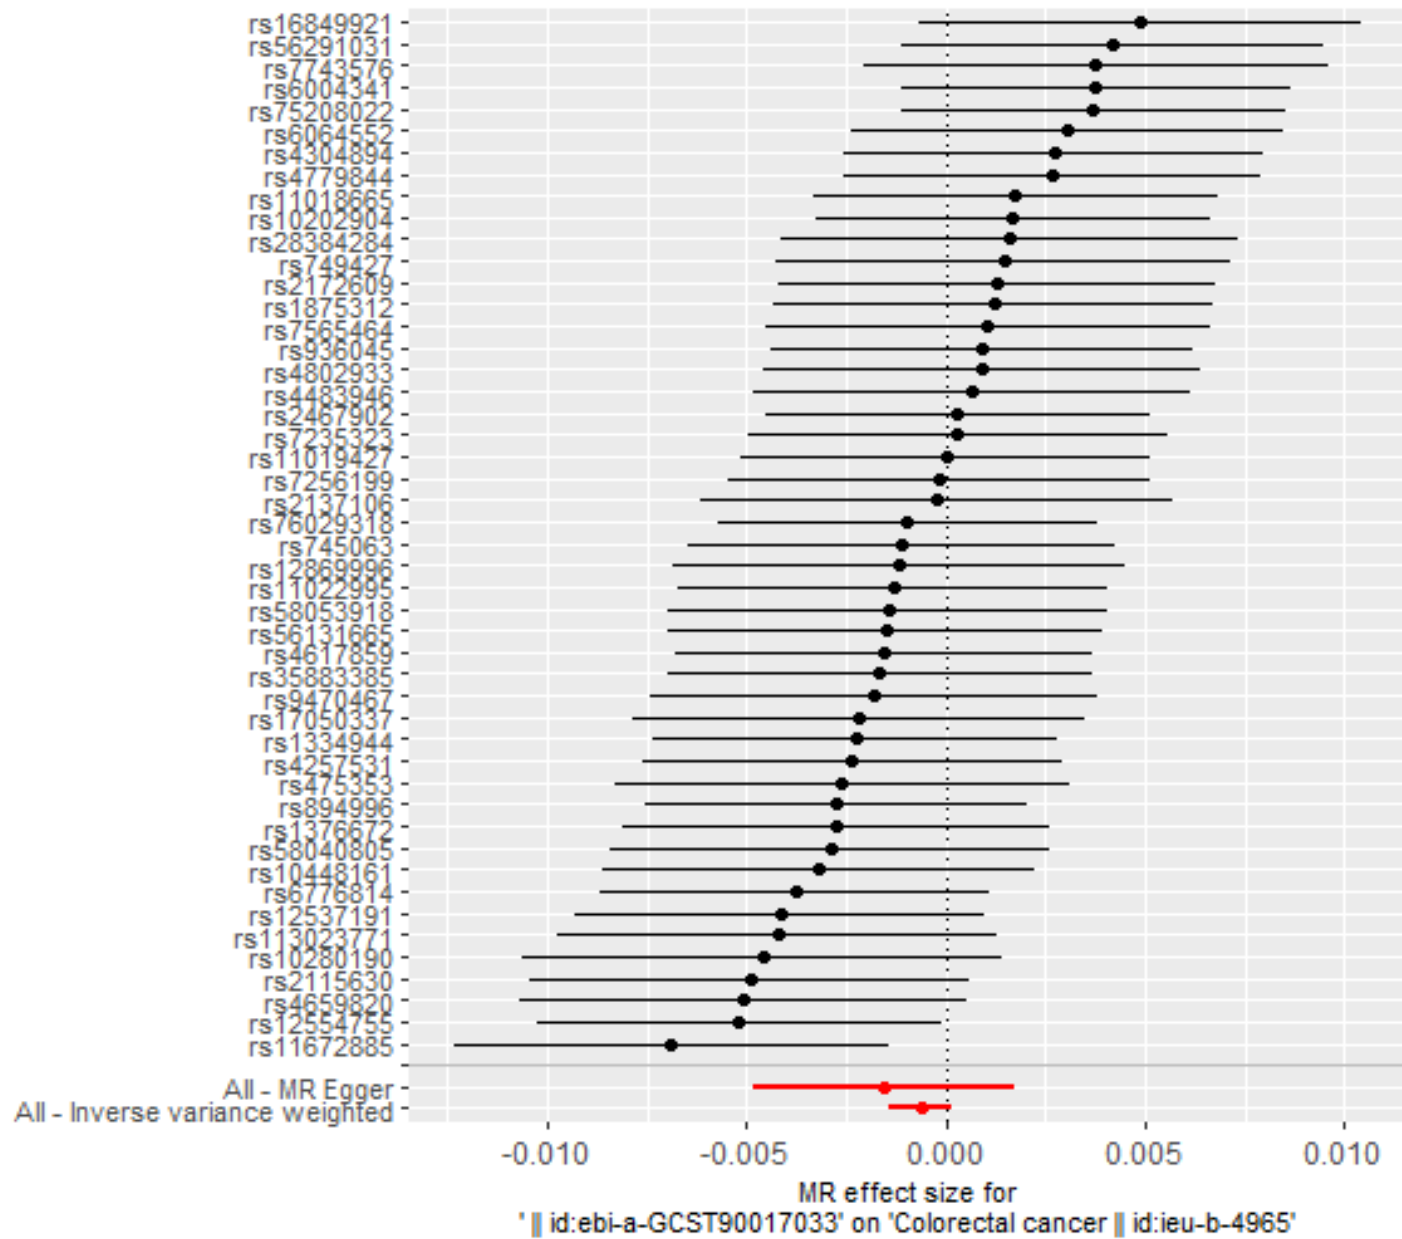

### MR Test

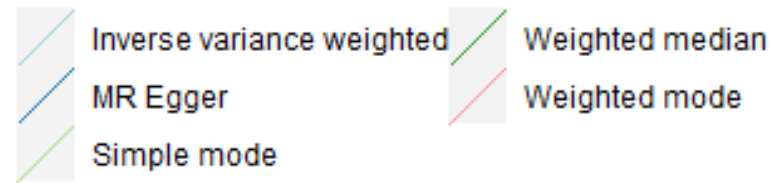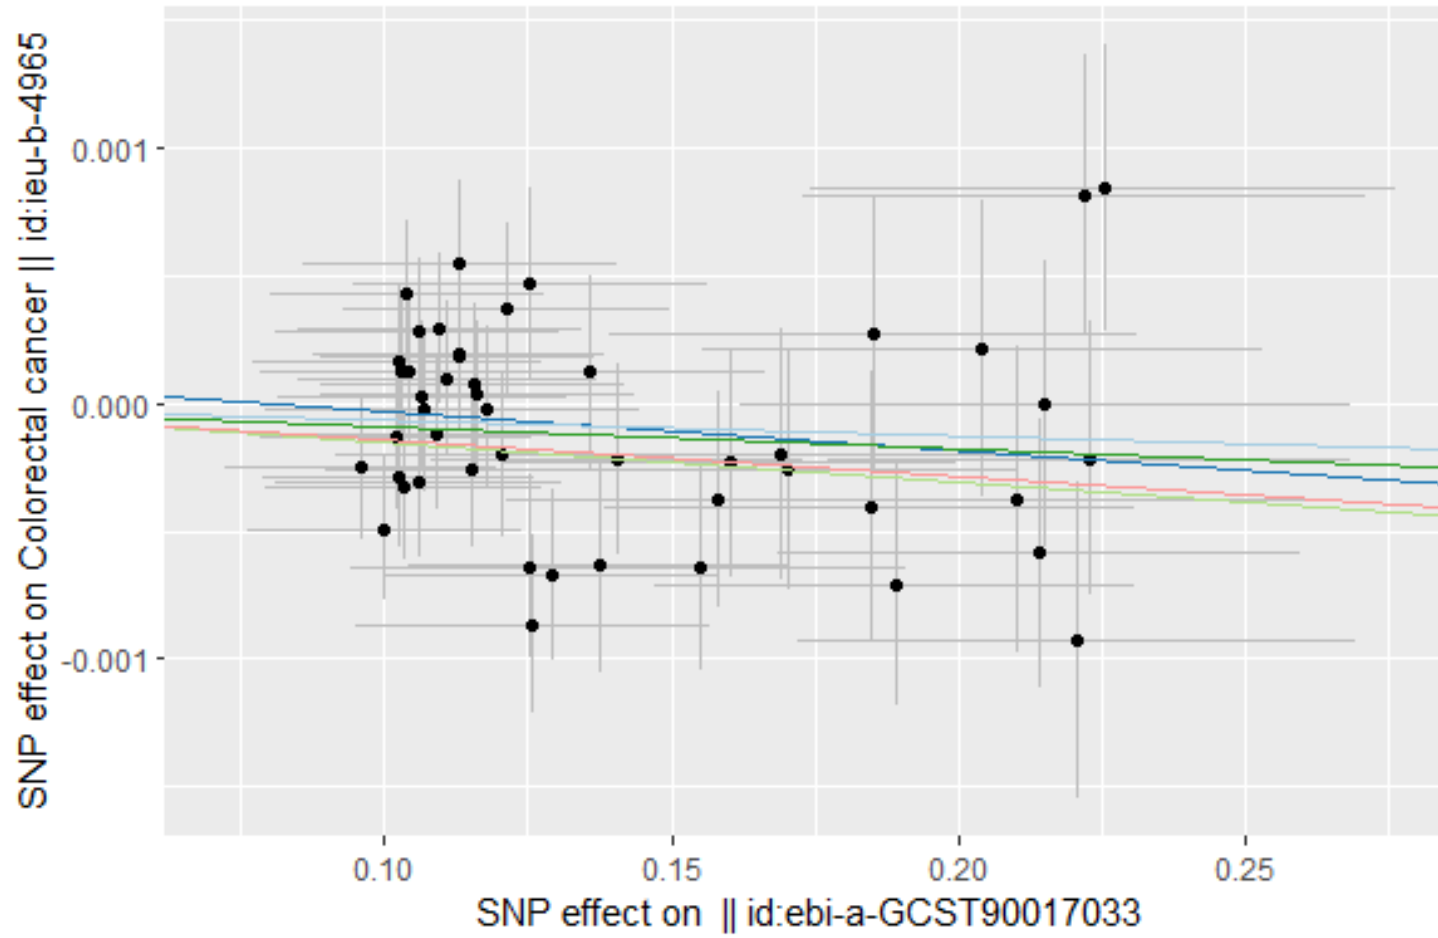

**Figure 138** Leave-one-out analysis, funnel plot, MR effect size and scatter plot for gut microbiota abundance (genus Ruminococcaceae UCG002 id.11360) on colorectal cancer

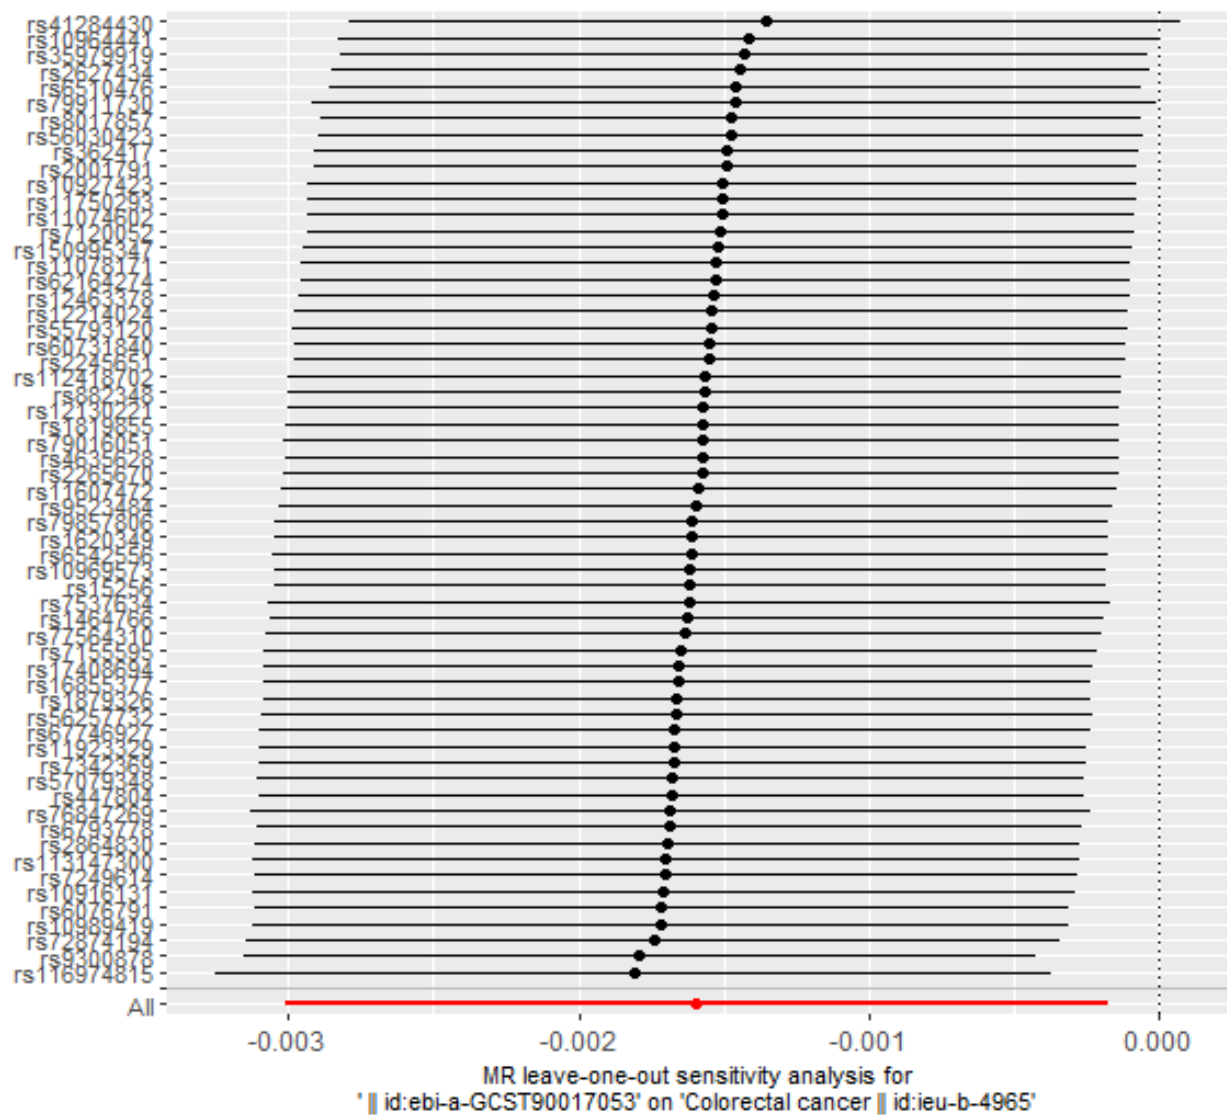

### MR Method

- Inverse variance weighted
- MR Egger

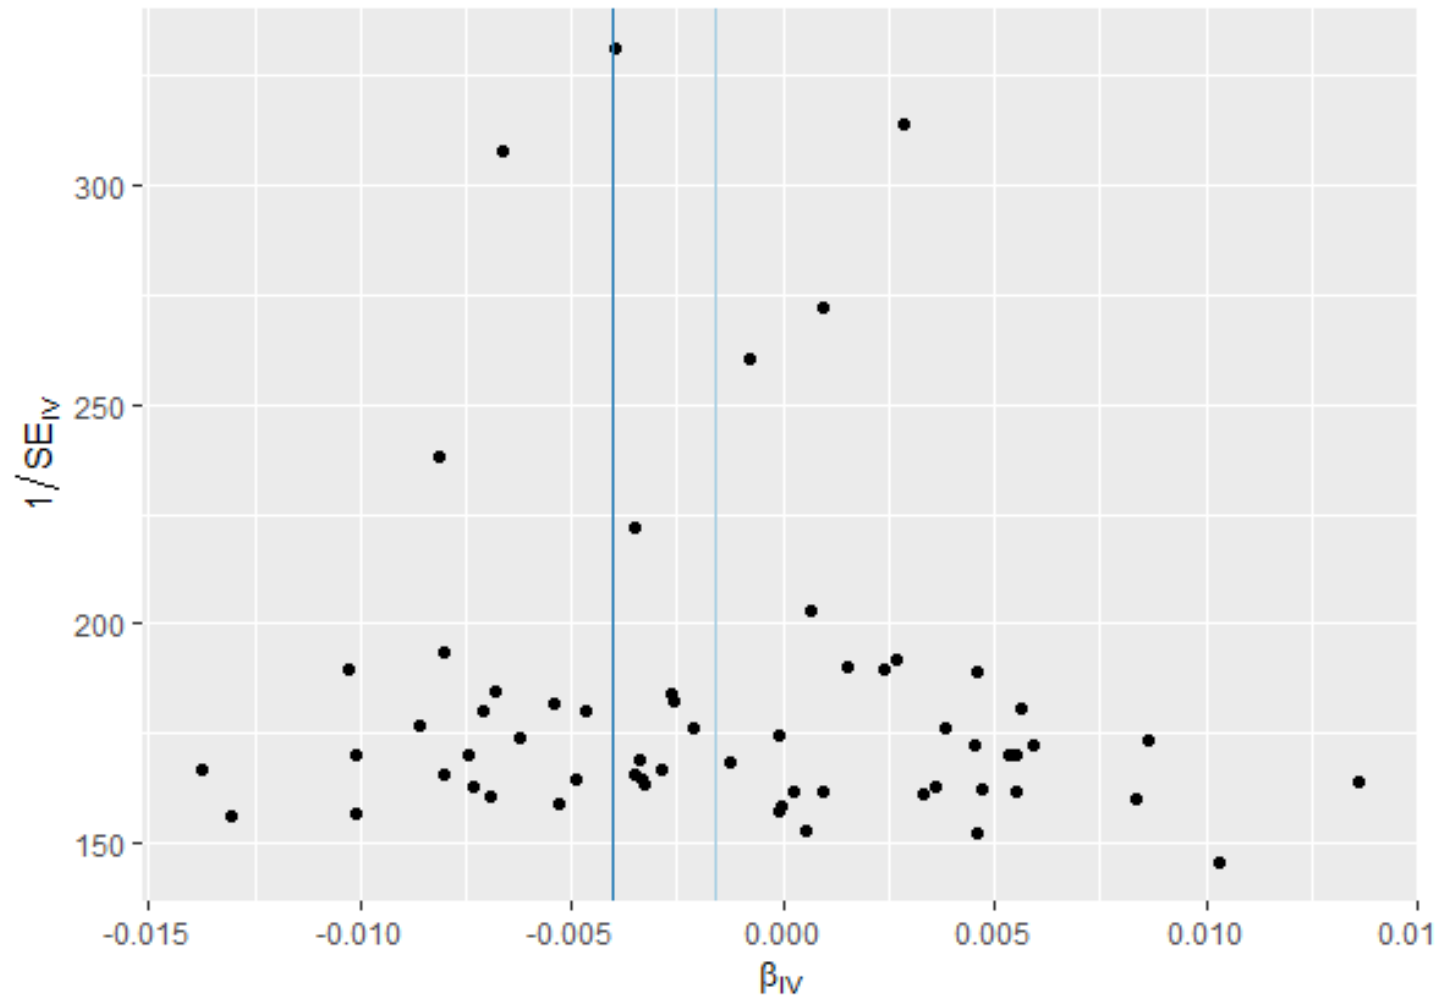



### MR Test

- Inverse variance weighted
- MR Egger
- Simple mode
- Weighted median
- Weighted mode

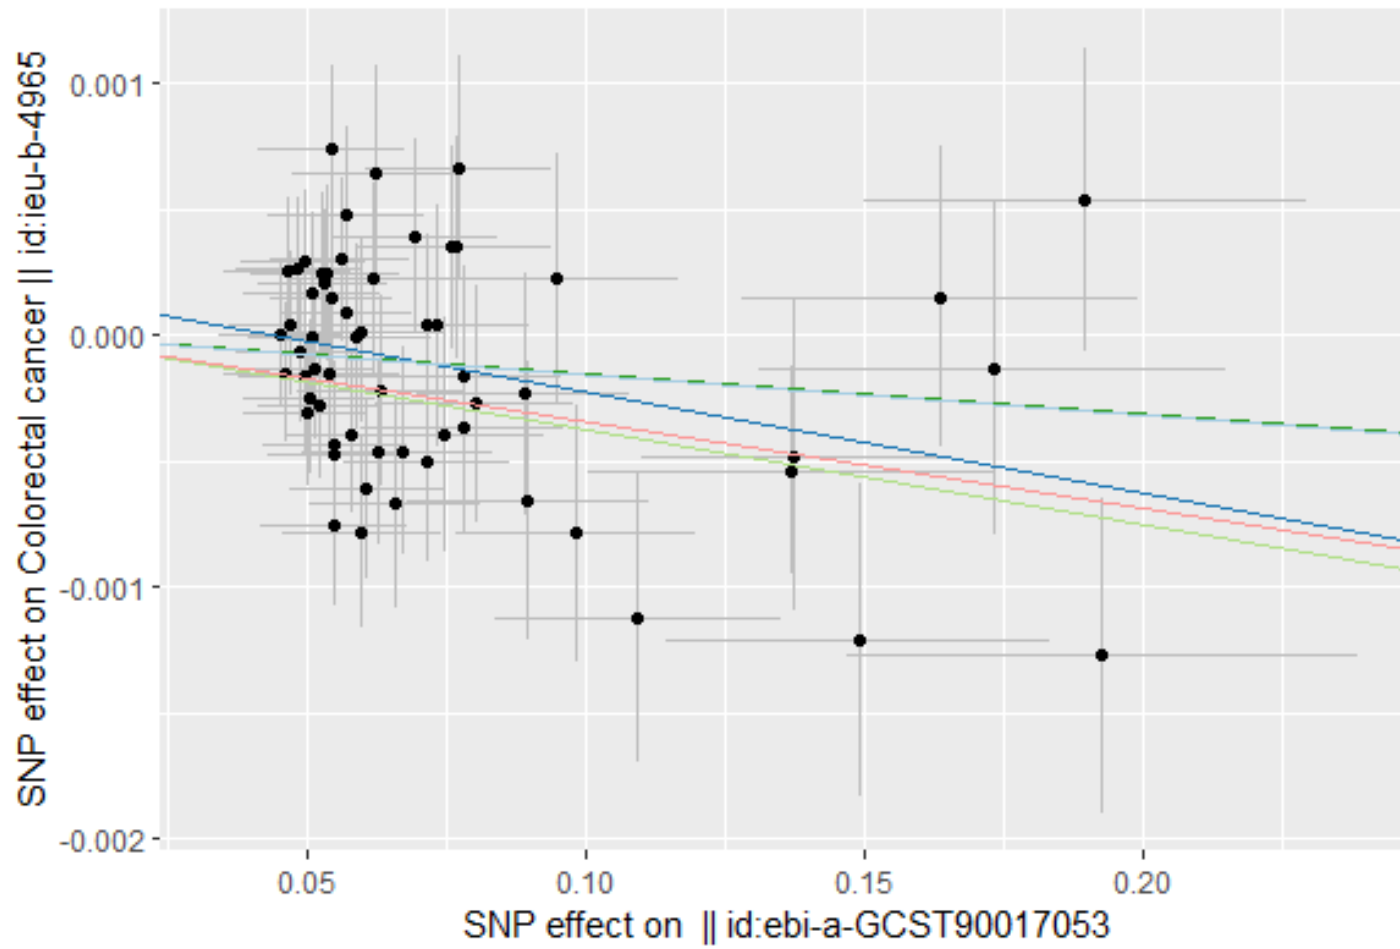



**Figure 139** Leave-one-out analysis, funnel plot, MR effect size and scatter plot for gut microbiota abundance (order Enterobacteriales id.3468) on colorectal cancer

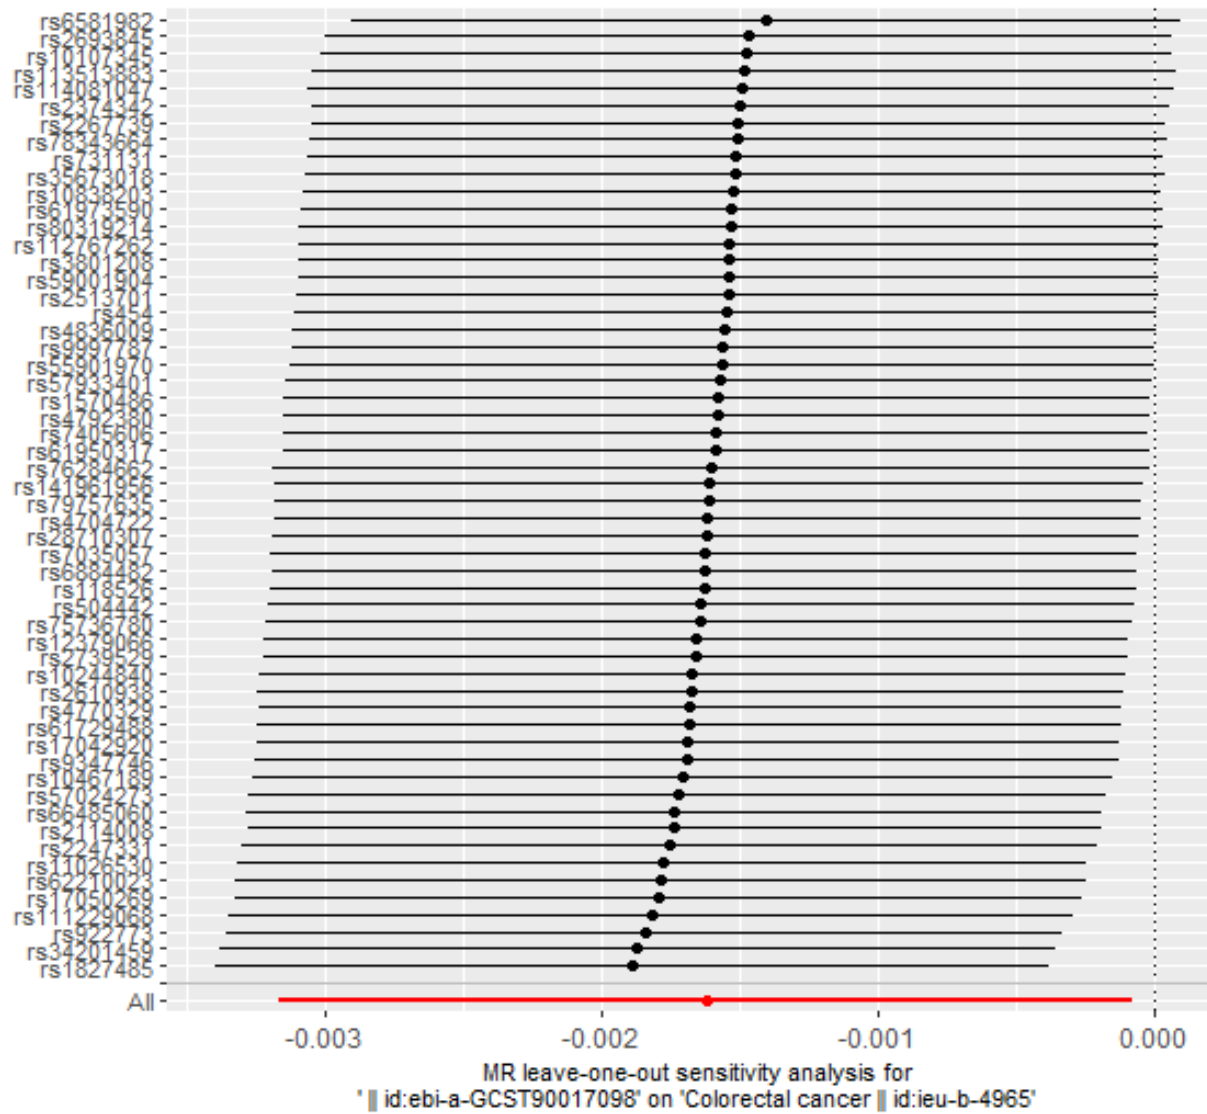



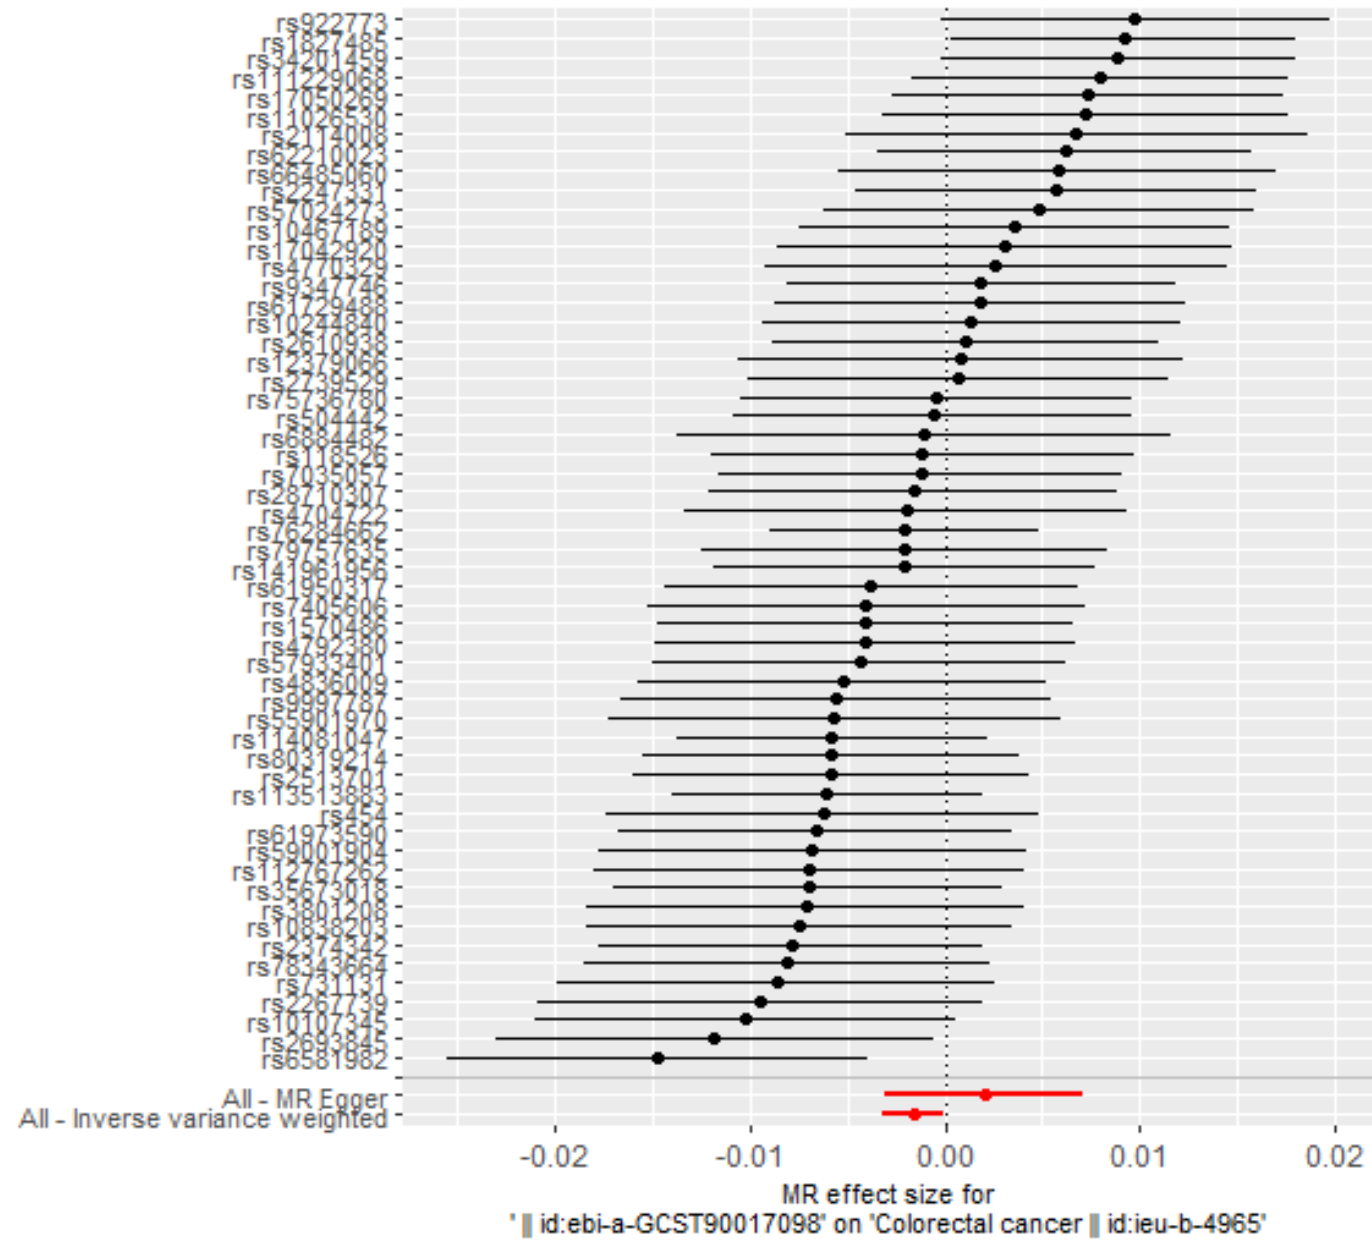

MR Test

- Inverse variance weighted
- MR Egger
- Simple mode
- Weighted median
- Weighted mode

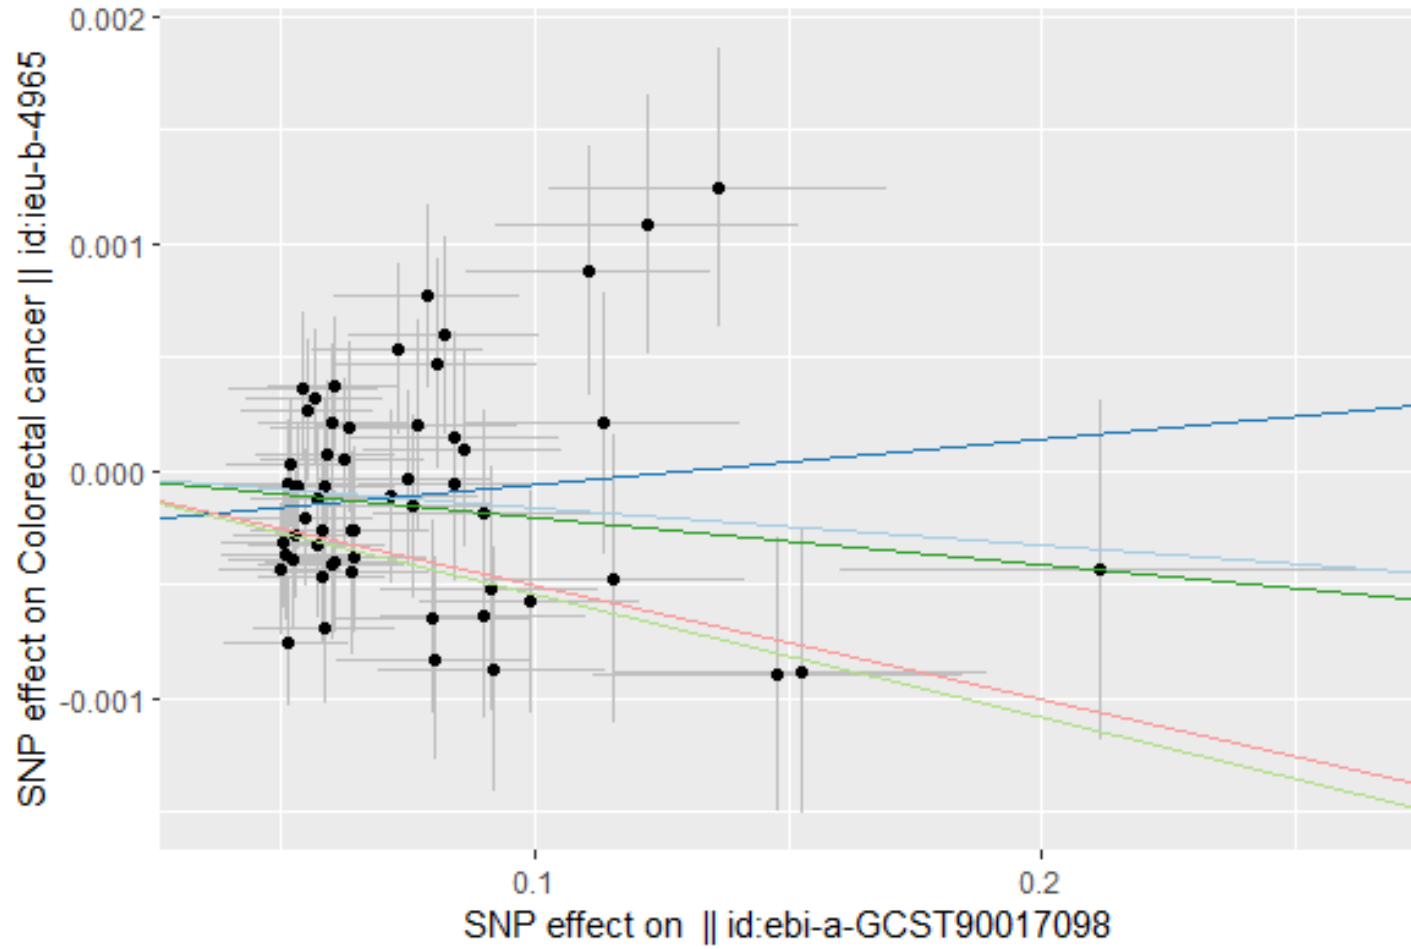

**Figure 140** Leave-one-out analysis, funnel plot, MR effect size and scatter plot for gut microbiota abundance (phylum Proteobacteria id.2375) on colorectal cancer

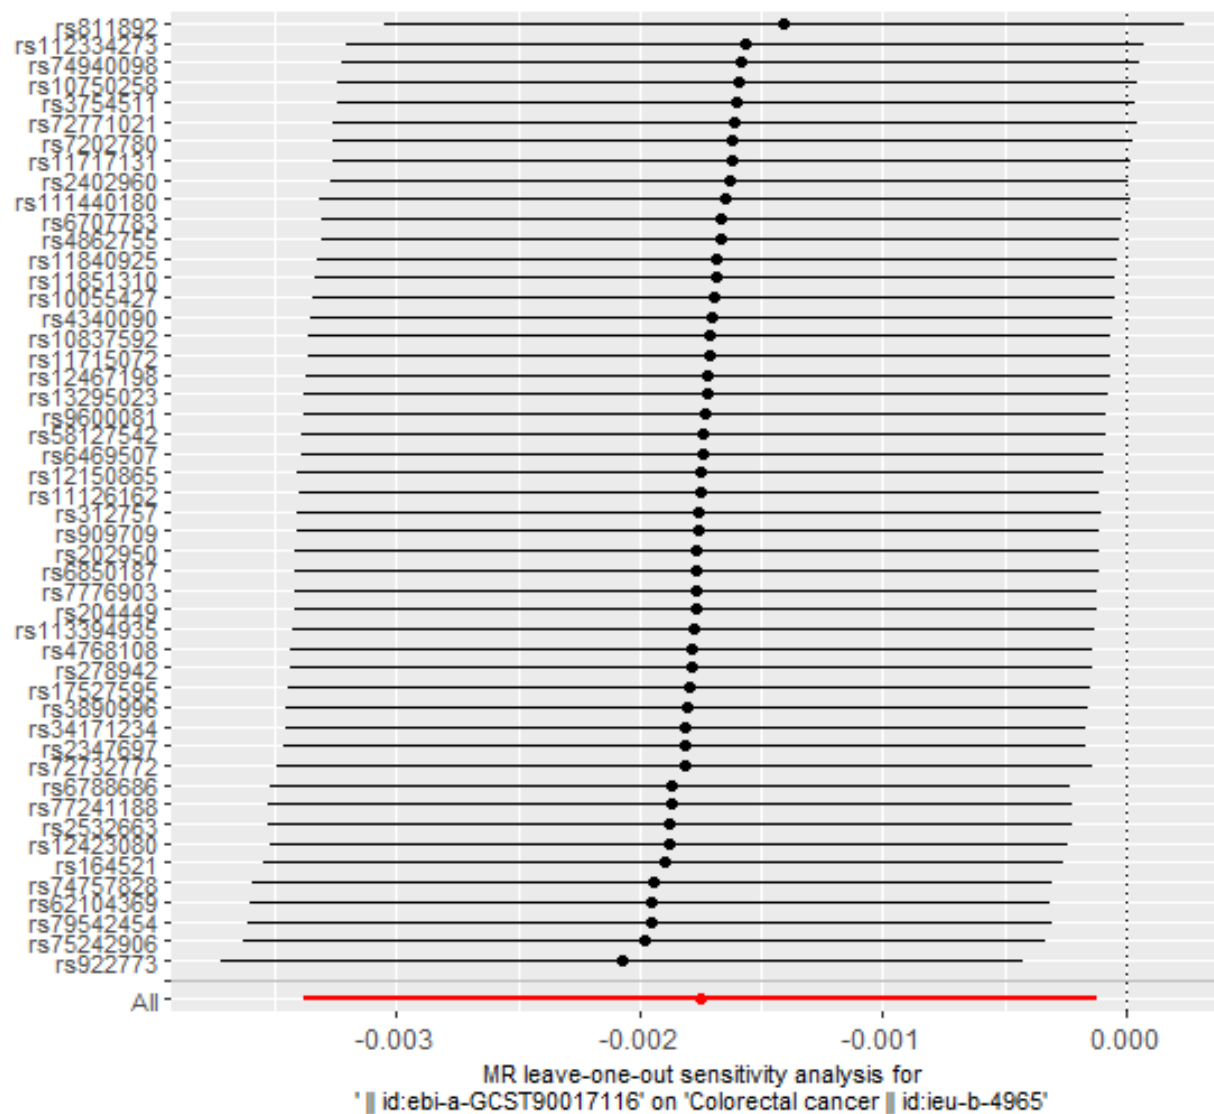

MR Method

- Inverse variance weighted
- MR Egger

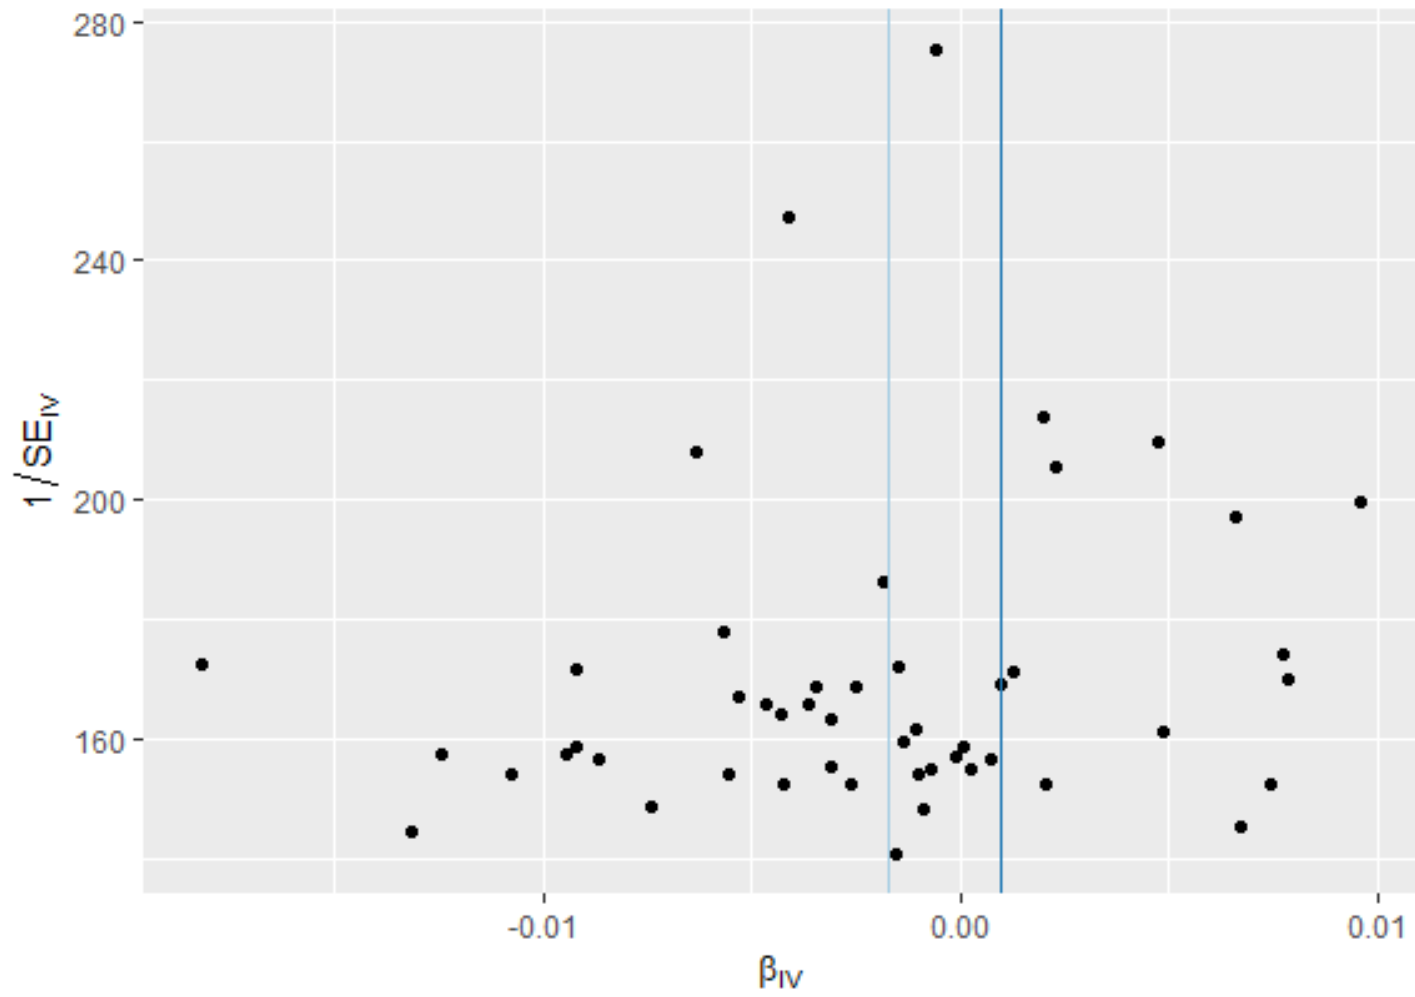

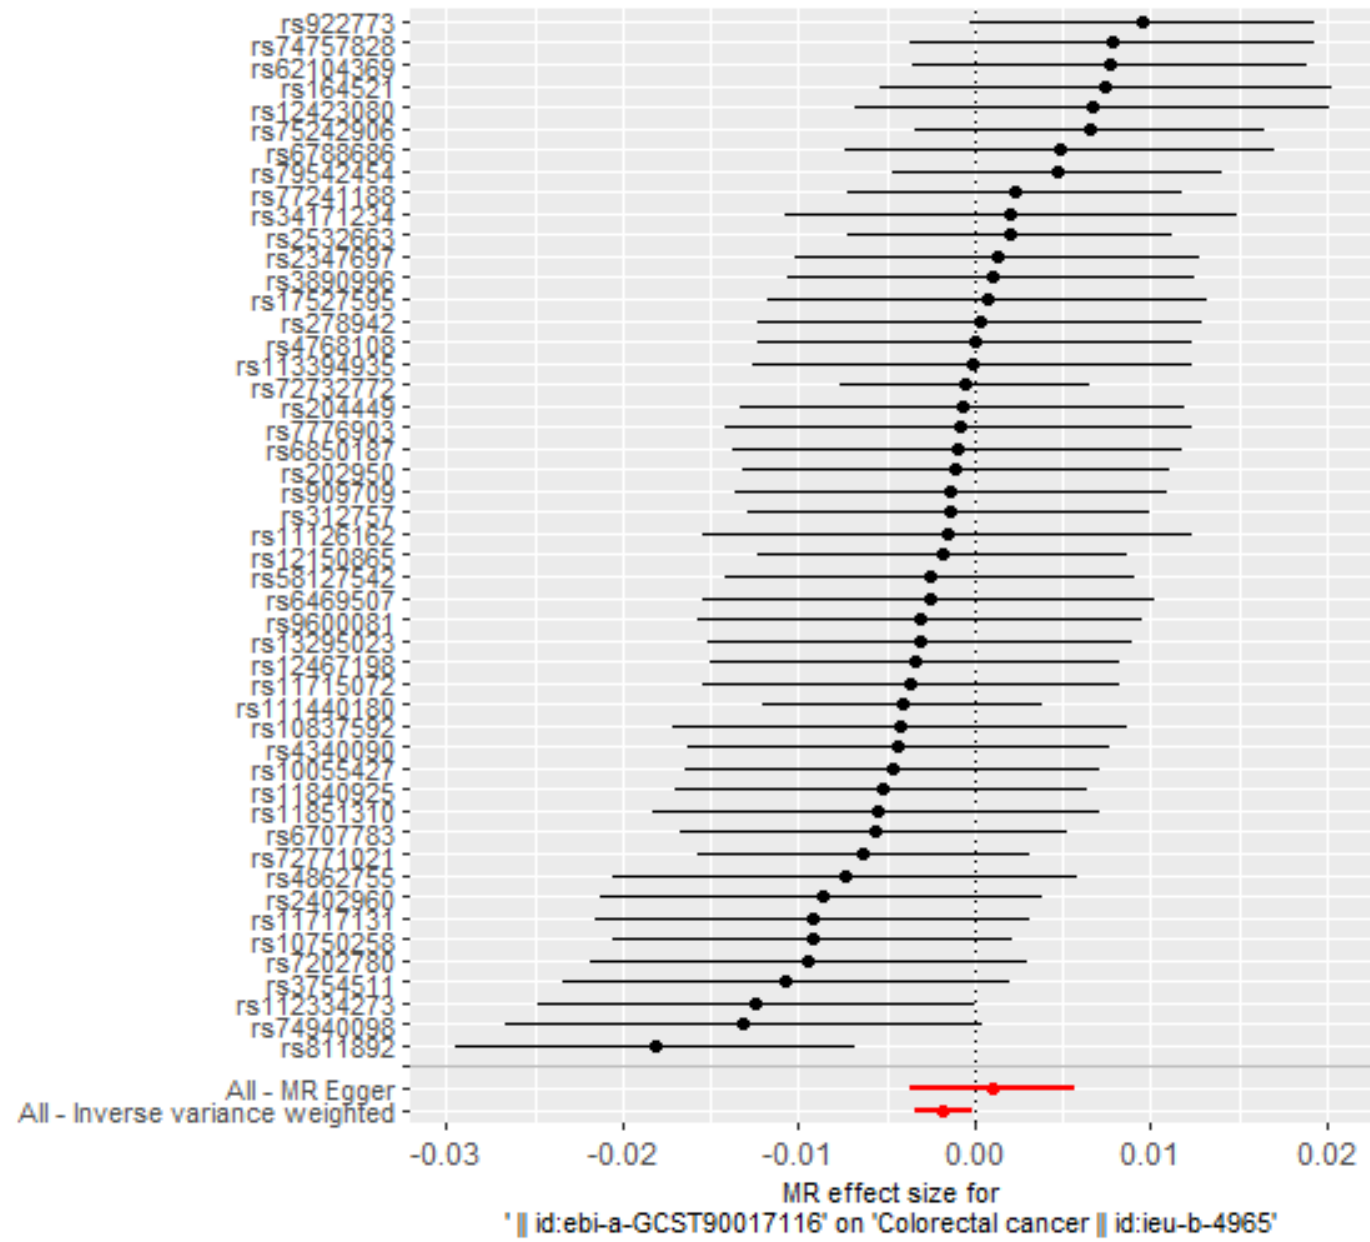

### MR Test

- Inverse variance weighted
- MR Egger
- Simple mode
- Weighted median
- Weighted mode

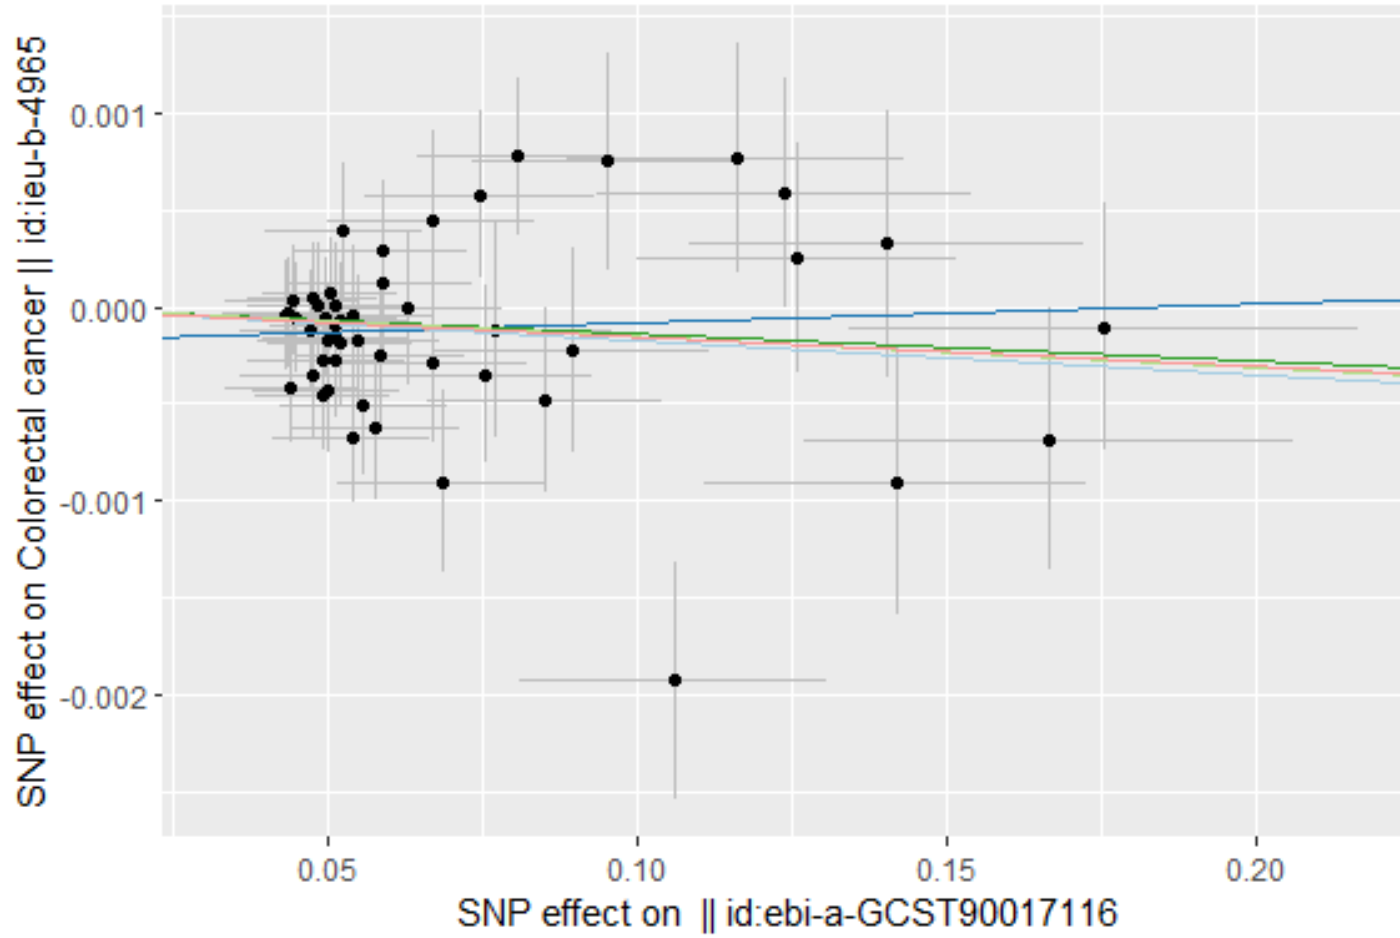



**Figure 141** Leave-one-out analysis, funnel plot, MR effect size and scatter plot for gut microbiota abundance (class Actinobacteria id.419) on coeliac disease

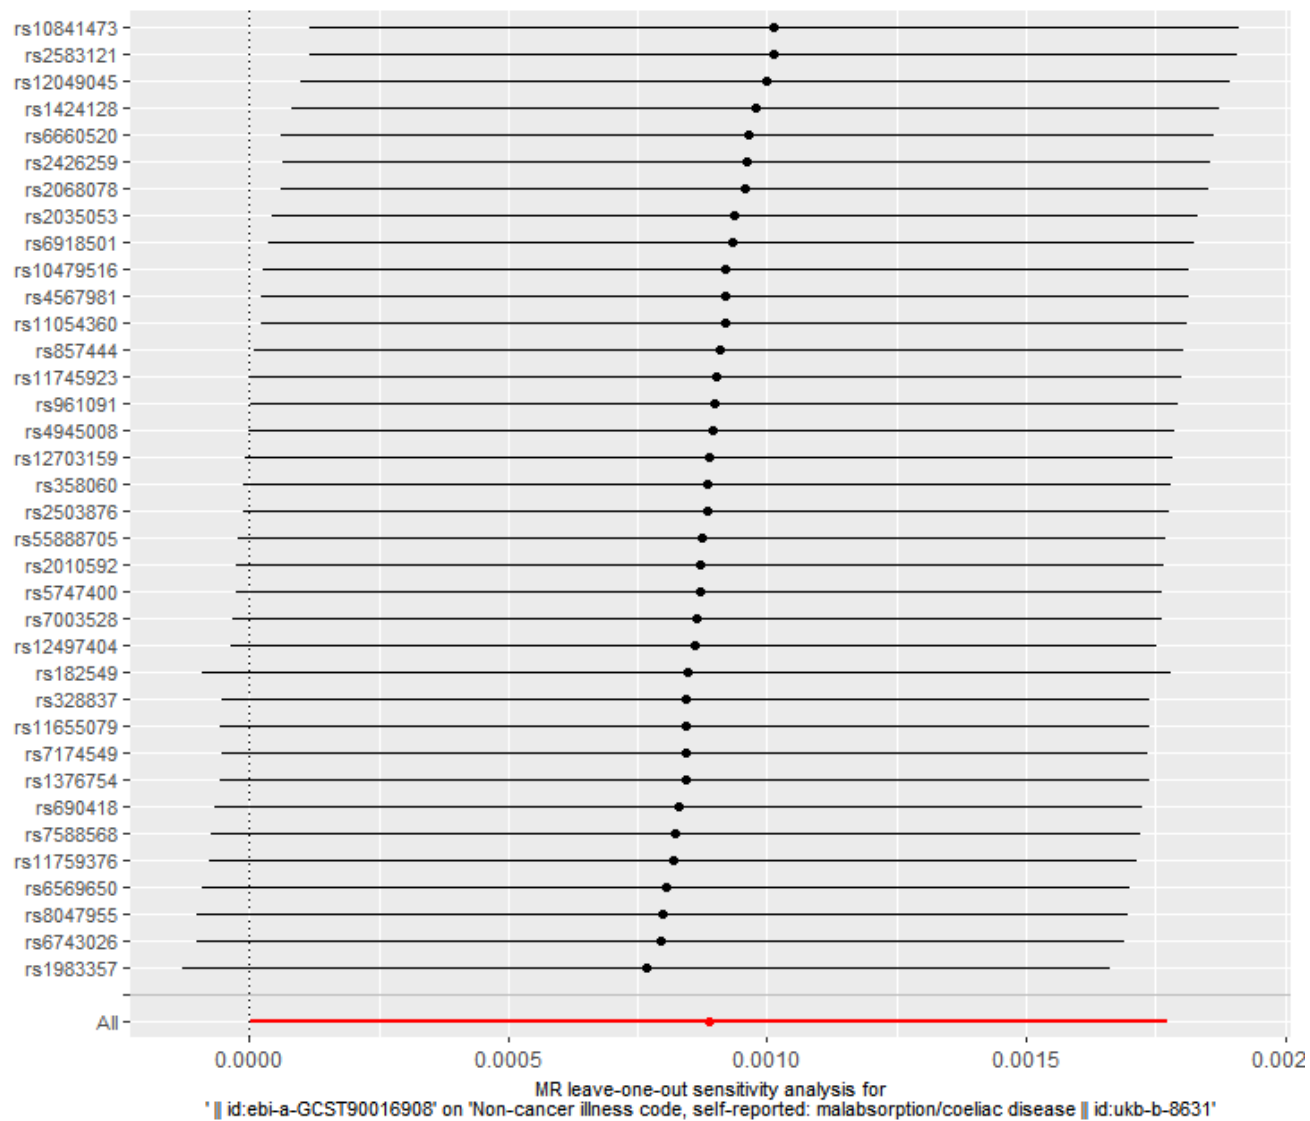

MR Method

- Inverse variance weighted
- MR Egger

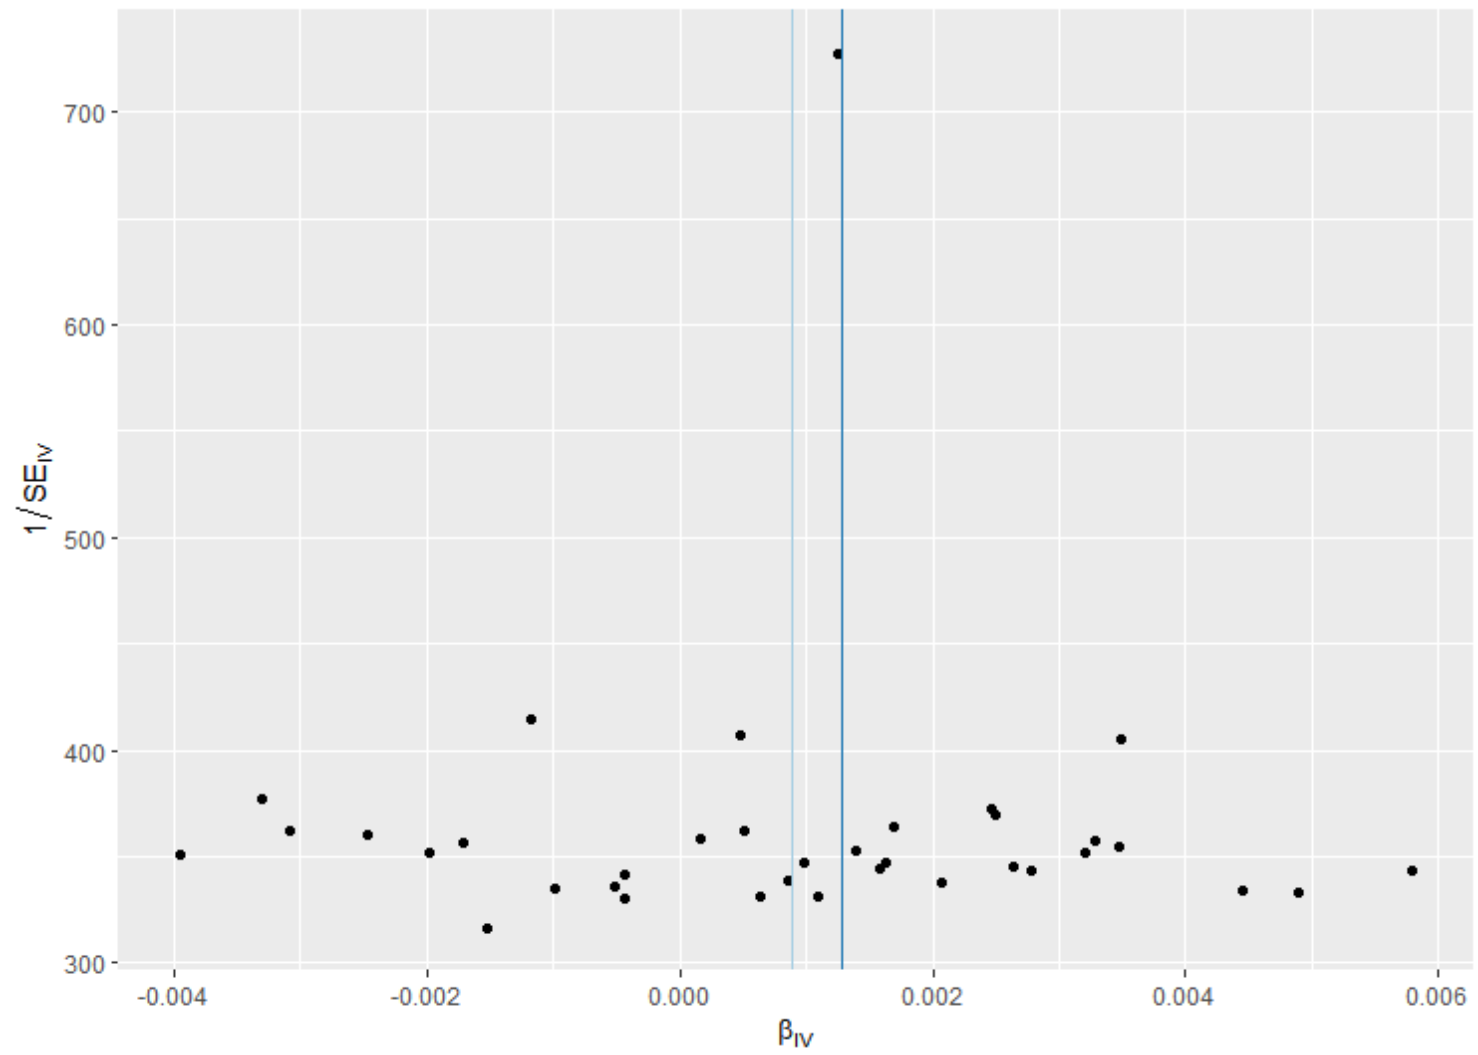

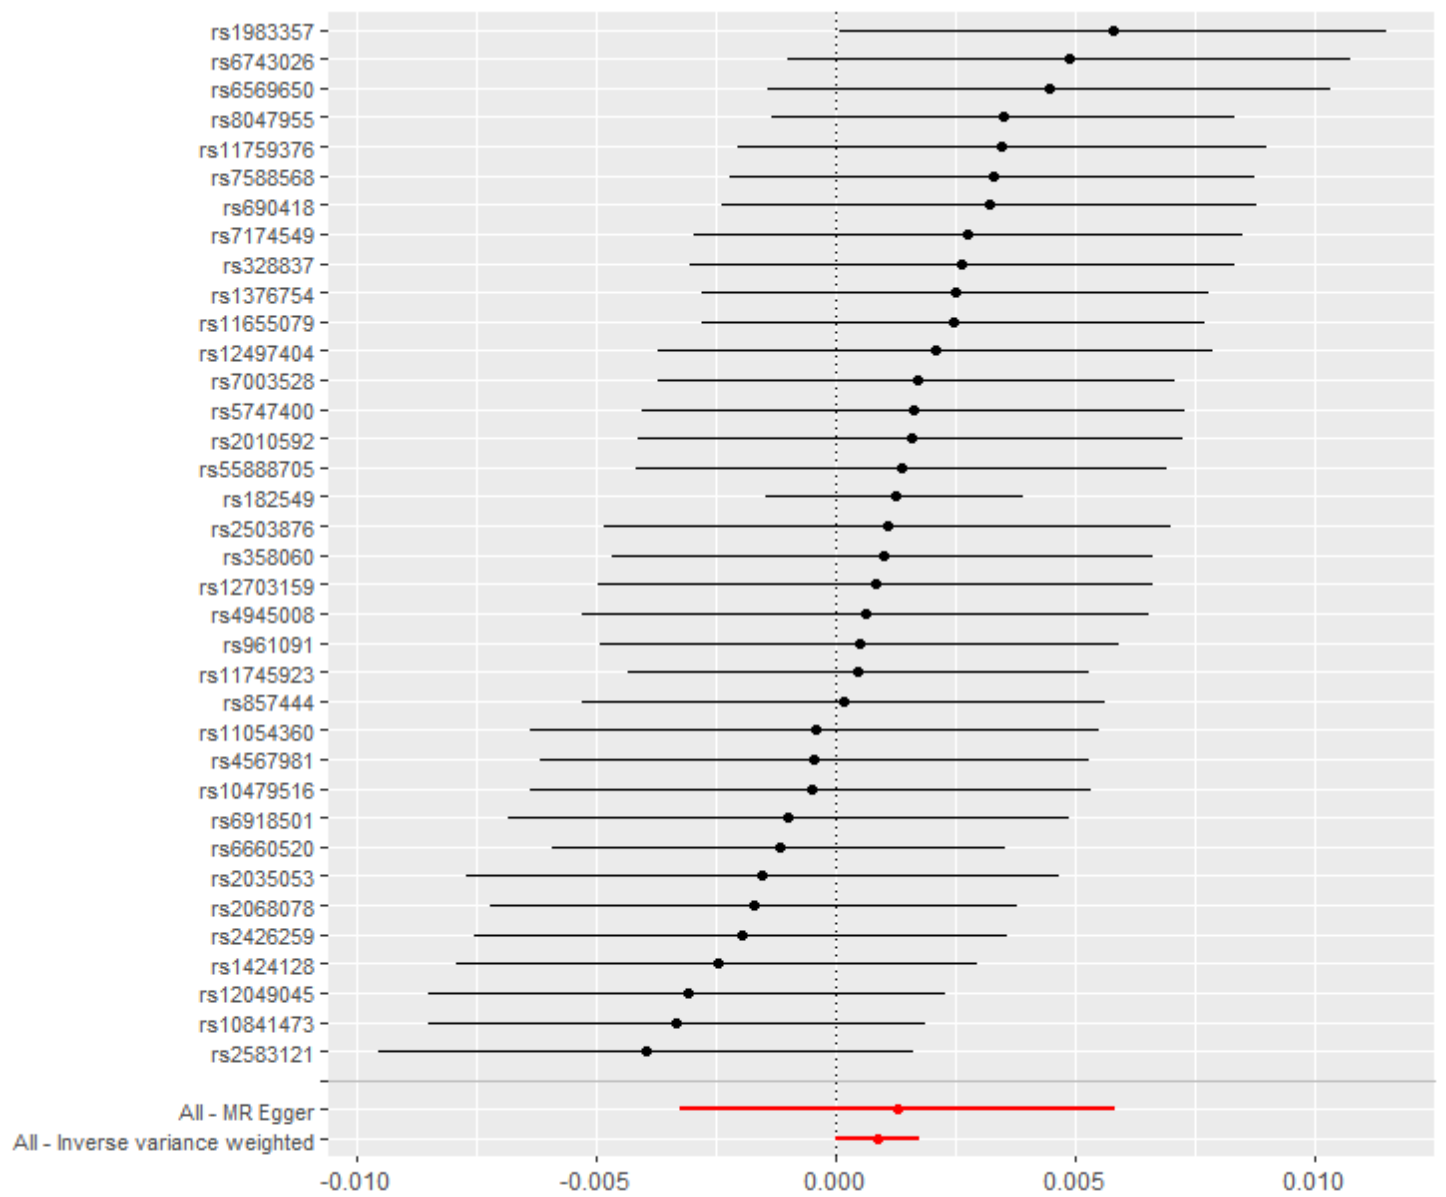

Effect on Non-cancer illness code, self-reported: malabsorption/coeliac disease || id:ukb-b-8631

### MR Test

- Inverse variance weighted
- MR Egger
- Simple mode
- Weighted median
- Weighted mode

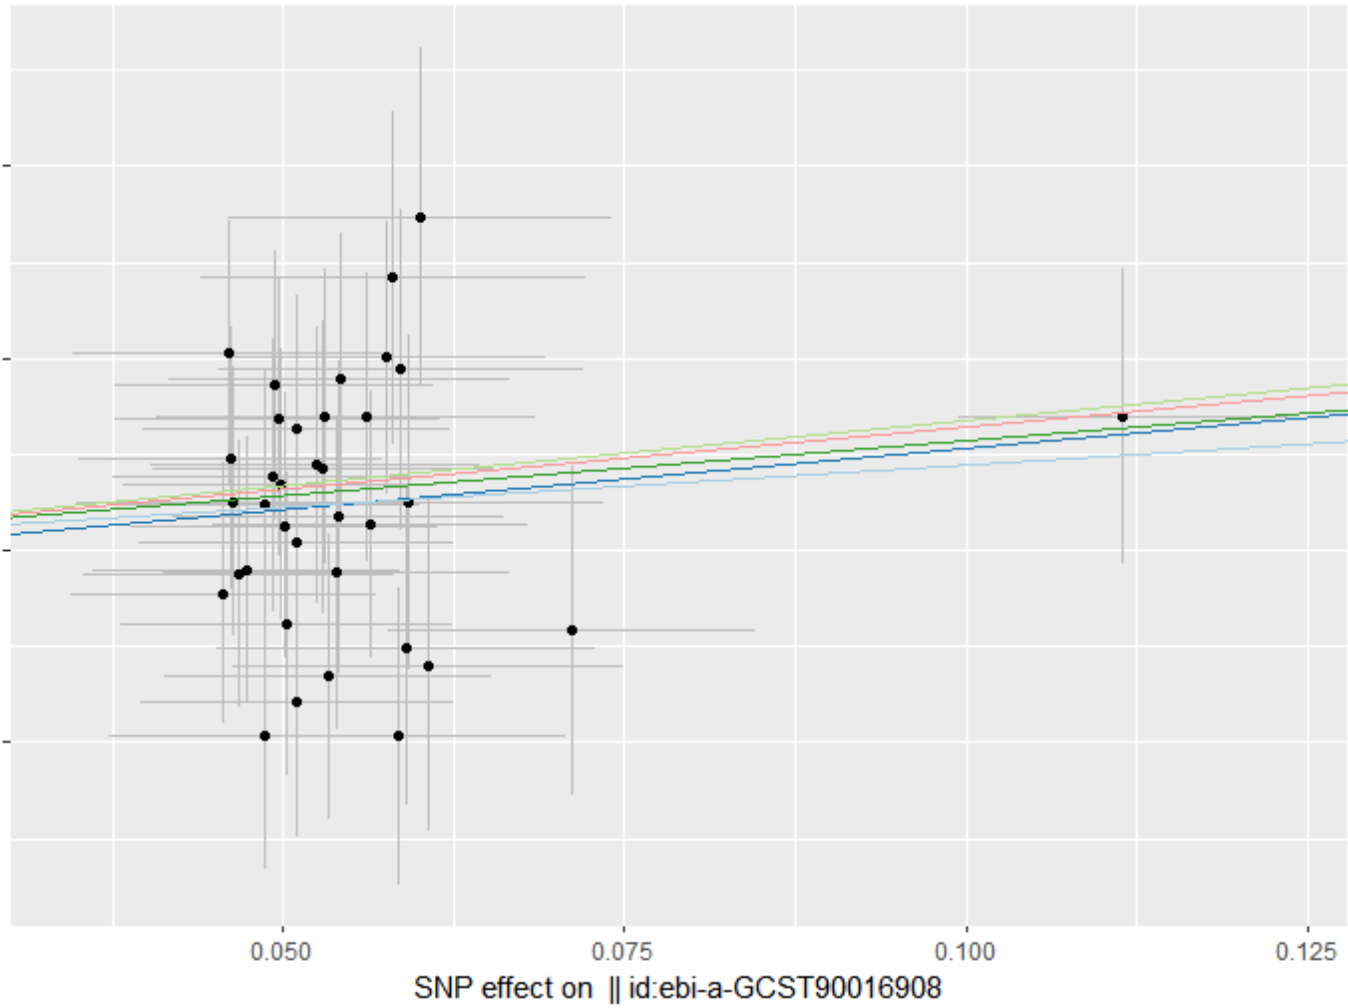

**Figure 142** Leave-one-out analysis, funnel plot, MR effect size and scatter plot for gut microbiota abundance (class Bacilli id.1673) on coeliac disease

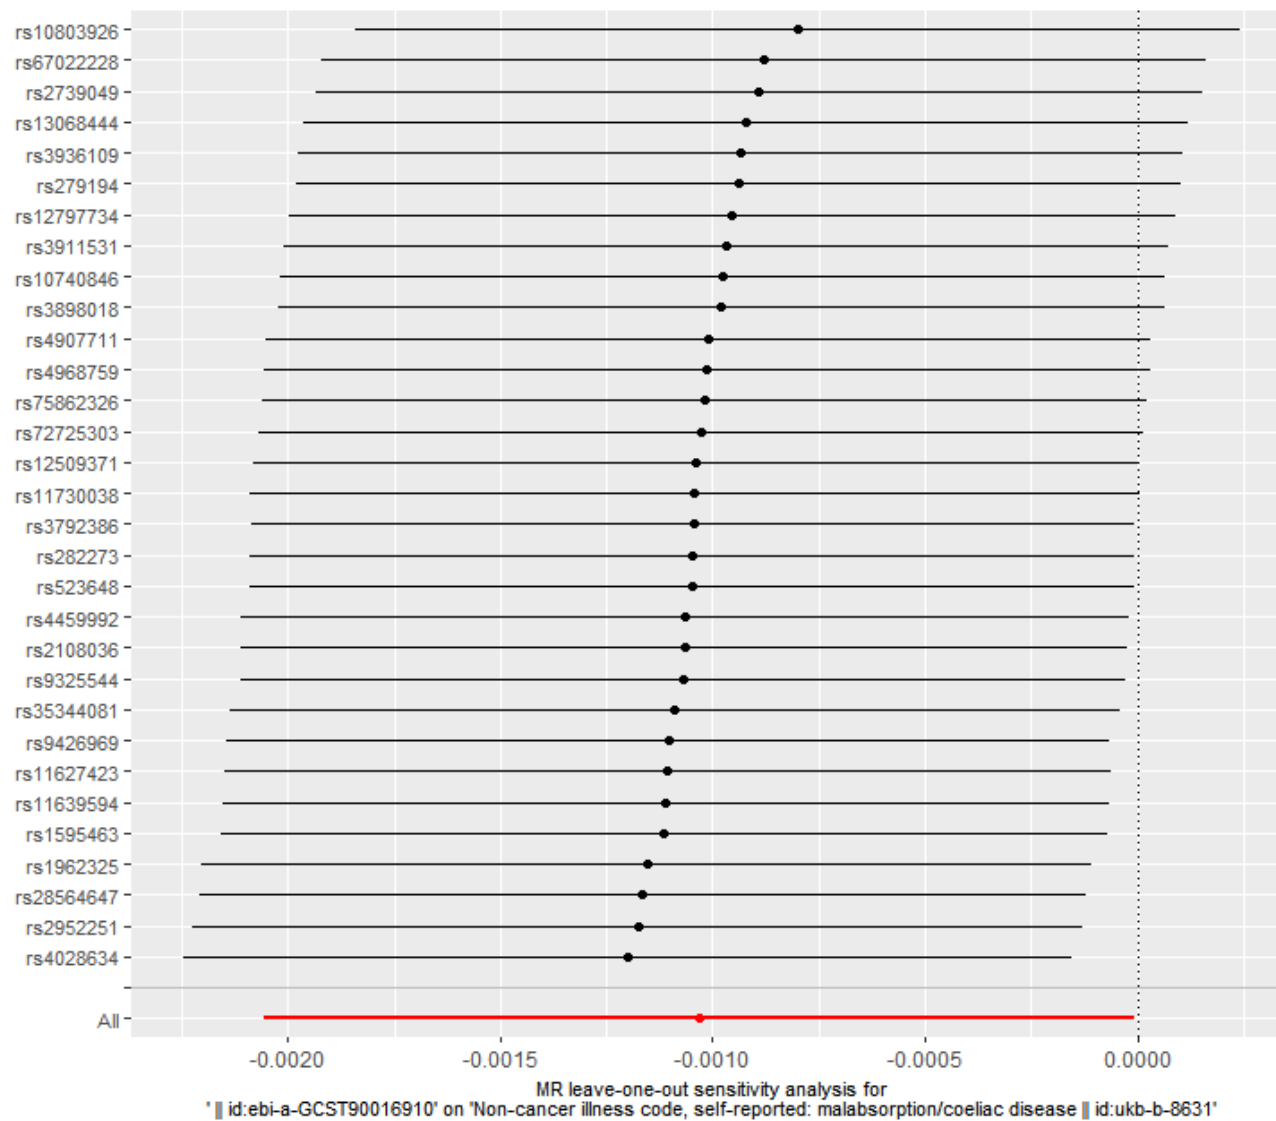

MR Method

- Inverse variance weighted
- MR Egger

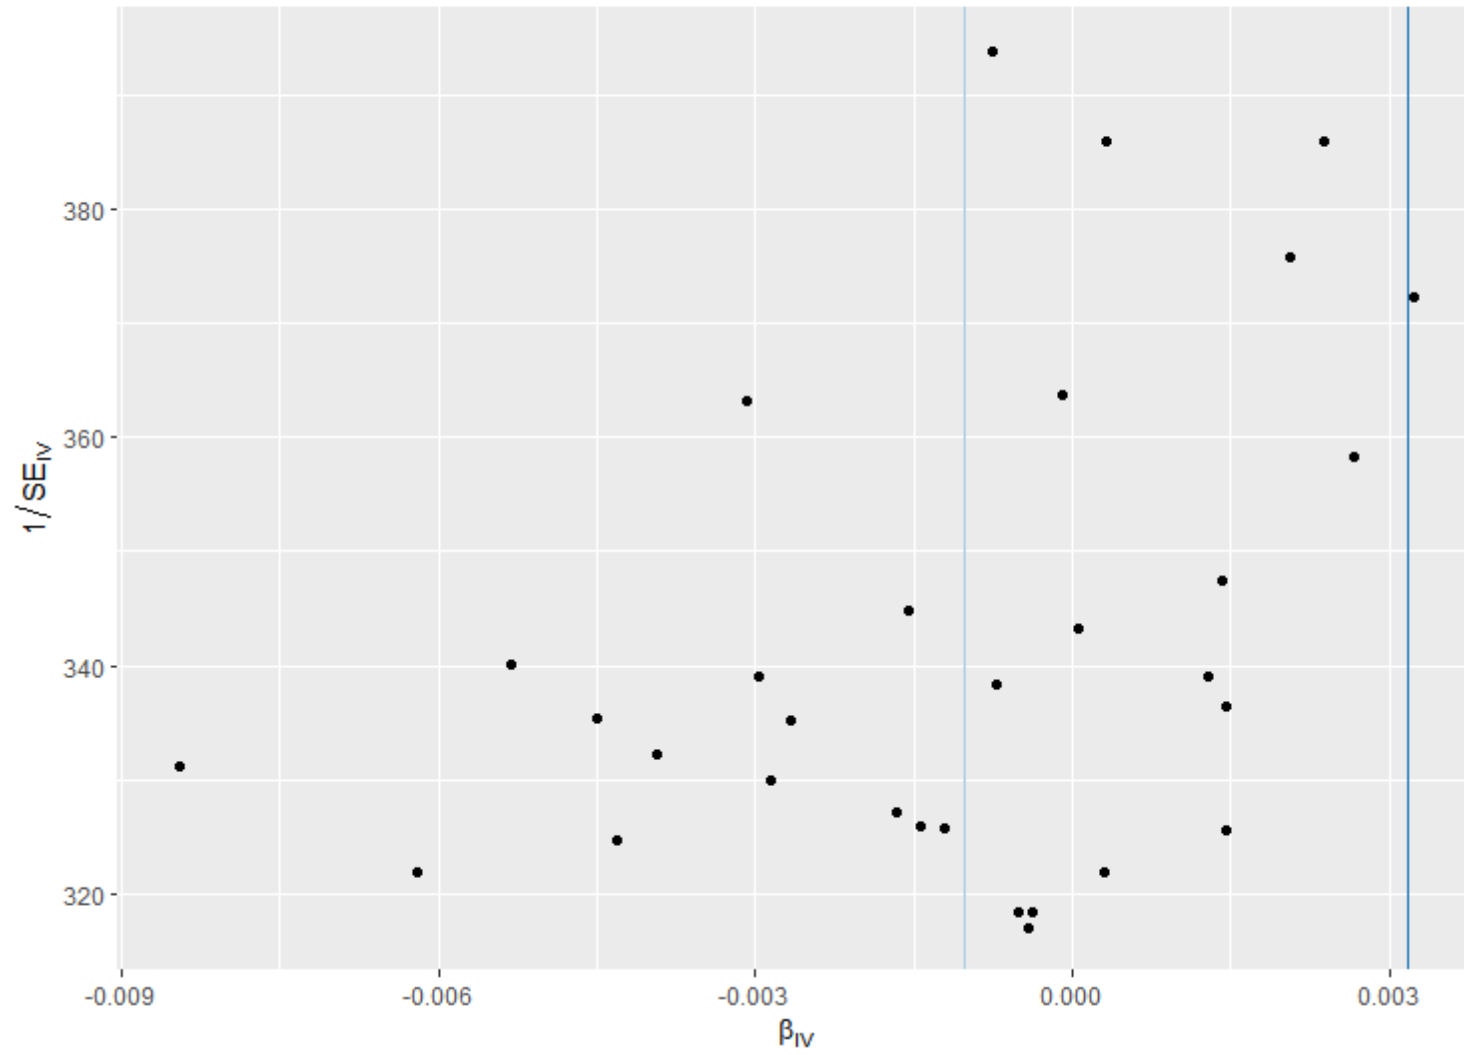

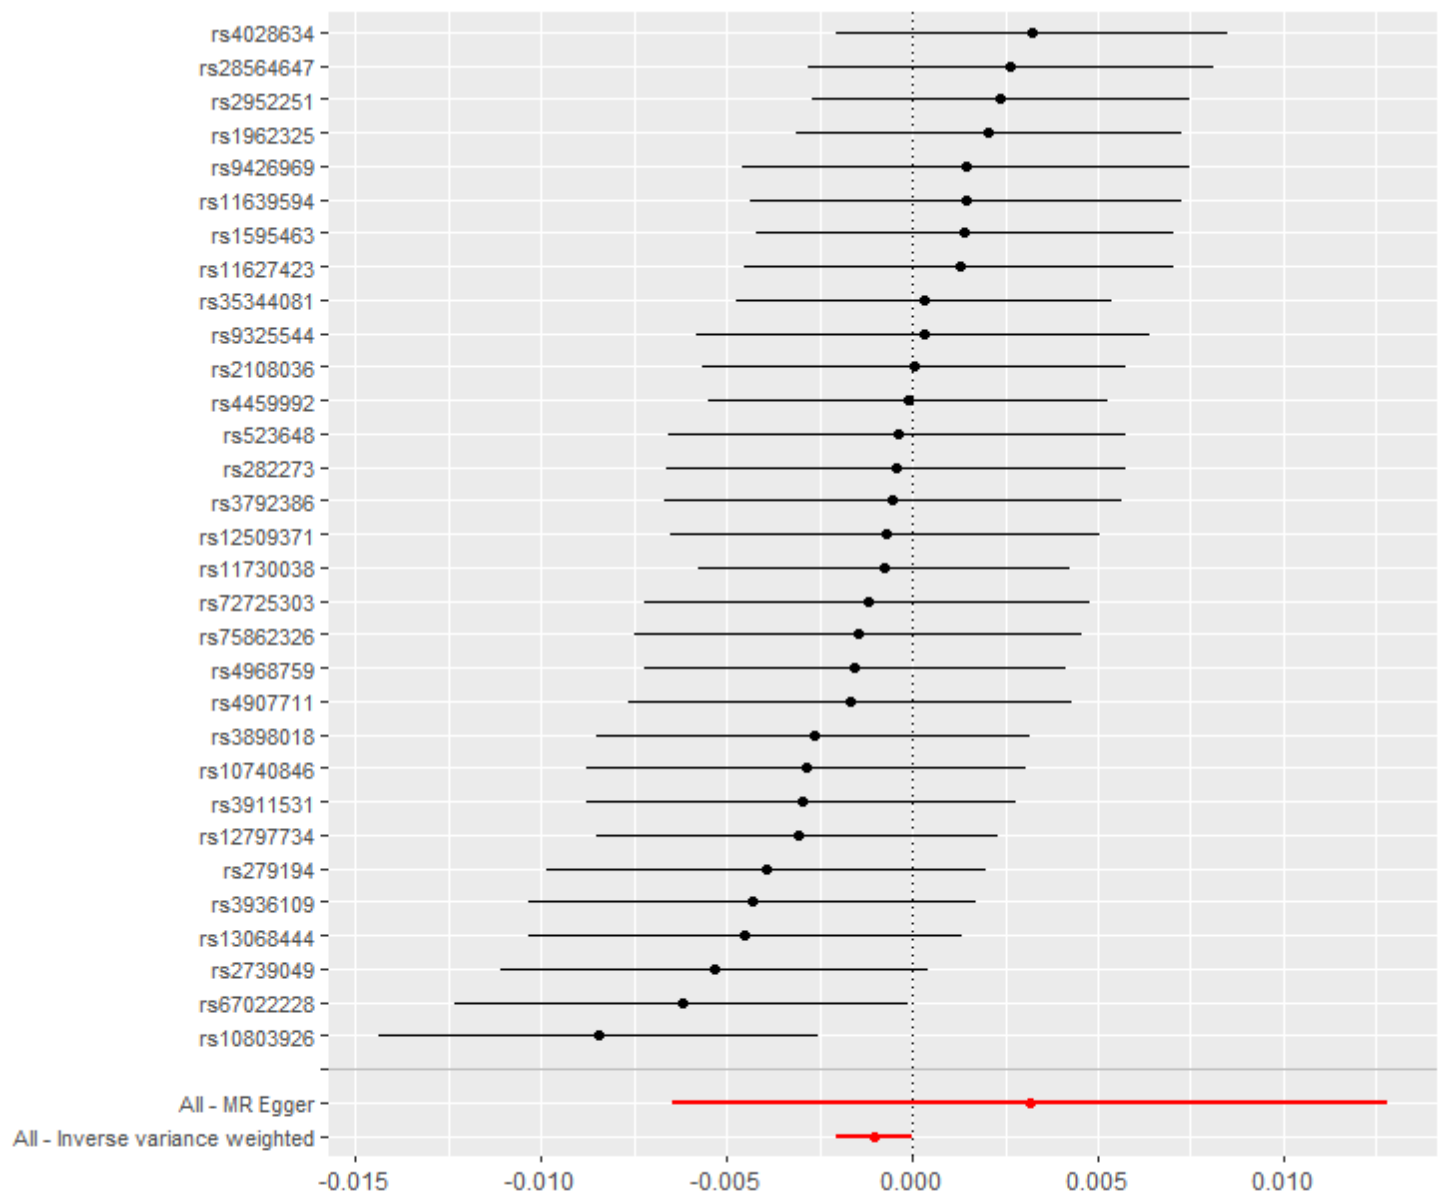

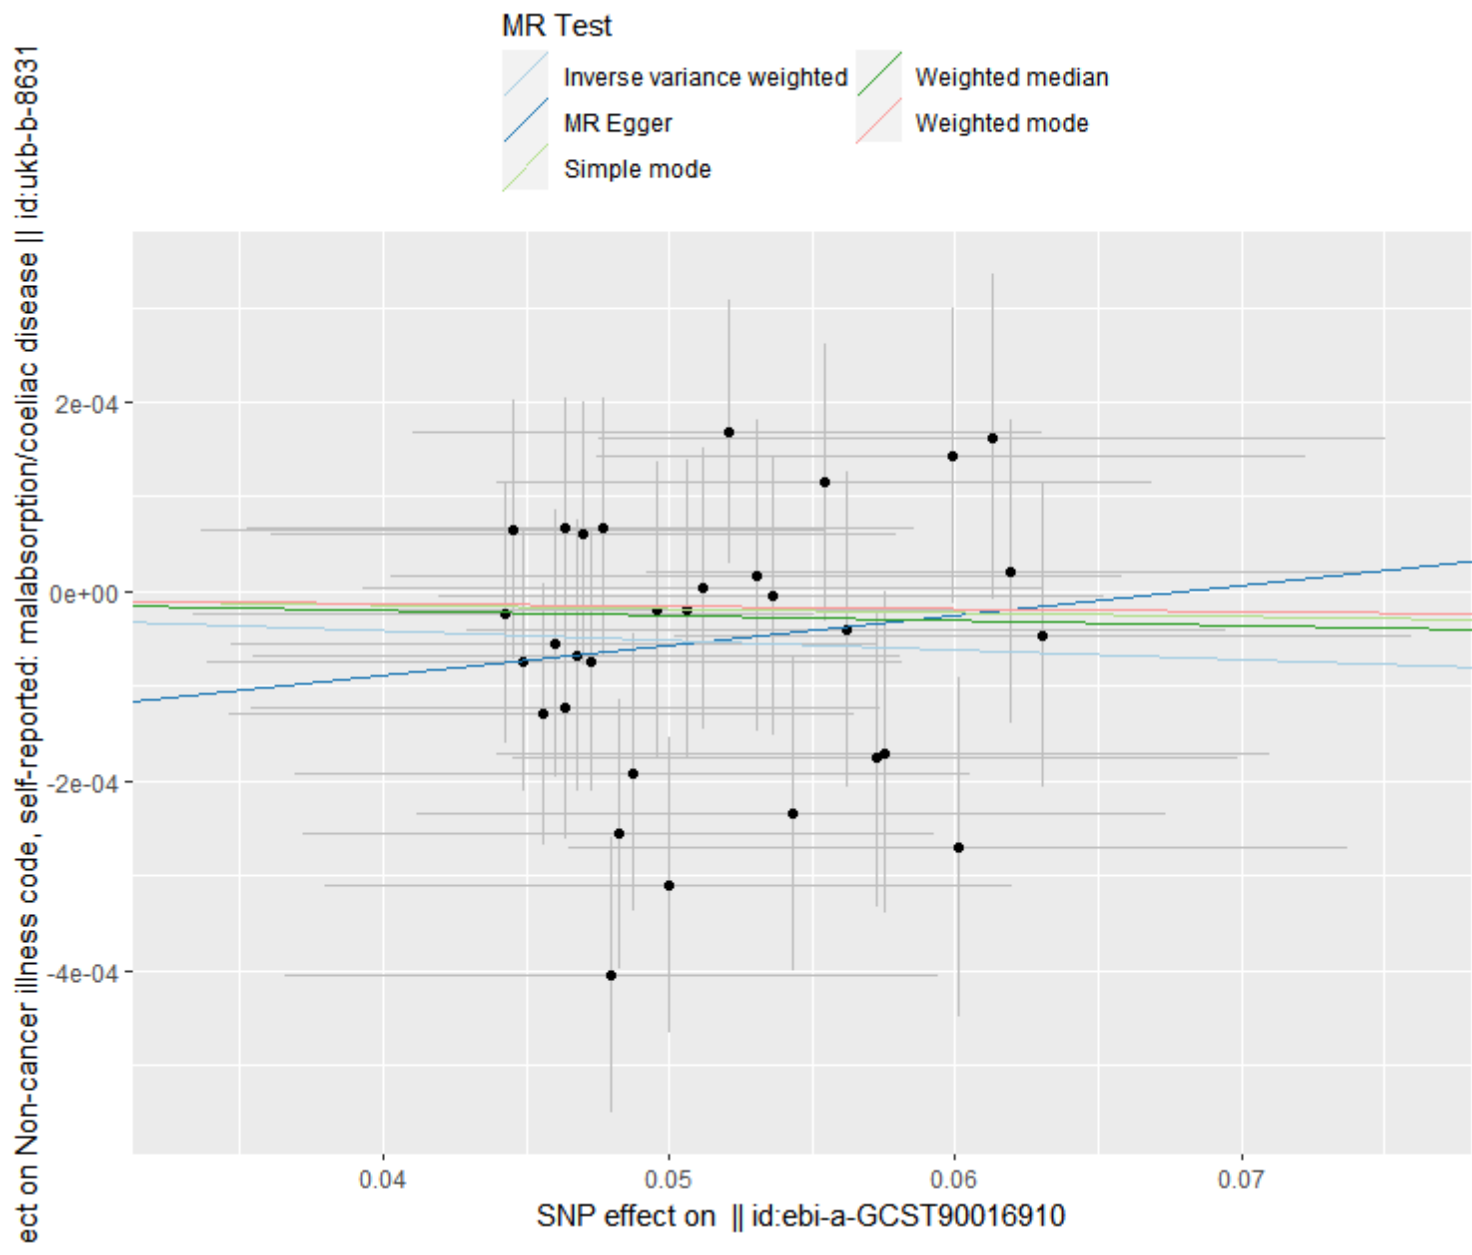



**Figure 143** Leave-one-out analysis, funnel plot, MR effect size and scatter plot for gut microbiota abundance (family Bacteroidaceae id.917) on coeliac disease

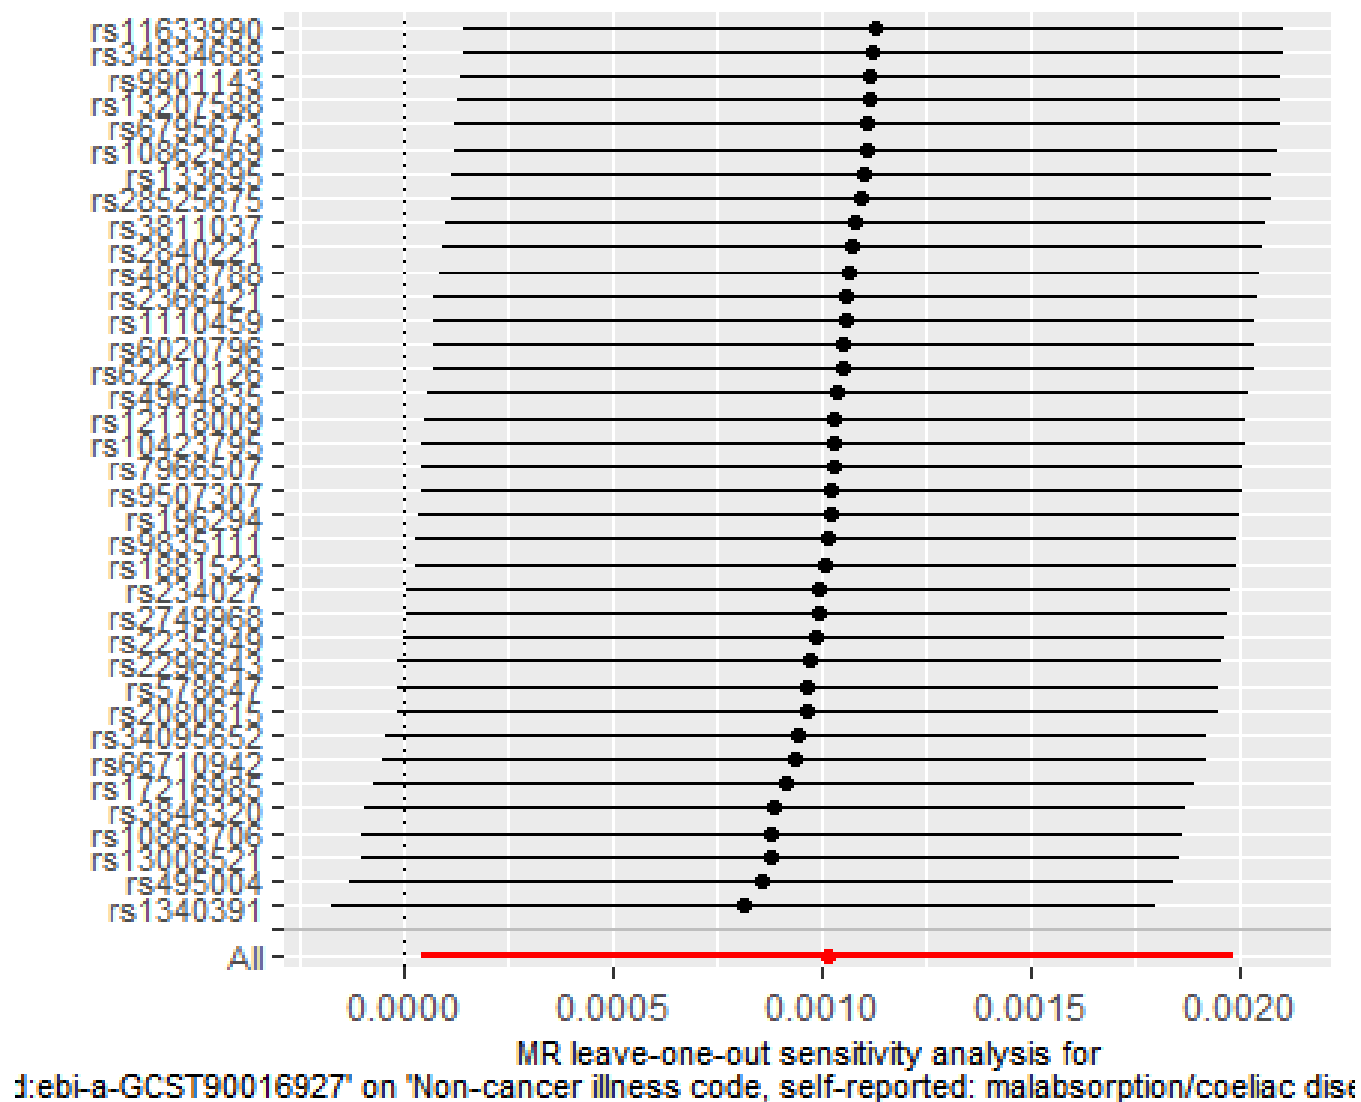

### MR Method

- Inverse variance weighted
- MR Egger

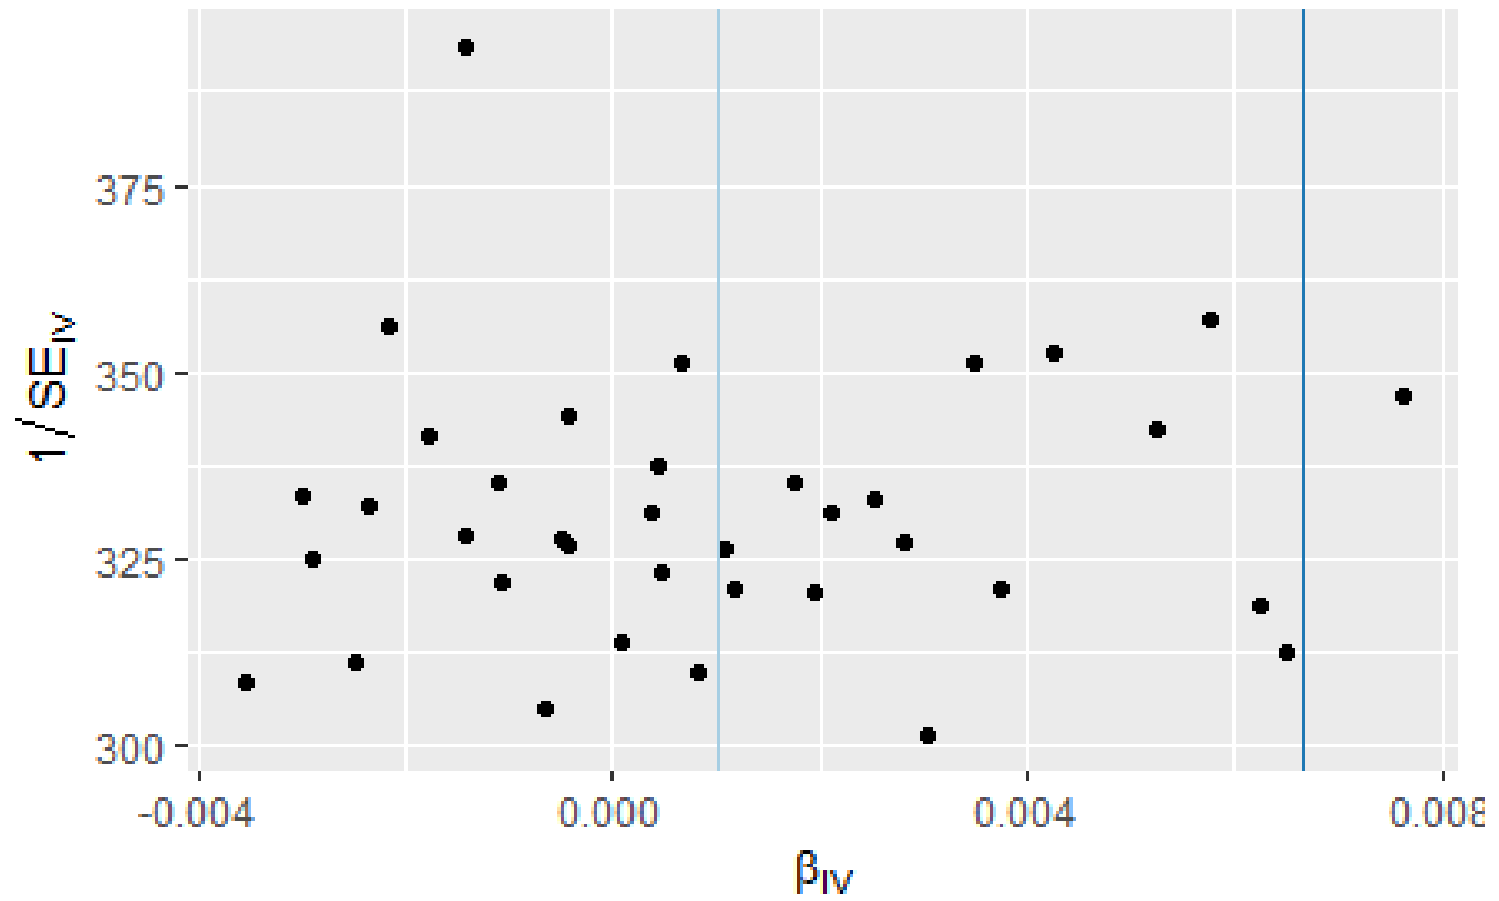

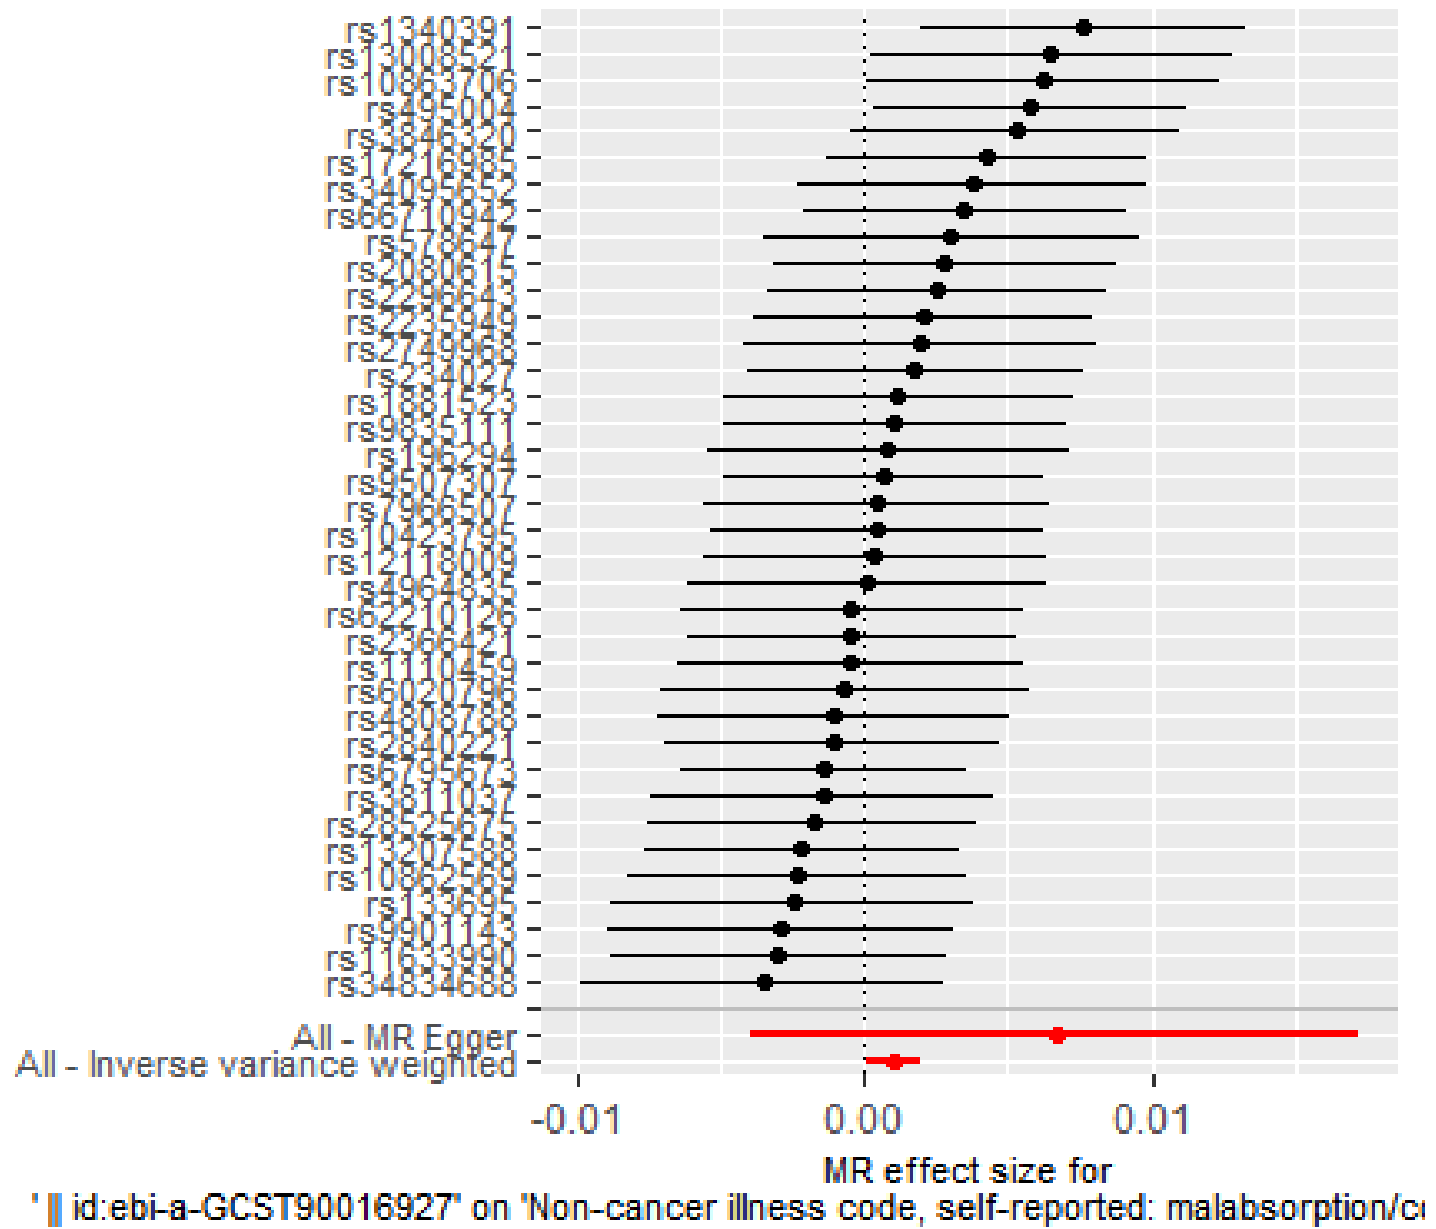

Illness code, self-reported: malabsorption/coeliac disease ||

### MR Test

- Inverse variance weighted
- MR Egger
- Simple mode
- Weighted median
- Weighted mode

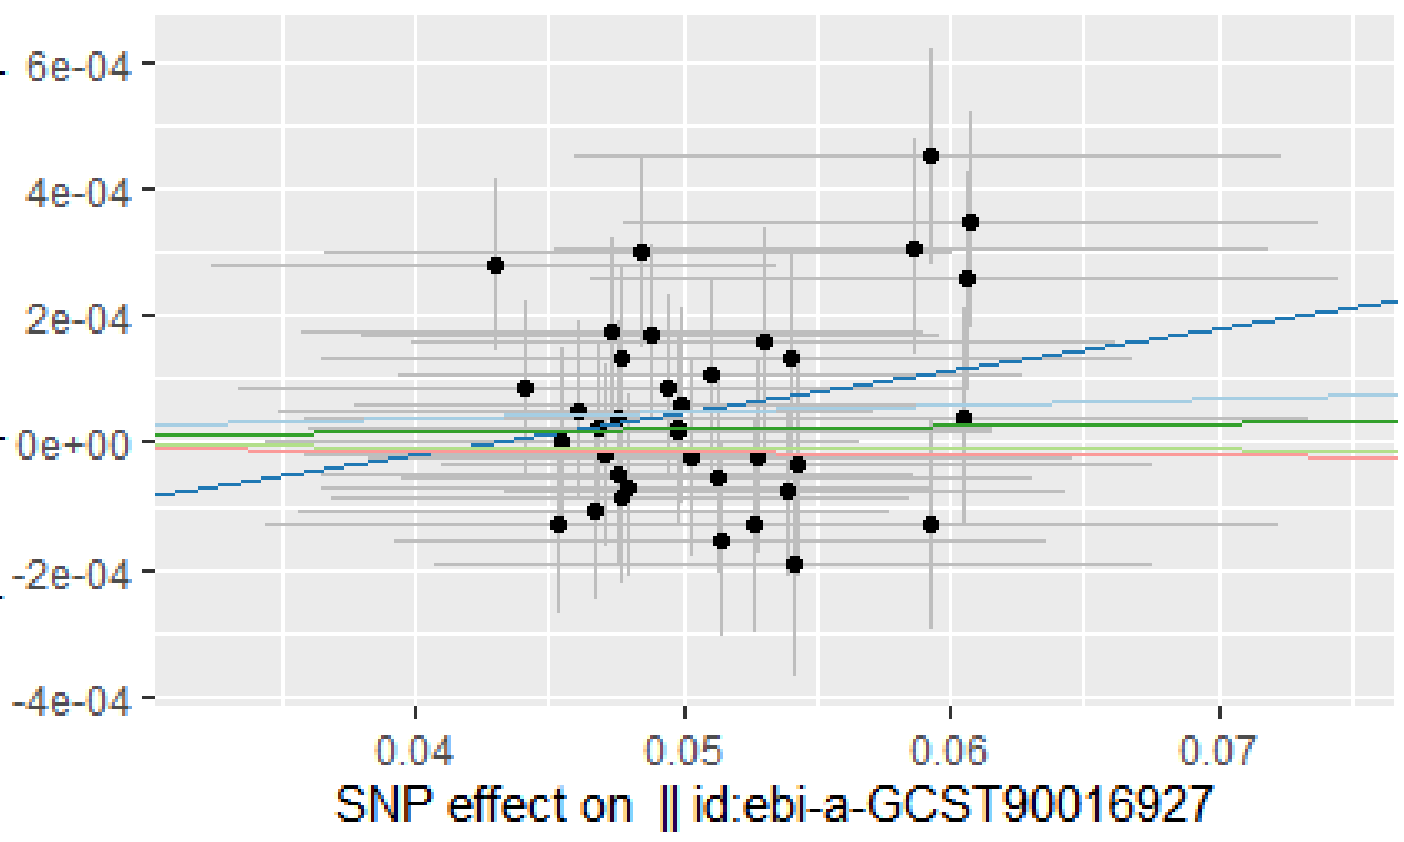

**Figure 144** Leave-one-out analysis, funnel plot, MR effect size and scatter plot for gut microbiota abundance (family Streptococcaceae id.1850) on coeliac disease

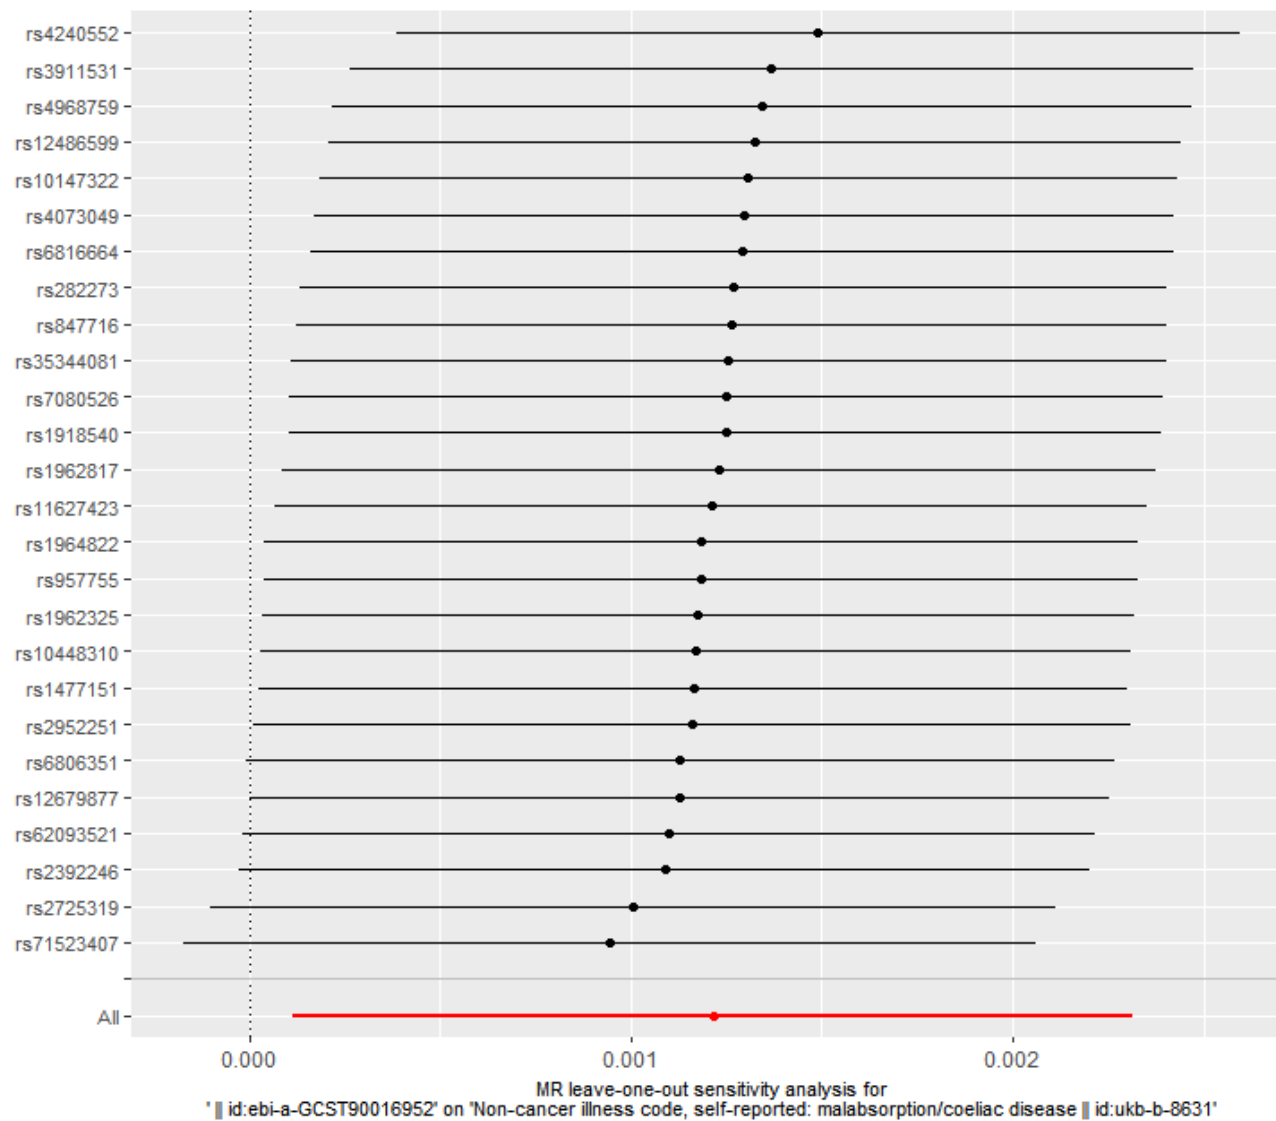

MR Method

- Inverse variance weighted
- MR Egger

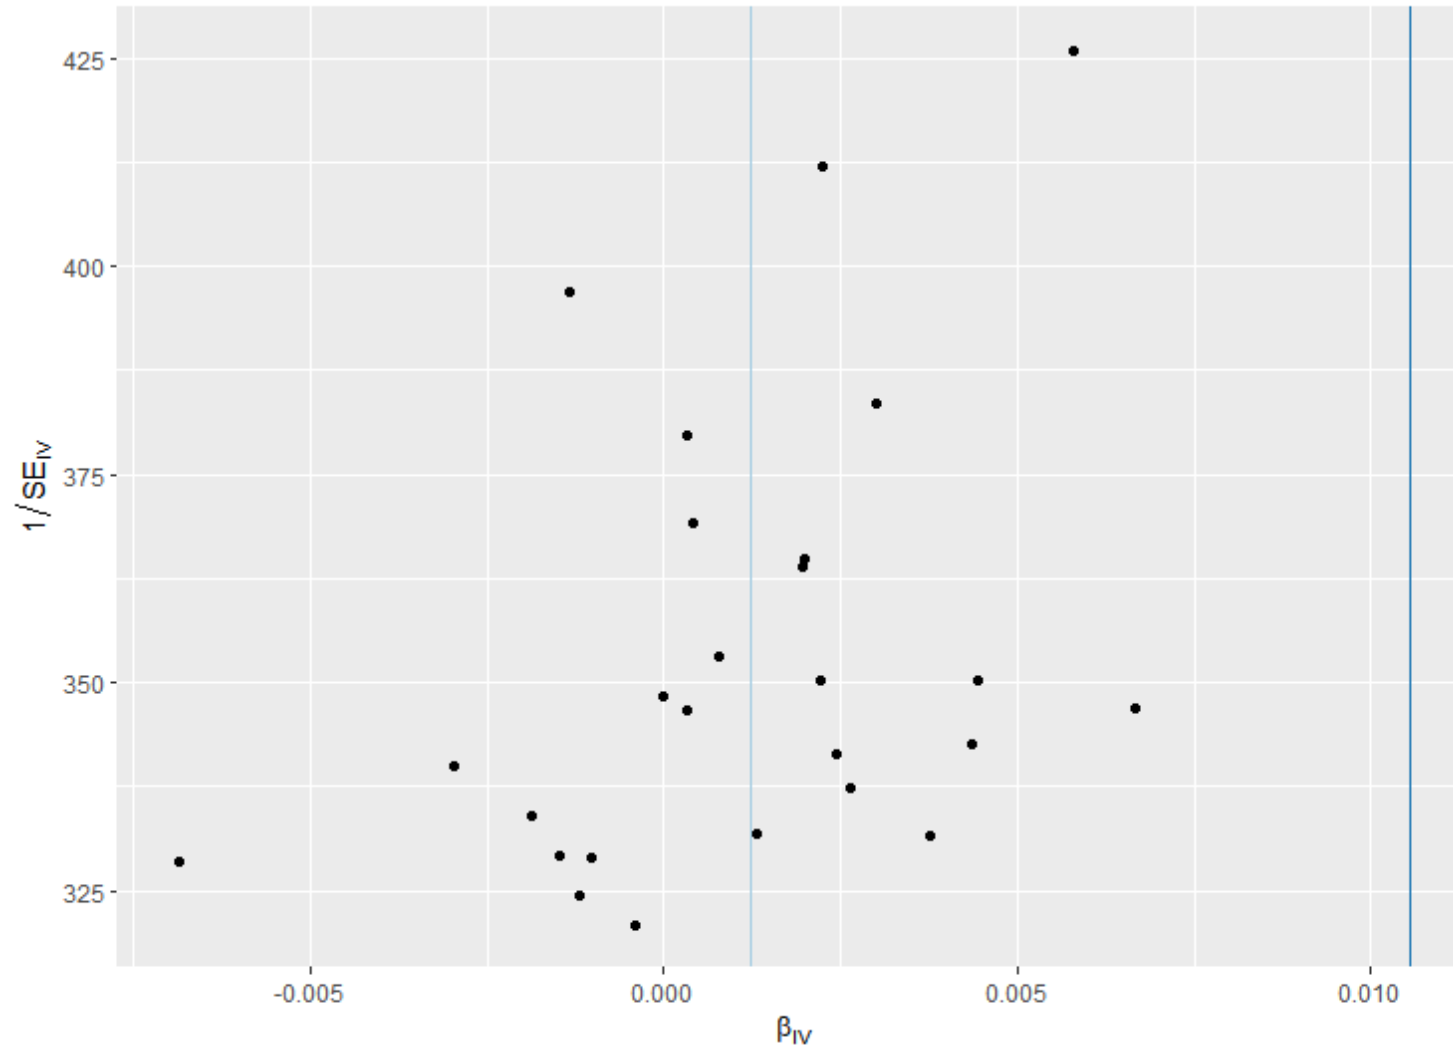

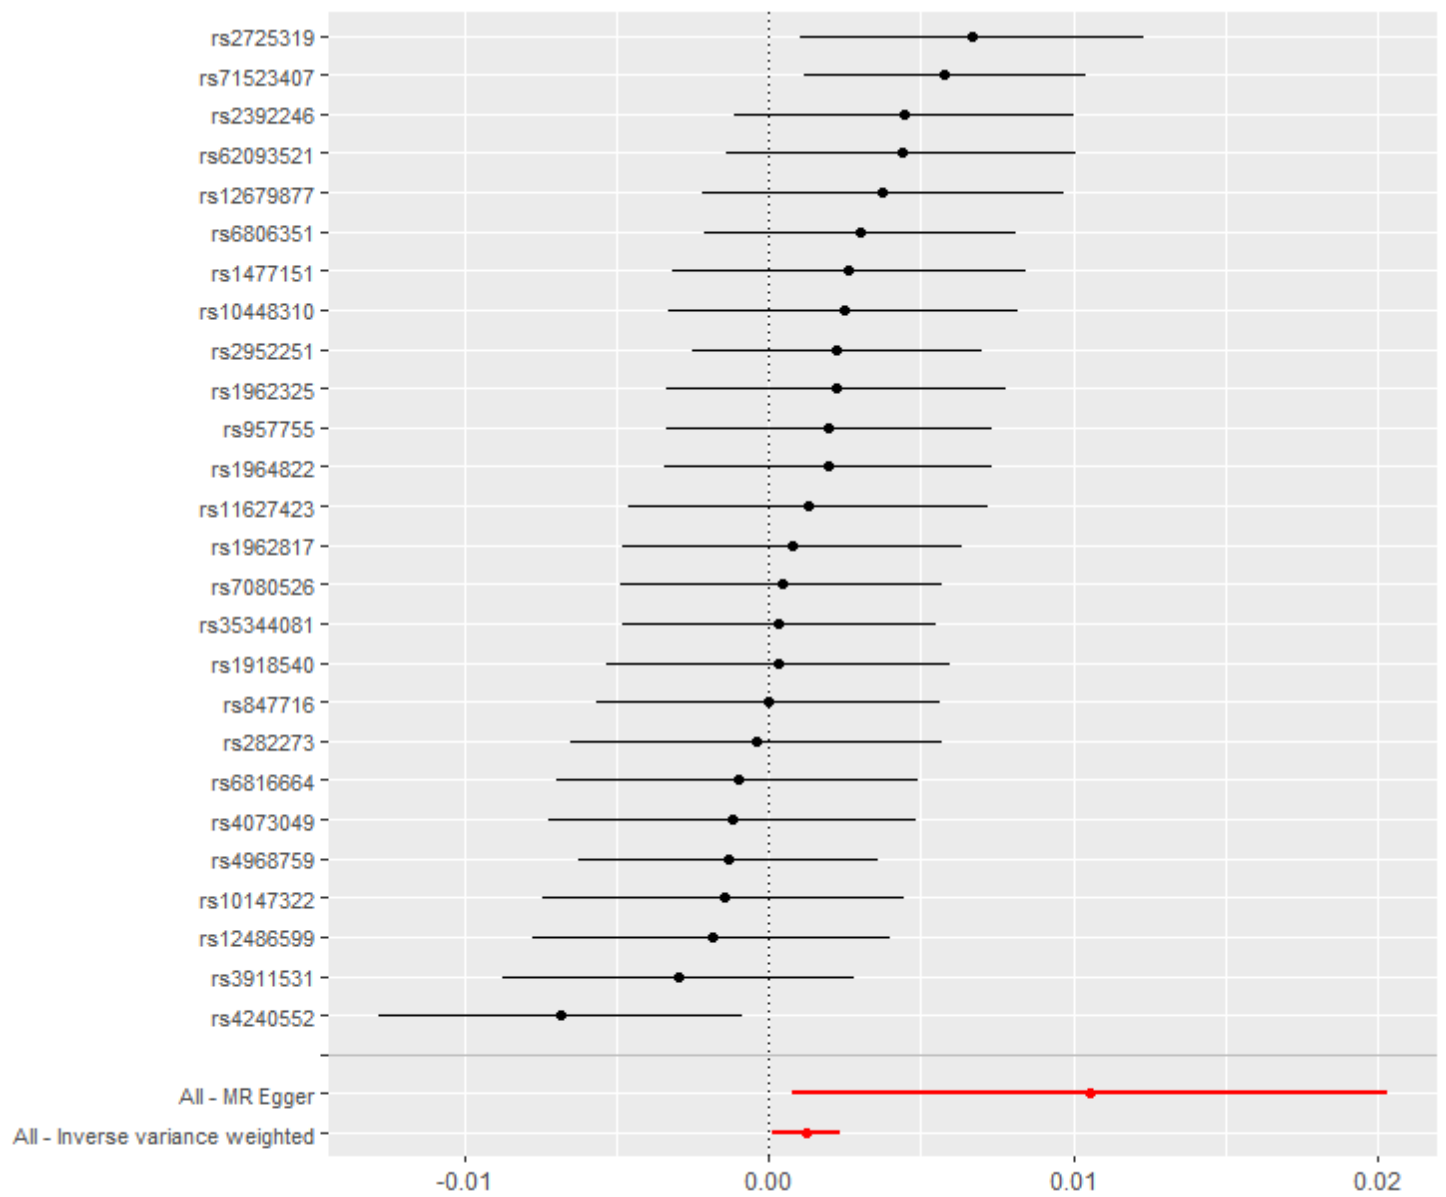

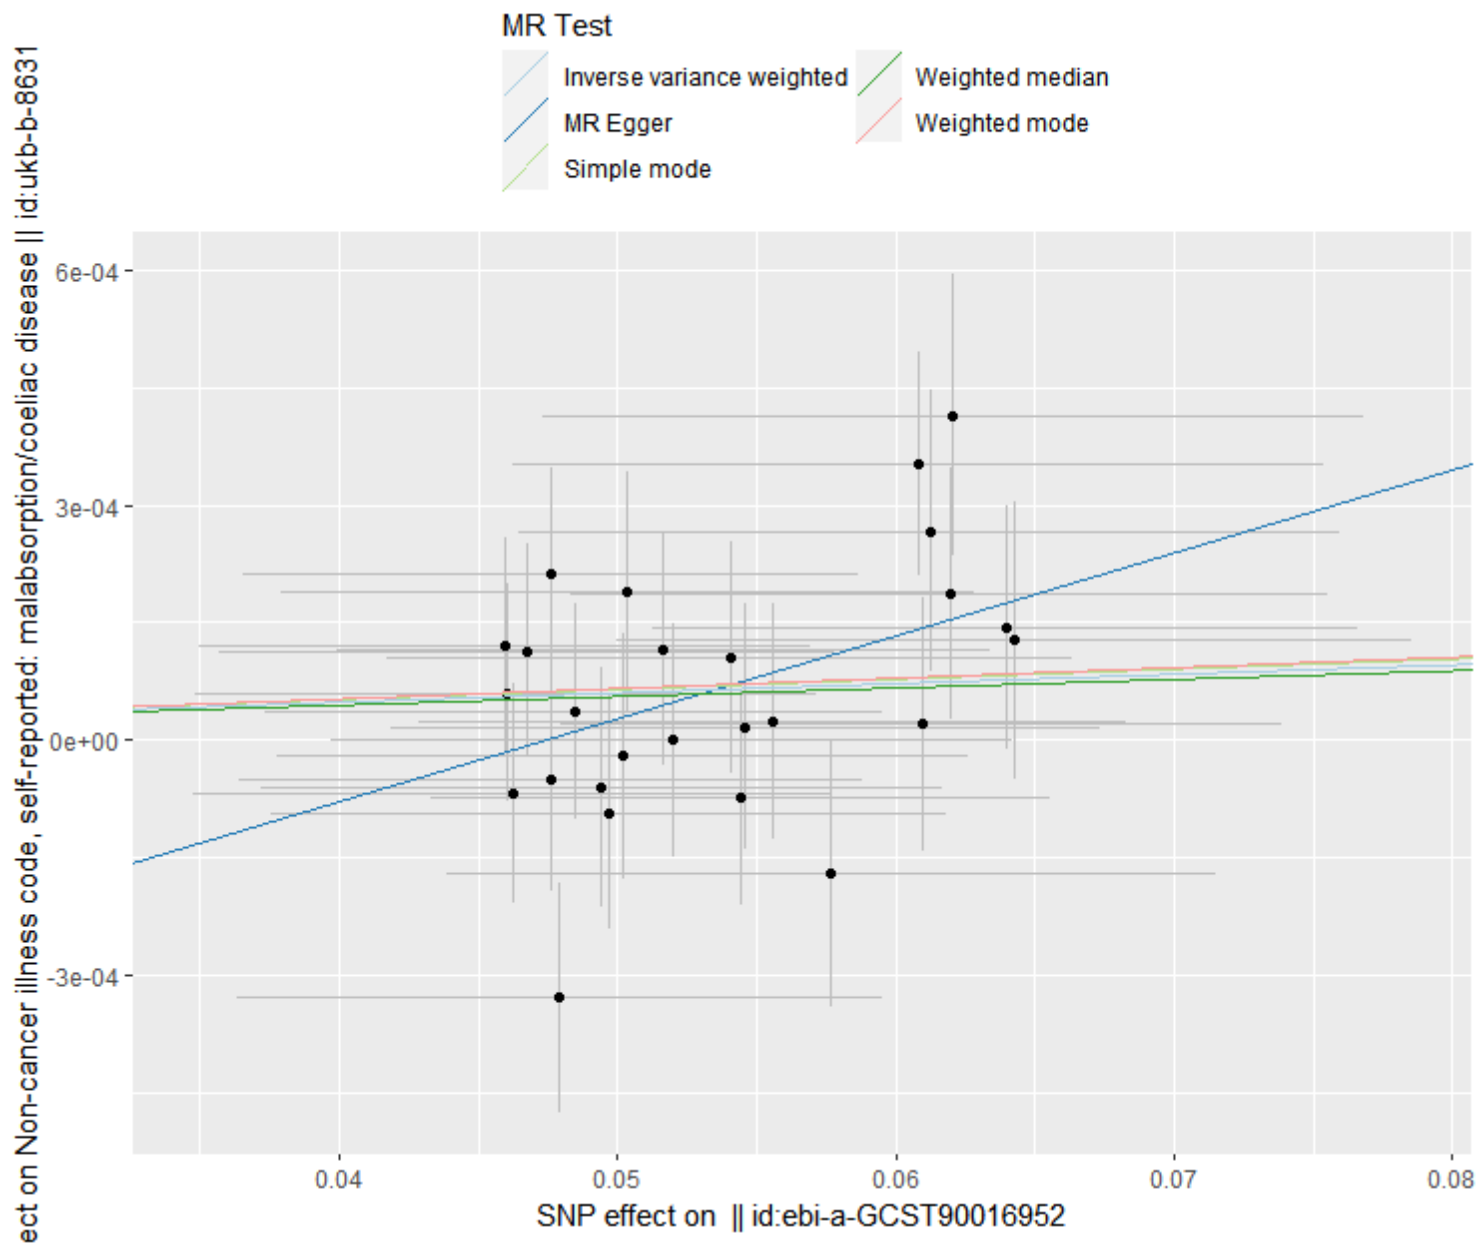



**Figure 145** Leave-one-out analysis, funnel plot, MR effect size and scatter plot for gut microbiota abundance (genus Bacteroides id.918) on coeliac disease

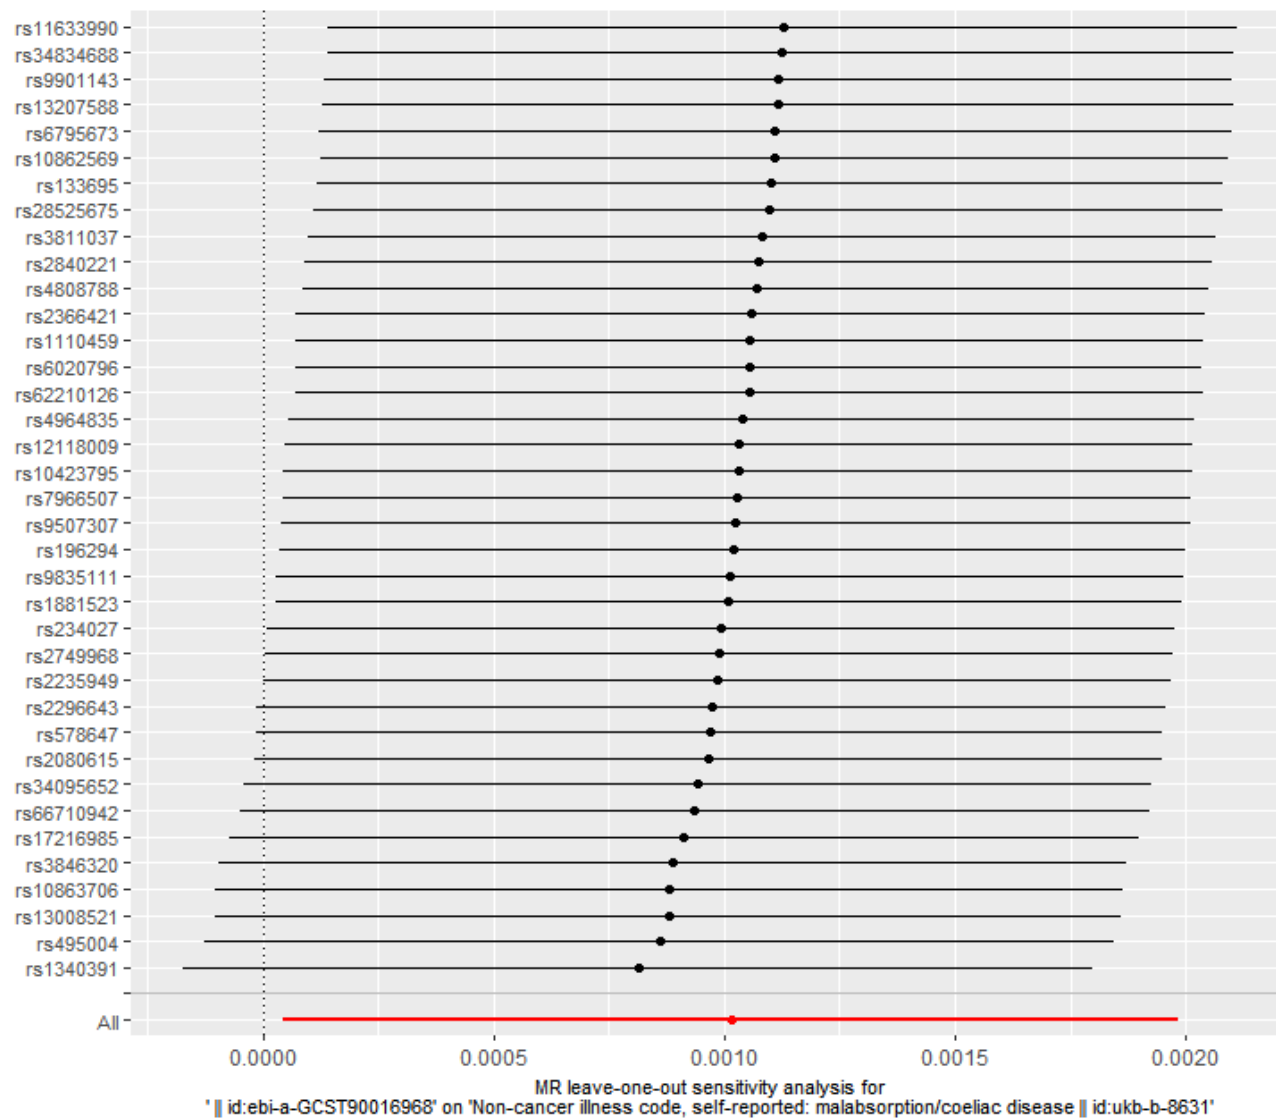

MR Method

- Inverse variance weighted
- MR Egger

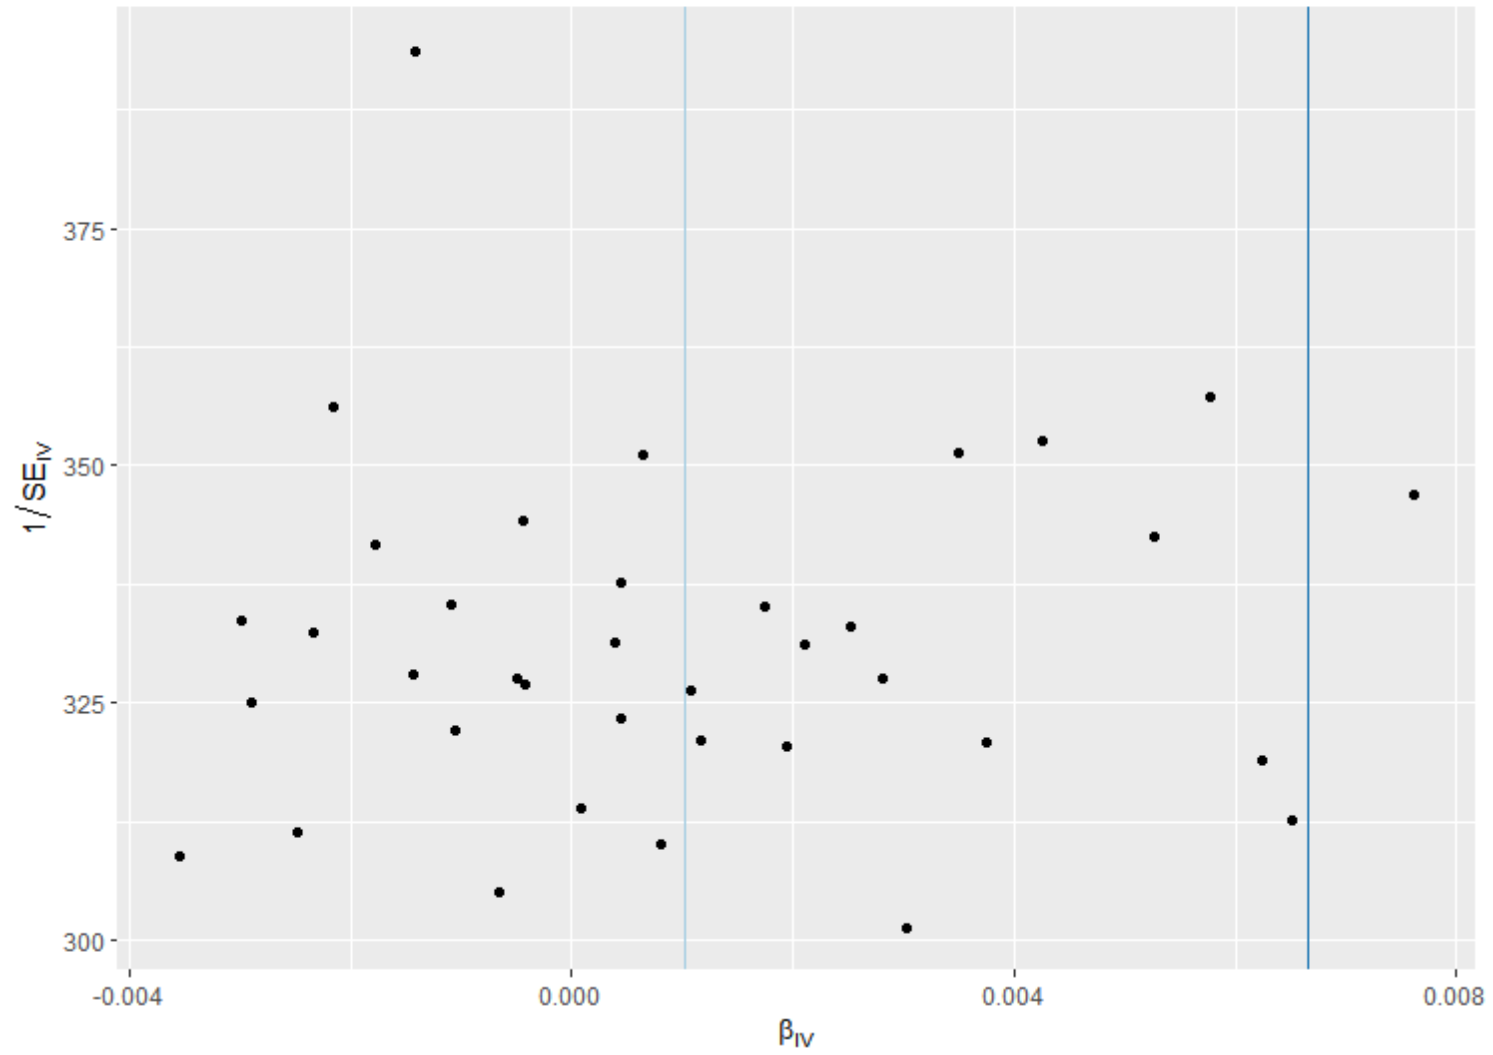

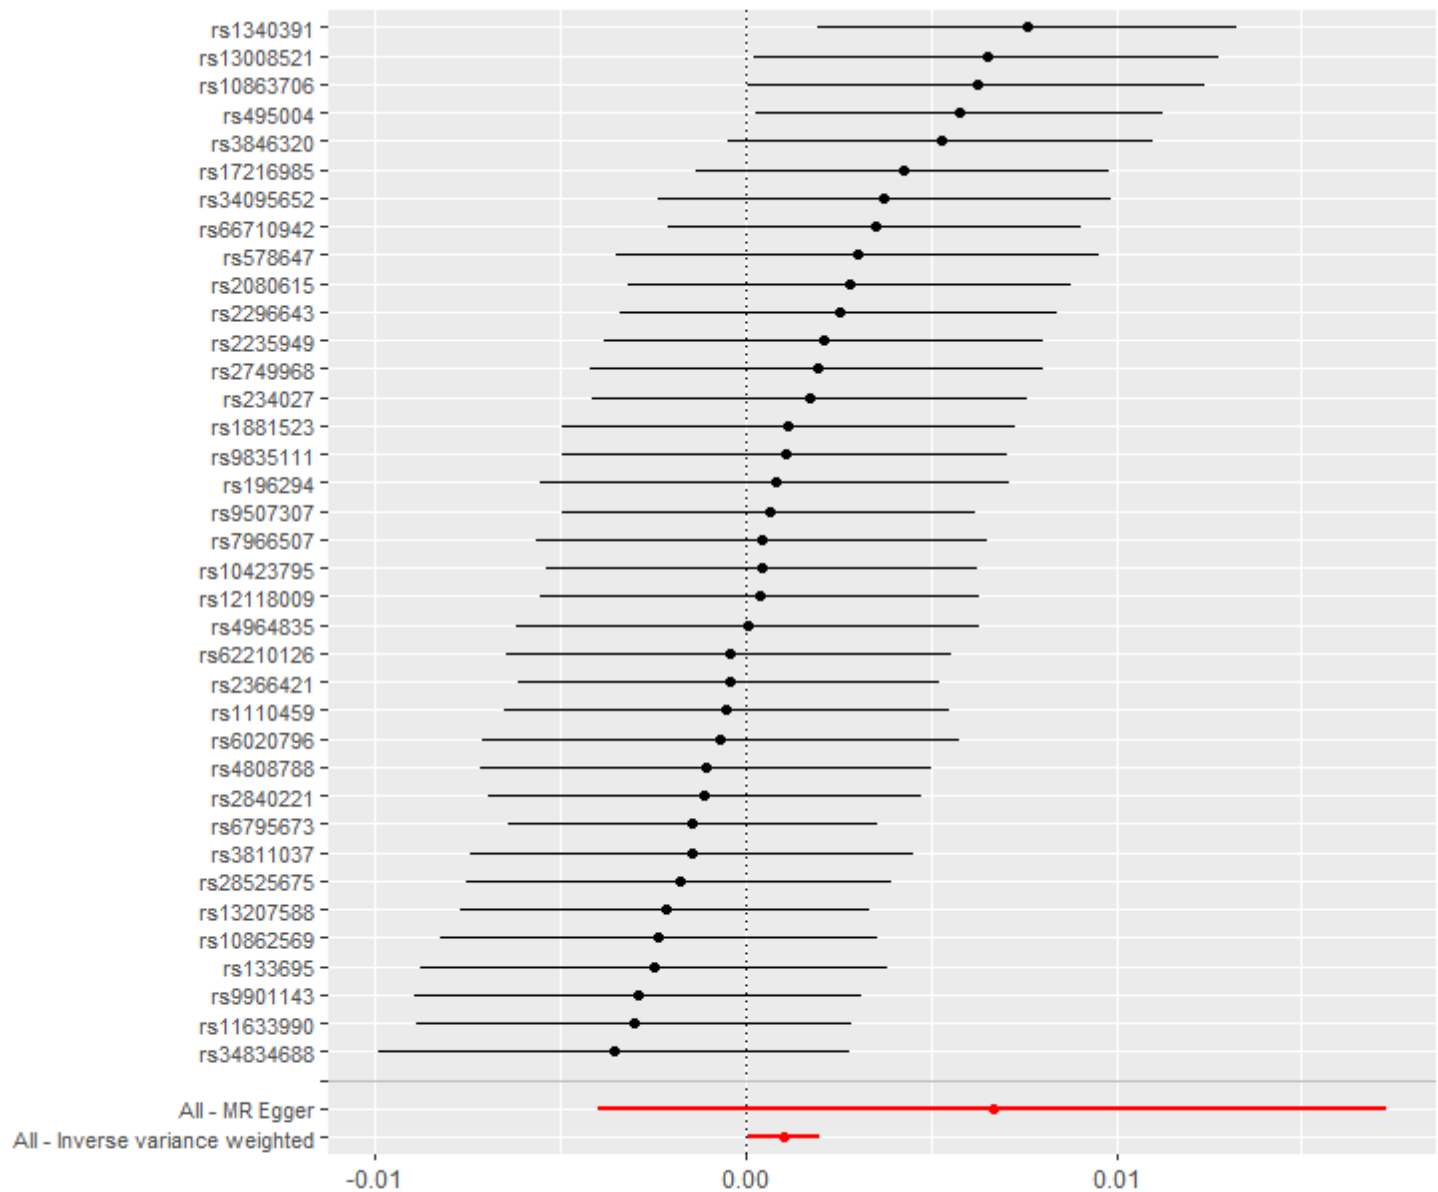

MR effect size for  
 ' || id:ebi-a-GCST90016968' on 'Non-cancer illness code, self-reported: malabsorption/coeliac disease || id:ukb-b-8631'

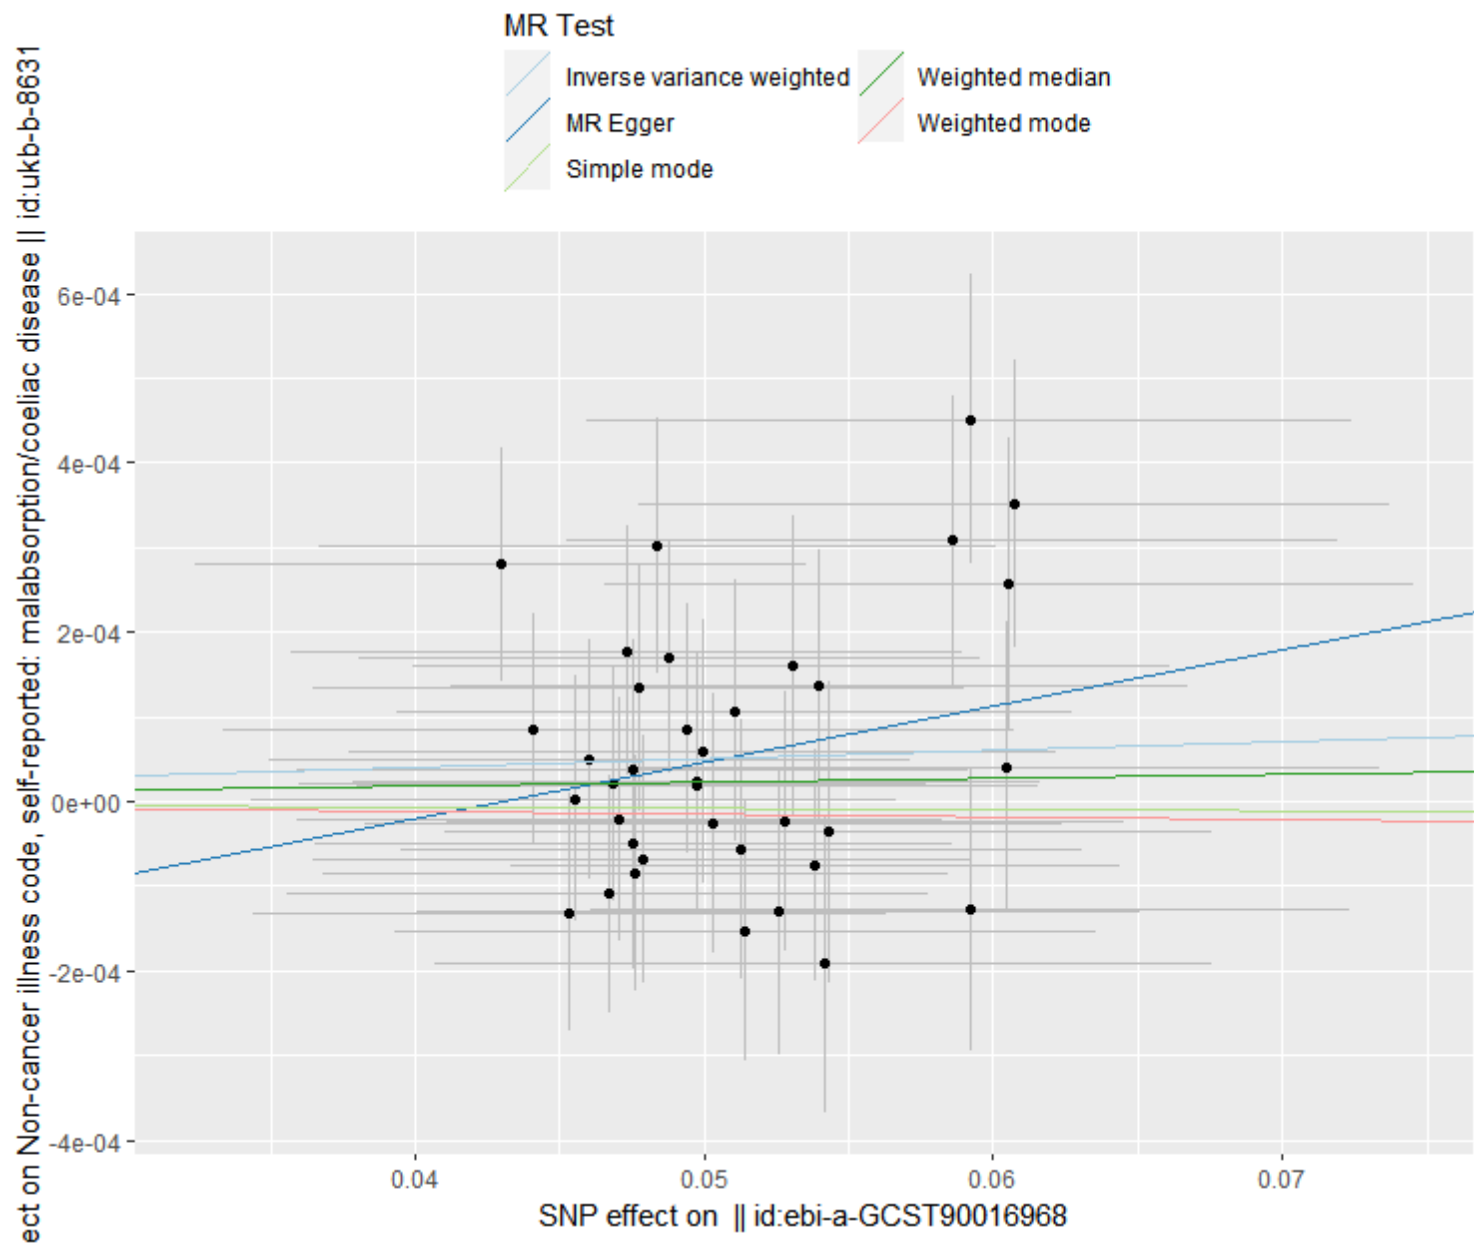

**Figure 146** Leave-one-out analysis, funnel plot, MR effect size and scatter plot for gut microbiota abundance (genus *Barnesiella* id.944) on coeliac disease

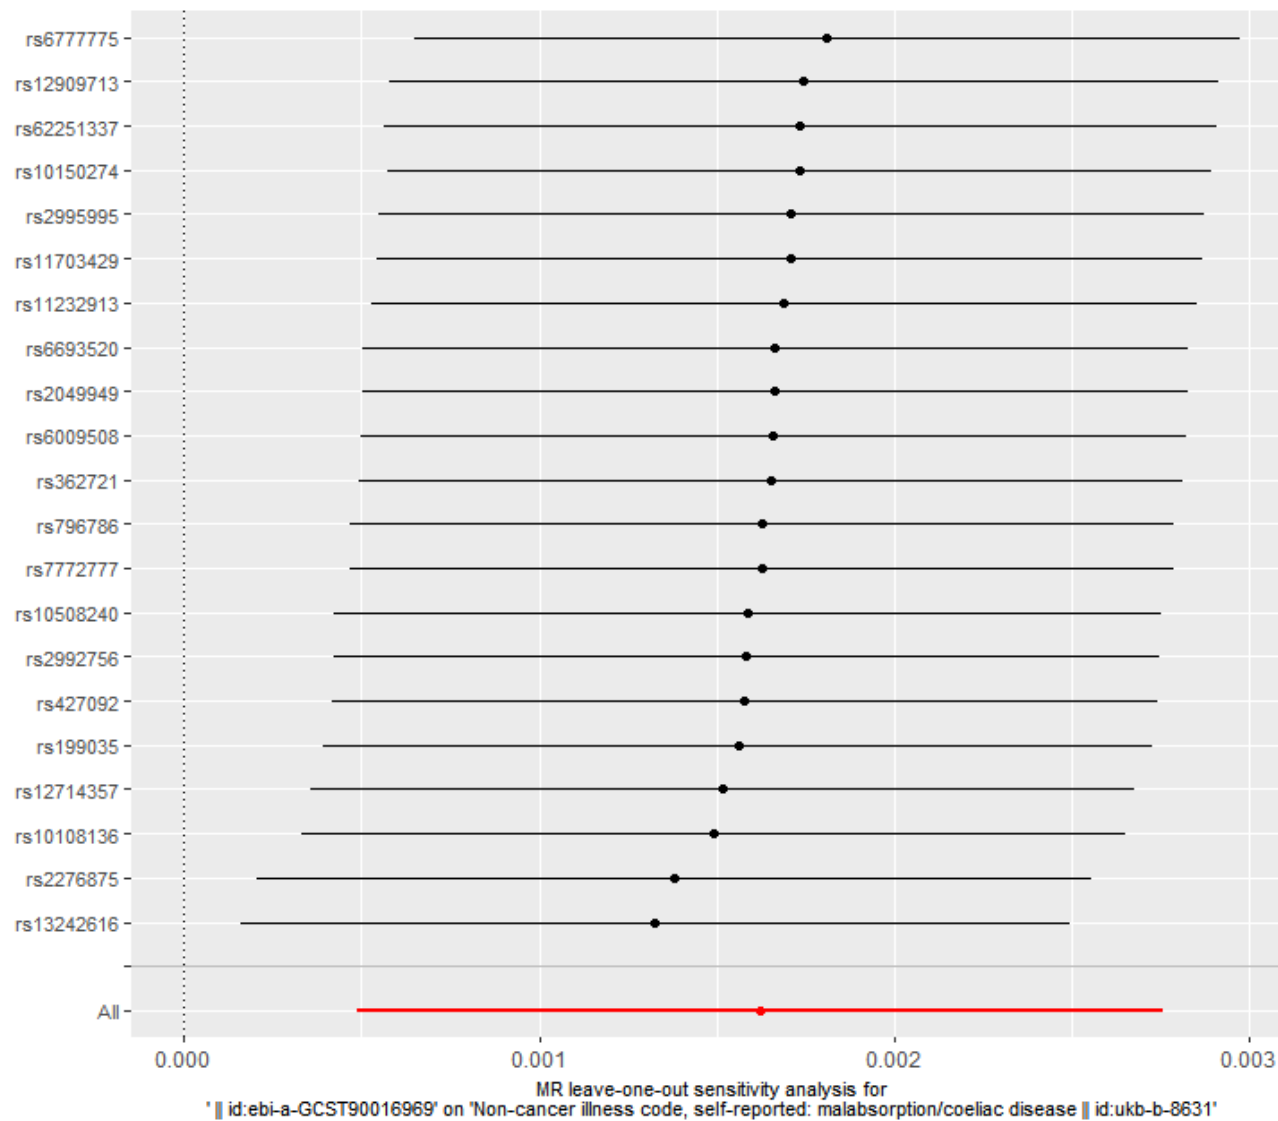

MR Method

- Inverse variance weighted
- MR Egger

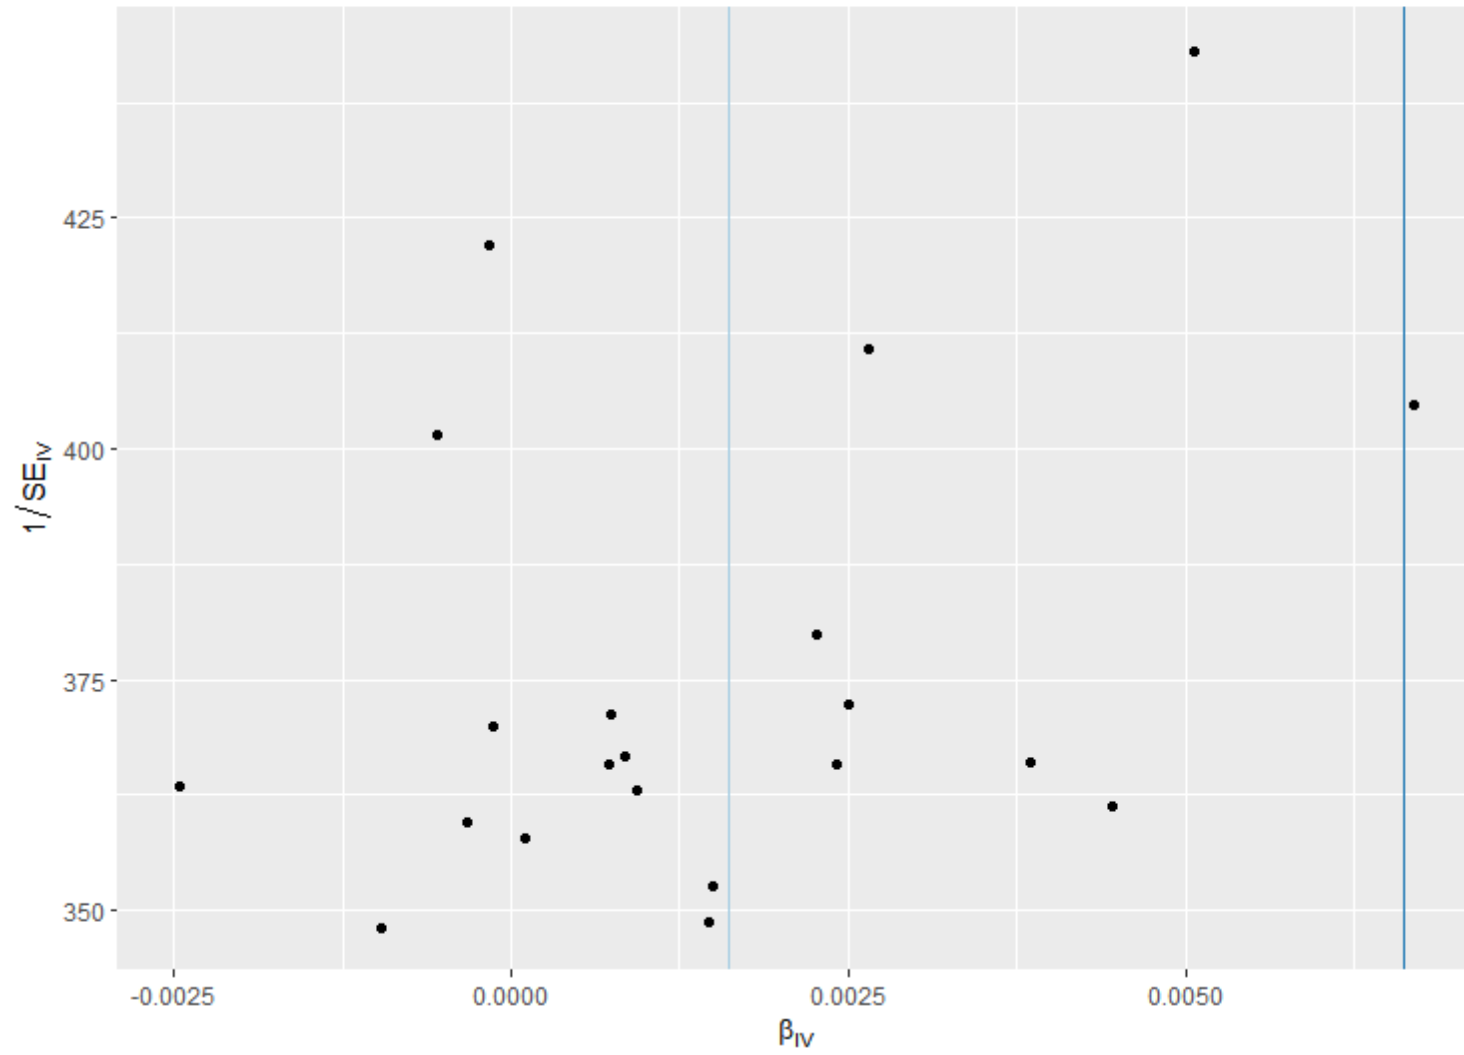

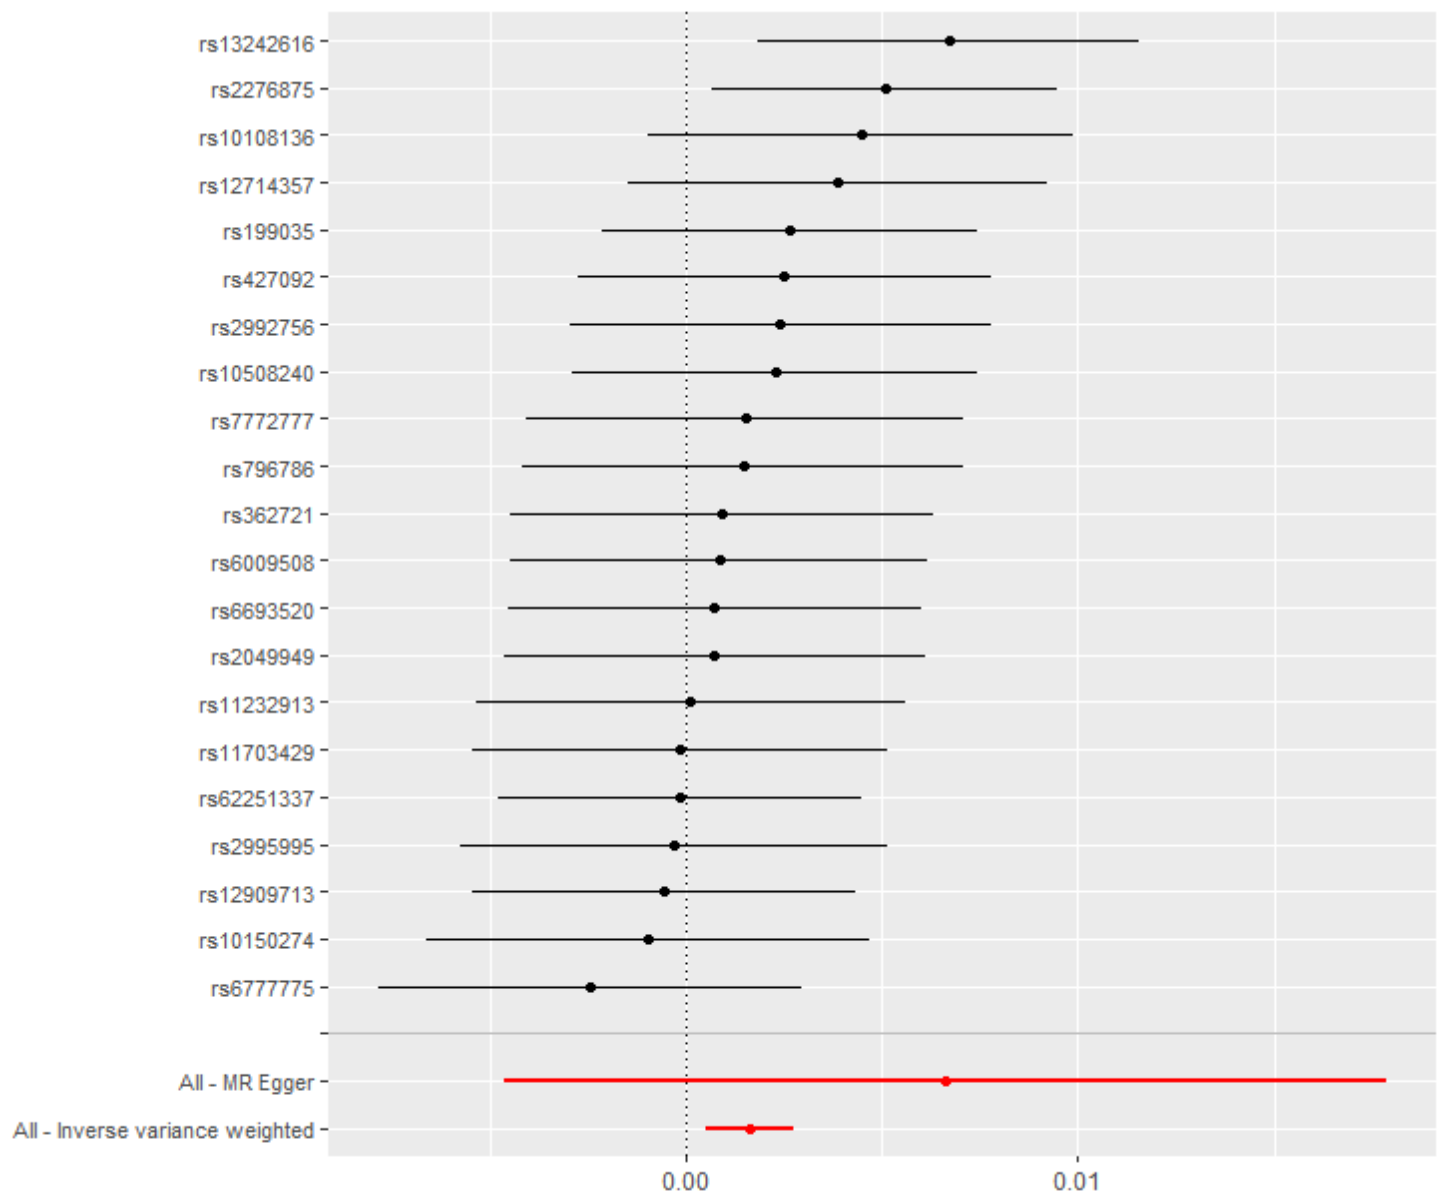

MR effect size for  
 ' || id:ebi-a-GCST90016969' on 'Non-cancer illness code, self-reported: malabsorption/coeliac disease || id:ukb-b-8631'

Effect on Non-cancer illness code, self-reported: malabsorption/coeliac disease || id:ukb-b-8631

### MR Test

- Inverse variance weighted
- MR Egger
- Simple mode
- Weighted median
- Weighted mode

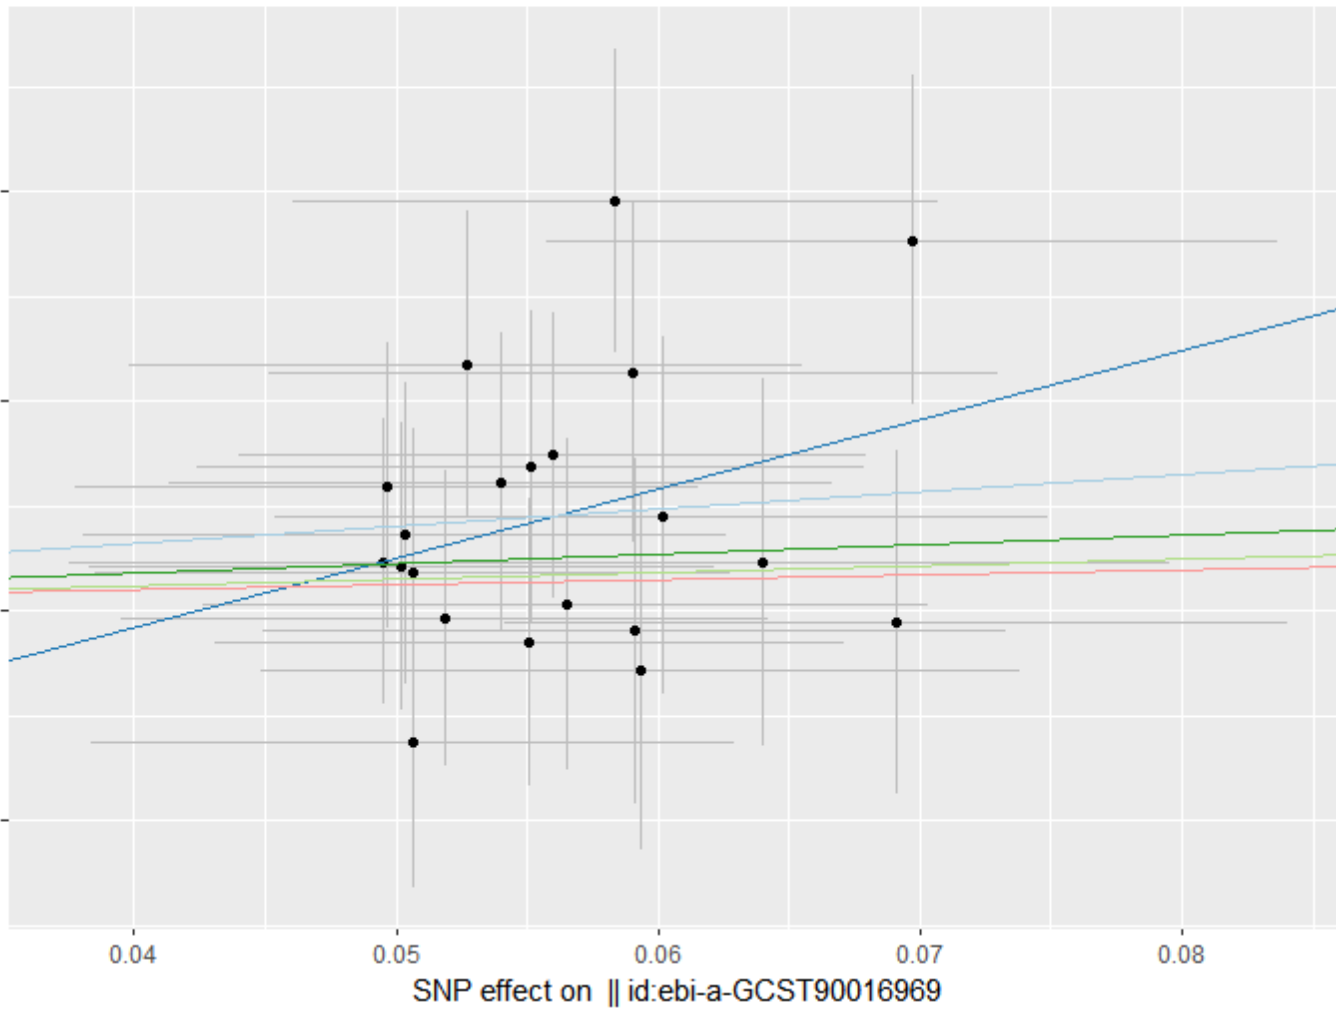



**Figure 147** Leave-one-out analysis, funnel plot, MR effect size and scatter plot for gut microbiota abundance (genus Bifidobacterium id.436) on coeliac disease

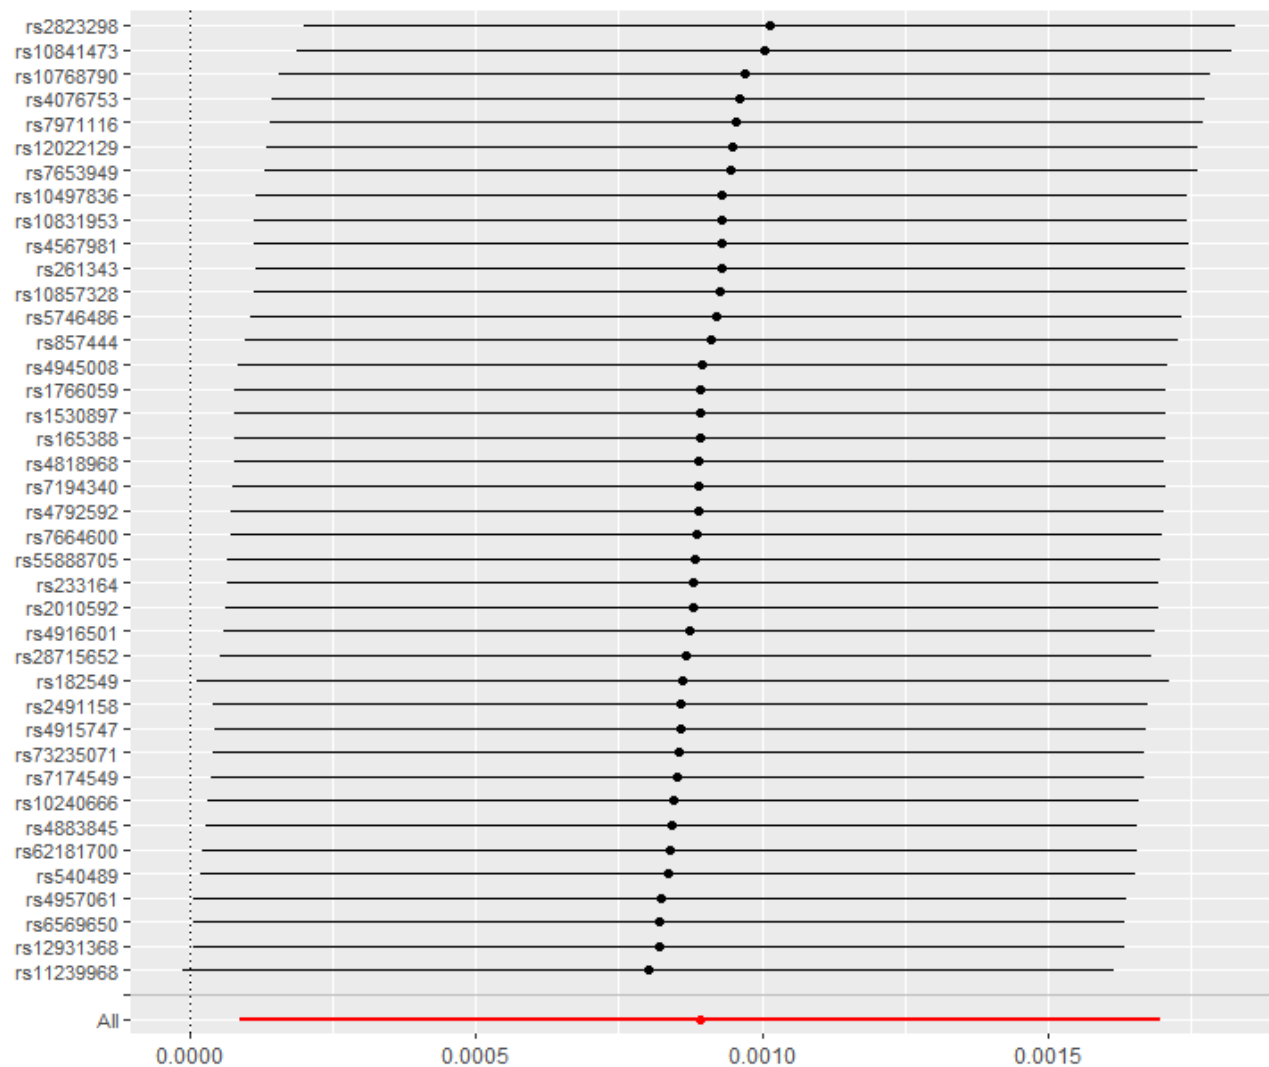

' || id:ebi-a-GCST90016970' on 'Non-cancer illness code, self-reported: malabsorption/coeliac disease || id:ukb-b-8631'

MR Method

- Inverse variance weighted
- MR Egger

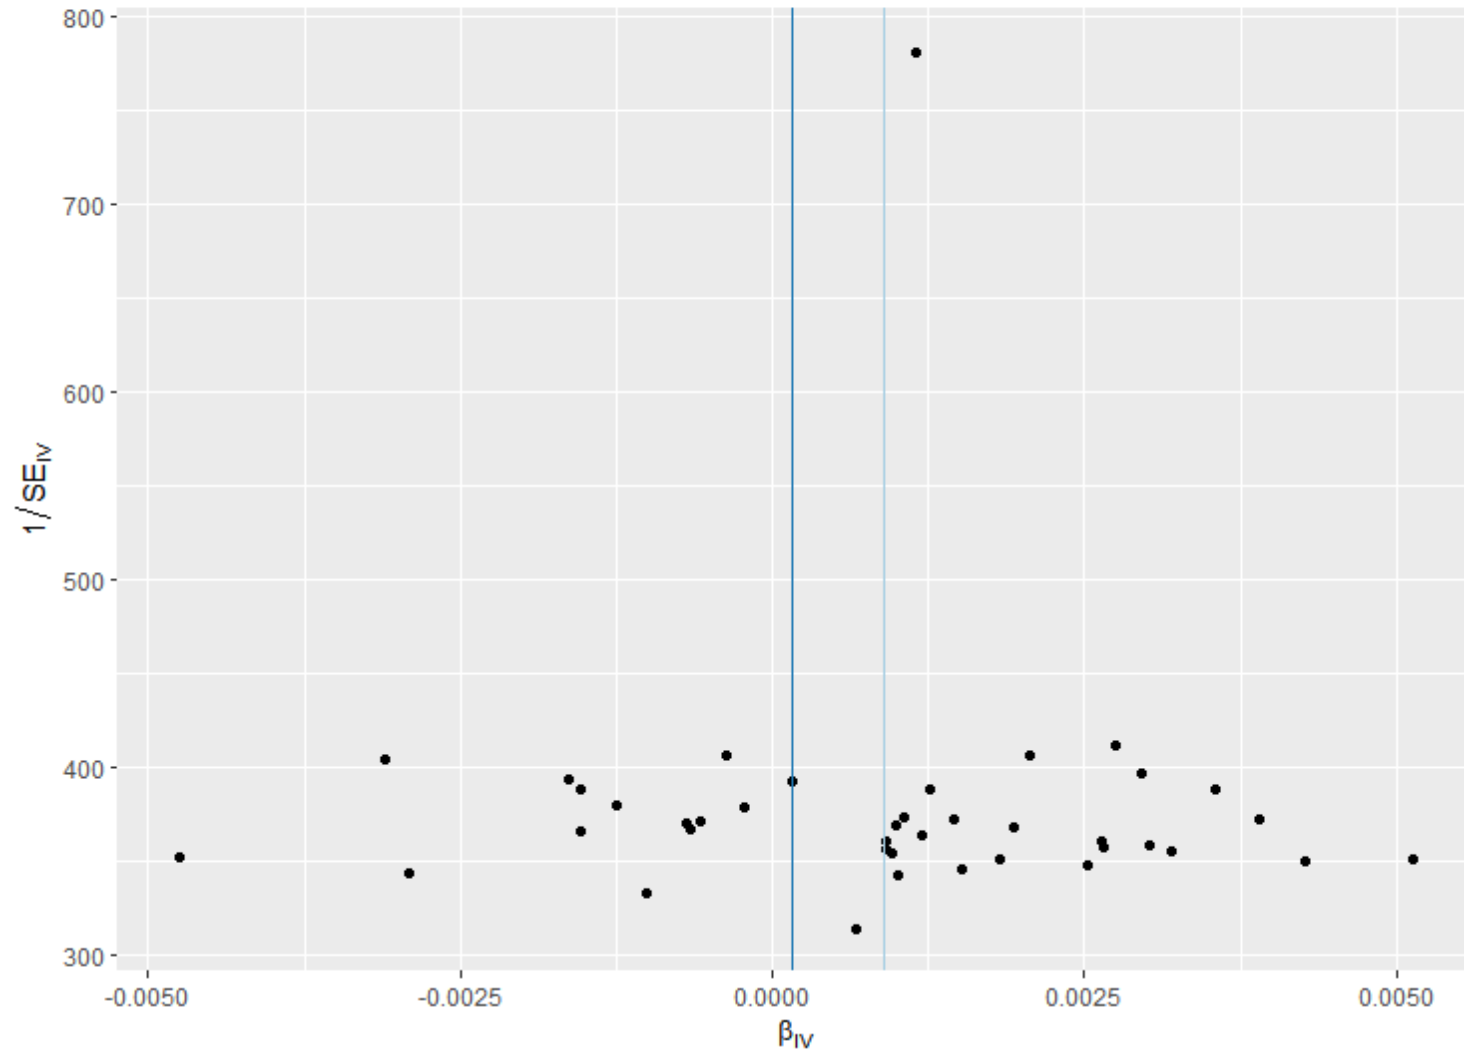

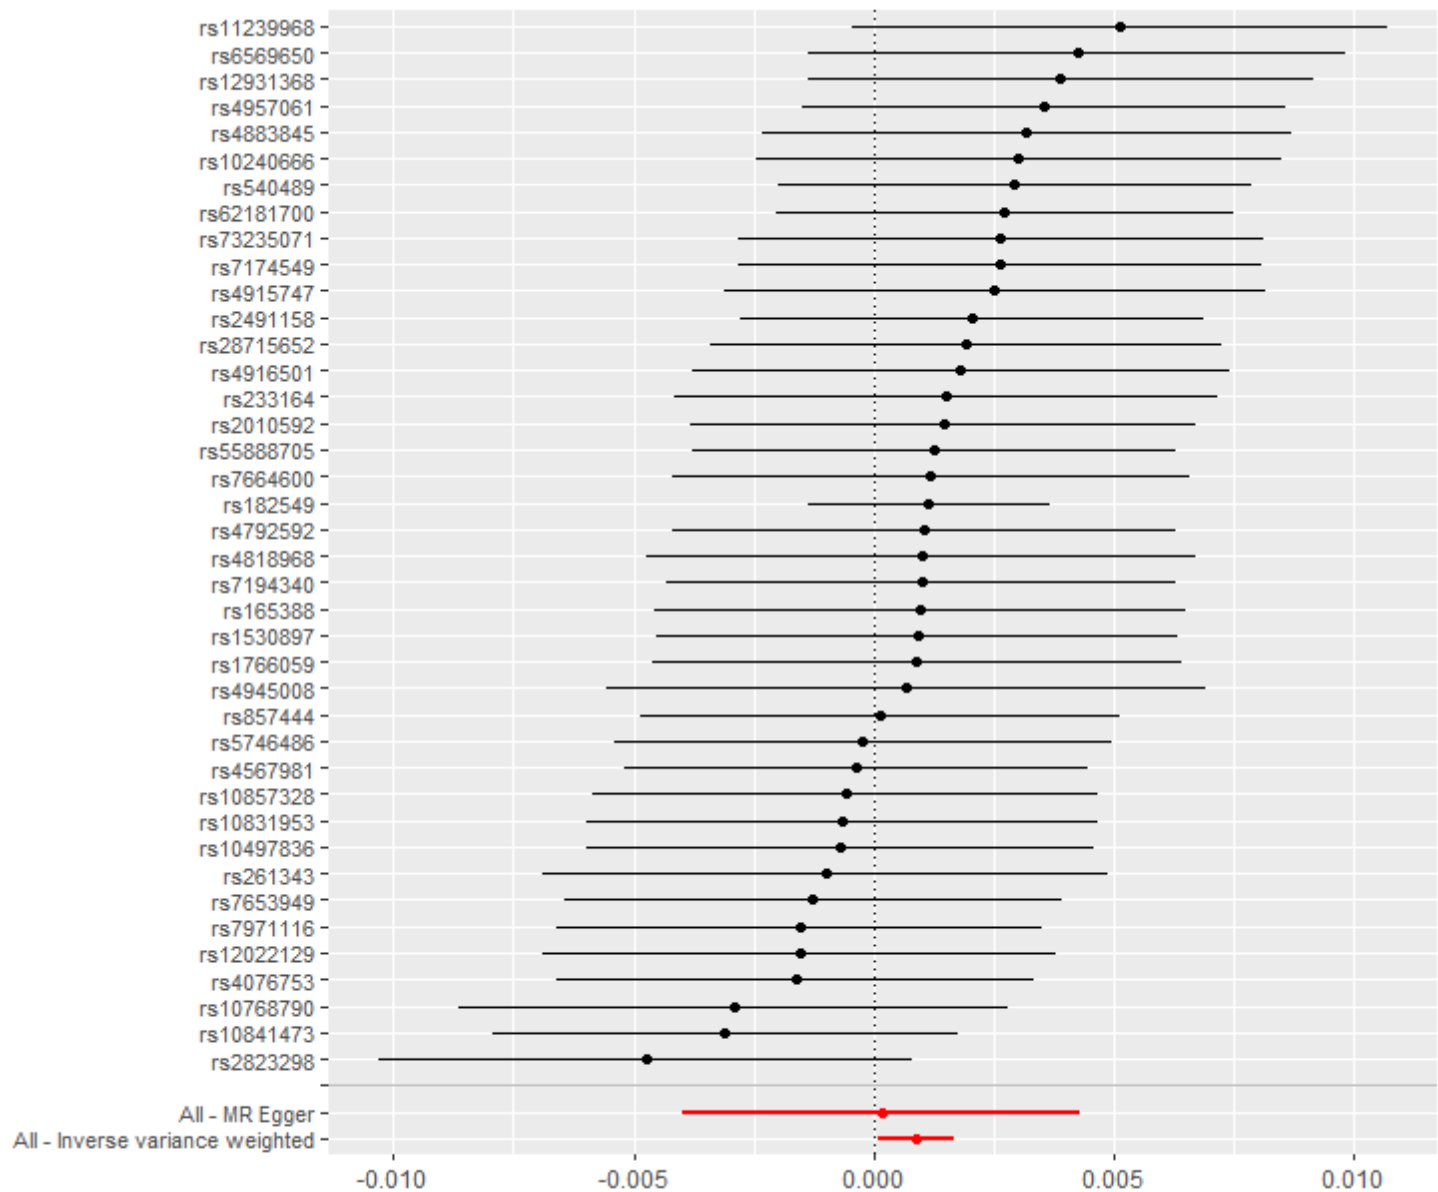

MR effect size for  
' || id:ebi-a-GCST90016970' on 'Non-cancer illness code, self-reported: malabsorption/coeliac disease || id:ukb-b-8631'

Effect on Non-cancer illness code, self-reported: malabsorption/coeliac disease || id:ukb-b-8631

MR Test

- Inverse variance weighted
- MR Egger
- Simple mode
- Weighted median
- Weighted mode

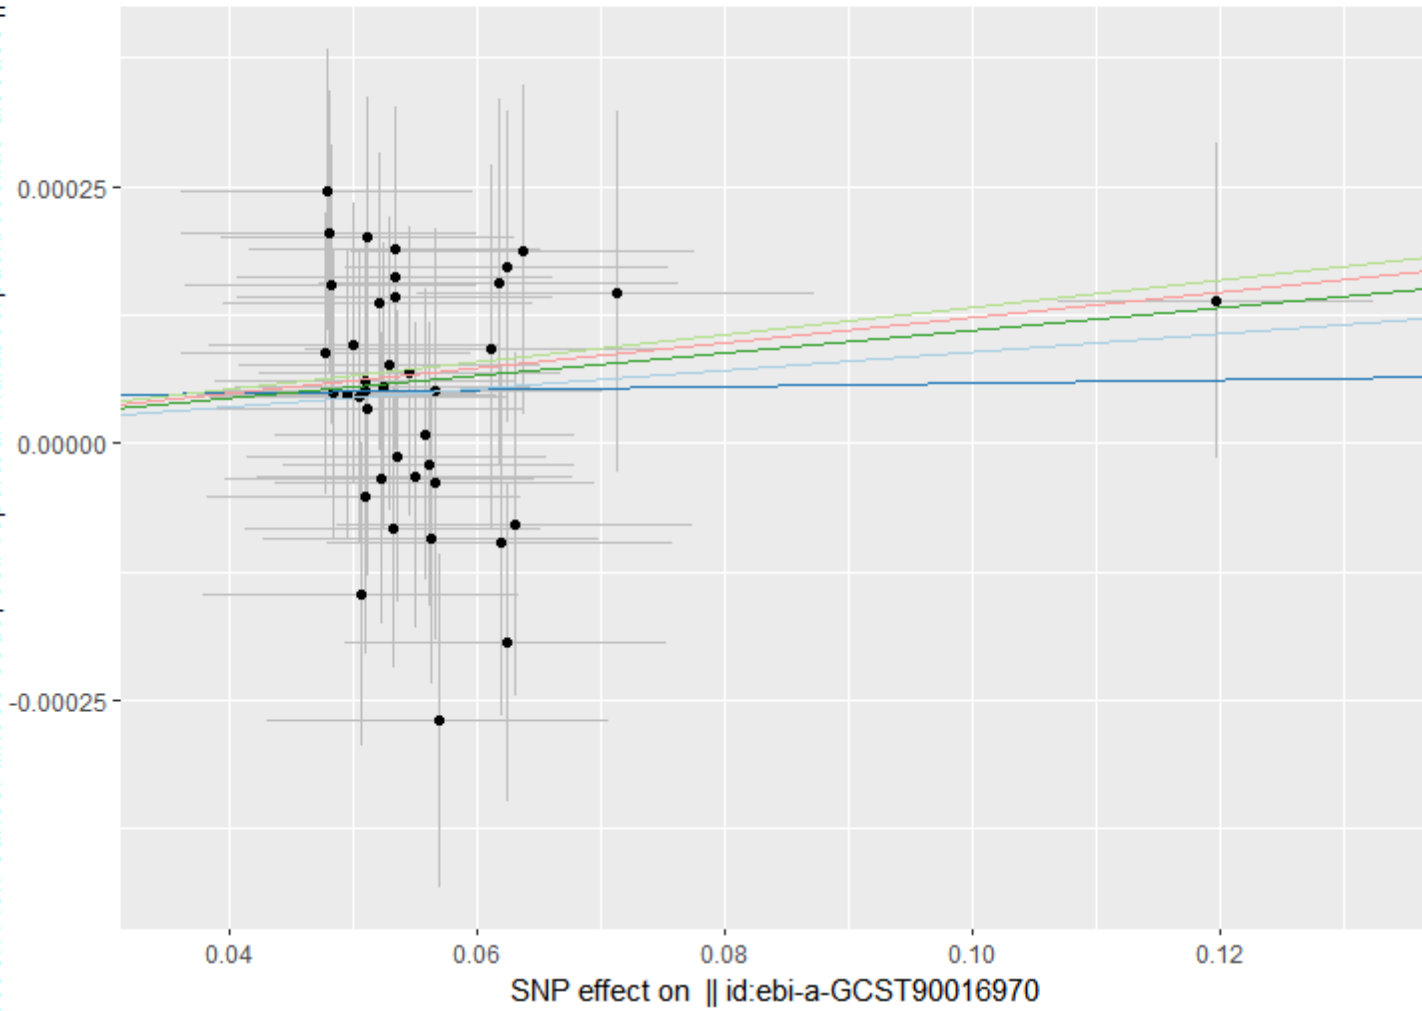

**Figure 148** Leave-one-out analysis, funnel plot, MR effect size and scatter plot for gut microbiota abundance (genus *Butyricicoccus* id.2055) on coeliac disease

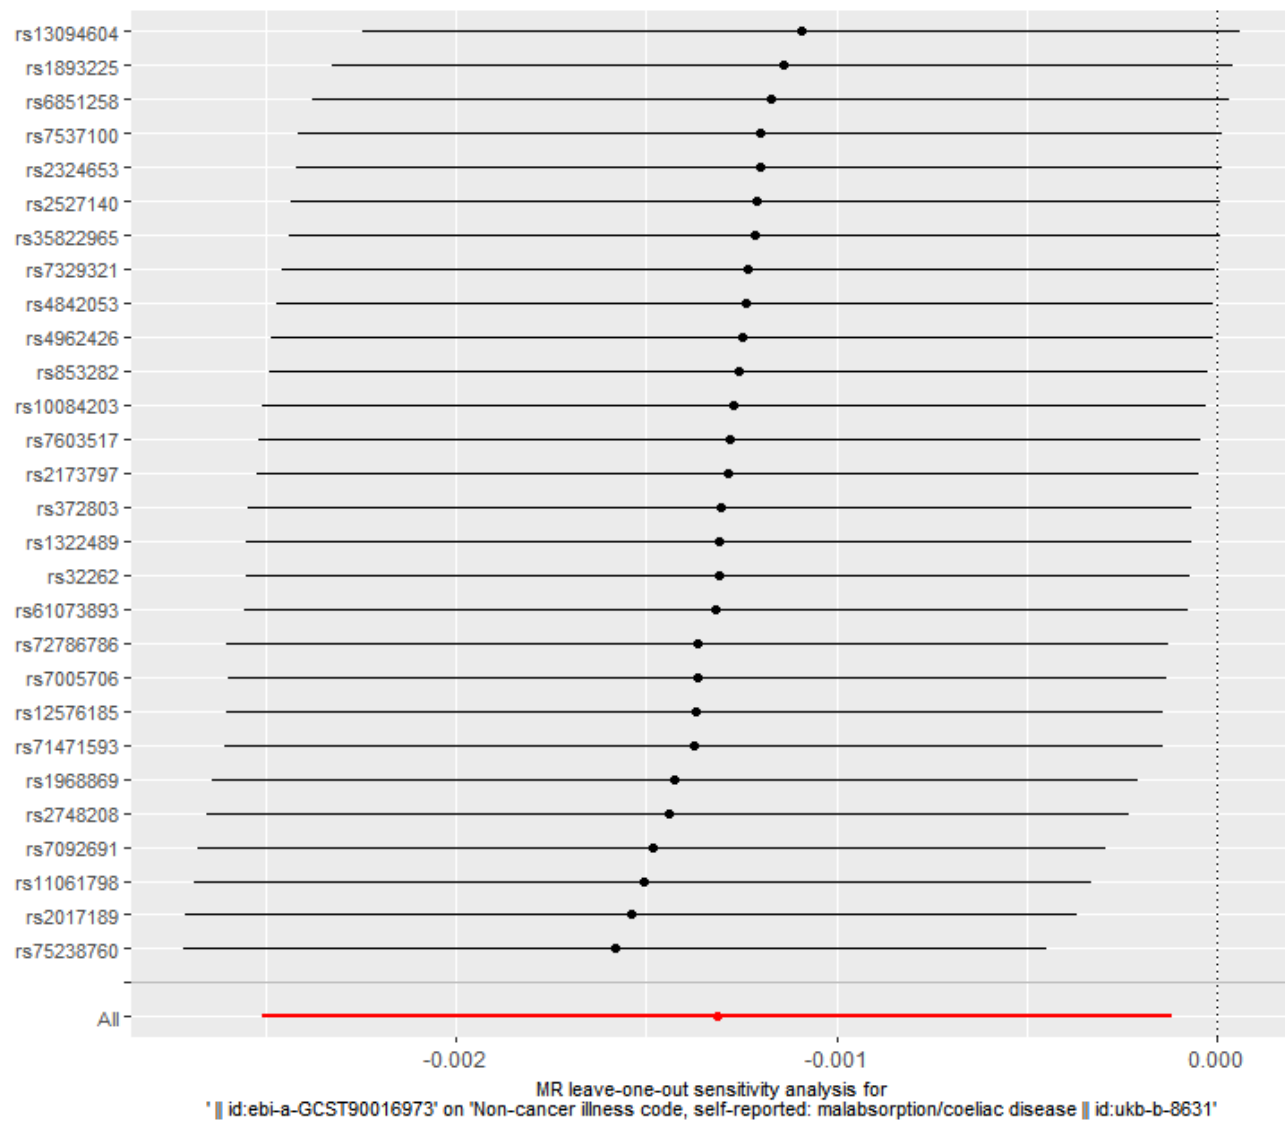

MR Method

- Inverse variance weighted
- MR Egger

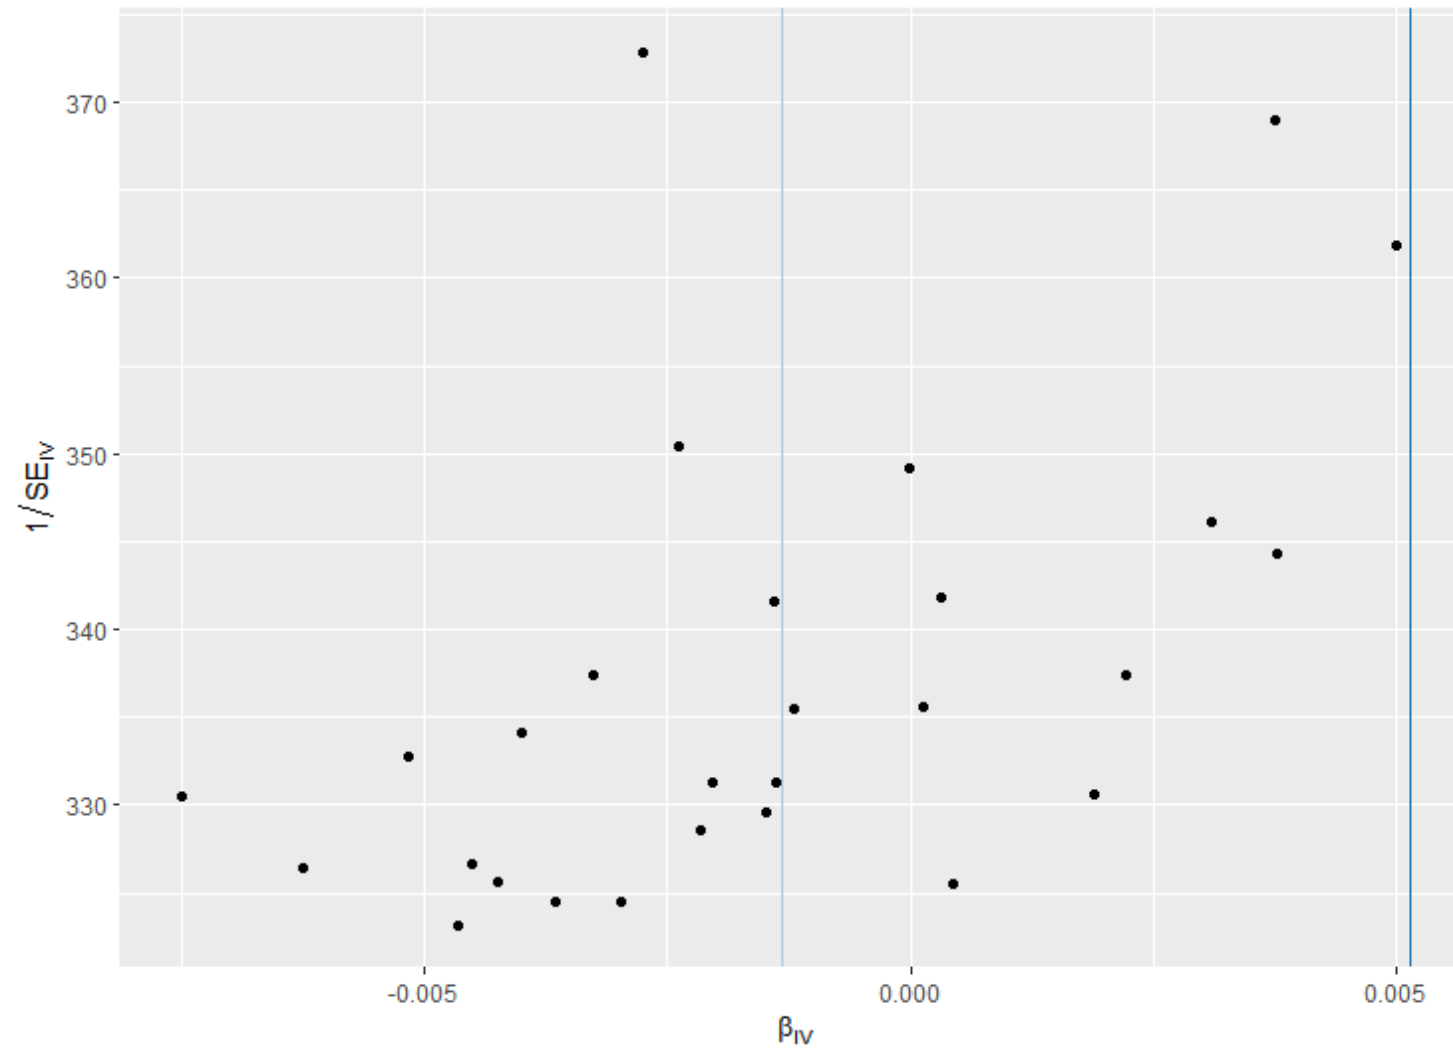

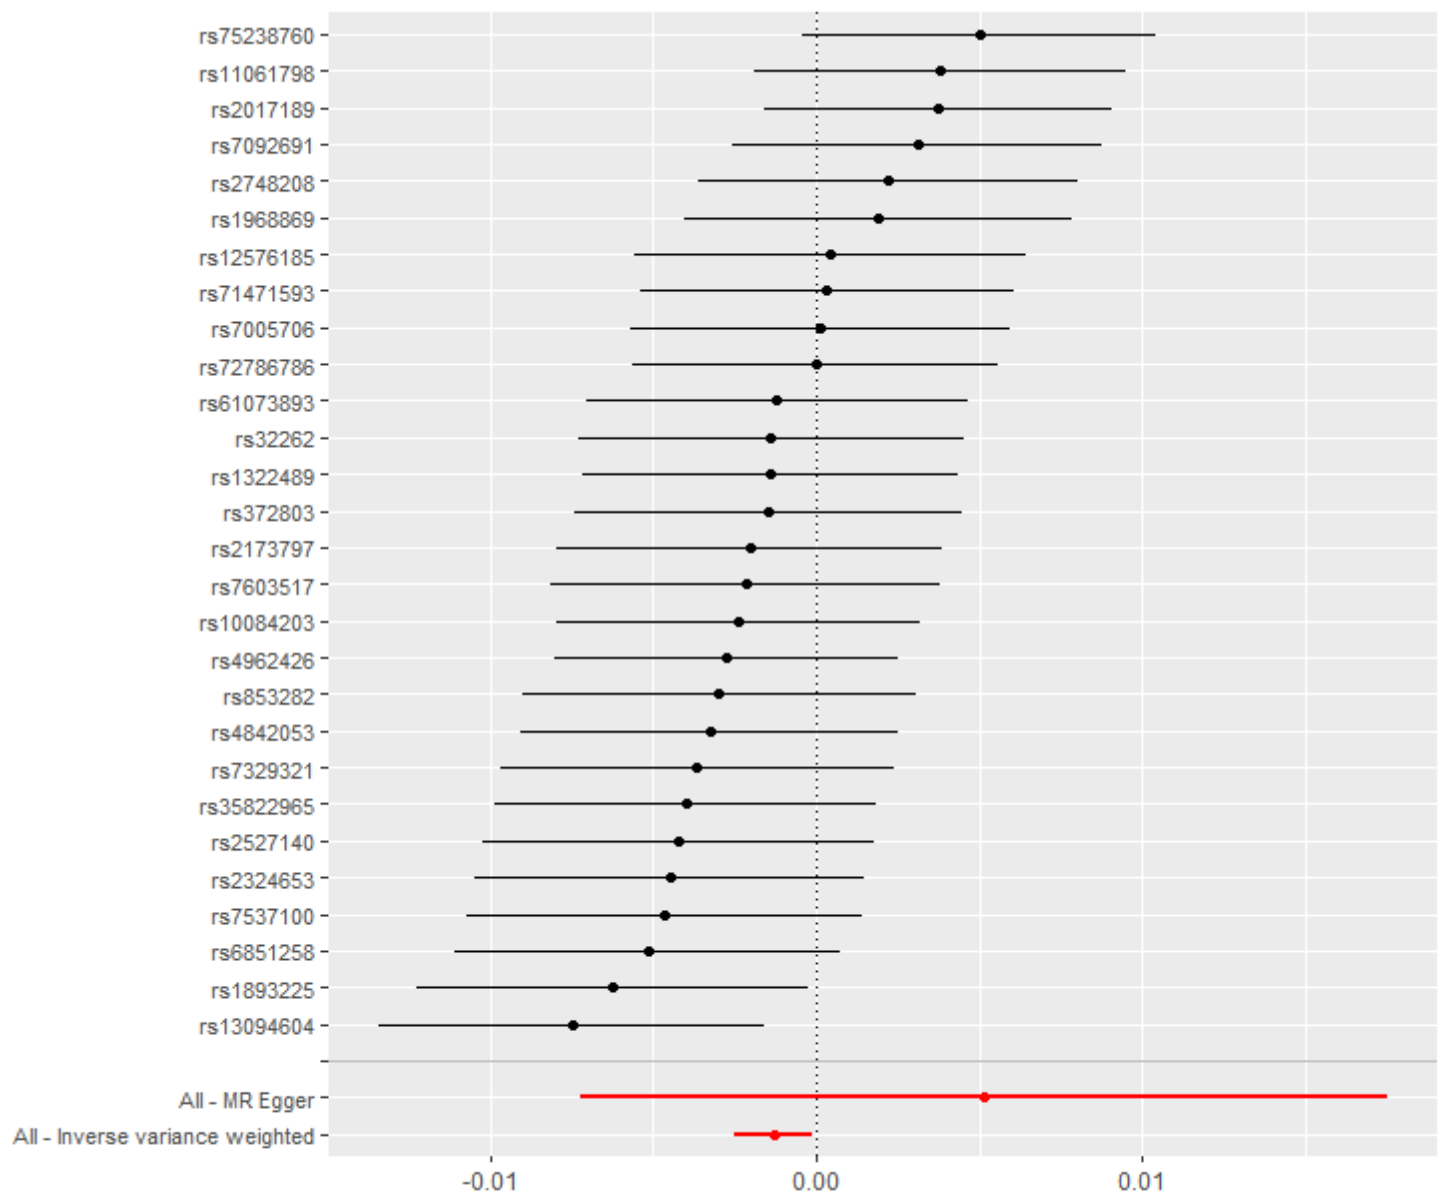

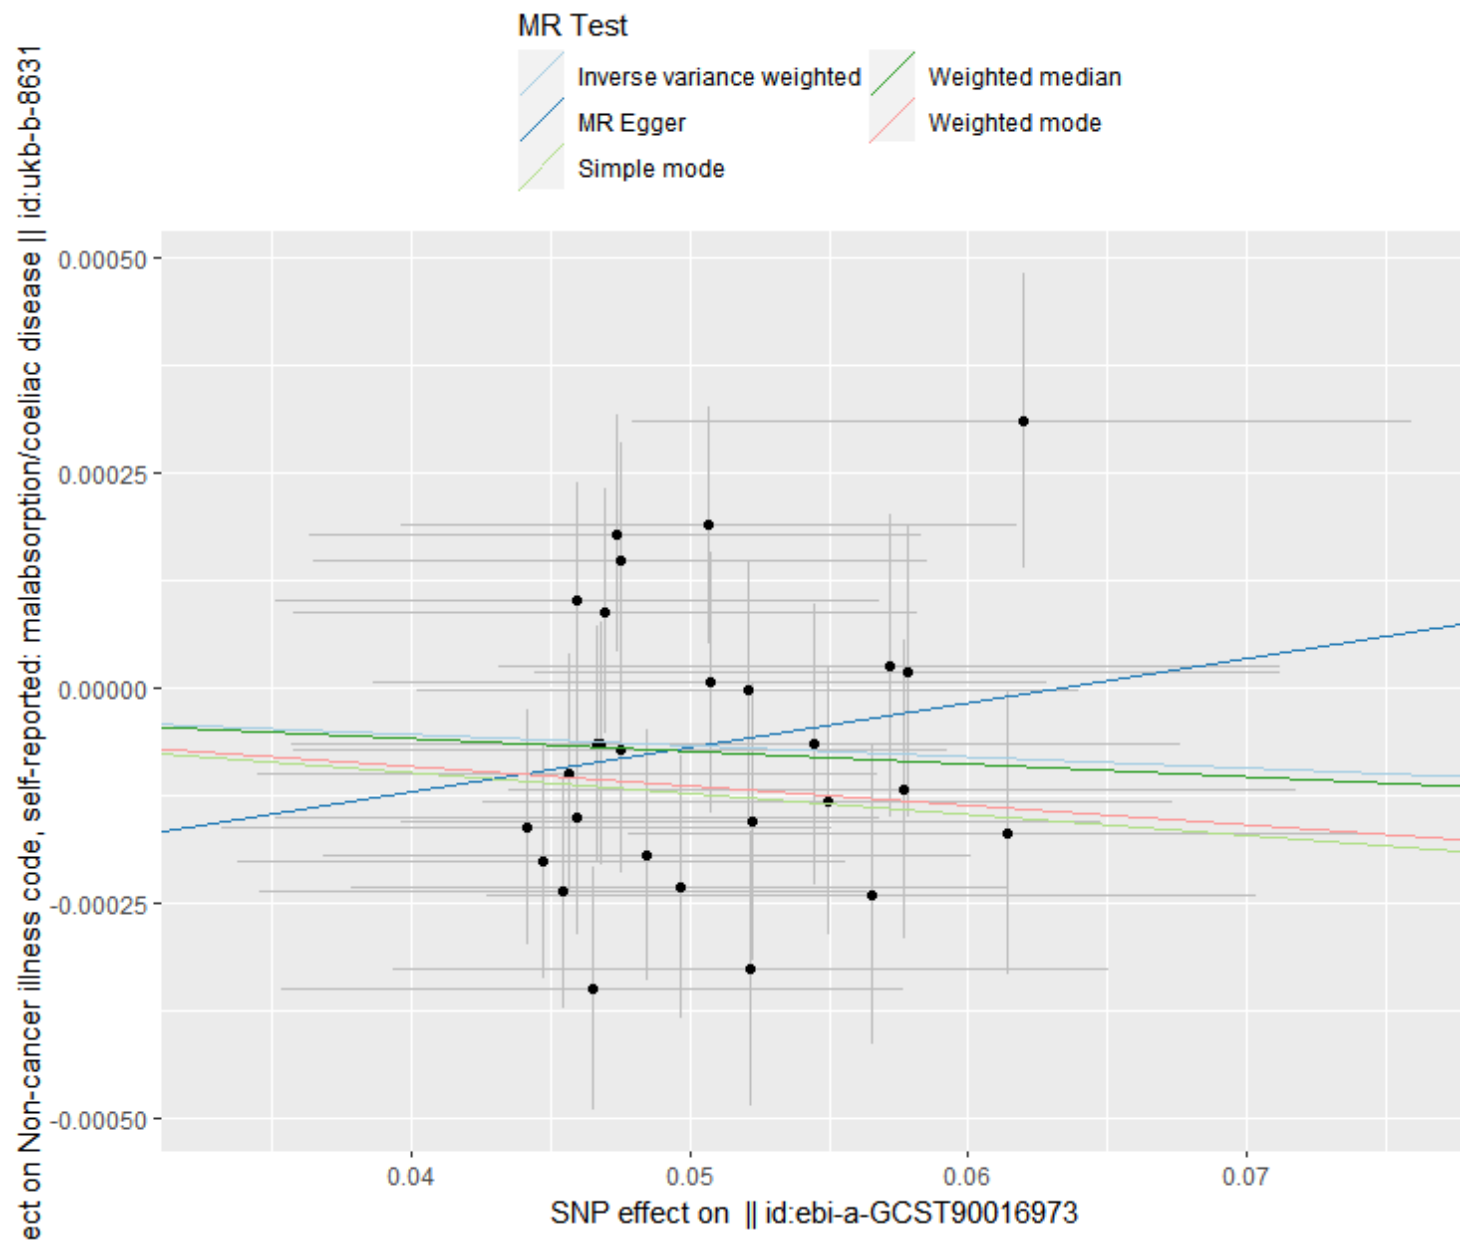



**Figure 149** Leave-one-out analysis, funnel plot, MR effect size and scatter plot for gut microbiota abundance (class Actinobacteria id.419) on nonalcoholic fatty liver disease

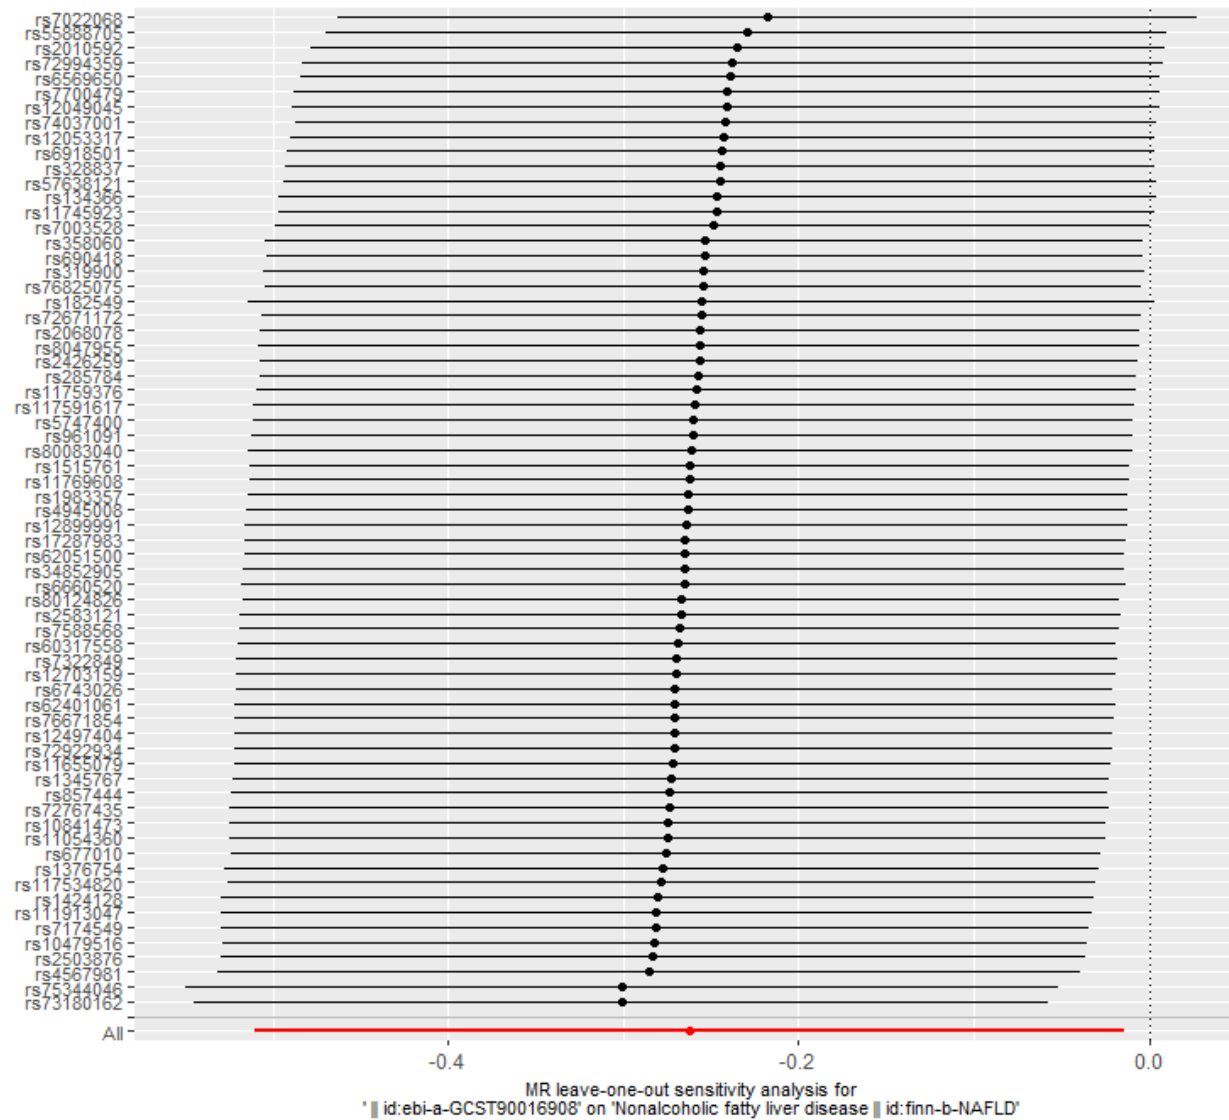

MR Method

- Inverse variance weighted
- MR Egger

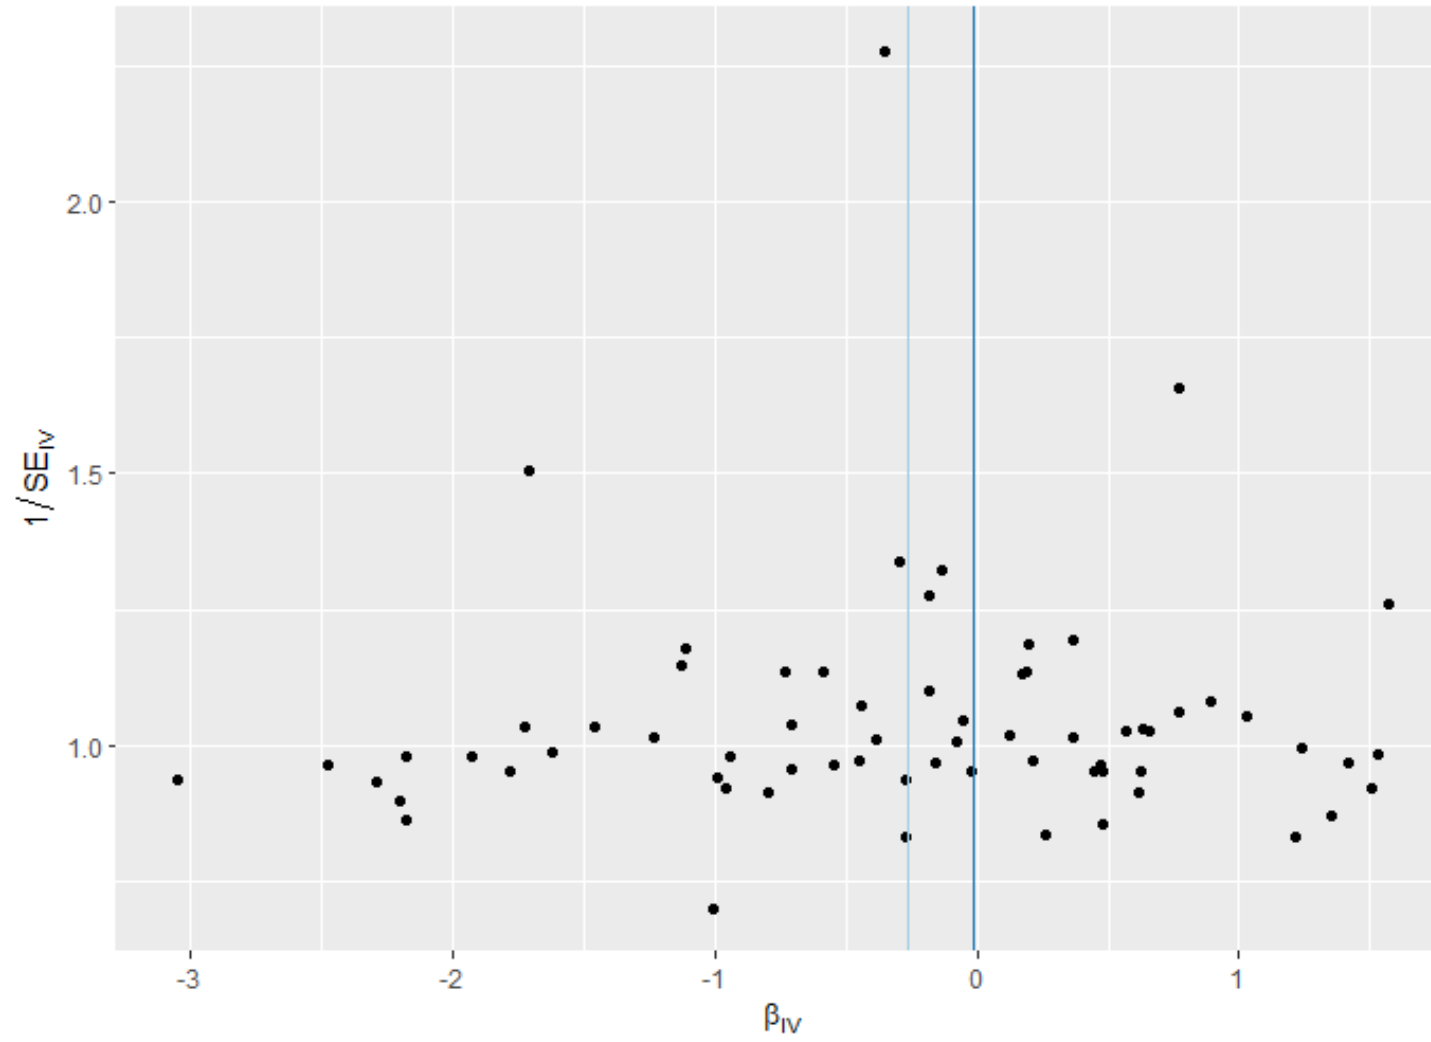

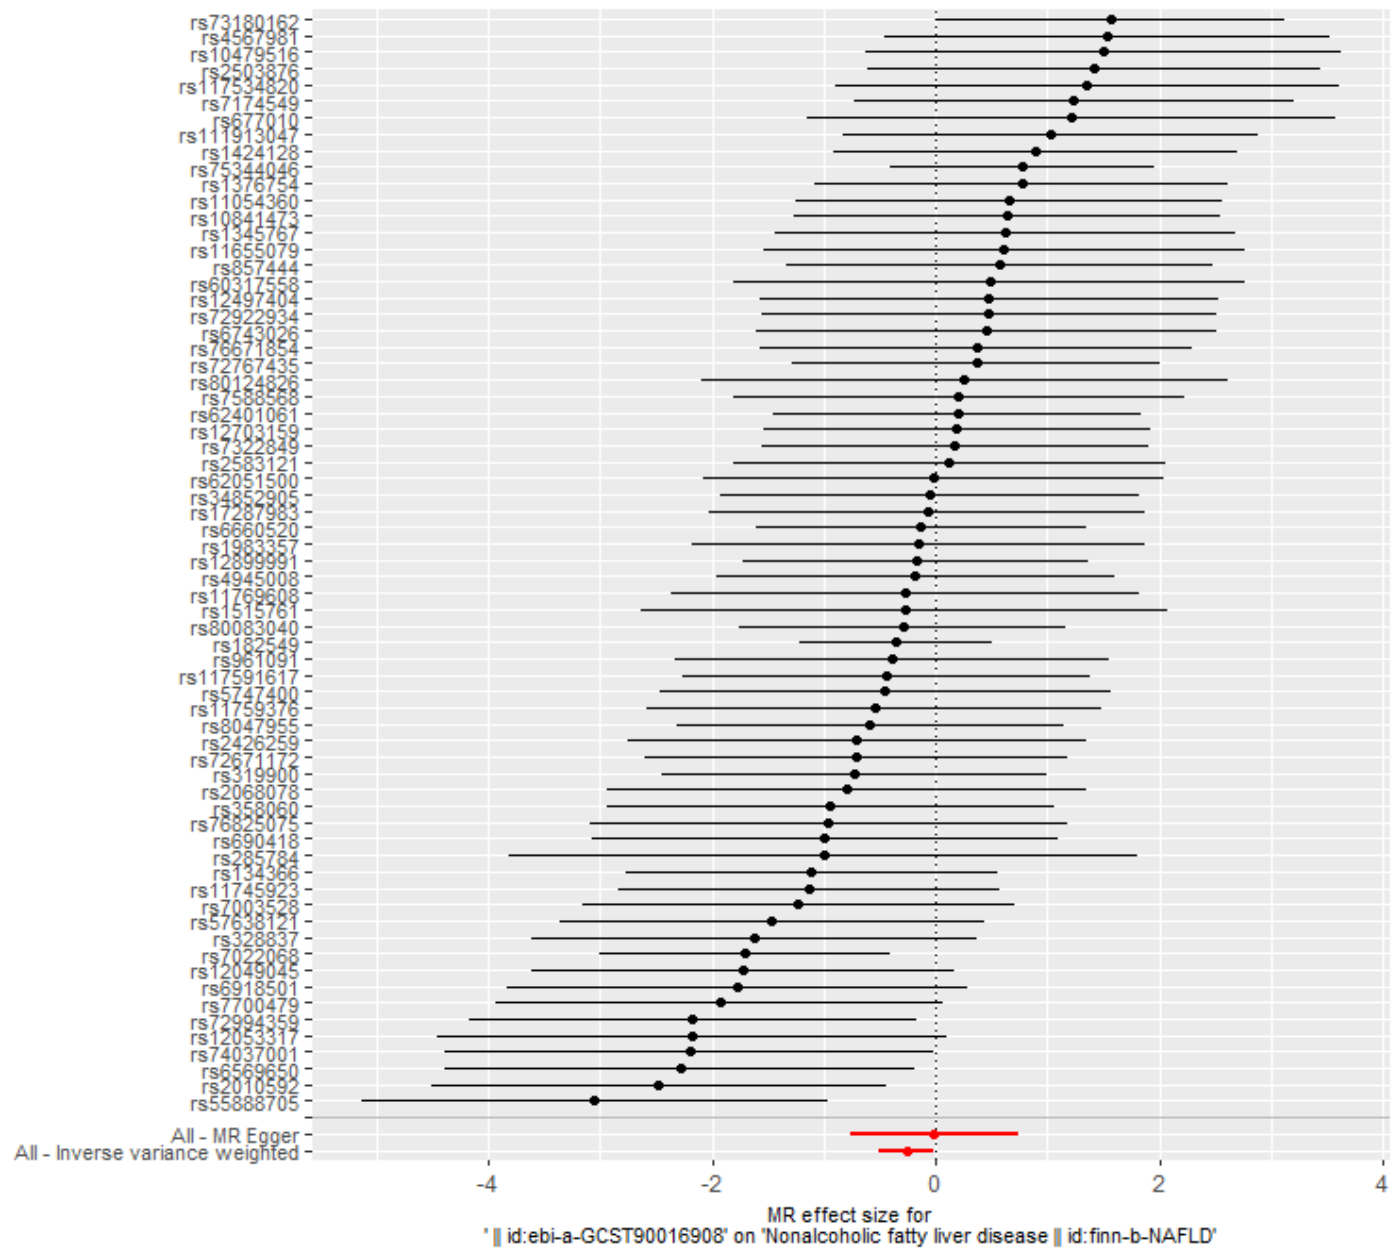

MR Test

- Inverse variance weighted
- MR Egger
- Simple mode
- Weighted median
- Weighted mode

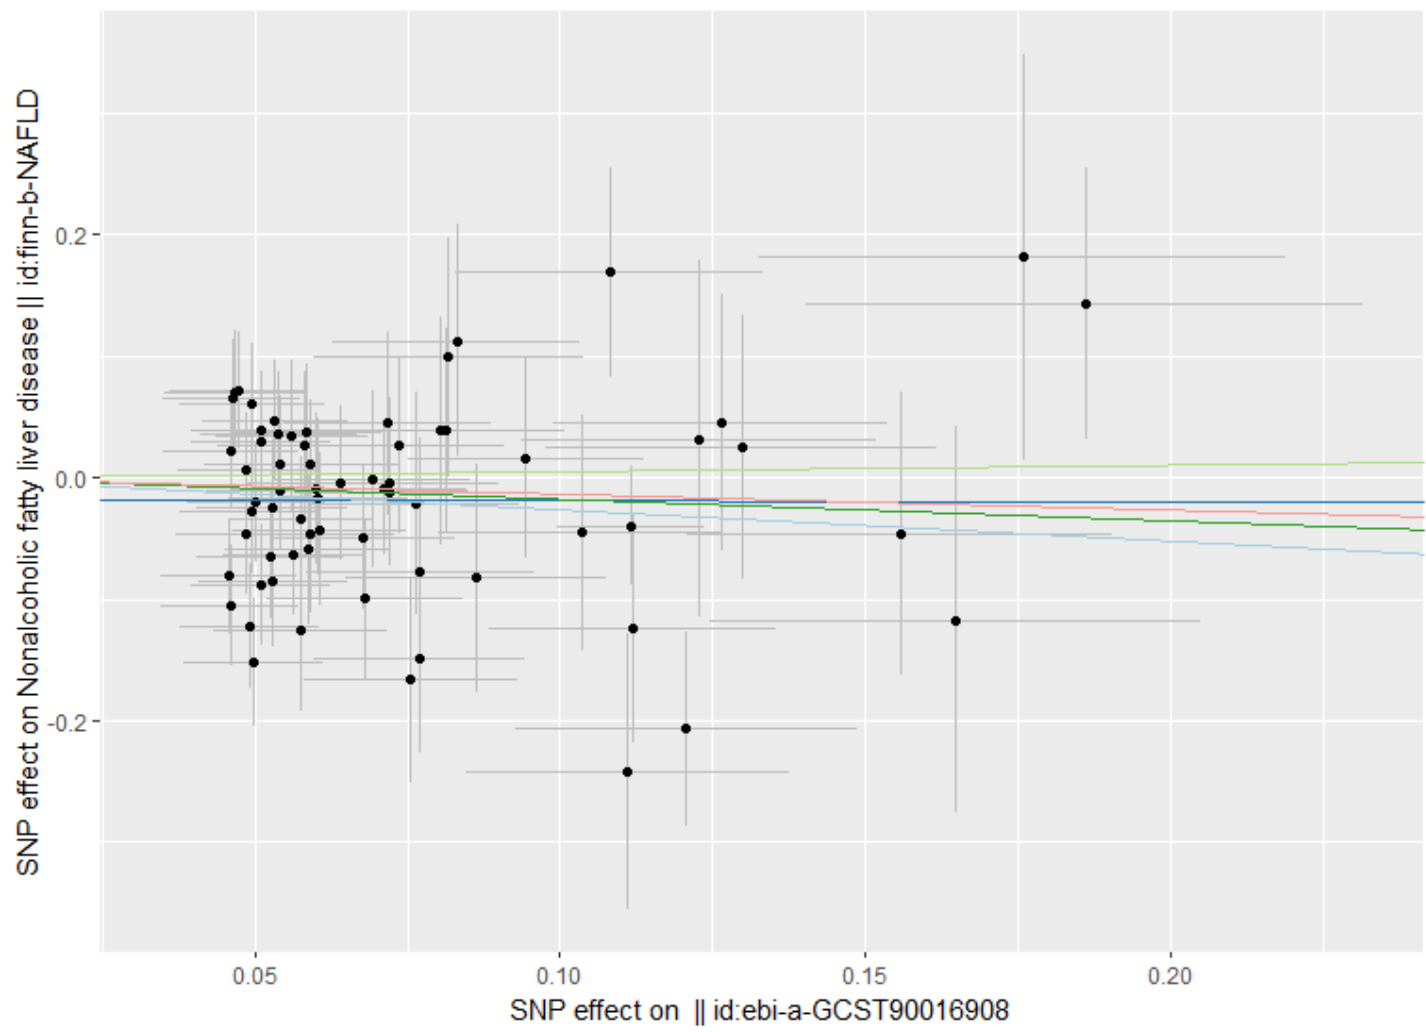

**Figure 150** Leave-one-out analysis, funnel plot, MR effect size and scatter plot for gut microbiota abundance (family Alcaligenaceae id.2875) on nonalcoholic fatty liver disease

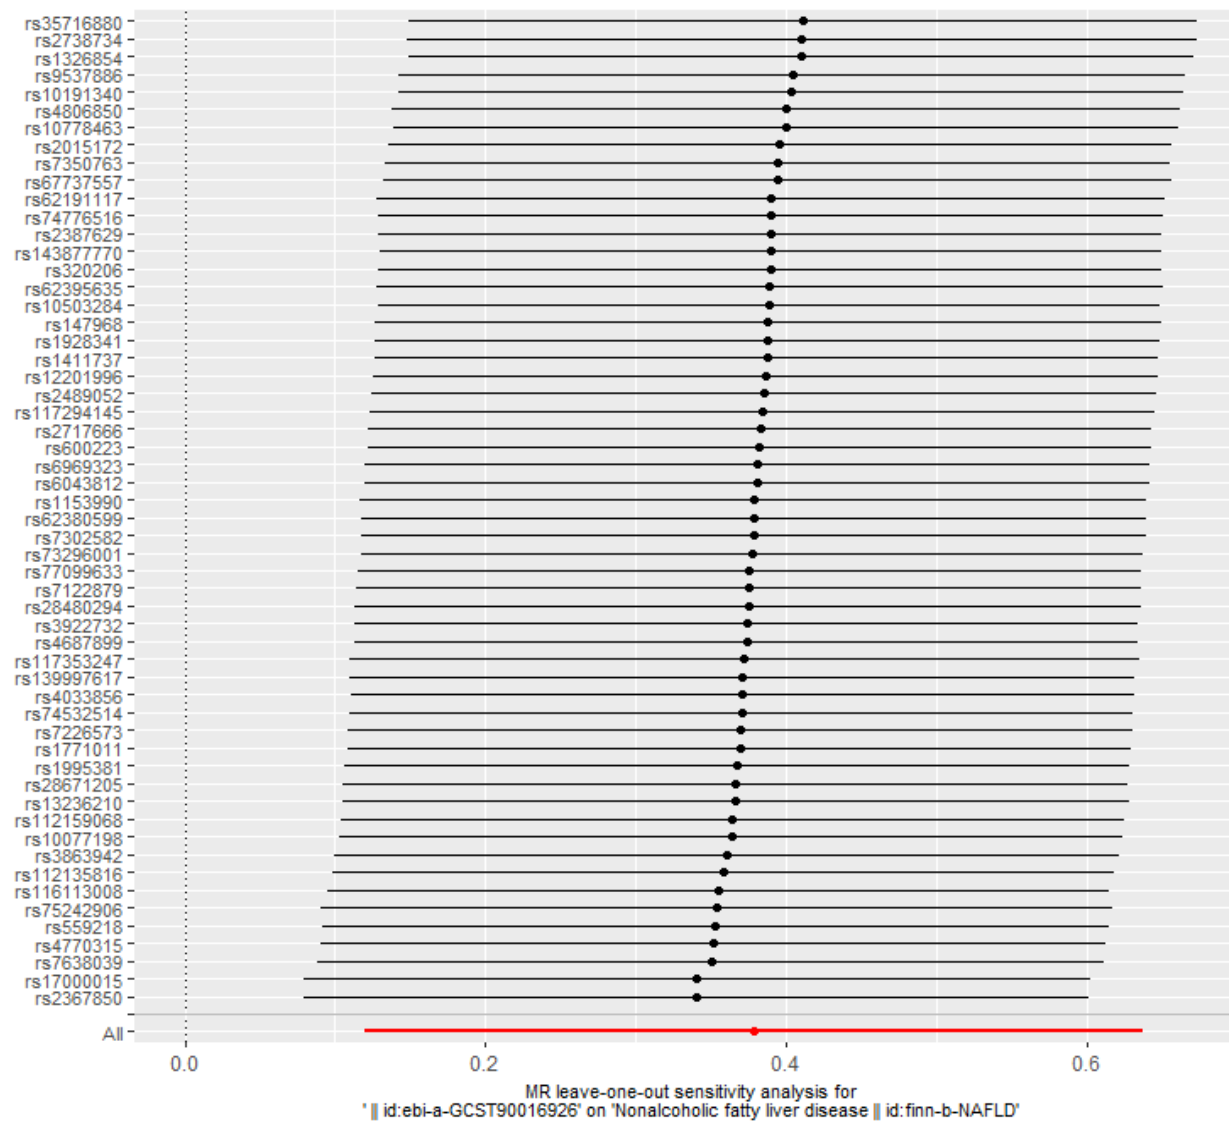

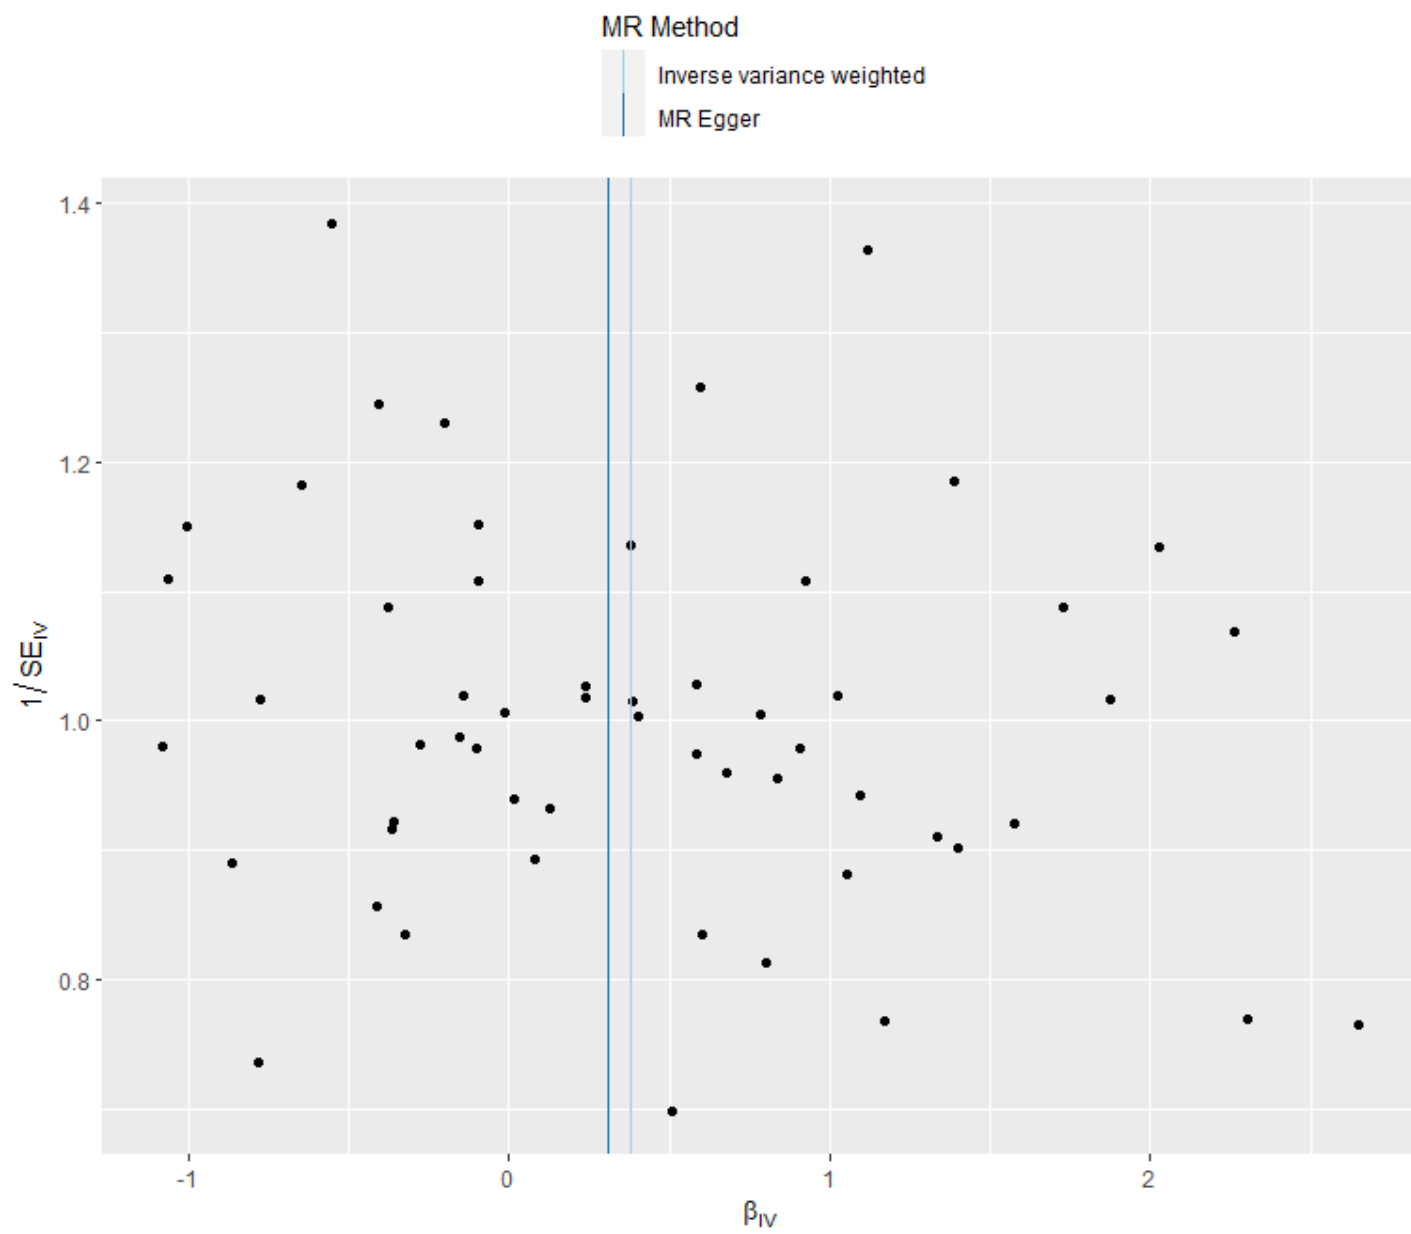

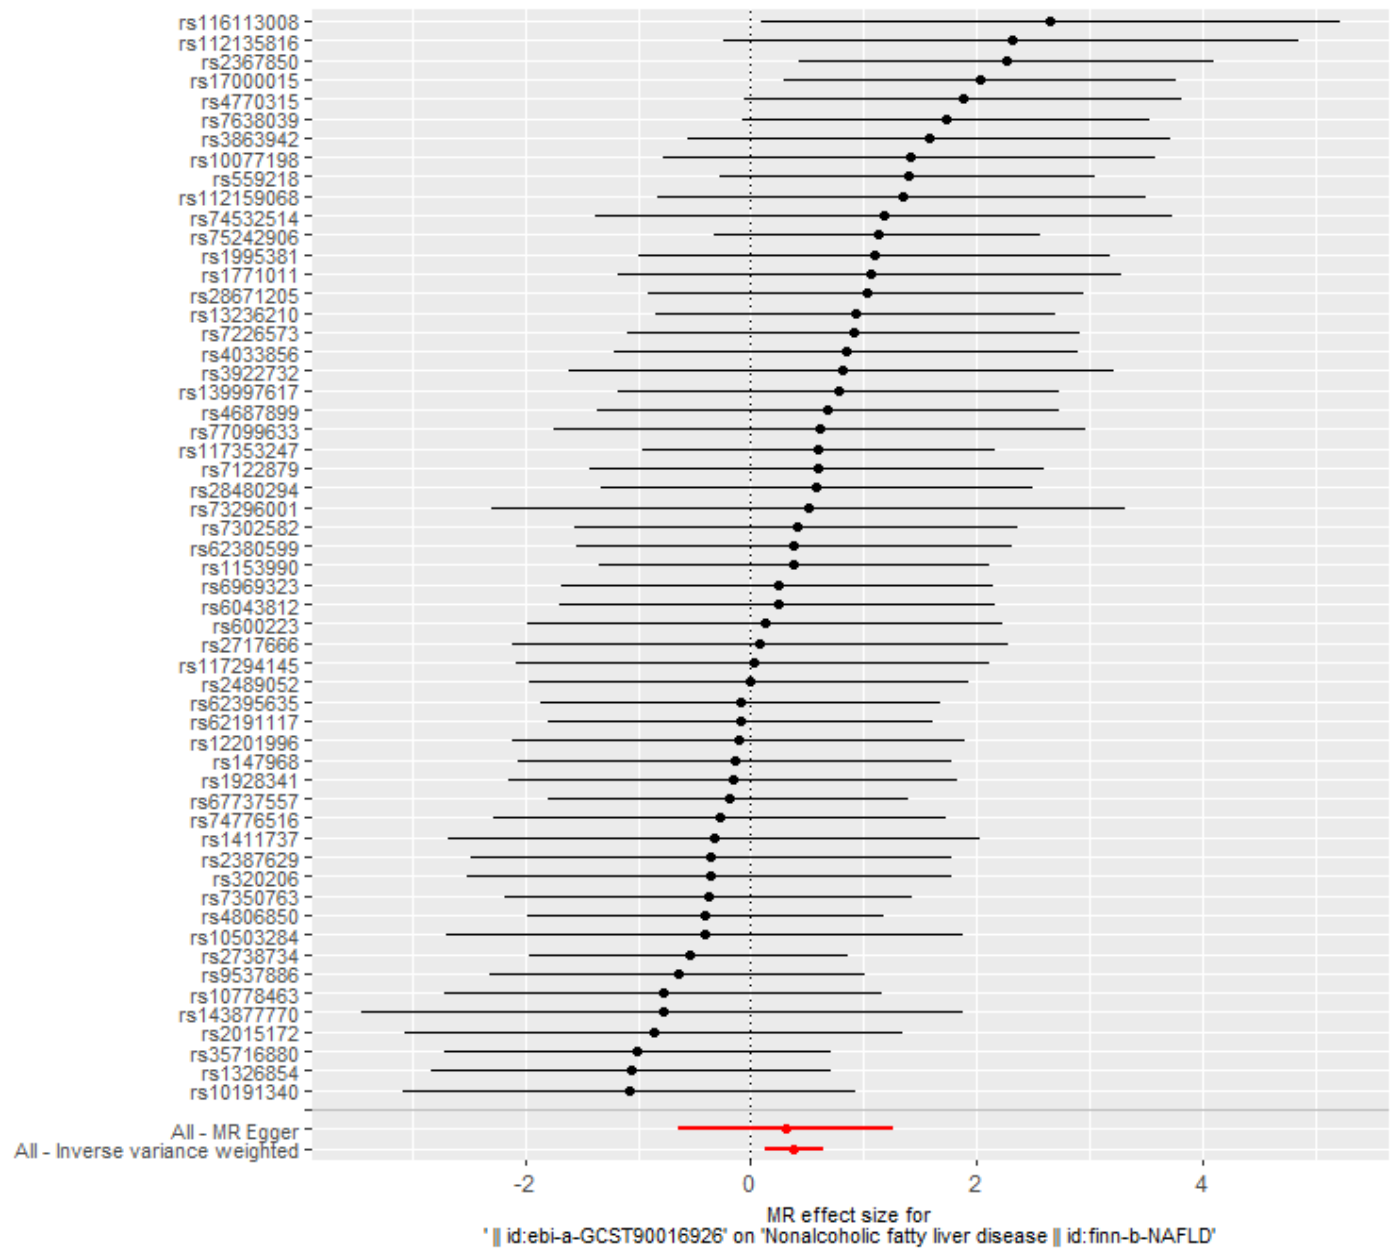

MR Test

- Inverse variance weighted
- MR Egger
- Simple mode
- Weighted median
- Weighted mode

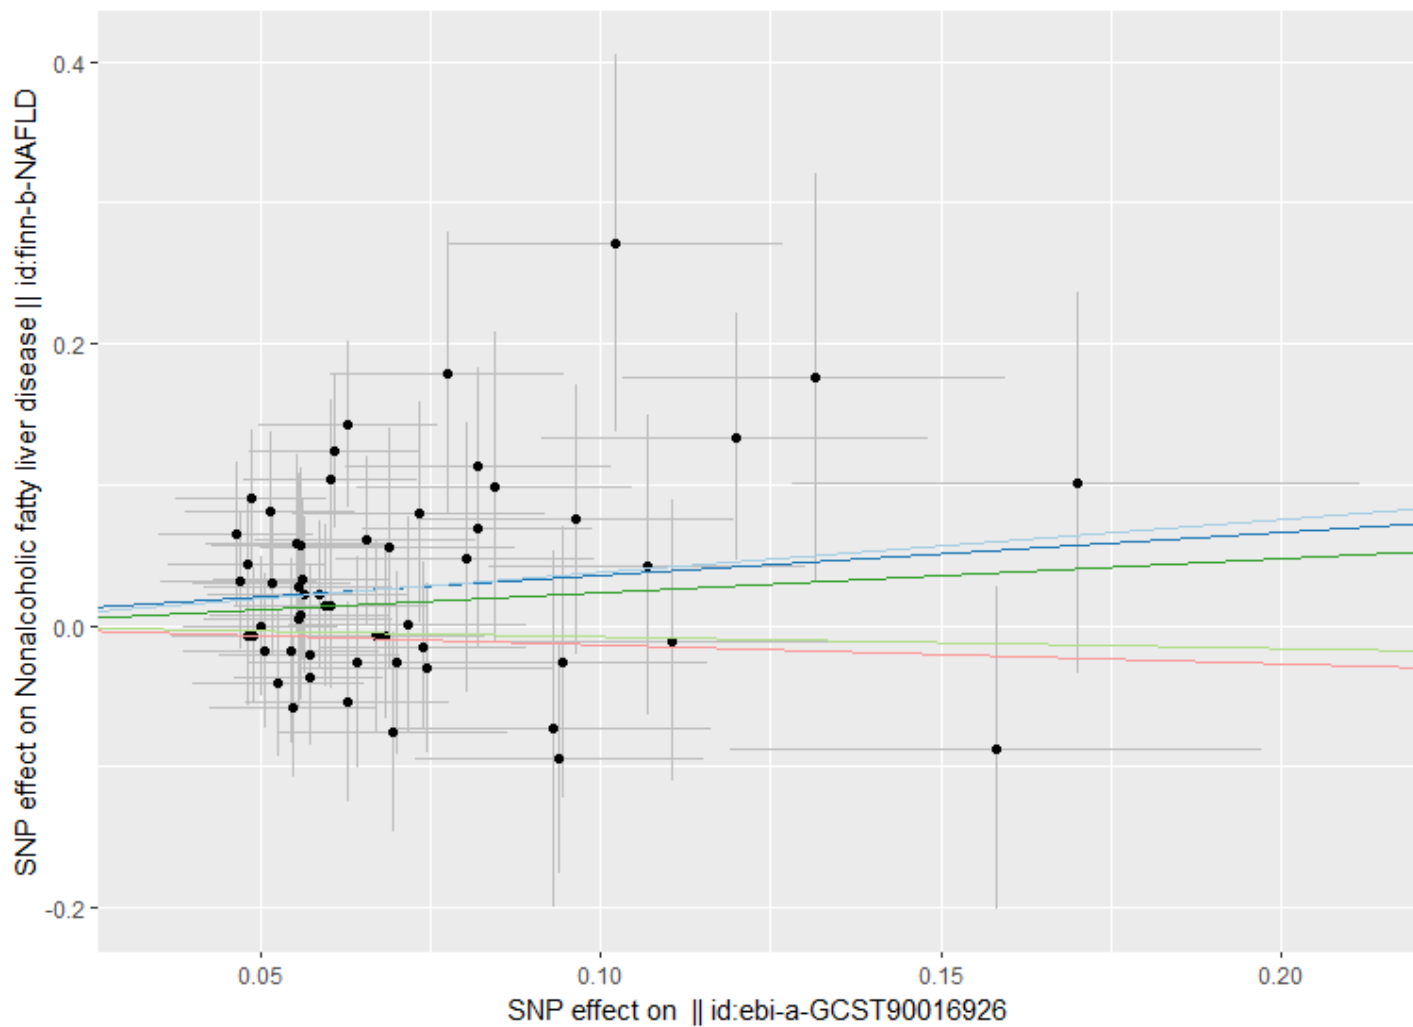



**Figure 151** Leave-one-out analysis, funnel plot, MR effect size and scatter plot for gut microbiota abundance (unknown family id.1000006161) on nonalcoholic fatty liver disease

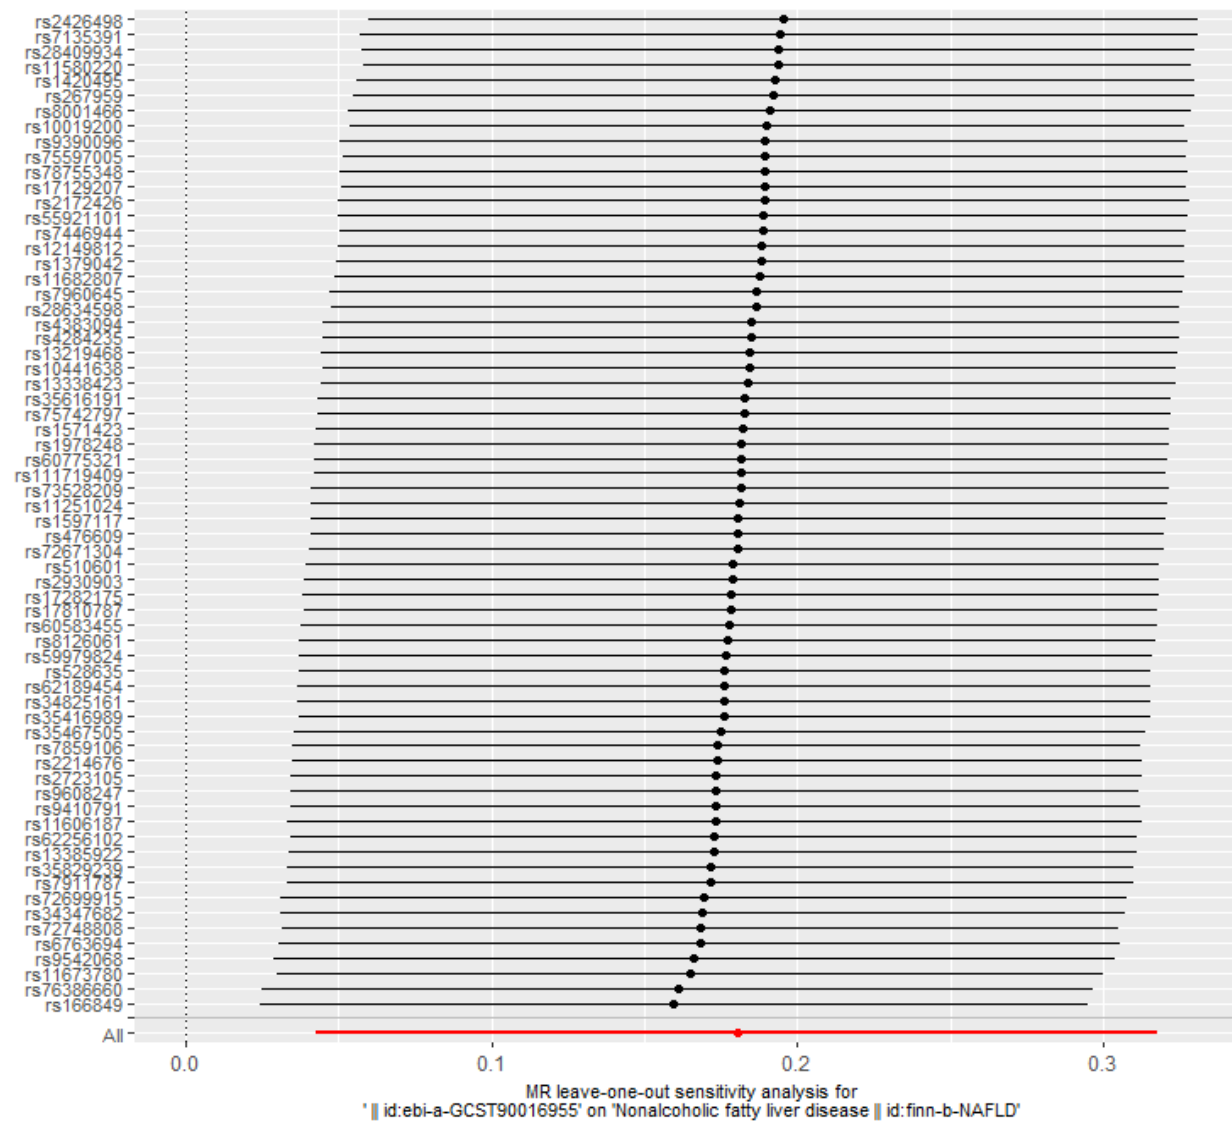

MR Method

- Inverse variance weighted
- MR Egger

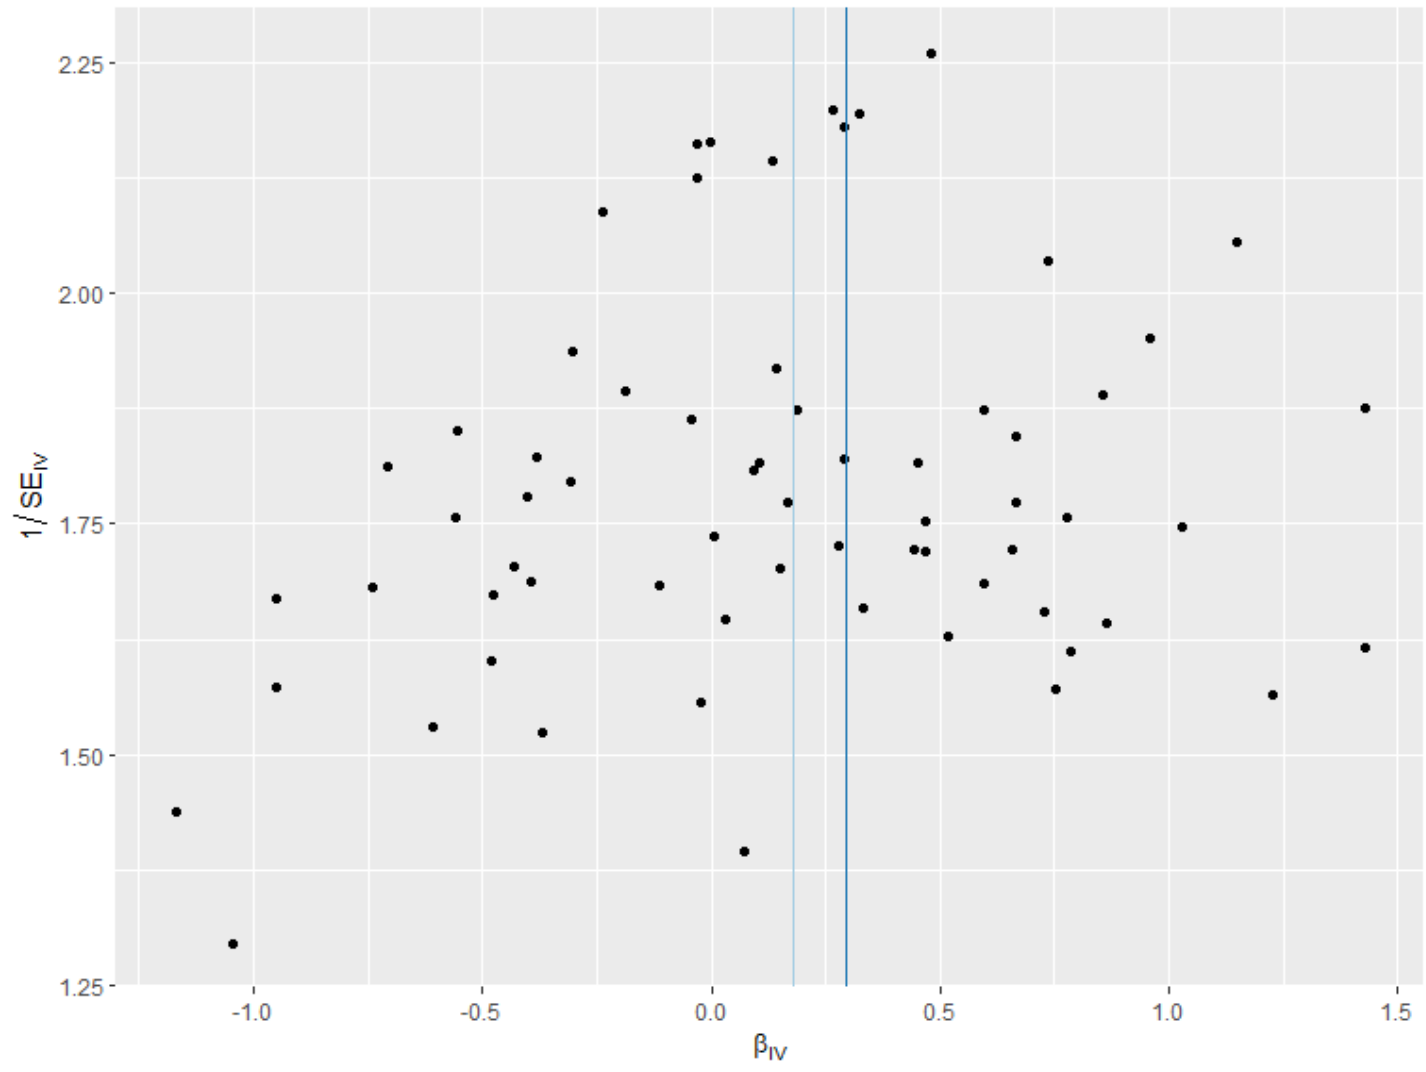

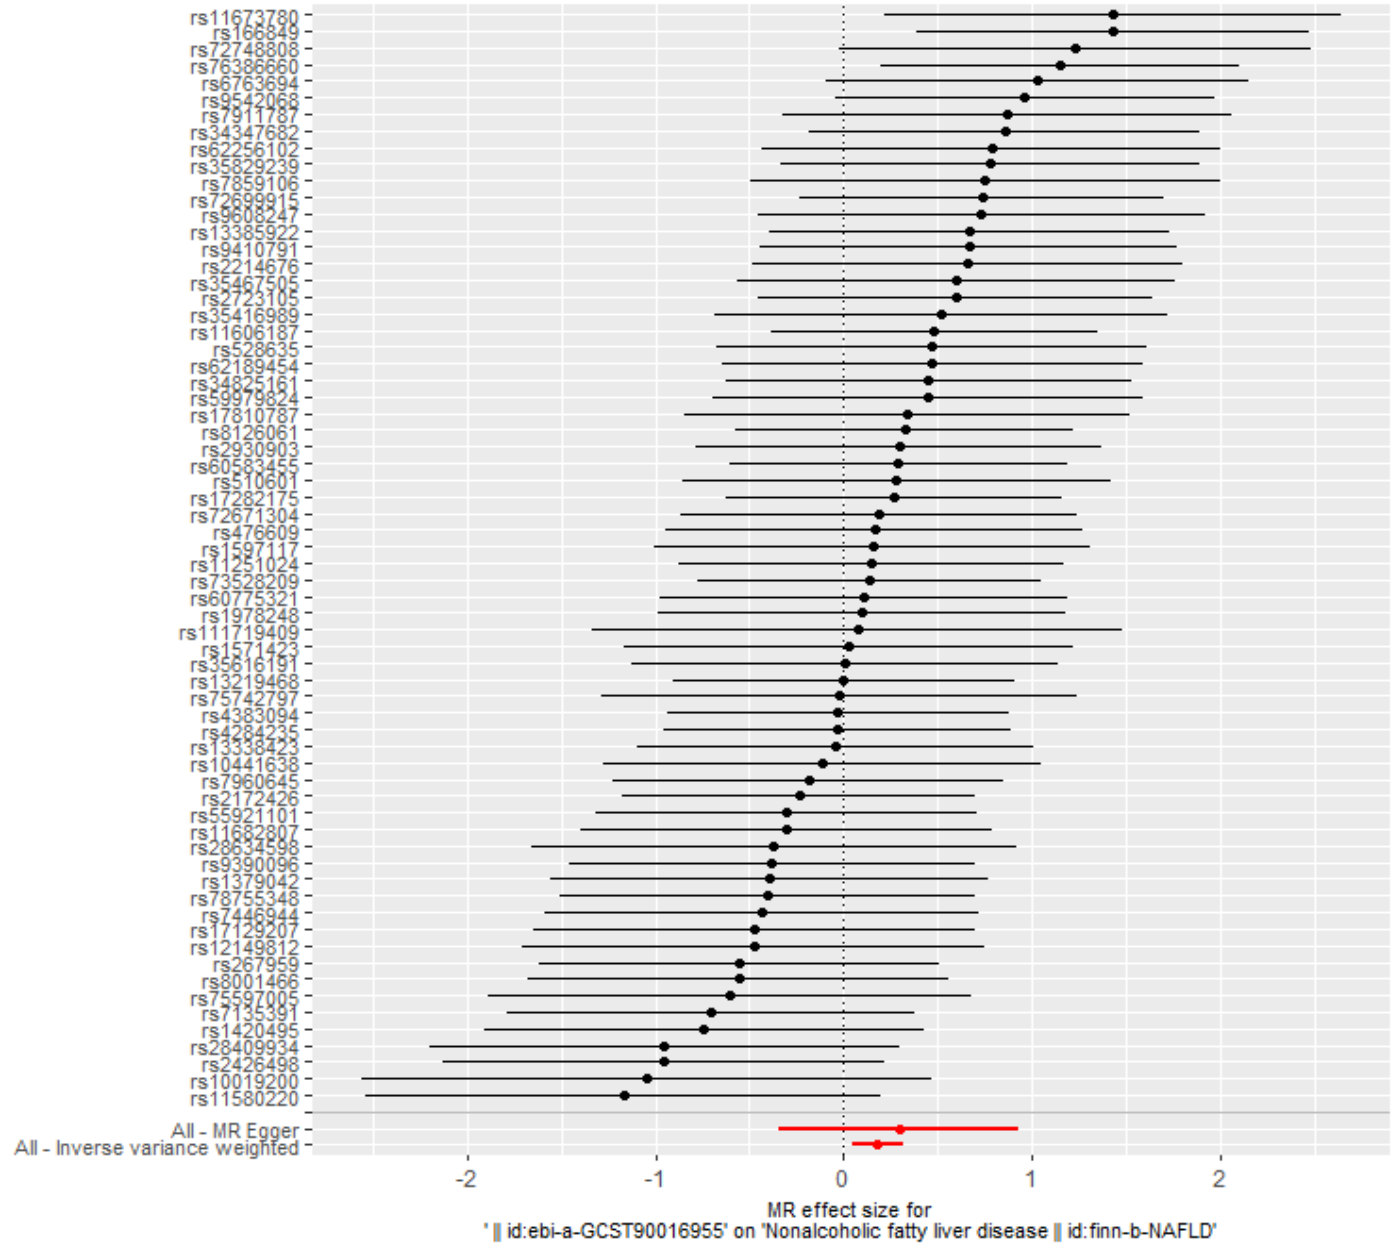

MR Test

- Inverse variance weighted
- MR Egger
- Simple mode
- Weighted median
- Weighted mode

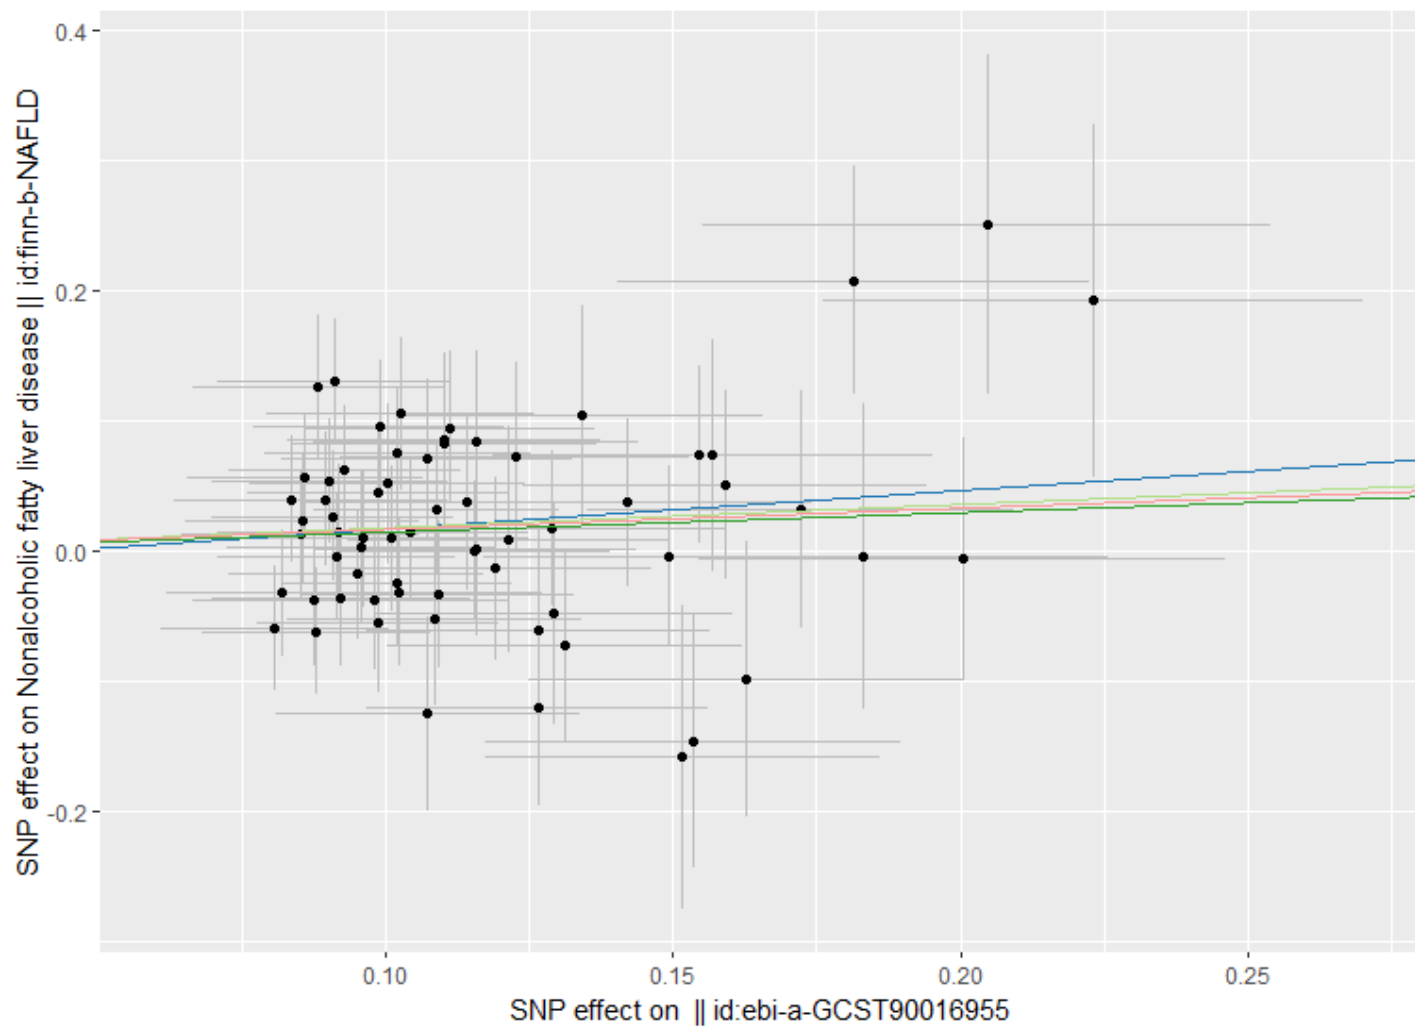

**Figure 152** Leave-one-out analysis, funnel plot, MR effect size and scatter plot for gut microbiota abundance (genus *Alloprevotella* id.961) on nonalcoholic fatty liver disease

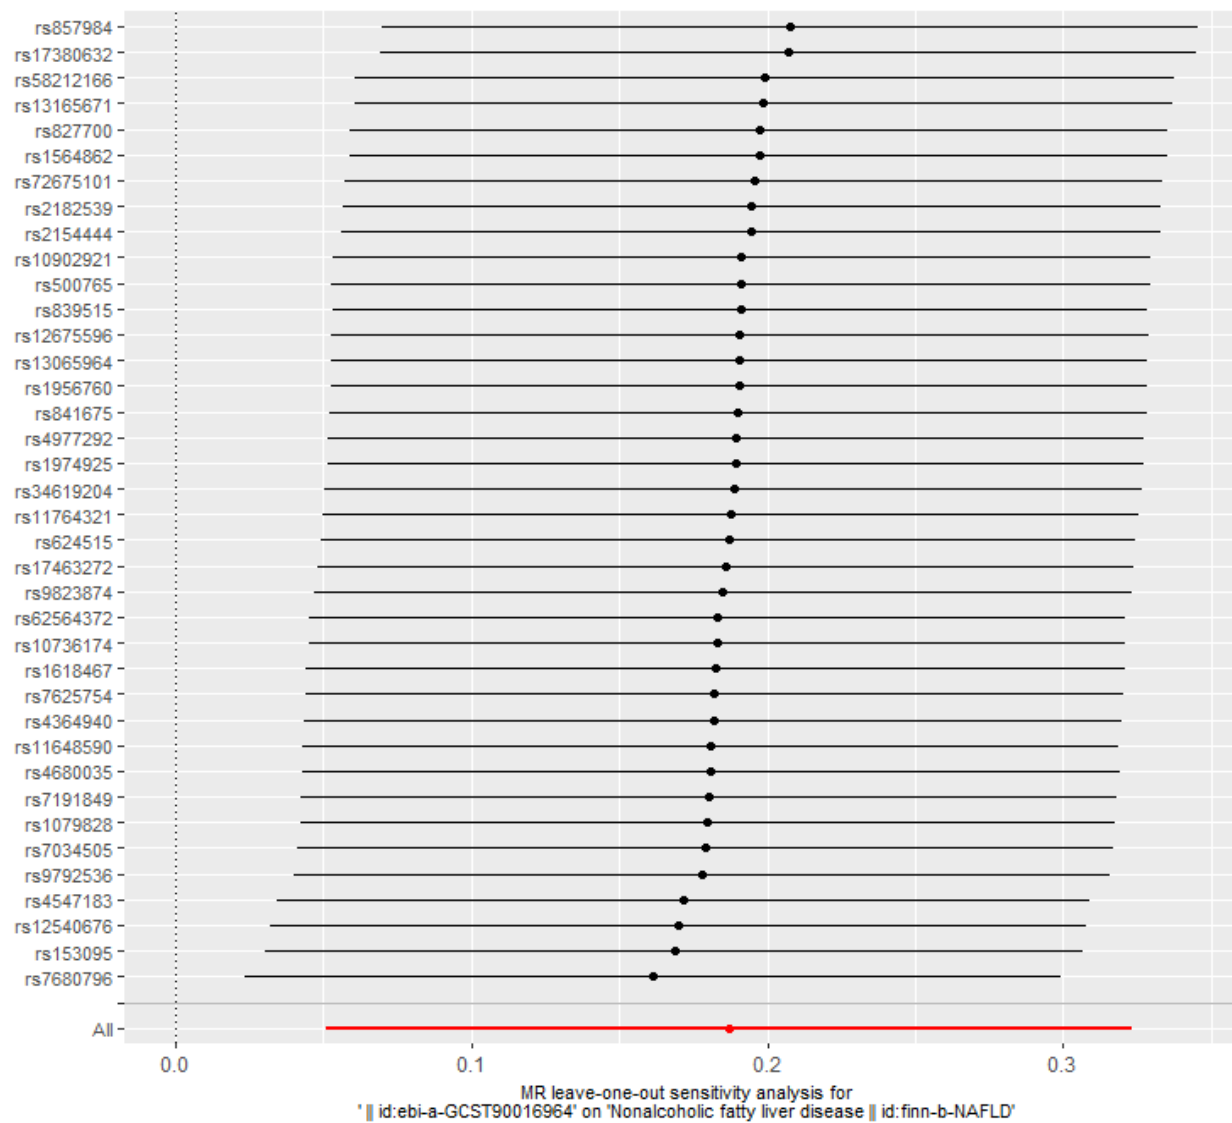

MR Method

- Inverse variance weighted
- MR Egger

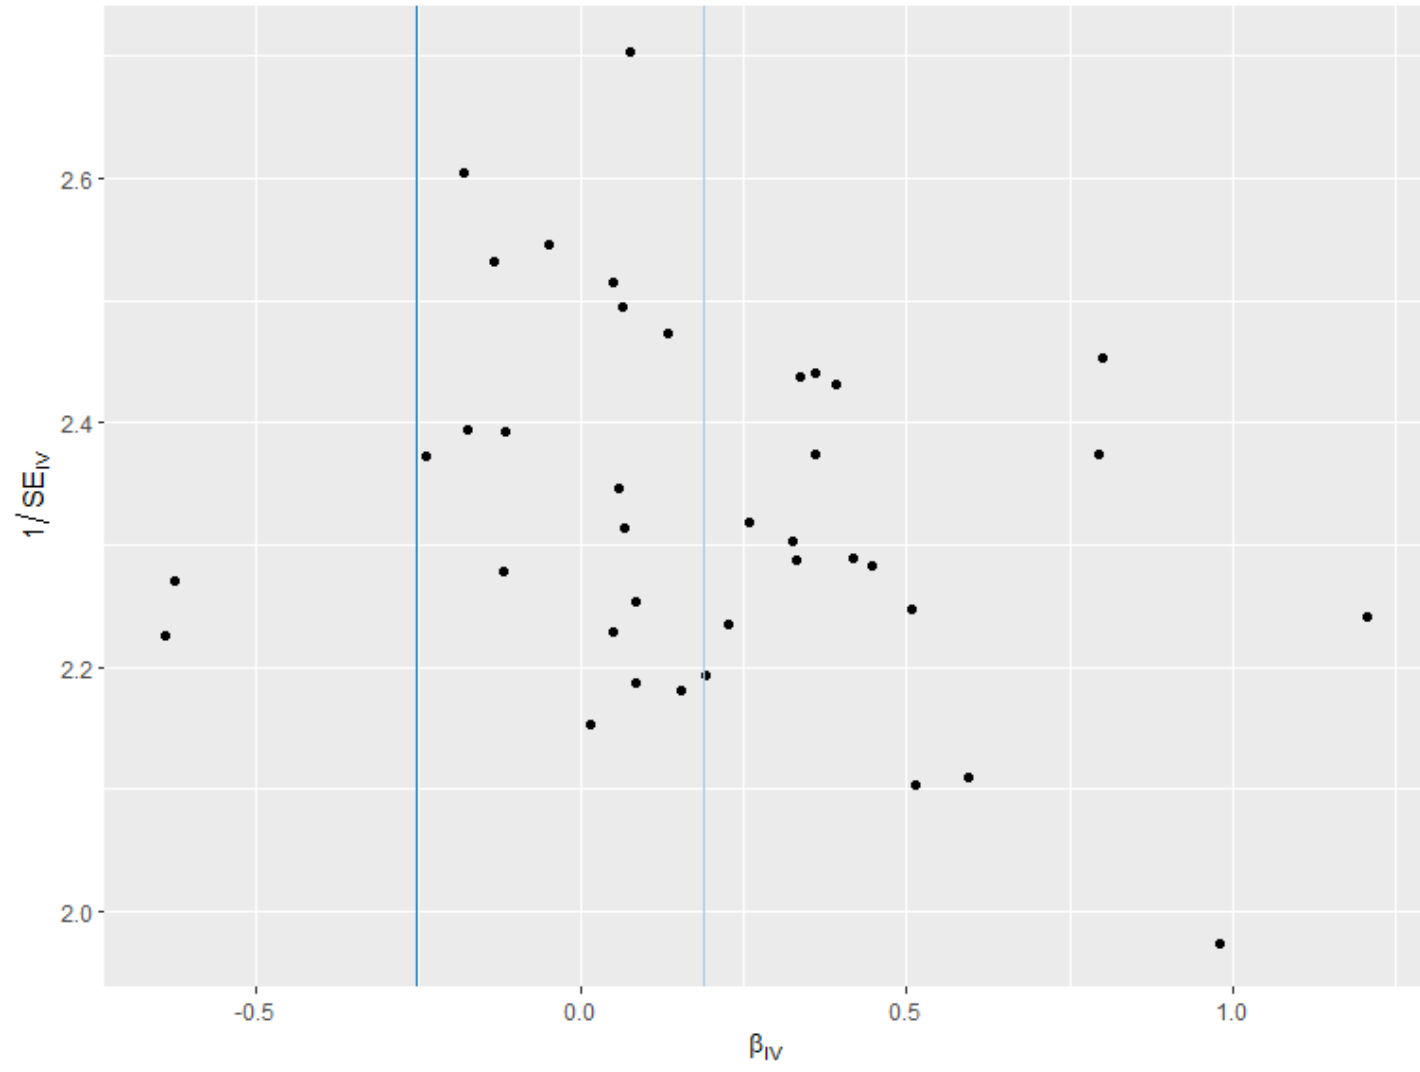

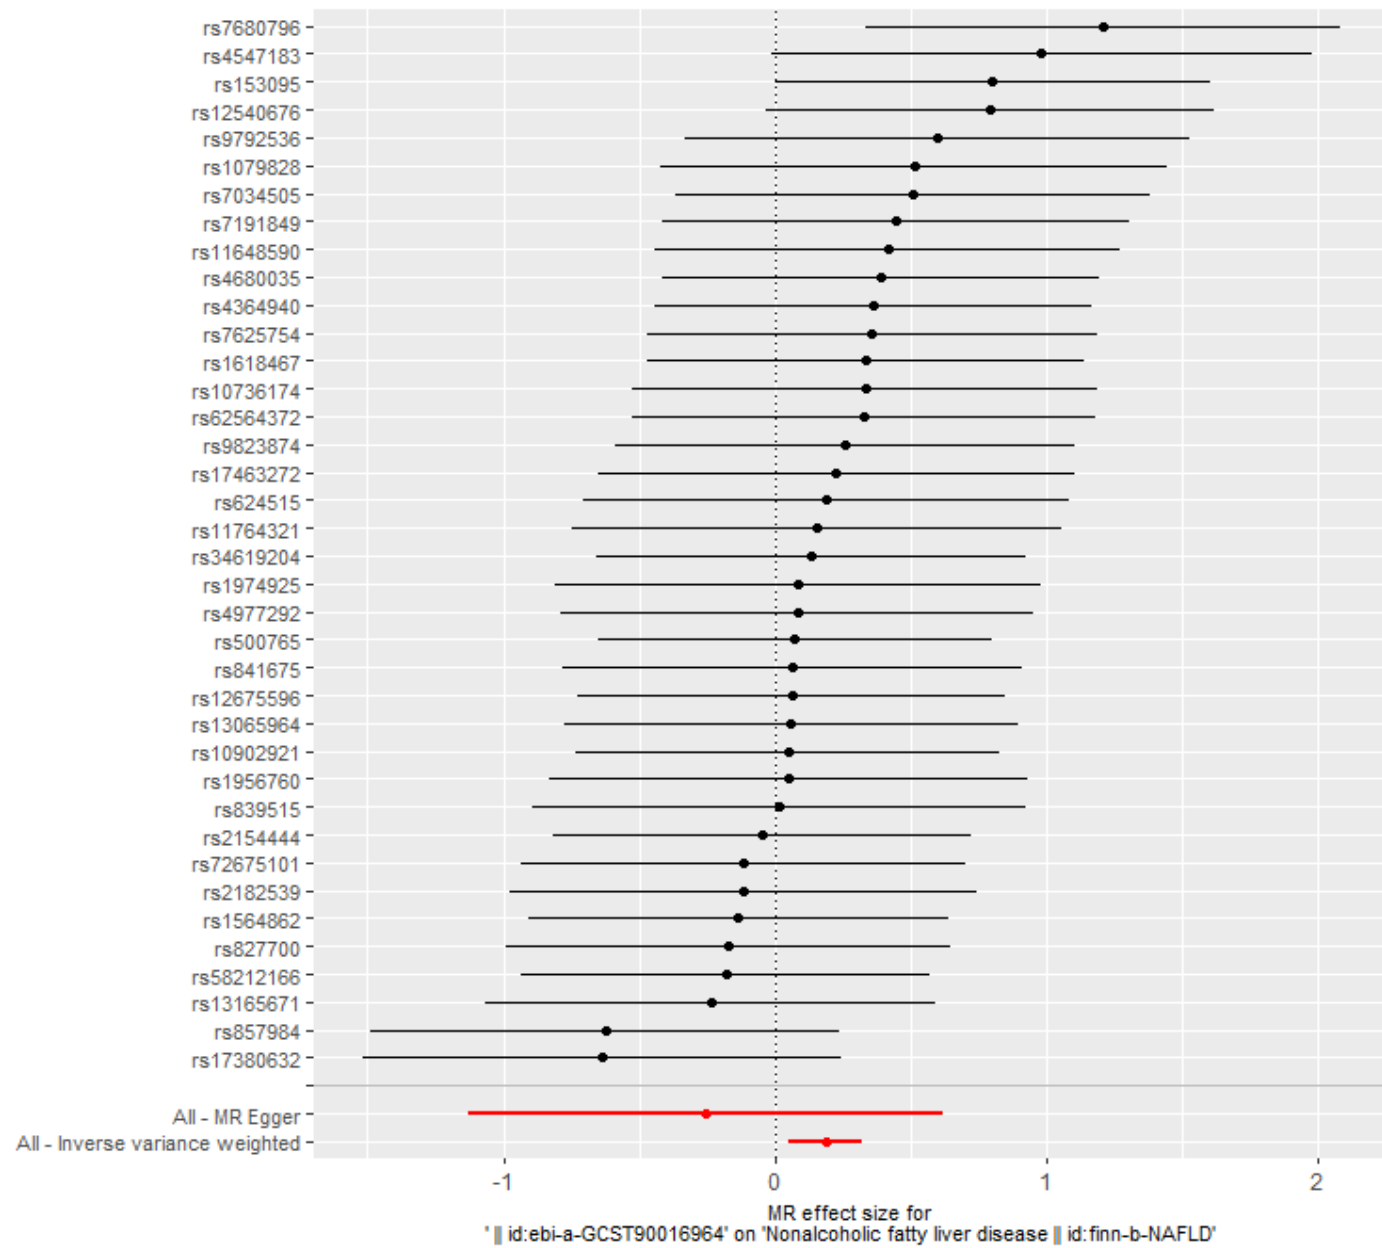

MR Test

- Inverse variance weighted
- MR Egger
- Simple mode
- Weighted median
- Weighted mode

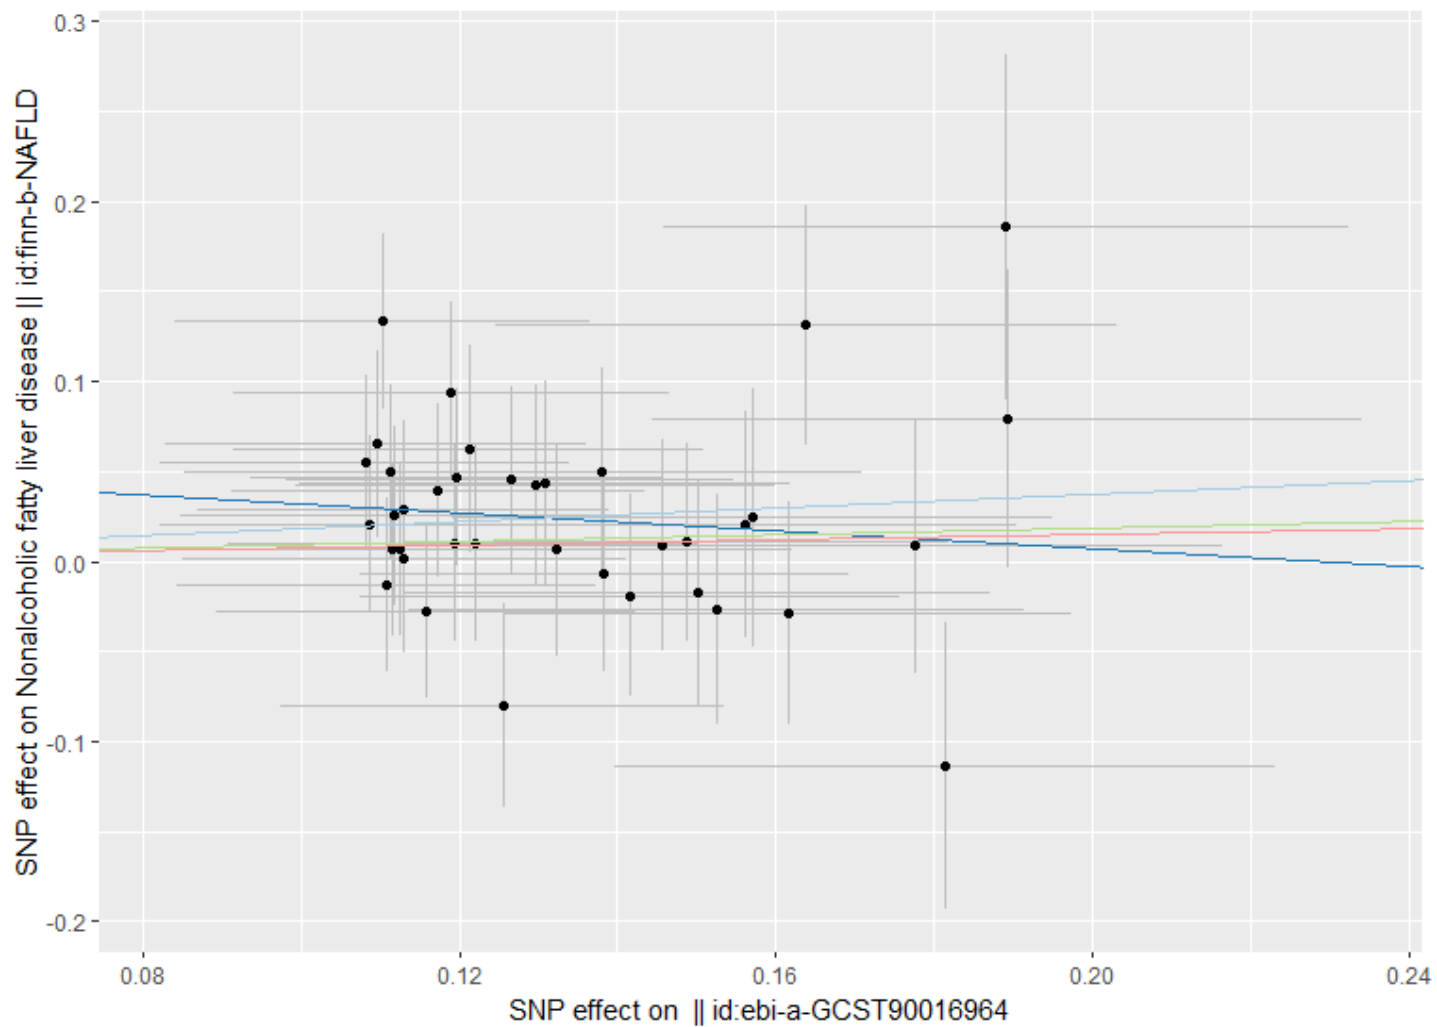



**Figure 153** Leave-one-out analysis, funnel plot, MR effect size and scatter plot for gut microbiota abundance (genus *Butyricicoccus* id.2055) on nonalcoholic fatty liver disease

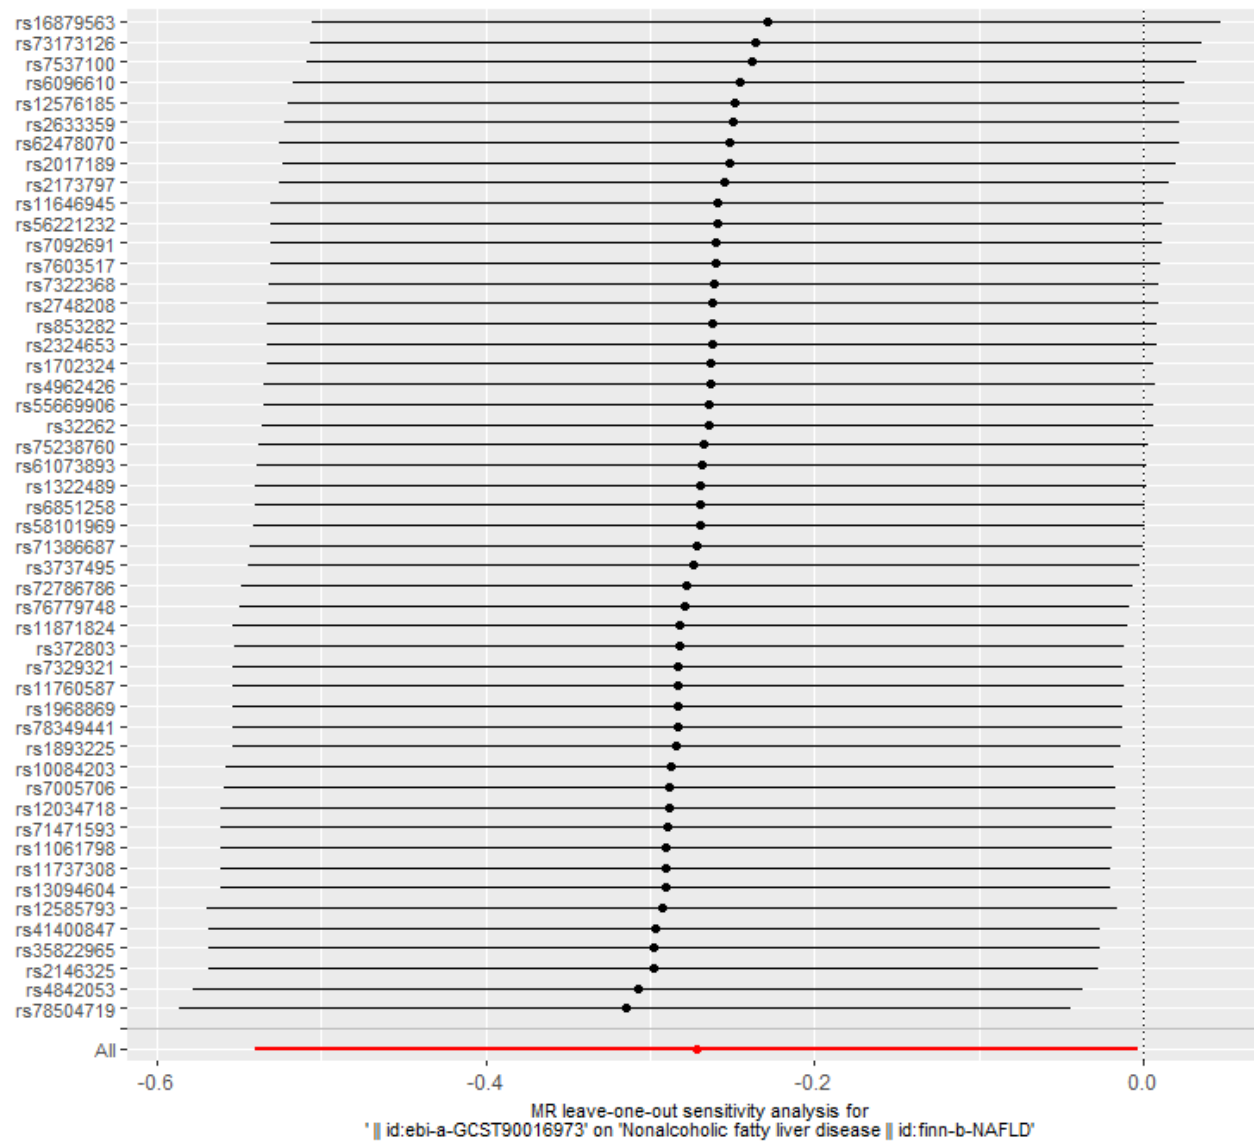

MR Method

- Inverse variance weighted
- MR Egger

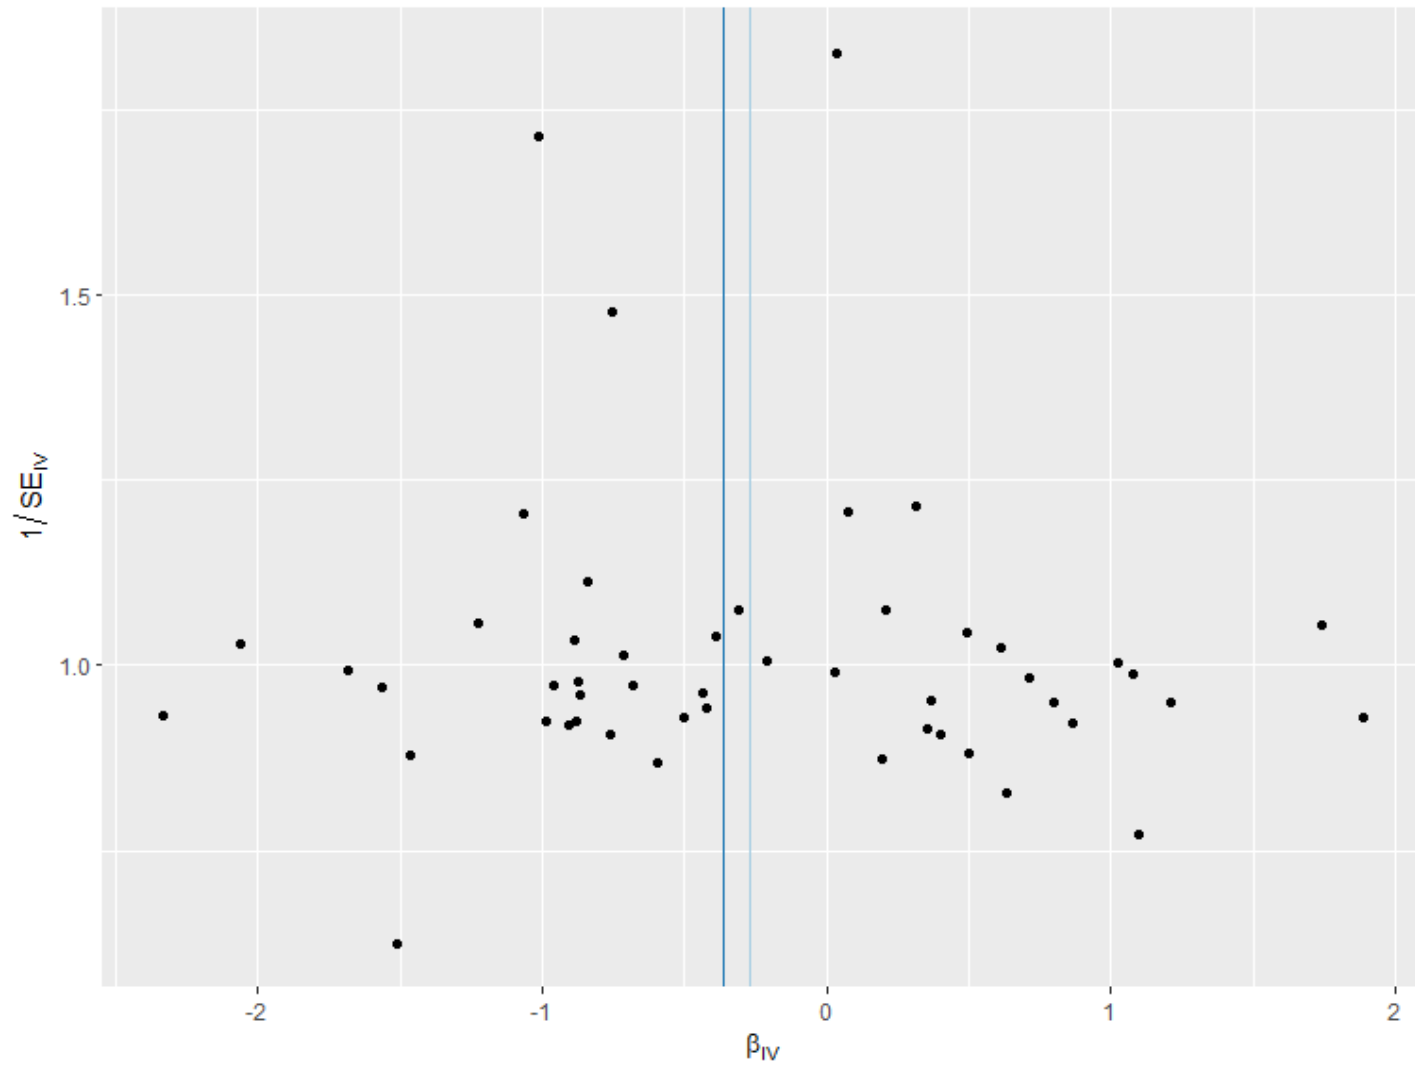

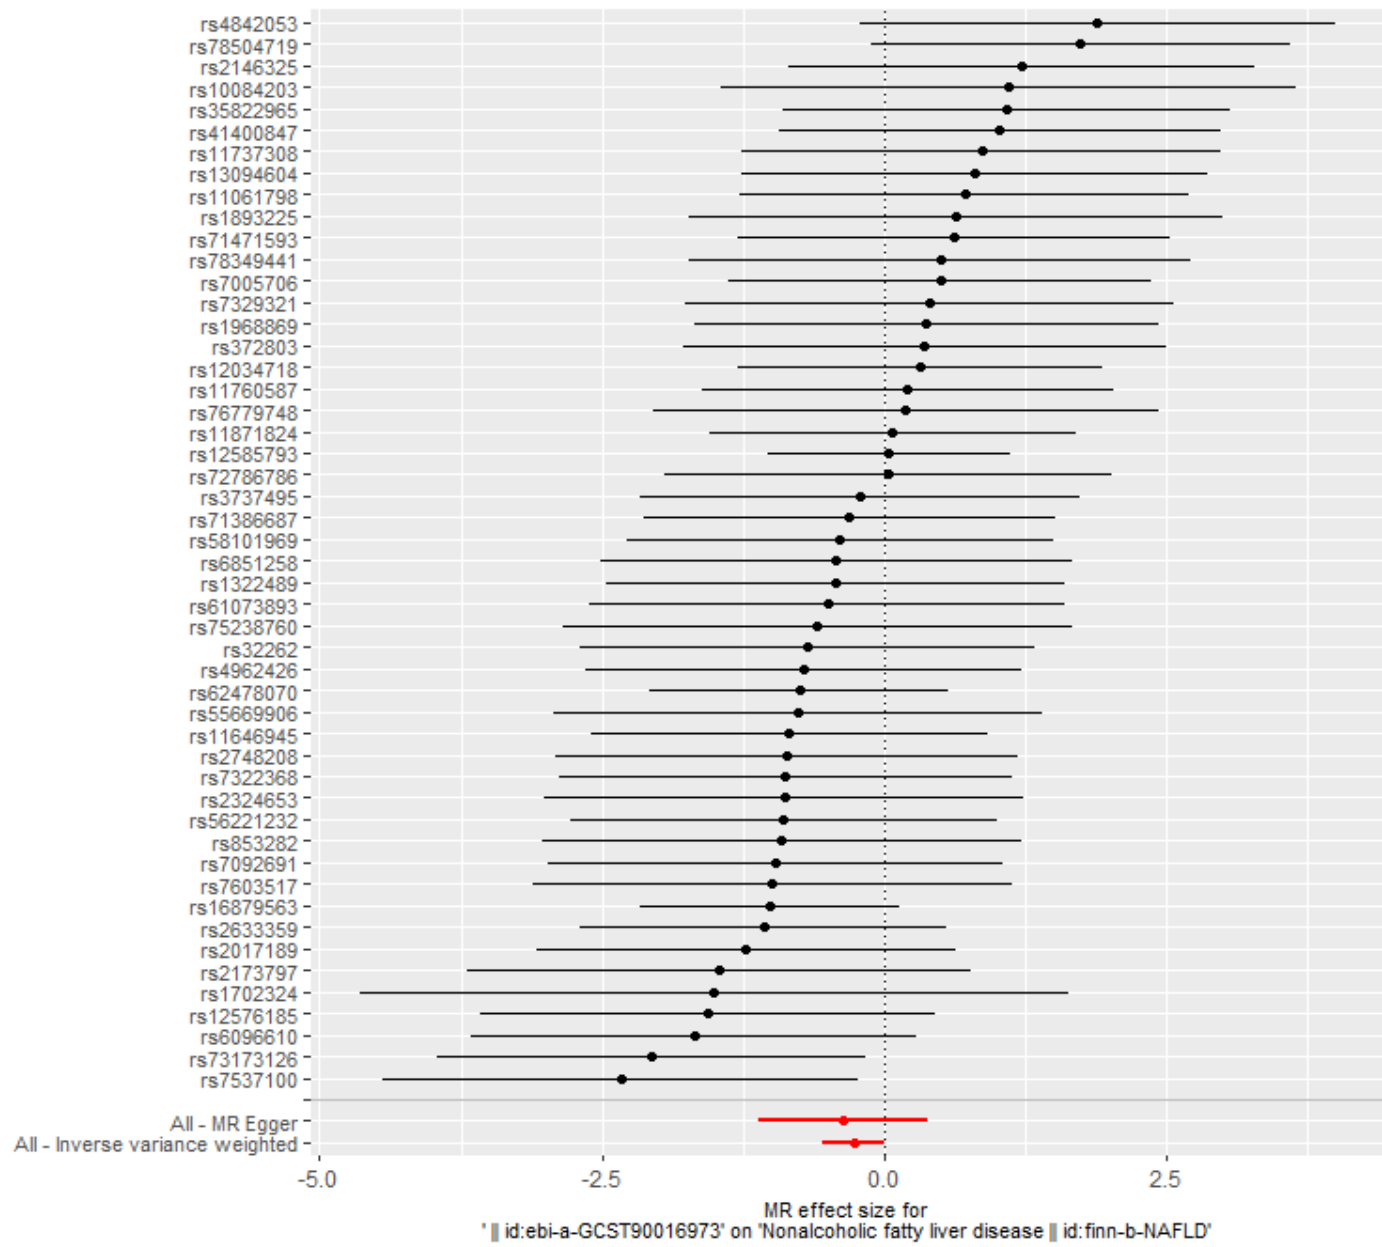

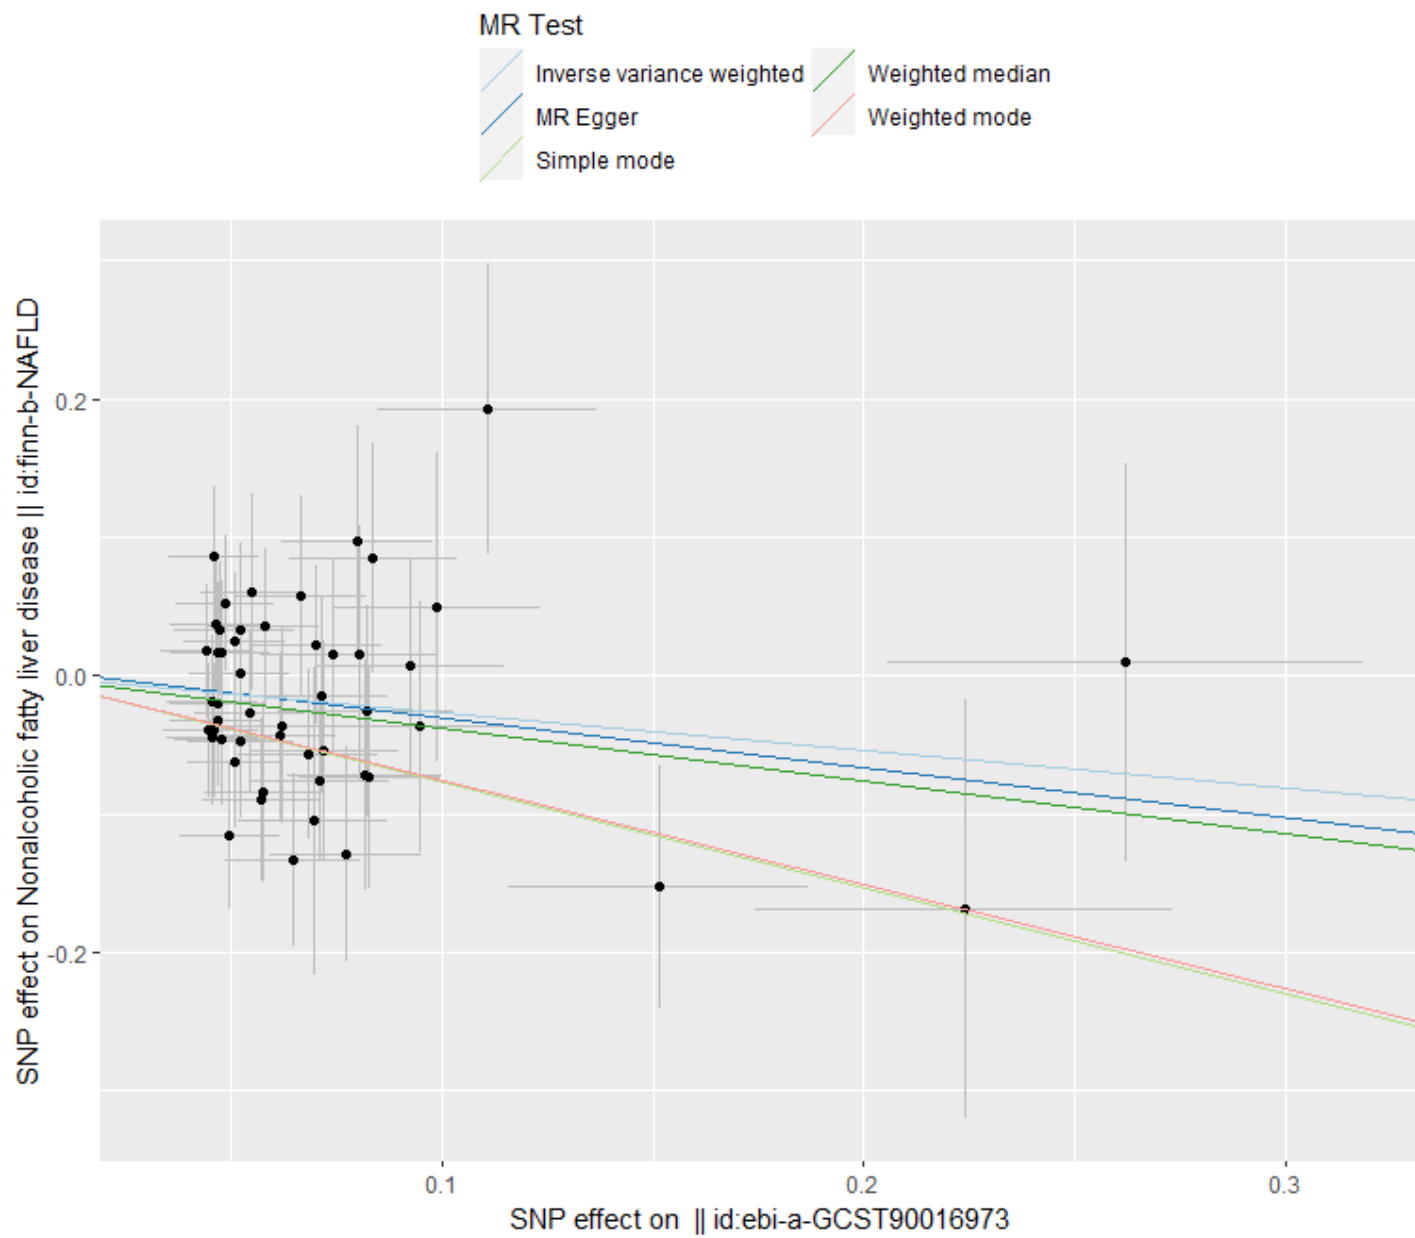

**Figure 154** Leave-one-out analysis, funnel plot, MR effect size and scatter plot for gut microbiota abundance (genus *Collinsella* id.815) on nonalcoholic fatty liver disease

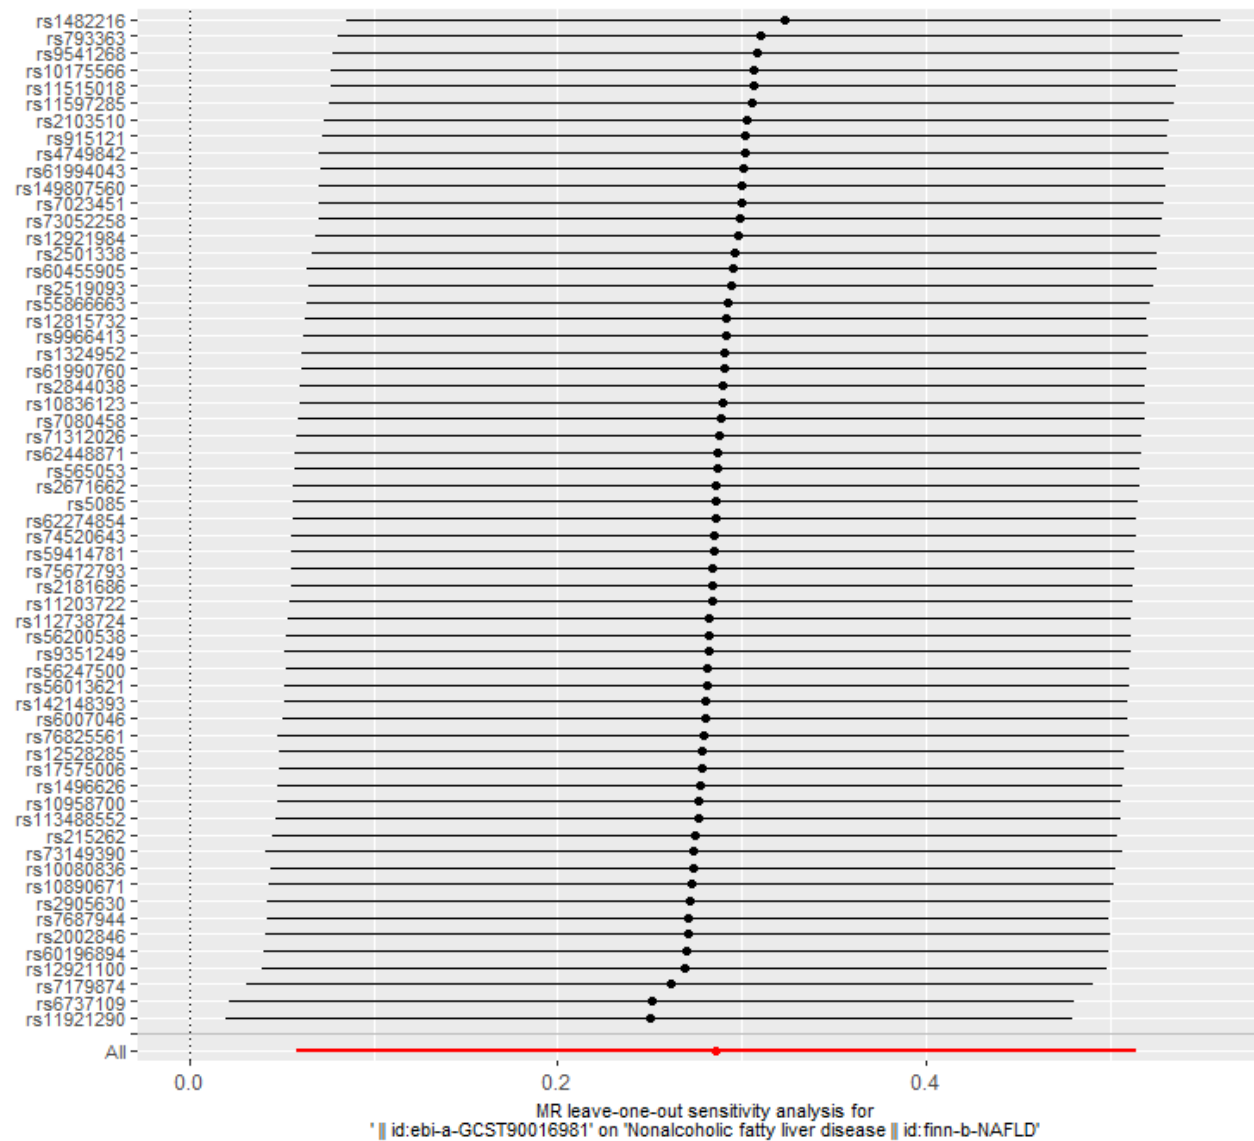

MR Method

- Inverse variance weighted
- MR Egger

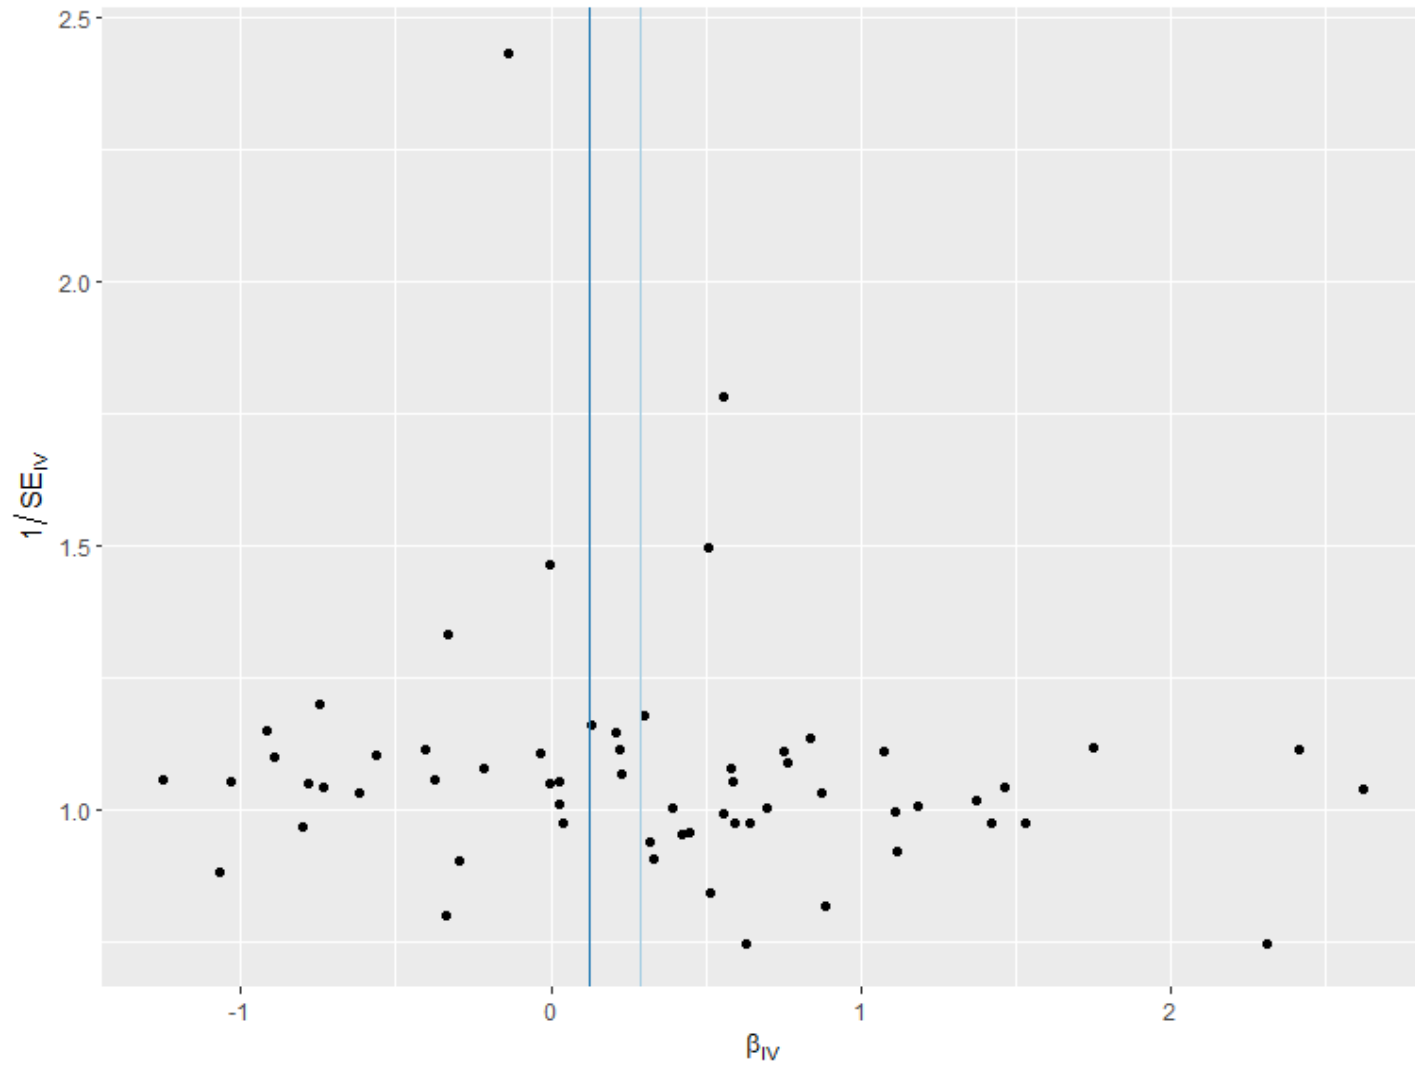

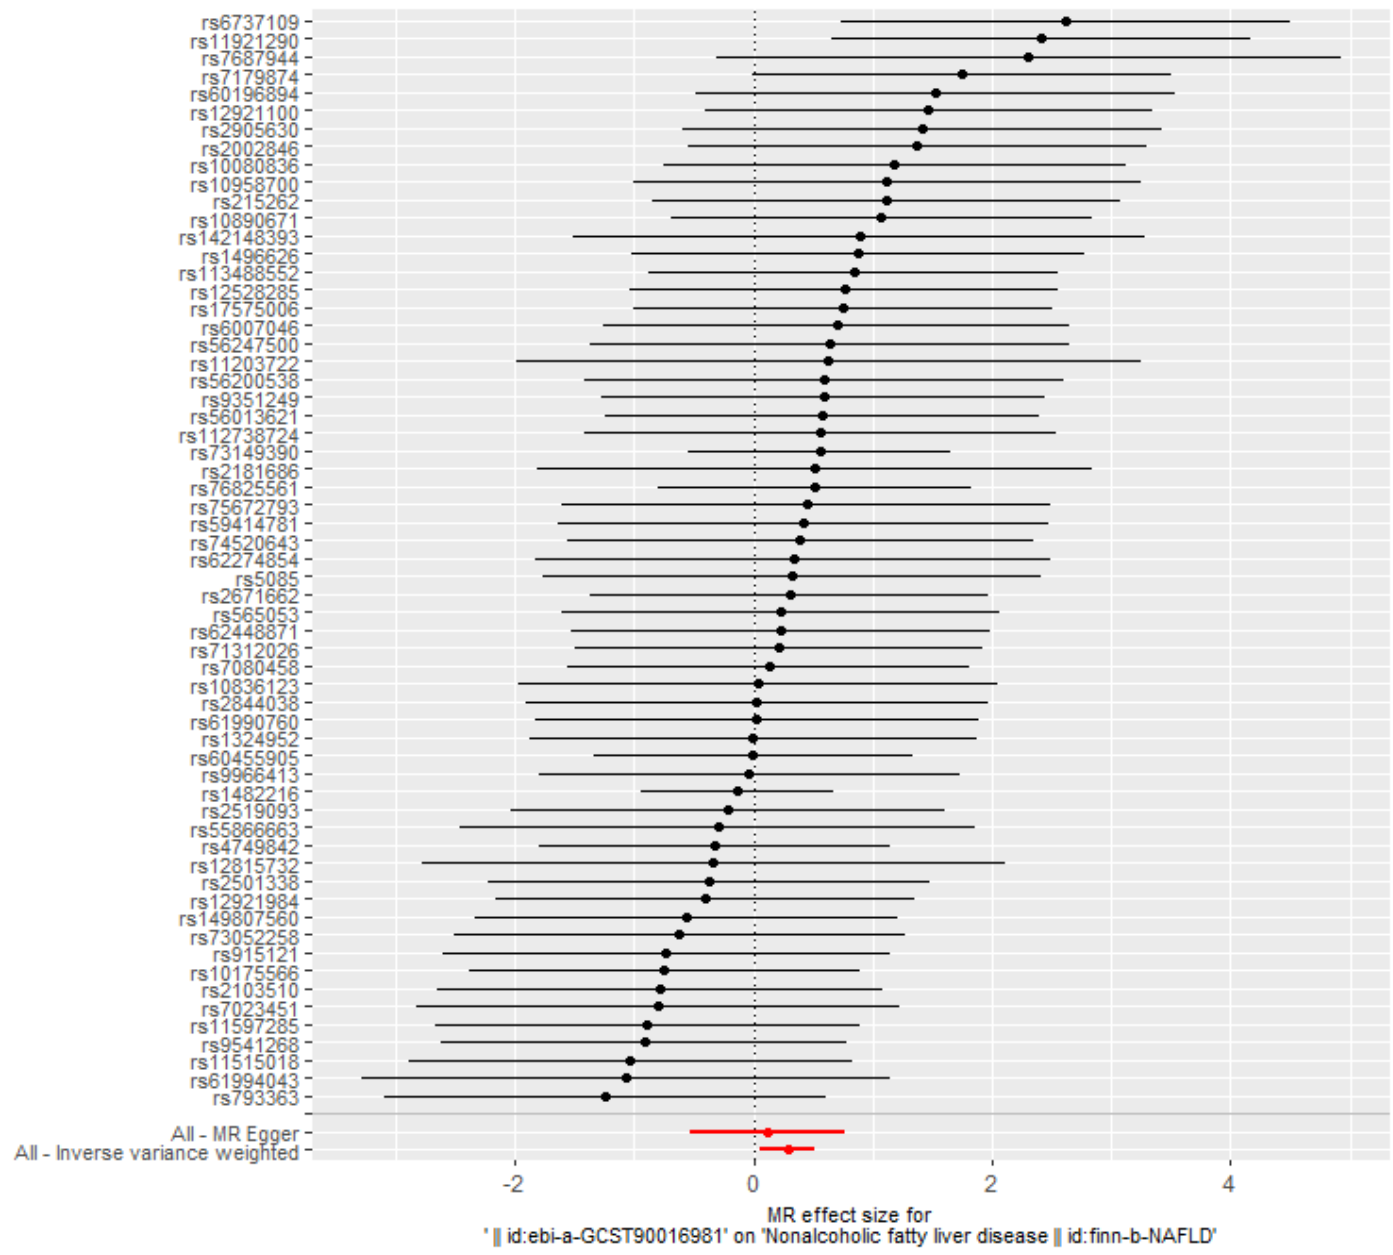

MR Test

- Inverse variance weighted
- MR Egger
- Simple mode
- Weighted median
- Weighted mode

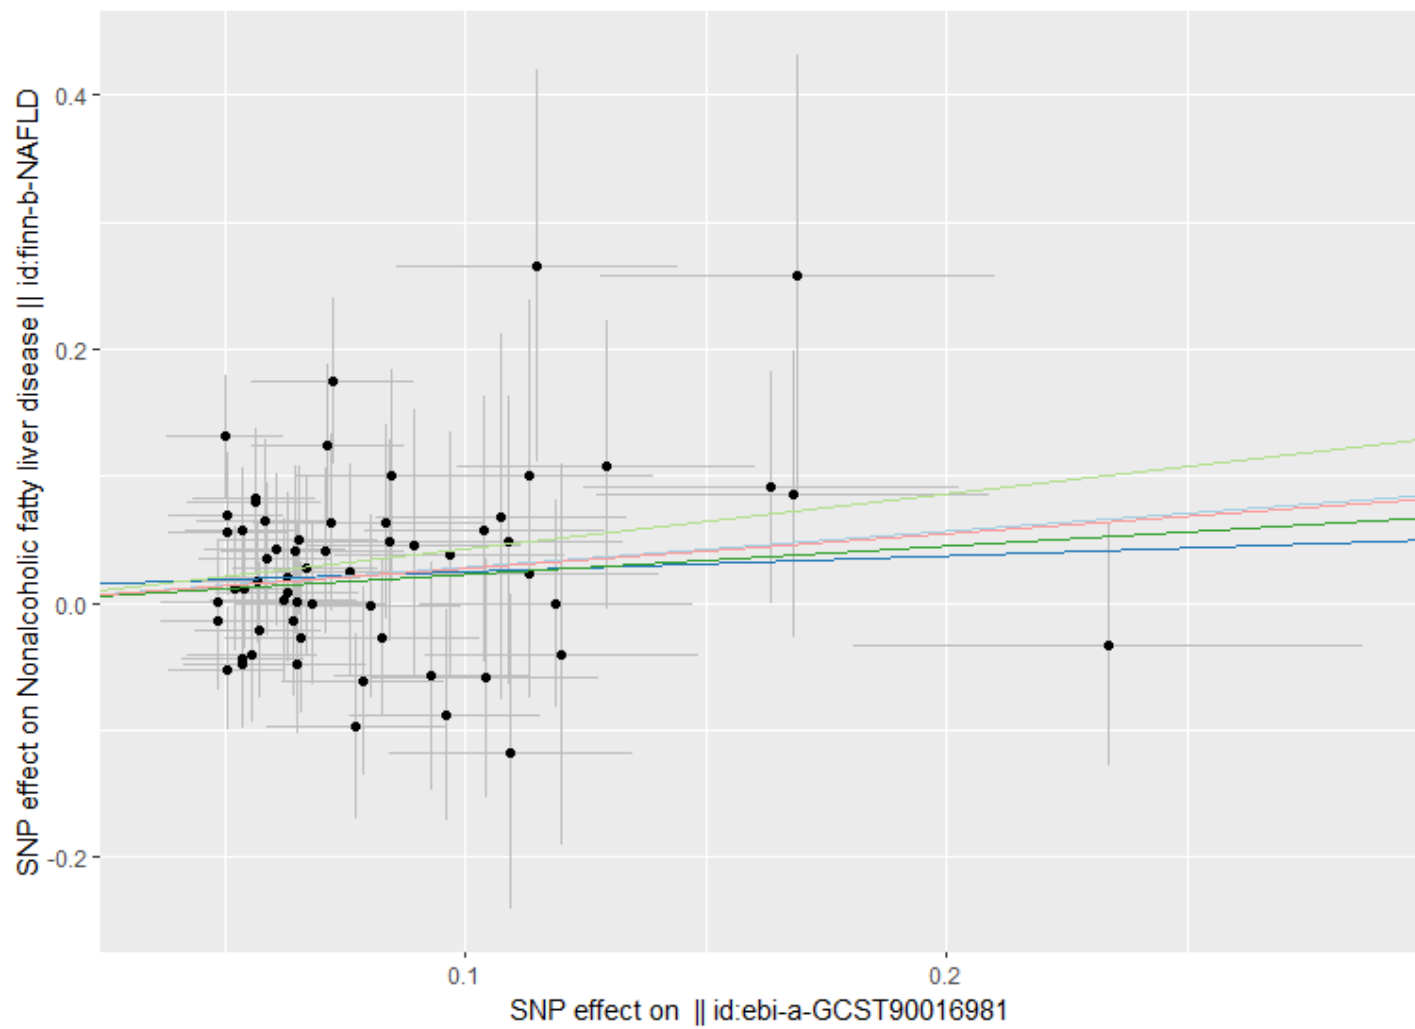



**Figure 155** Leave-one-out analysis, funnel plot, MR effect size and scatter plot for gut microbiota abundance (genus *Erysipelatoclostridium* id.11381) on nonalcoholic fatty liver disease

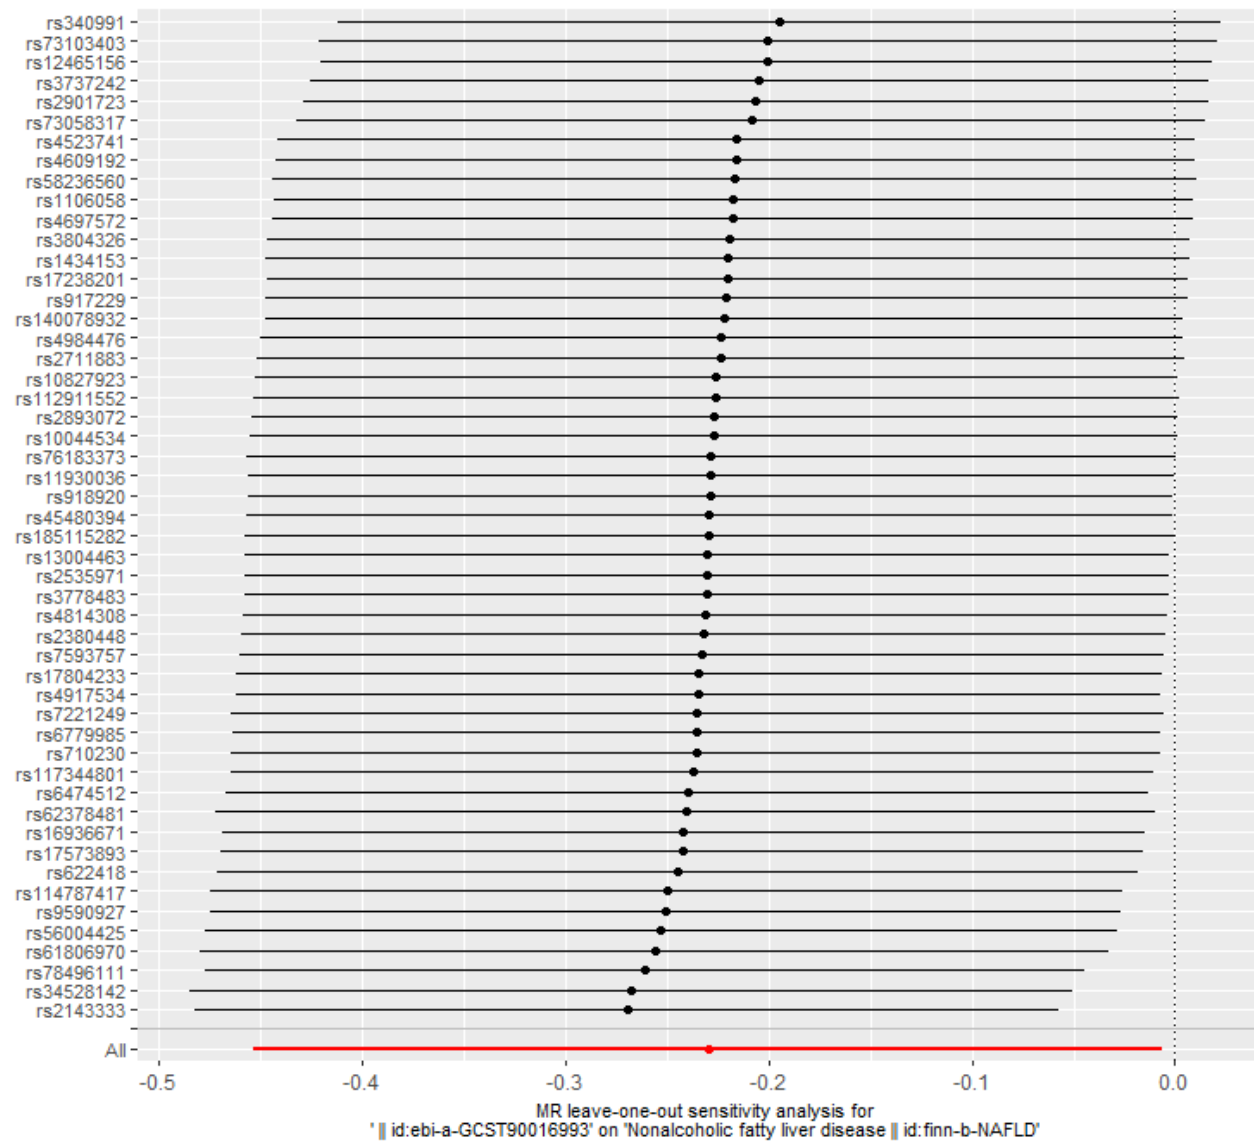

MR Method

- Inverse variance weighted
- MR Egger

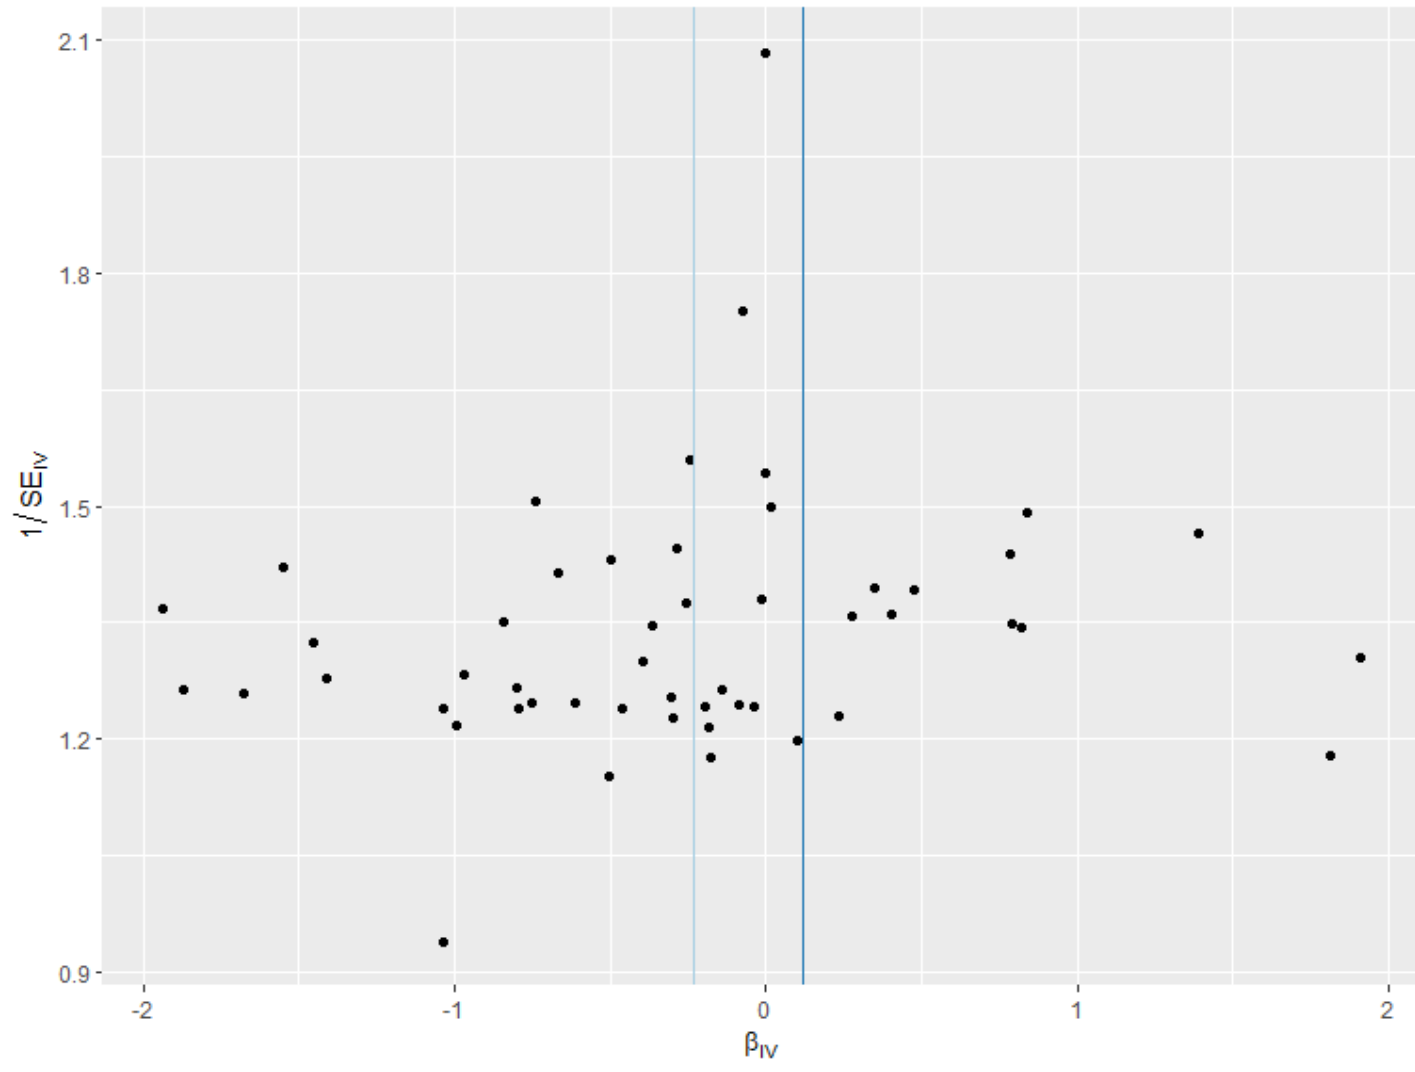

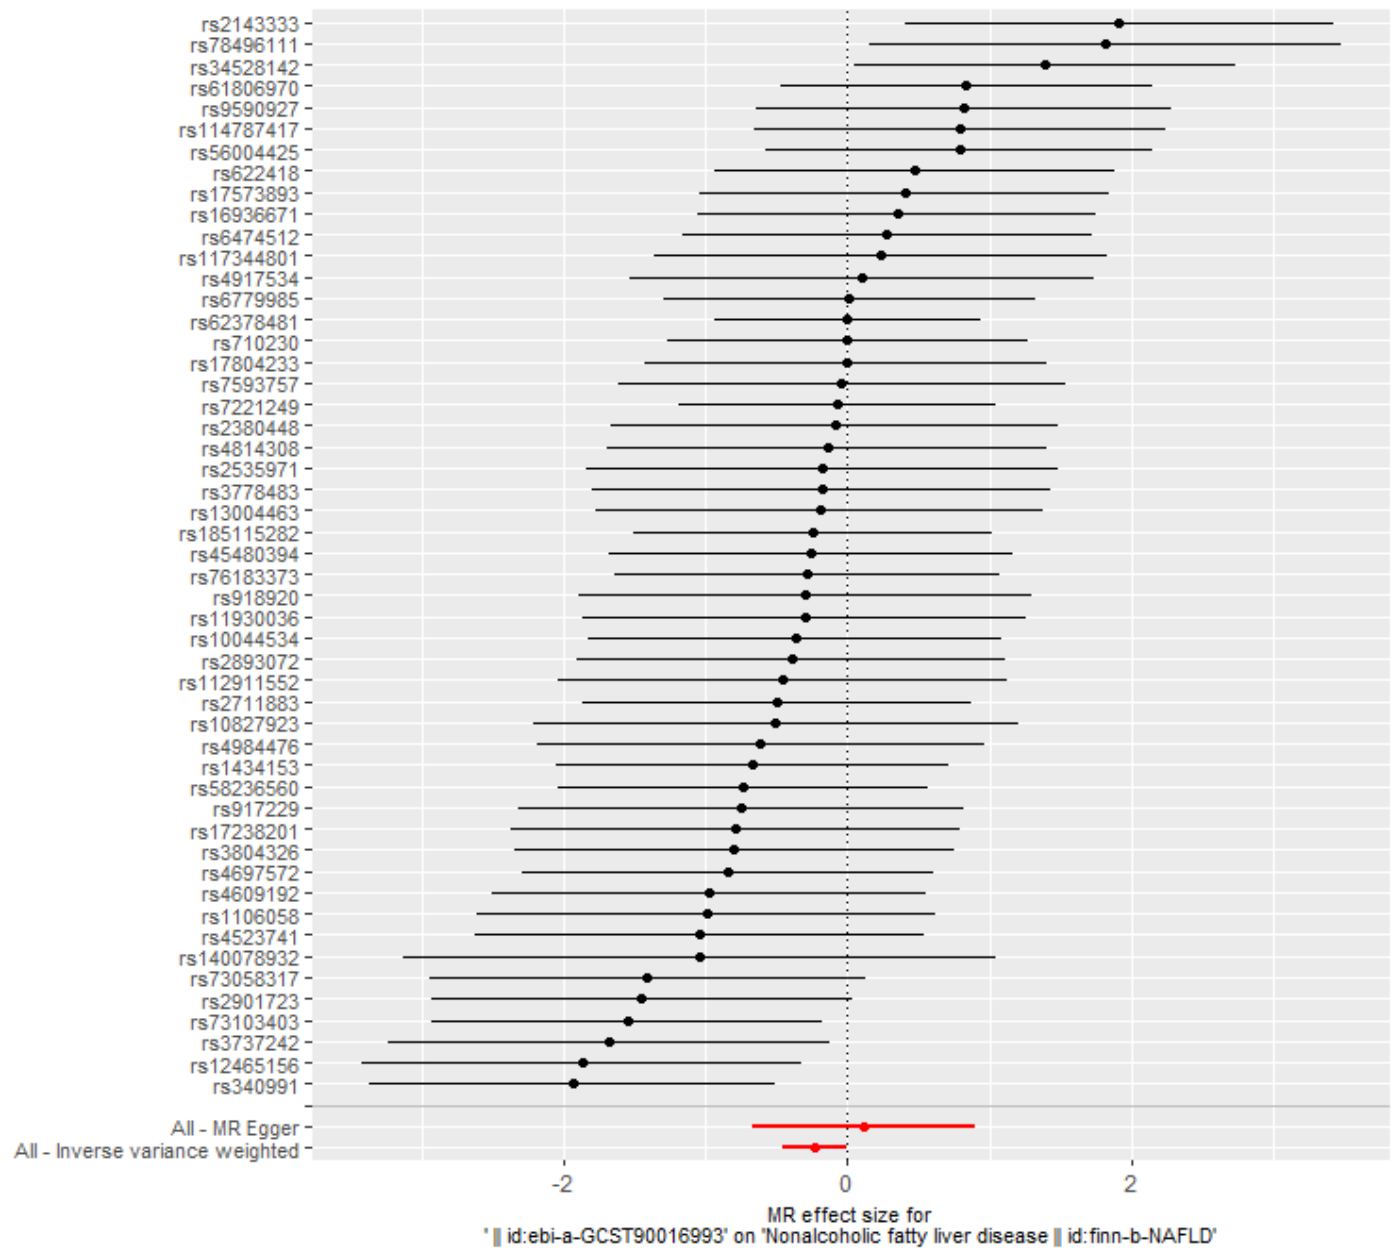

MR Test

- Inverse variance weighted
- MR Egger
- Simple mode
- Weighted median
- Weighted mode

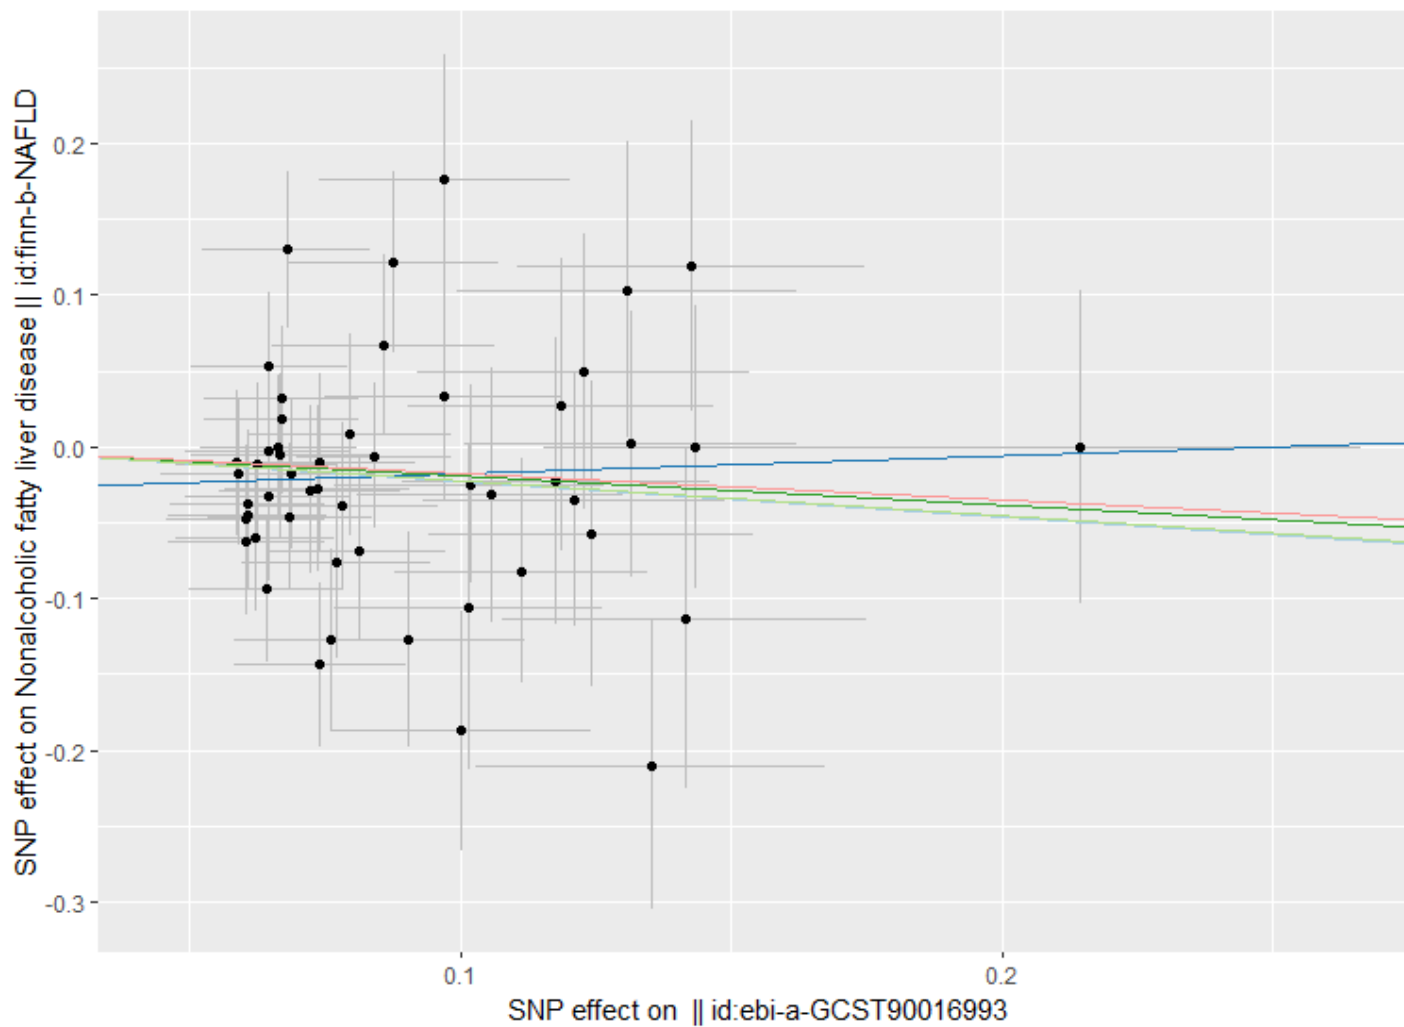

**Figure 156** Leave-one-out analysis, funnel plot, MR effect size and scatter plot for gut microbiota abundance (genus *Eubacterium hallii* group id.11338) on nonalcoholic fatty liver disease

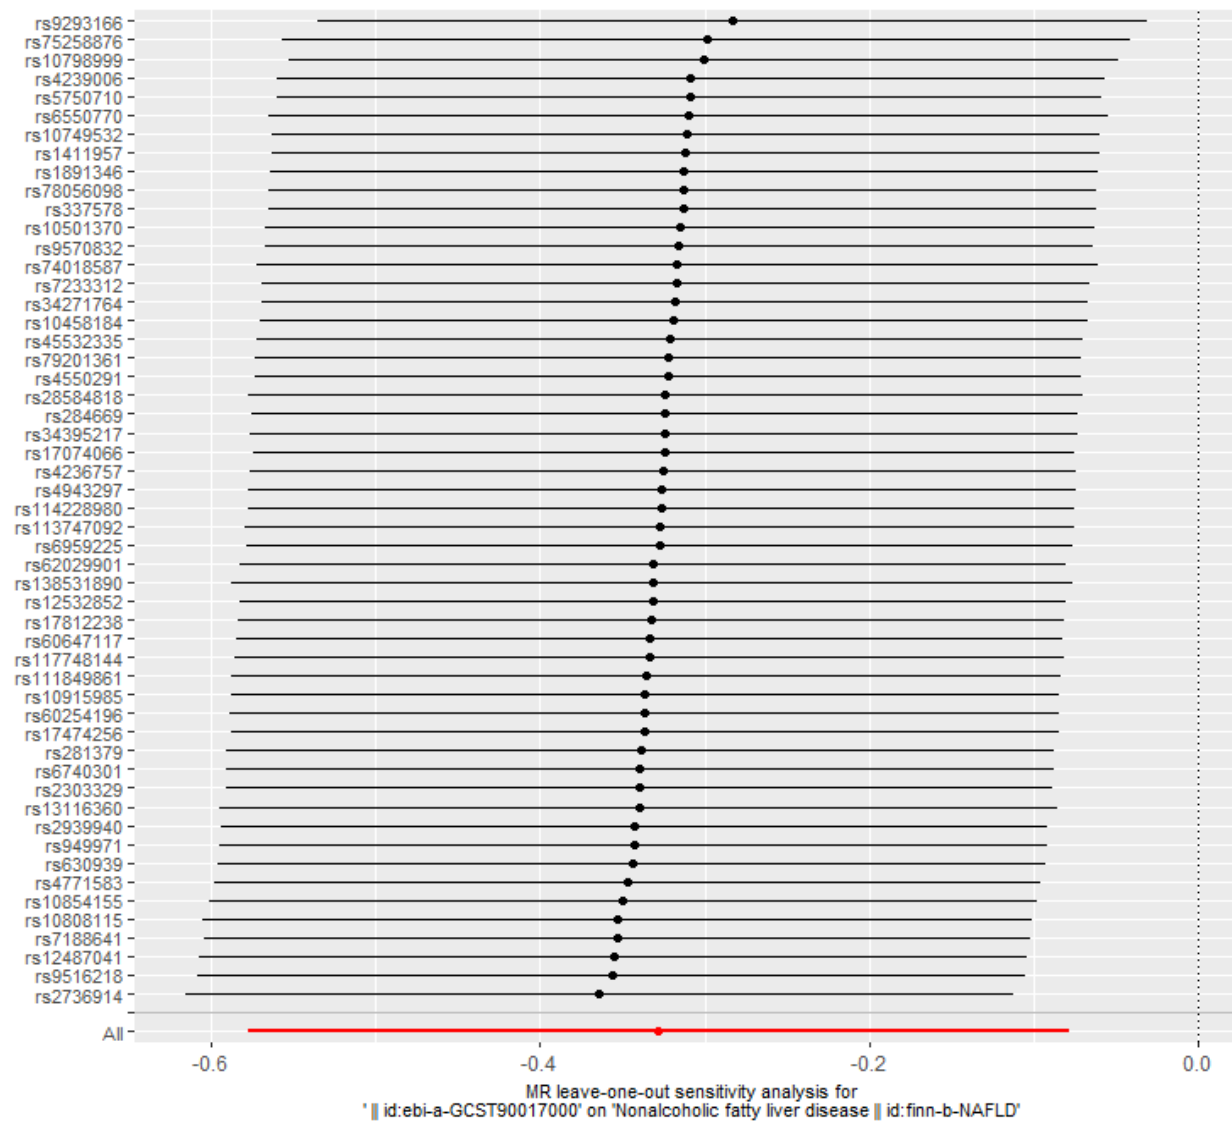

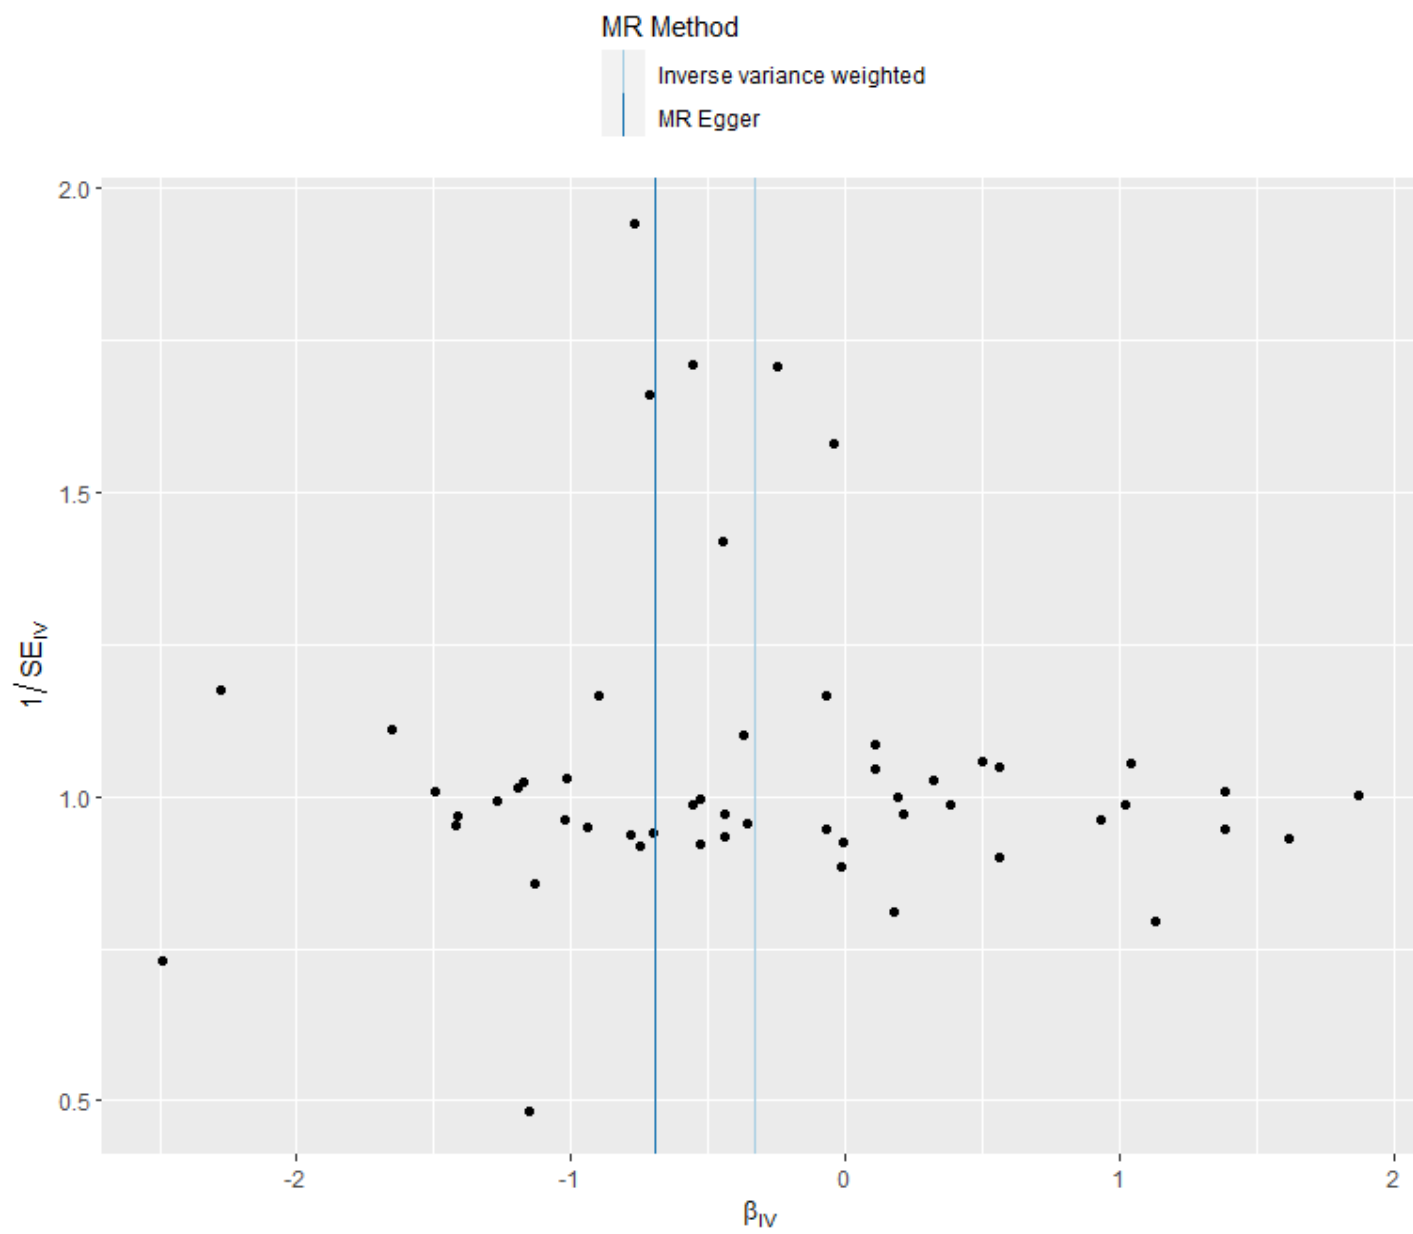

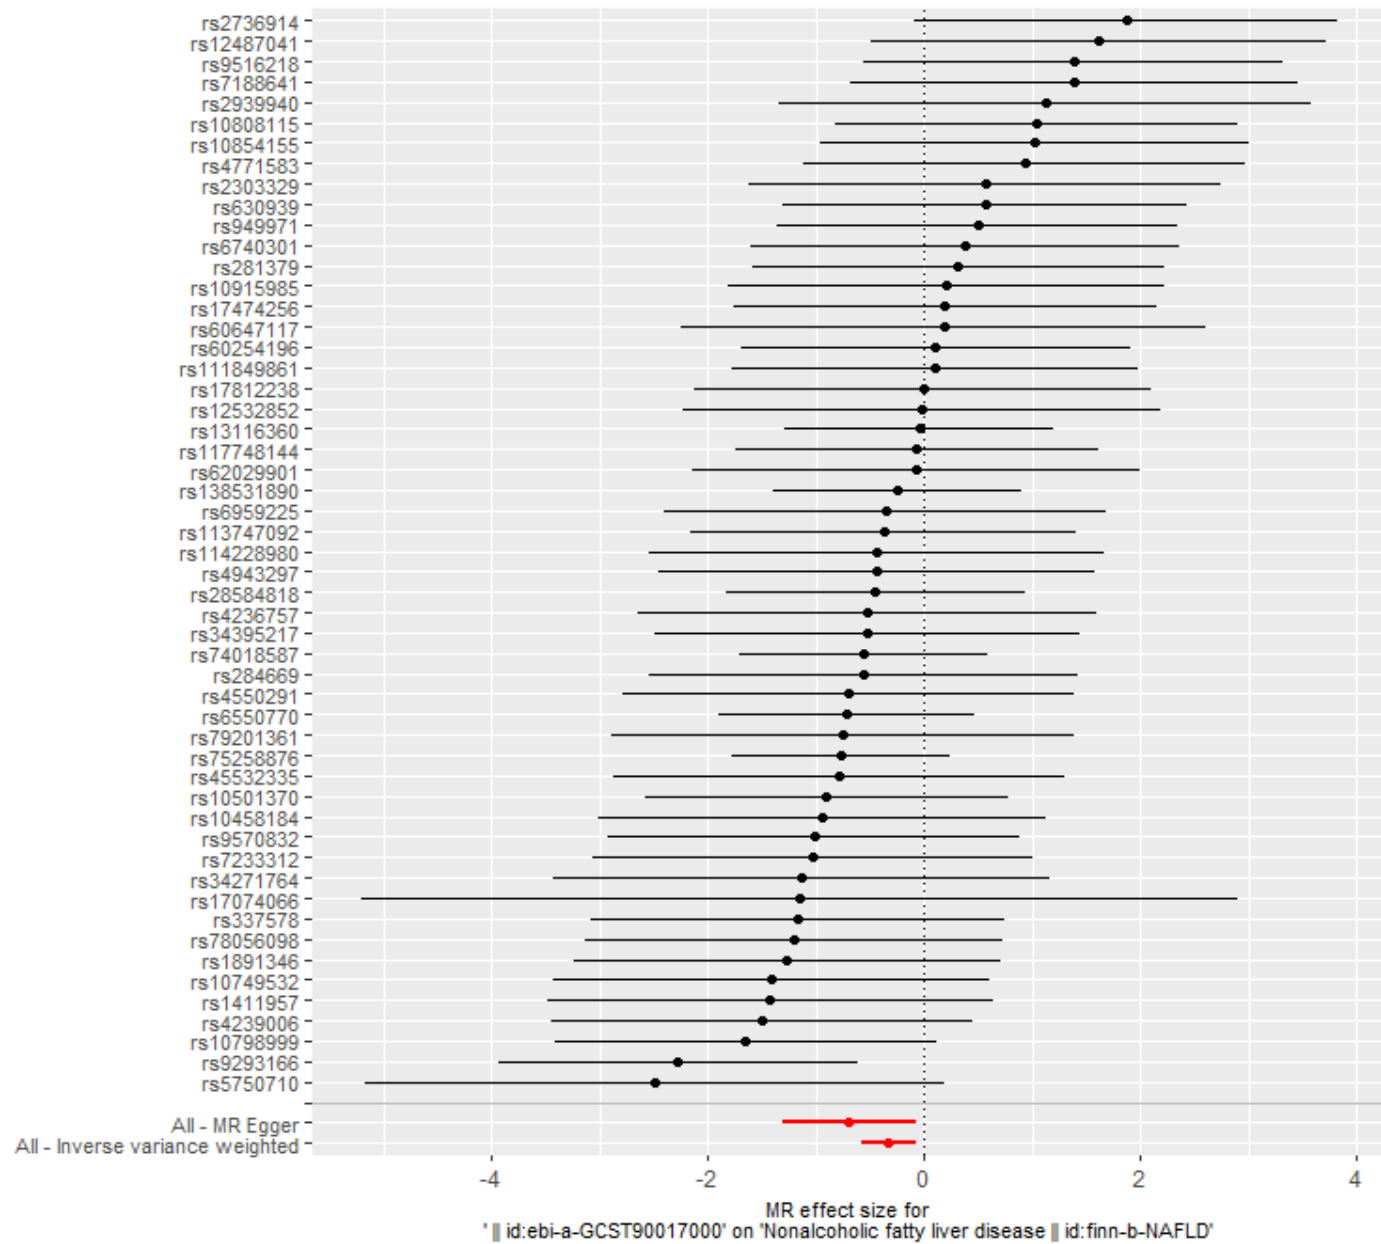

MR Test

- Inverse variance weighted
- MR Egger
- Simple mode
- Weighted median
- Weighted mode

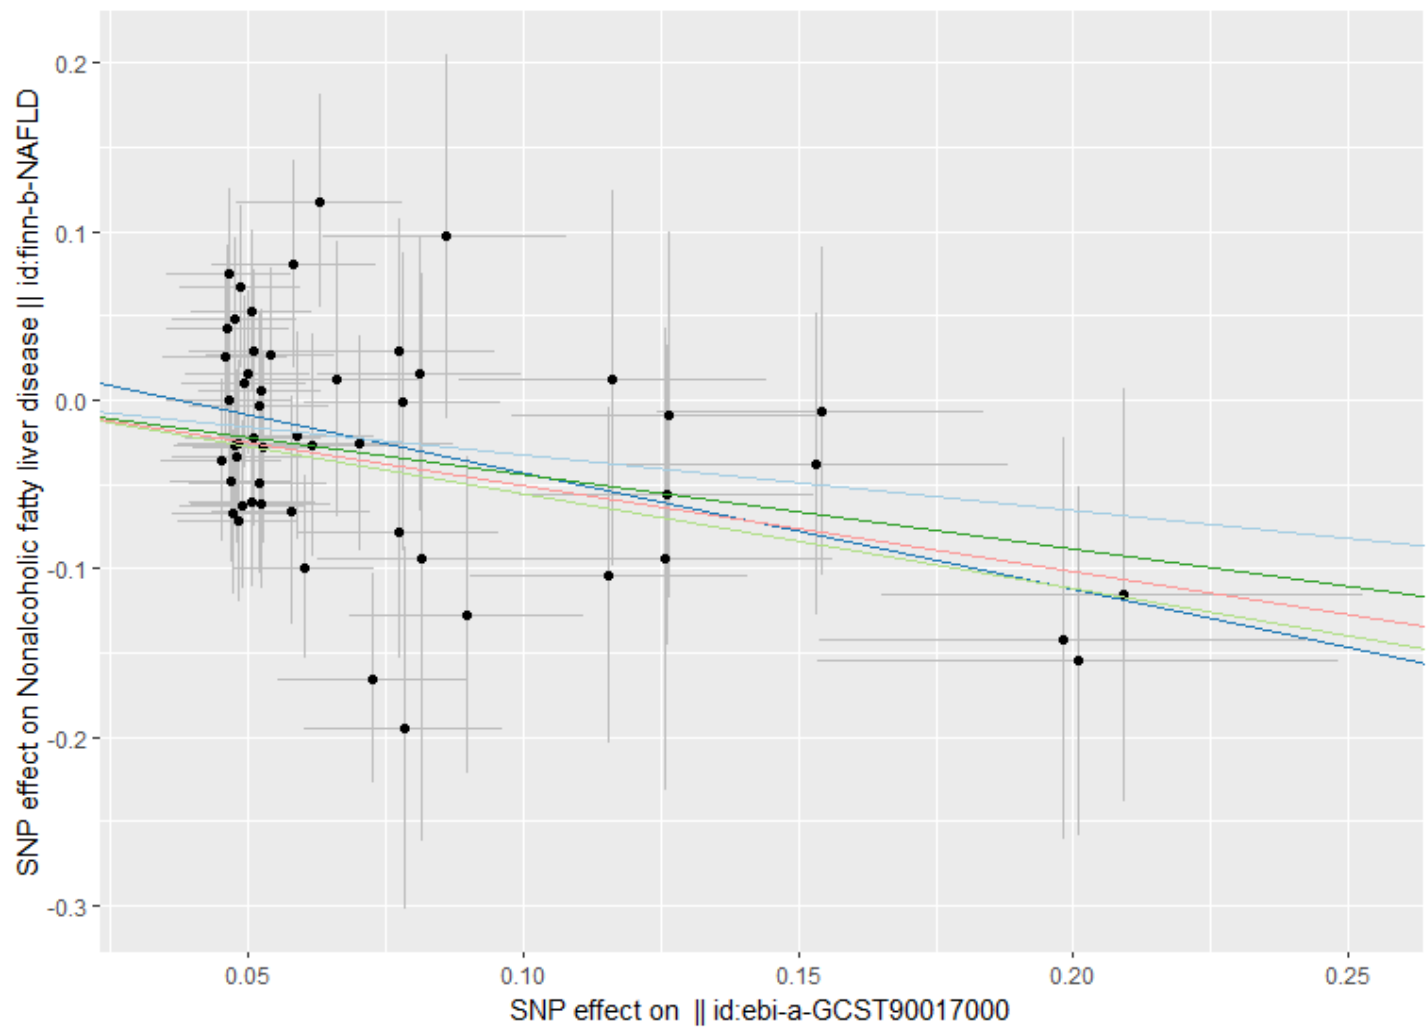



**Figure 157** Leave-one-out analysis, funnel plot, MR effect size and scatter plot for gut microbiota abundance (genus *Holdemanella* id.11393) on nonalcoholic fatty liver disease

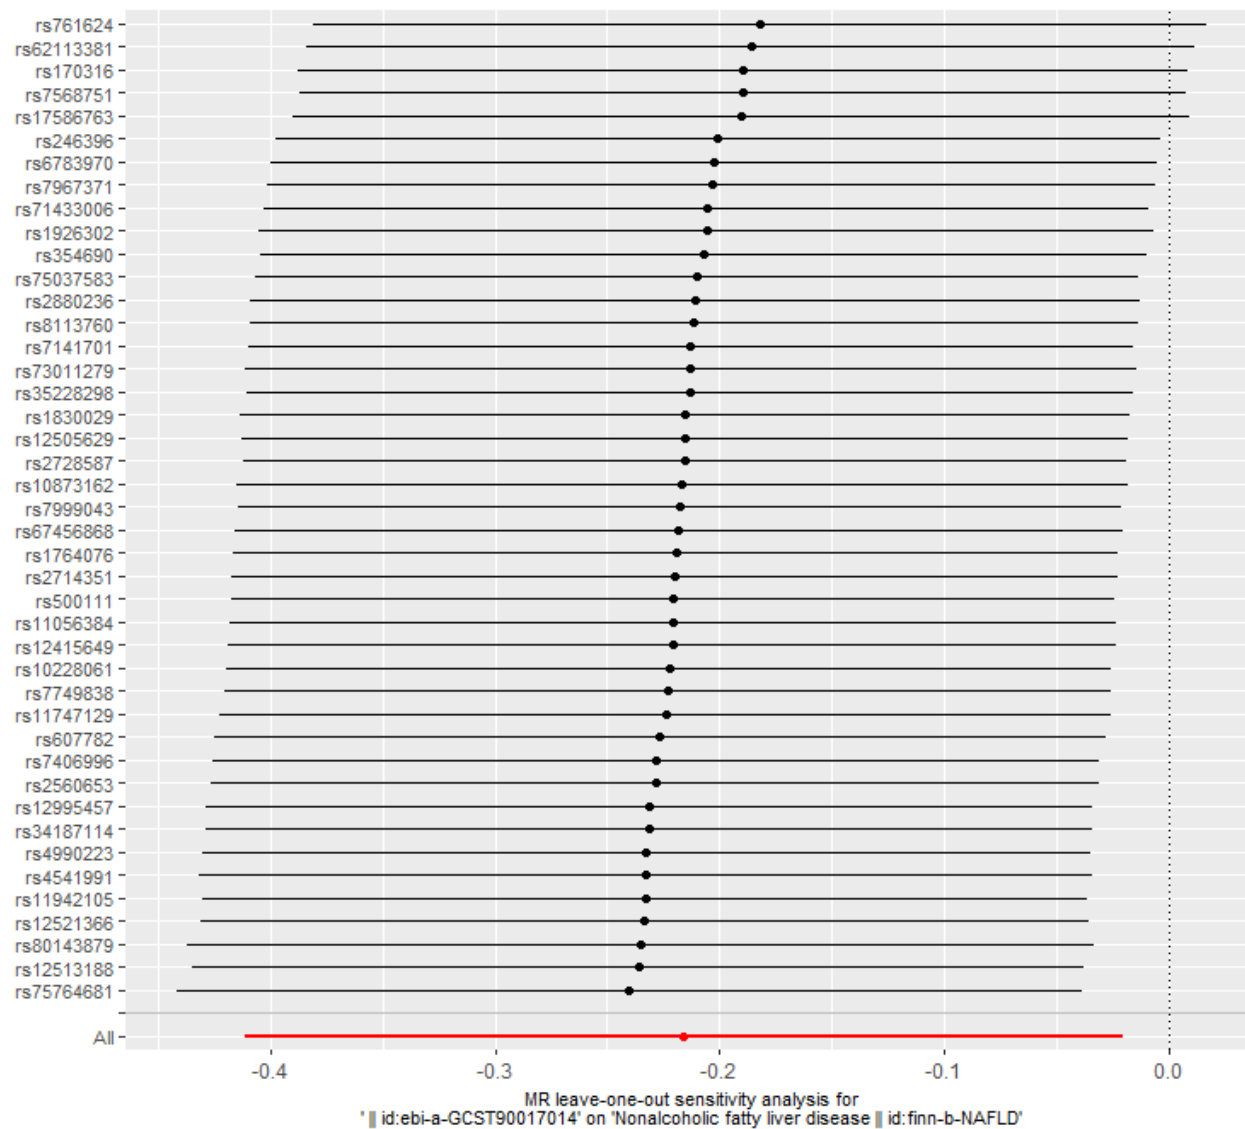

MR Method

- Inverse variance weighted
- MR Egger

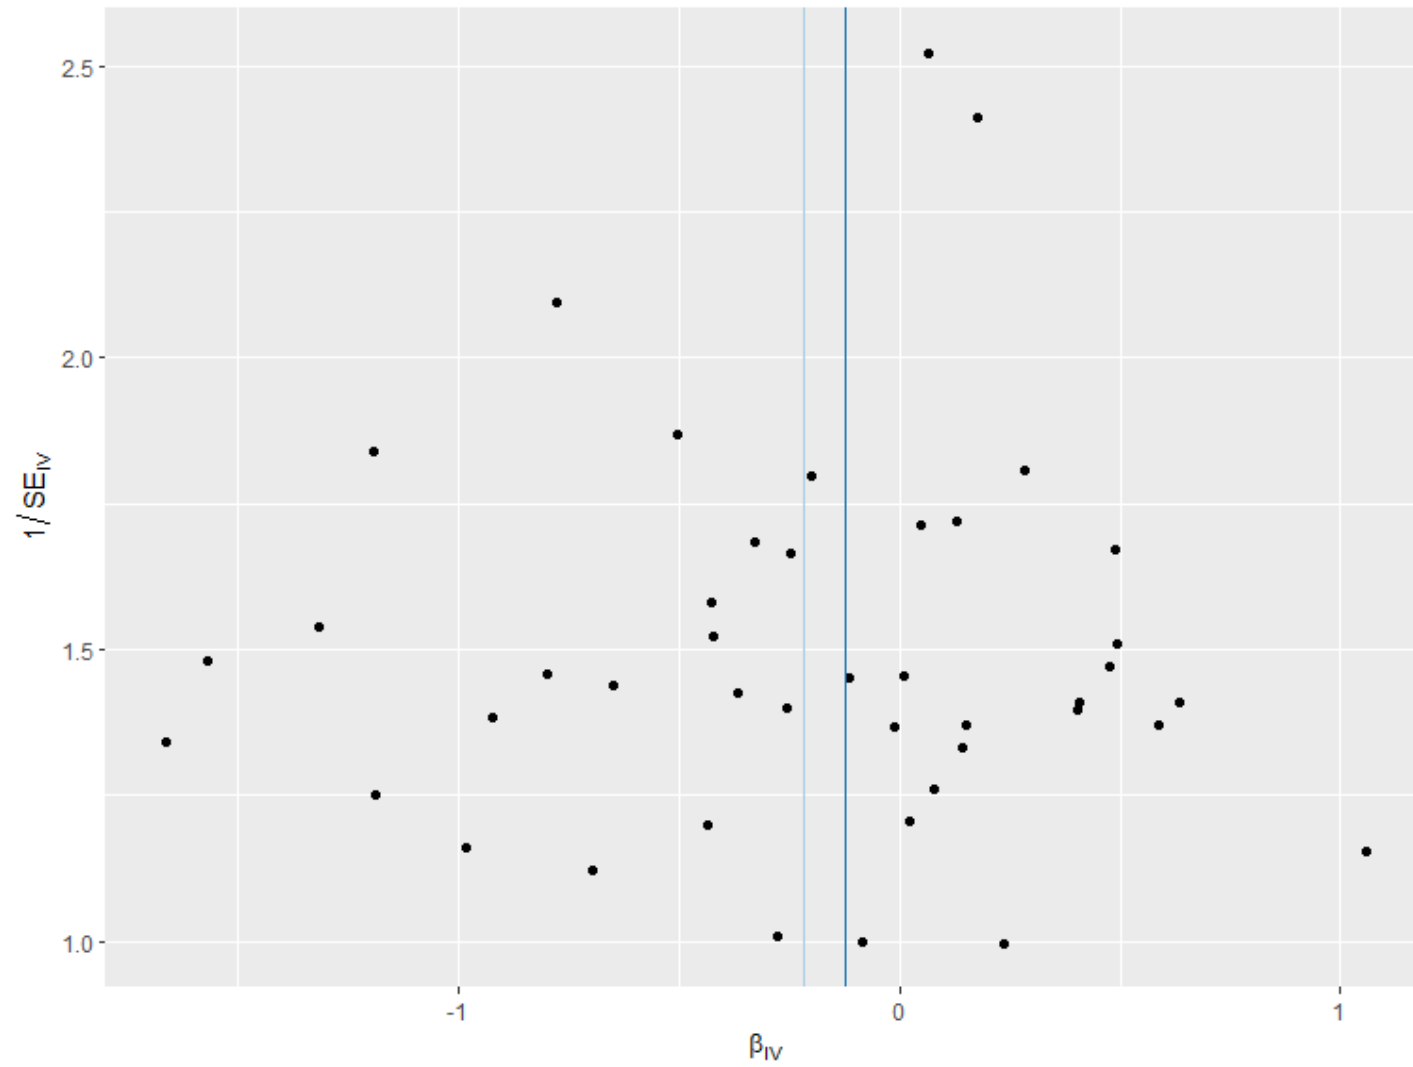

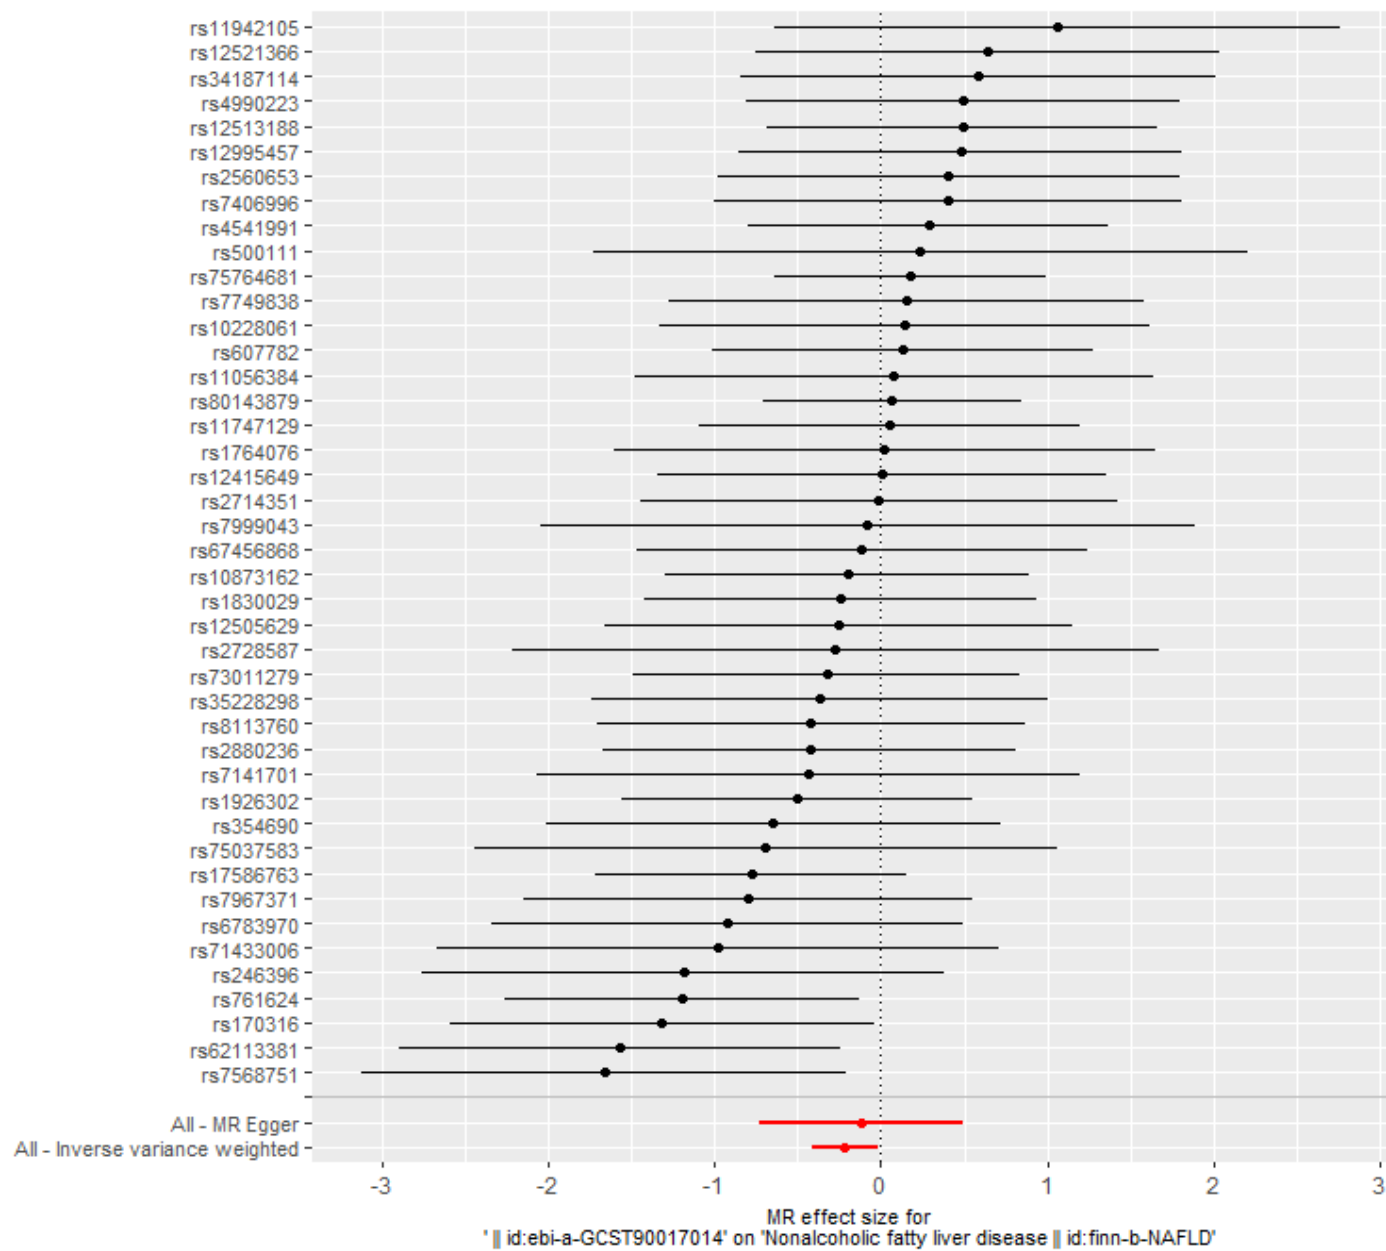

MR Test

- Inverse variance weighted
- MR Egger
- Simple mode
- Weighted median
- Weighted mode

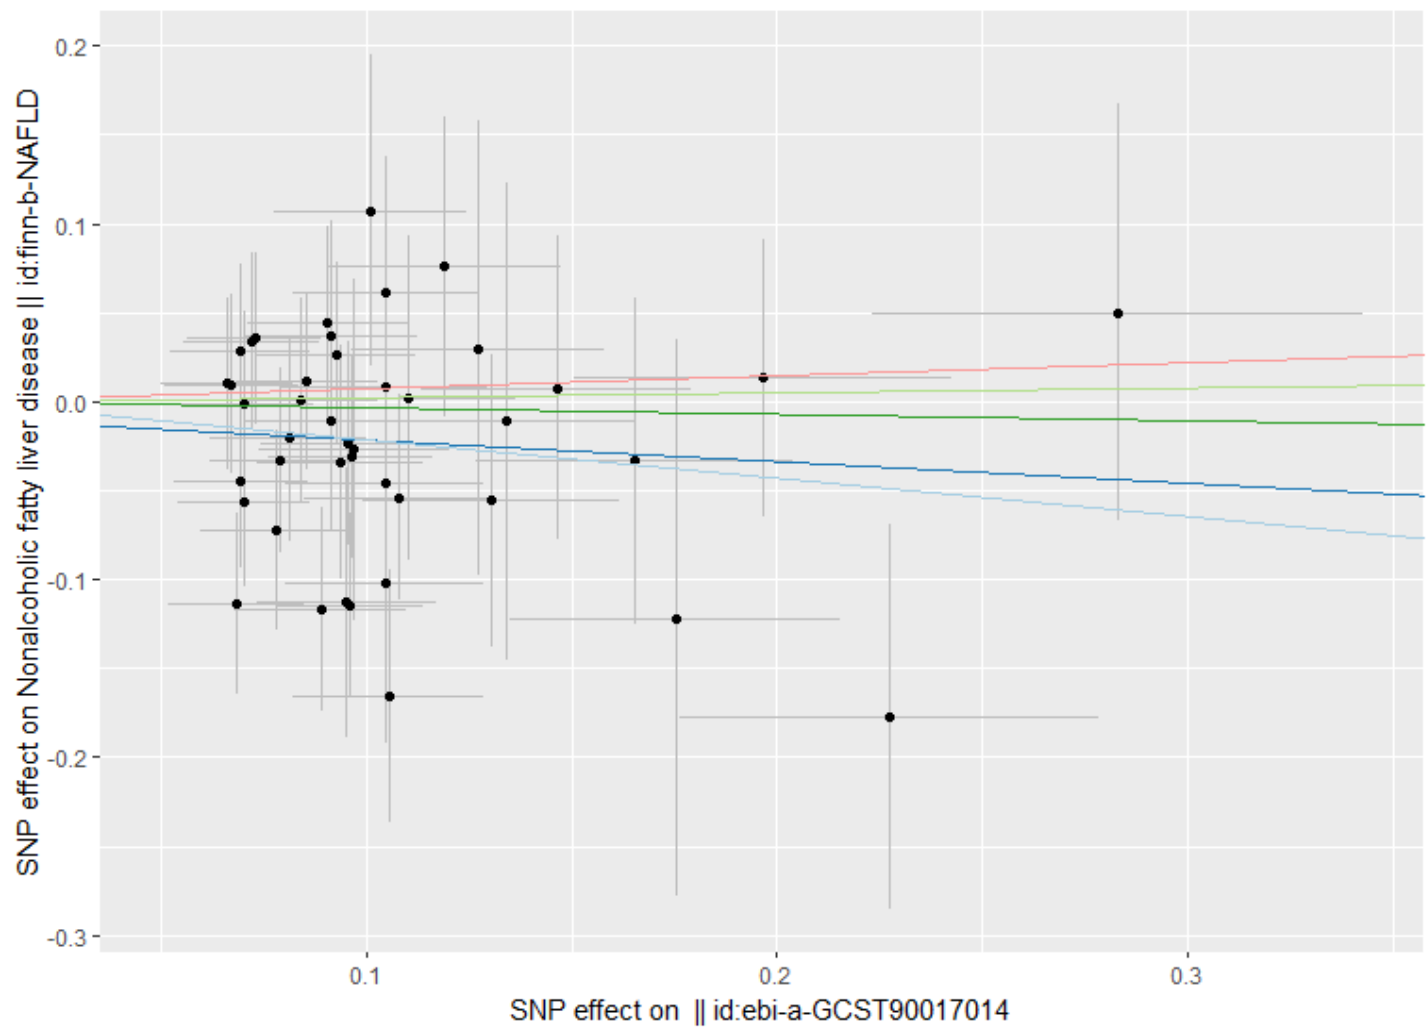

**Figure 158** Leave-one-out analysis, funnel plot, MR effect size and scatter plot for gut microbiota abundance (genus *Paraprevotella* id.962) on nonalcoholic fatty liver disease

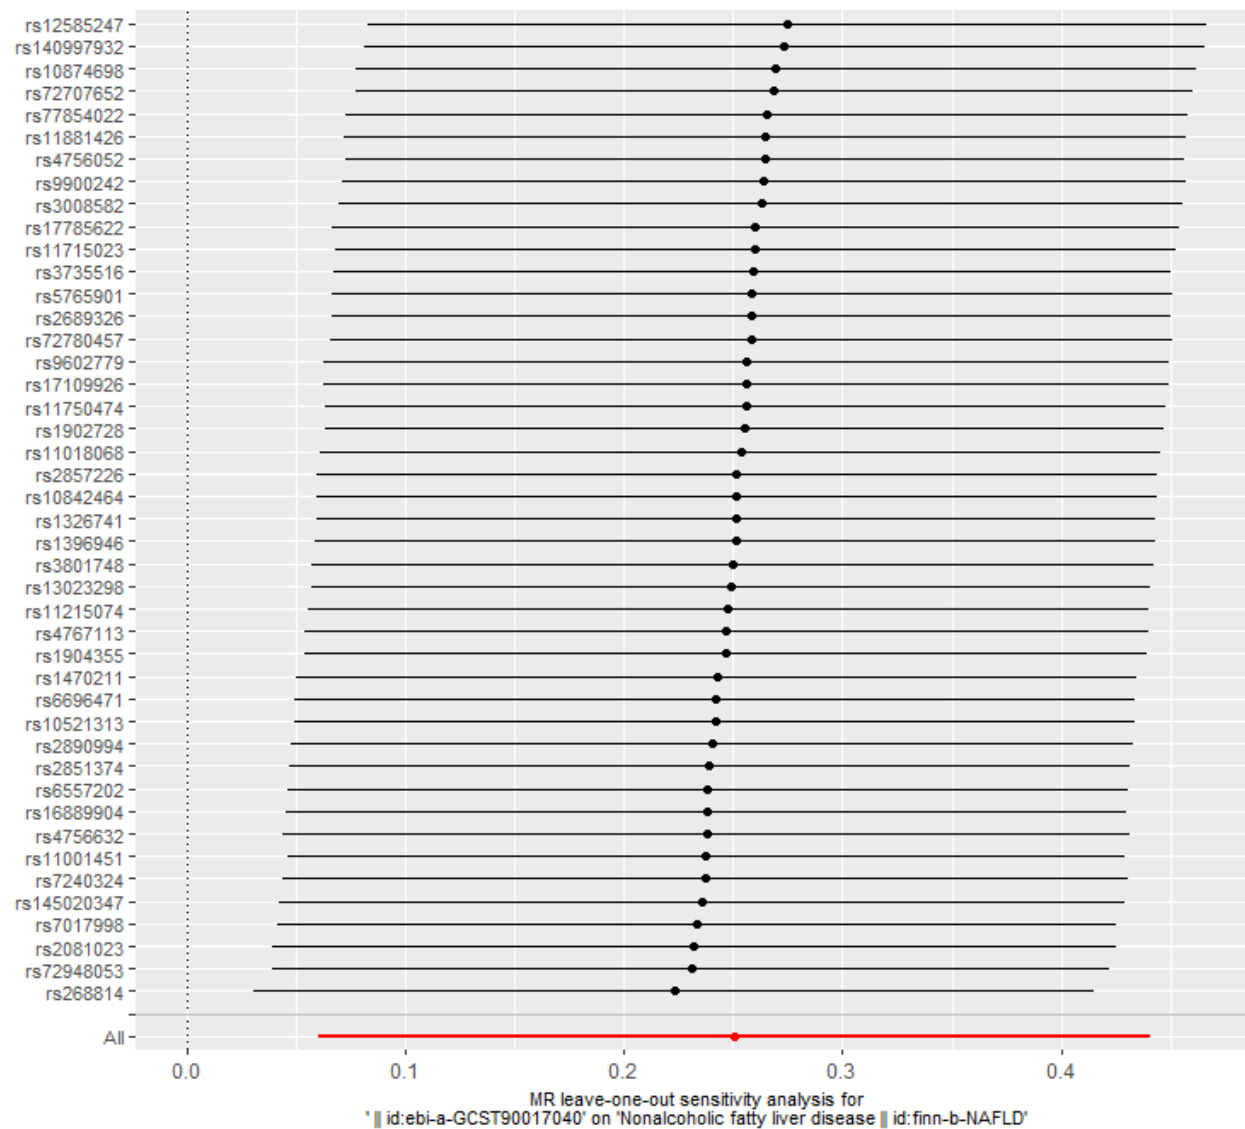

MR Method

- Inverse variance weighted
- MR Egger

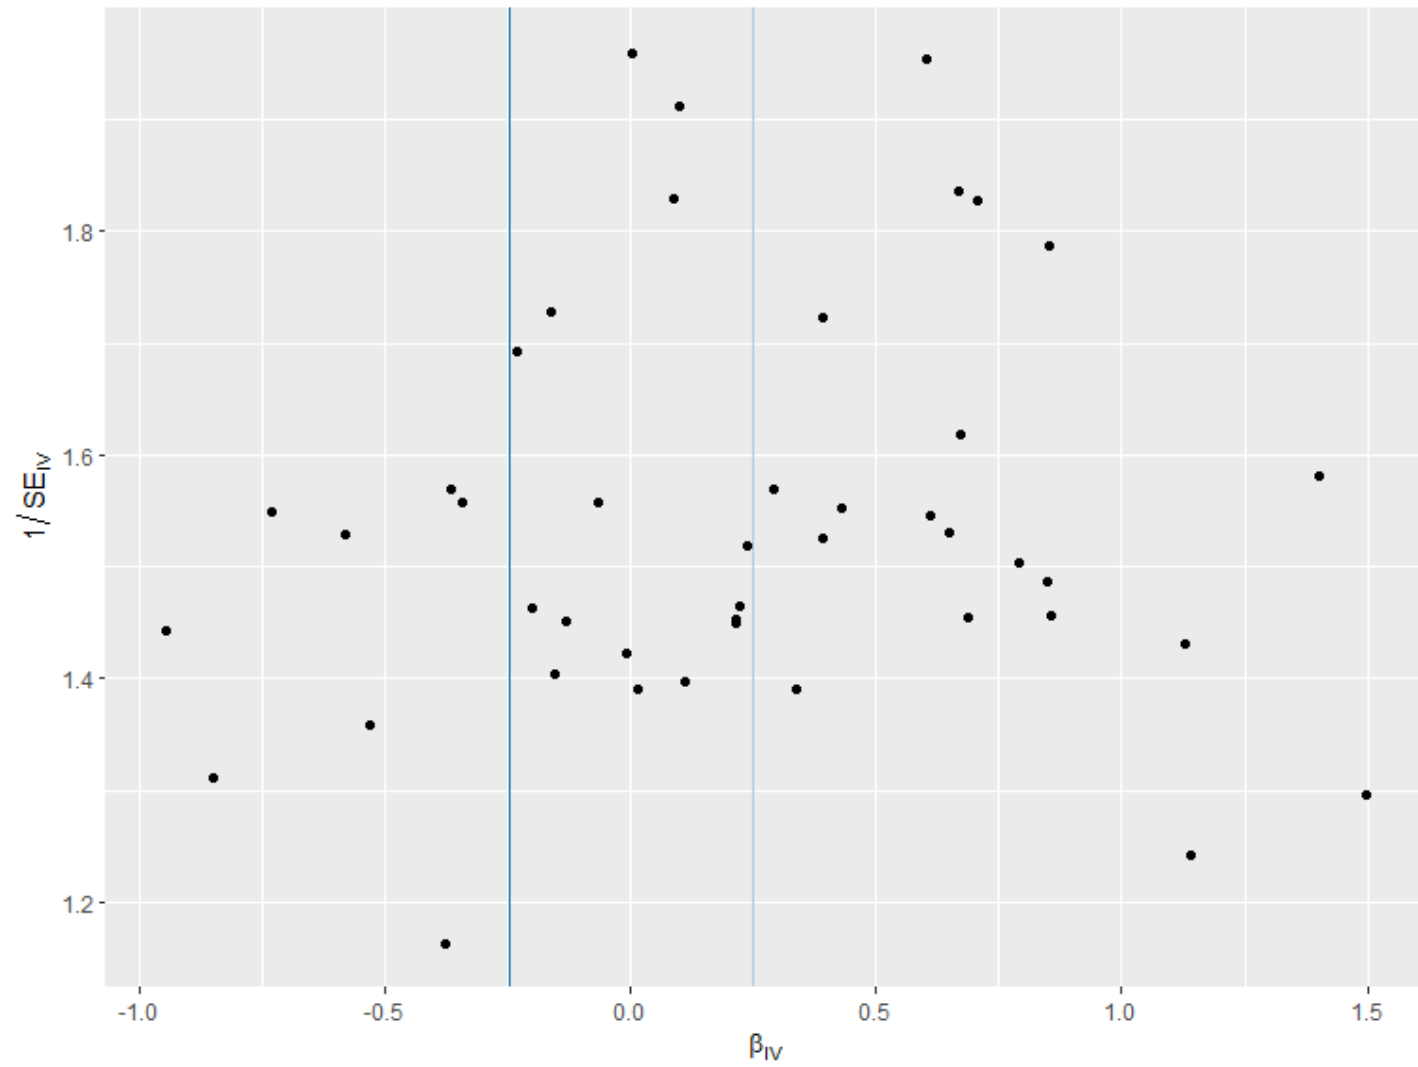

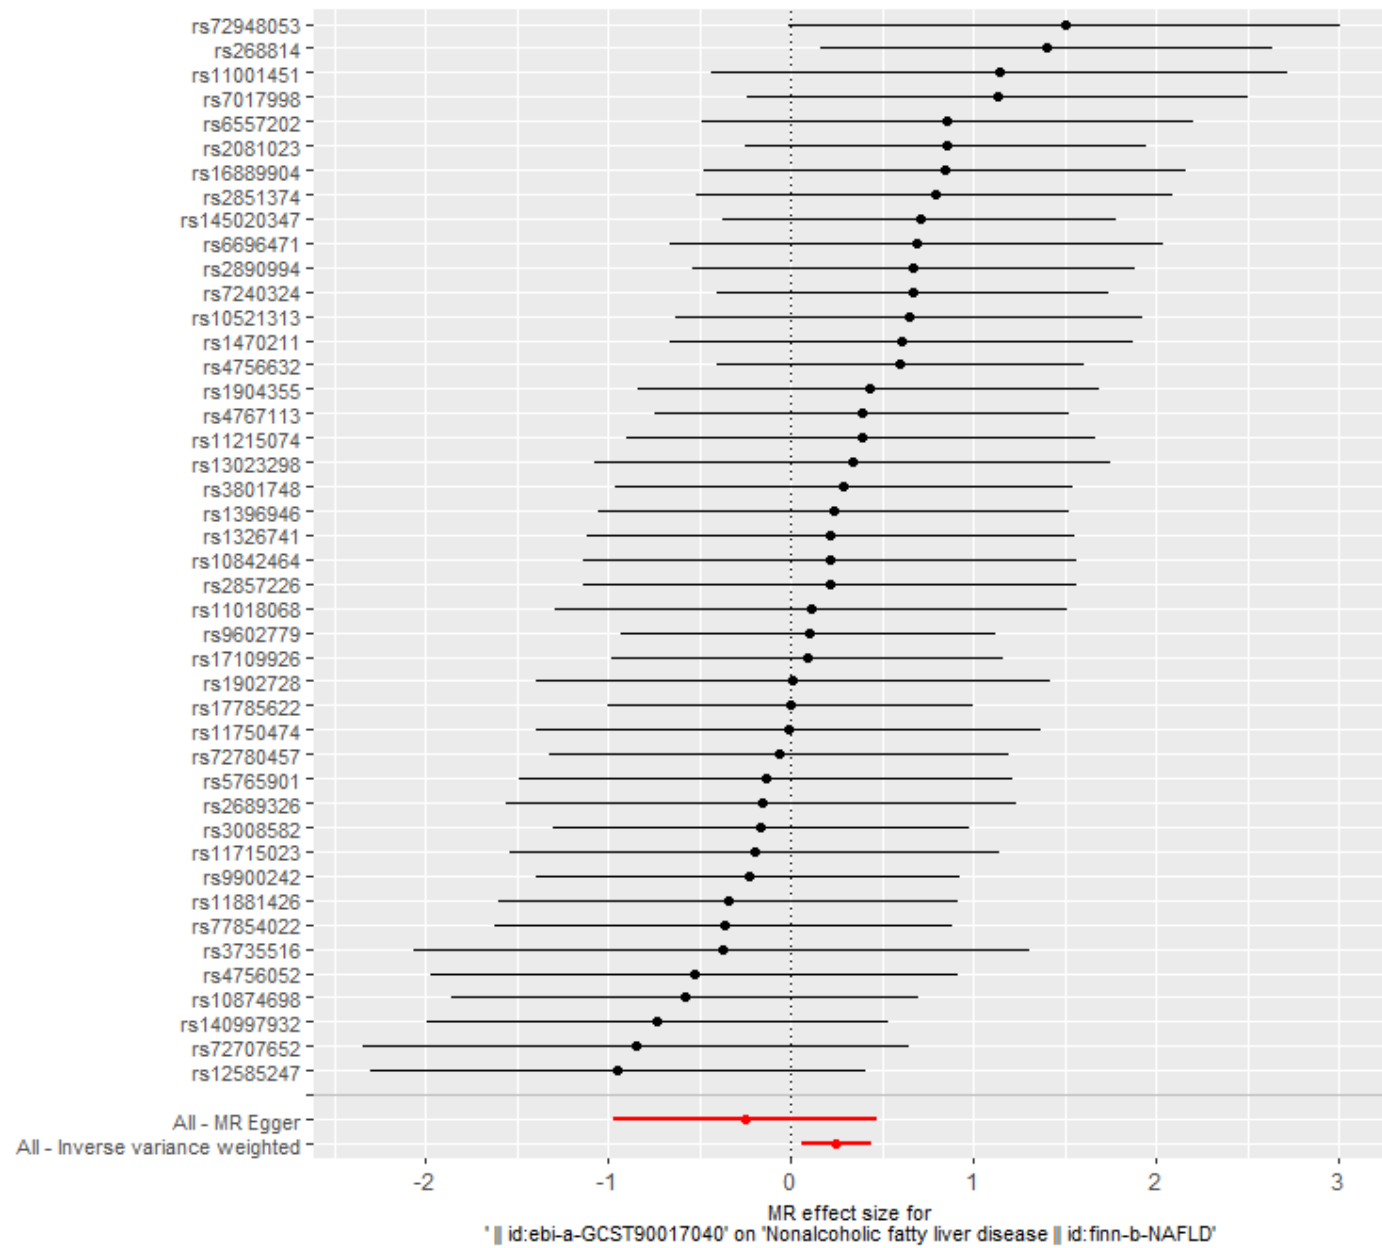

MR Test

- Inverse variance weighted
- MR Egger
- Simple mode
- Weighted median
- Weighted mode

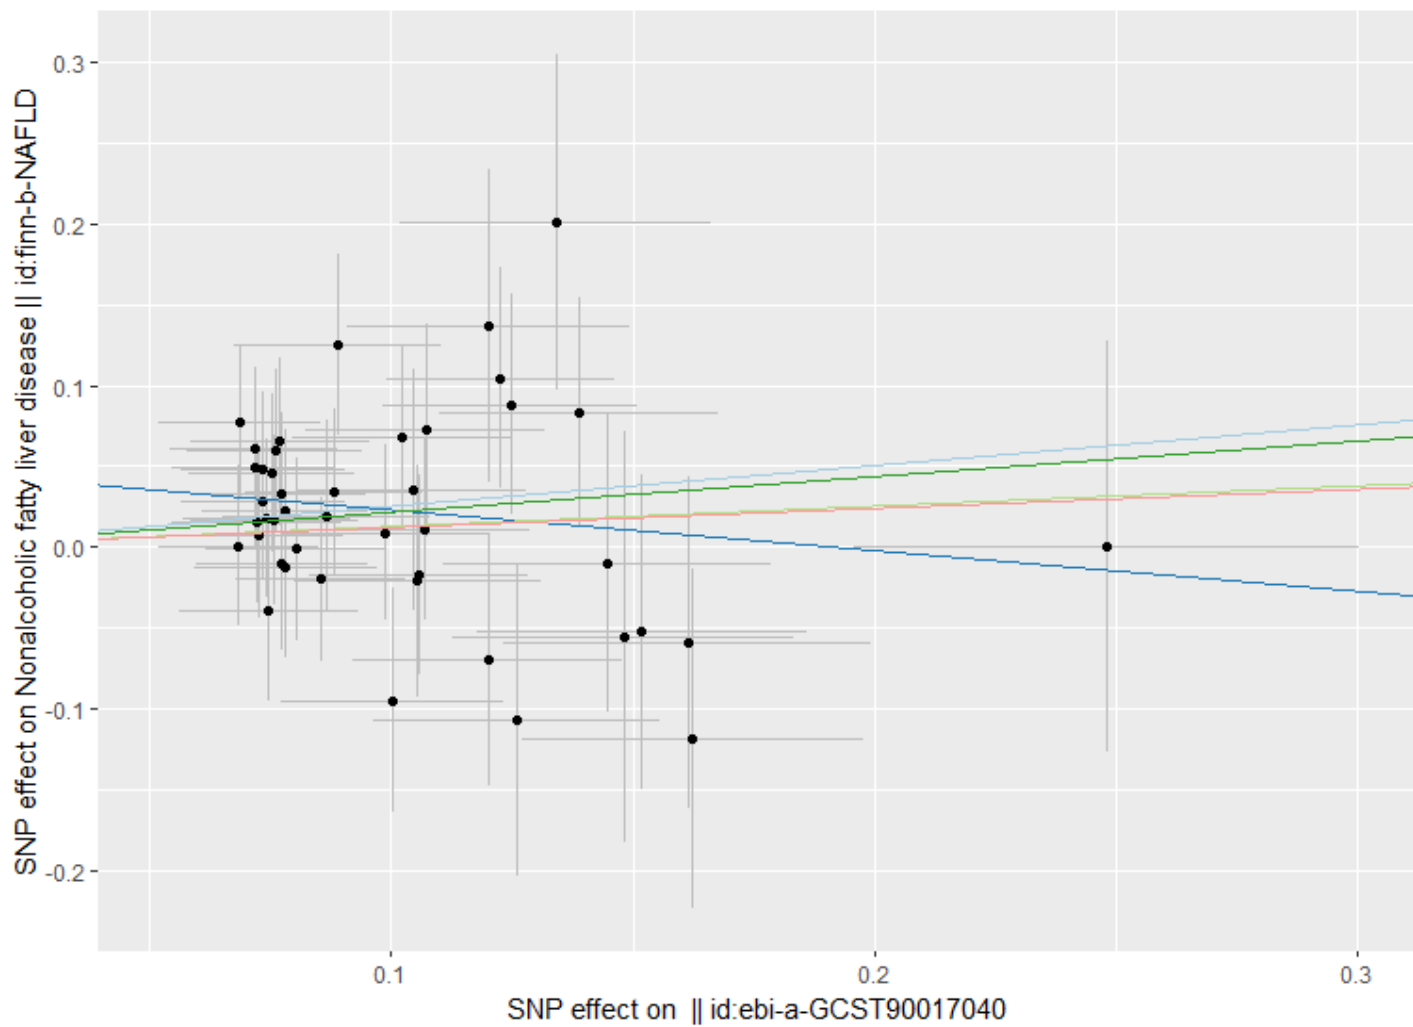



**Figure 159** Leave-one-out analysis, funnel plot, MR effect size and scatter plot for gut microbiota abundance (unknown genus id.1000006162) on nonalcoholic fatty liver disease

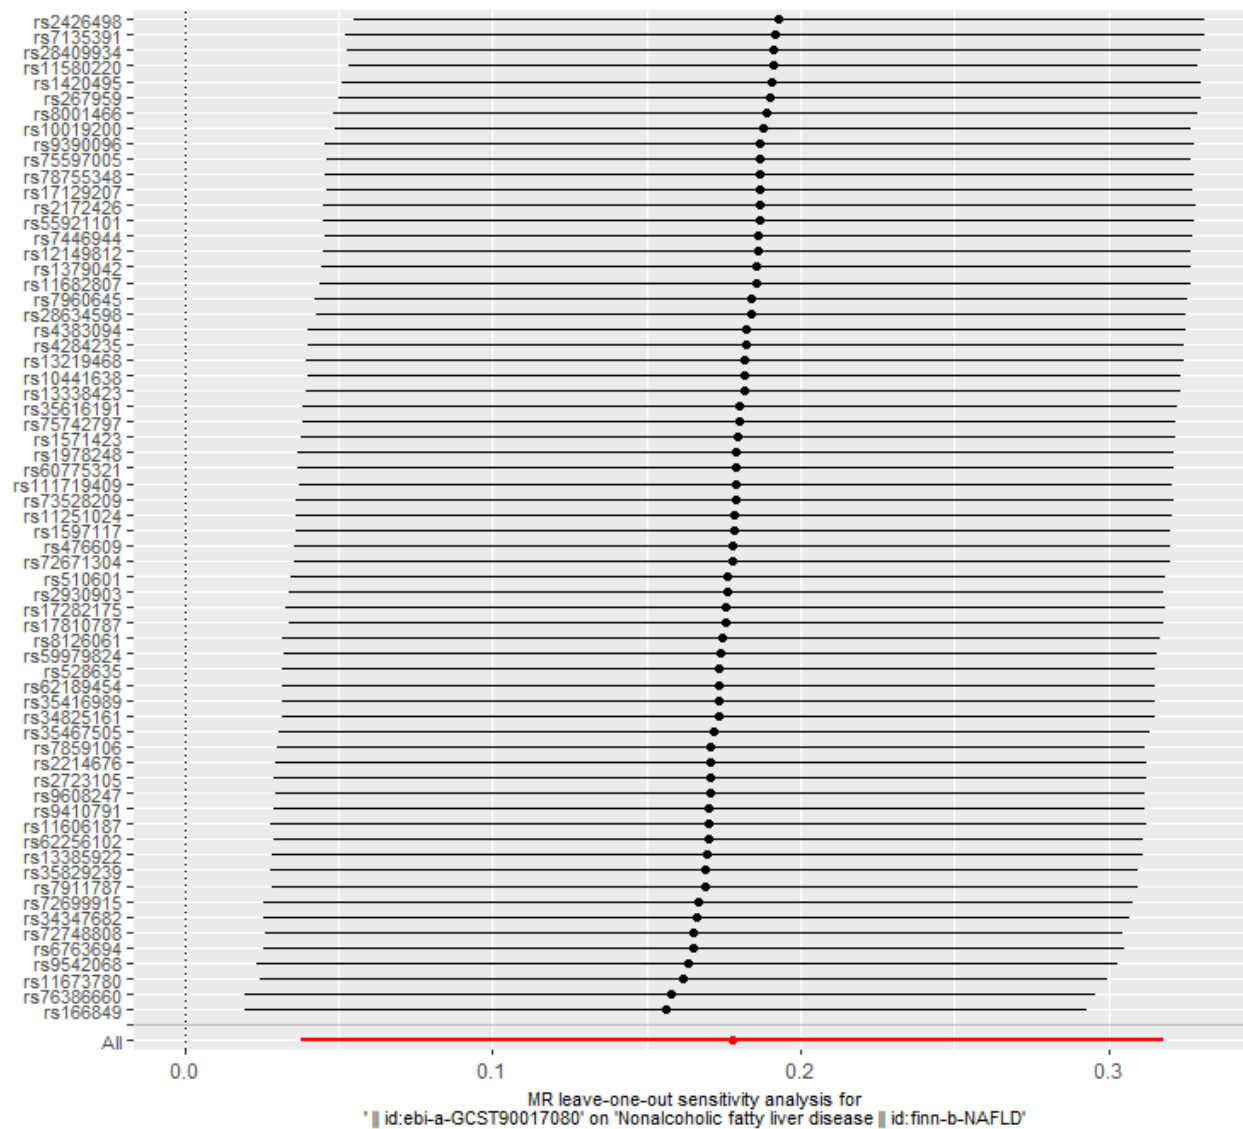

MR Method

- Inverse variance weighted
- MR Egger

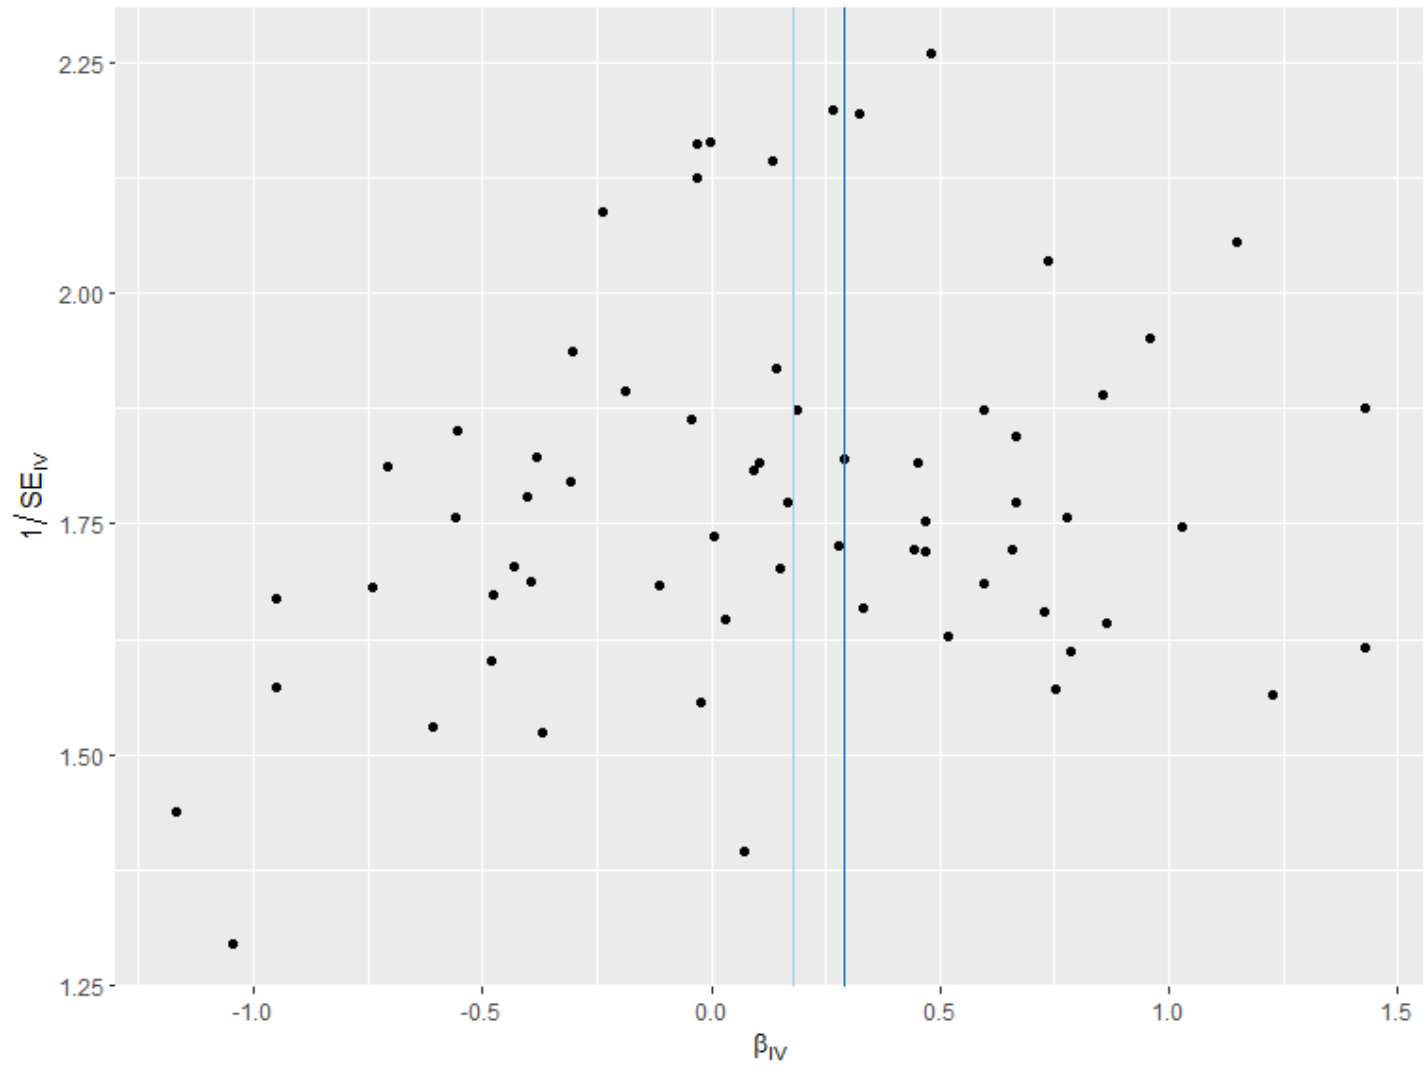

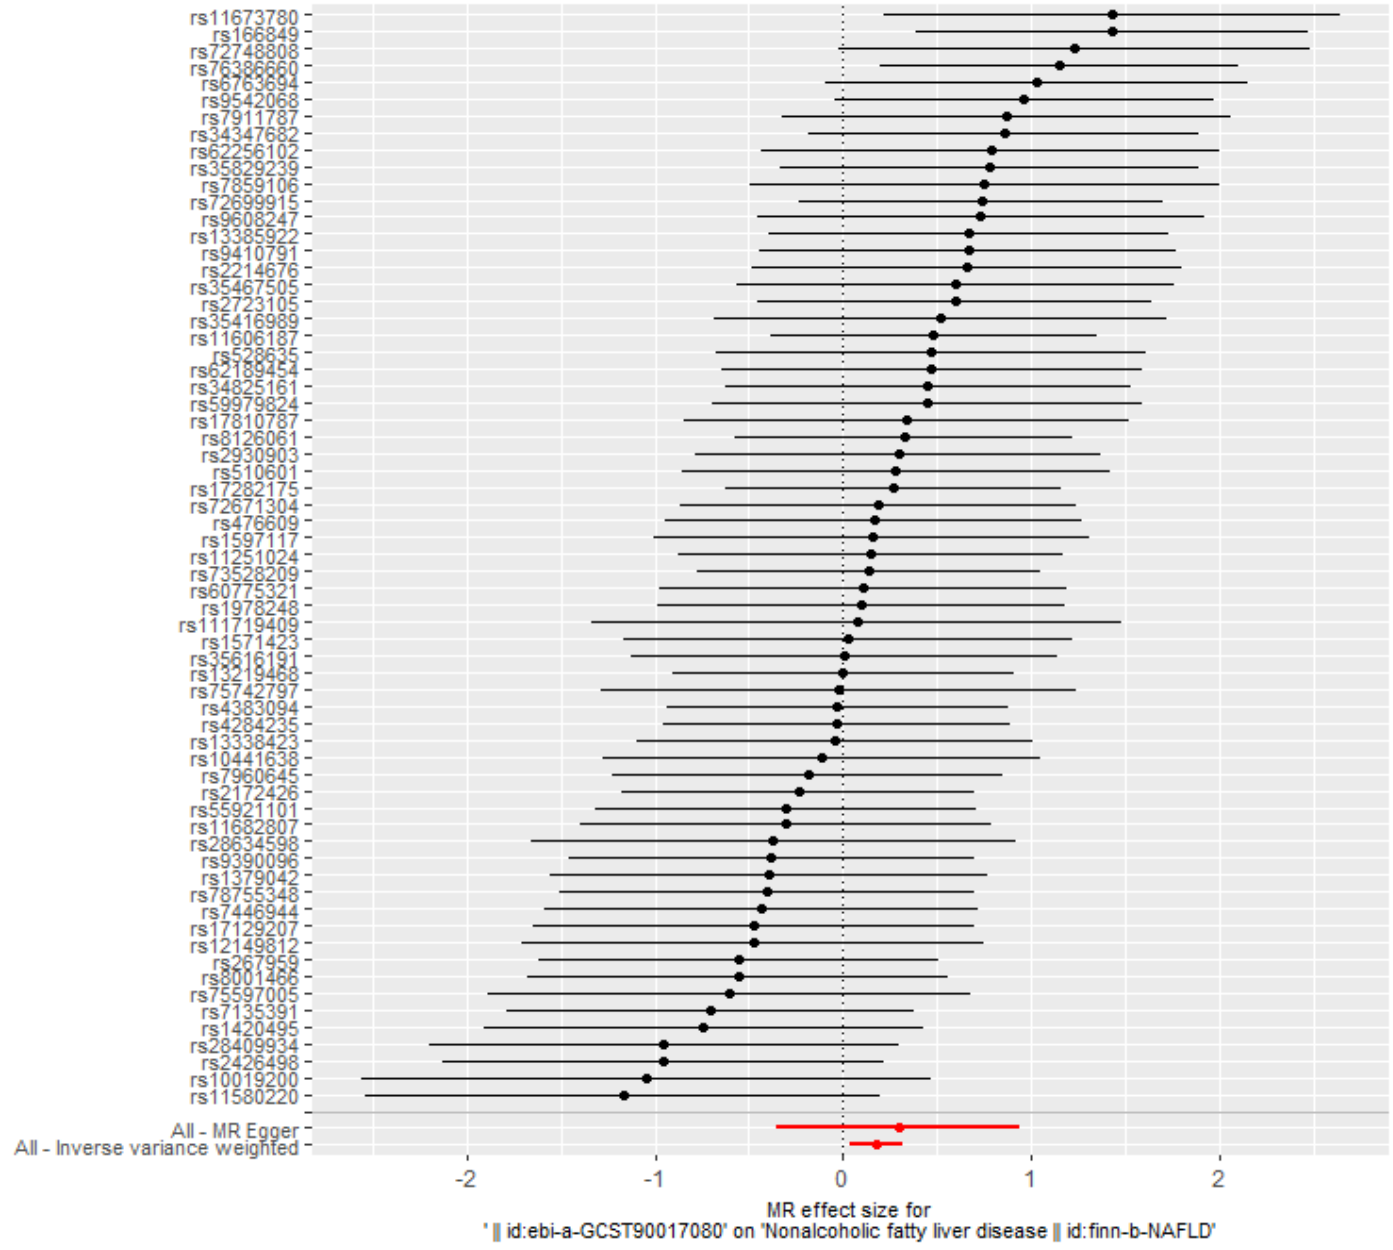

MR Test

- Inverse variance weighted
- MR Egger
- Simple mode
- Weighted median
- Weighted mode

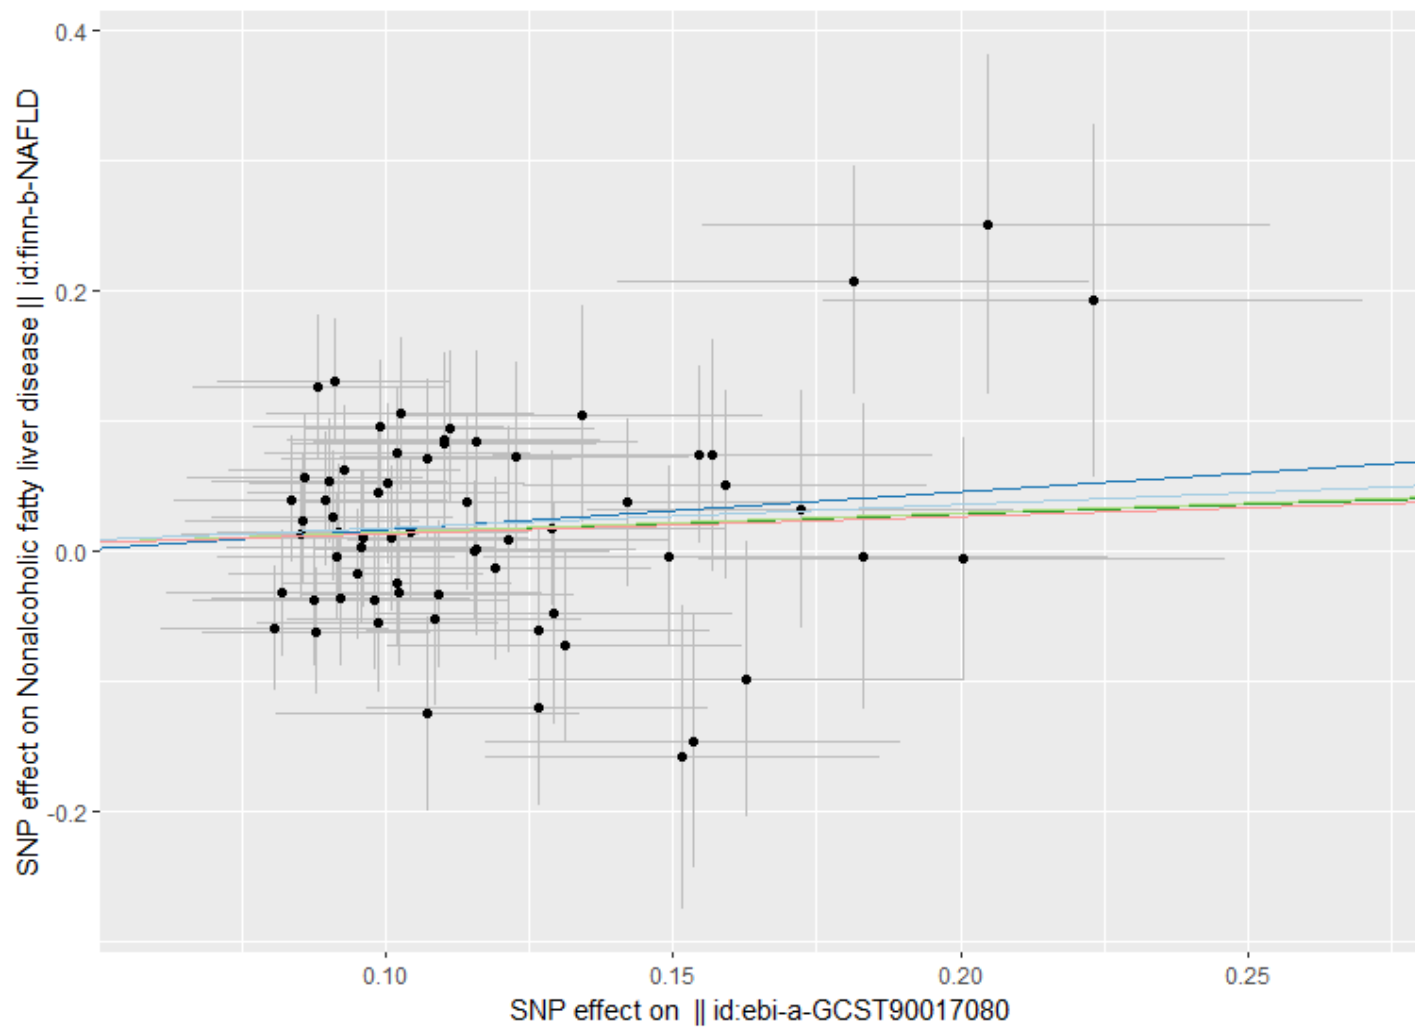

**Figure 160** Leave-one-out analysis, funnel plot, MR effect size and scatter plot for gut microbiota abundance (unknown genus id.959) on nonalcoholic fatty liver disease

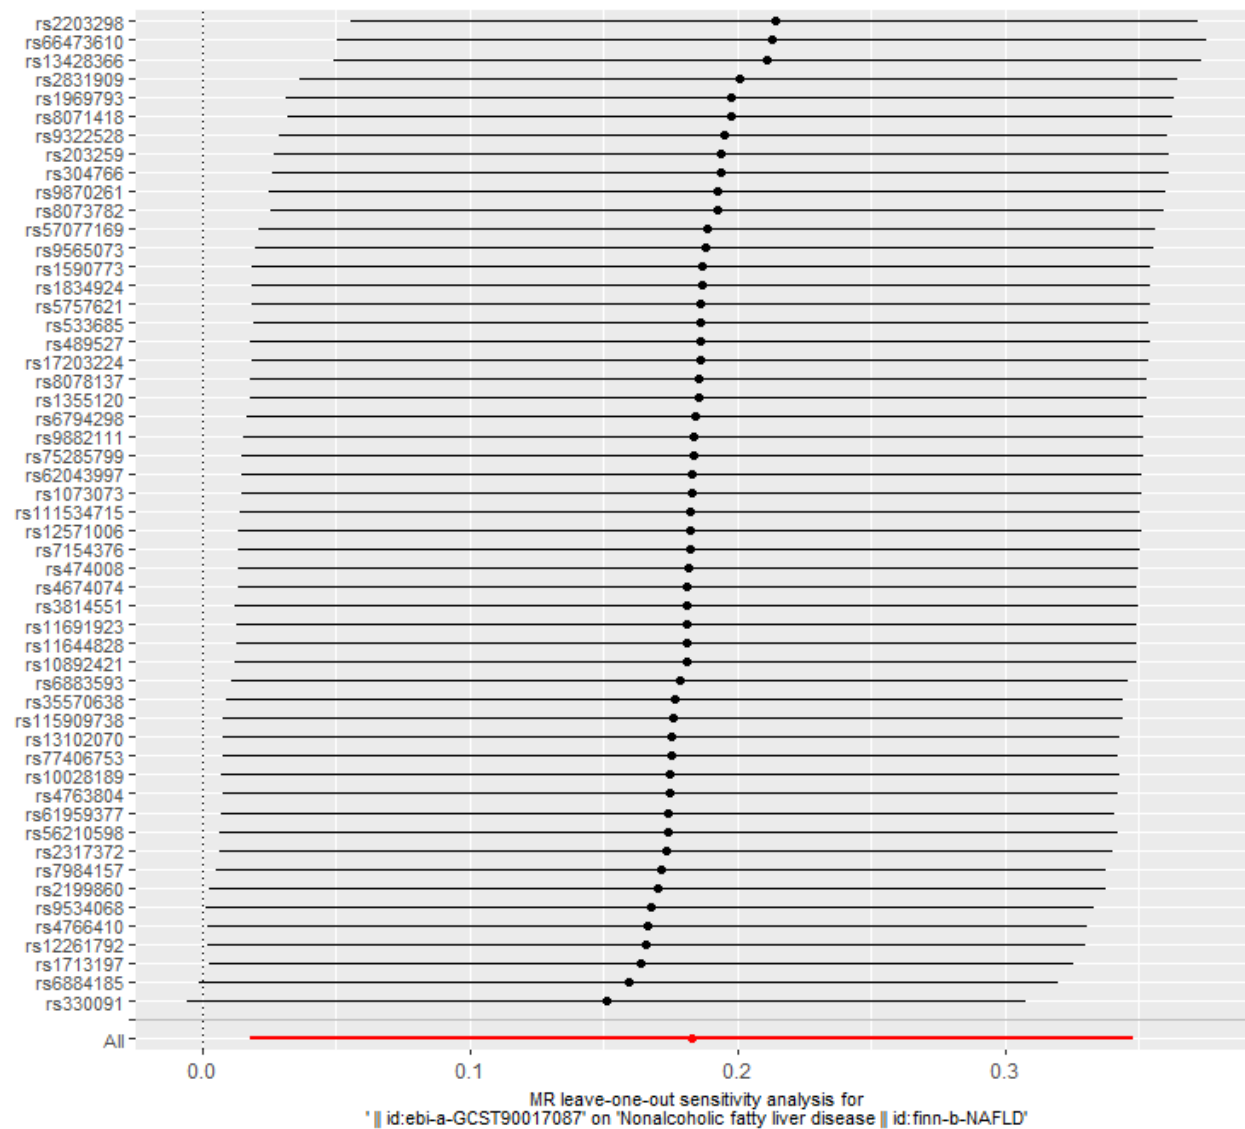

MR Method

- Inverse variance weighted
- MR Egger

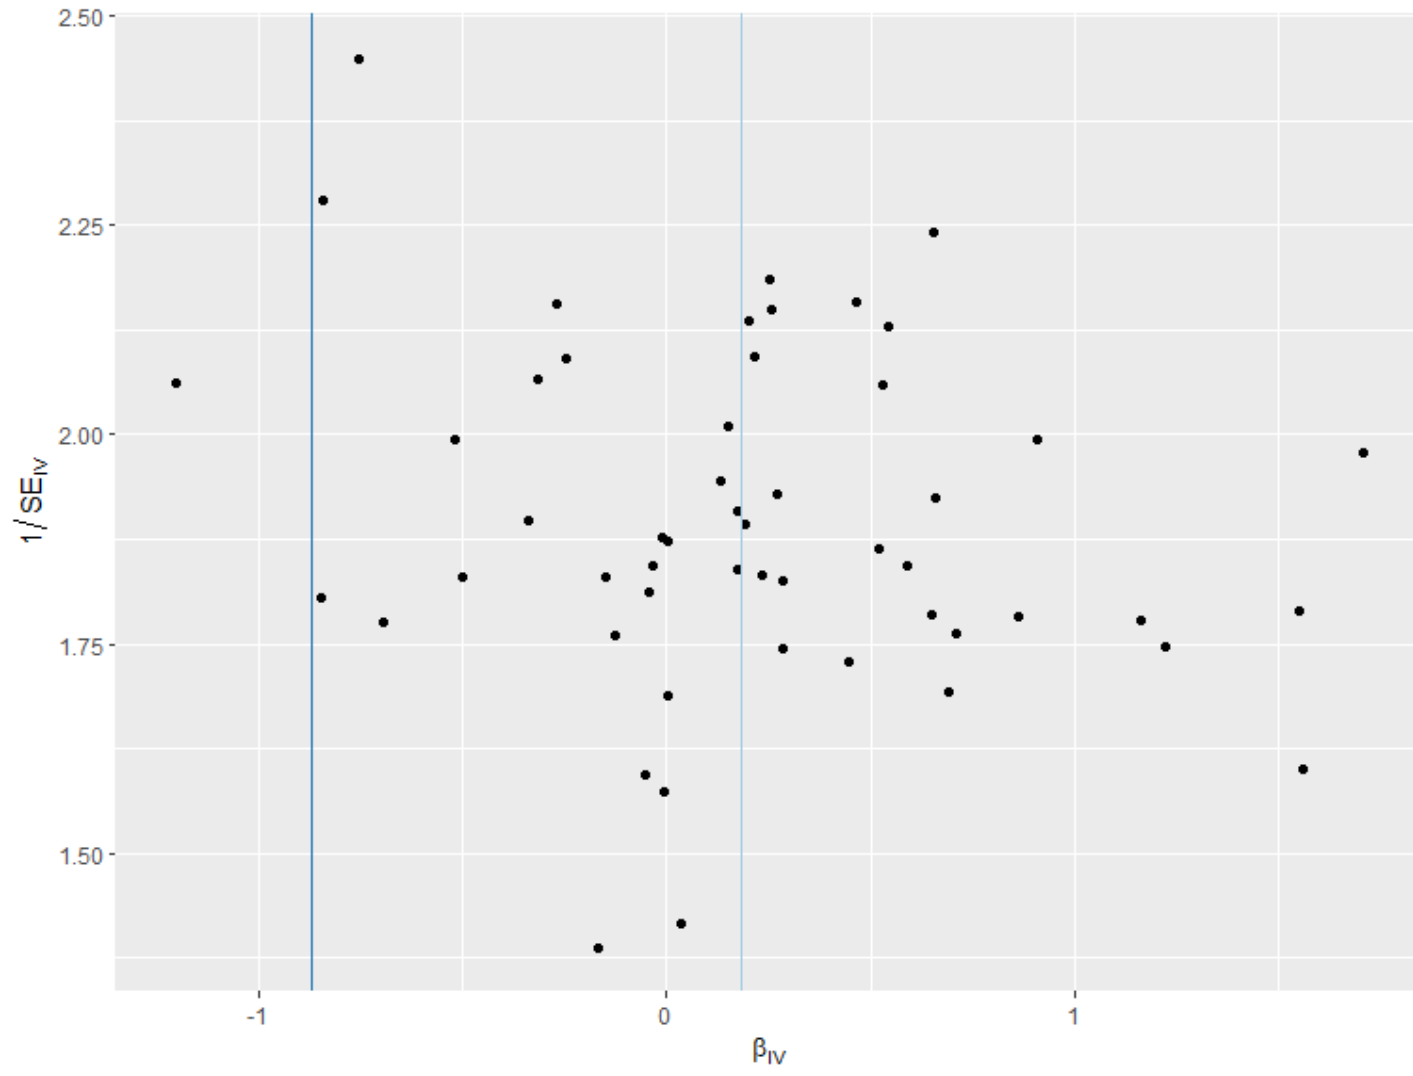

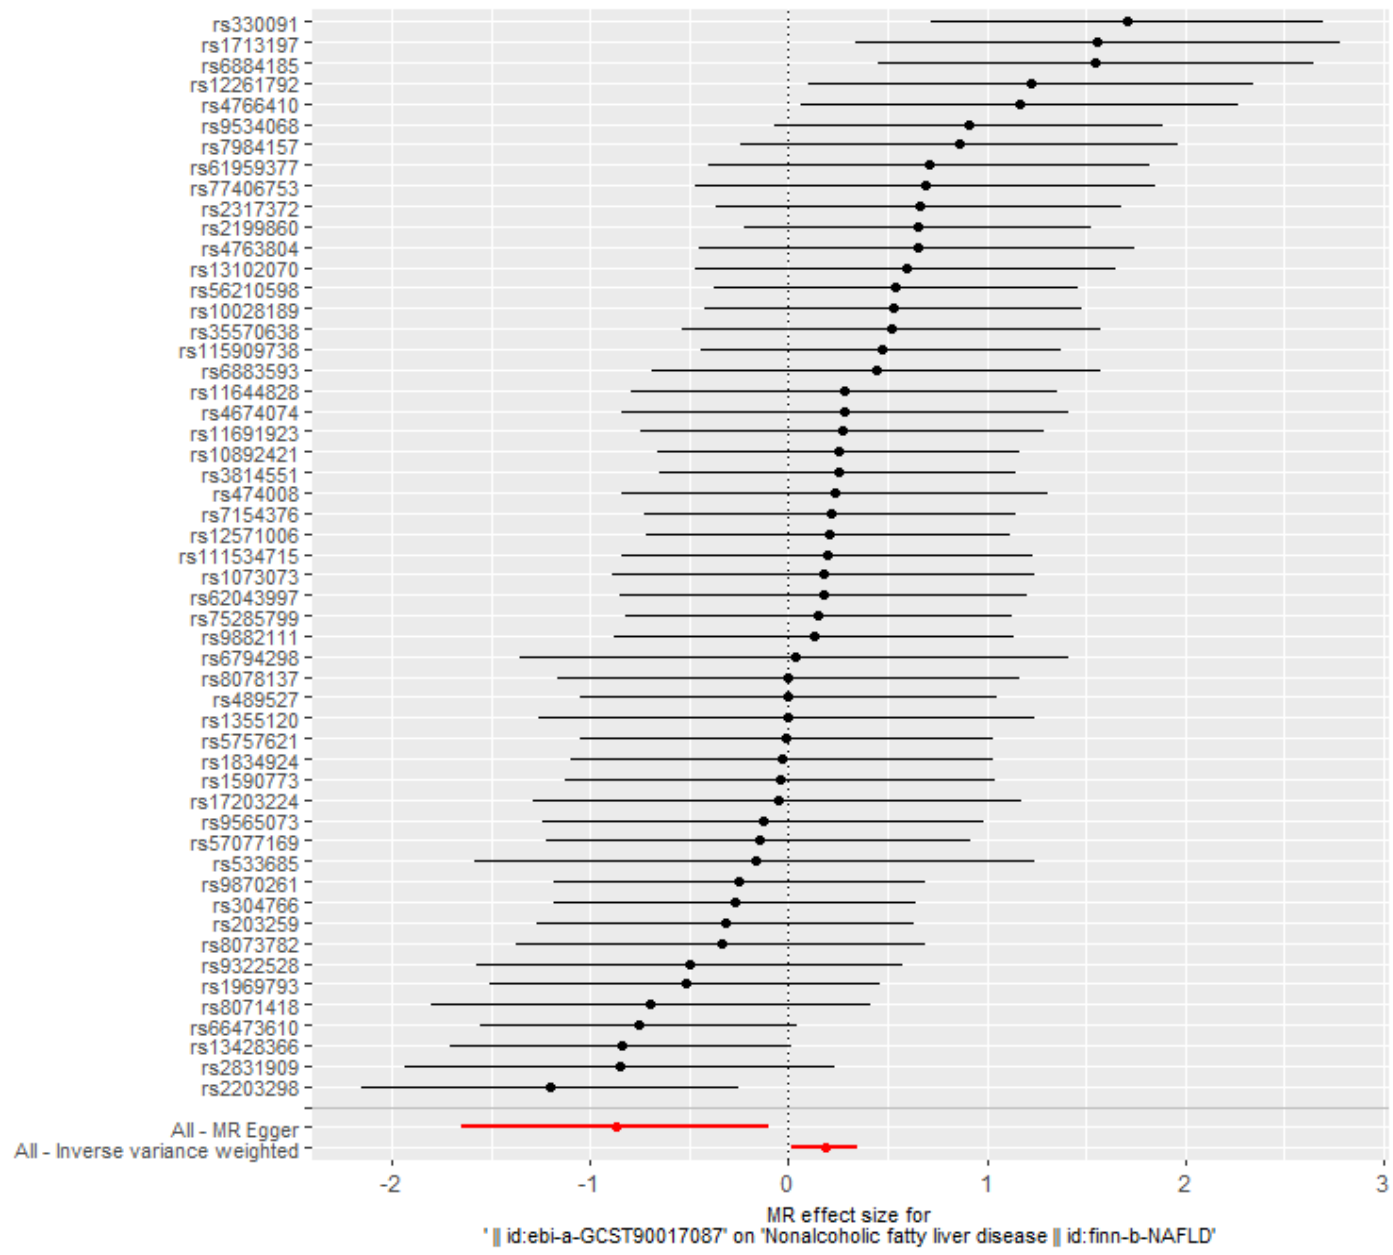

MR Test

- Inverse variance weighted
- MR Egger
- Simple mode
- Weighted median
- Weighted mode

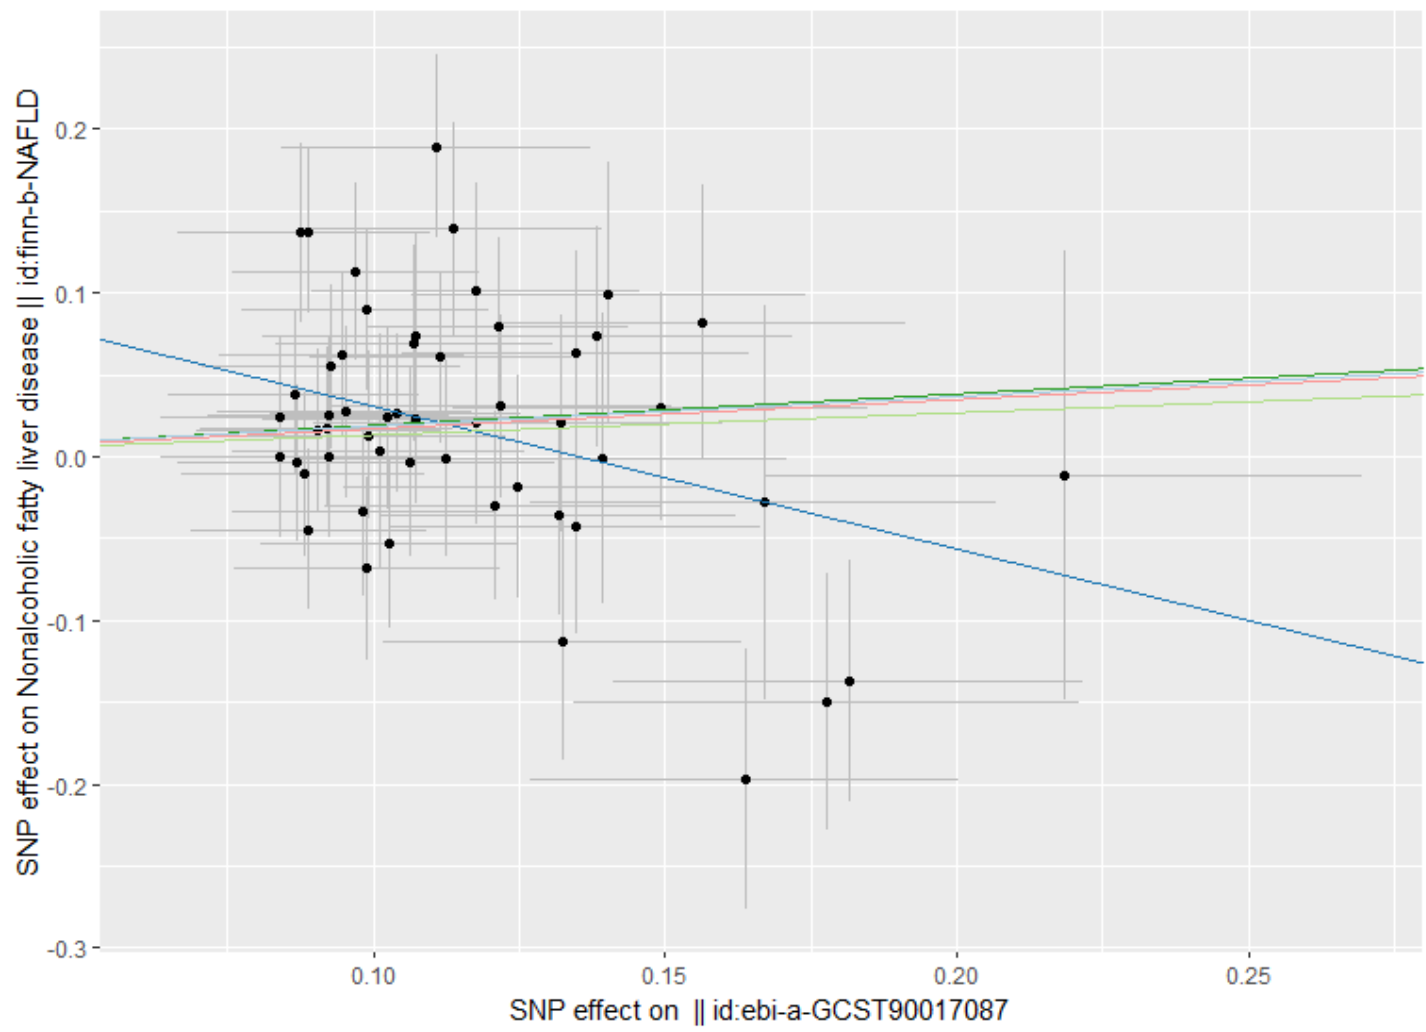



**Figure 161** Leave-one-out analysis, funnel plot, MR effect size and scatter plot for gut microbiota abundance (order NB1n id.3953) on nonalcoholic fatty liver disease

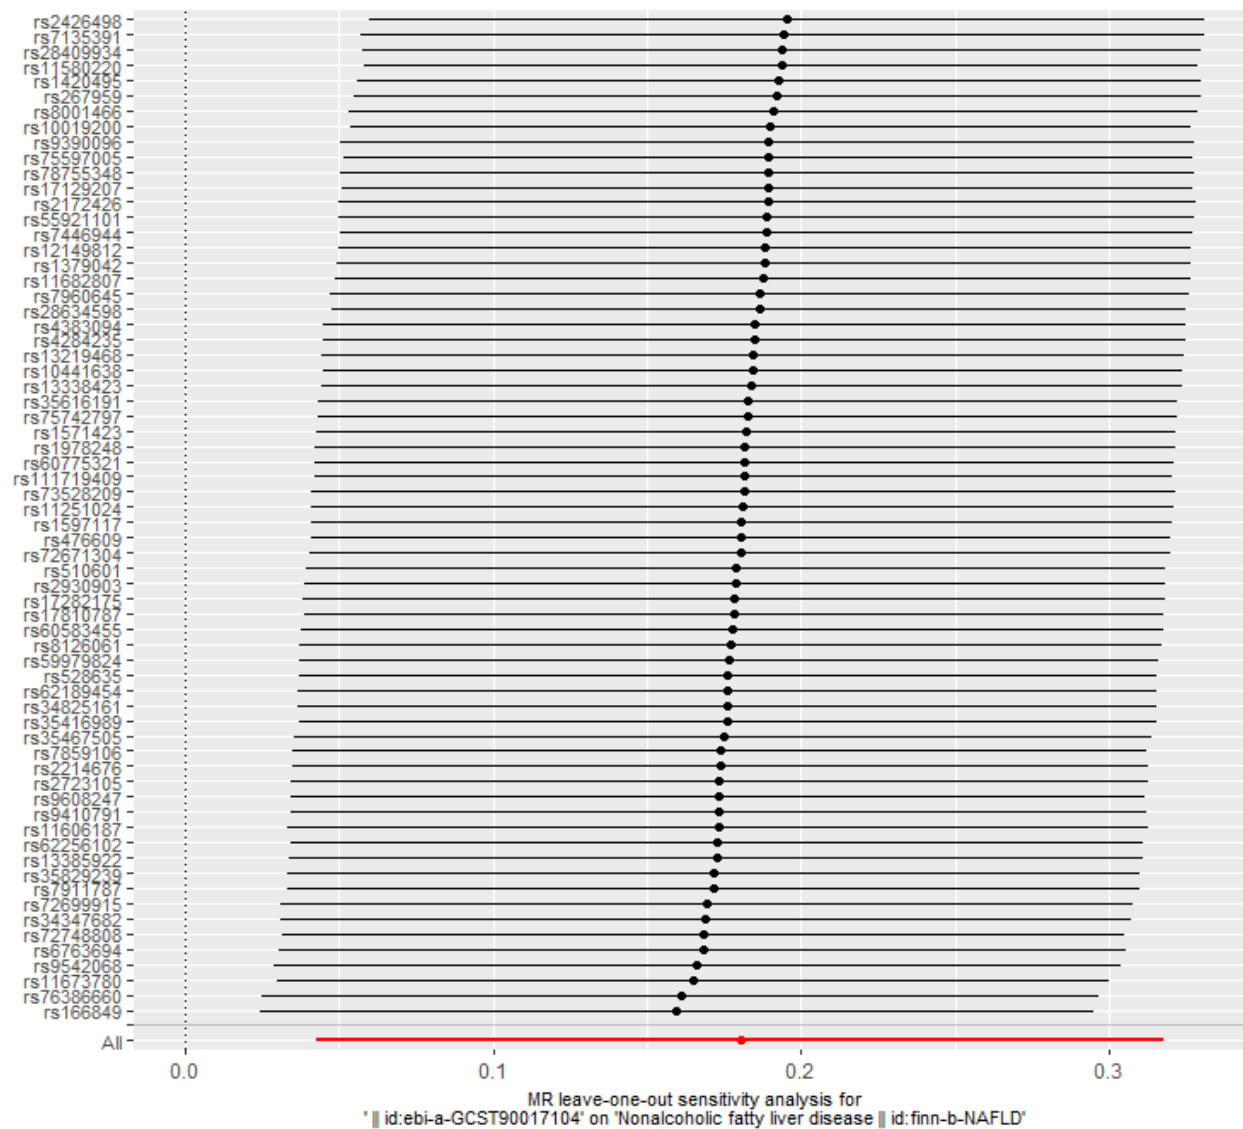

MR Method

- Inverse variance weighted
- MR Egger

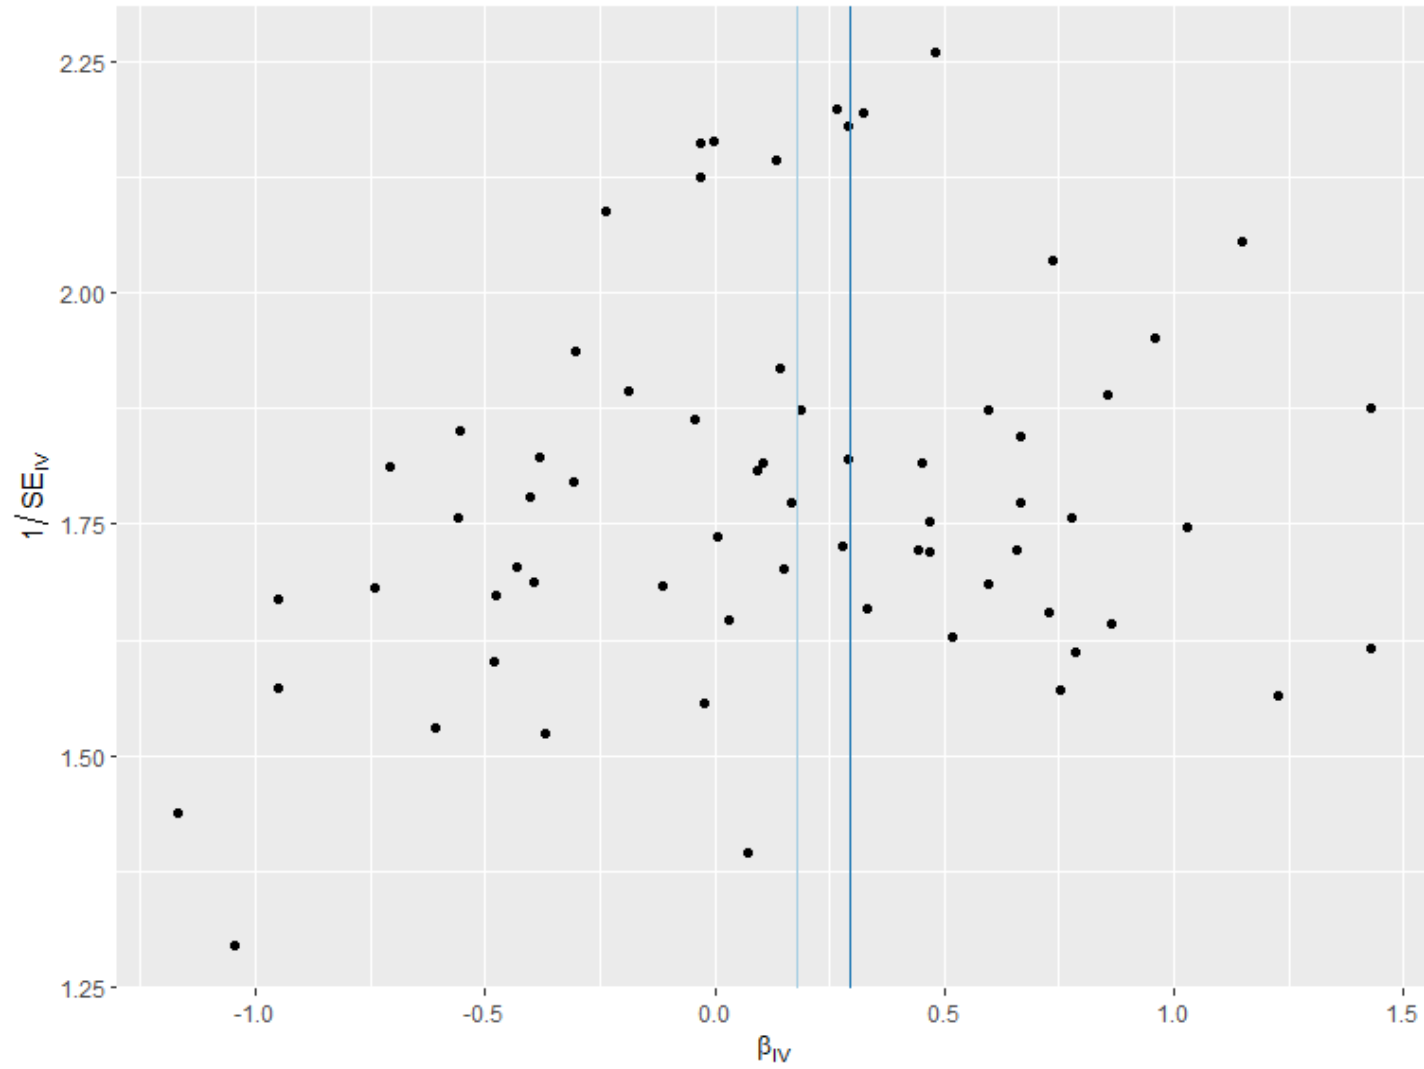

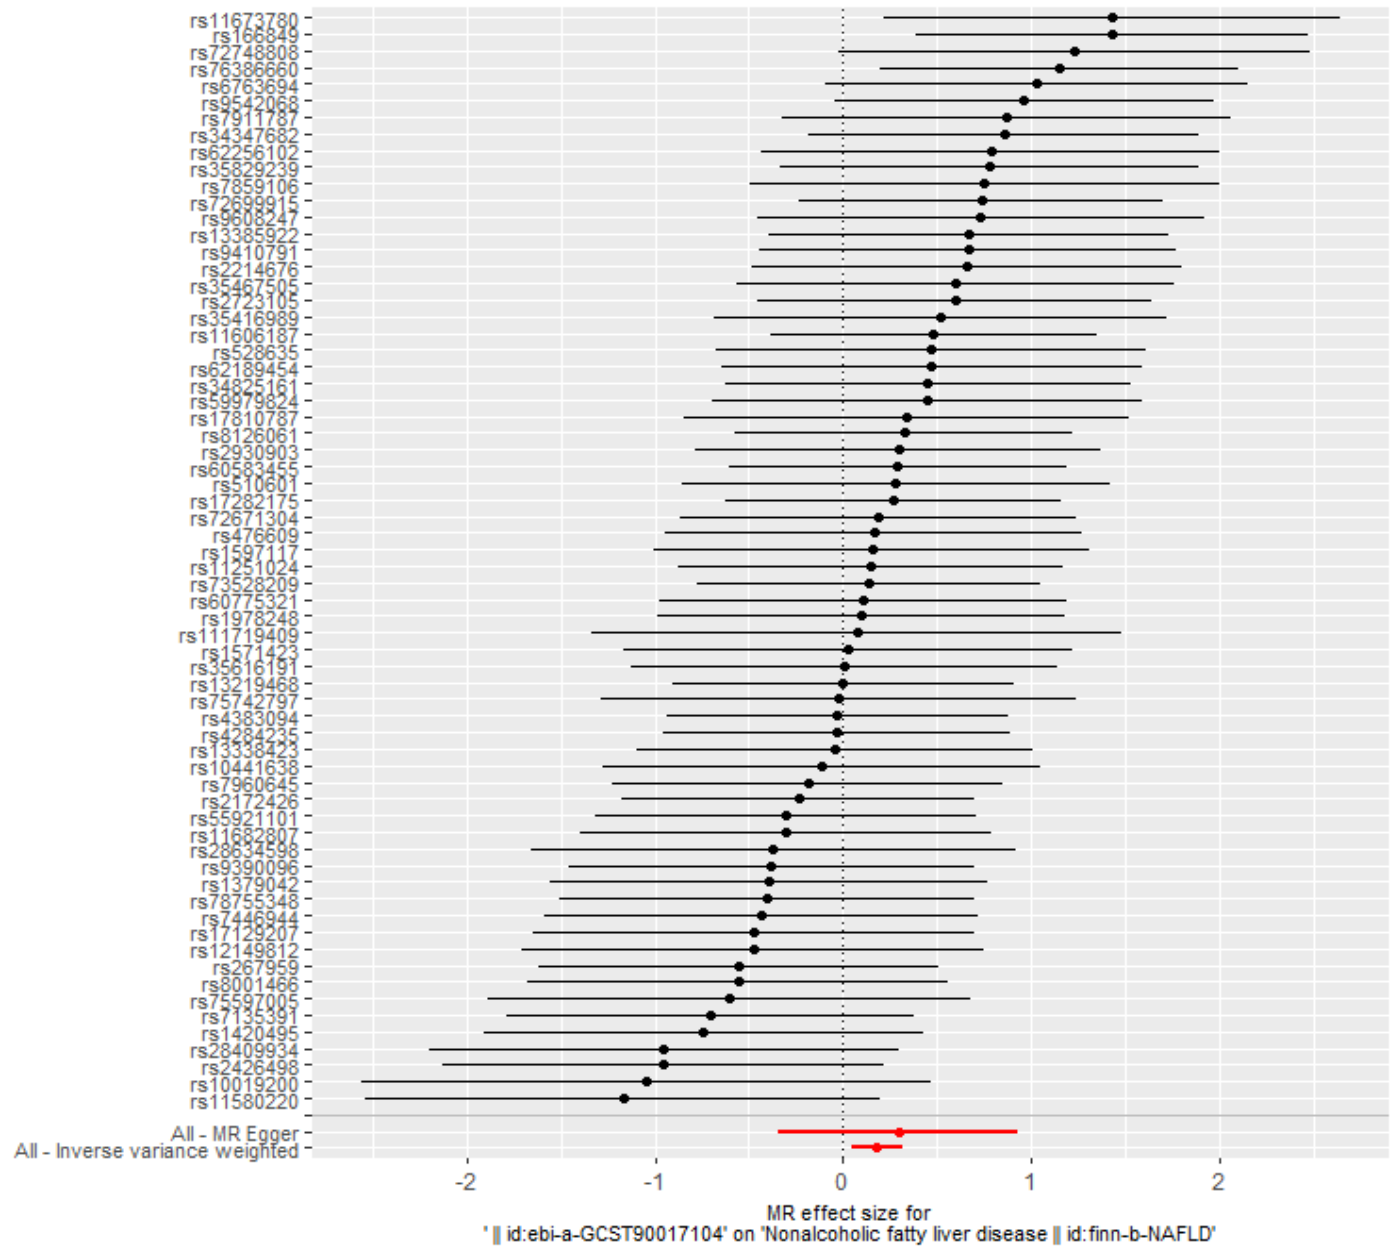

MR Test

- Inverse variance weighted
- MR Egger
- Simple mode
- Weighted median
- Weighted mode

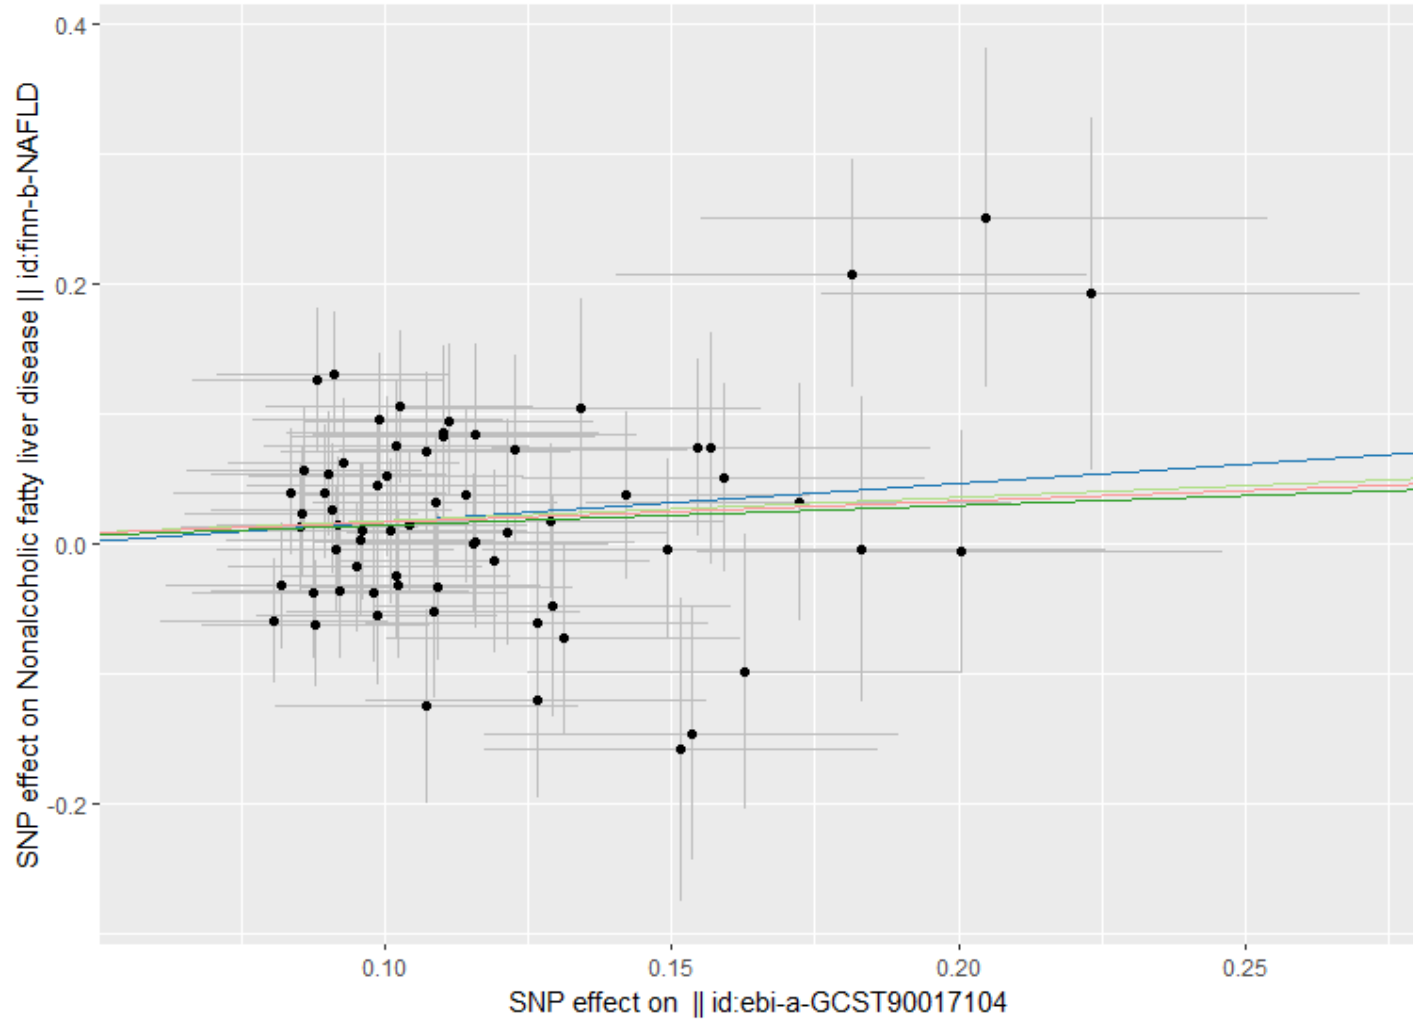

**Figure 162** Leave-one-out analysis, funnel plot, MR effect size and scatter plot for gut microbiota abundance (class Gammaproteobacteria id.3303) on alcoholic liver disease

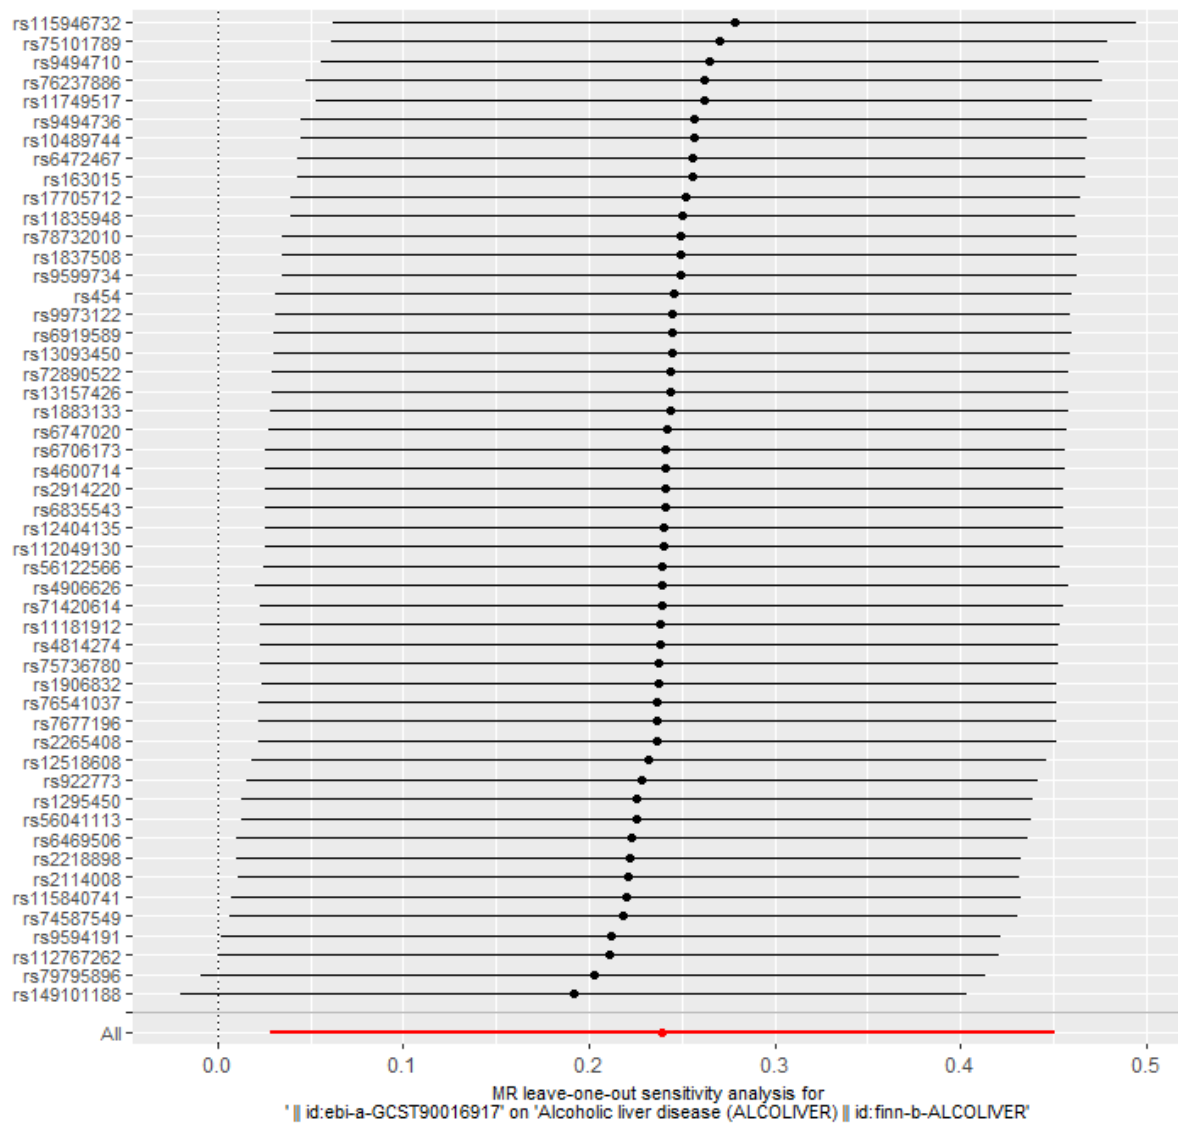

MR Method

- Inverse variance weighted
- MR Egger

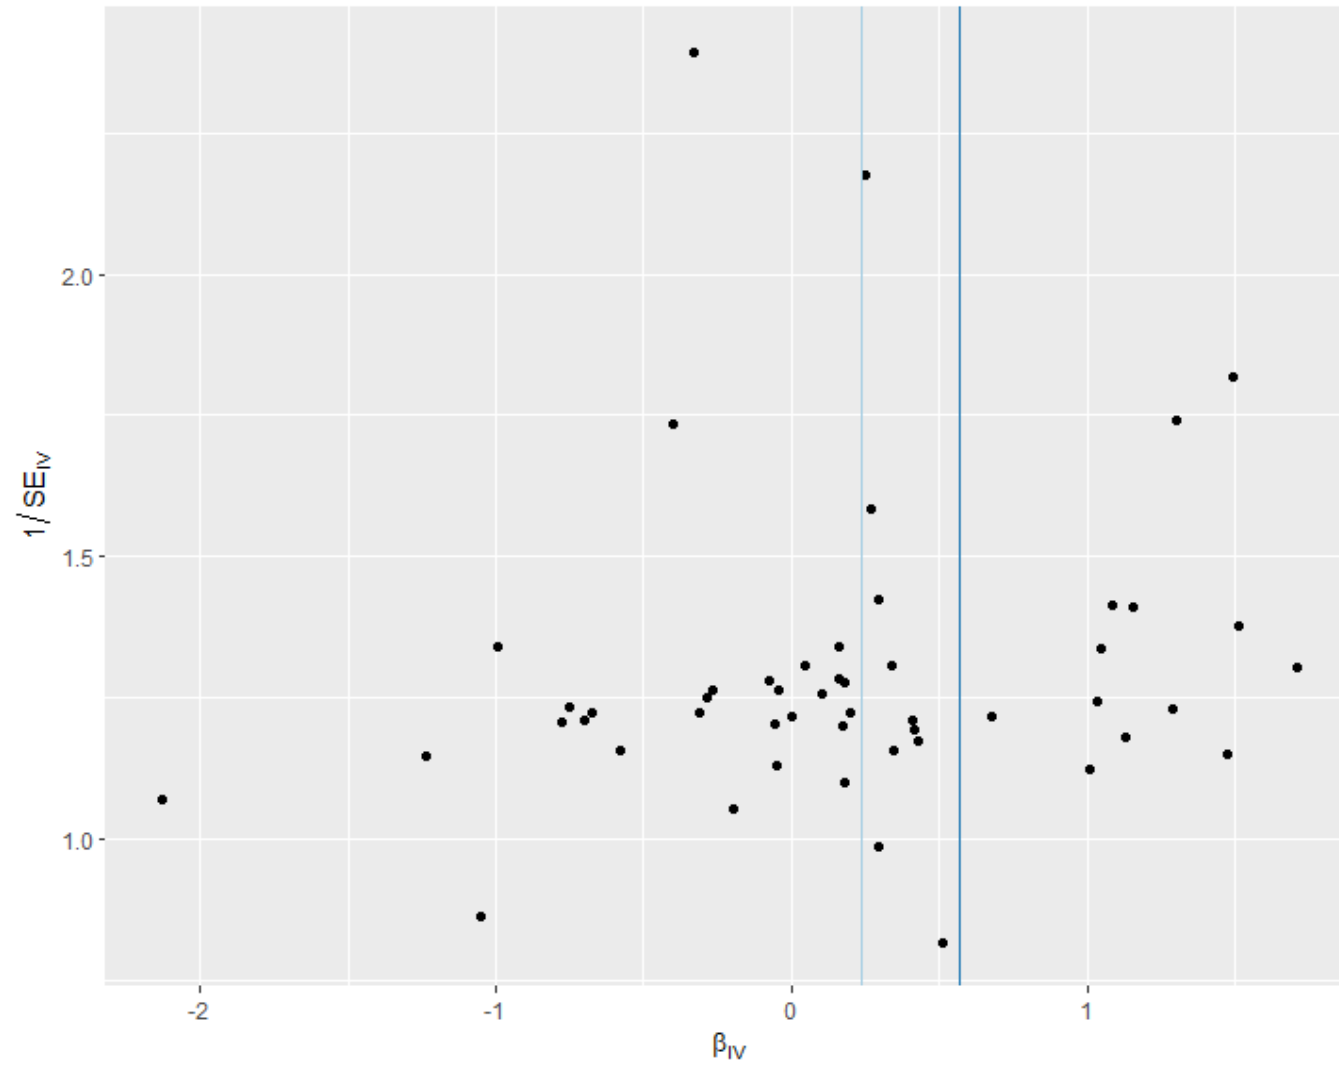

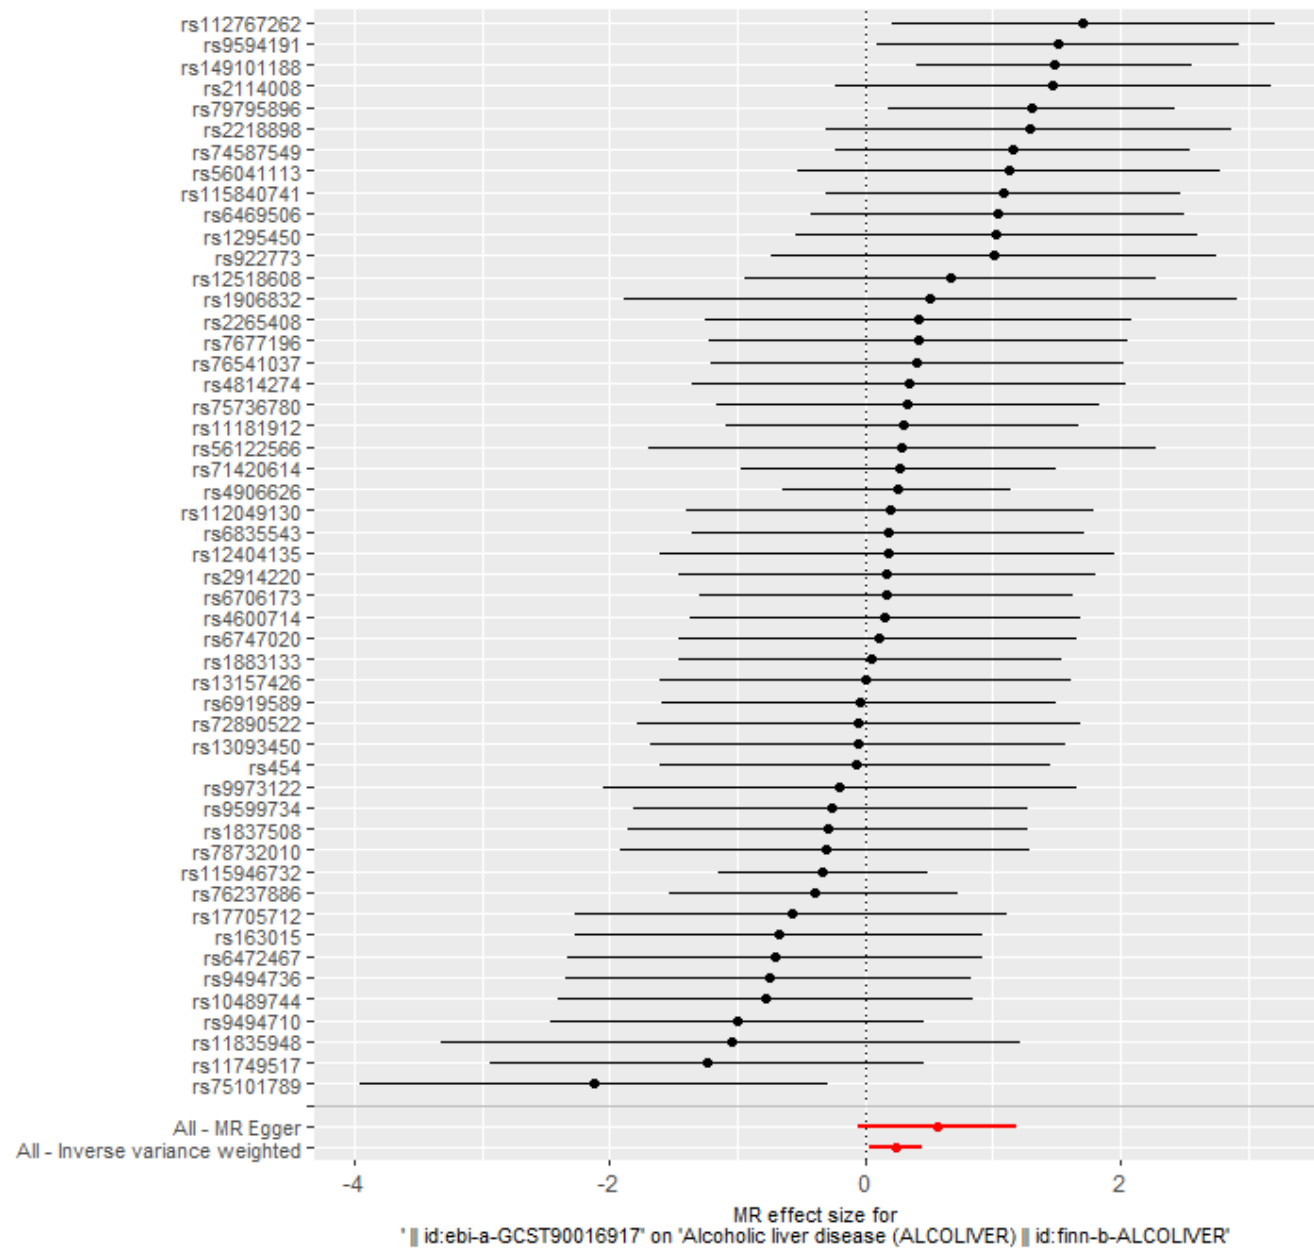

MR Test

- Inverse variance weighted
- MR Egger
- Simple mode
- Weighted median
- Weighted mode

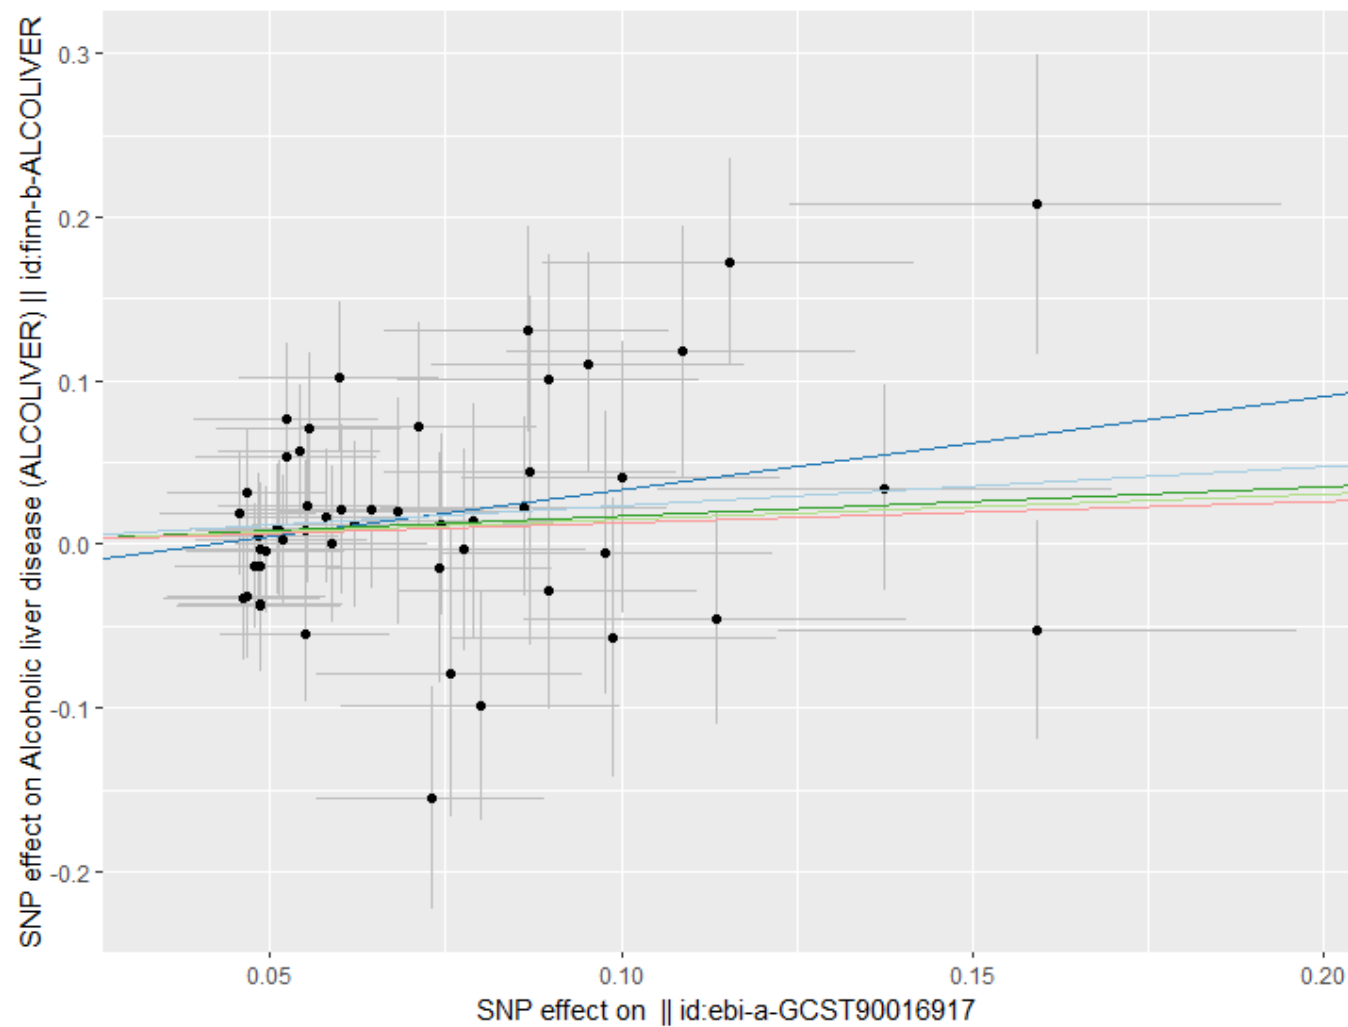



**Figure 163** Leave-one-out analysis, funnel plot, MR effect size and scatter plot for gut microbiota abundance (family Victivallaceae id.2255) on alcoholic liver disease

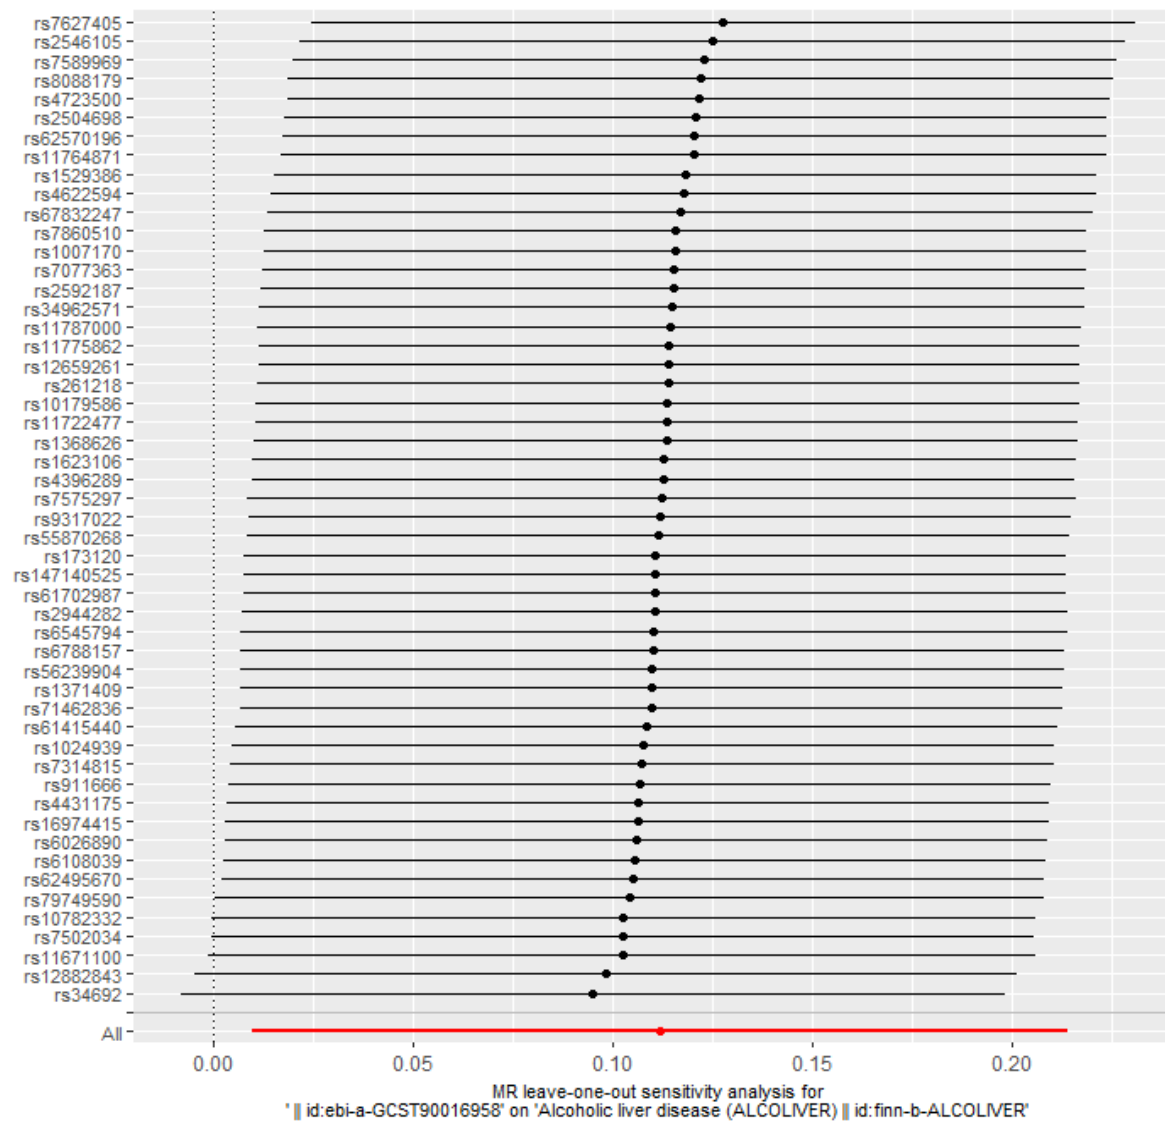

MR Method

- Inverse variance weighted
- MR Egger

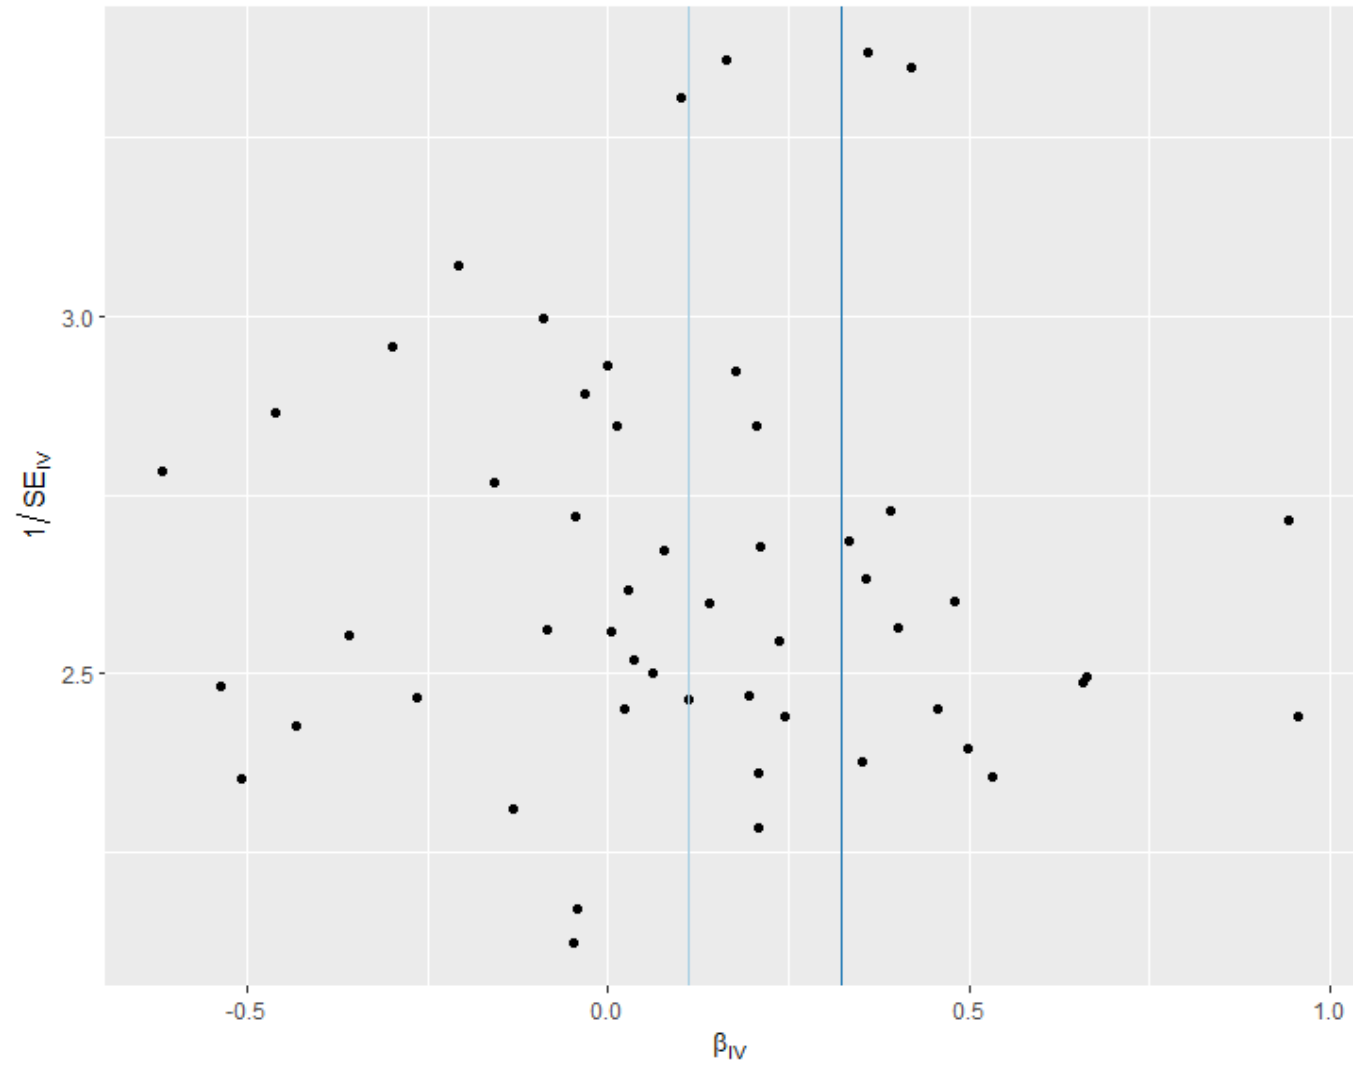

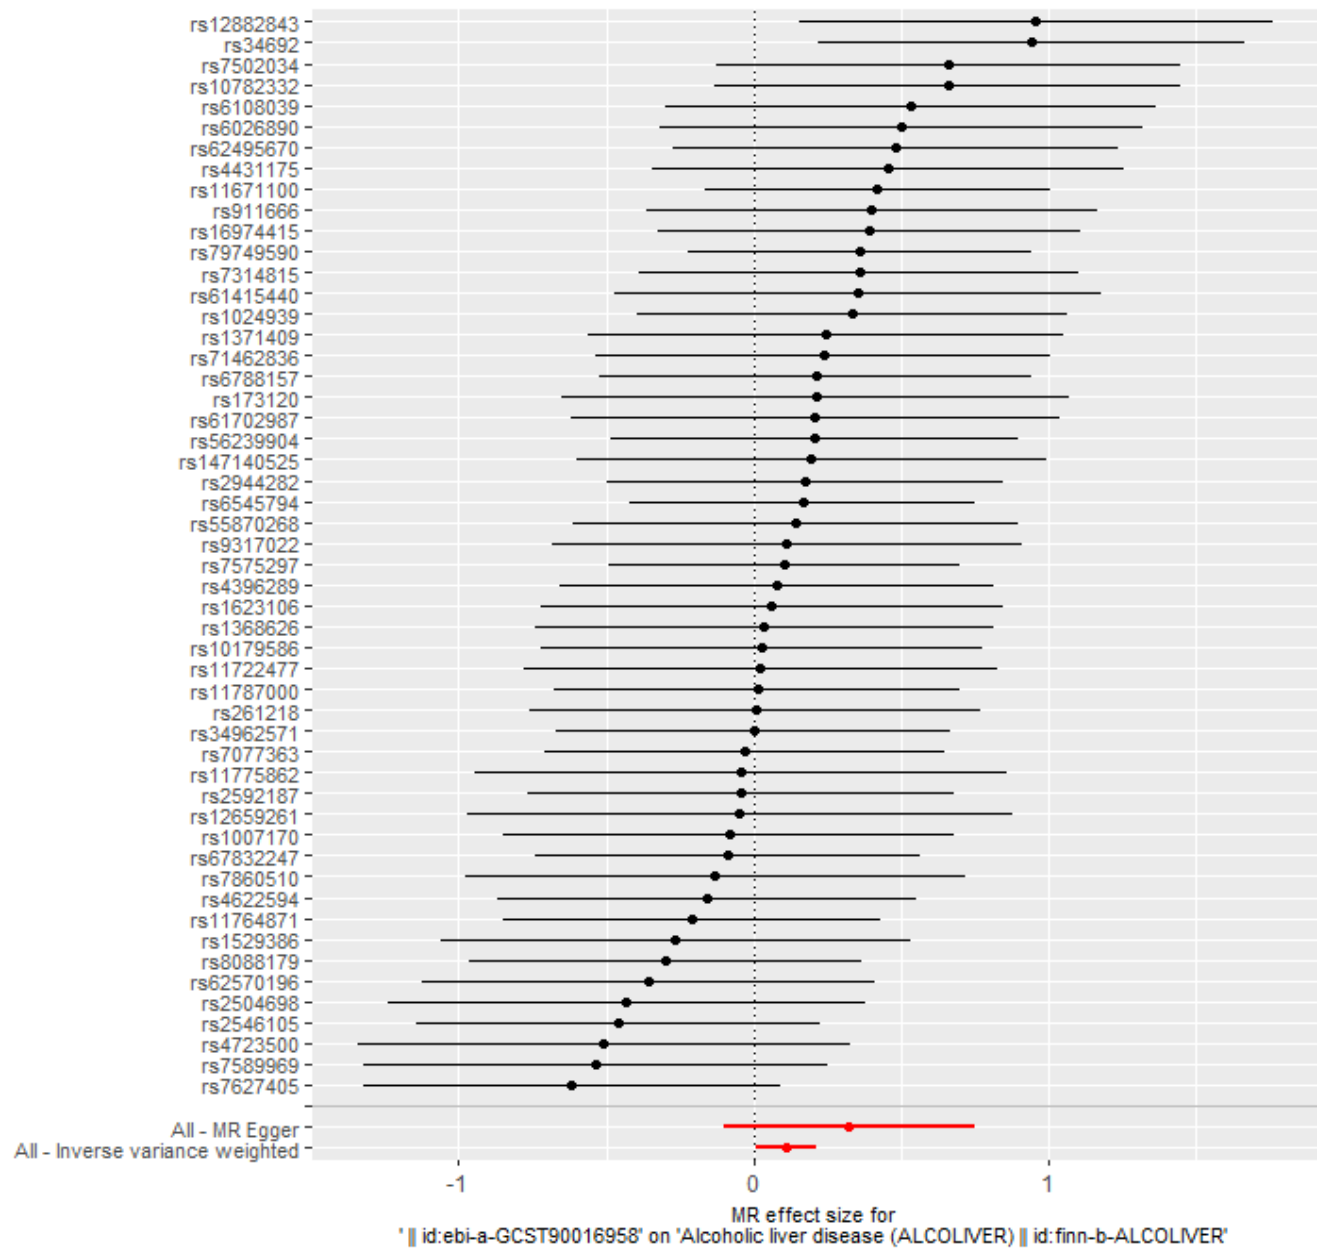

MR Test

- Inverse variance weighted
- MR Egger
- Simple mode
- Weighted median
- Weighted mode

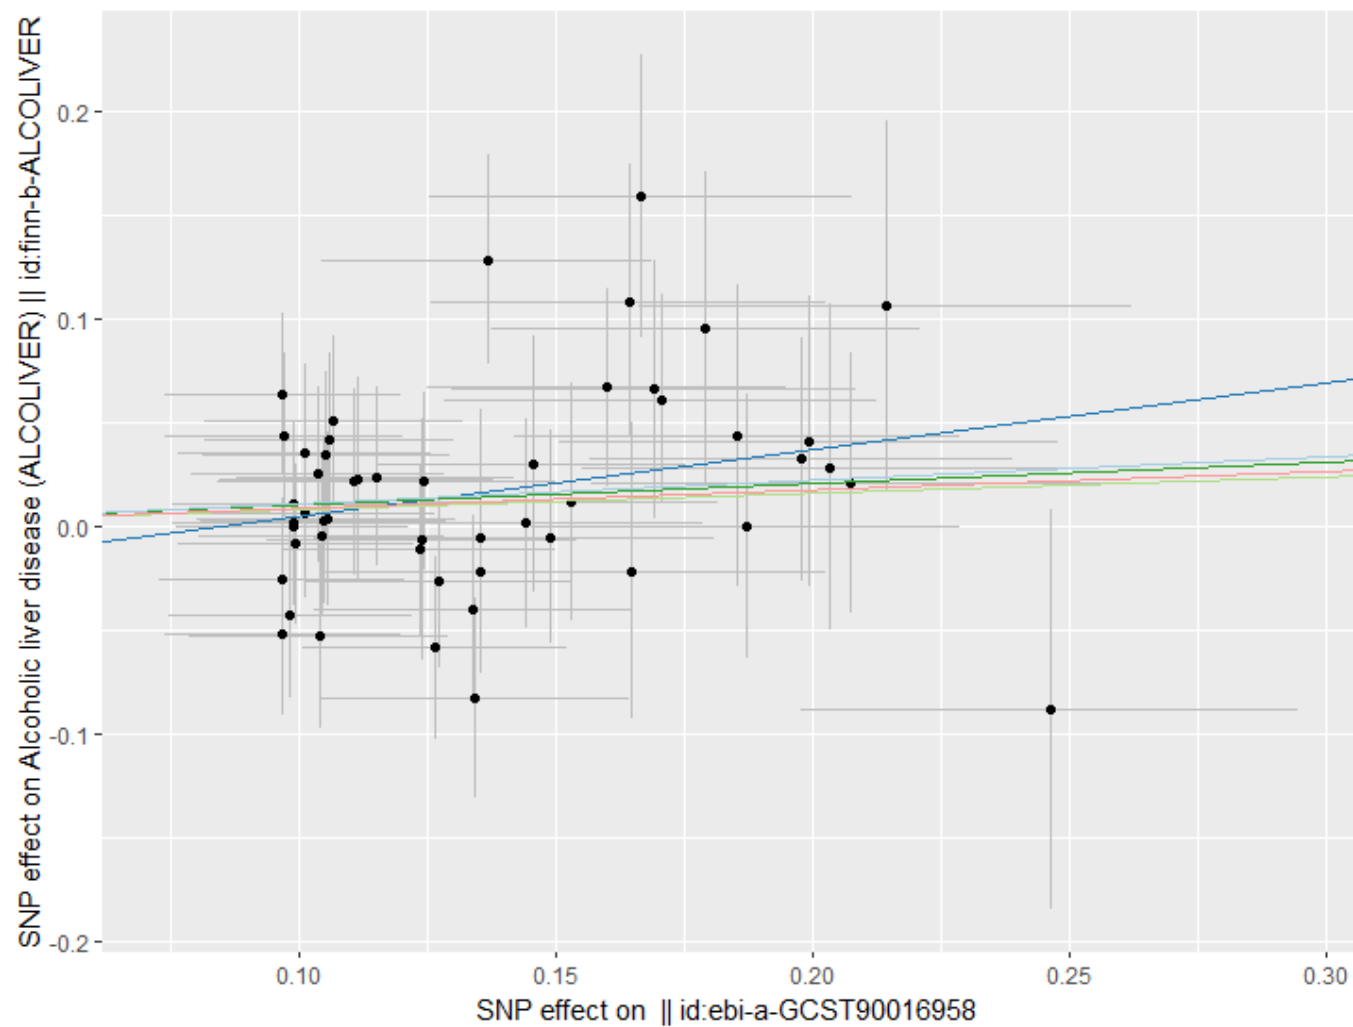

**Figure 164** Leave-one-out analysis, funnel plot, MR effect size and scatter plot for gut microbiota abundance (genus Coprobacter id.949) on alcoholic liver disease

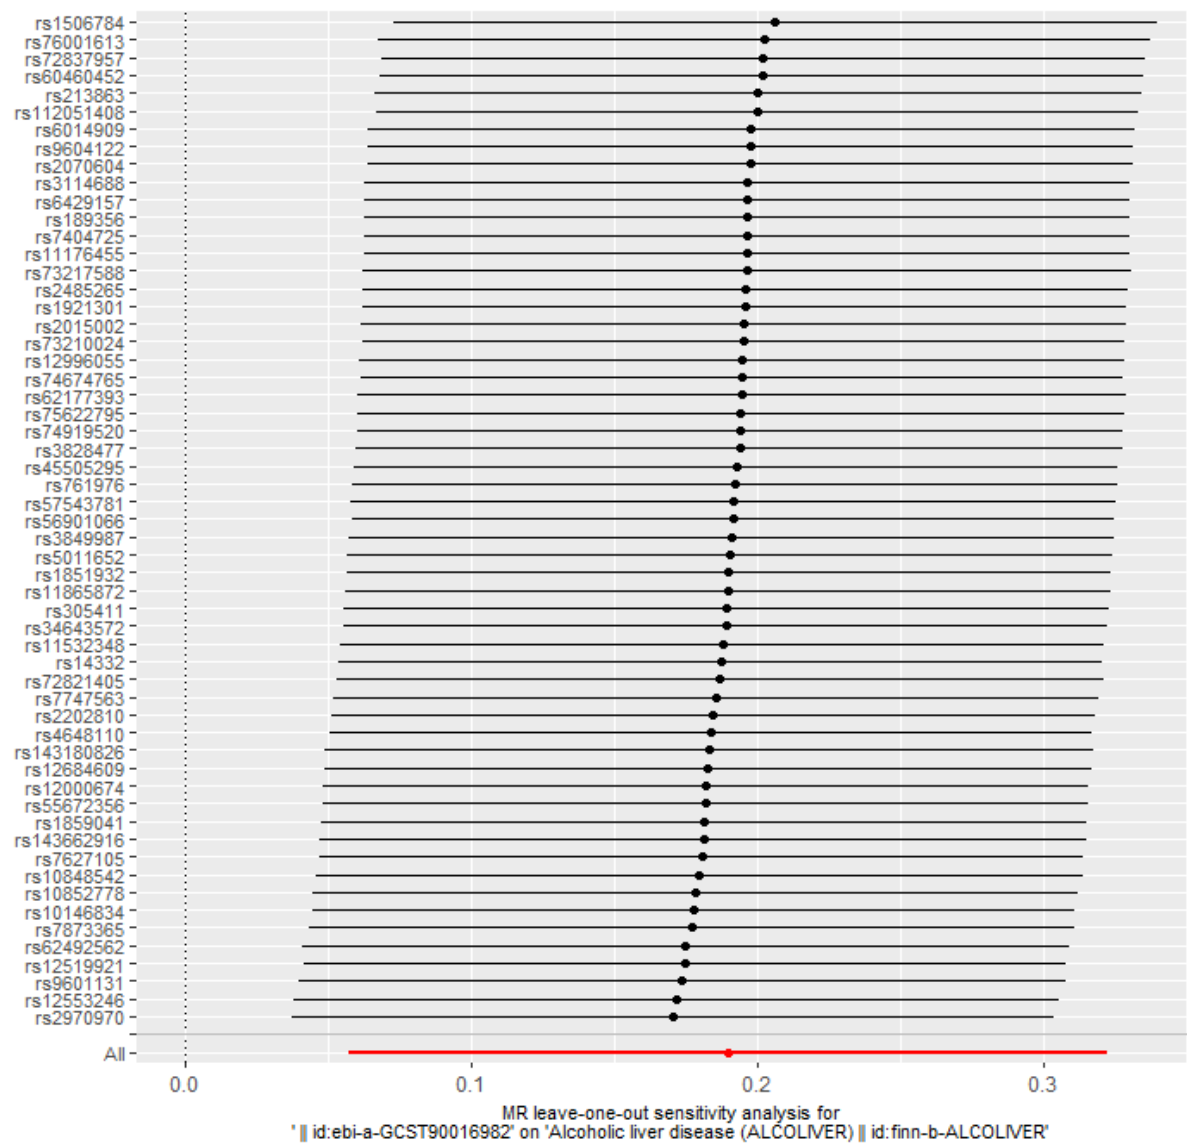

MR Method

- Inverse variance weighted
- MR Egger

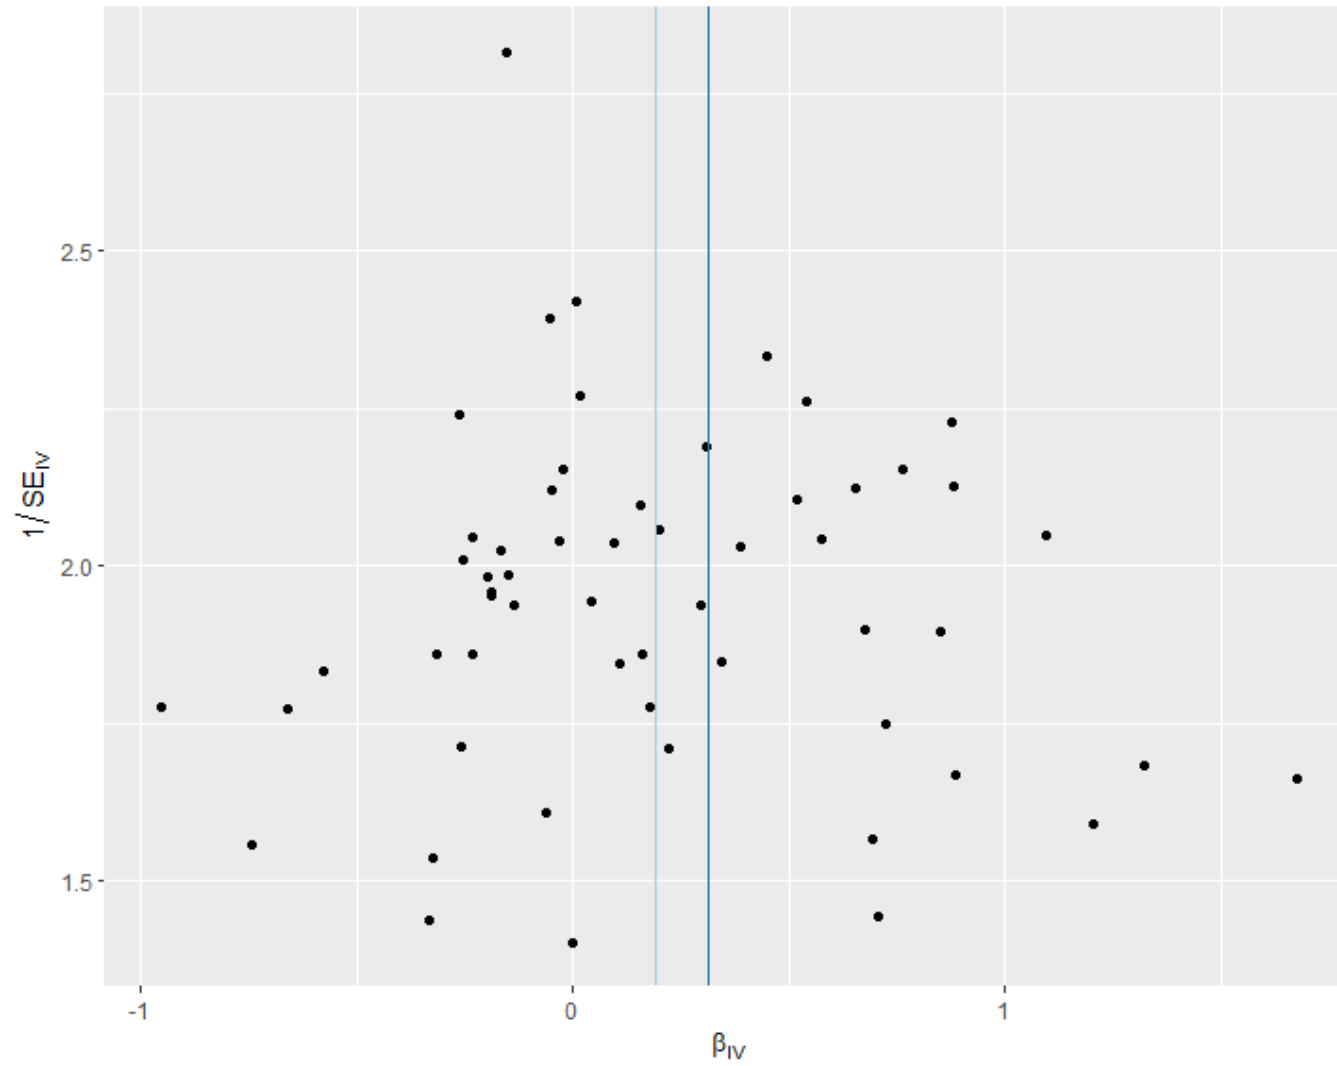

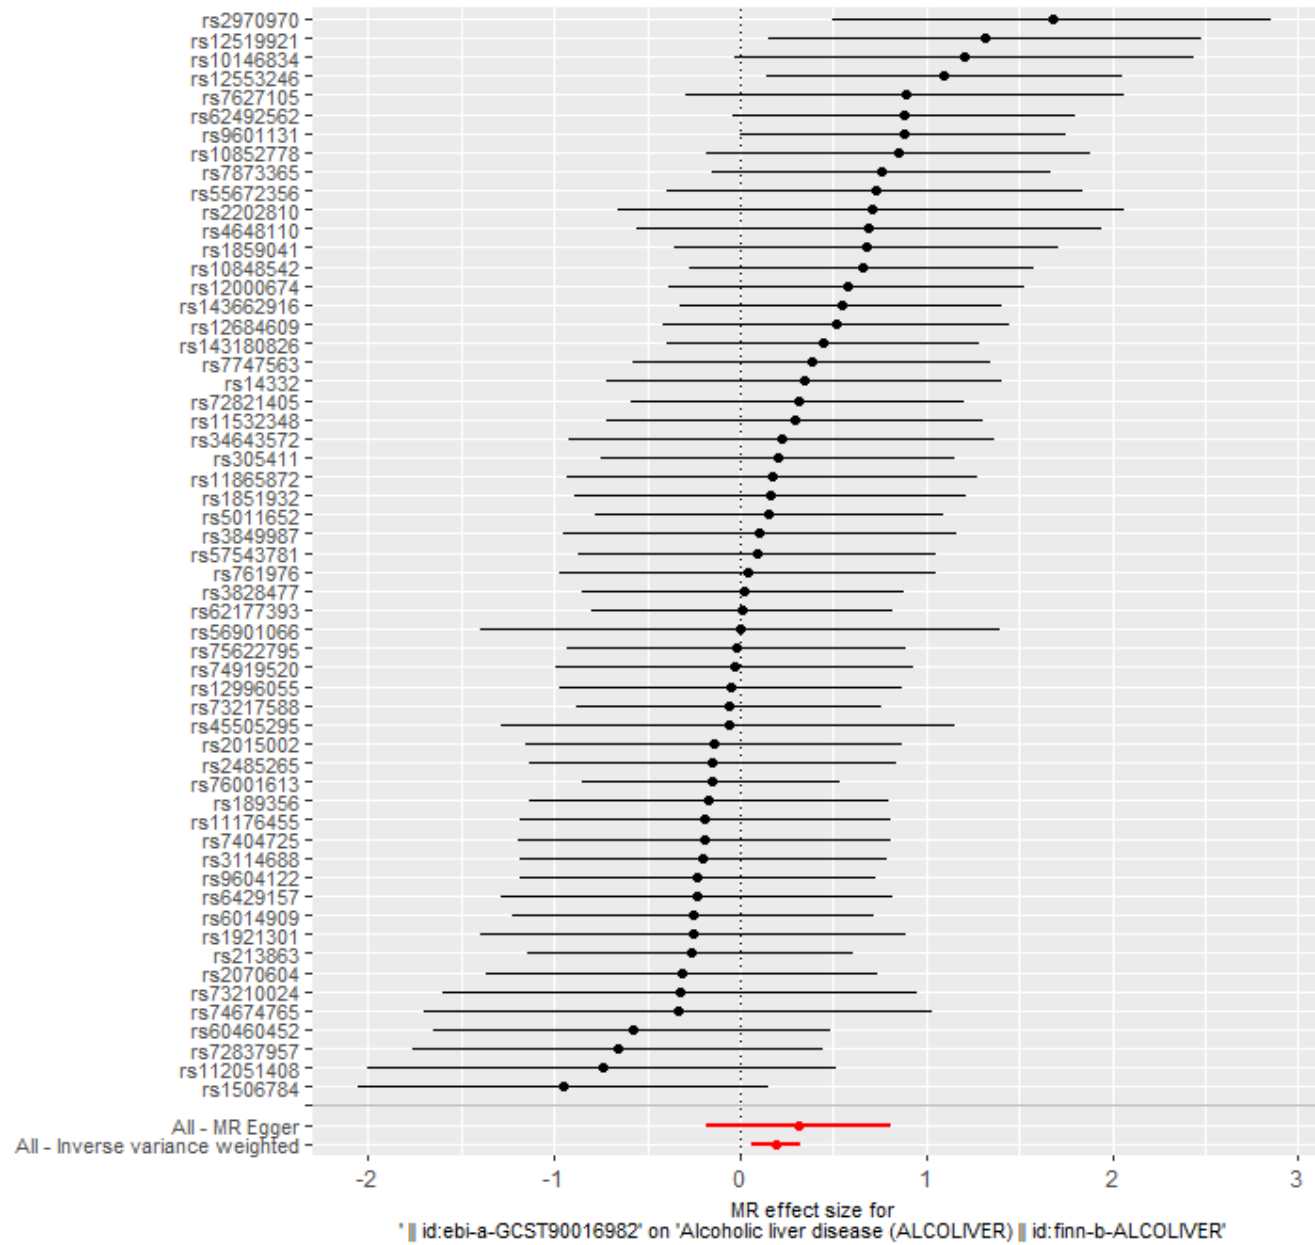

MR Test

- Inverse variance weighted
- MR Egger
- Simple mode
- Weighted median
- Weighted mode

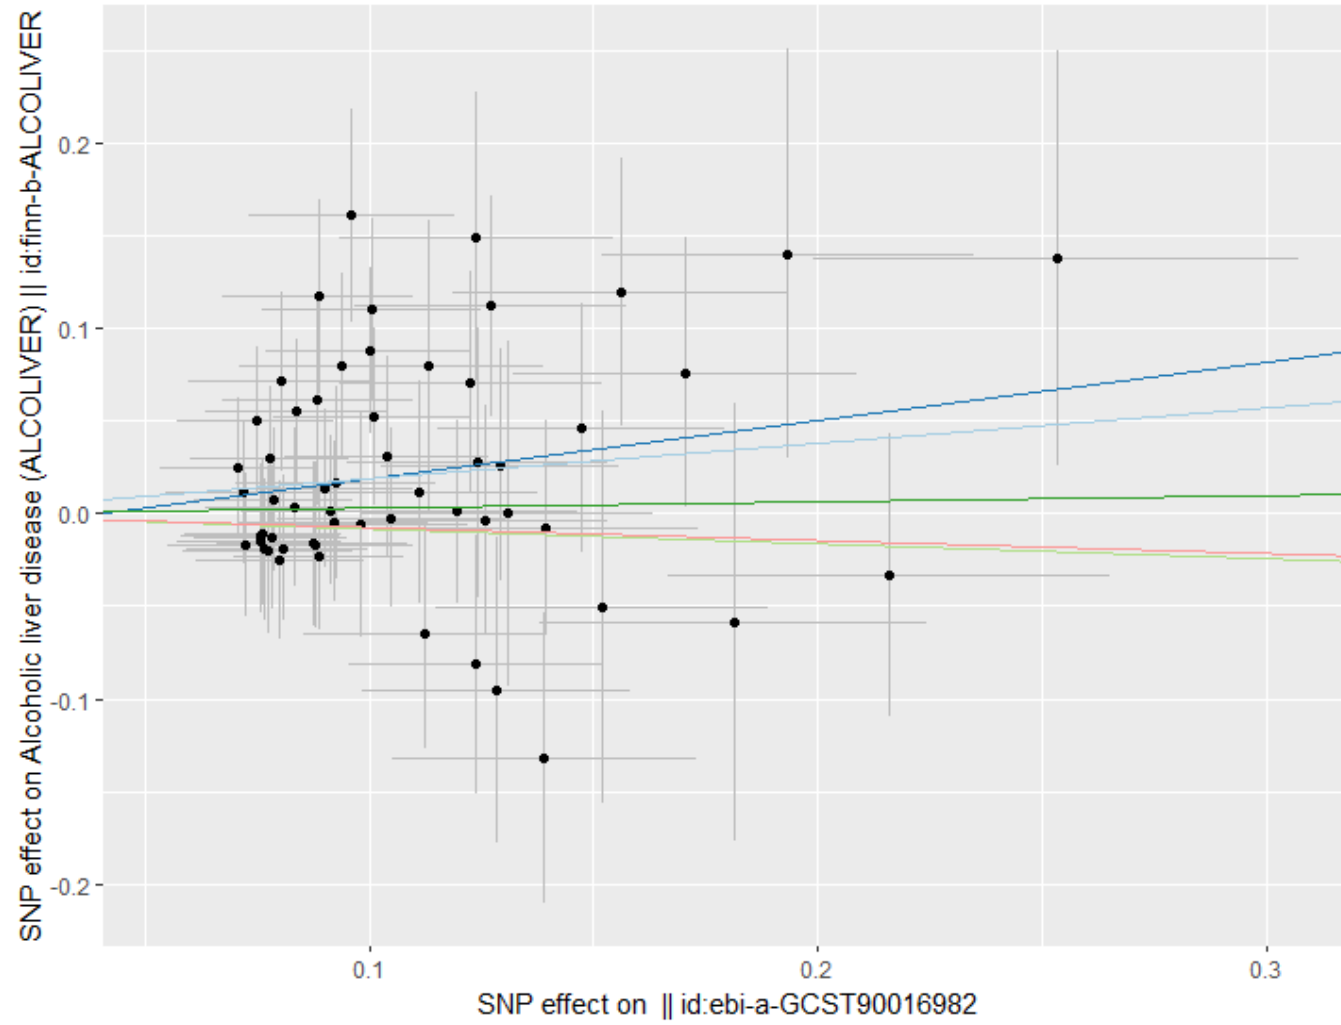



**Figure 165** Leave-one-out analysis, funnel plot, MR effect size and scatter plot for gut microbiota abundance (genus Family XIII UCG001 id.11294) on alcoholic liver disease

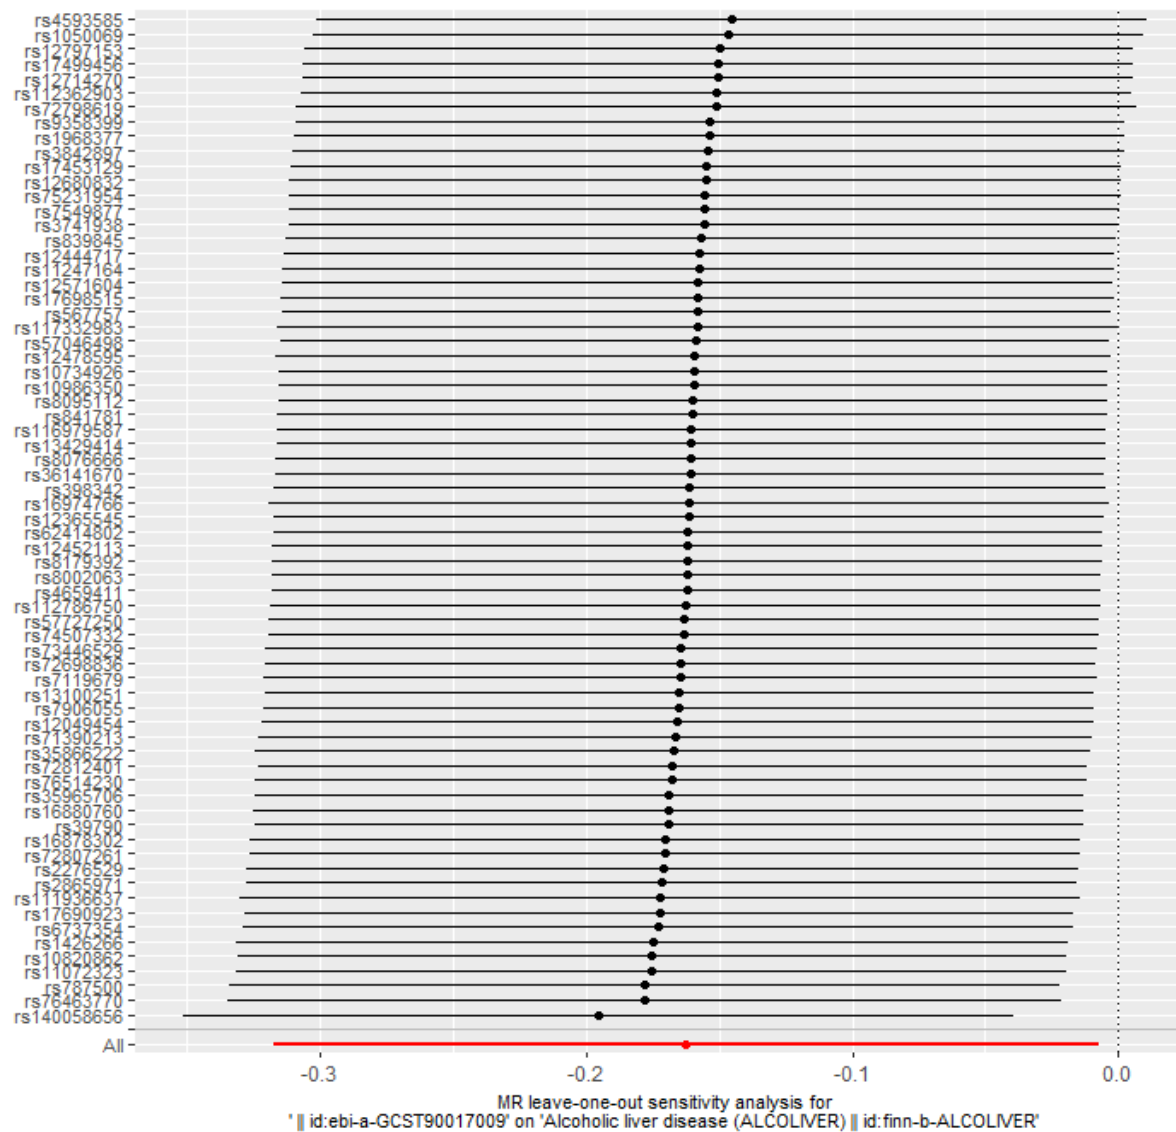

MR Method

- Inverse variance weighted
- MR Egger

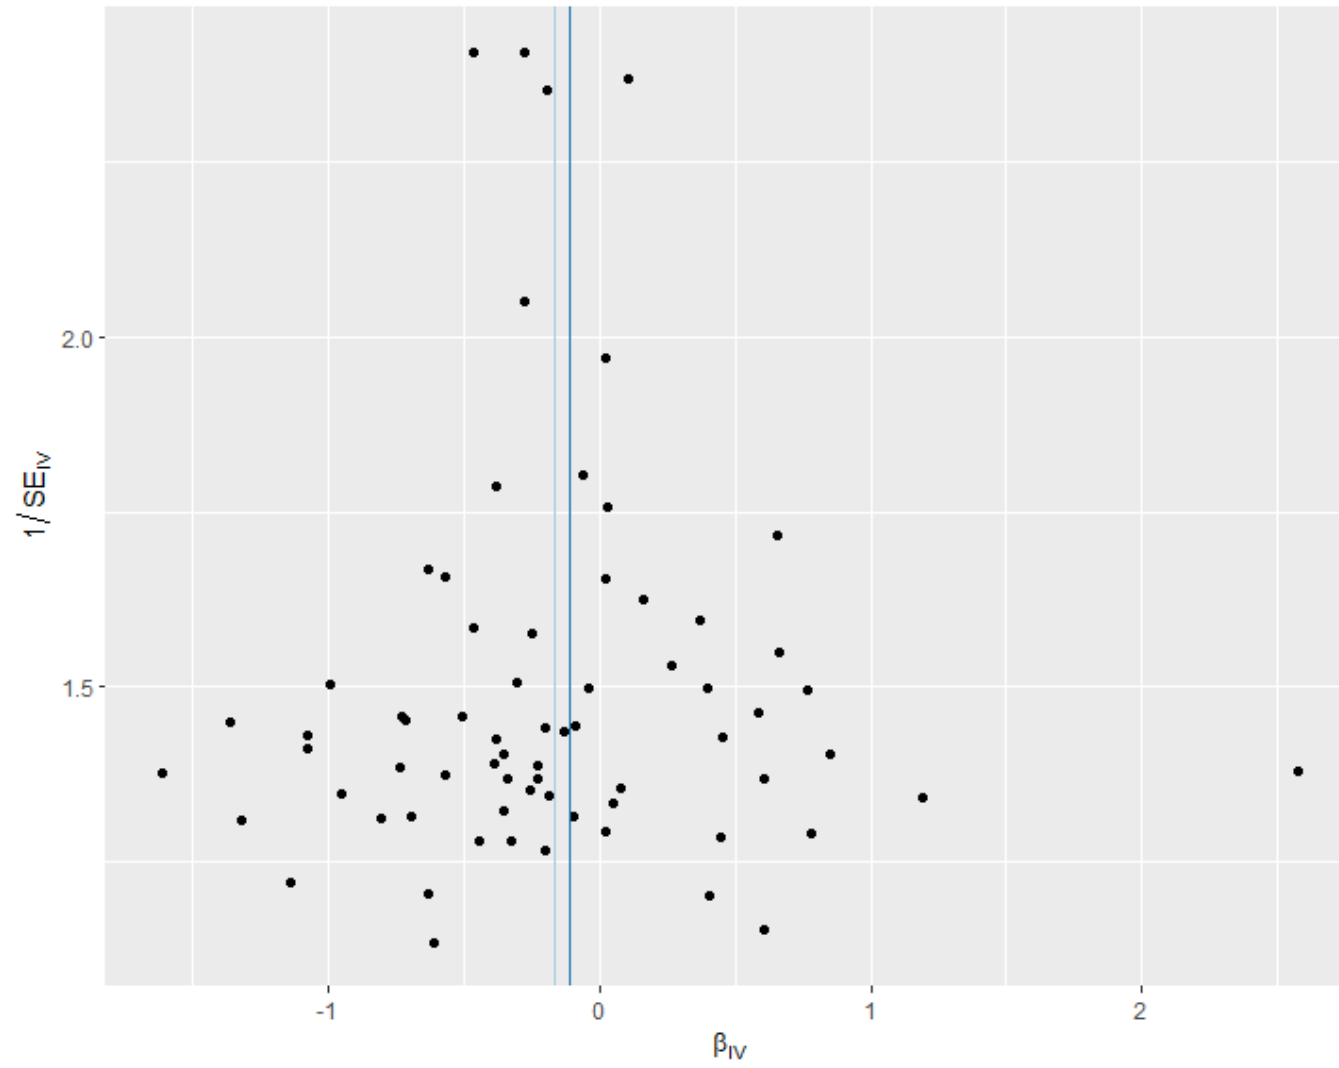

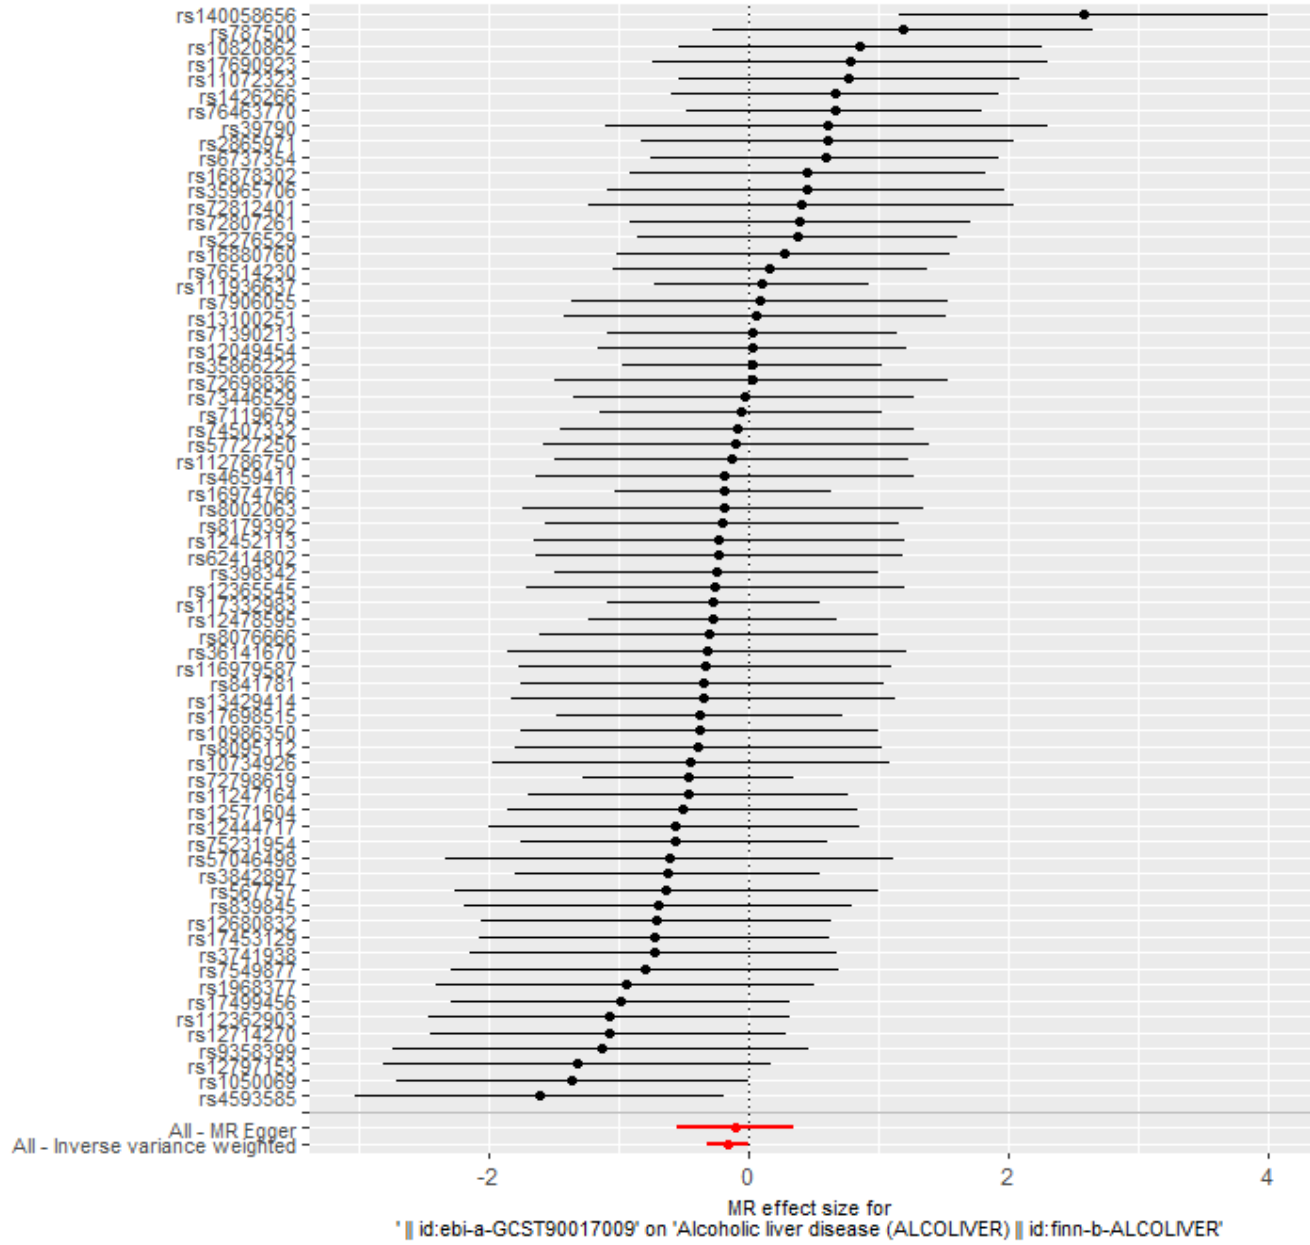

MR Test

- Inverse variance weighted
- MR Egger
- Simple mode
- Weighted median
- Weighted mode

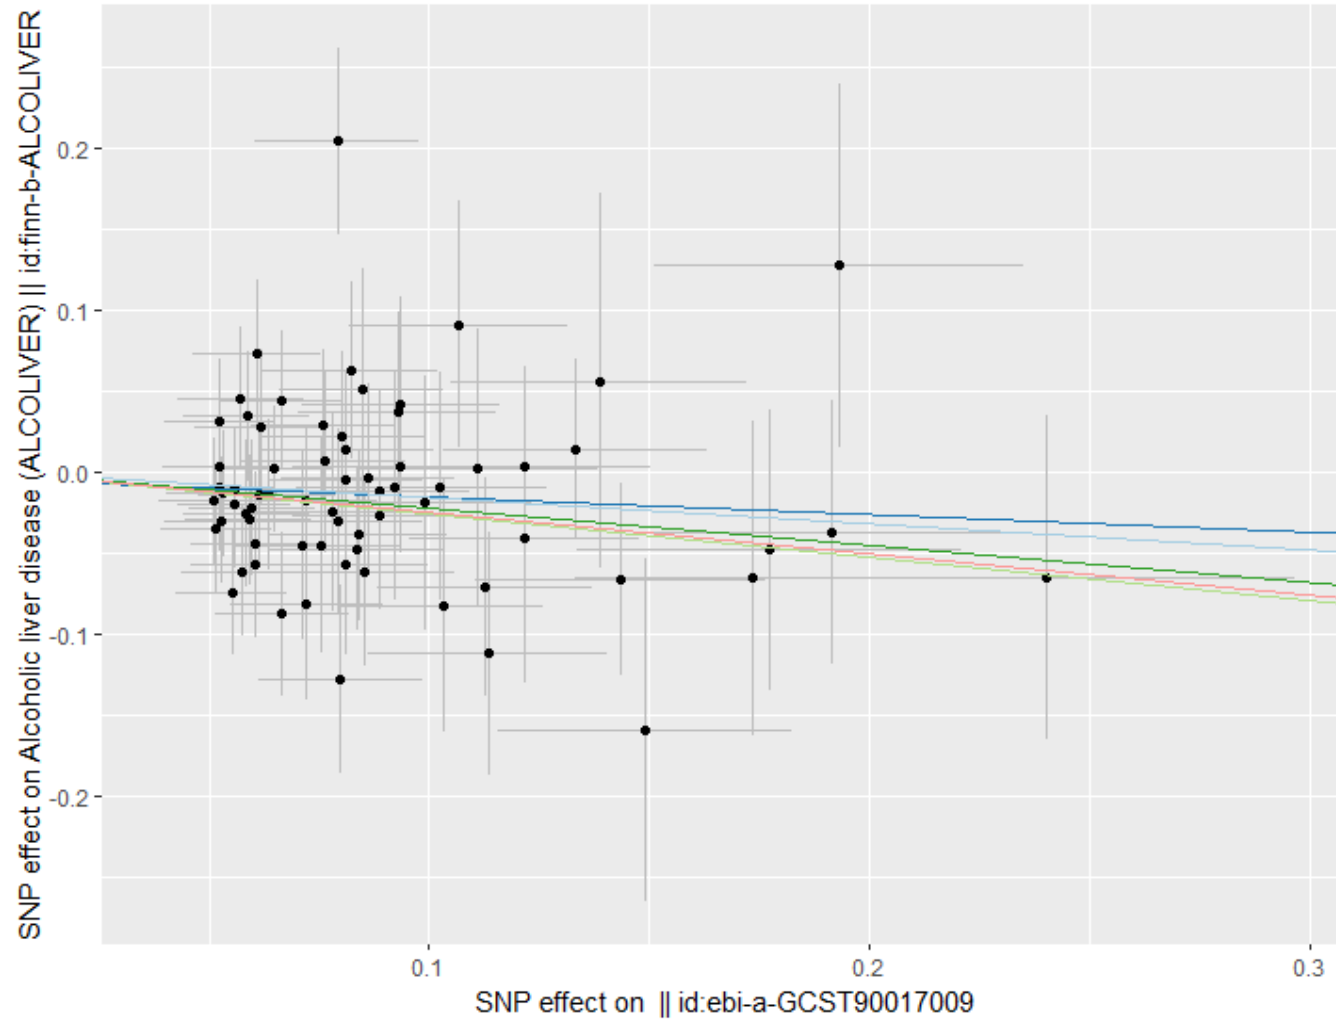

**Figure 166** Leave-one-out analysis, funnel plot, MR effect size and scatter plot for gut microbiota abundance (genus *Lactococcus* id.1851) on alcoholic liver disease

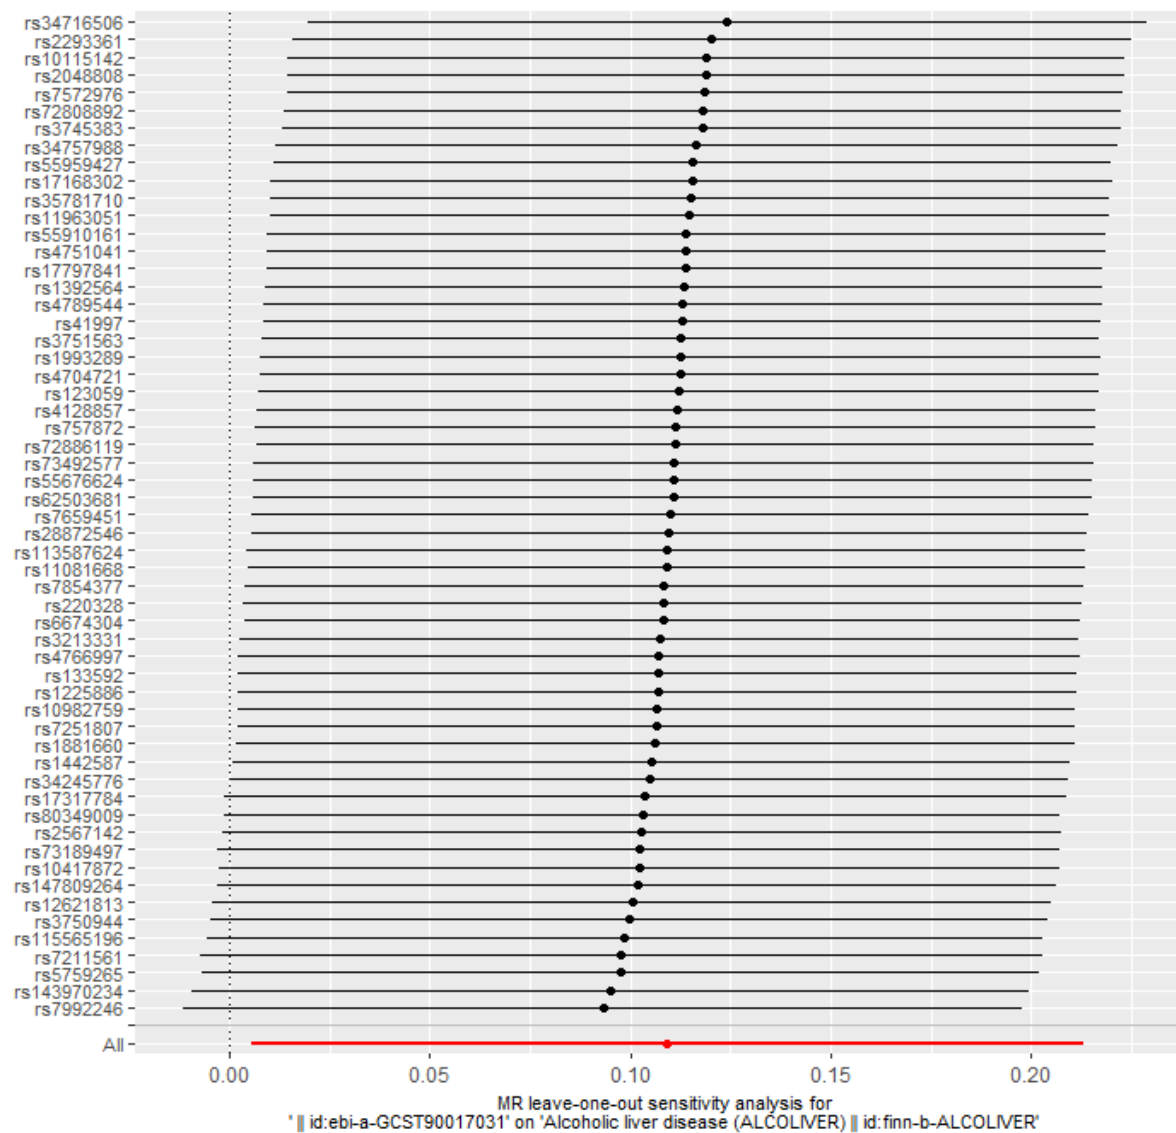

MR Method

- Inverse variance weighted
- MR Egger

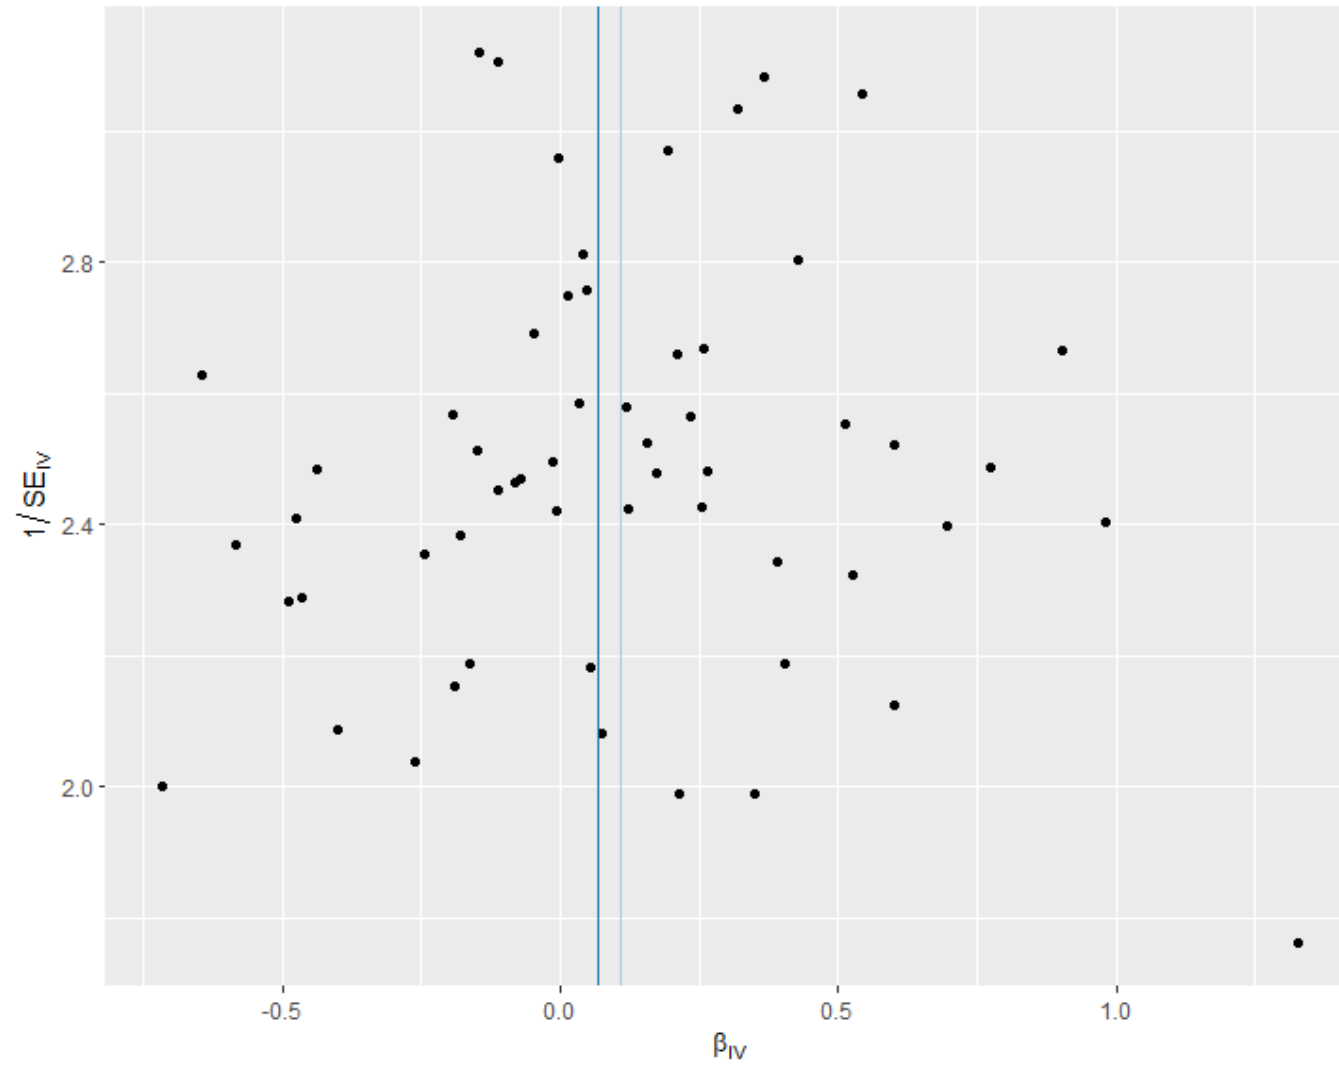

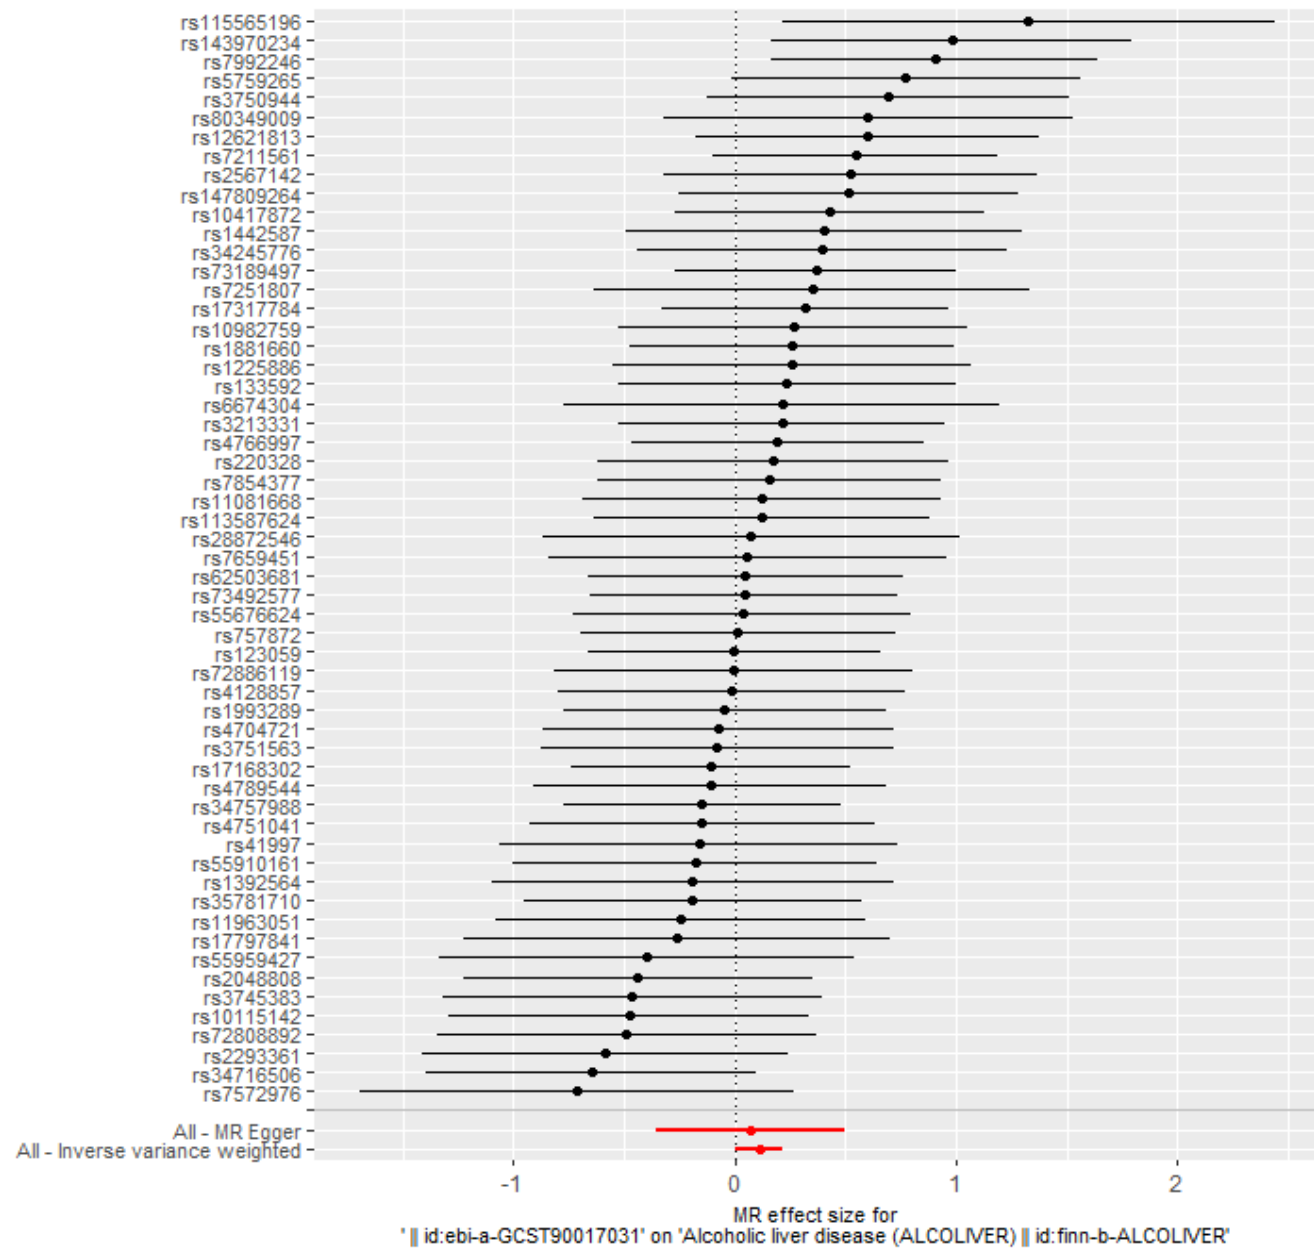

MR Test

- Inverse variance weighted
- MR Egger
- Simple mode
- Weighted median
- Weighted mode

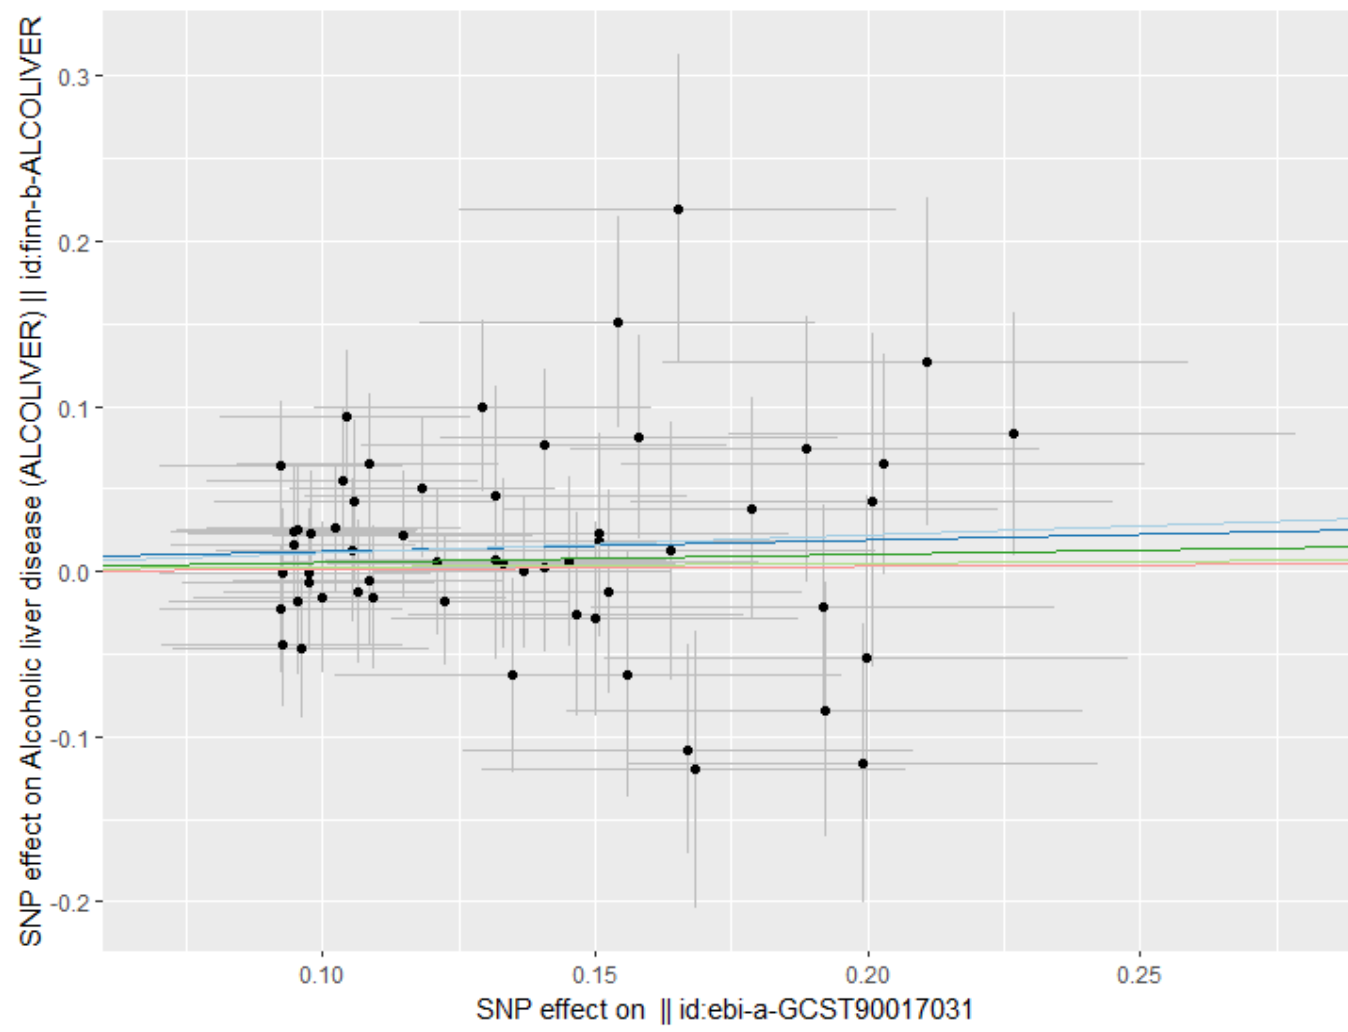



**Figure 167** Leave-one-out analysis, funnel plot, MR effect size and scatter plot for gut microbiota abundance (phylum Actinobacteria id.400) on alcoholic liver disease

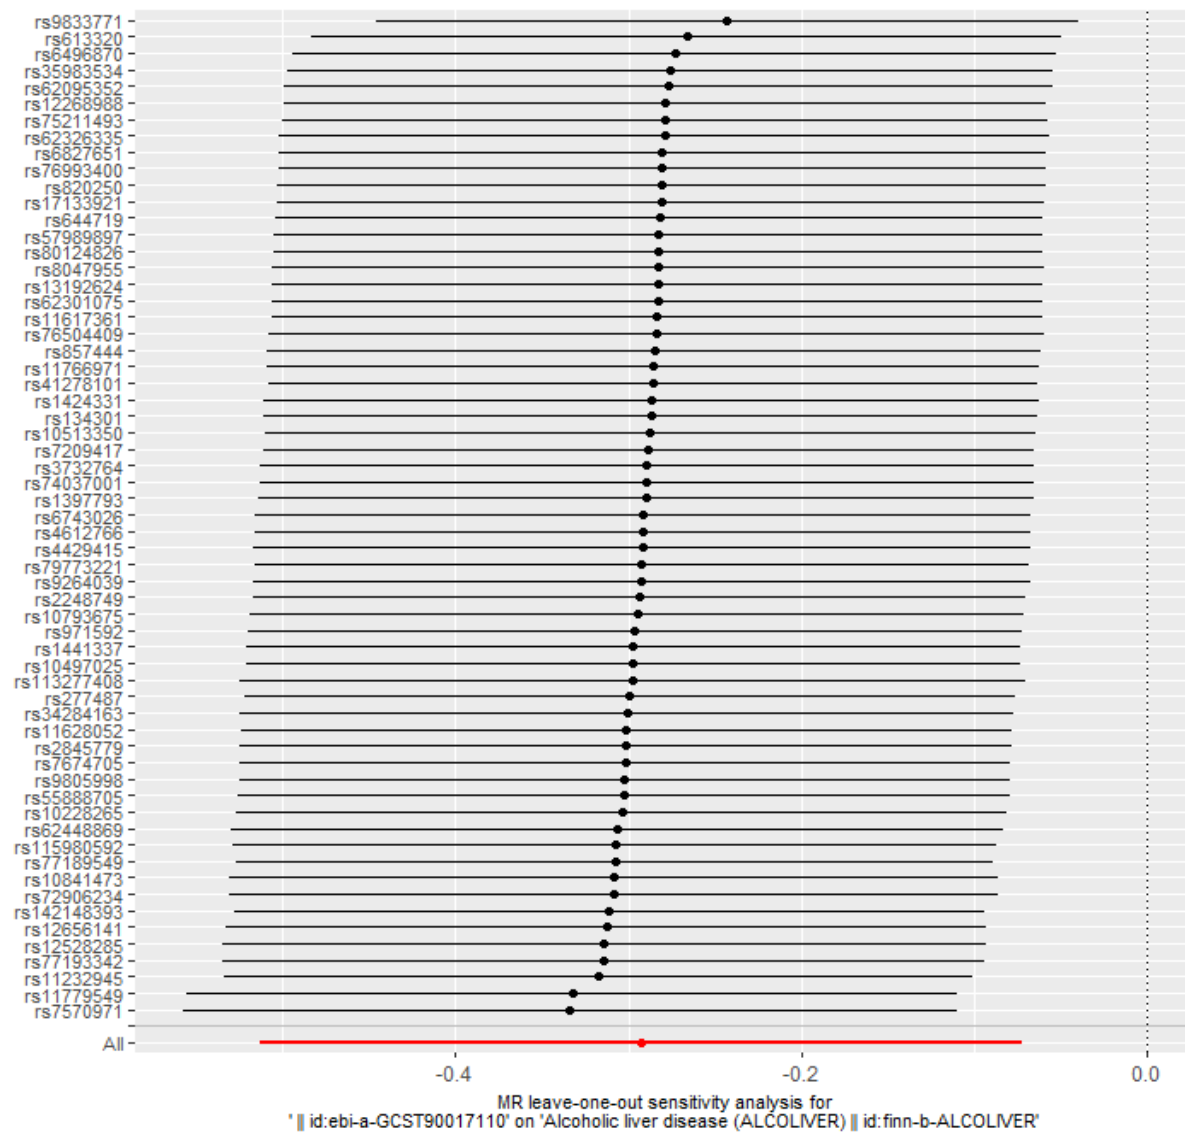

MR Method  
Inverse variance weighted  
MR Egger

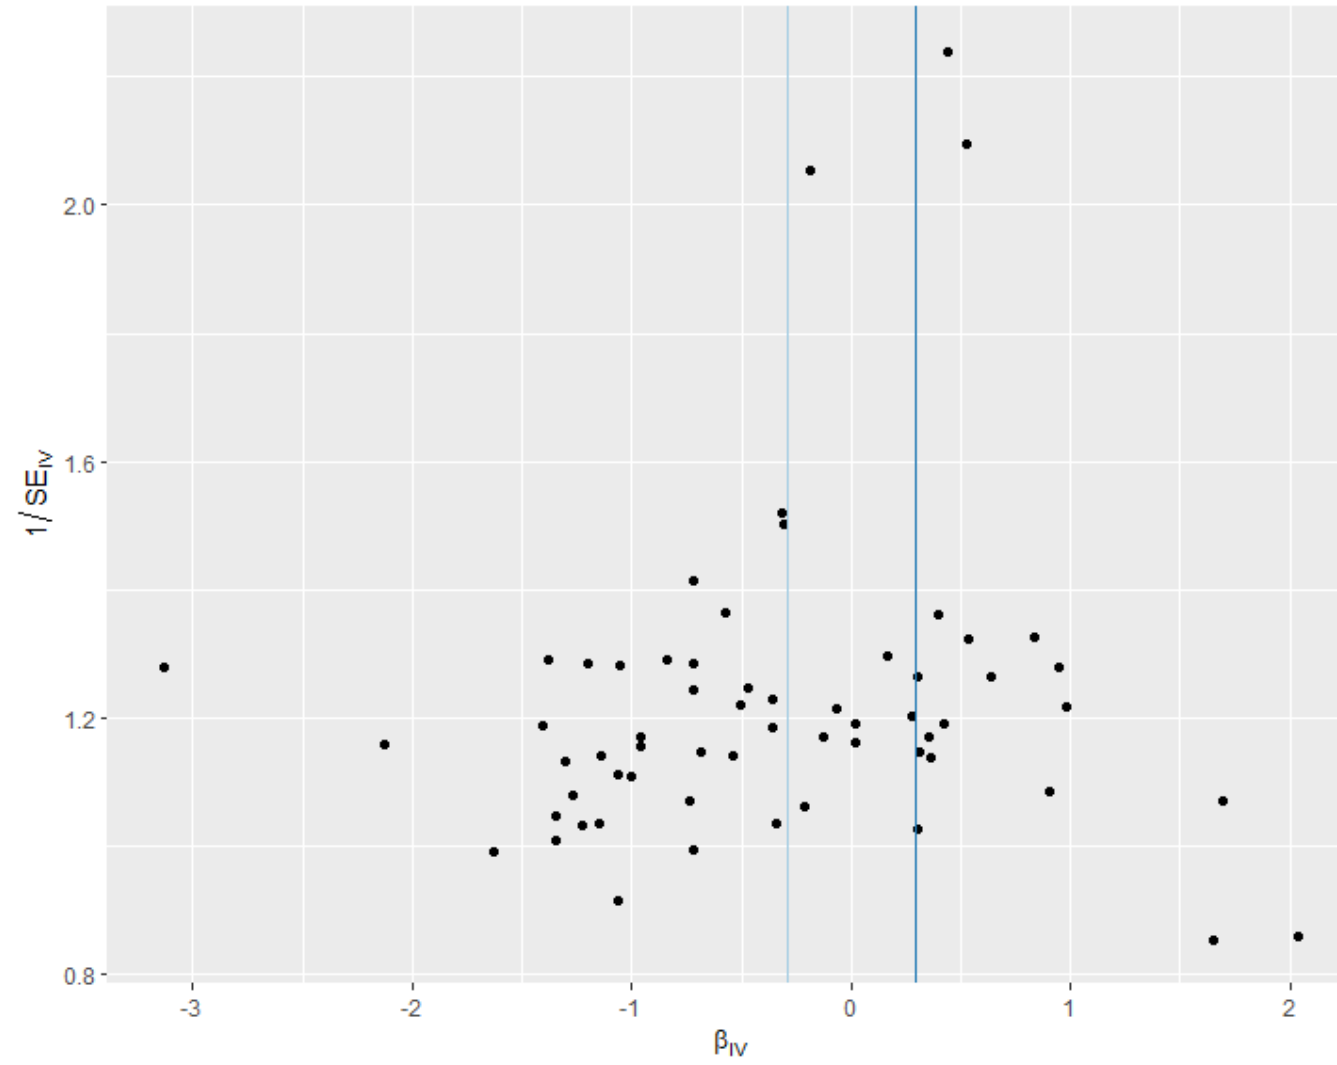

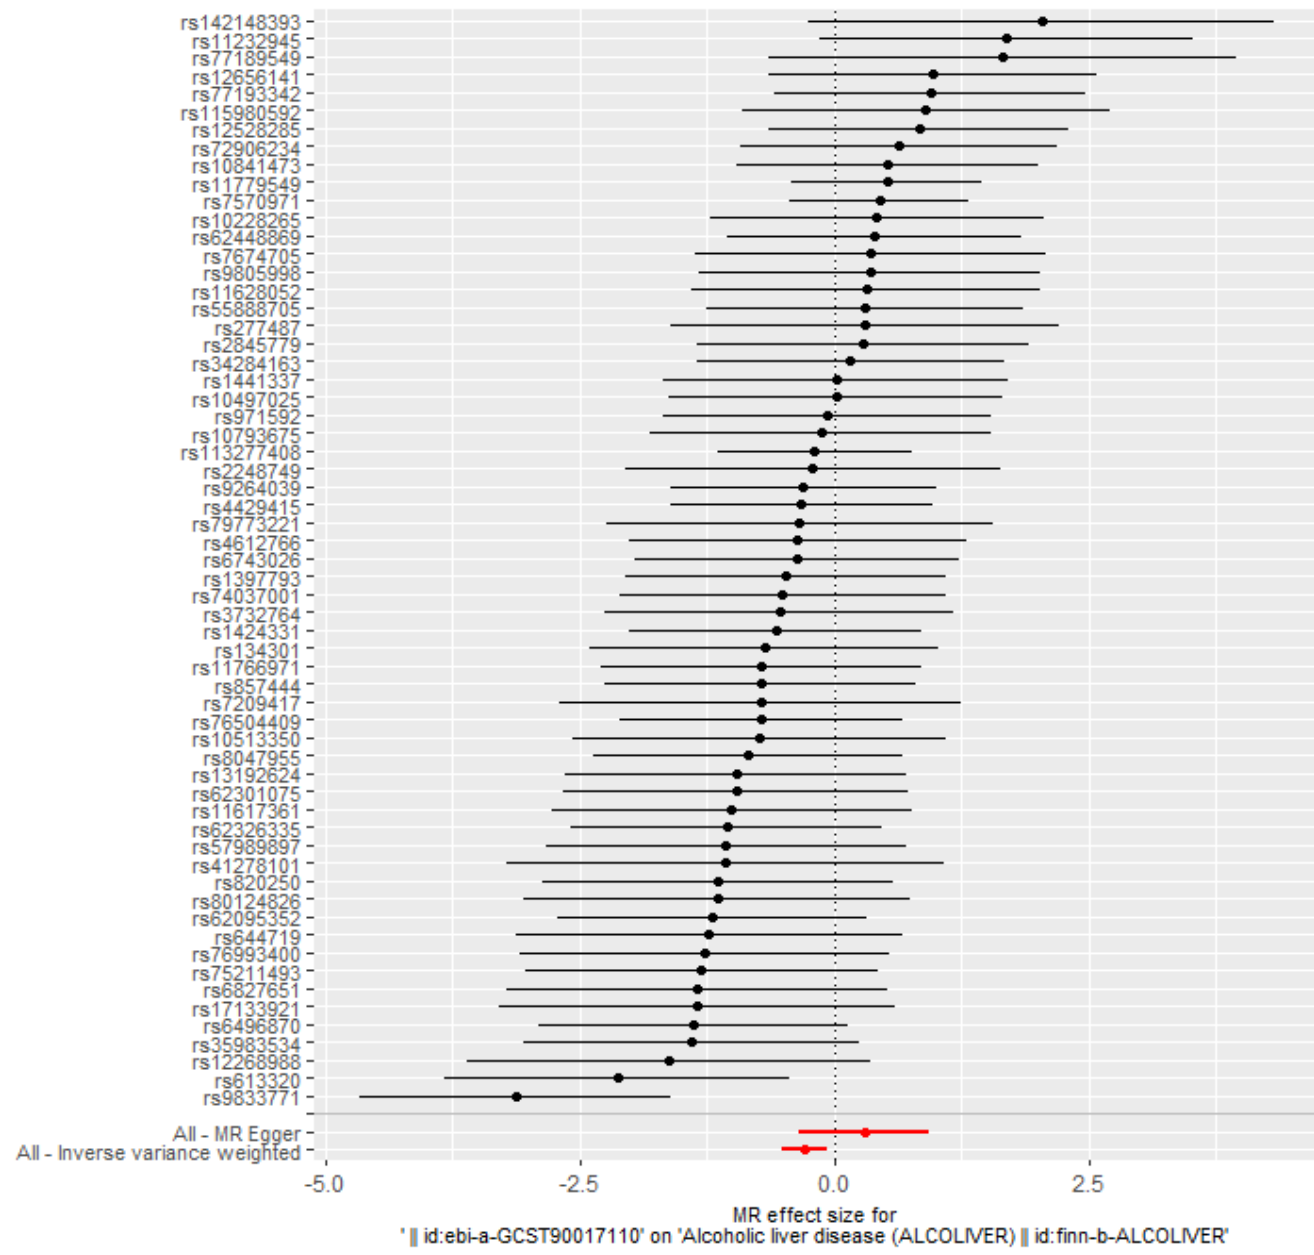

MR Test

- Inverse variance weighted
- MR Egger
- Simple mode
- Weighted median
- Weighted mode

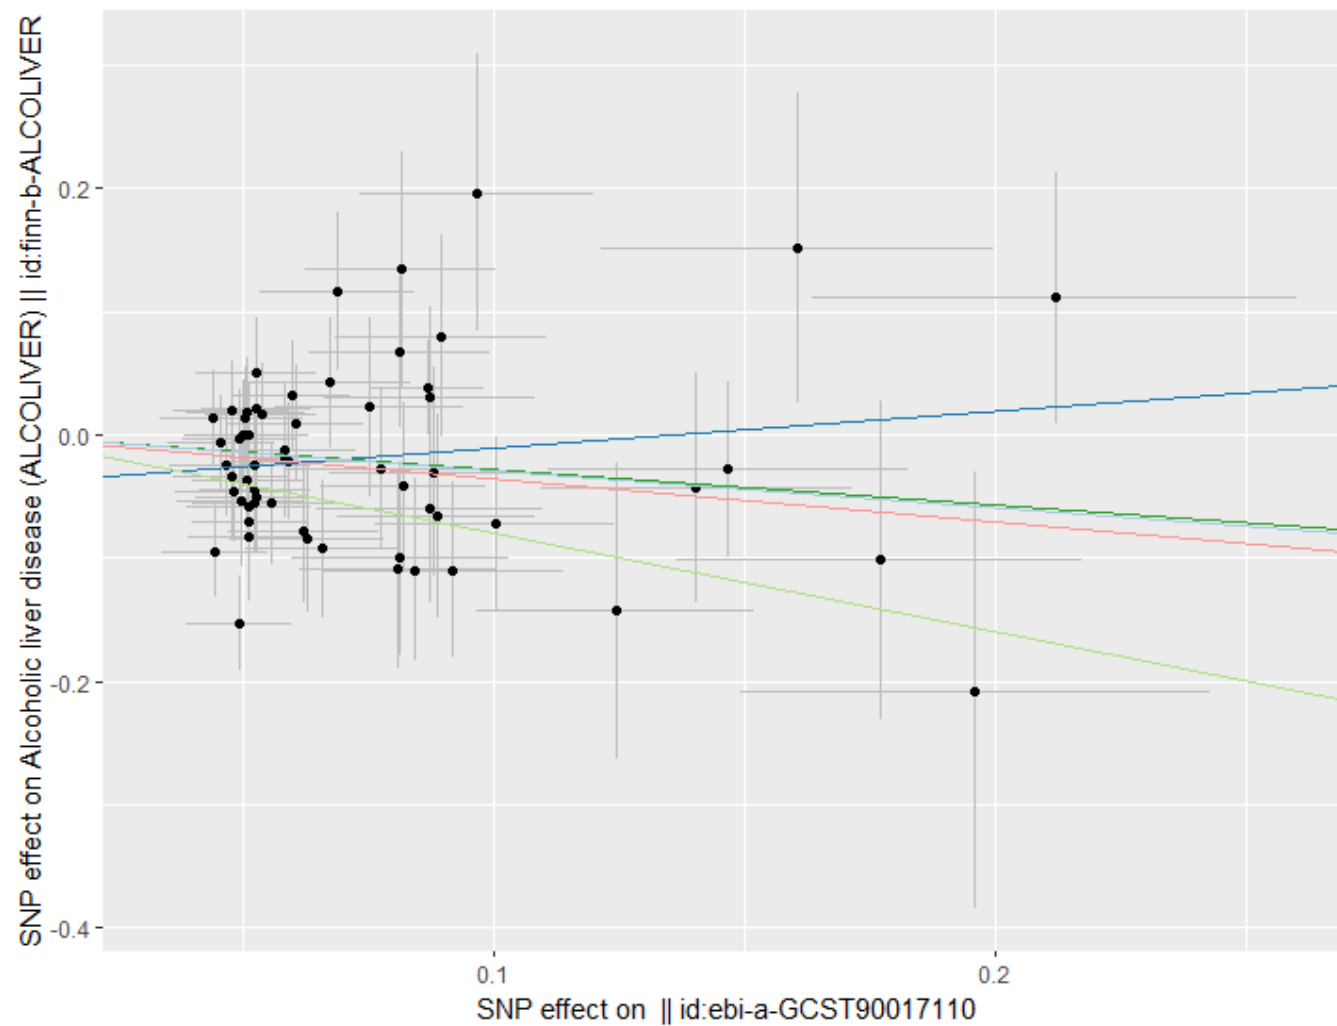

**Figure 168** Leave-one-out analysis, funnel plot, MR effect size and scatter plot for gut microbiota abundance (class Betaproteobacteria id.2867) on alcoholic liver disease

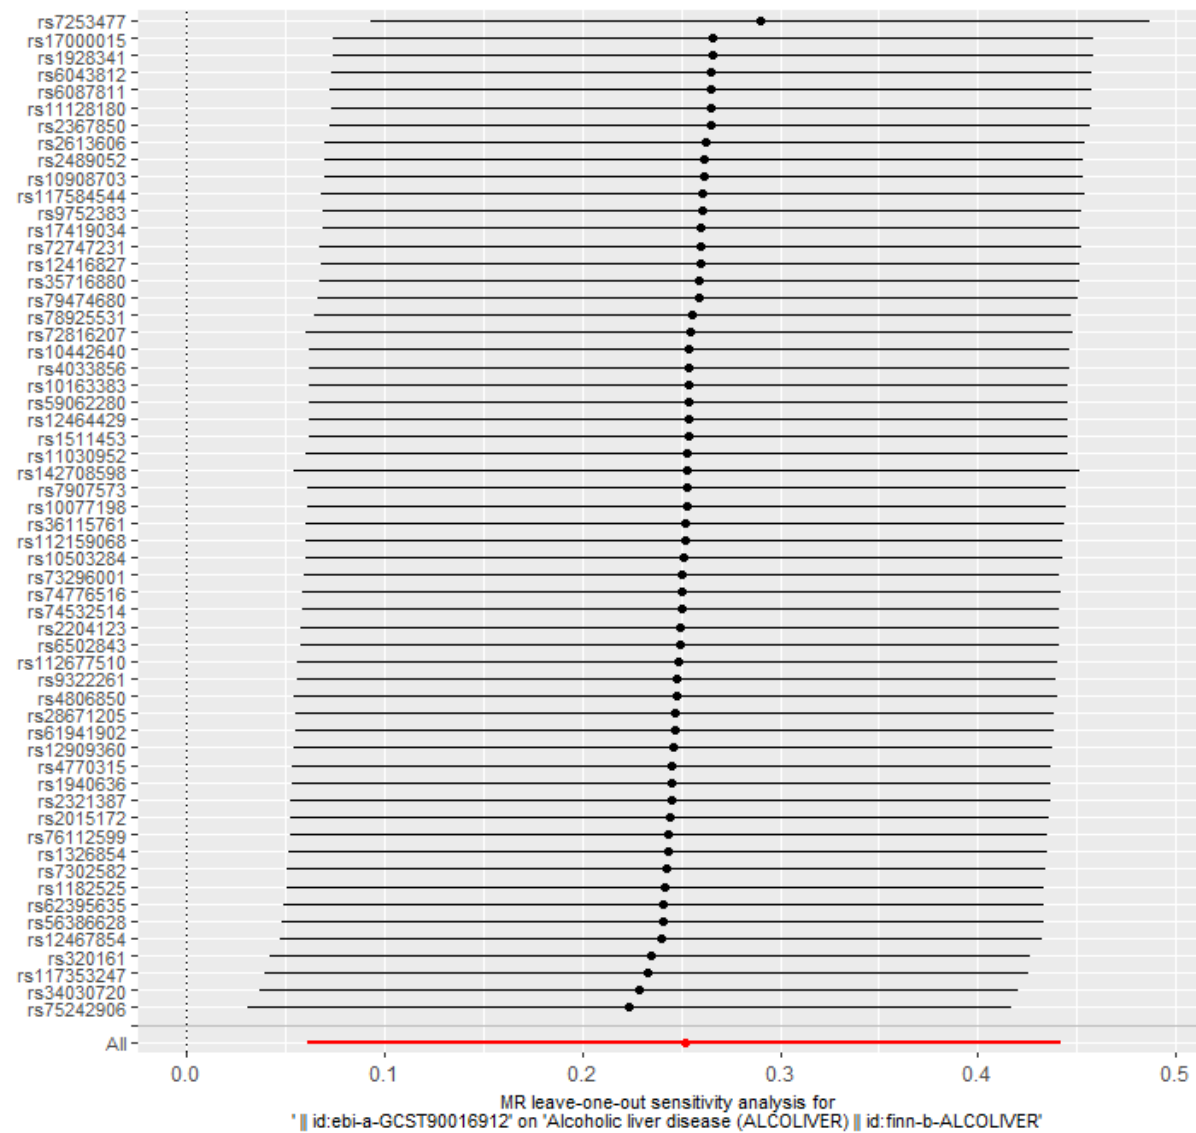

MR Method

- Inverse variance weighted
- MR Egger

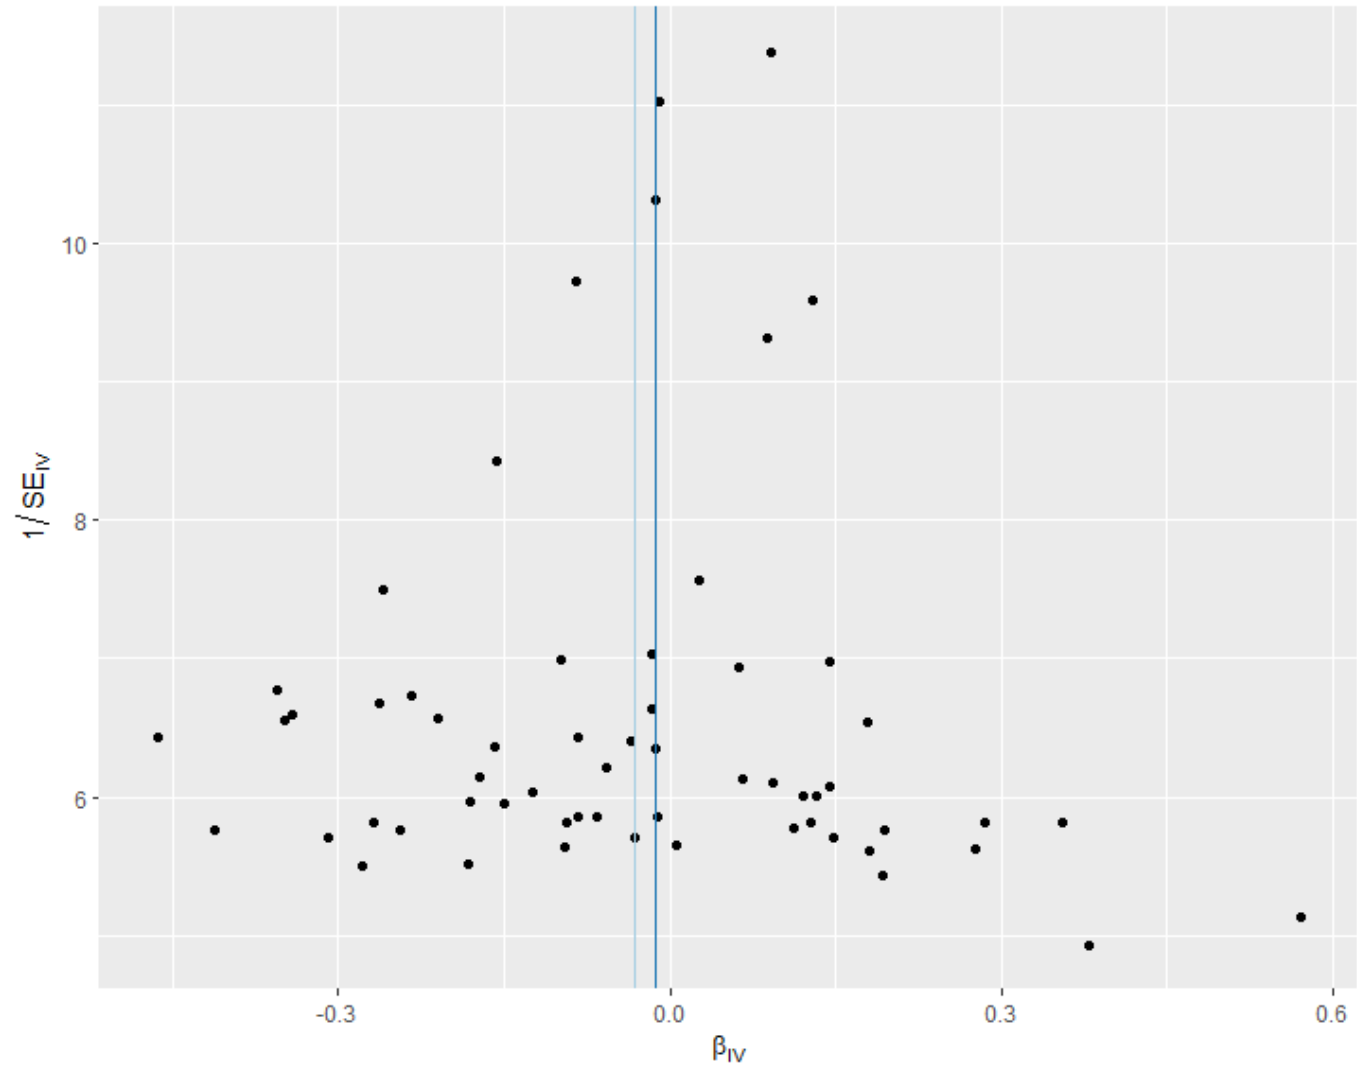

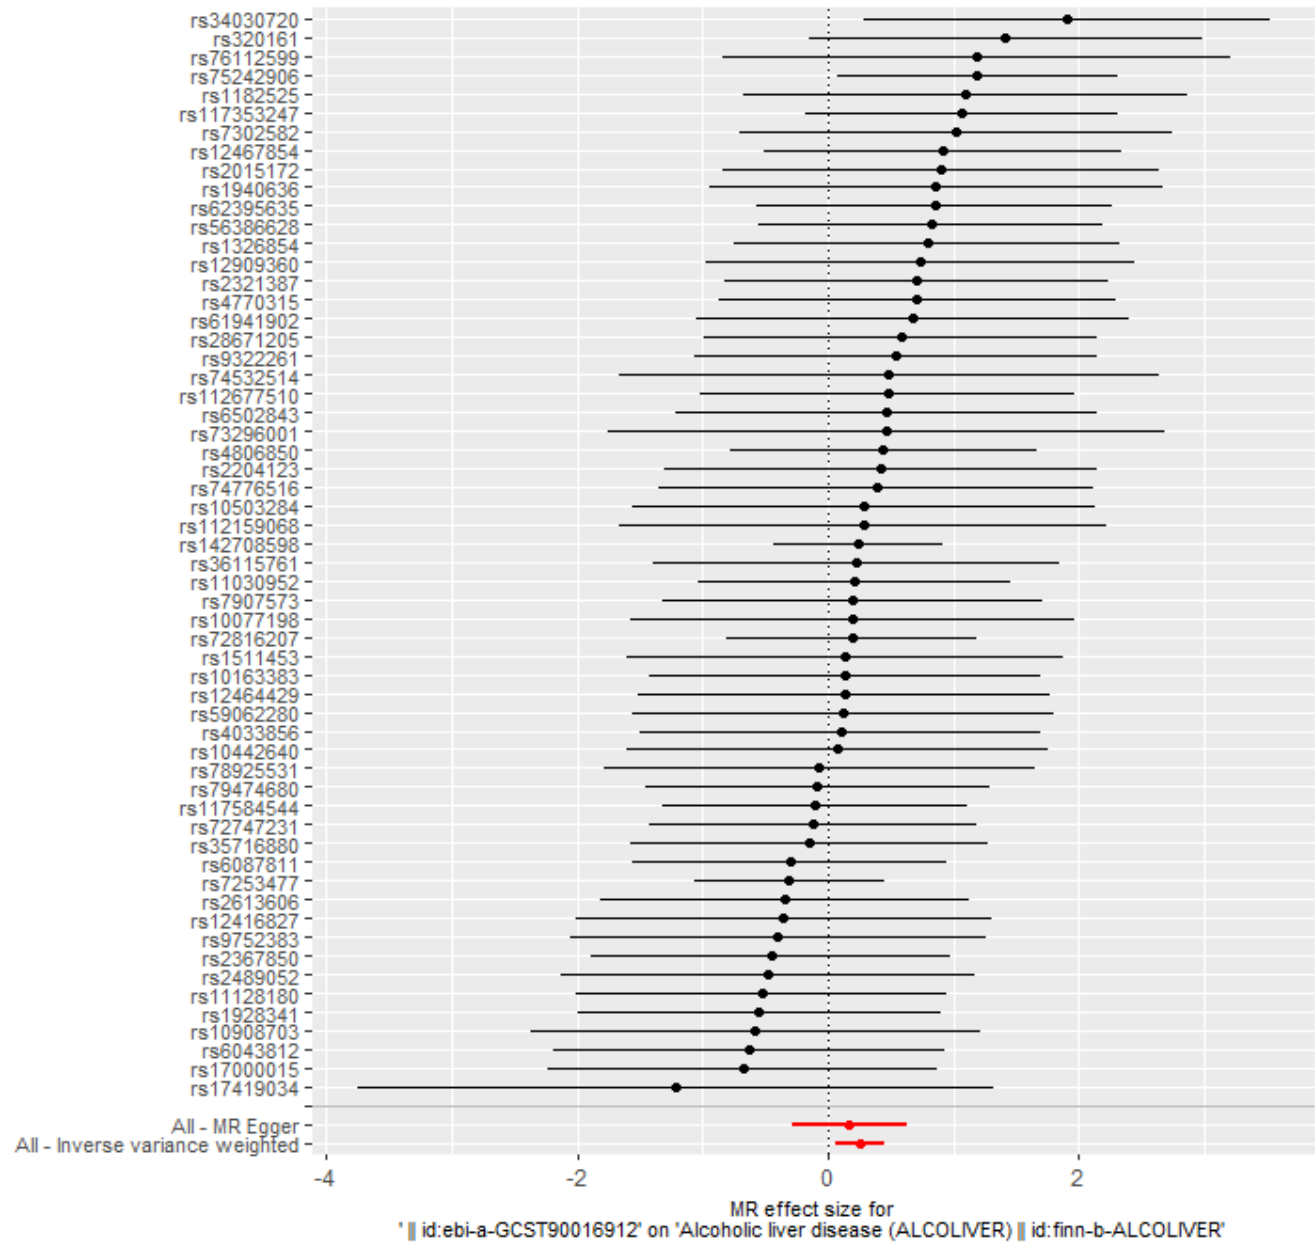

MR Test

- Inverse variance weighted
- MR Egger
- Simple mode
- Weighted median
- Weighted mode

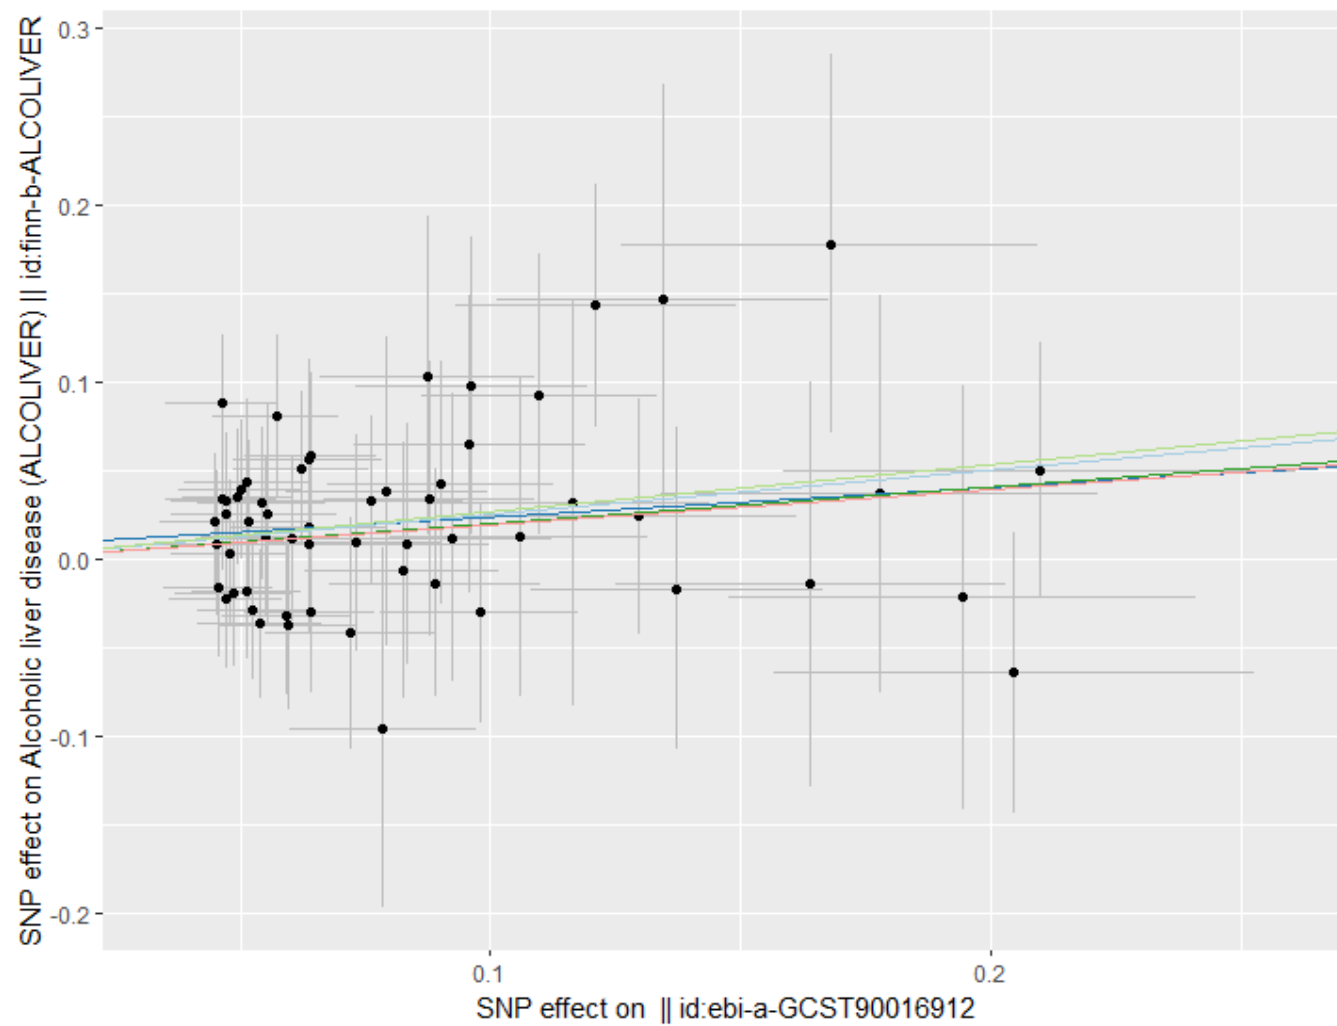



**Figure 169** Leave-one-out analysis, funnel plot, MR effect size and scatter plot for gut microbiota abundance (family Streptococcaceae id.1850) on primary biliary cirrhosis

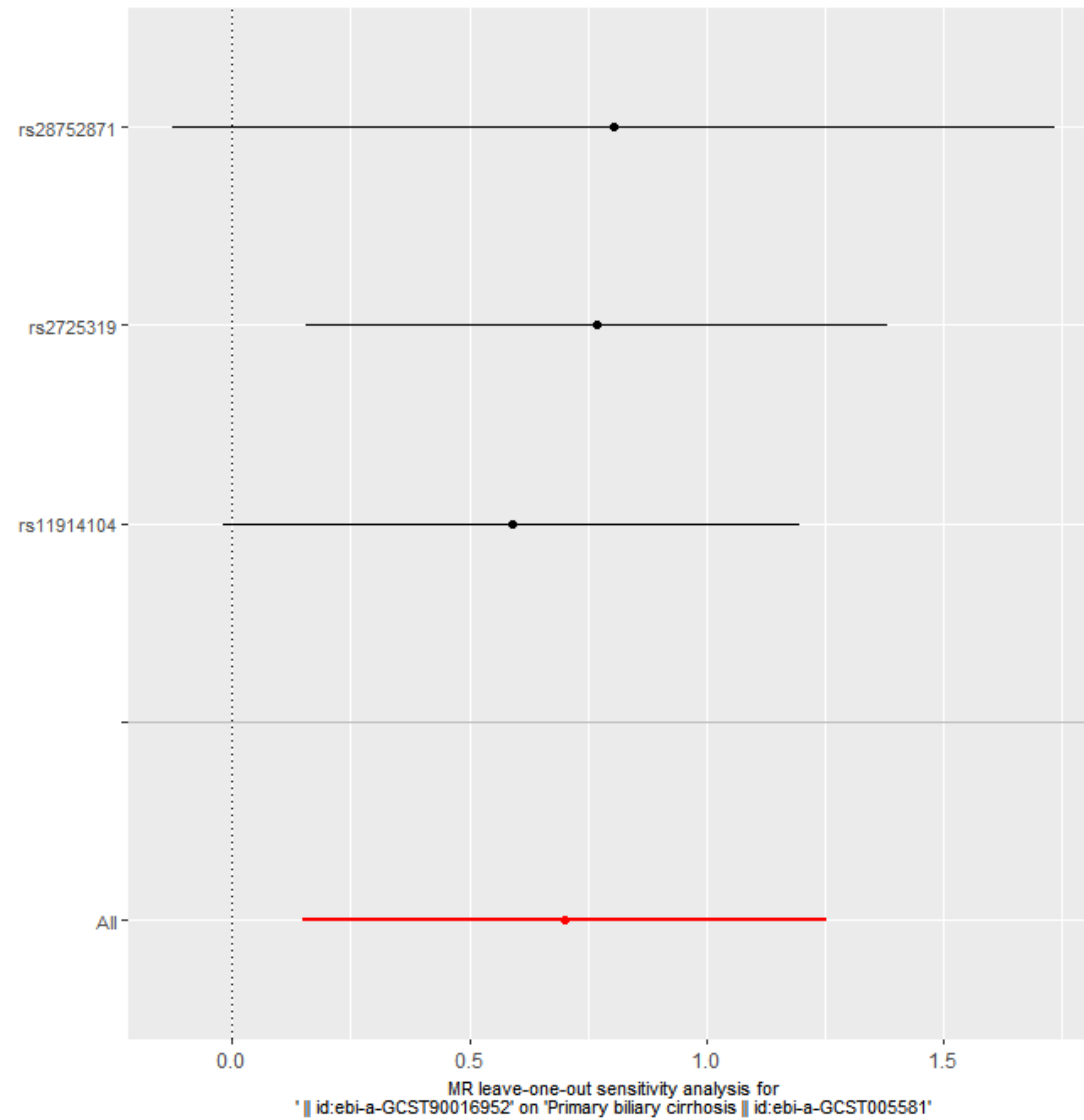

MR Method

- Inverse variance weighted
- MR Egger

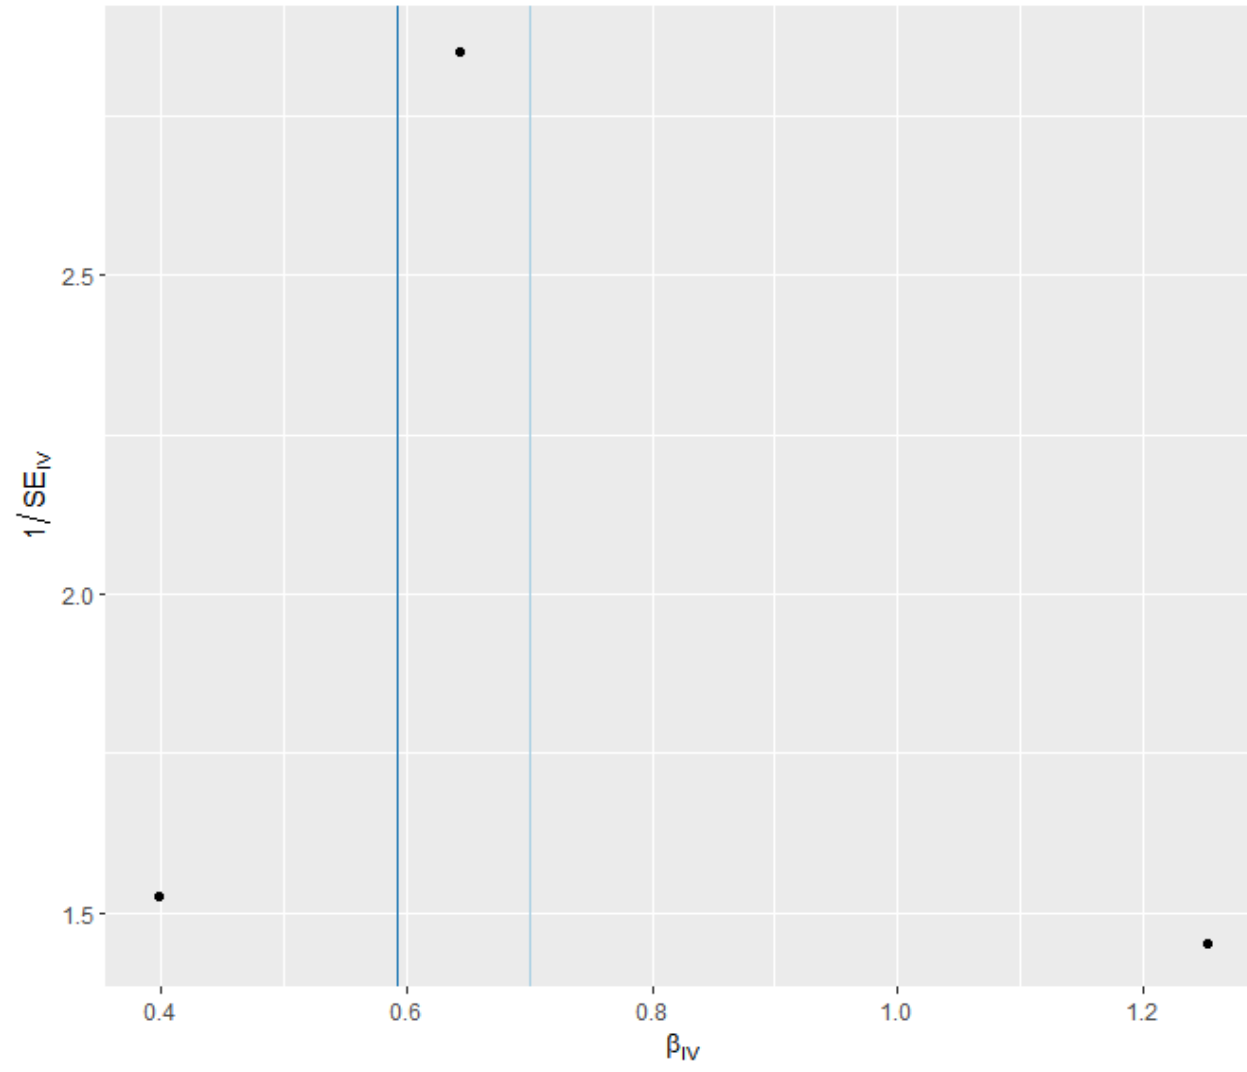

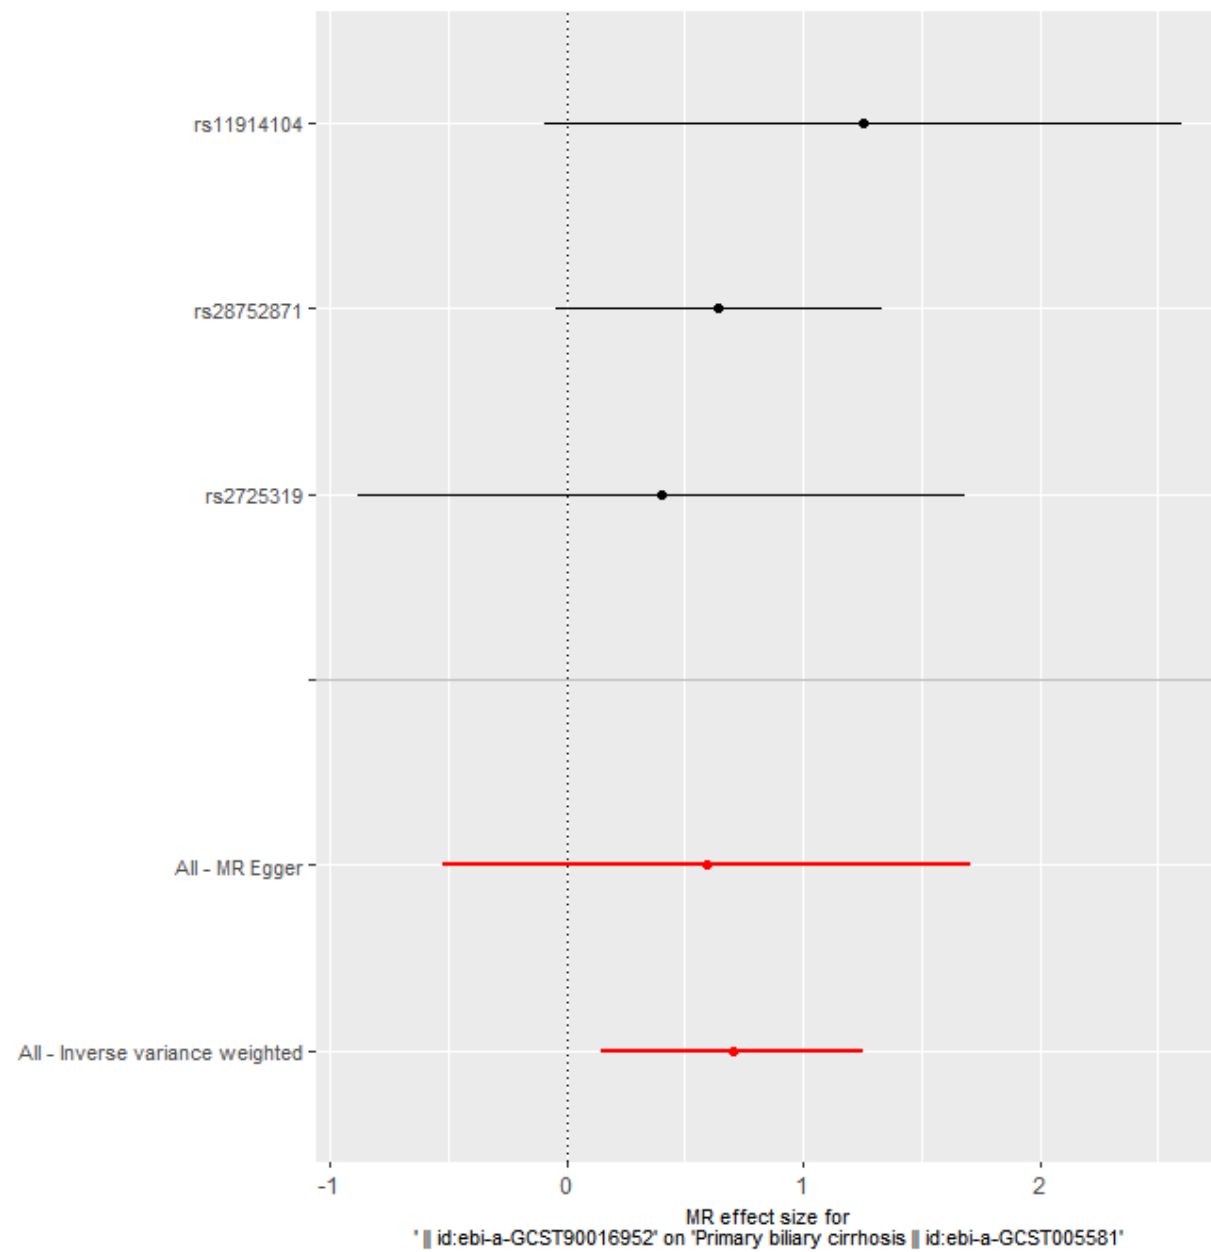

MR Test

- Inverse variance weighted
- MR Egger
- Simple mode
- Weighted median
- Weighted mode

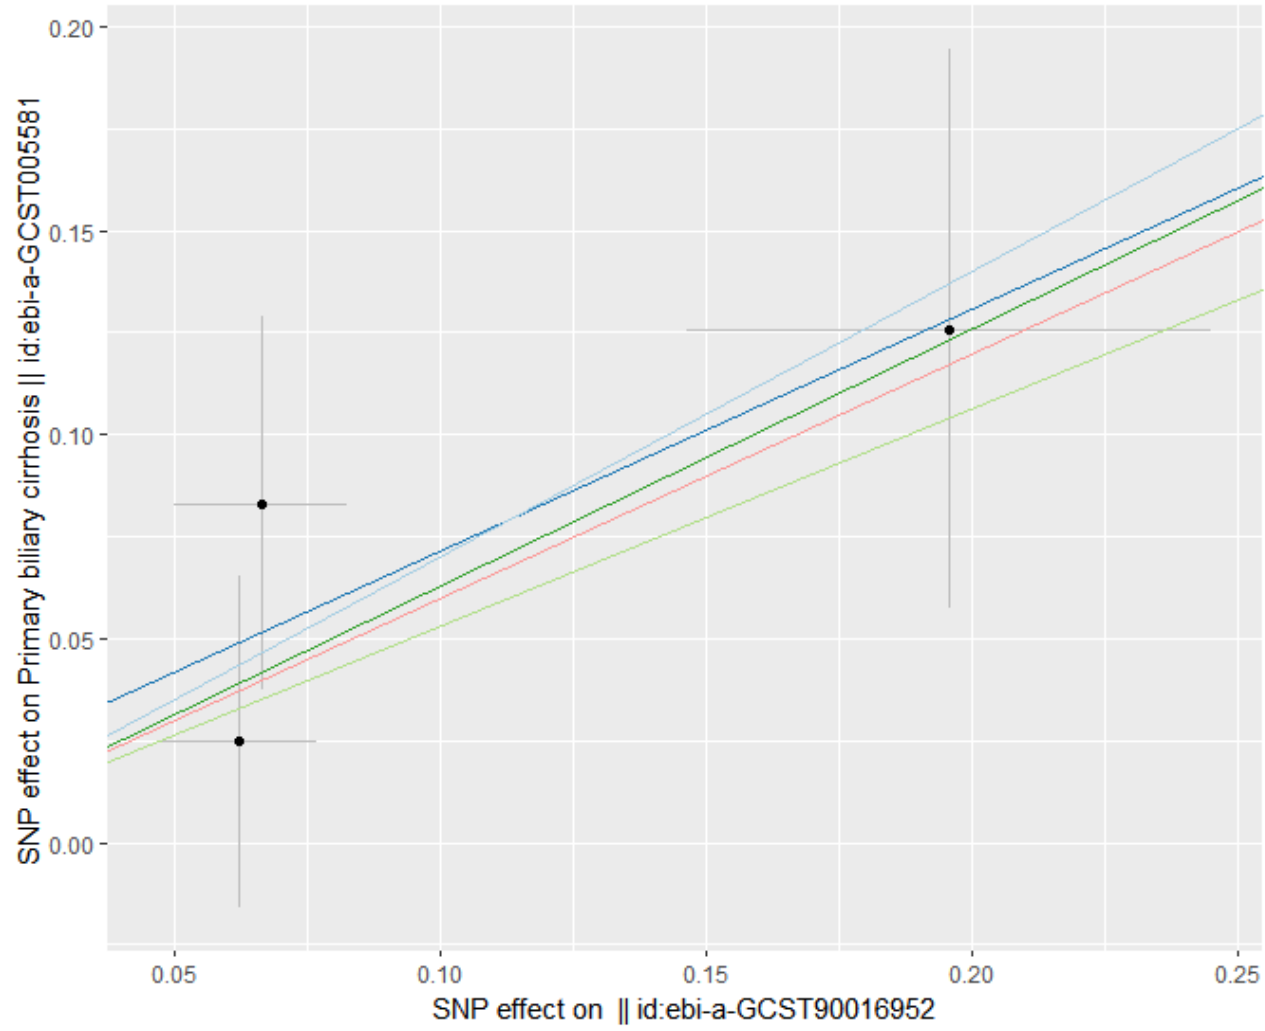

**Figure 170** Leave-one-out analysis, funnel plot, MR effect size and scatter plot for gut microbiota abundance (genus Akkermansia id.4037) on primary biliary cirrhosis

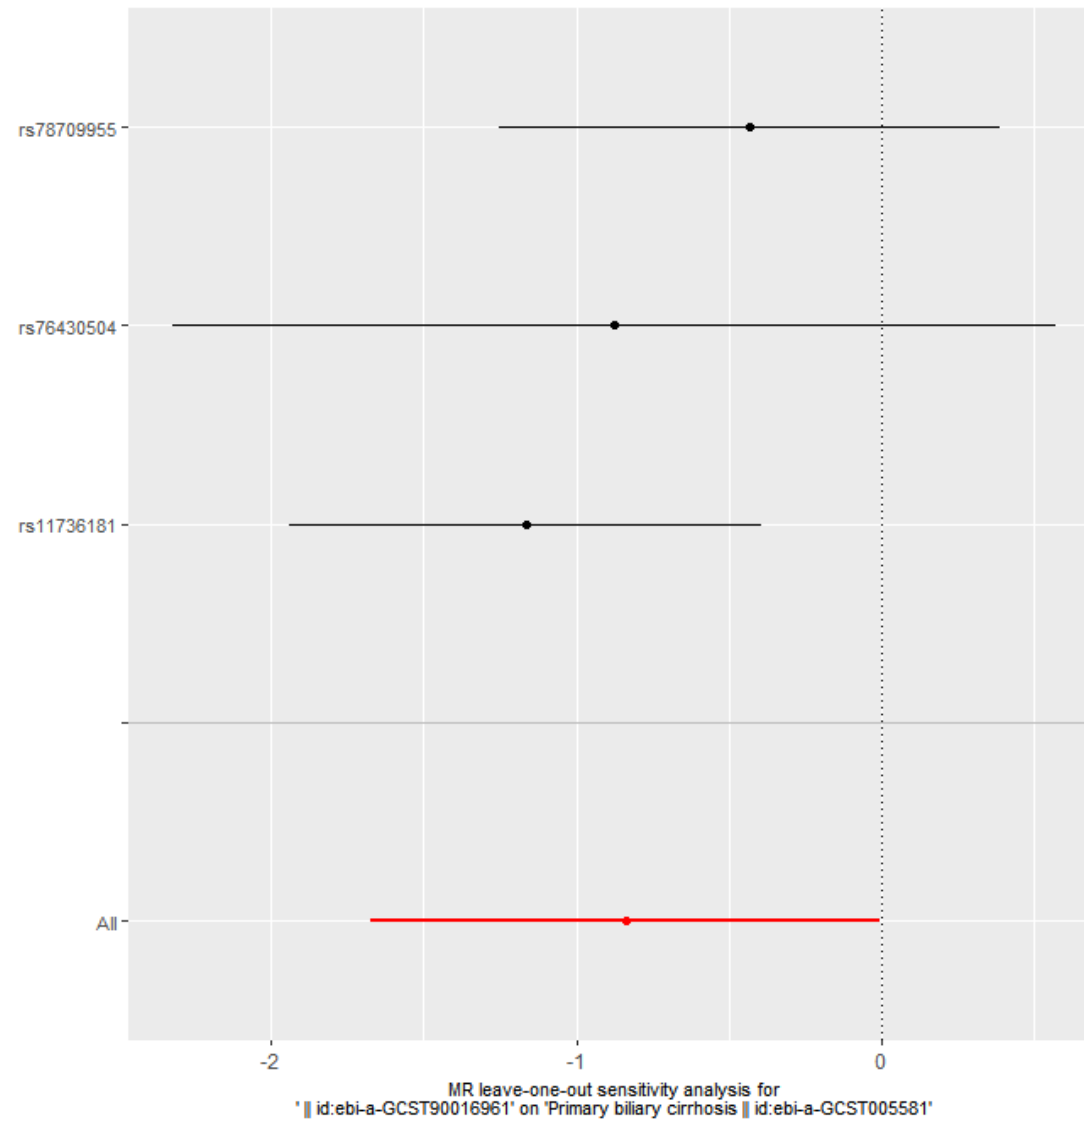

MR Method

- Inverse variance weighted
- MR Egger

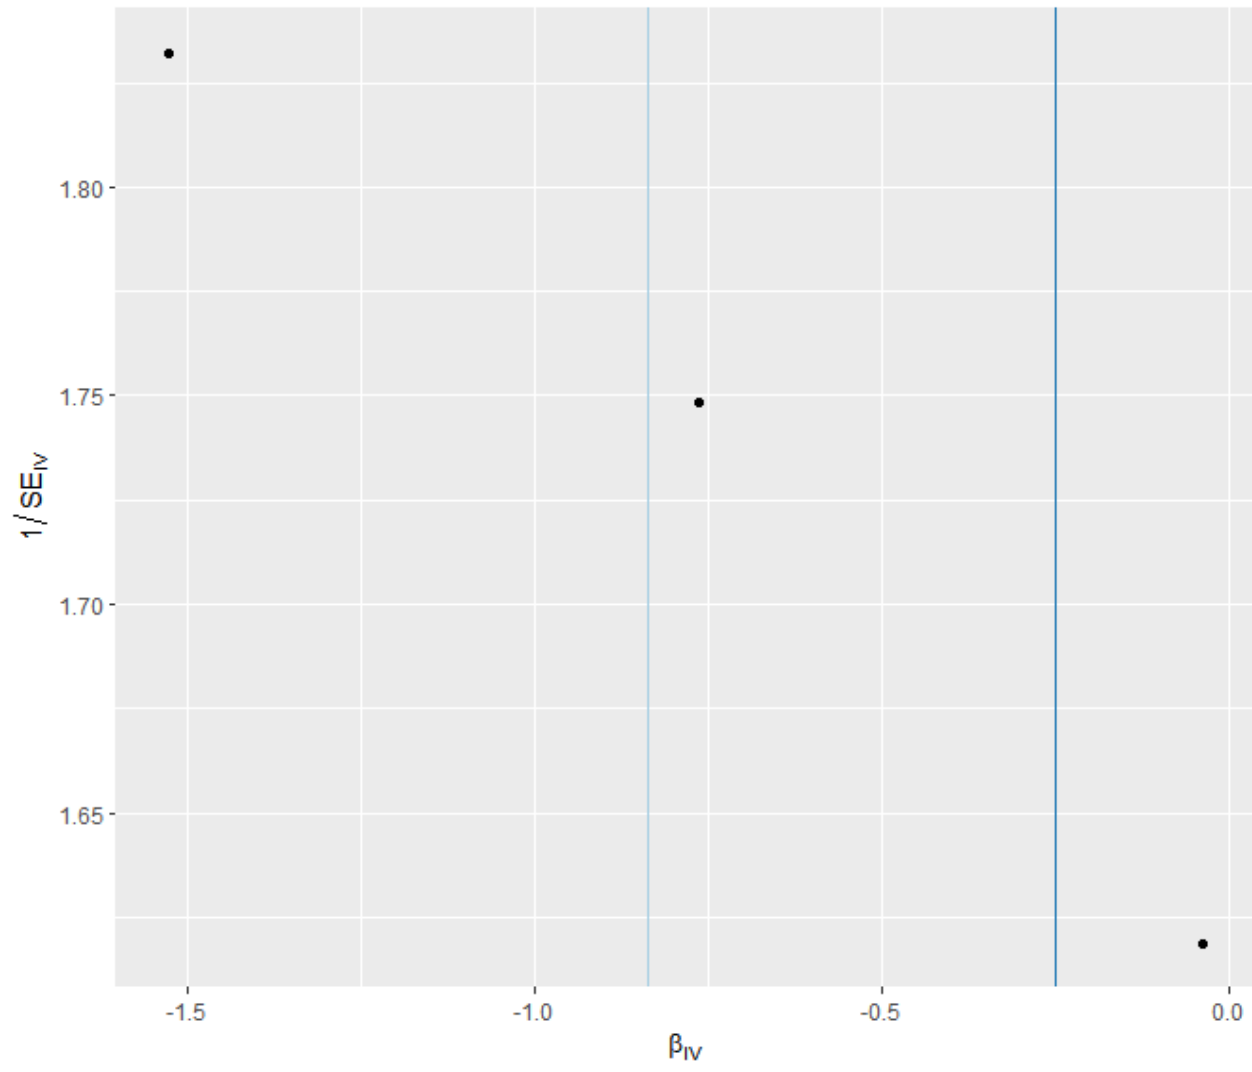

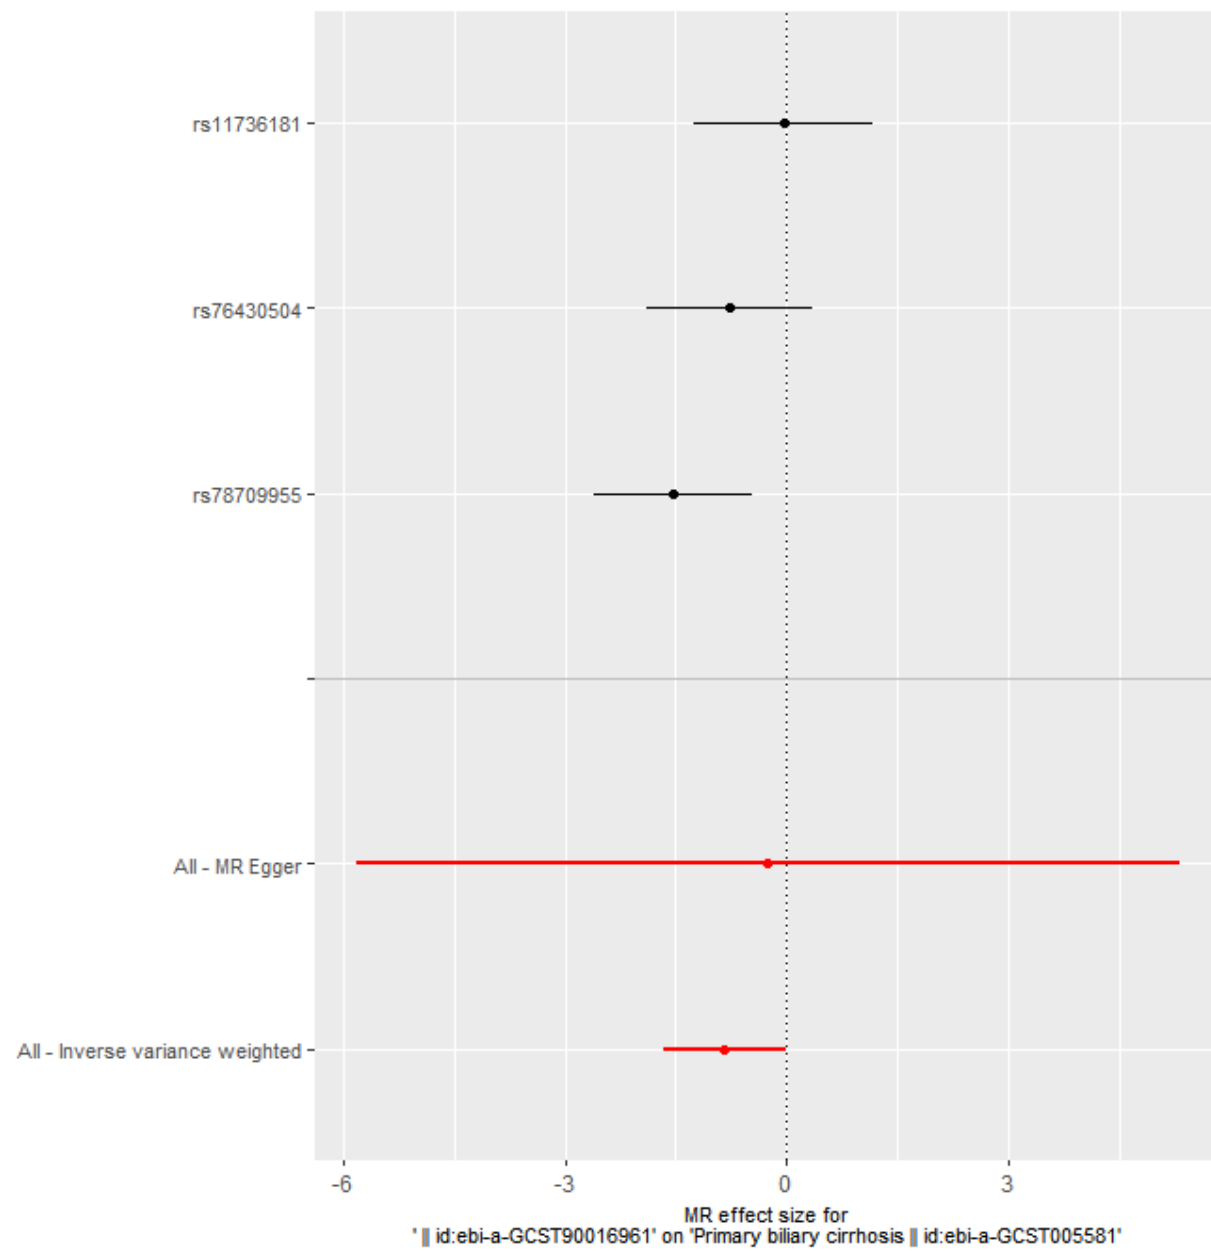

MR Test

- Inverse variance weighted
- MR Egger
- Simple mode
- Weighted median
- Weighted mode

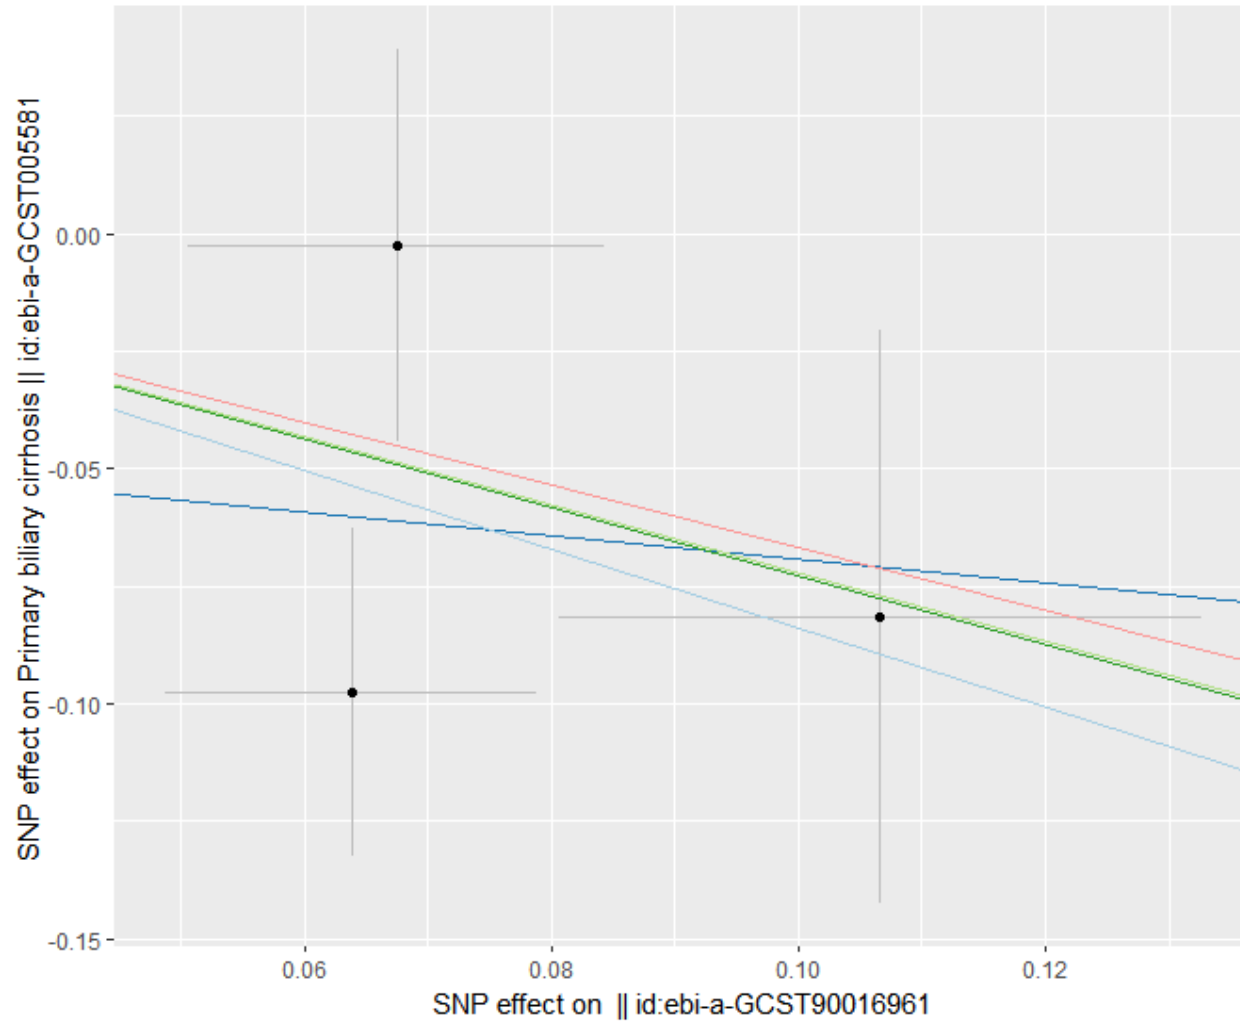



**Figure 171** Leave-one-out analysis, funnel plot, MR effect size and scatter plot for gut microbiota abundance (genus *Desulfovibrio* id.3173) on primary biliary cirrhosis

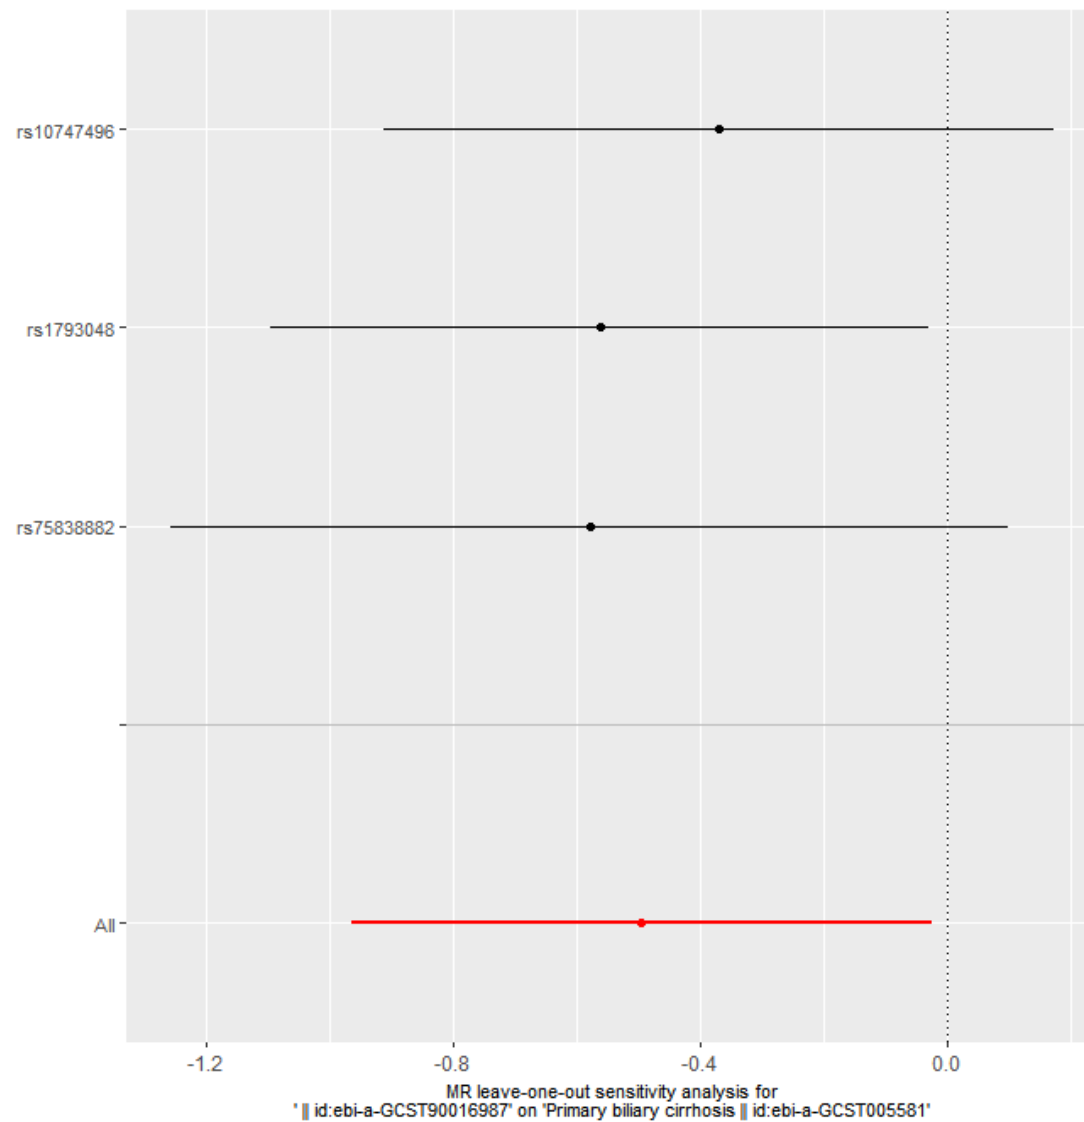

MR Method

- Inverse variance weighted
- MR Egger

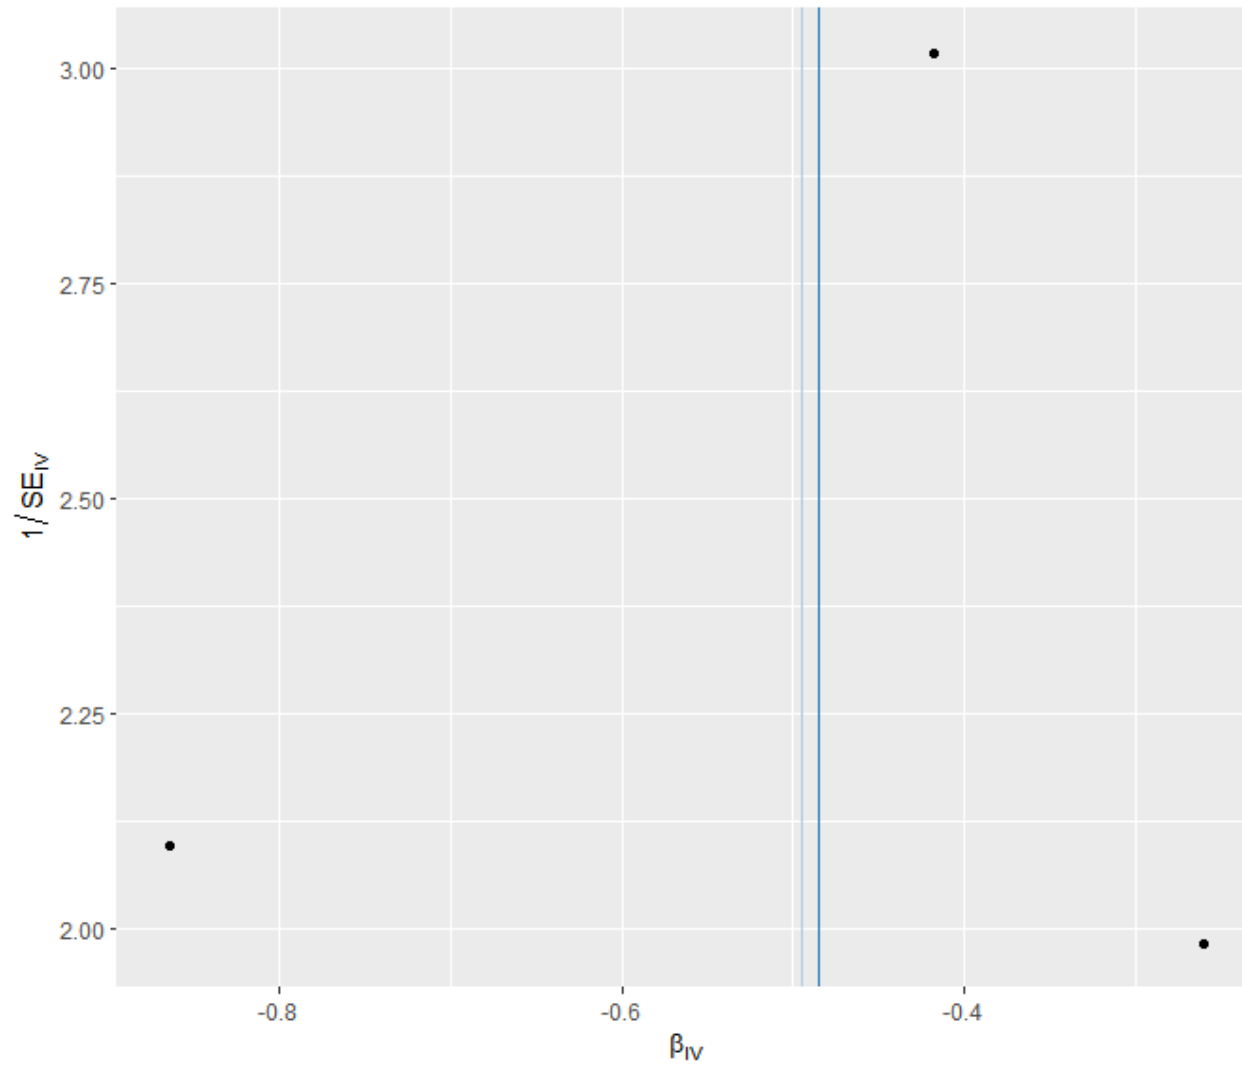

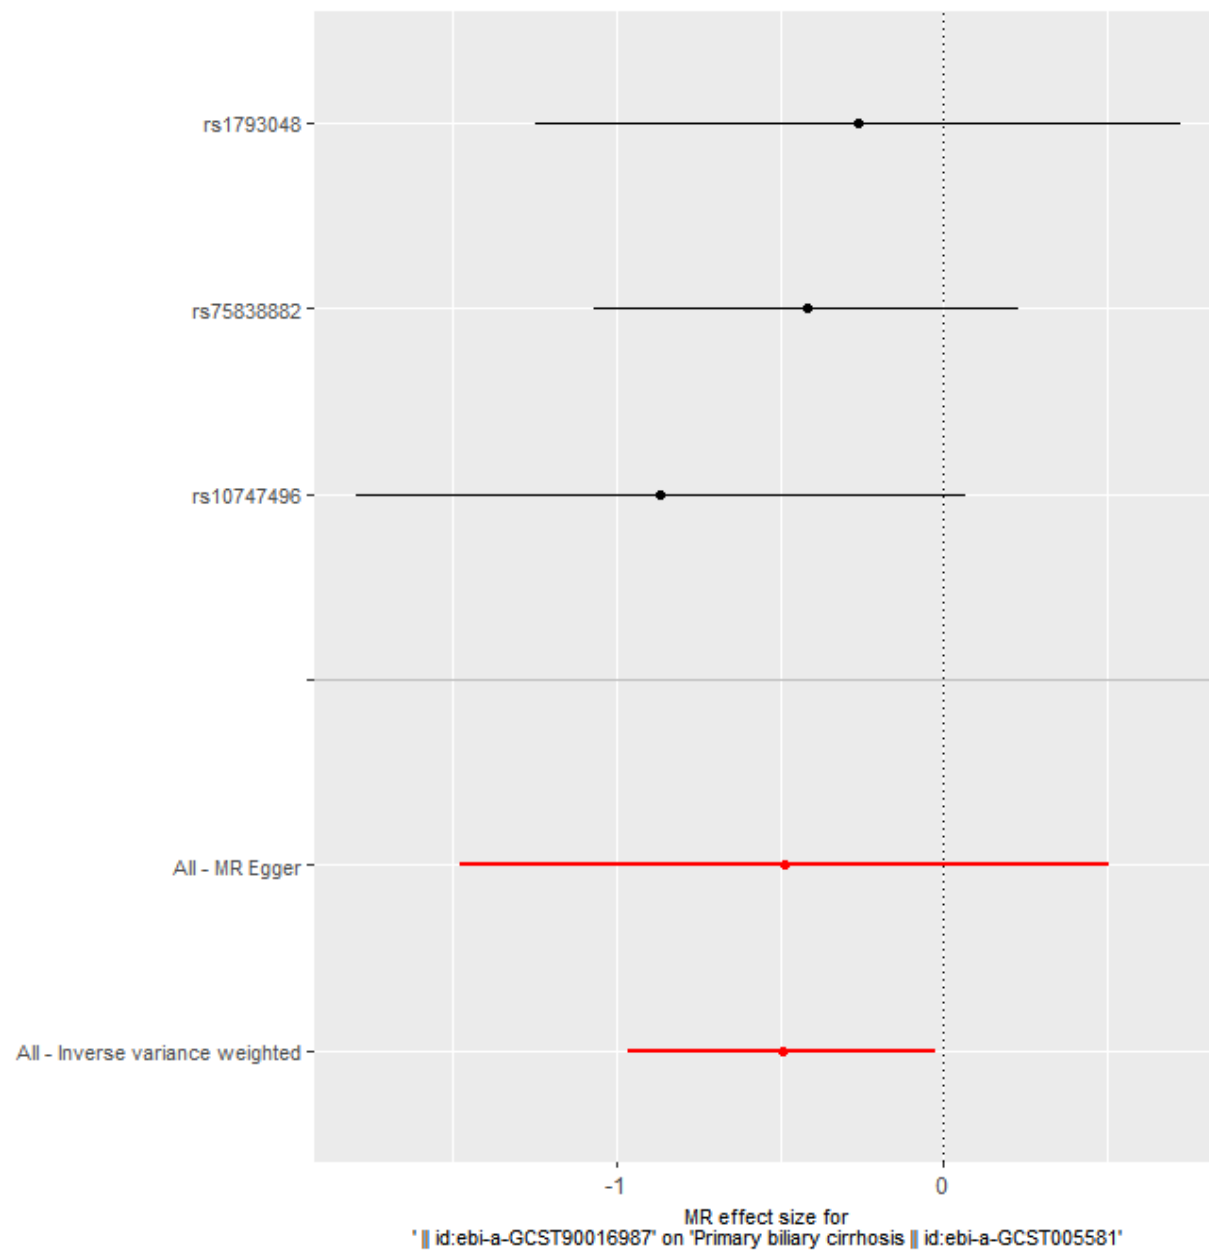

MR Test

- Inverse variance weighted
- MR Egger
- Simple mode
- Weighted median
- Weighted mode

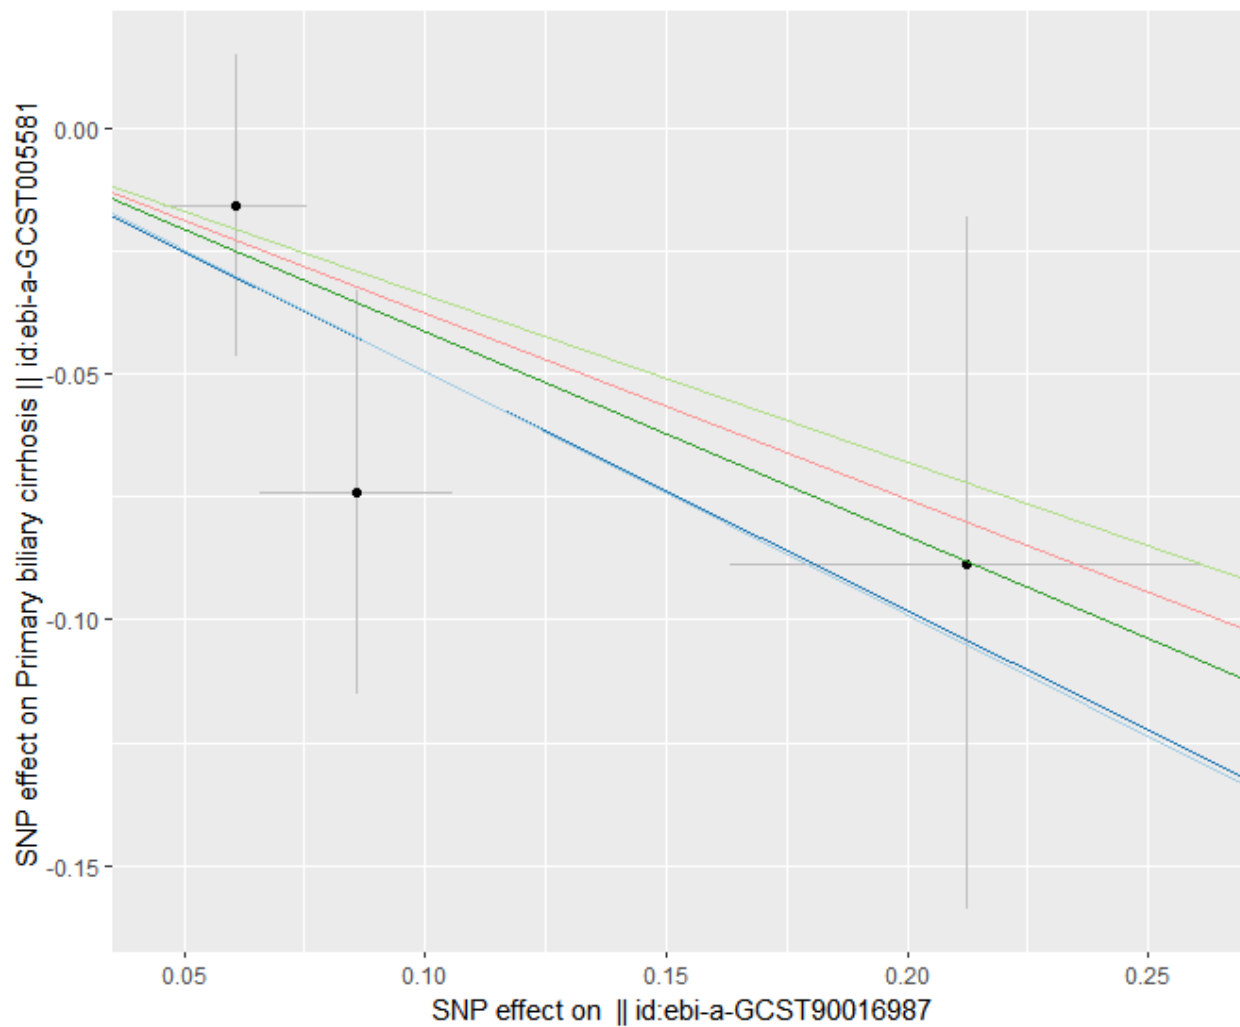

**Figure 172** Leave-one-out analysis, funnel plot, MR effect size and scatter plot for gut microbiota abundance (genus *Dialister* id.2183) on primary biliary cirrhosis

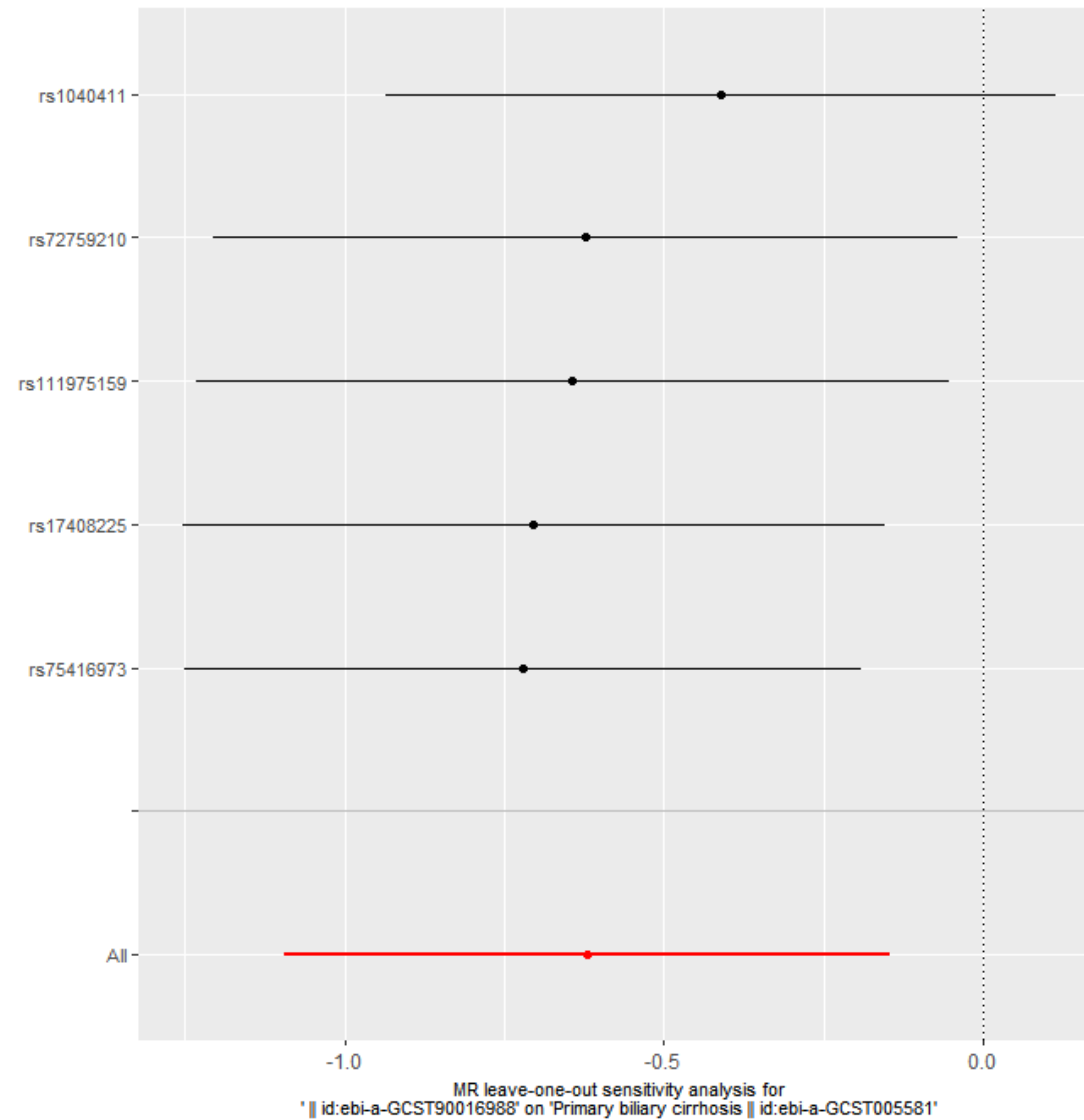

MR Method

- Inverse variance weighted
- MR Egger

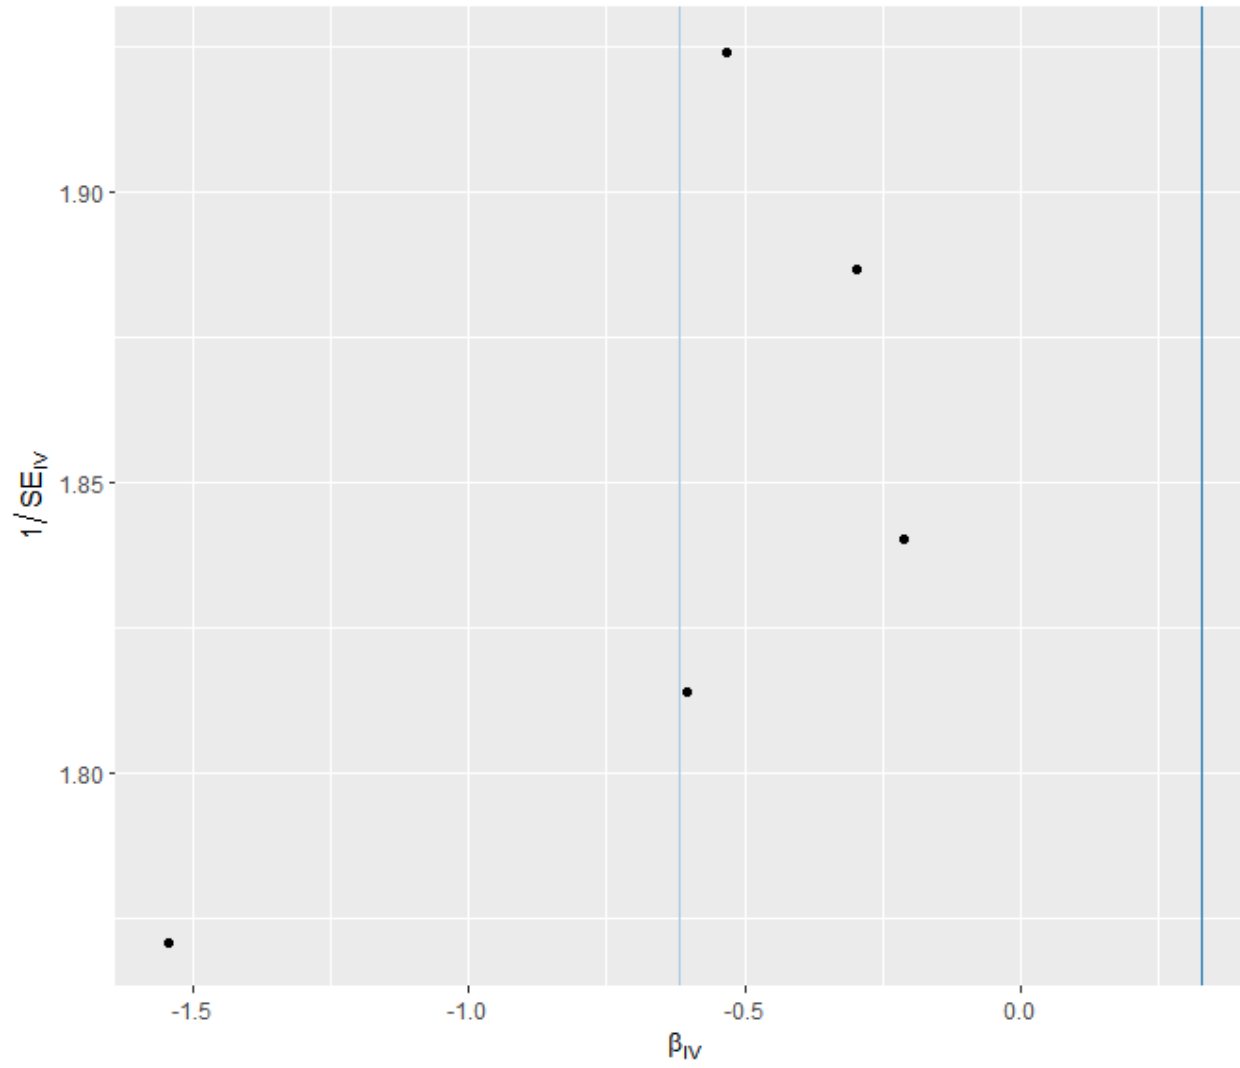

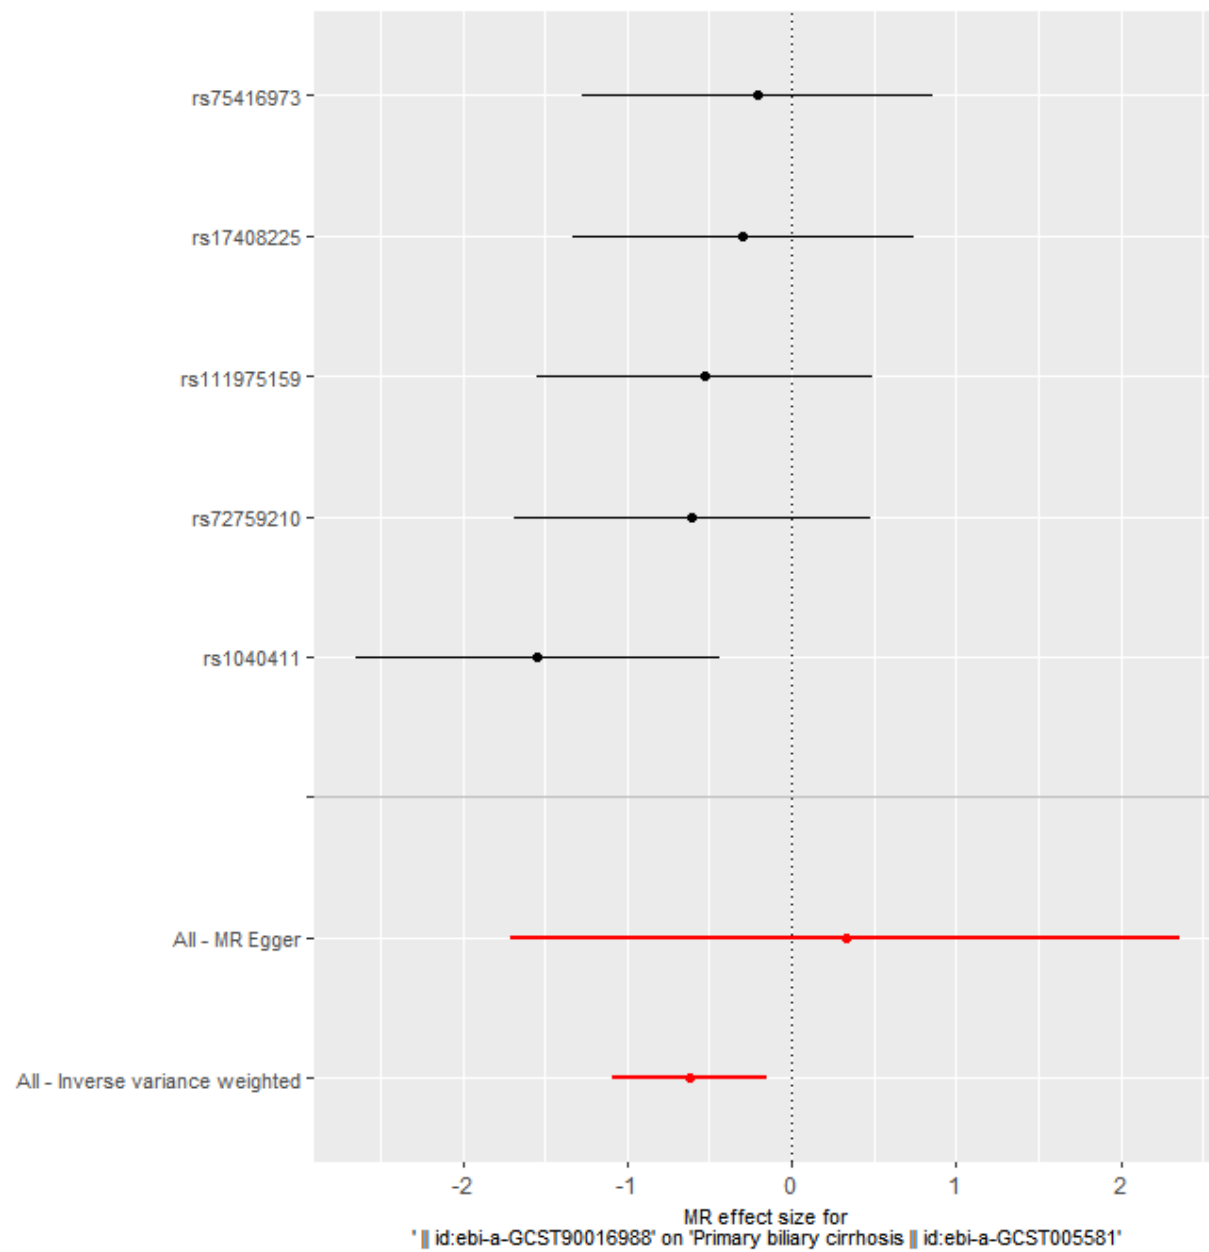

MR Test

- Inverse variance weighted
- MR Egger
- Simple mode
- Weighted median
- Weighted mode

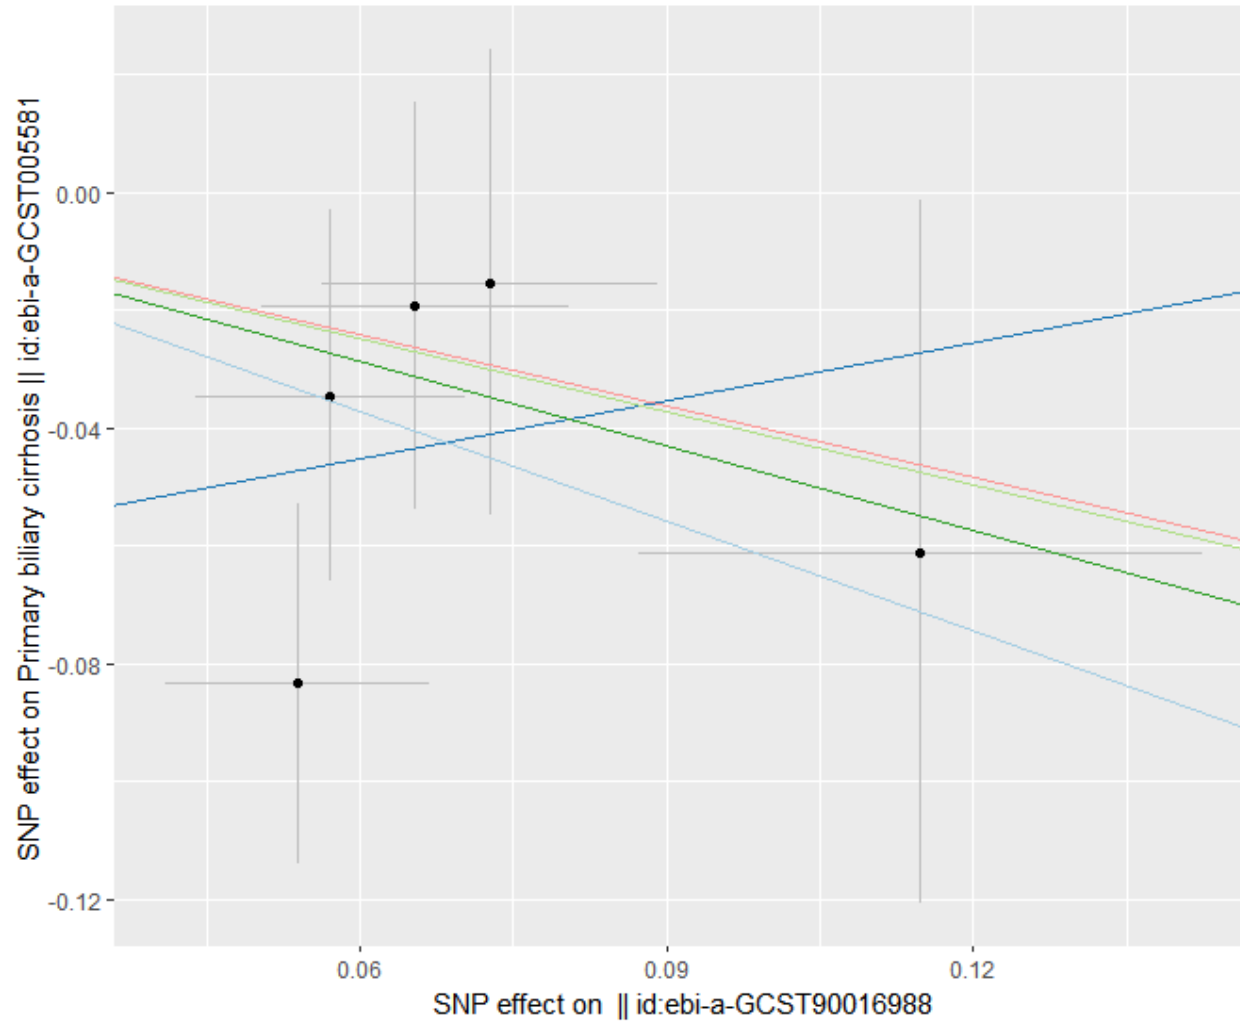



**Figure 173** Leave-one-out analysis, funnel plot, MR effect size and scatter plot for gut microbiota abundance (genus *Eubacterium nodatum* group id.11297) on primary biliary cirrhosis

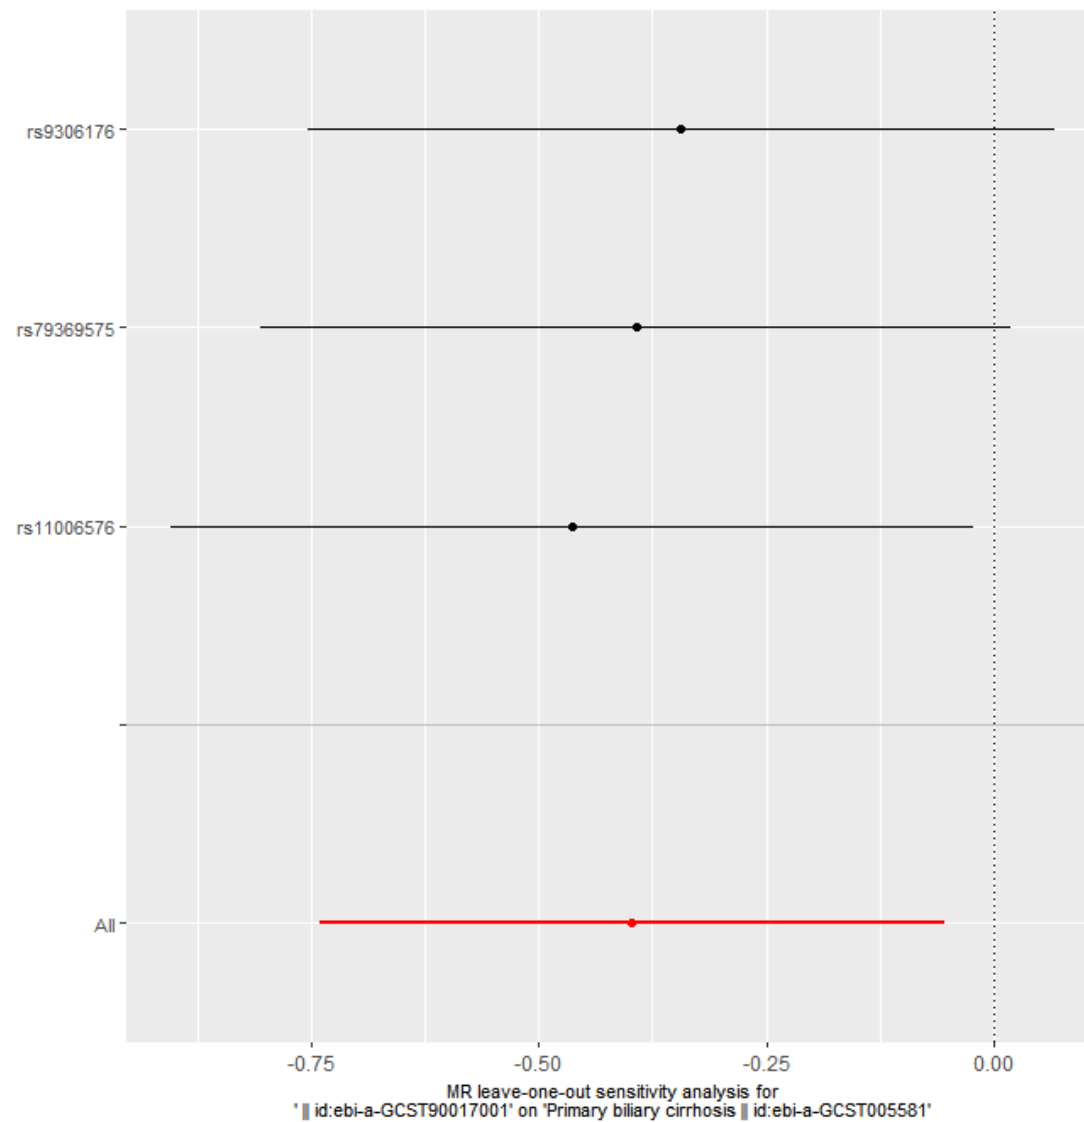

MR Method

- Inverse variance weighted
- MR Egger

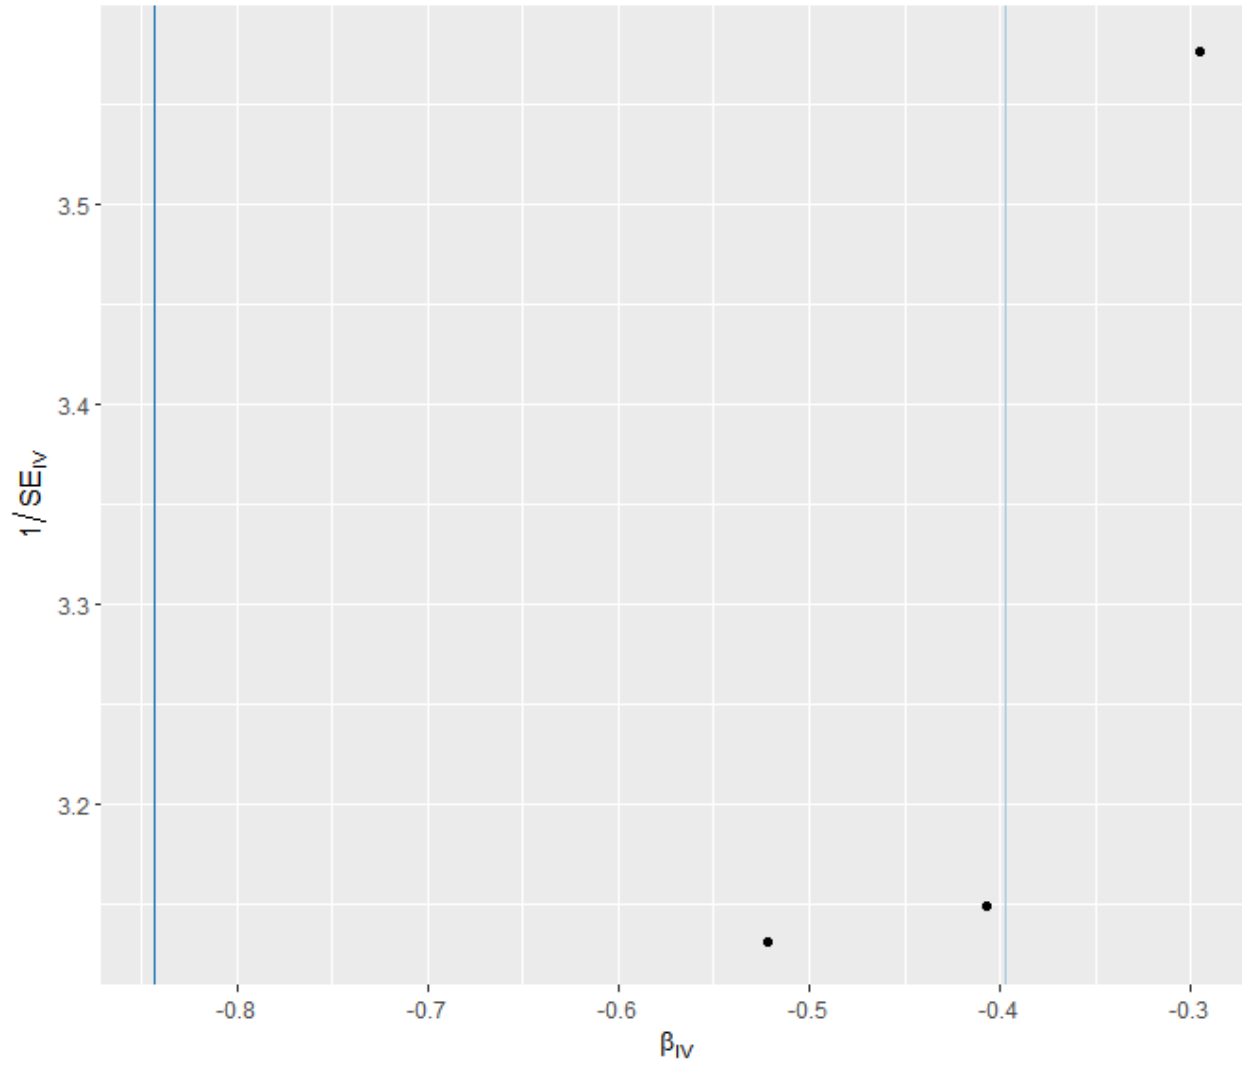

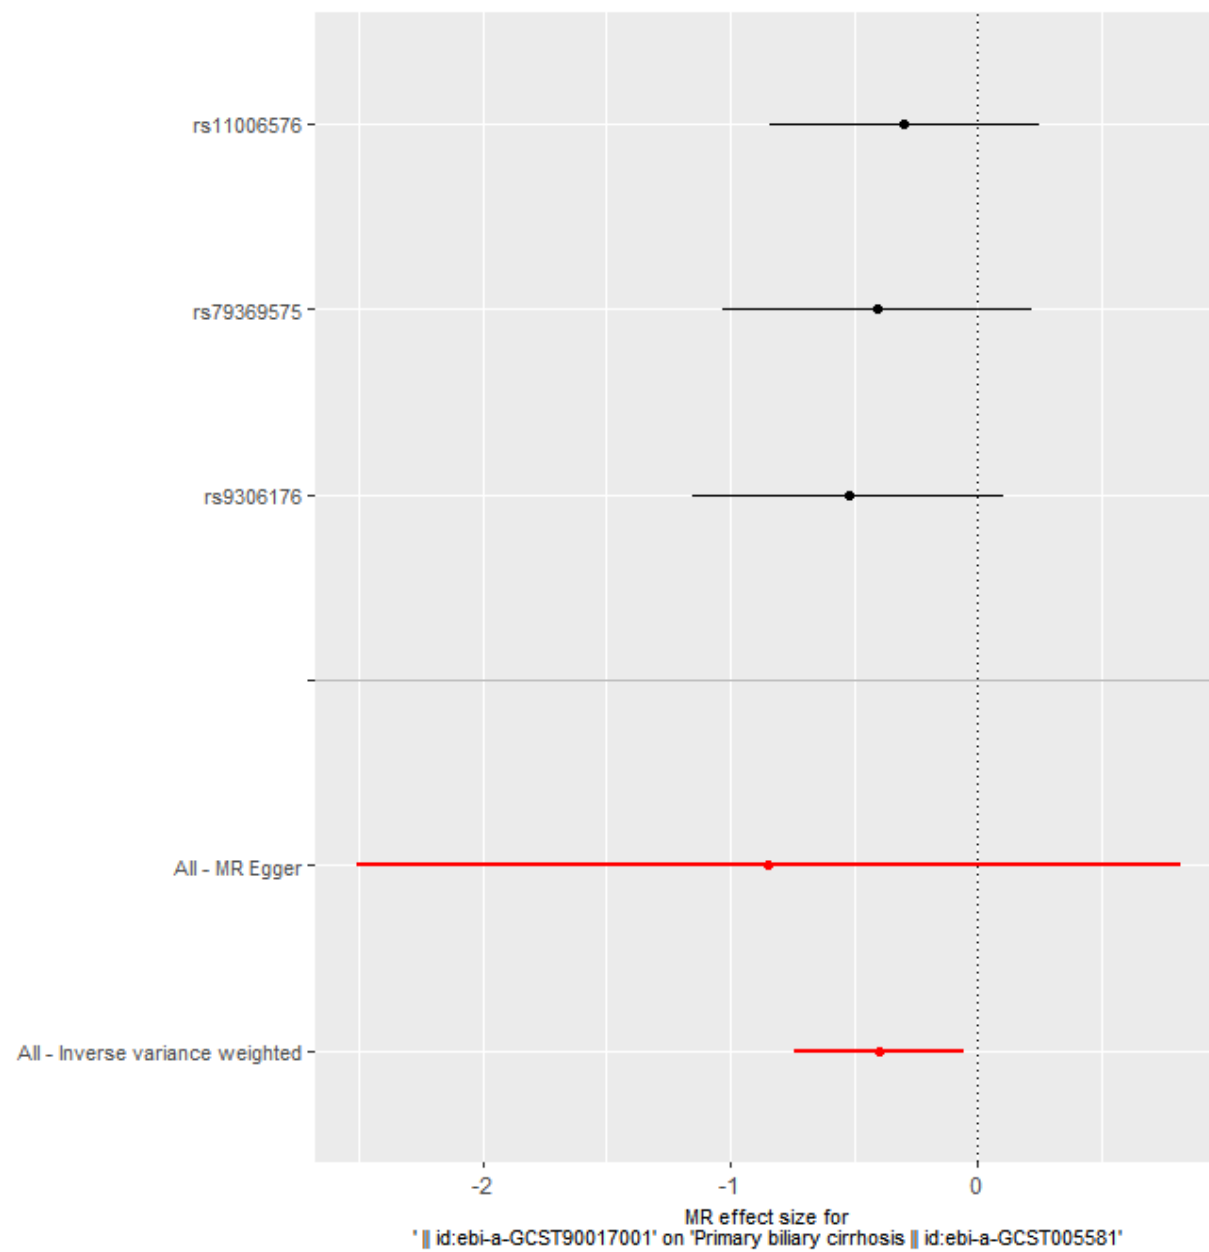

MR Test

- Inverse variance weighted
- MR Egger
- Simple mode
- Weighted median
- Weighted mode

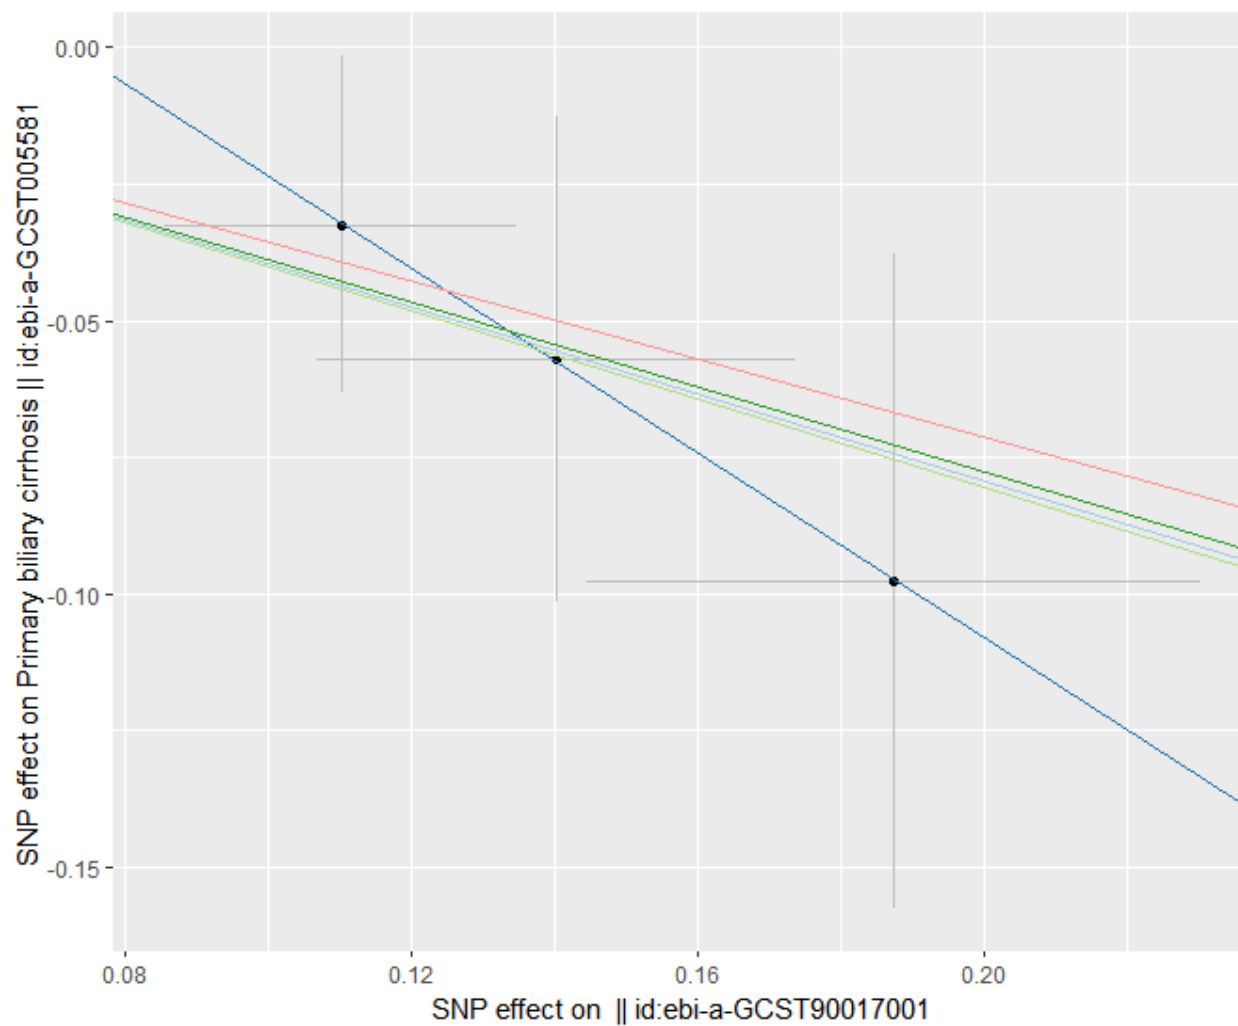

**Figure 174** Leave-one-out analysis, funnel plot, MR effect size and scatter plot for gut microbiota abundance (genus *Lachnospiraceae* UCG010 id.11330) on primary biliary cirrhosis

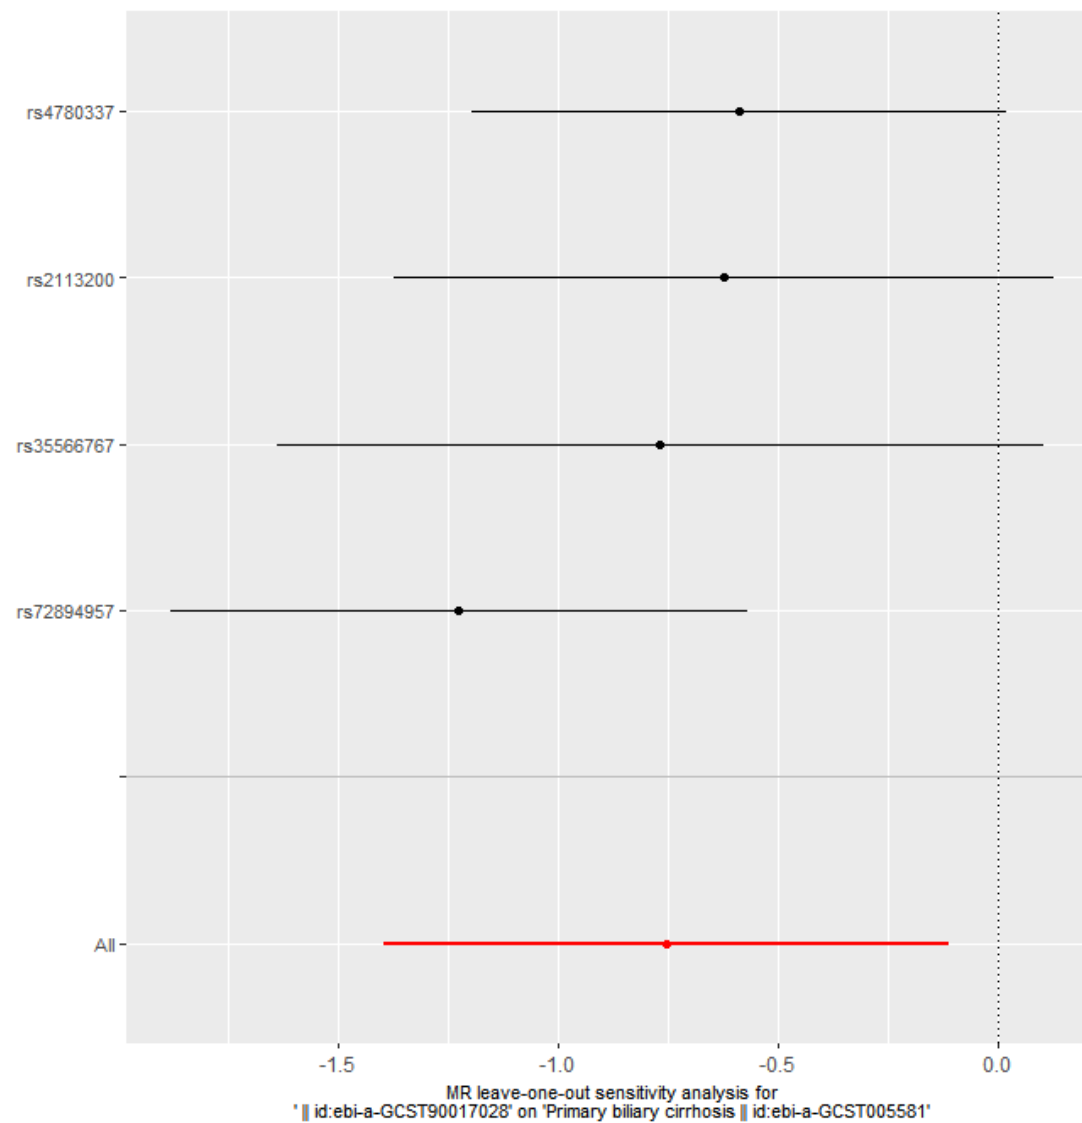

MR Method

- Inverse variance weighted
- MR Egger

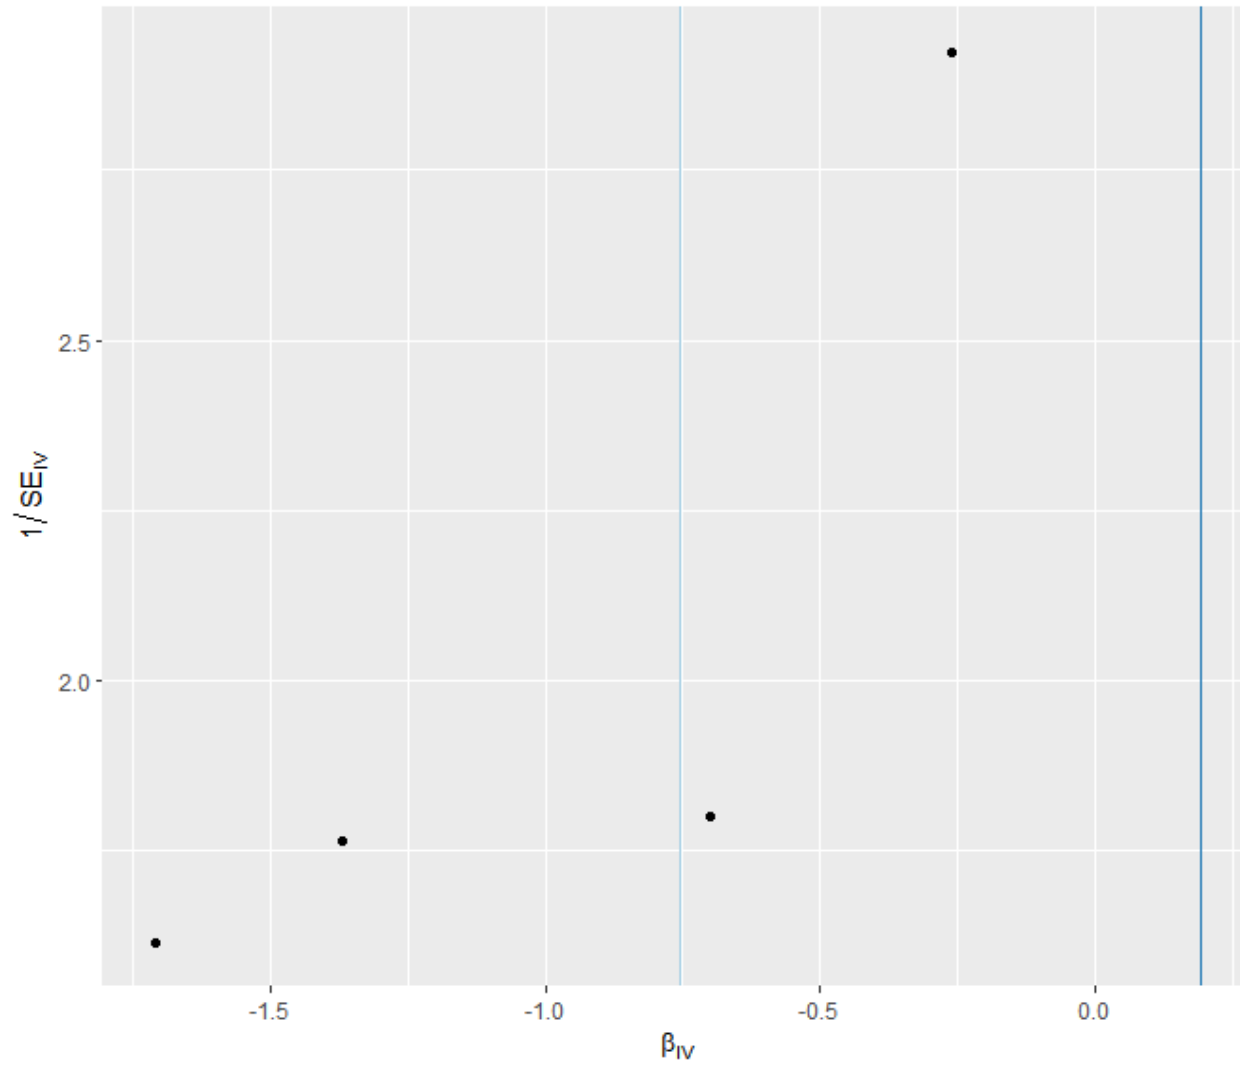

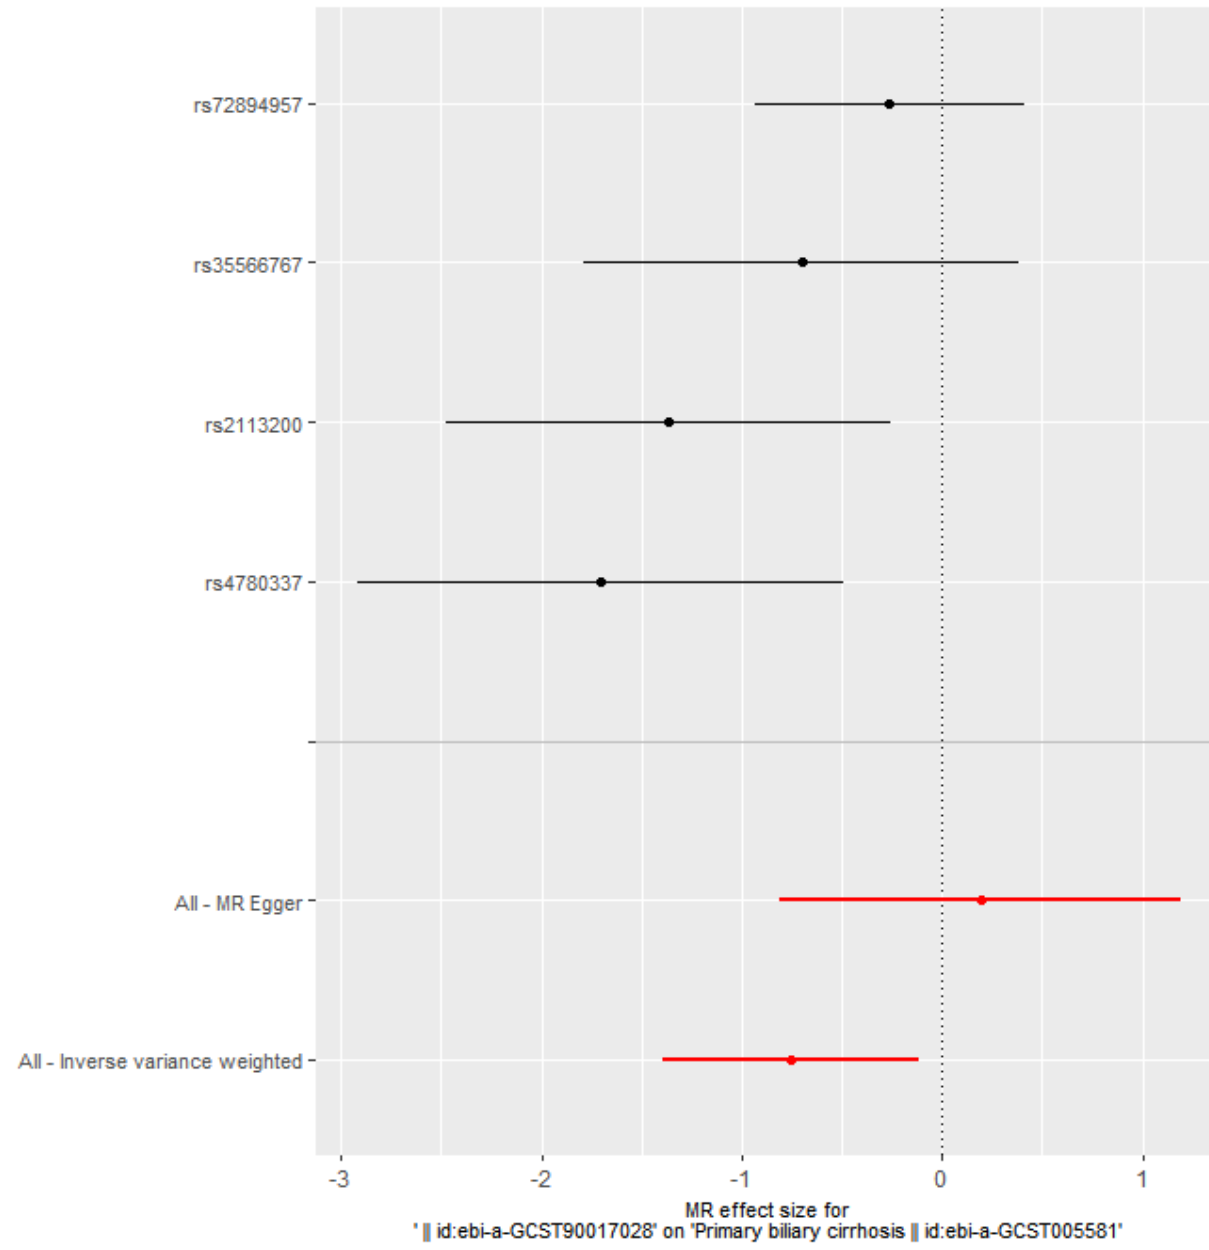

MR Test

- Inverse variance weighted
- MR Egger
- Simple mode
- Weighted median
- Weighted mode

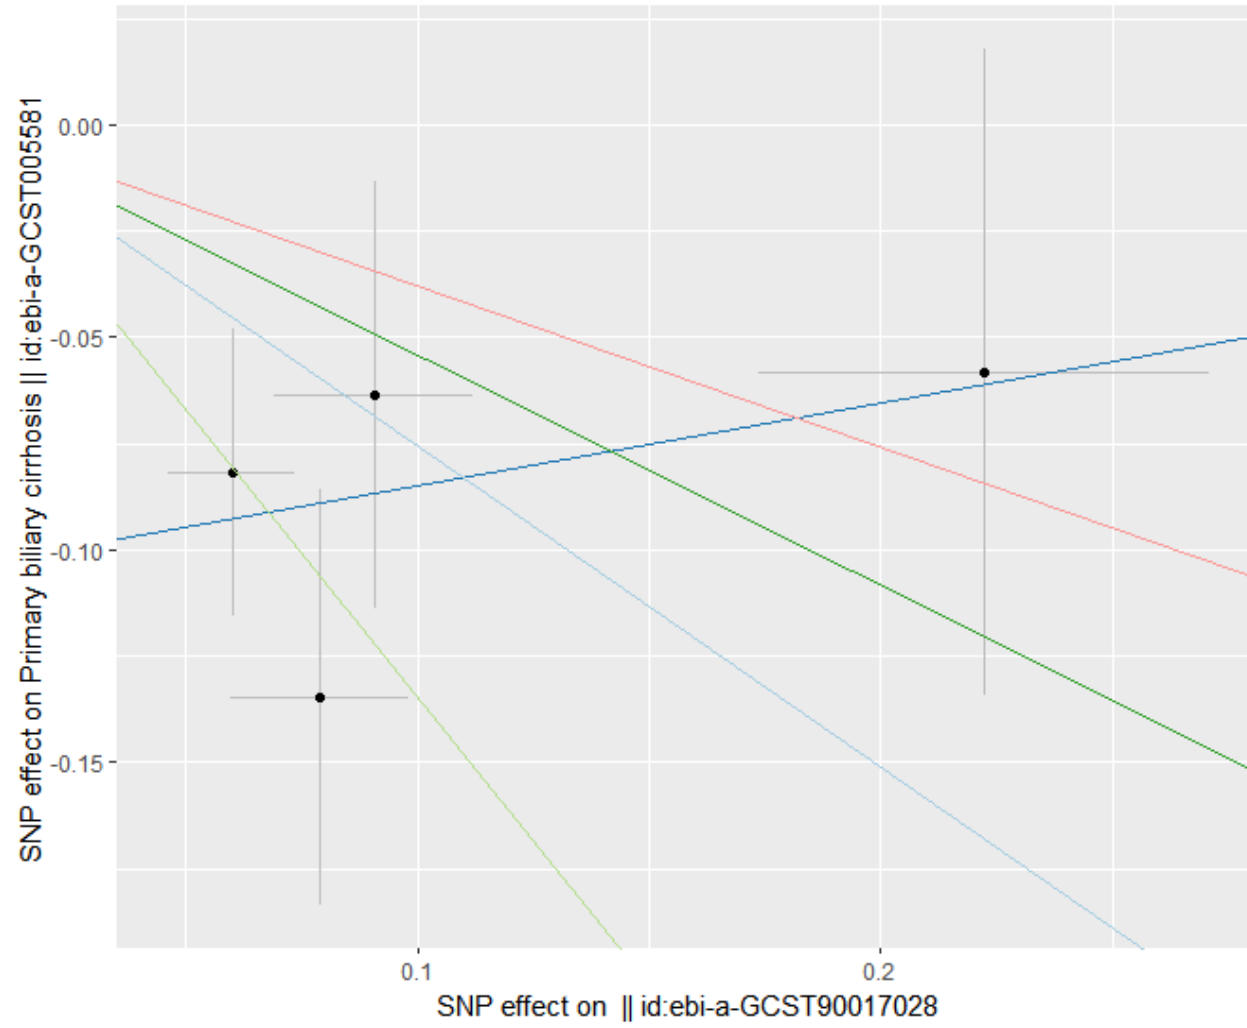



**Figure 175** Leave-one-out analysis, funnel plot, MR effect size and scatter plot for gut microbiota abundance (genus Marvinbryantia id.2005) on primary biliary cirrhosis

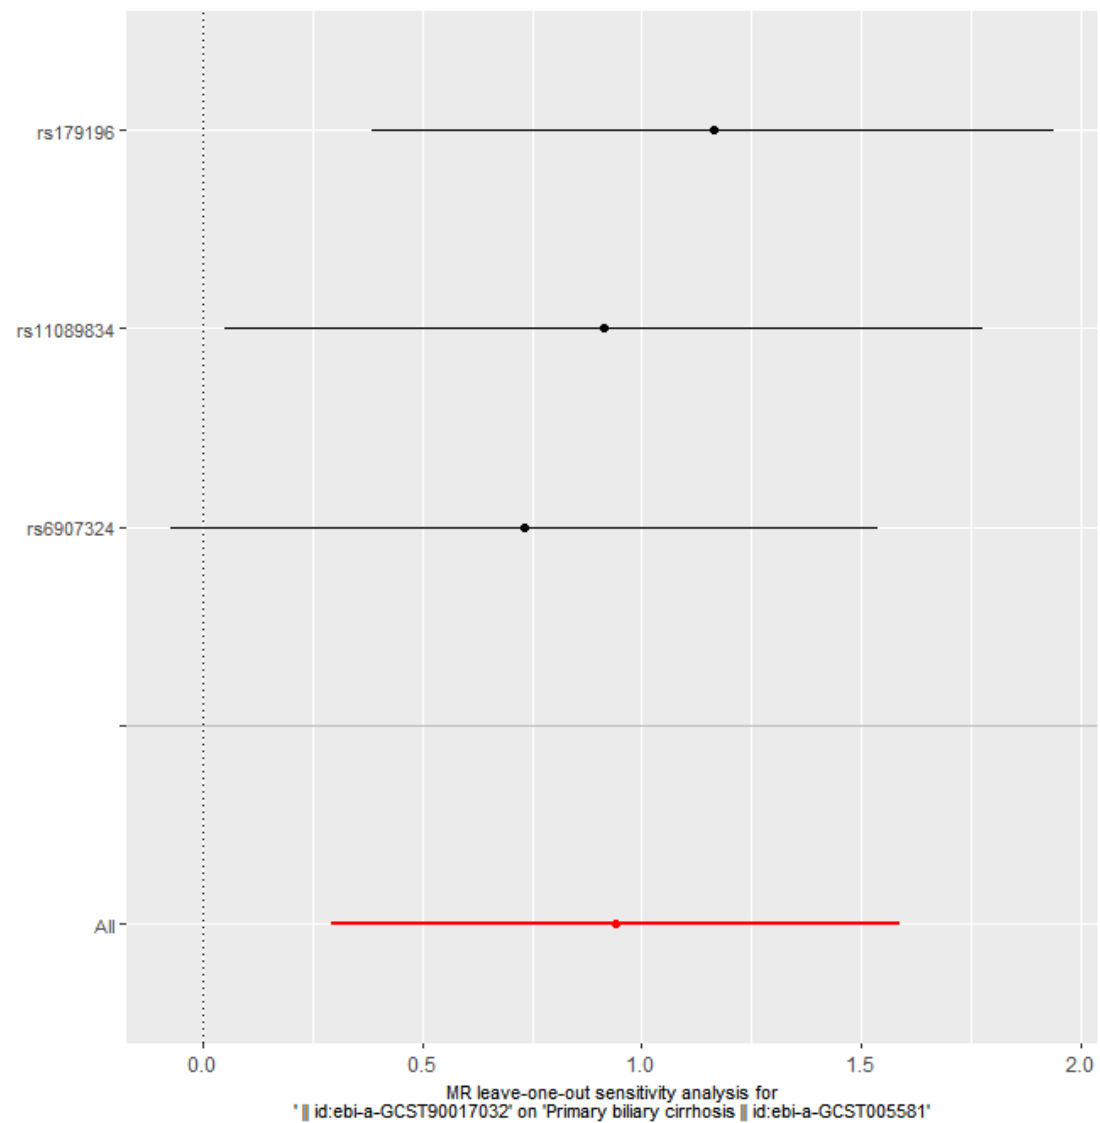

MR Method

- Inverse variance weighted
- MR Egger

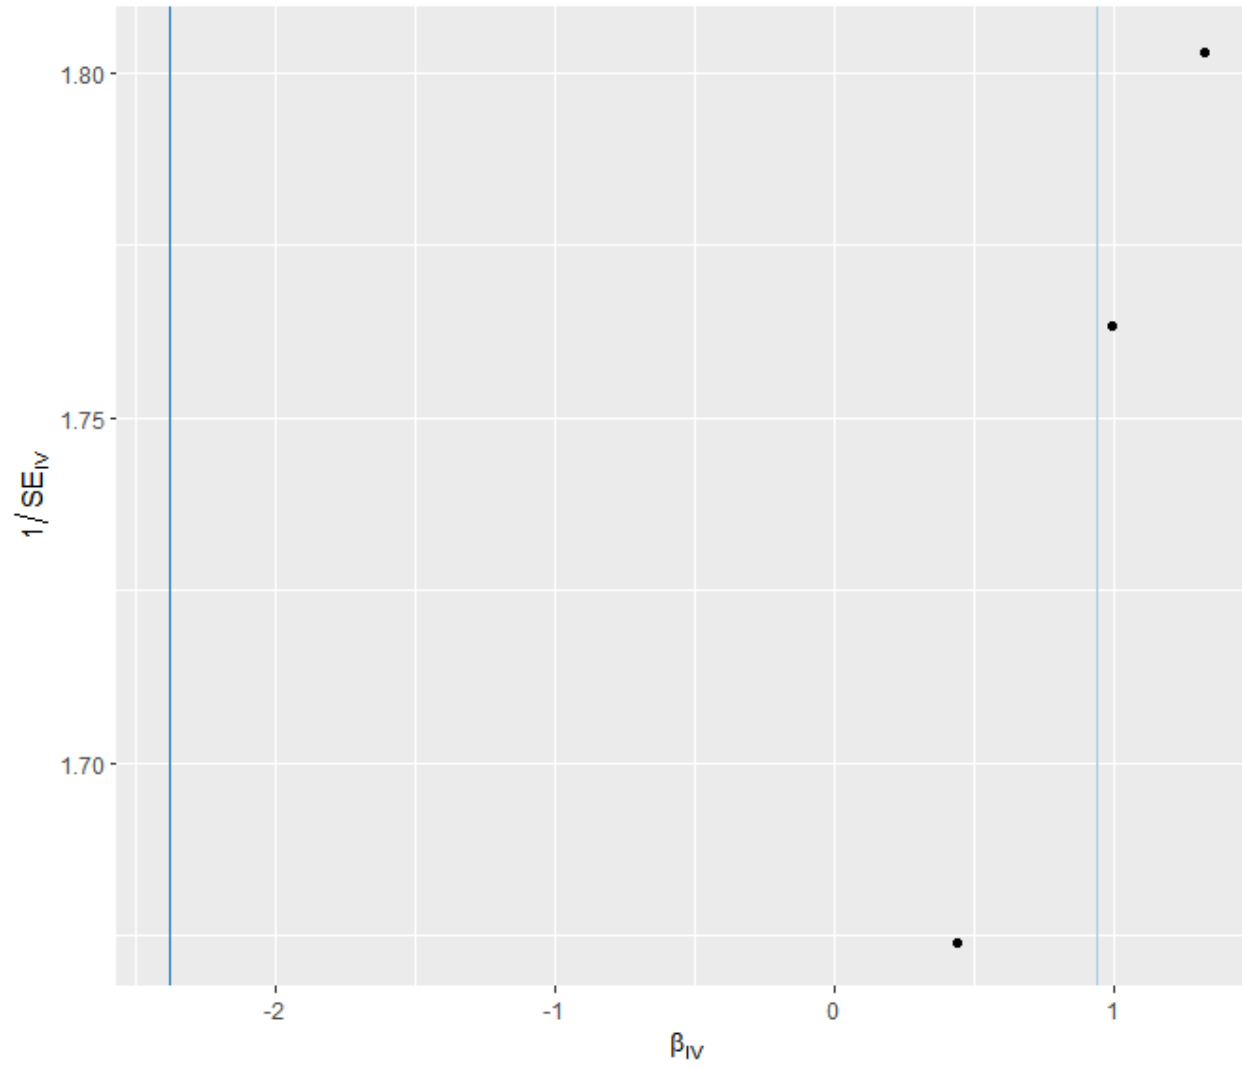

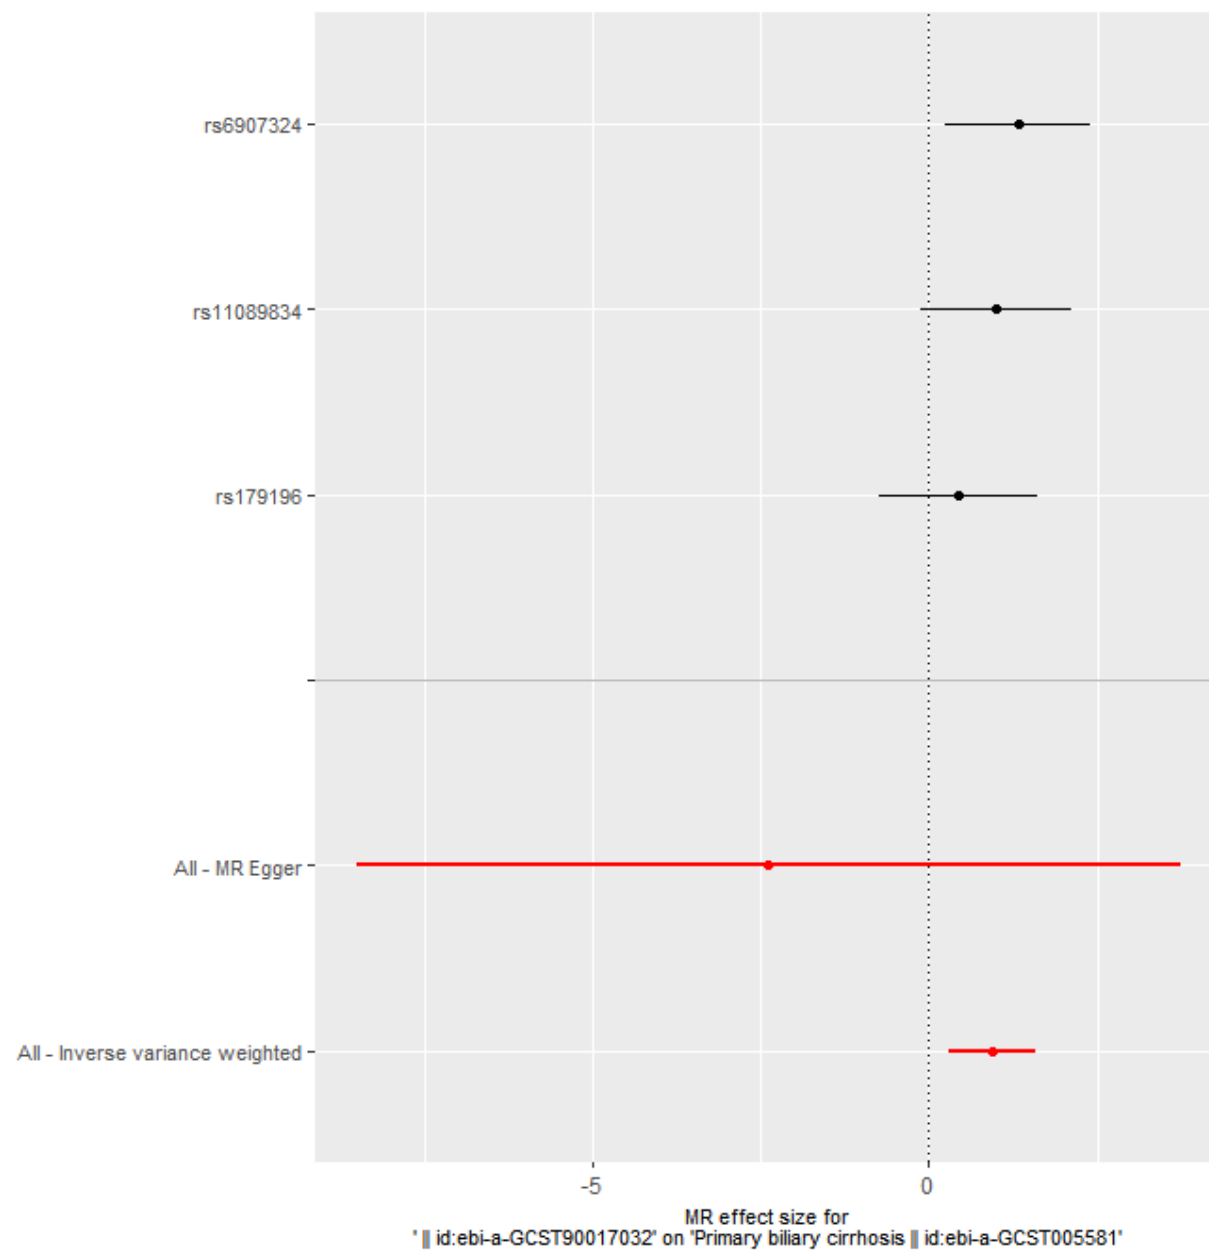

MR Test

- Inverse variance weighted
- MR Egger
- Simple mode
- Weighted median
- Weighted mode

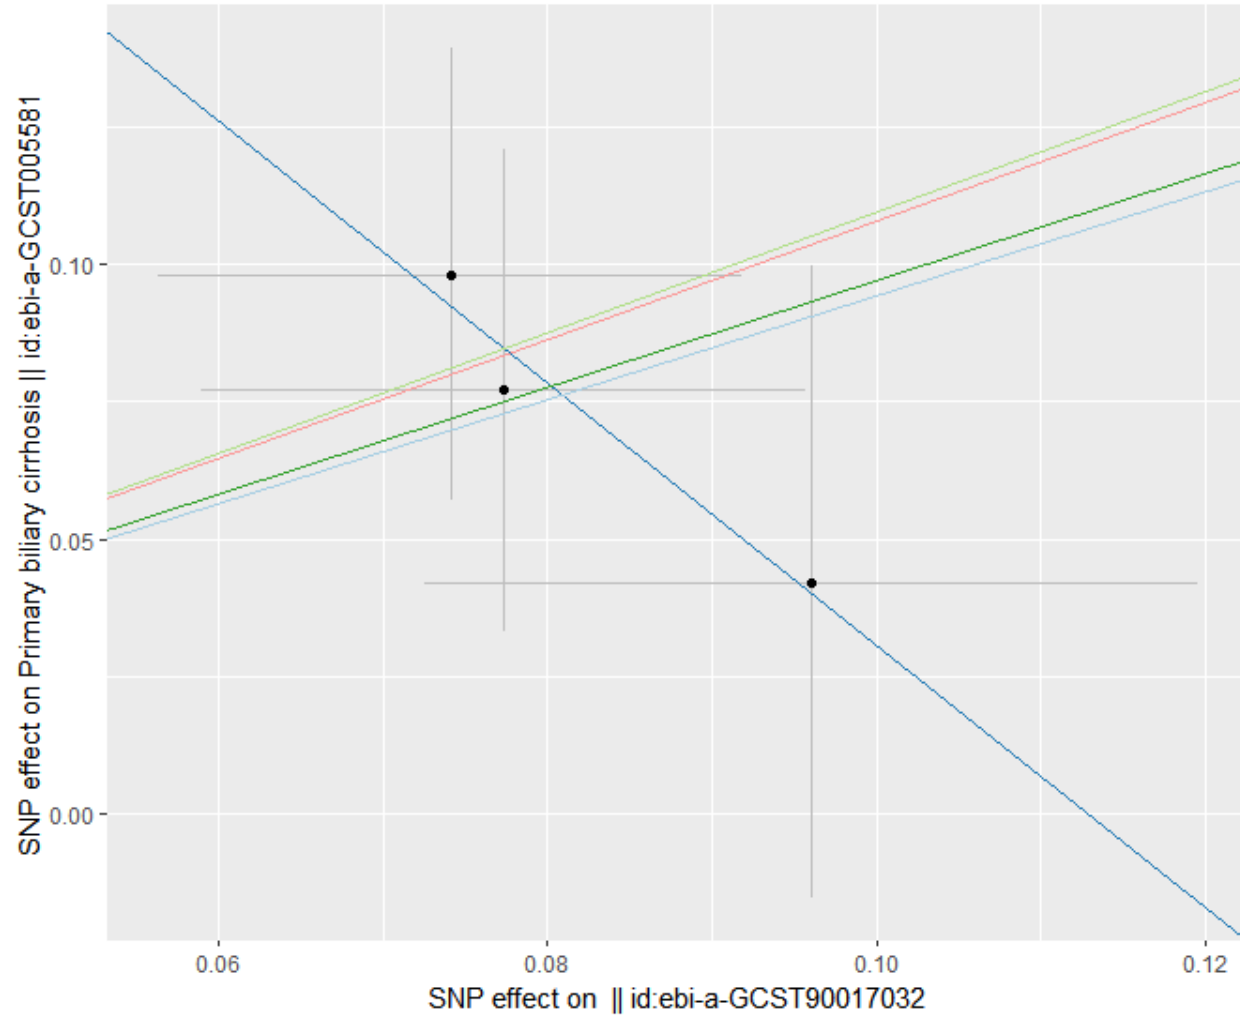

**Figure 176** Leave-one-out analysis, funnel plot, MR effect size and scatter plot for gut microbiota abundance (genus *Oscillibacter* id.2063) on primary biliary cirrhosis

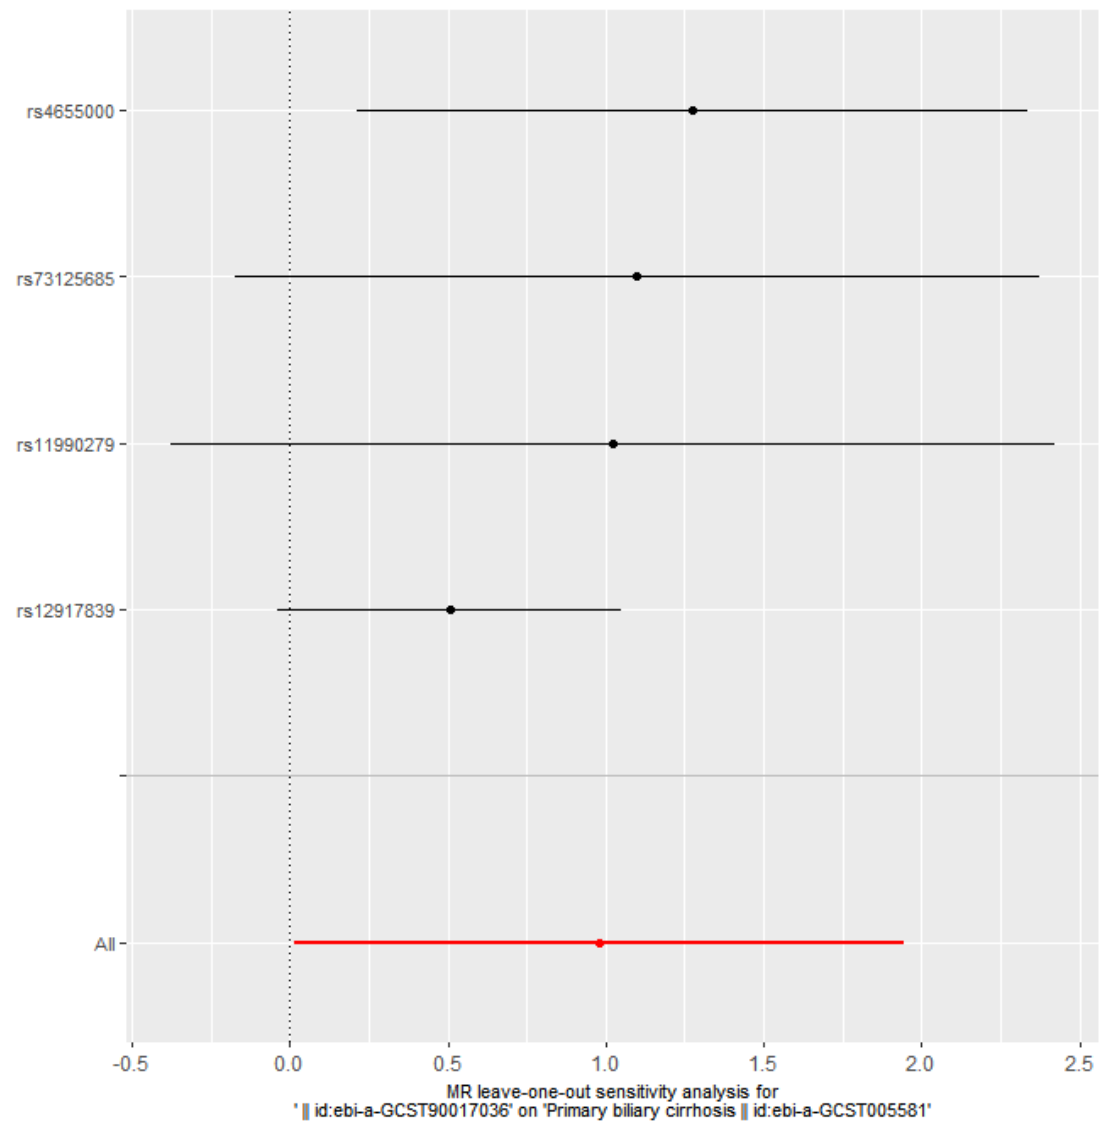

MR Method

- Inverse variance weighted
- MR Egger

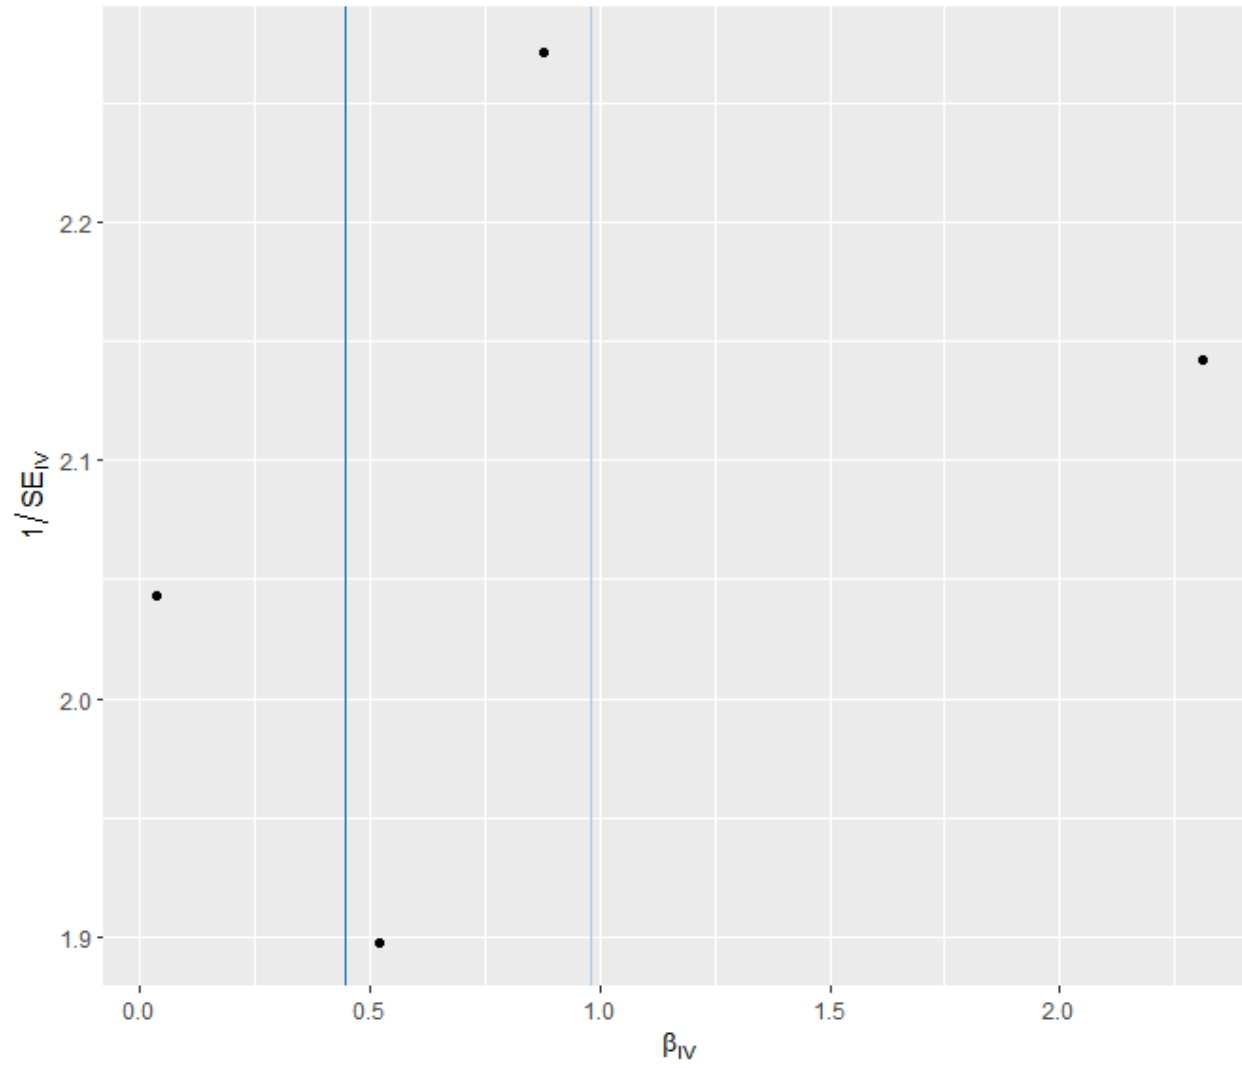

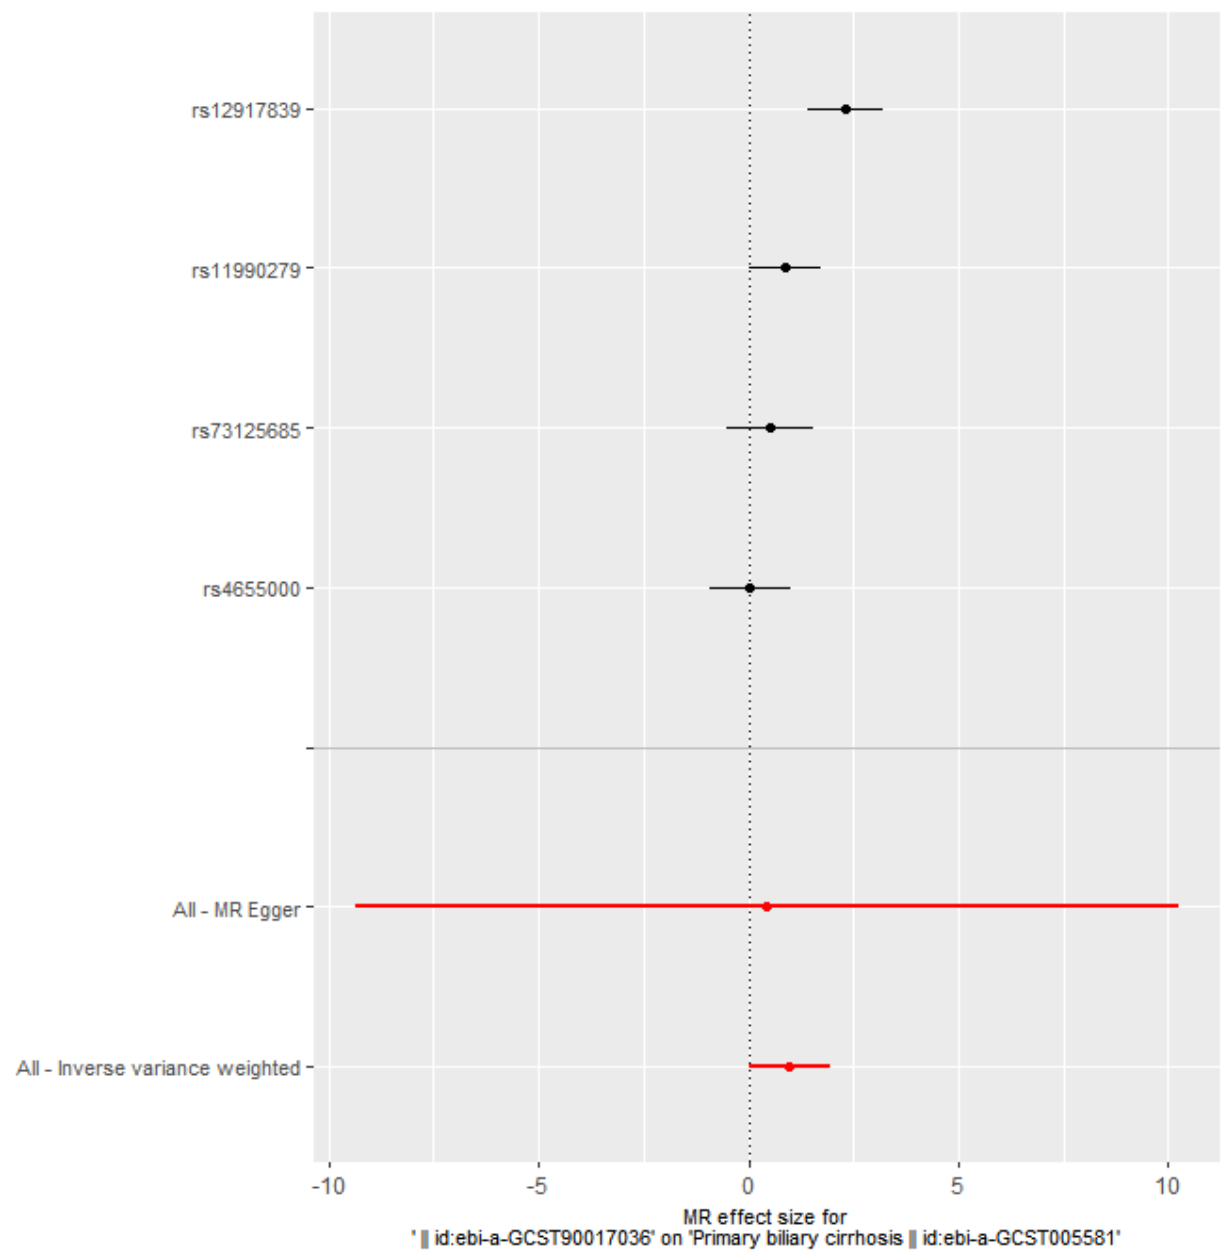

MR Test

- Inverse variance weighted
- MR Egger
- Simple mode
- Weighted median
- Weighted mode

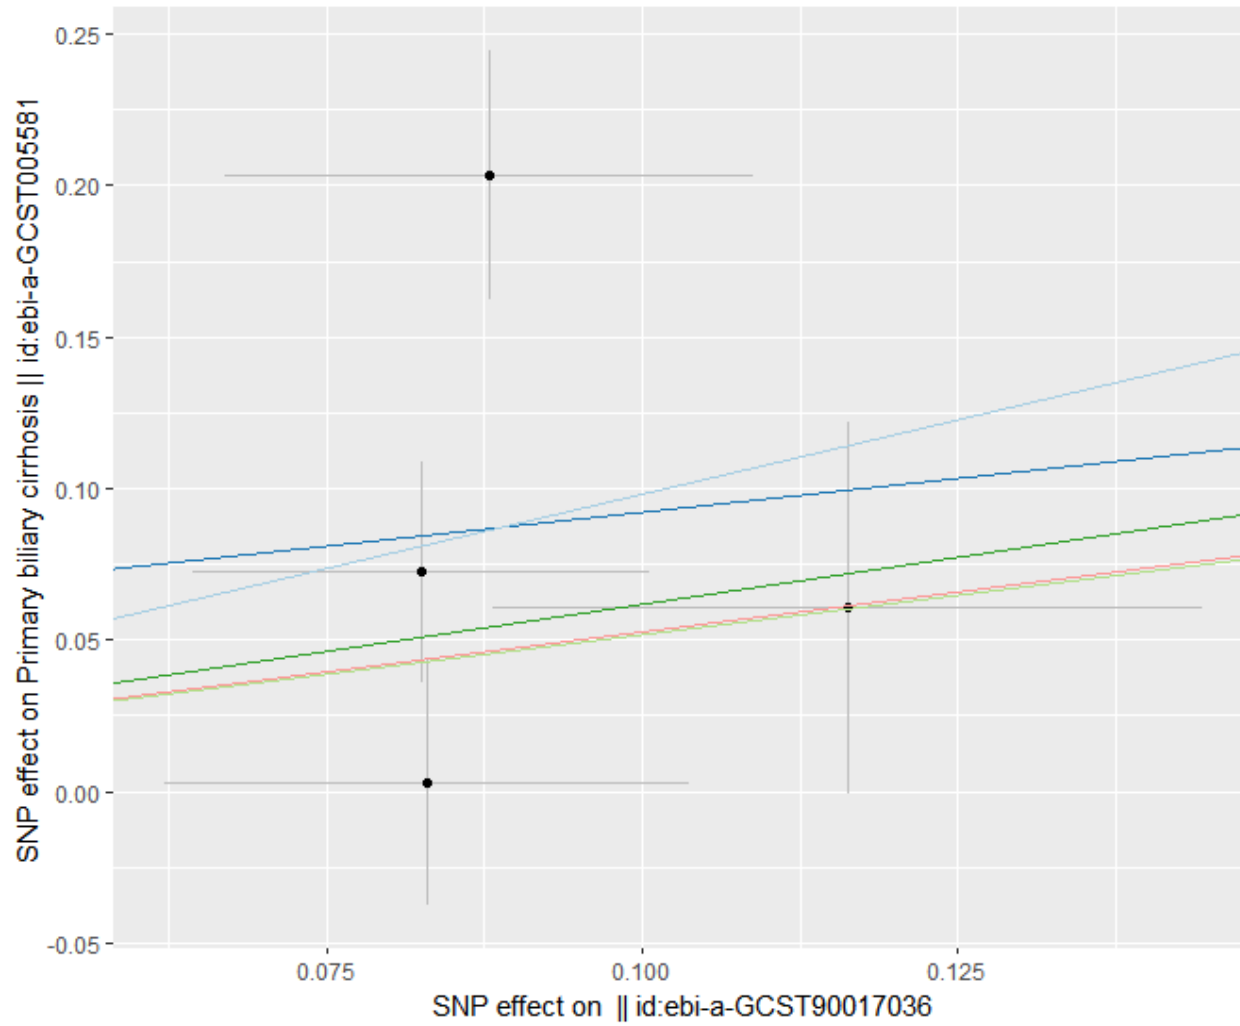



**Figure 177** Leave-one-out analysis, funnel plot, MR effect size and scatter plot for gut microbiota abundance (genus Ruminococcaceae UCG010 id.11367) on primary biliary cirrhosis

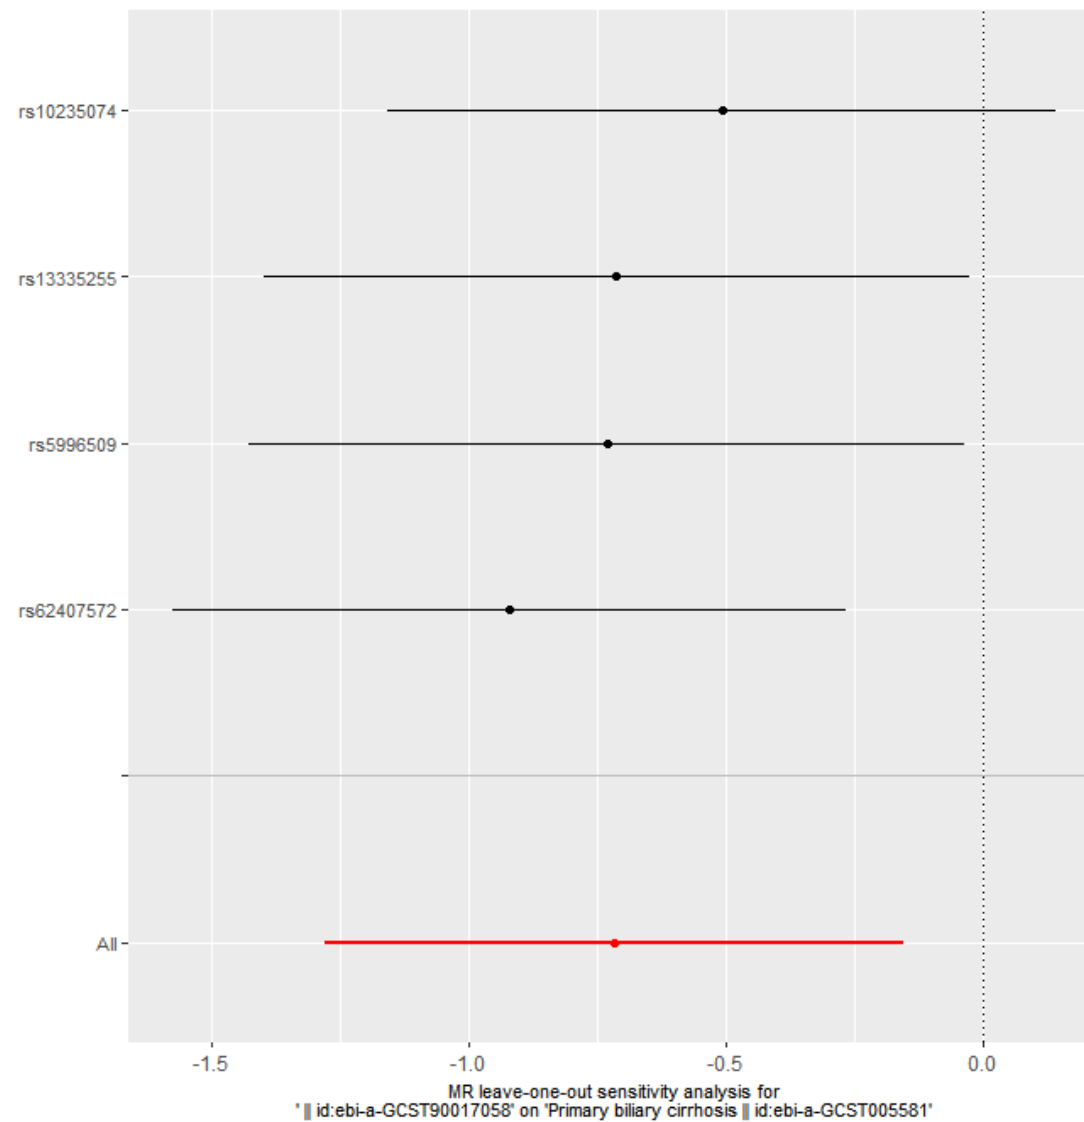

MR Method

- Inverse variance weighted
- MR Egger

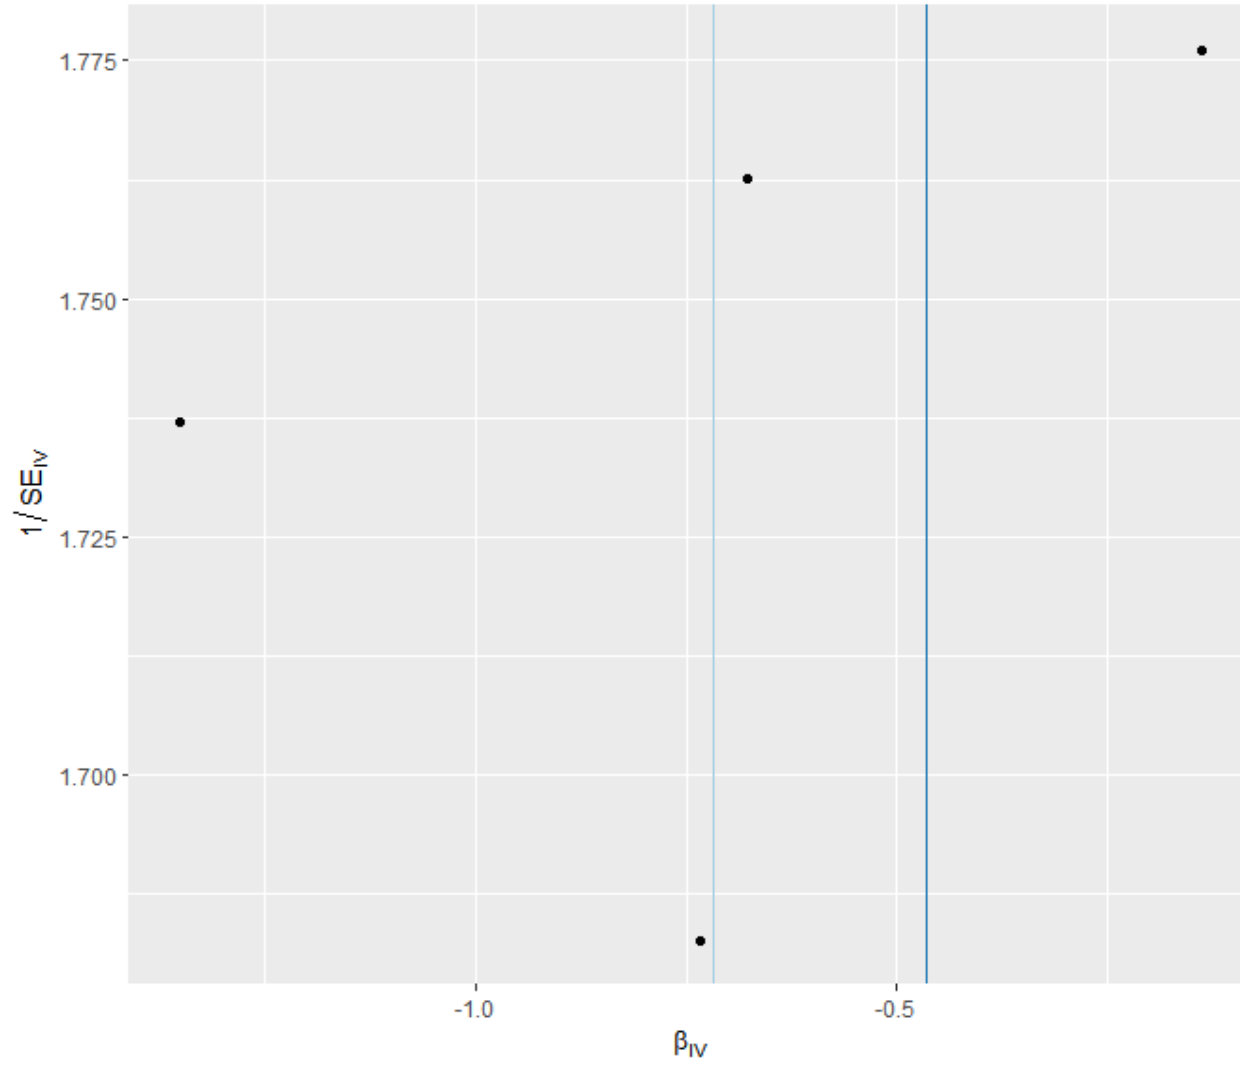

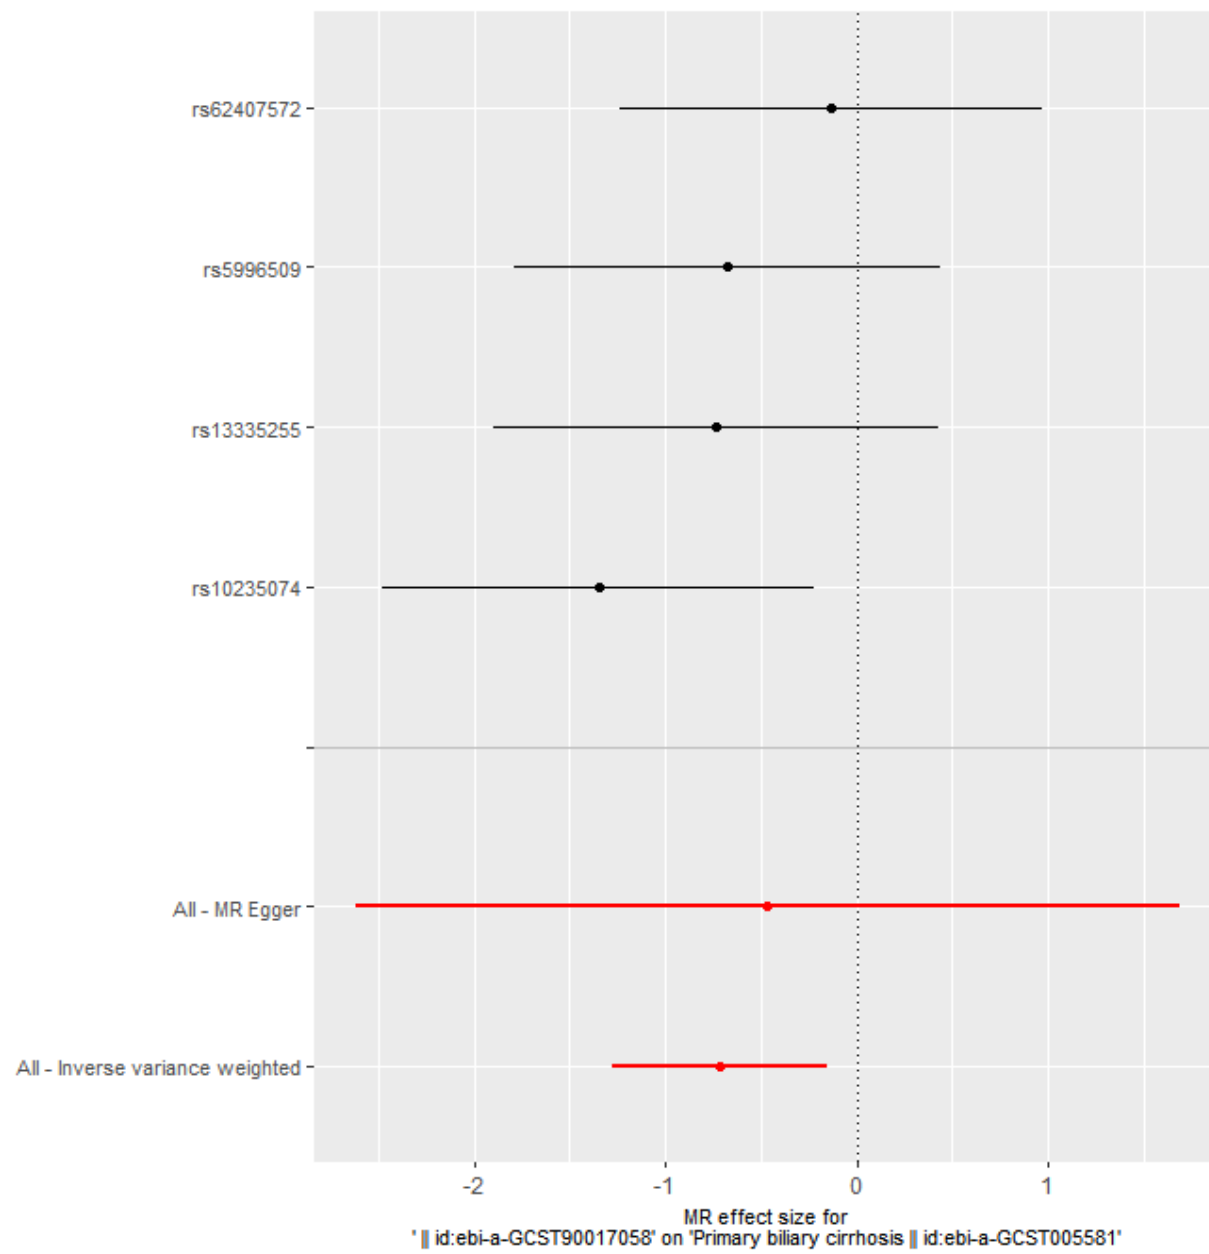

MR Test

- Inverse variance weighted
- MR Egger
- Simple mode
- Weighted median
- Weighted mode

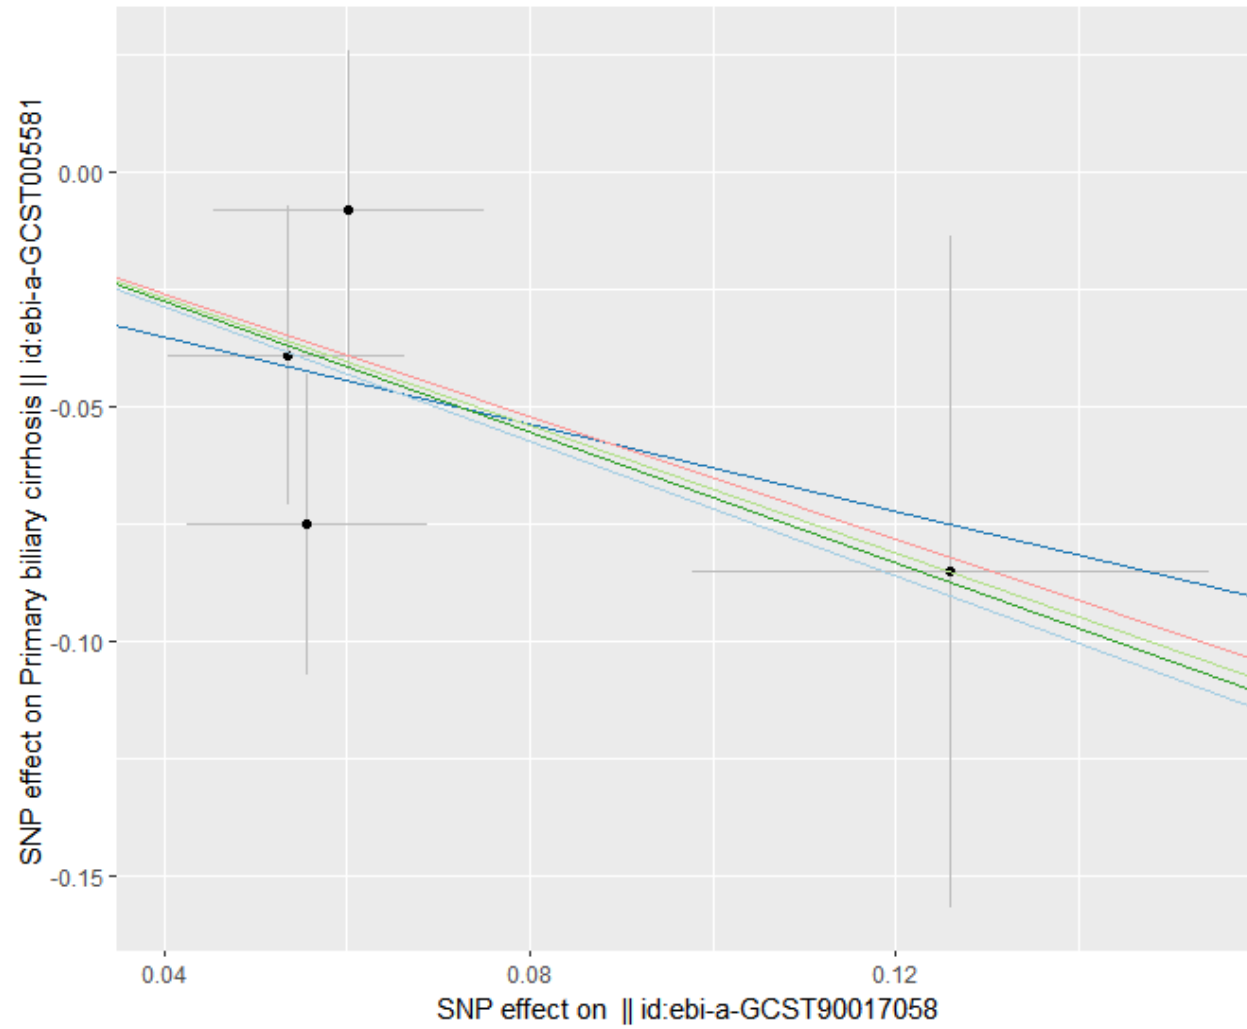

**Figure 178** Leave-one-out analysis, funnel plot, MR effect size and scatter plot for gut microbiota abundance (unknown genus id.826) on primary biliary cirrhosis

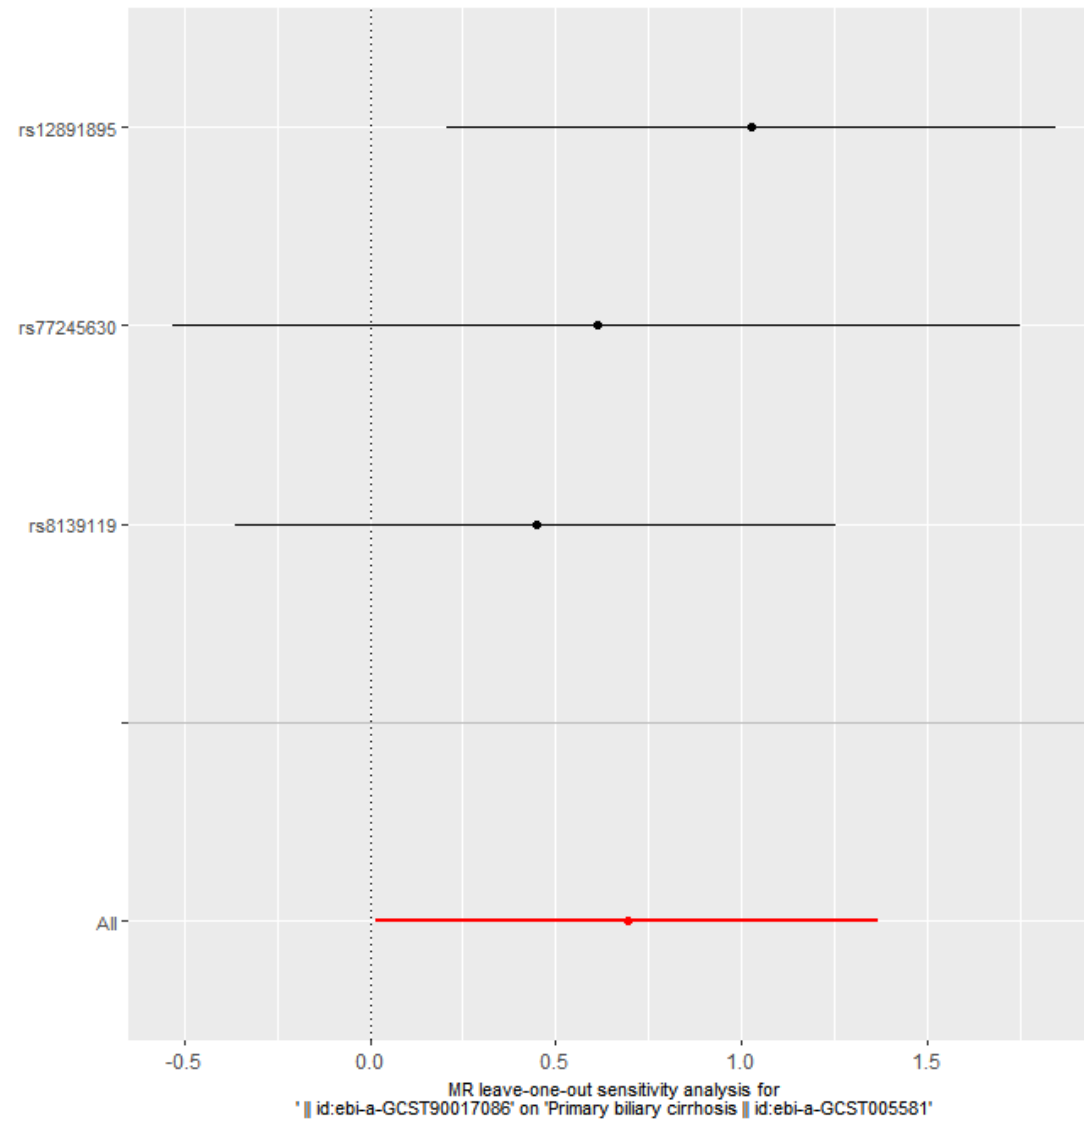

MR Method

- Inverse variance weighted
- MR Egger

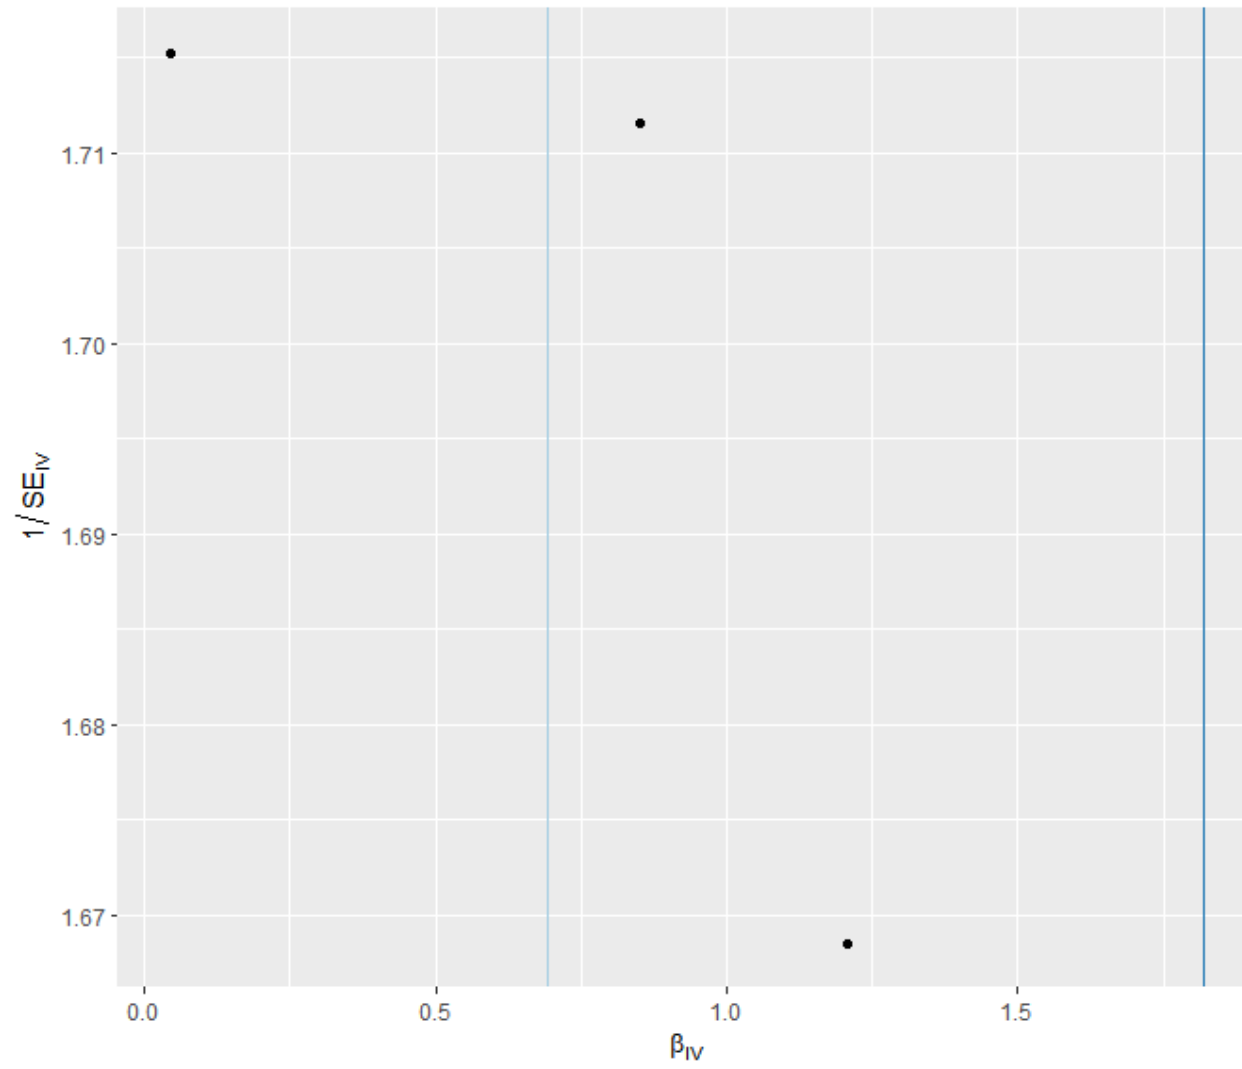

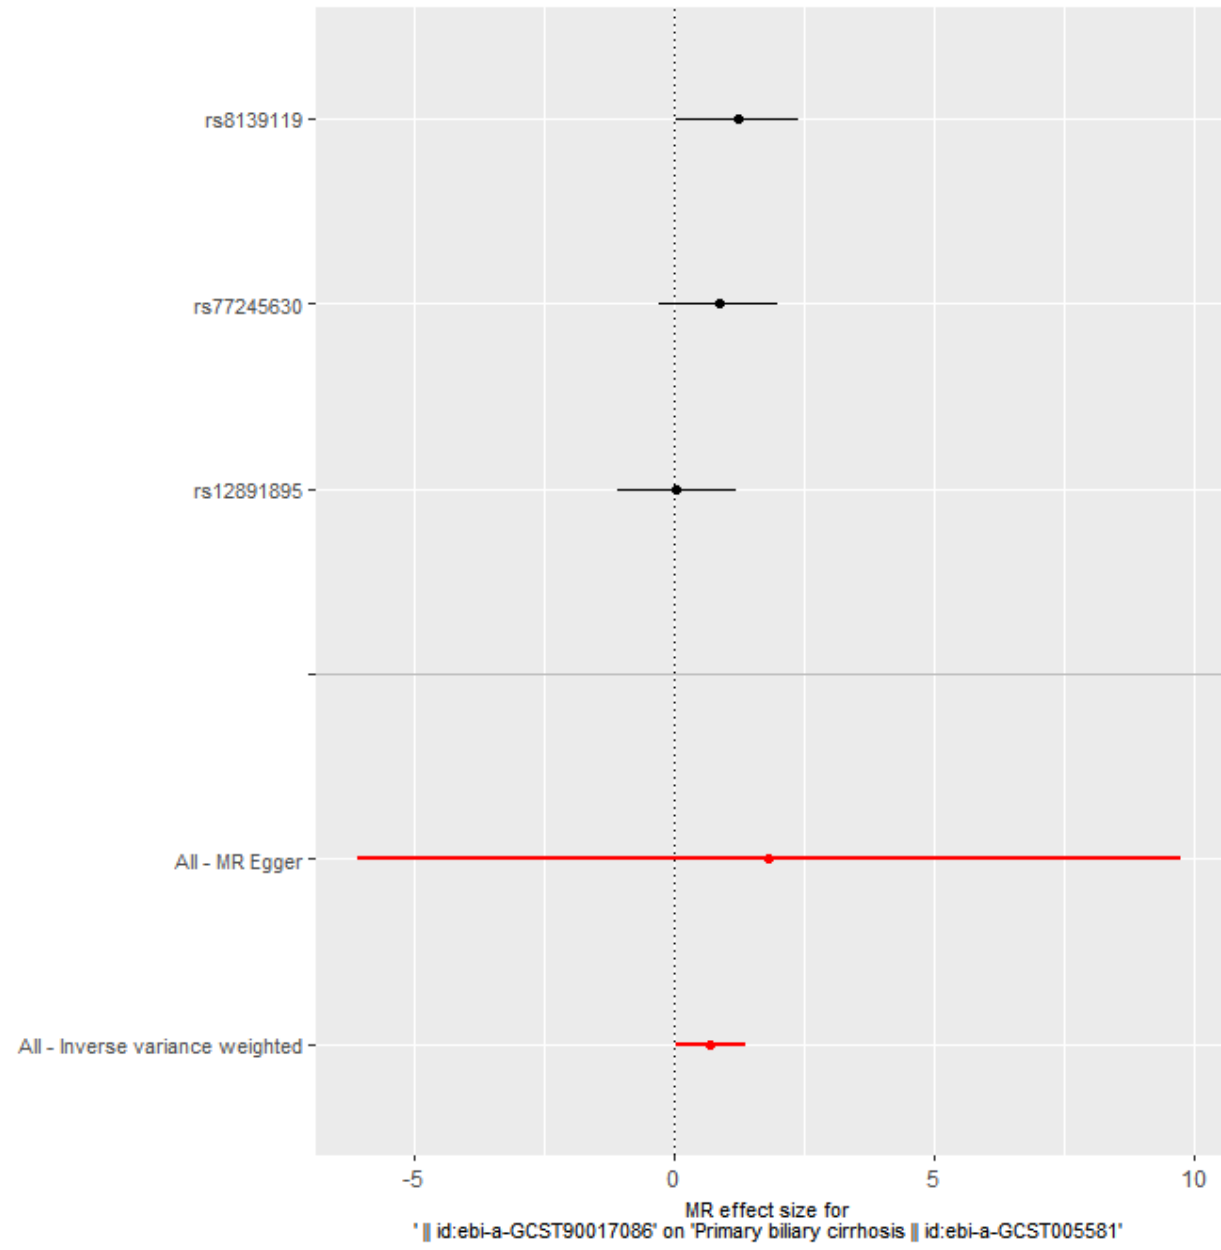

MR Test

- Inverse variance weighted
- MR Egger
- Simple mode
- Weighted median
- Weighted mode

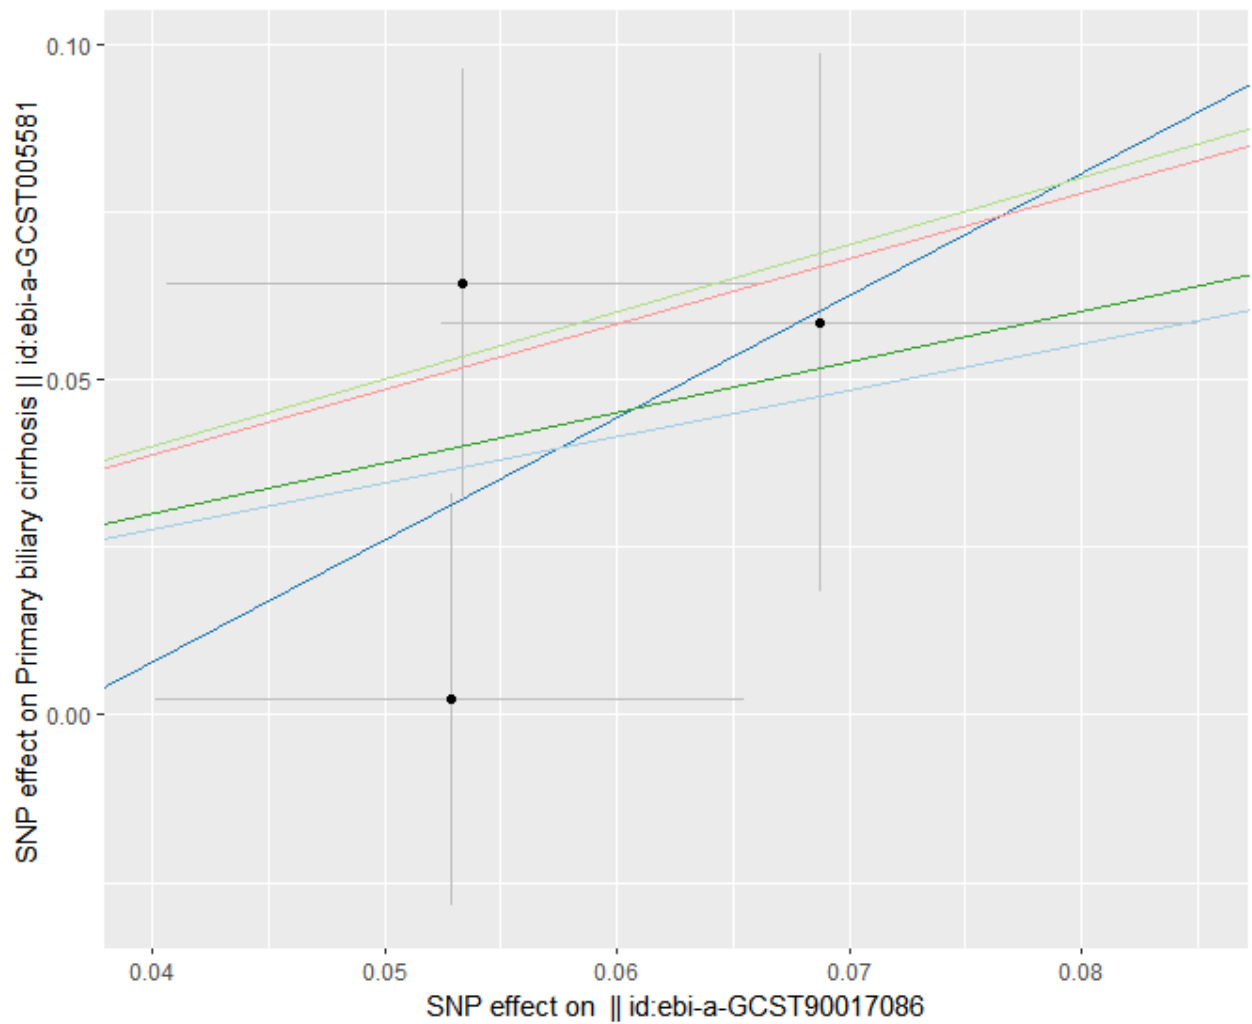



**Figure 179** Leave-one-out analysis, funnel plot, MR effect size and scatter plot for gut microbiota abundance (family Alcaligenaceae id.2875) on liver cell carcinoma

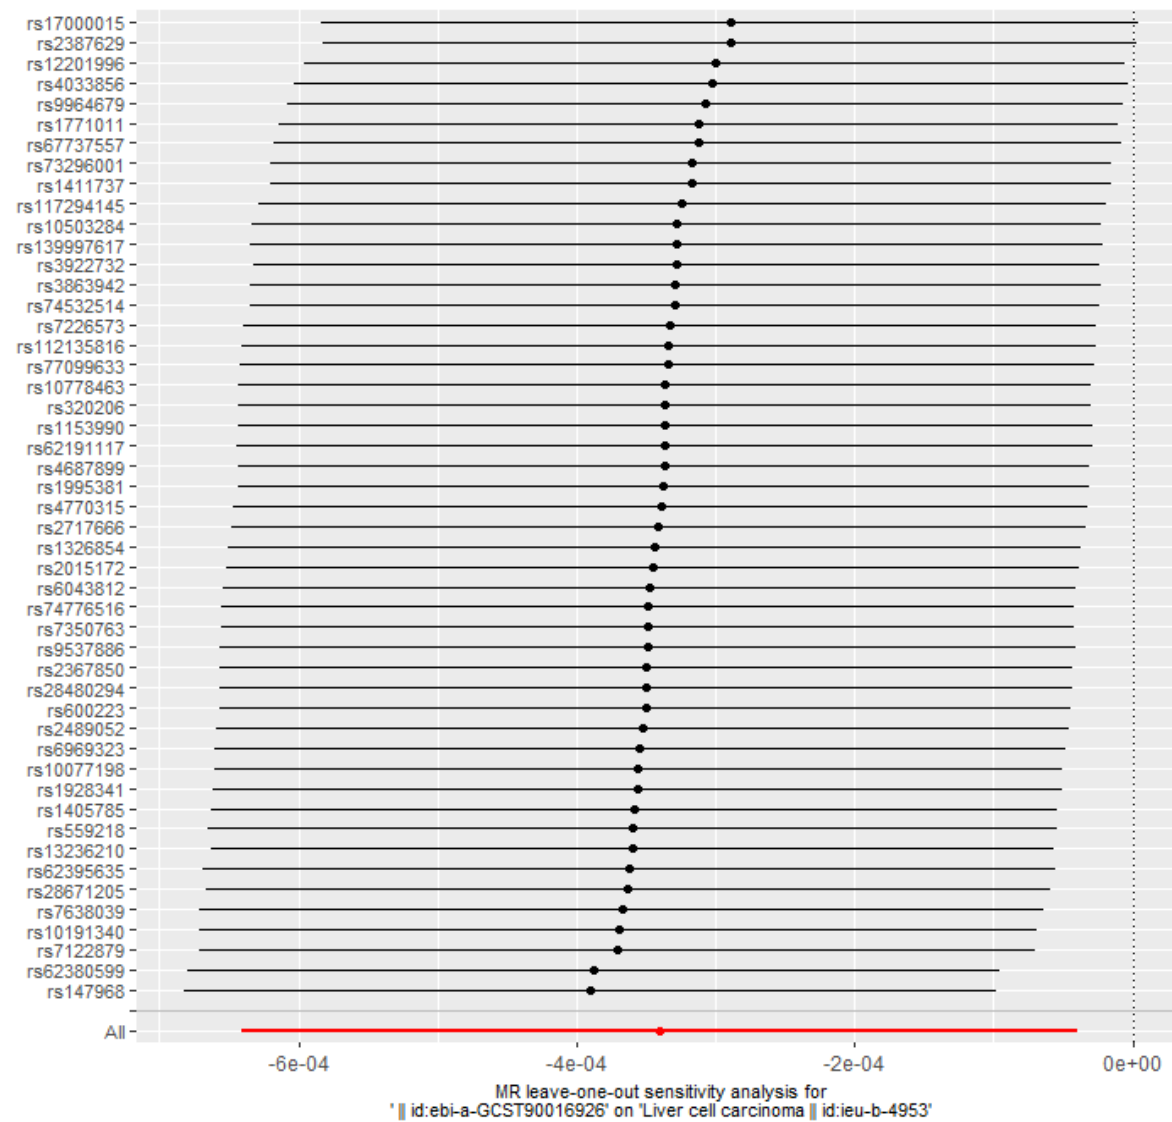

MR Method

- Inverse variance weighted
- MR Egger

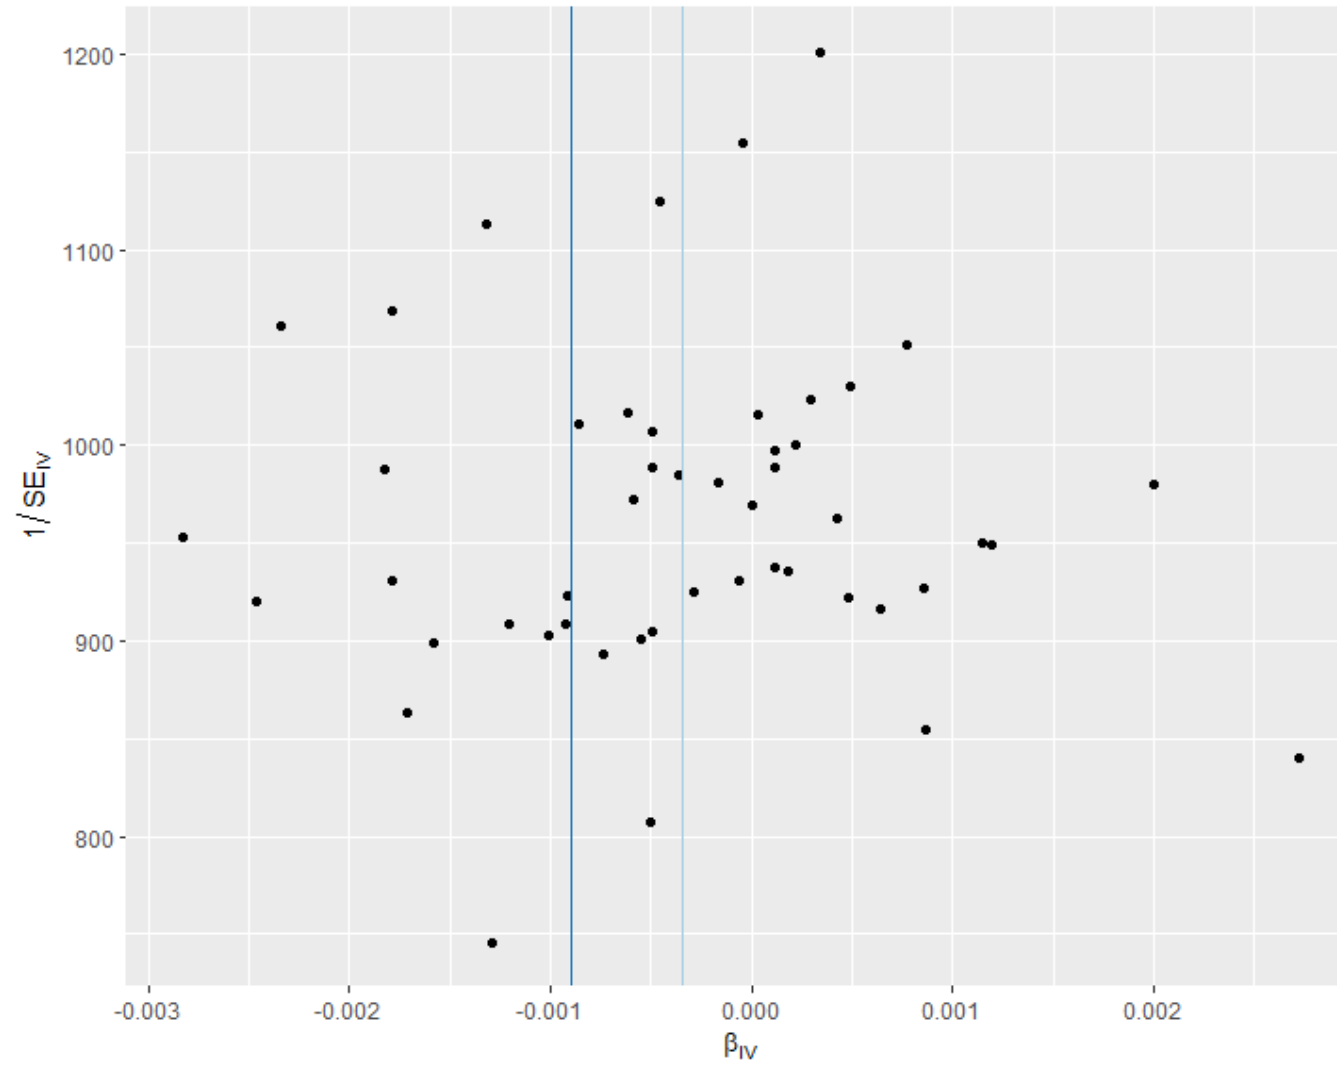

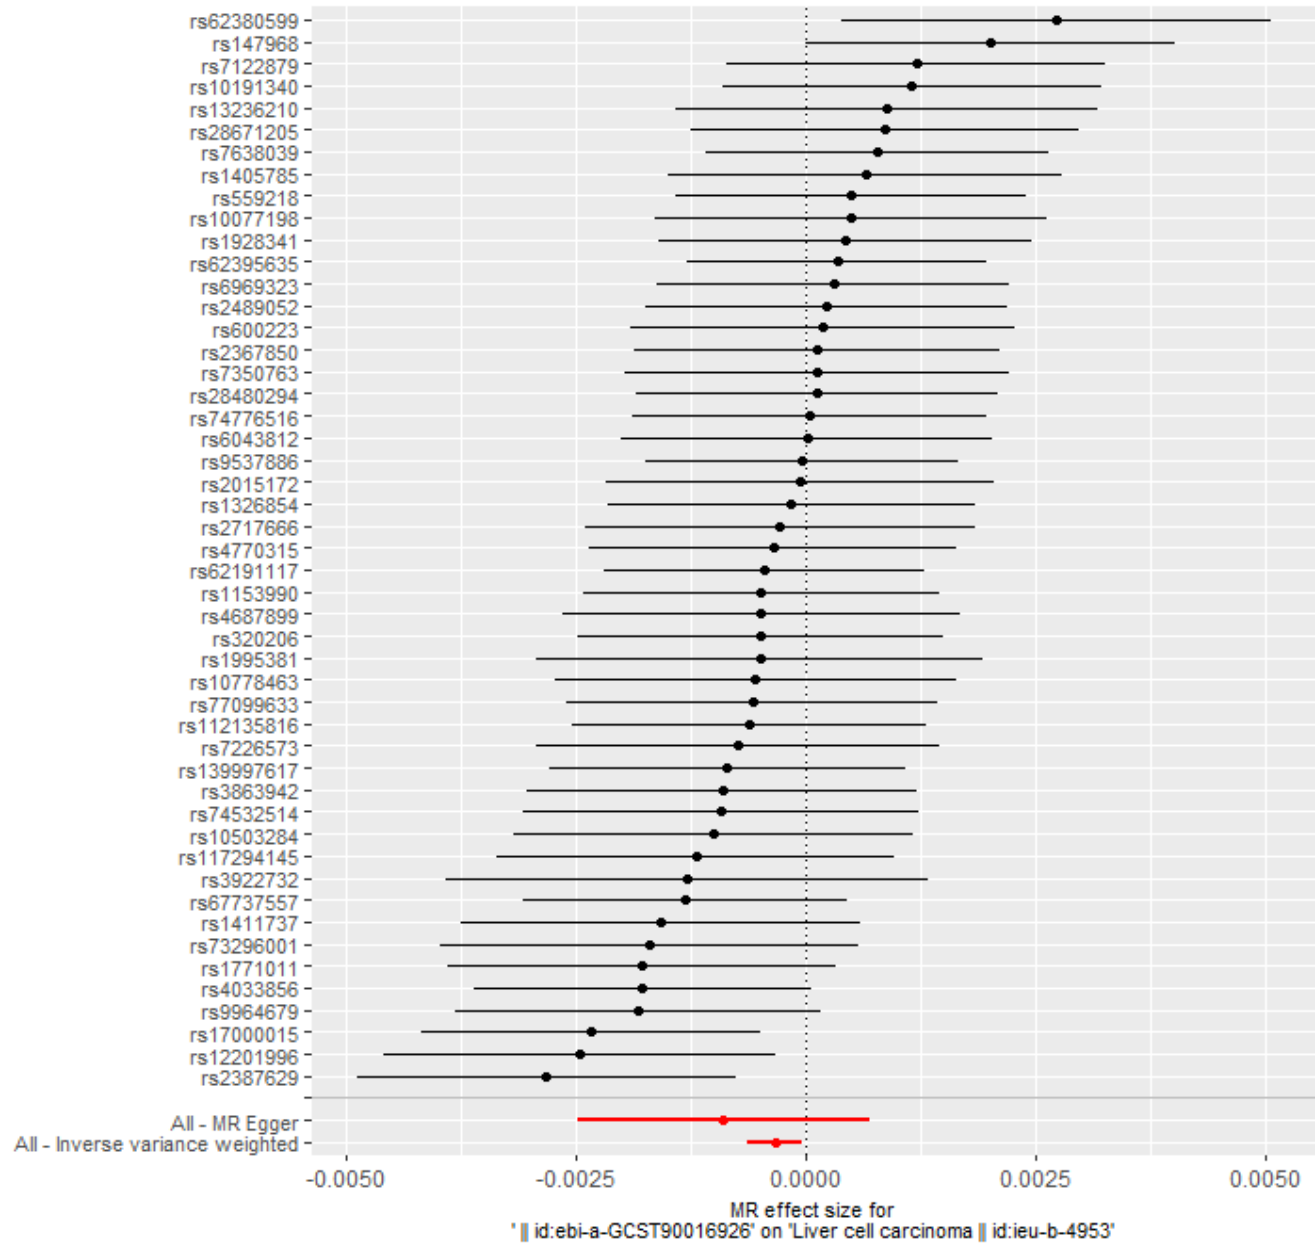

MR Test

- Inverse variance weighted
- MR Egger
- Simple mode
- Weighted median
- Weighted mode

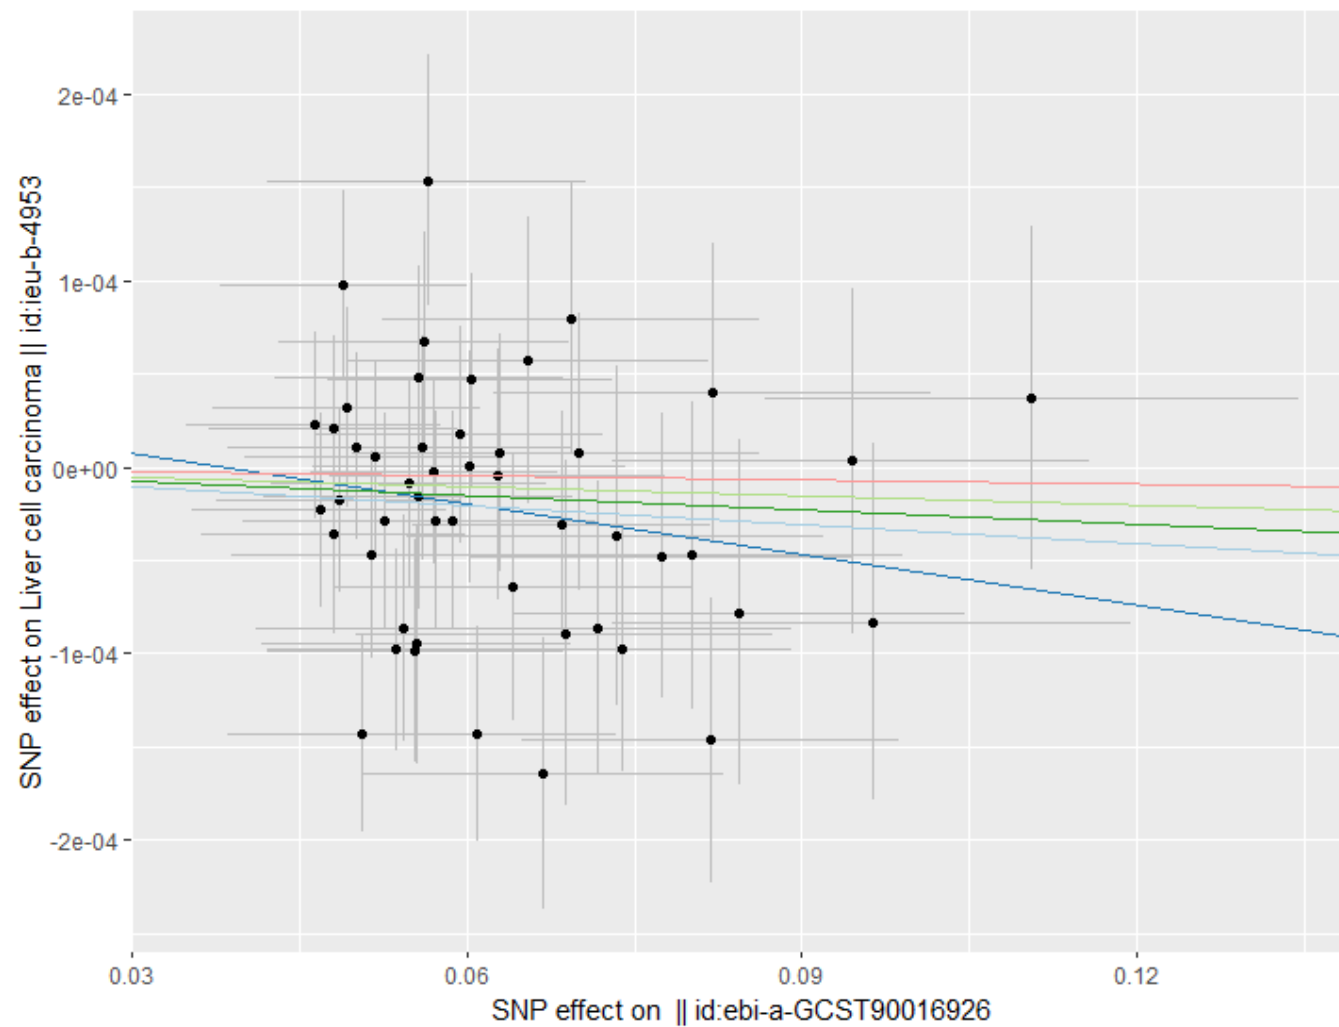

**Figure 180** Leave-one-out analysis, funnel plot, MR effect size and scatter plot for gut microbiota abundance (genus Actinomyces id.423) on liver cell carcinoma

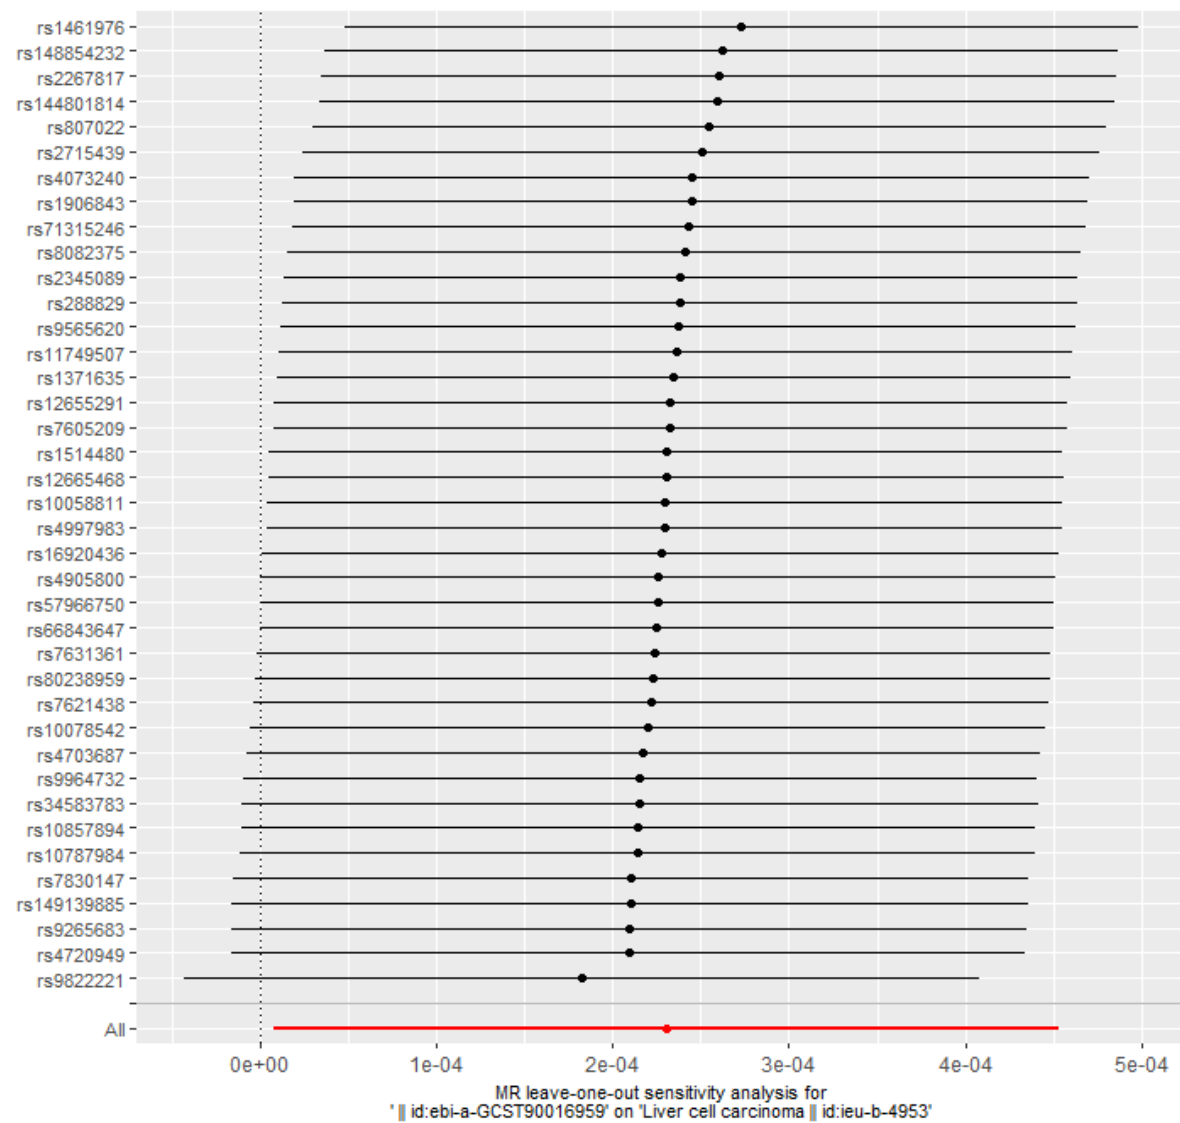

MR Method

- Inverse variance weighted
- MR Egger

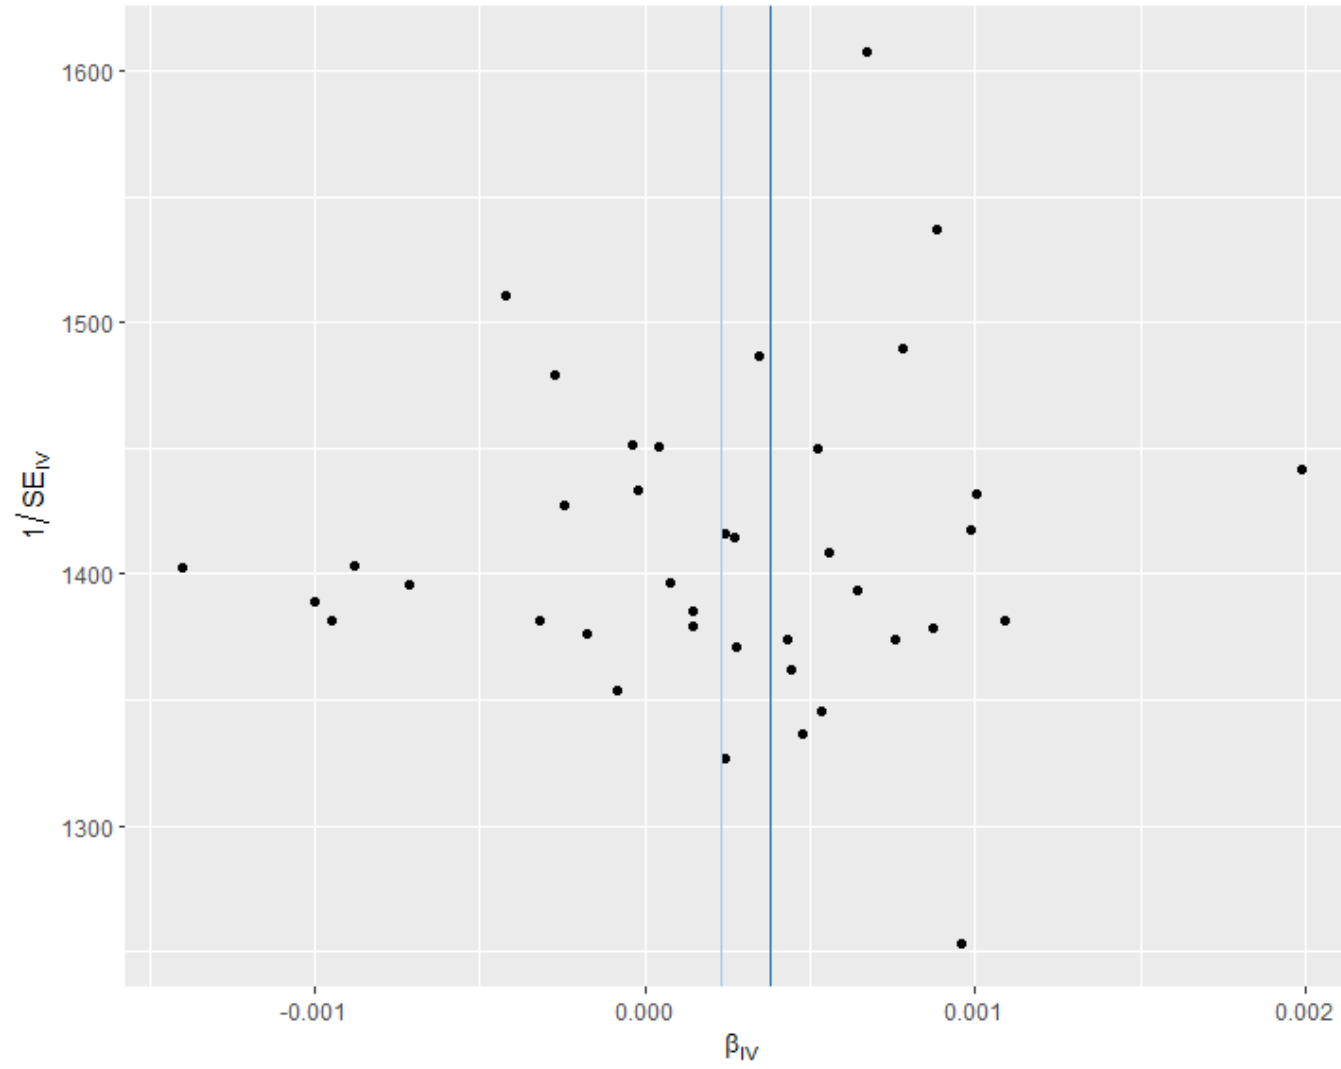

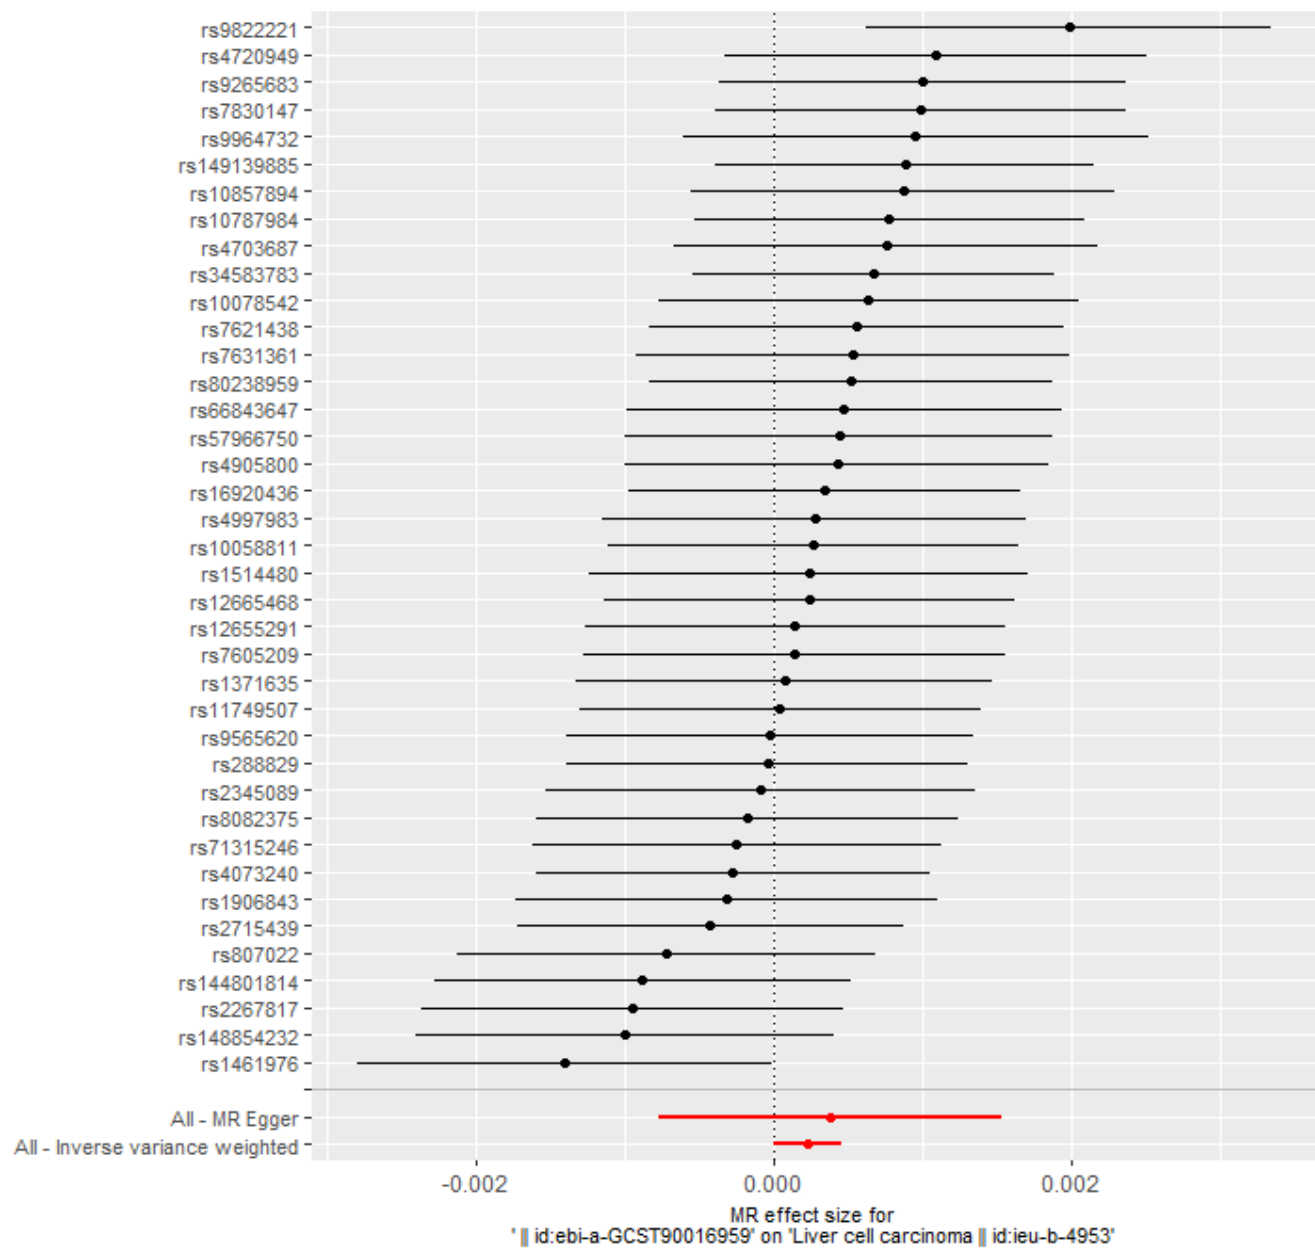

MR Test

- Inverse variance weighted
- MR Egger
- Simple mode
- Weighted median
- Weighted mode

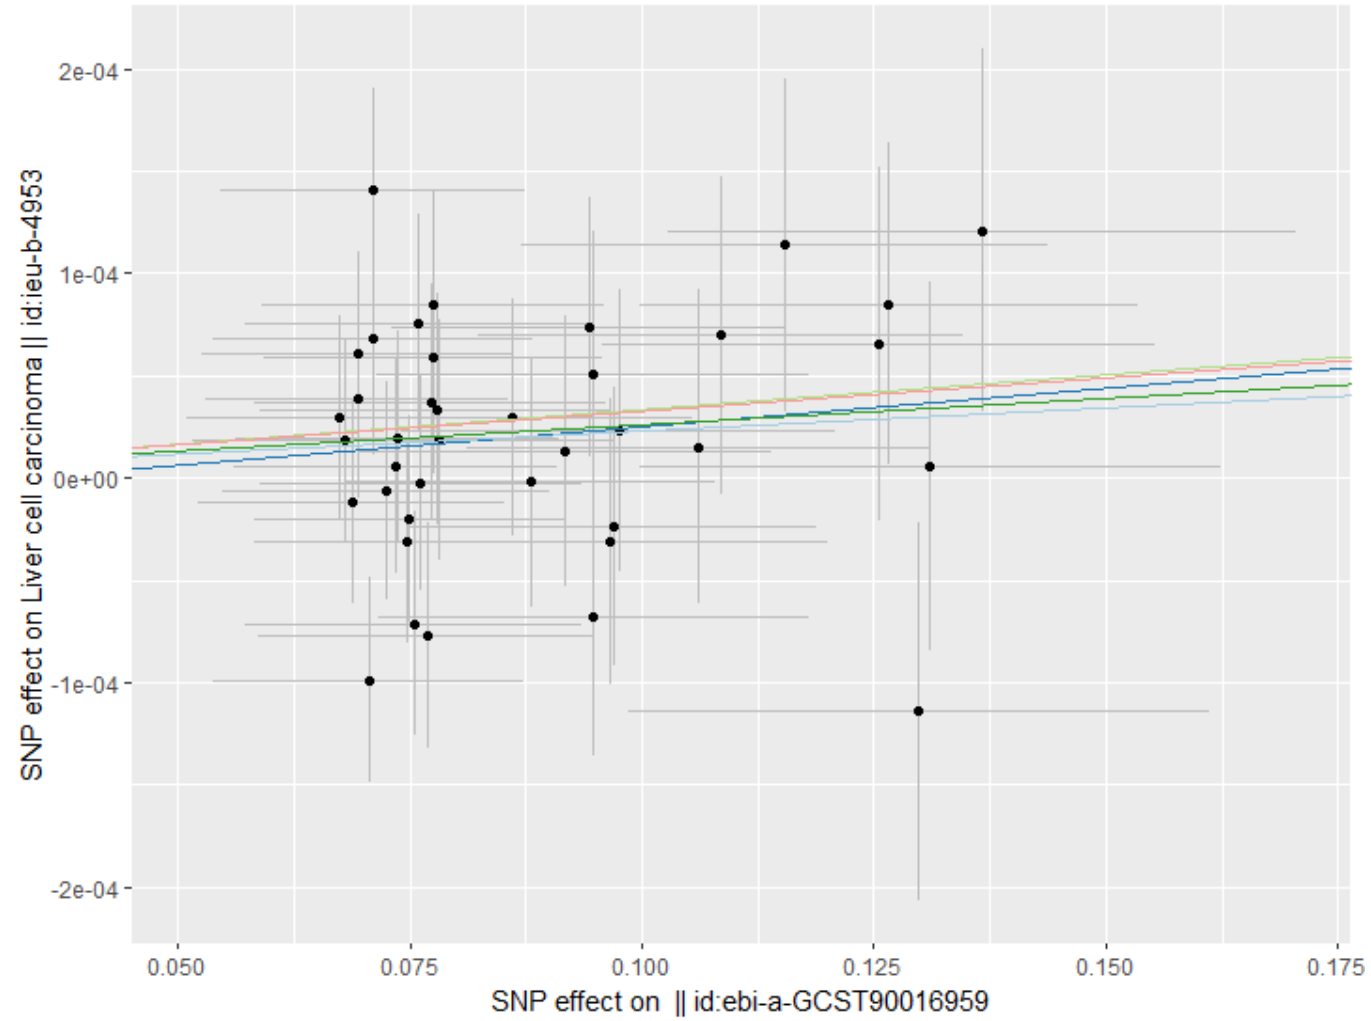



**Figure 181** Leave-one-out analysis, funnel plot, MR effect size and scatter plot for gut microbiota abundance (genus *Butyricicoccus* id.2055) on liver cell carcinoma

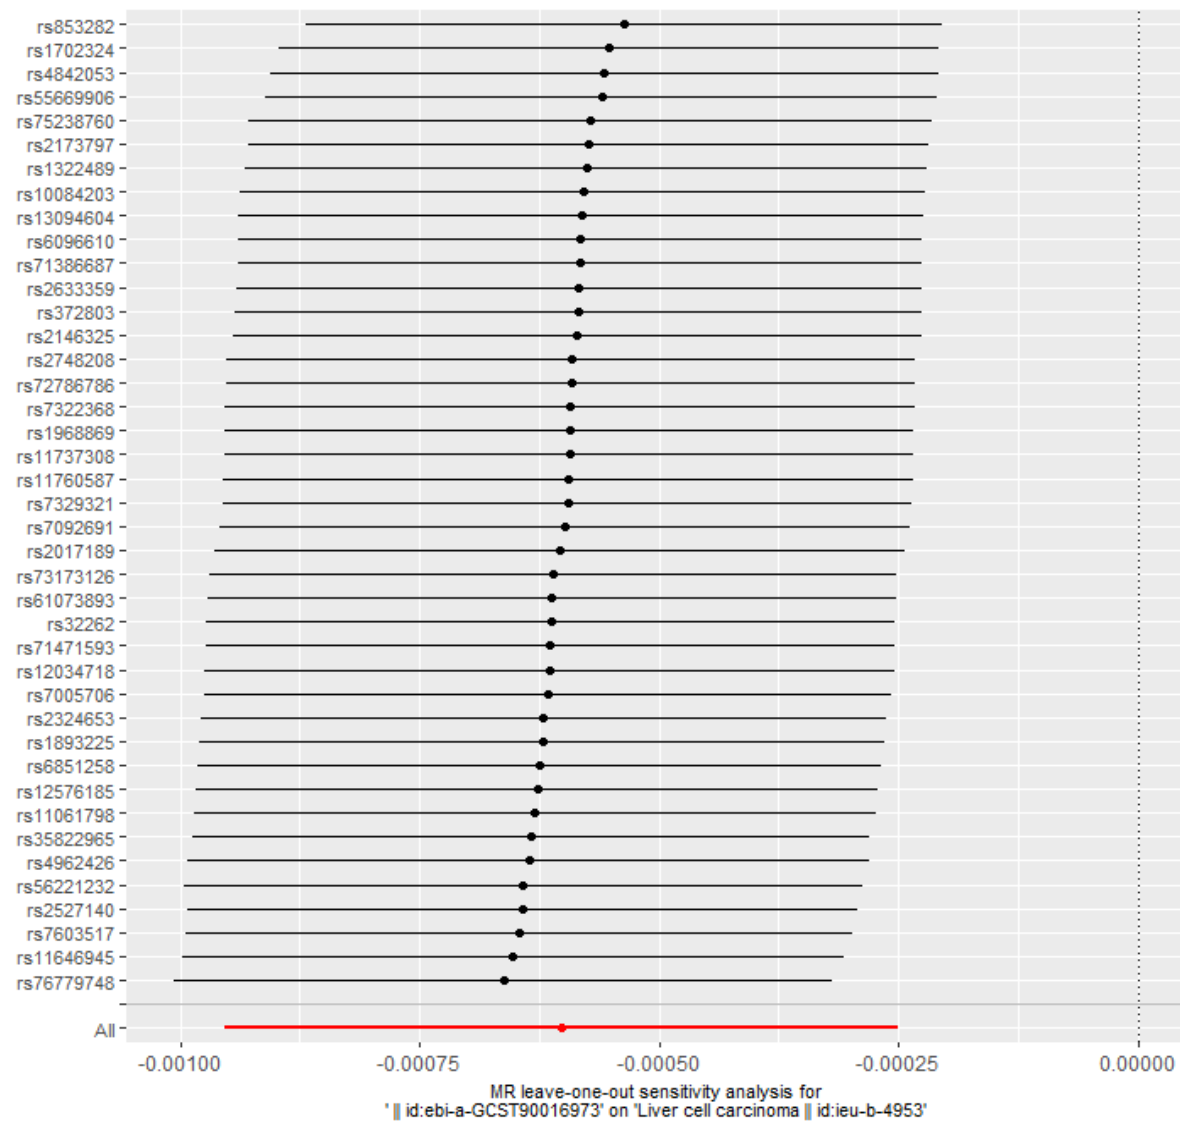

MR Method

- Inverse variance weighted
- MR Egger

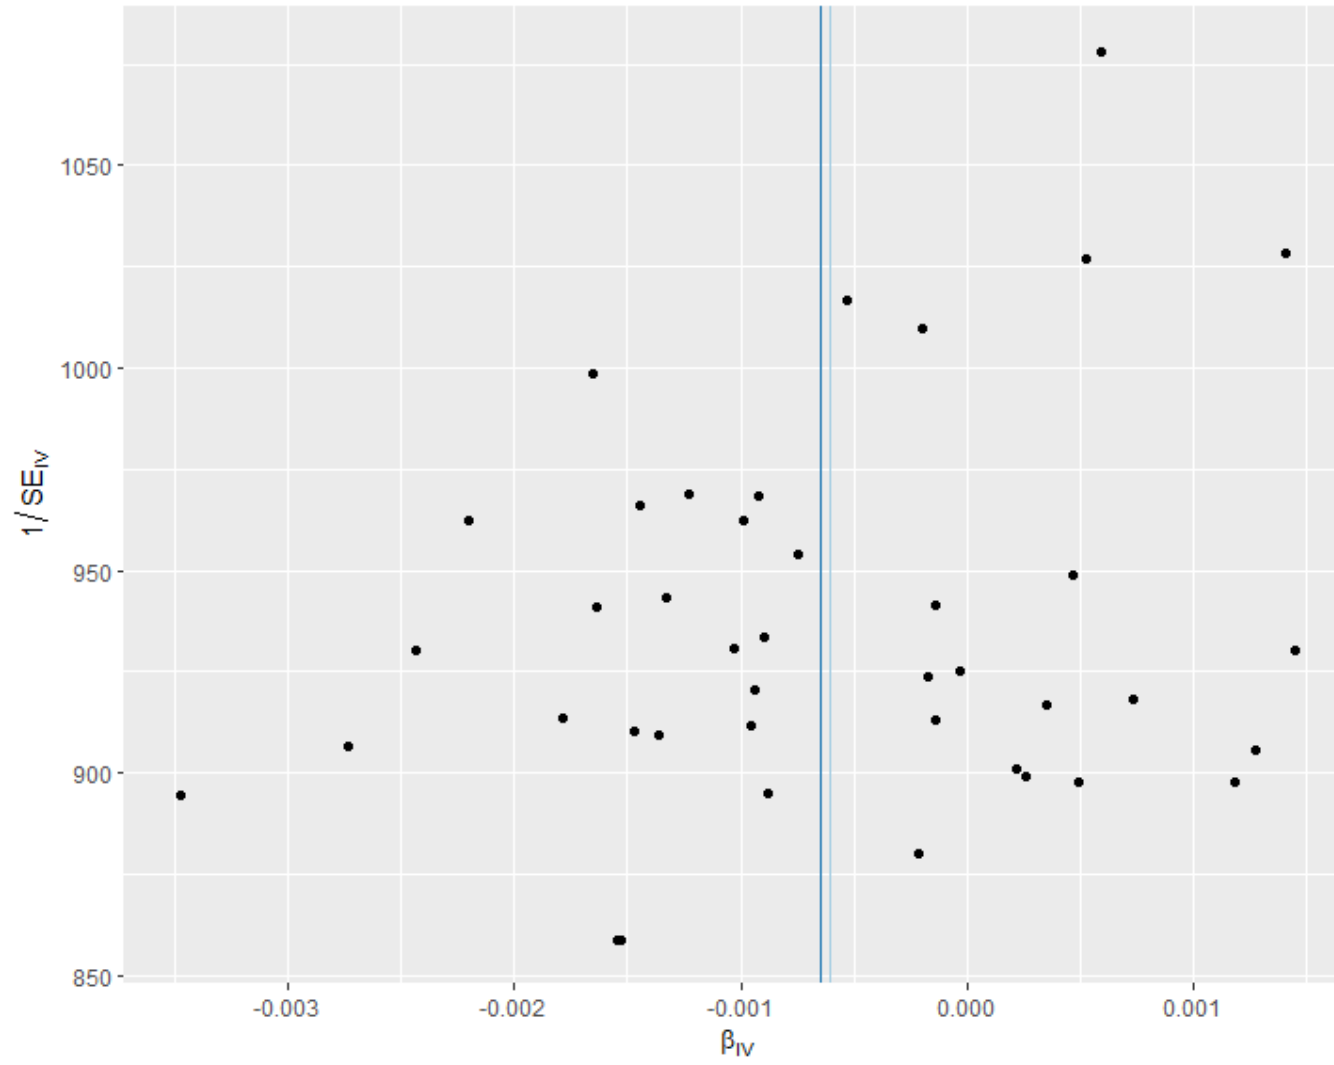

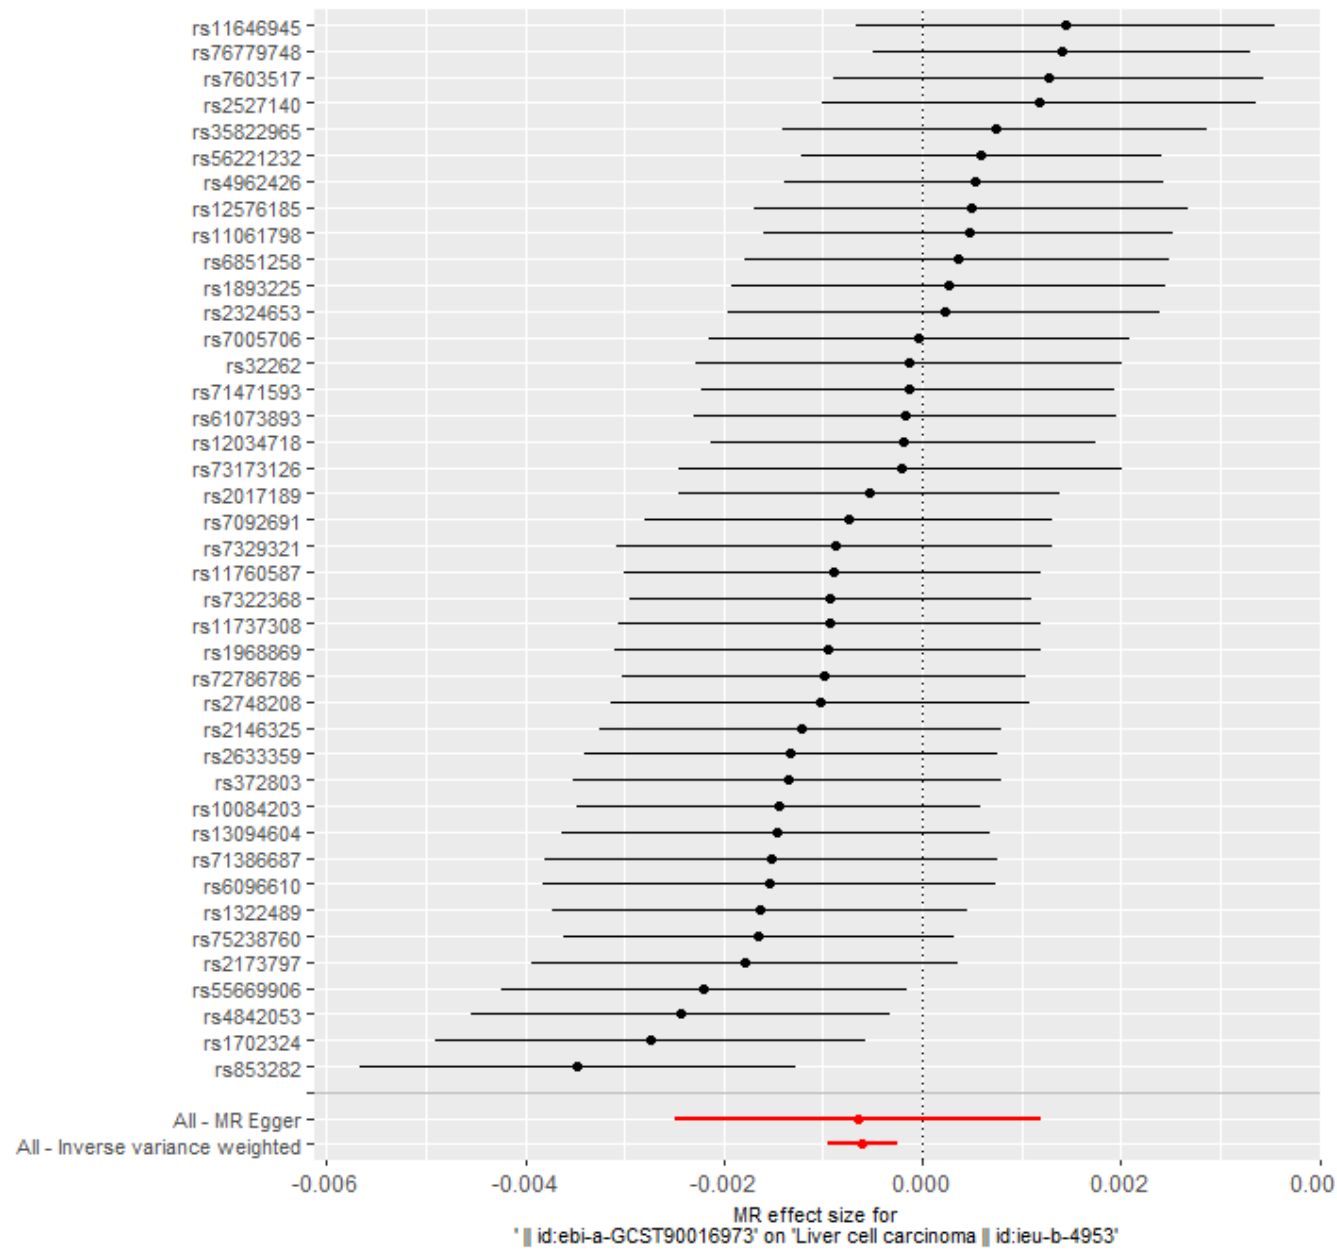

MR Test

- Inverse variance weighted
- MR Egger
- Simple mode
- Weighted median
- Weighted mode

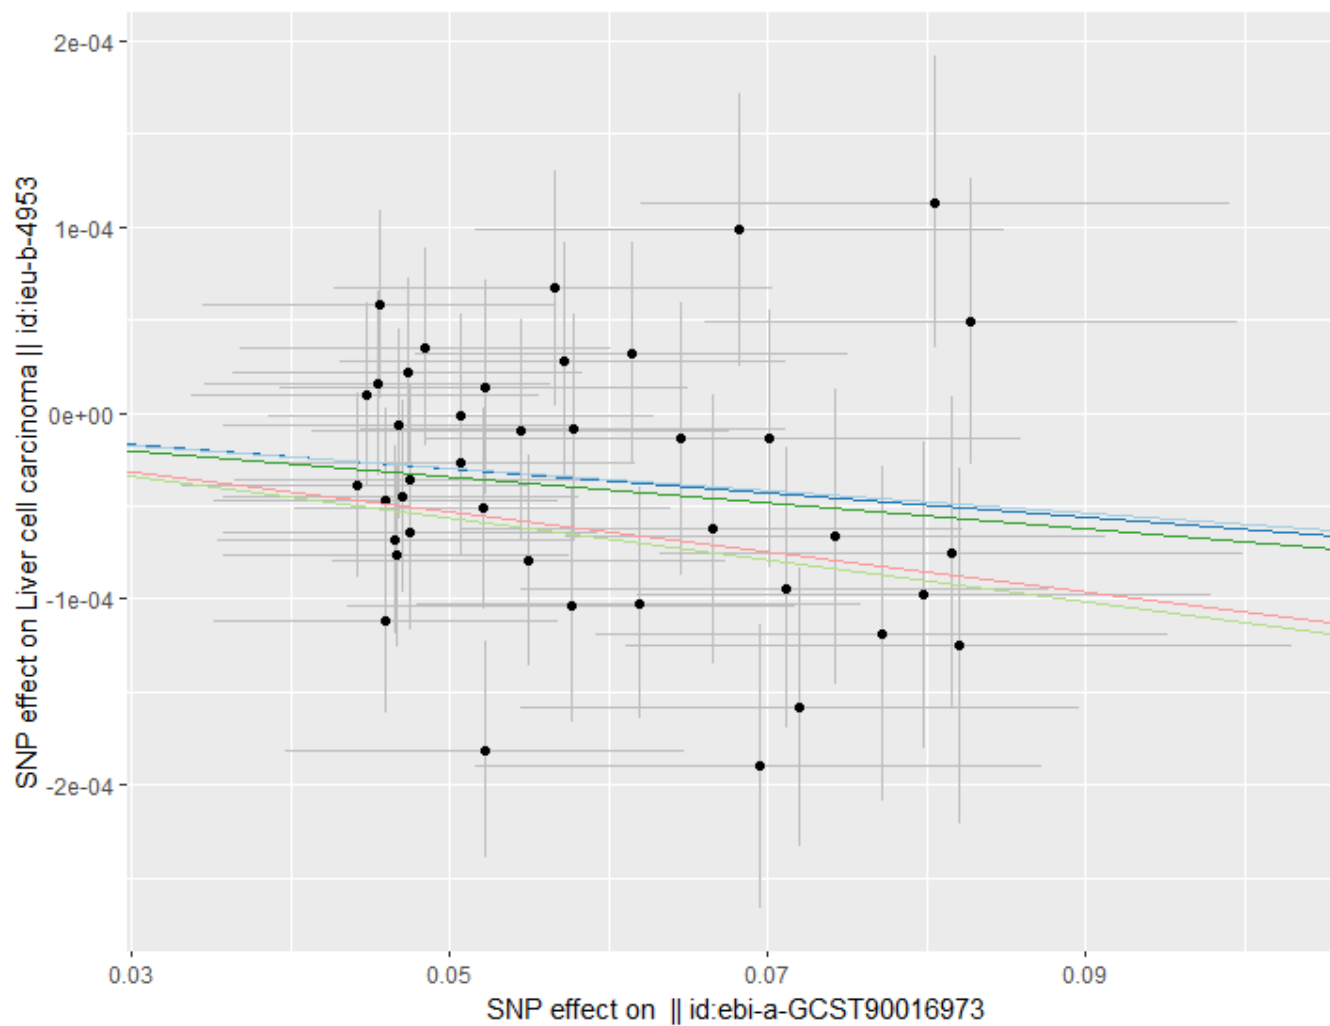

**Figure 182** Leave-one-out analysis, funnel plot, MR effect size and scatter plot for gut microbiota abundance (genus *Candidatus Soleaferrea* id.11350) on liver cell carcinoma

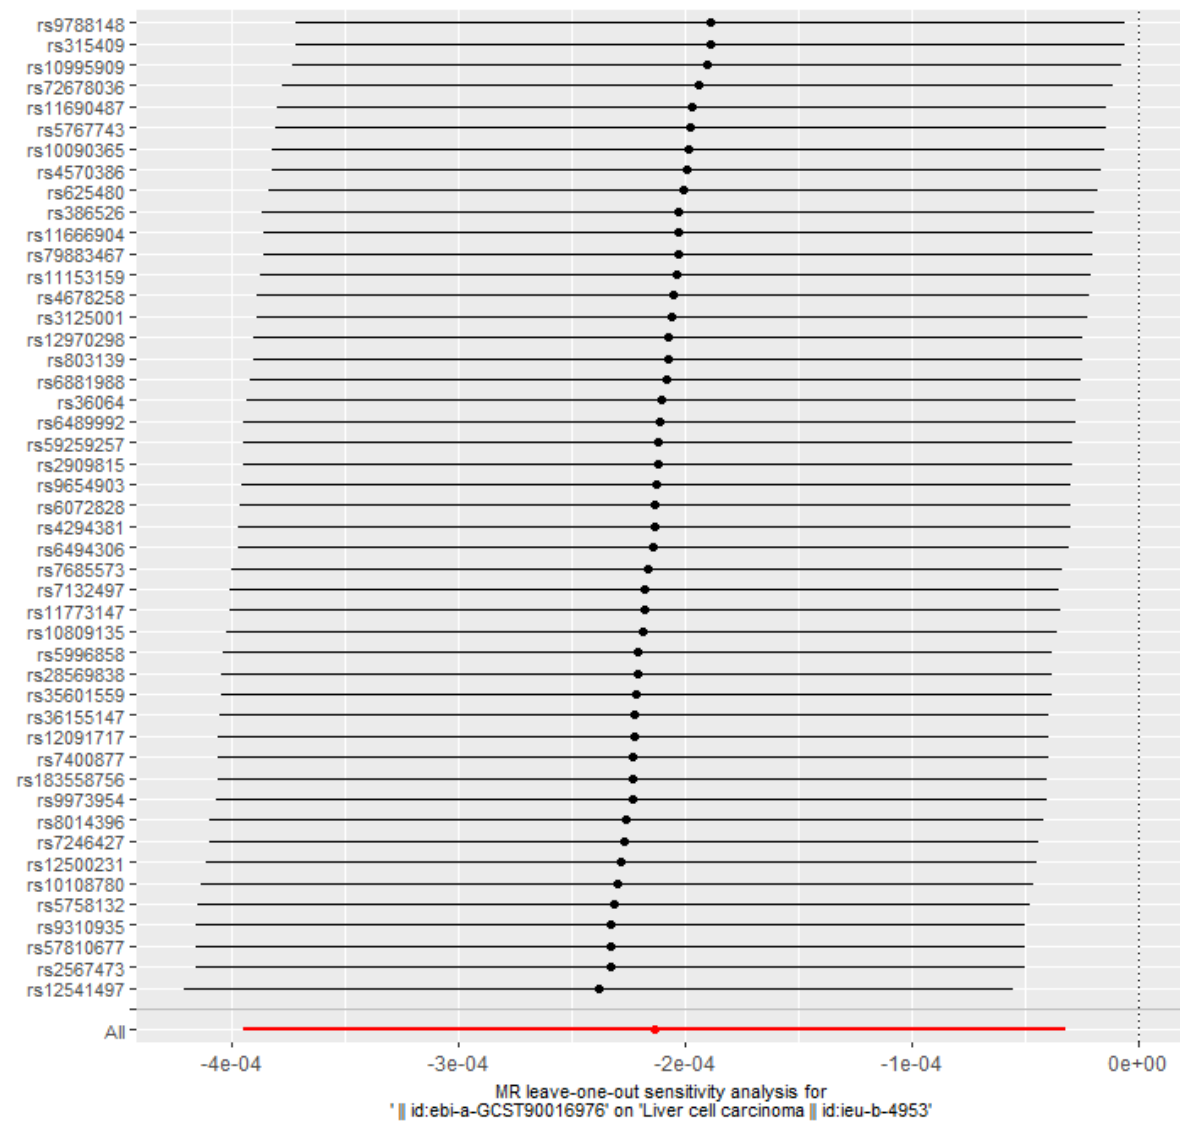

MR Method

- Inverse variance weighted
- MR Egger

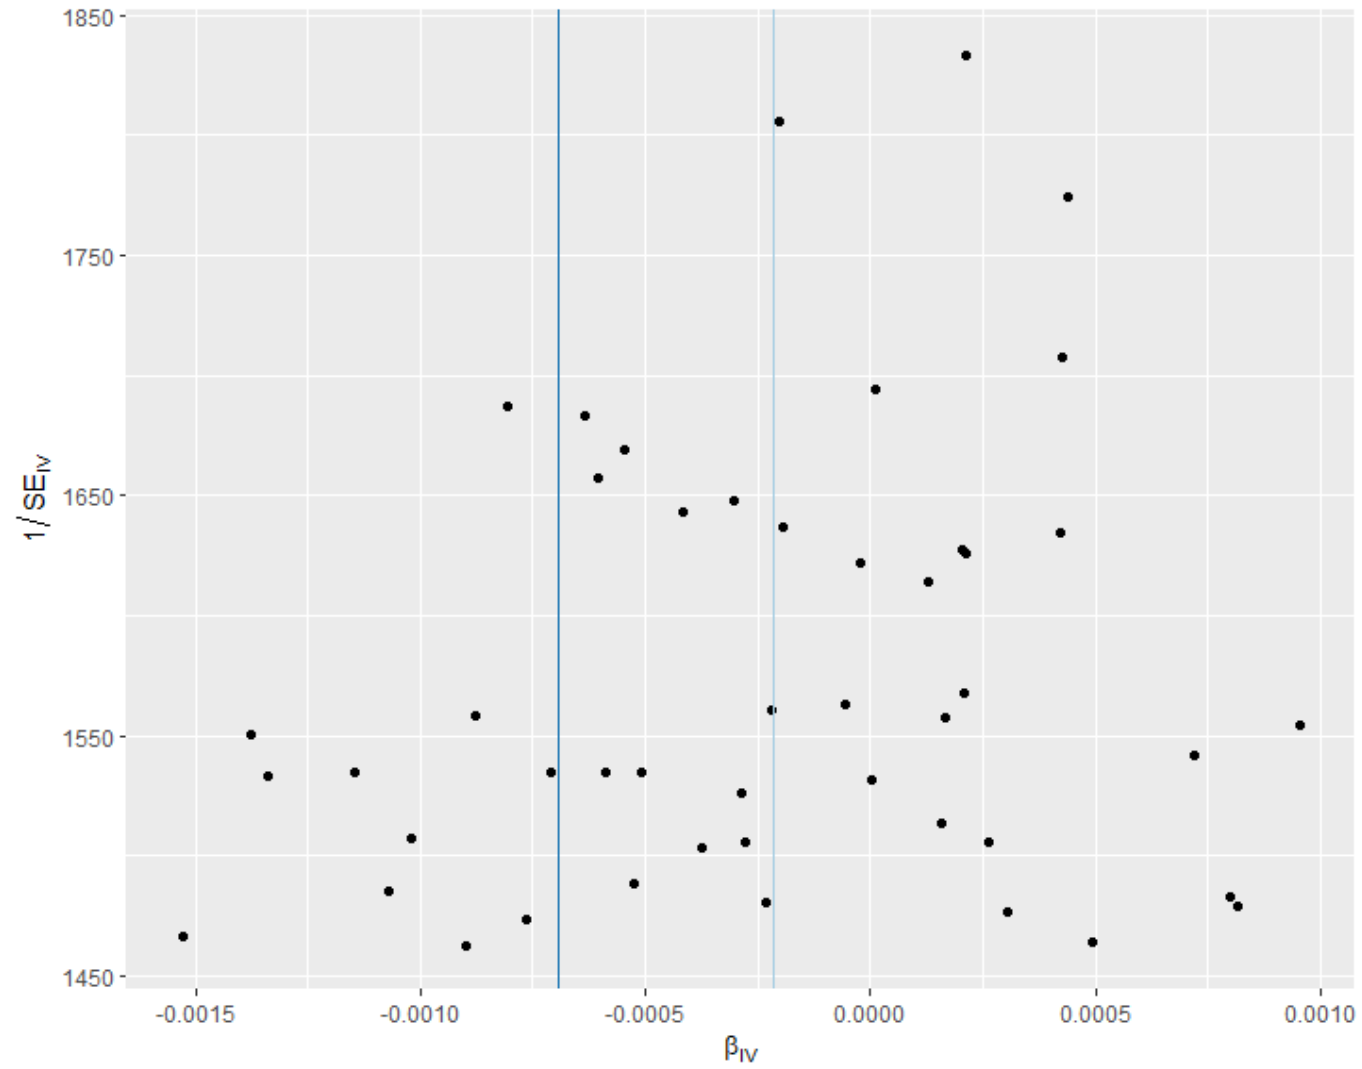

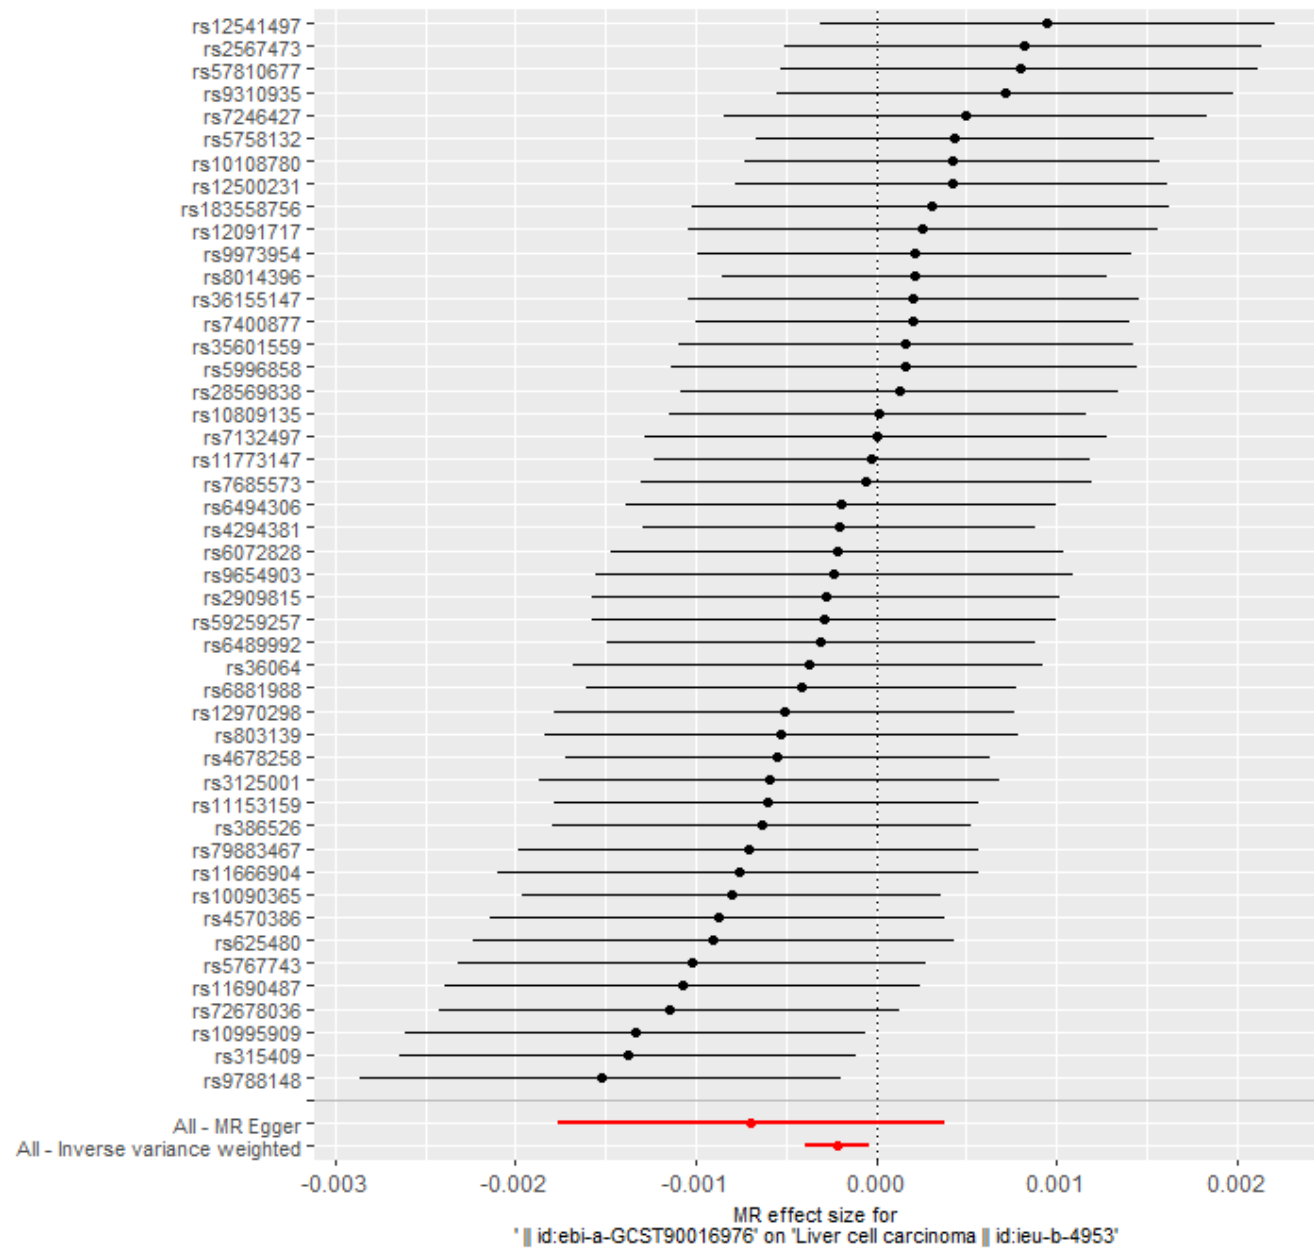

MR Test

- Inverse variance weighted
- MR Egger
- Simple mode
- Weighted median
- Weighted mode

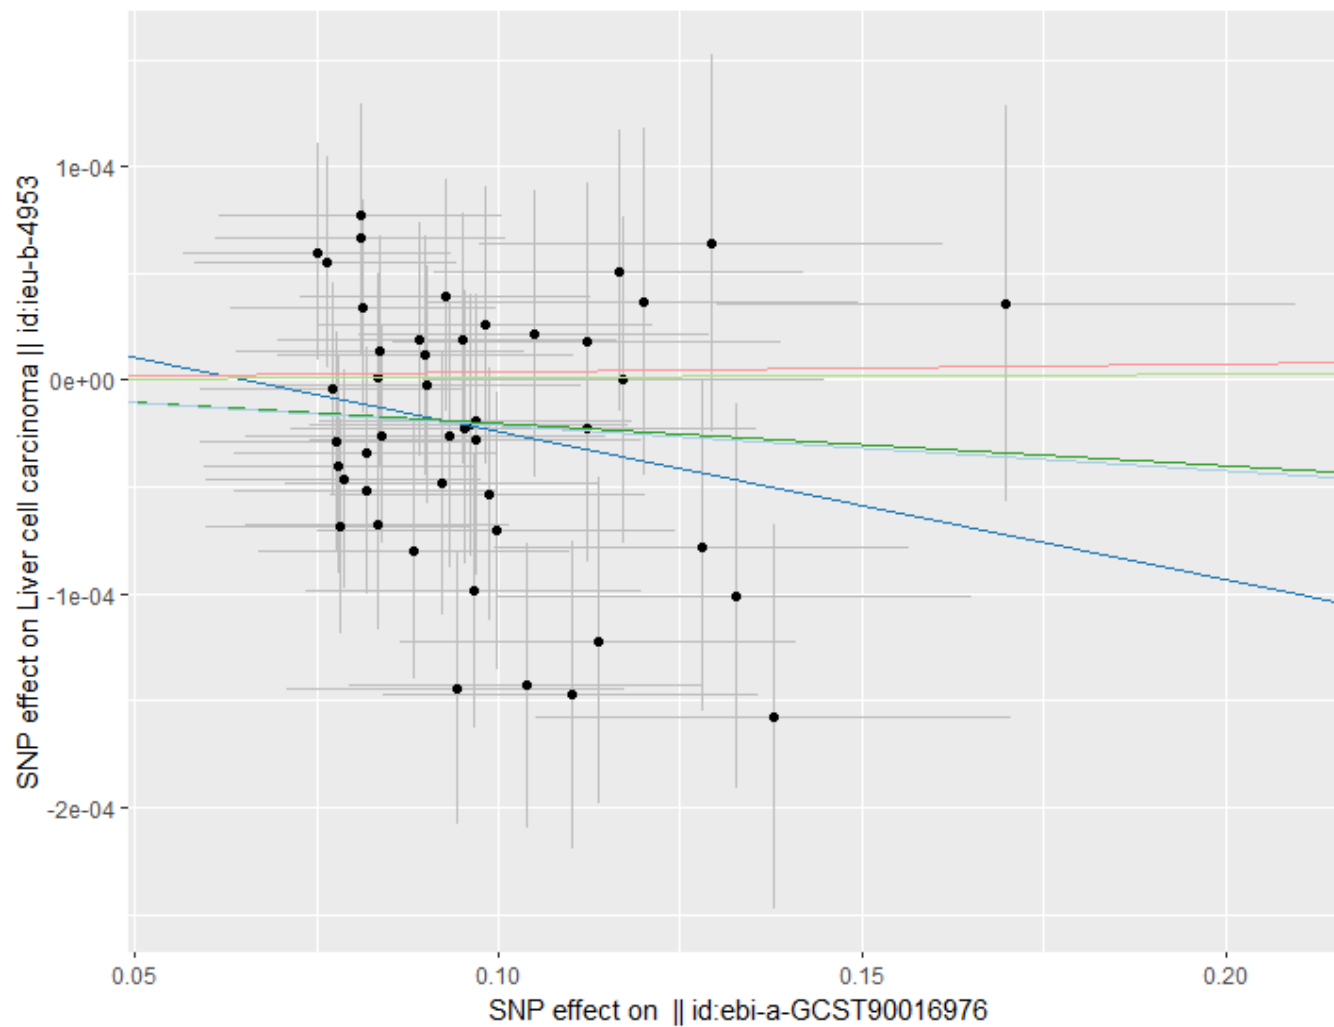



**Figure 183** Leave-one-out analysis, funnel plot, MR effect size and scatter plot for gut microbiota abundance (genus Christensenellaceae R 7group id.11283) on liver cell carcinoma

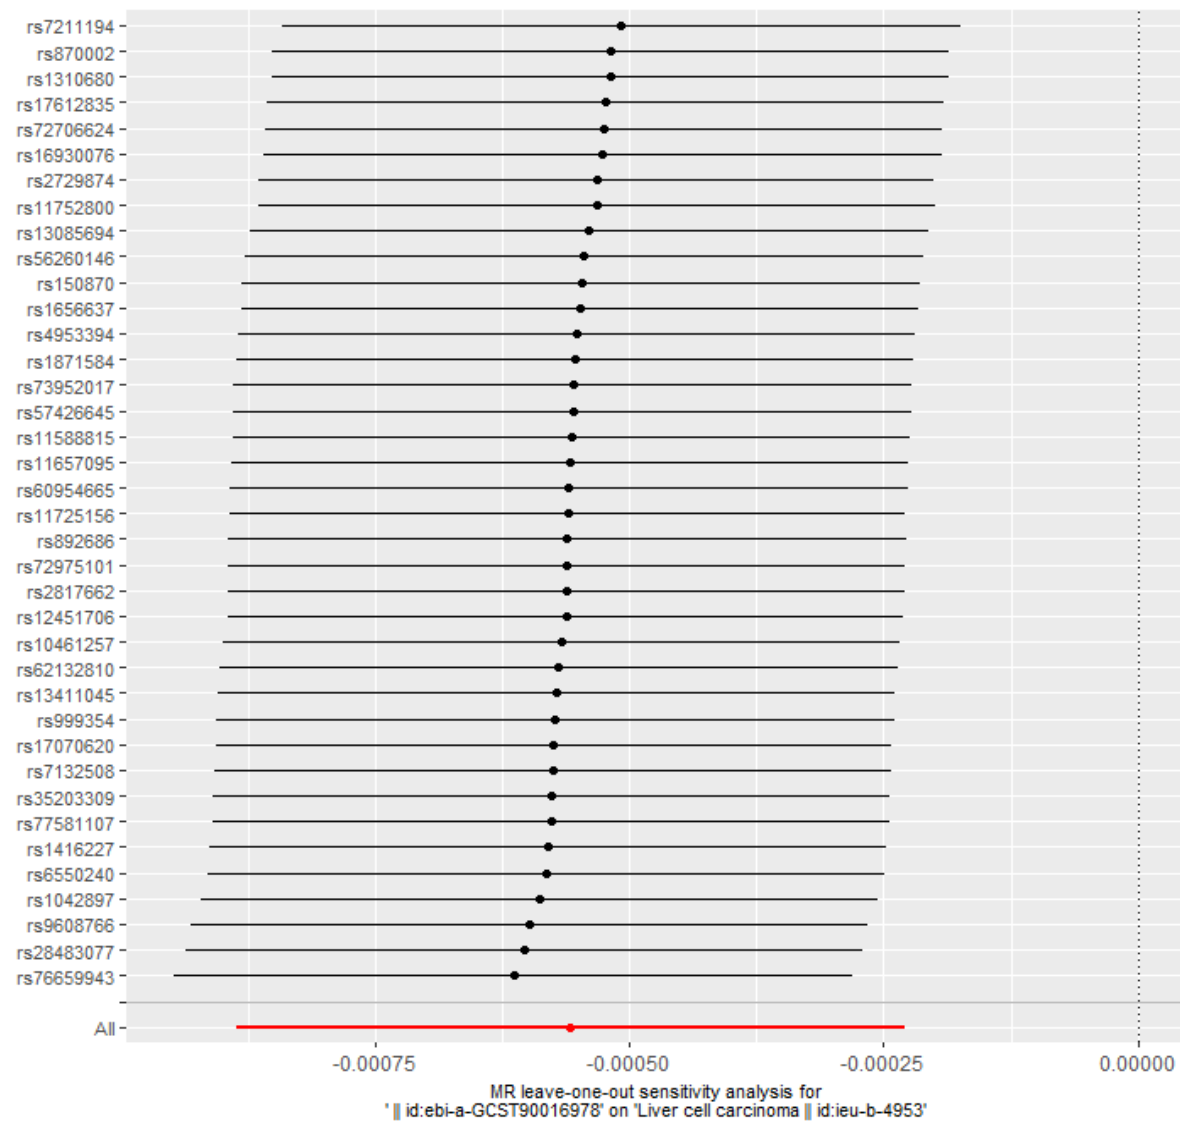

MR Method

- Inverse variance weighted
- MR Egger

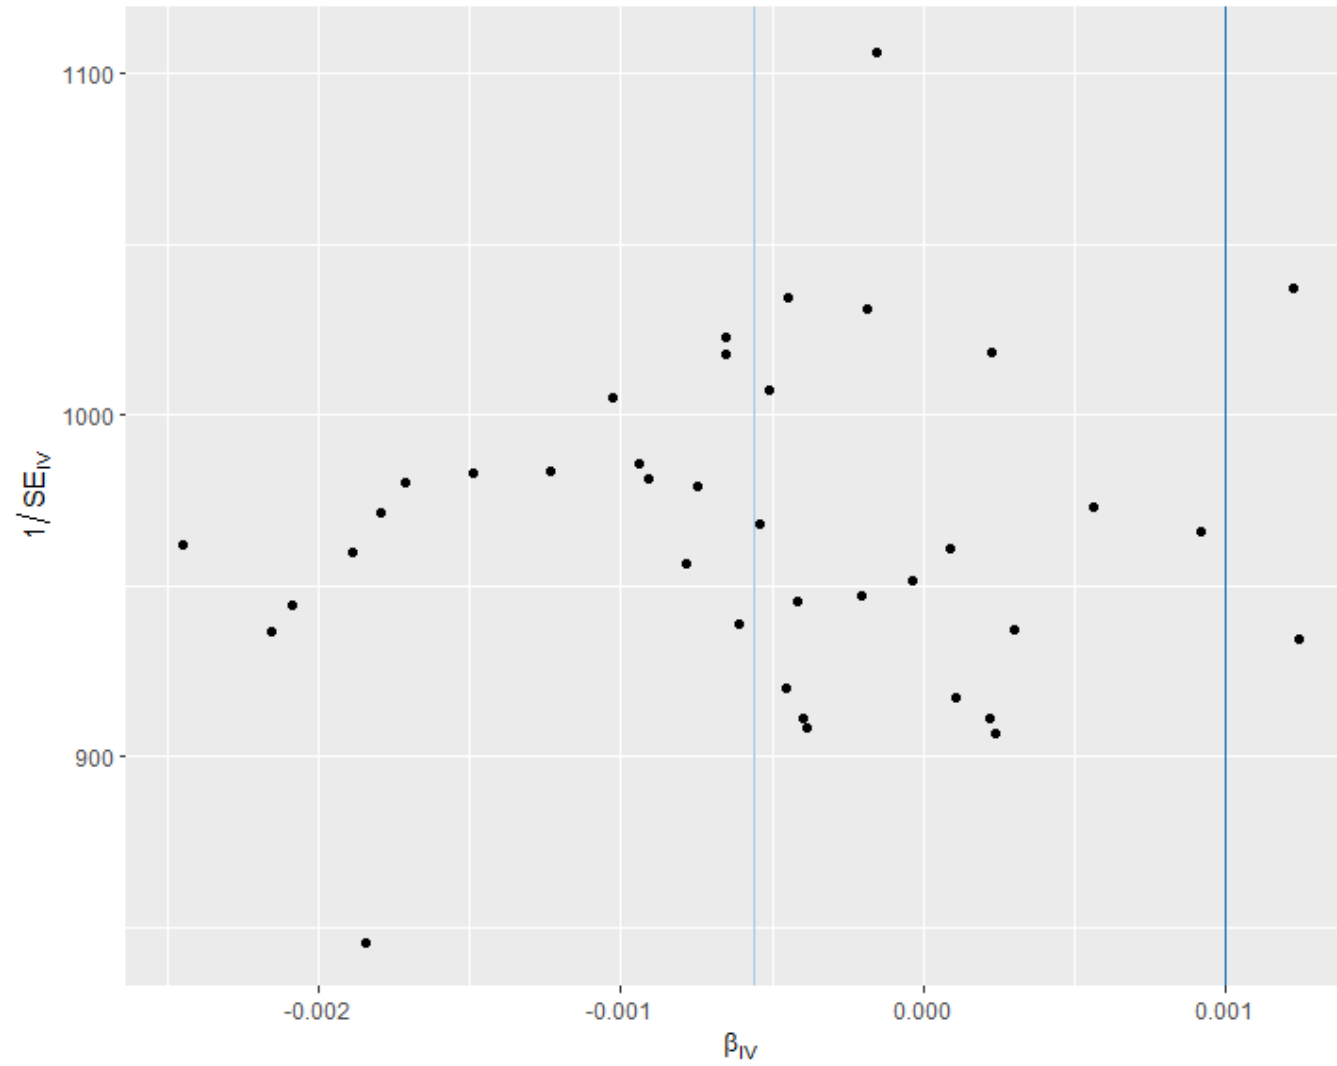

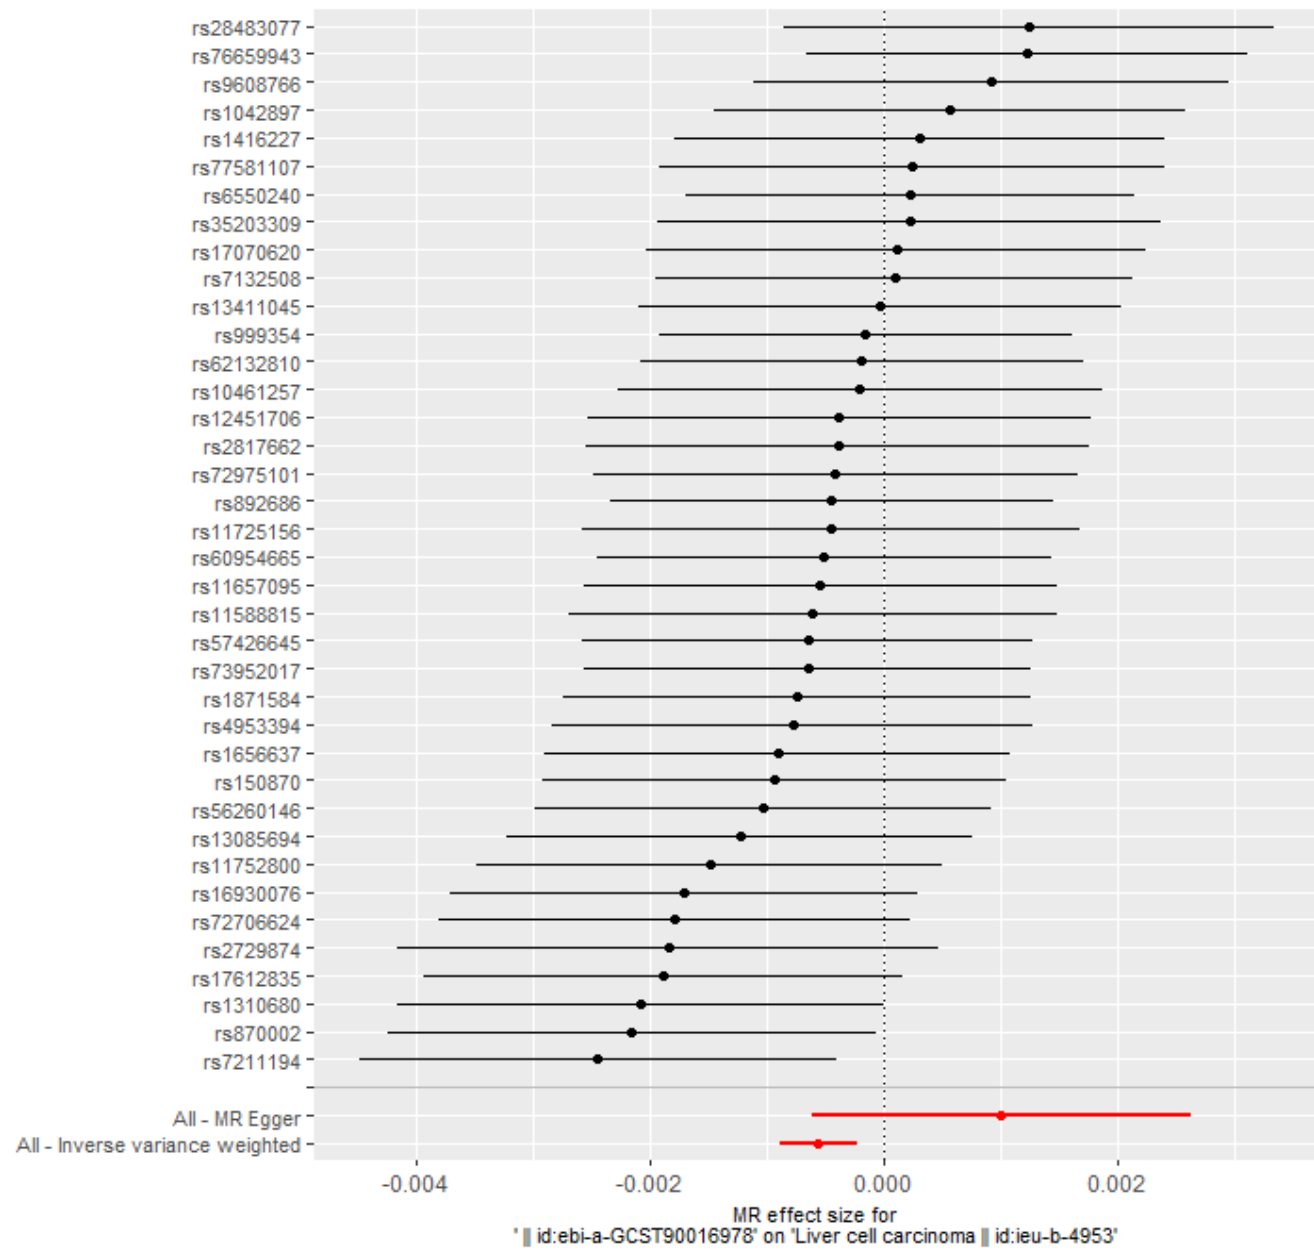

MR Test

- Inverse variance weighted
- MR Egger
- Simple mode
- Weighted median
- Weighted mode

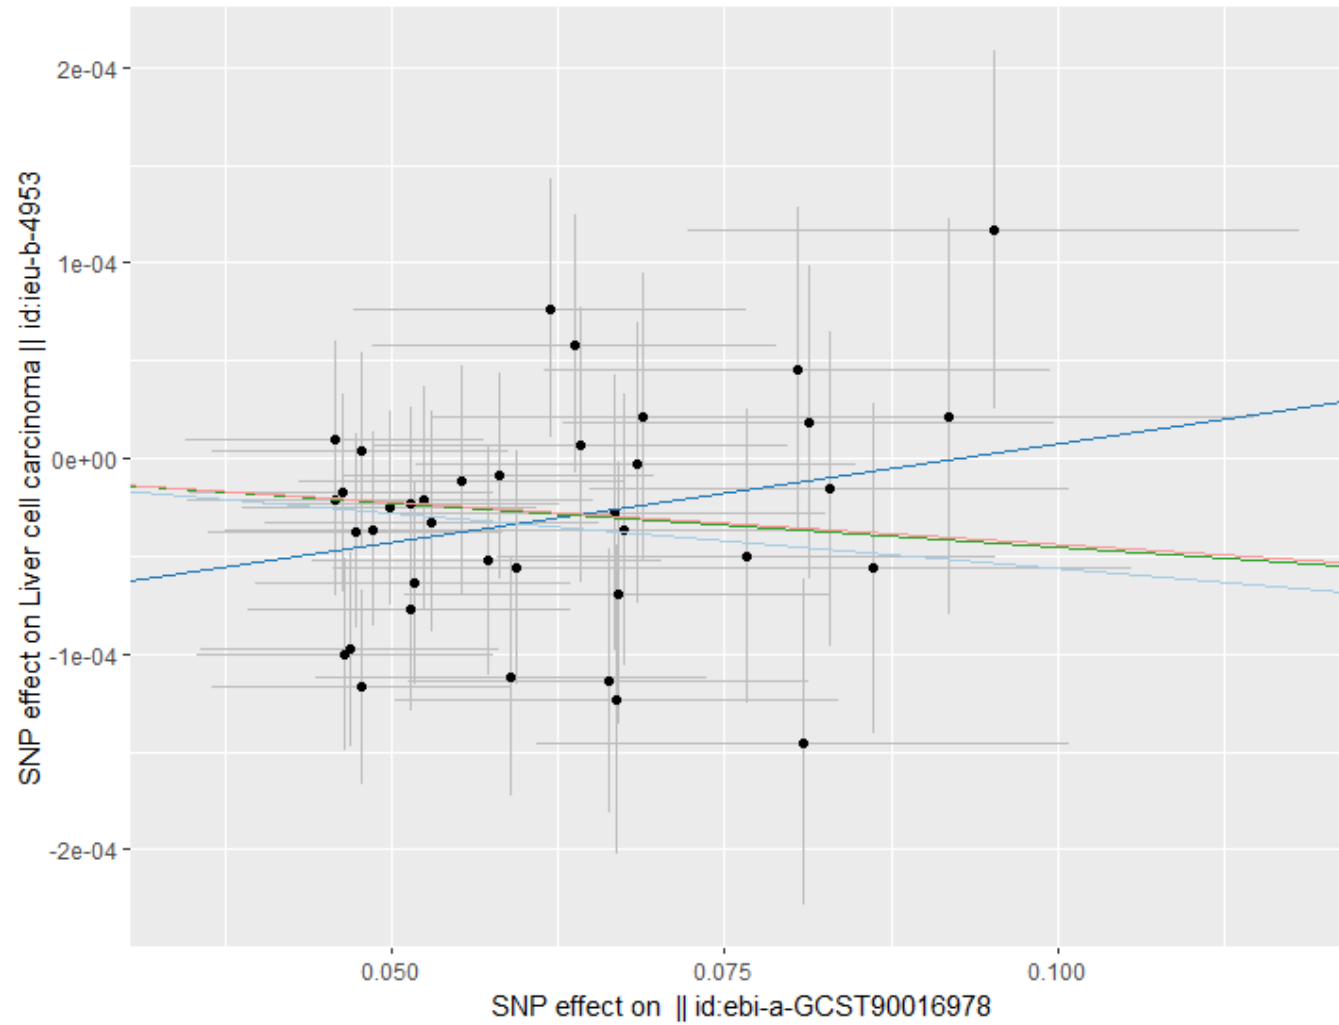

**Figure 184** Leave-one-out analysis, funnel plot, MR effect size and scatter plot for gut microbiota abundance (genus *Eubacterium rectale* group id.14374) on liver cell carcinoma

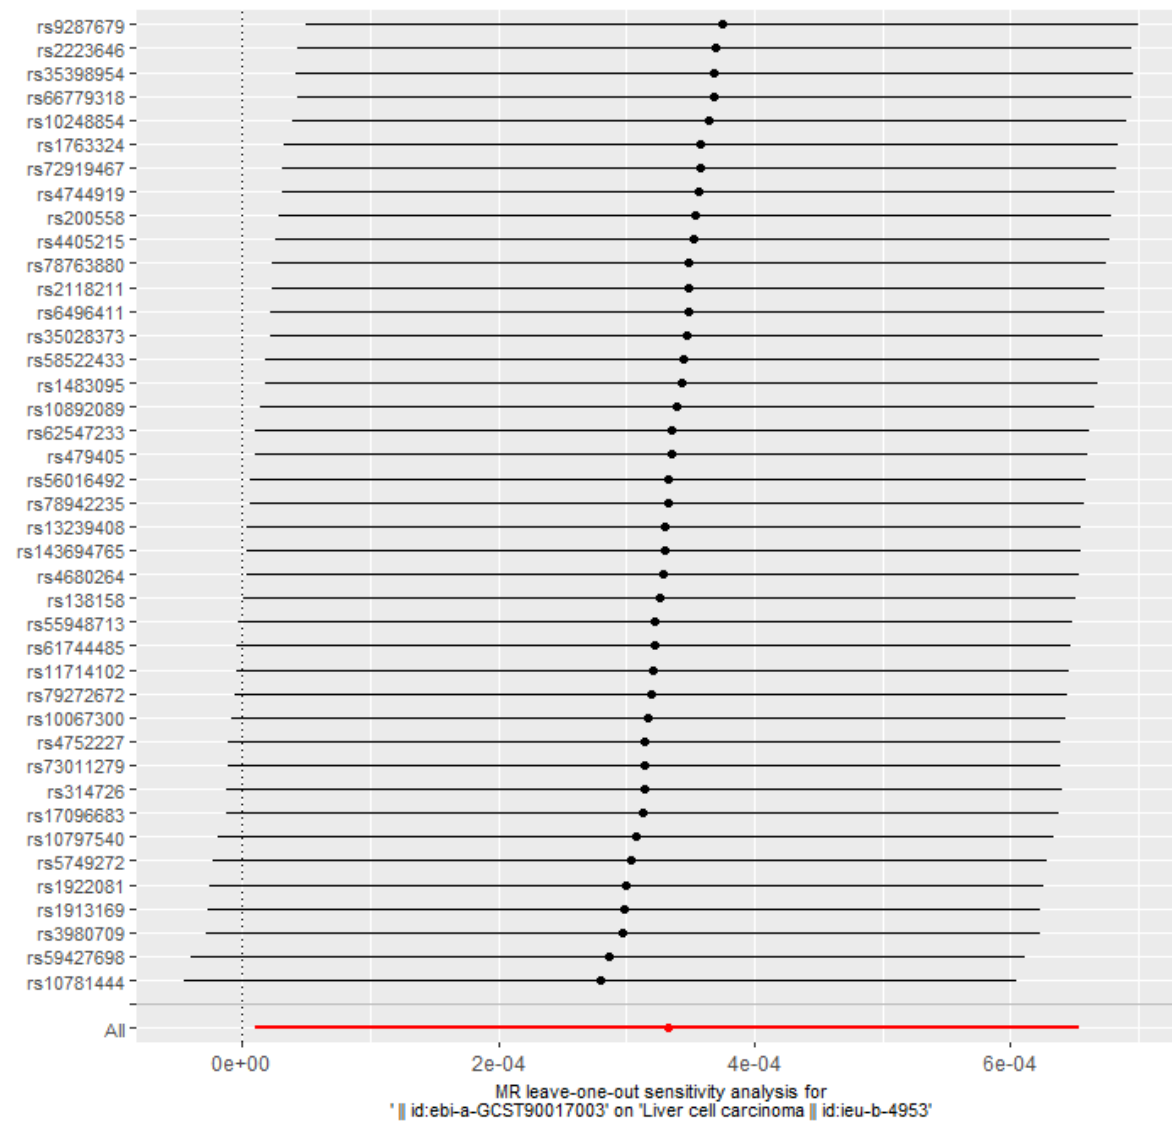

MR Method

- Inverse variance weighted
- MR Egger

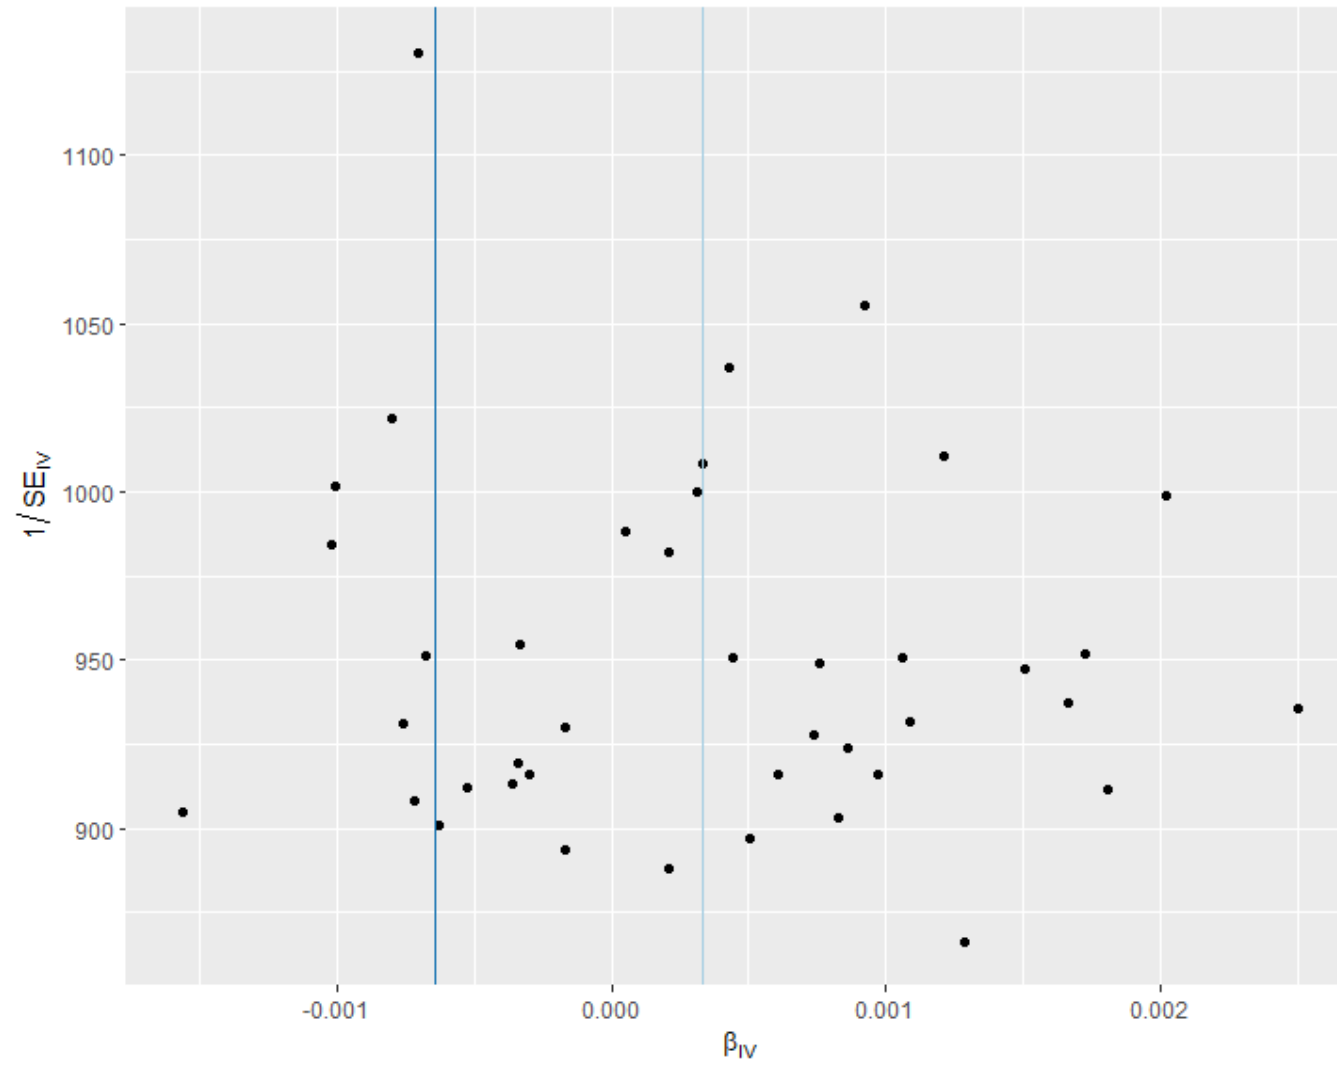

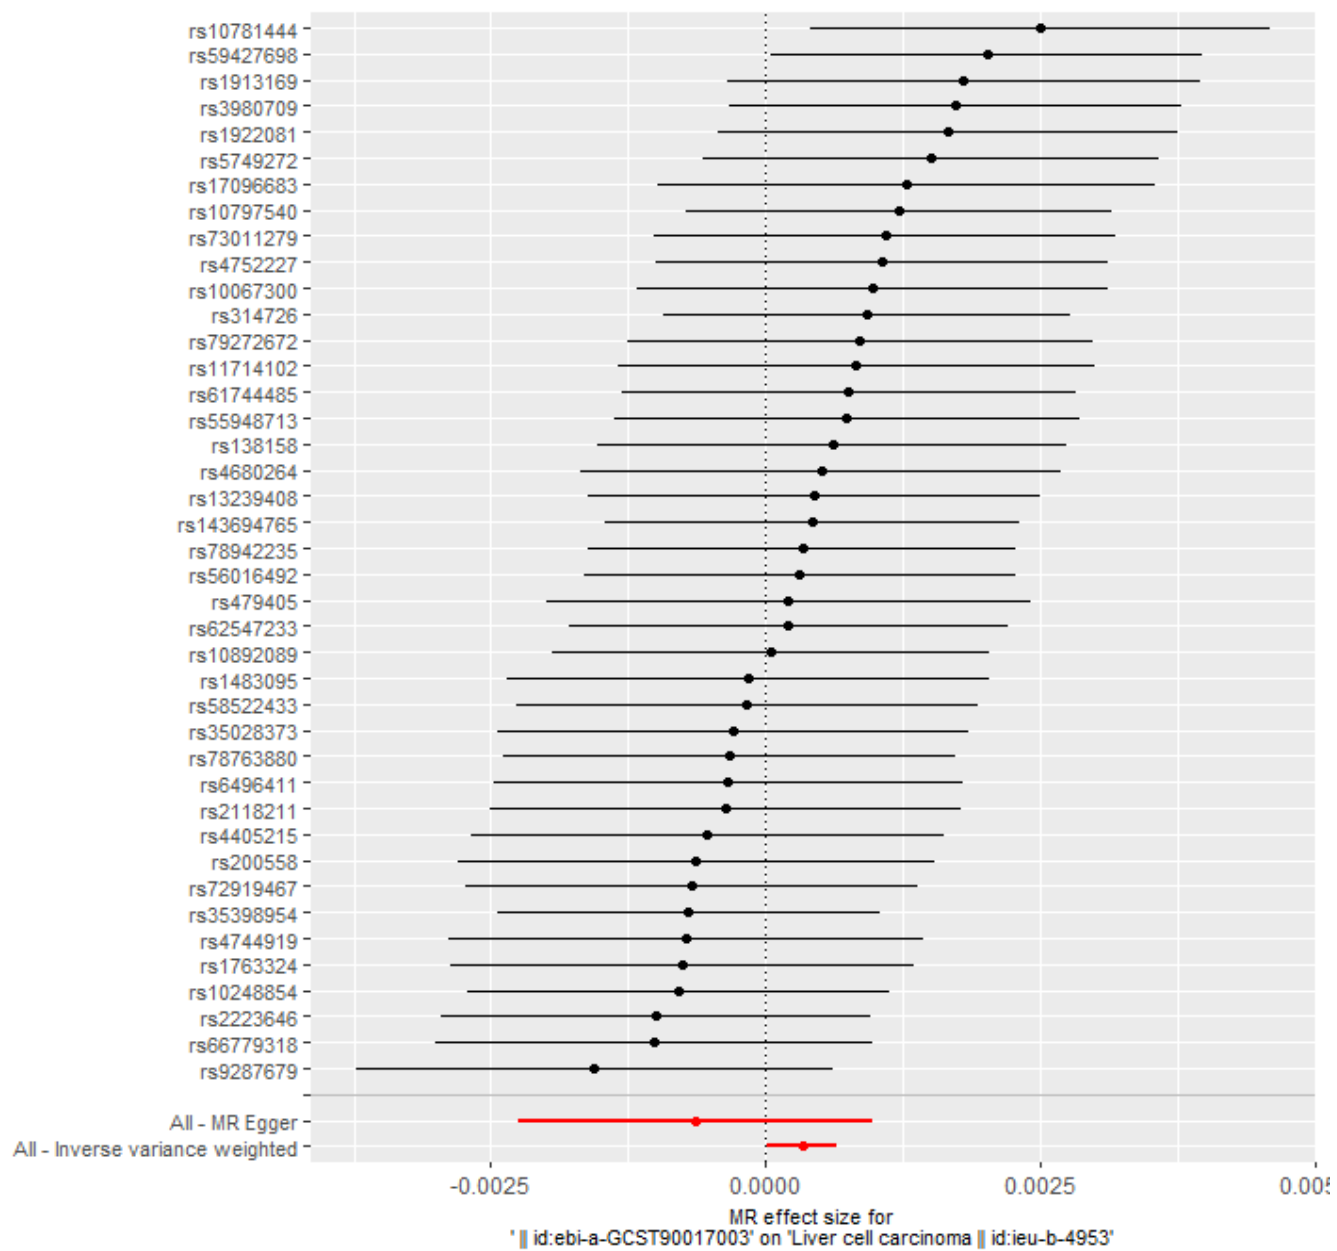

MR Test

- Inverse variance weighted
- MR Egger
- Simple mode
- Weighted median
- Weighted mode

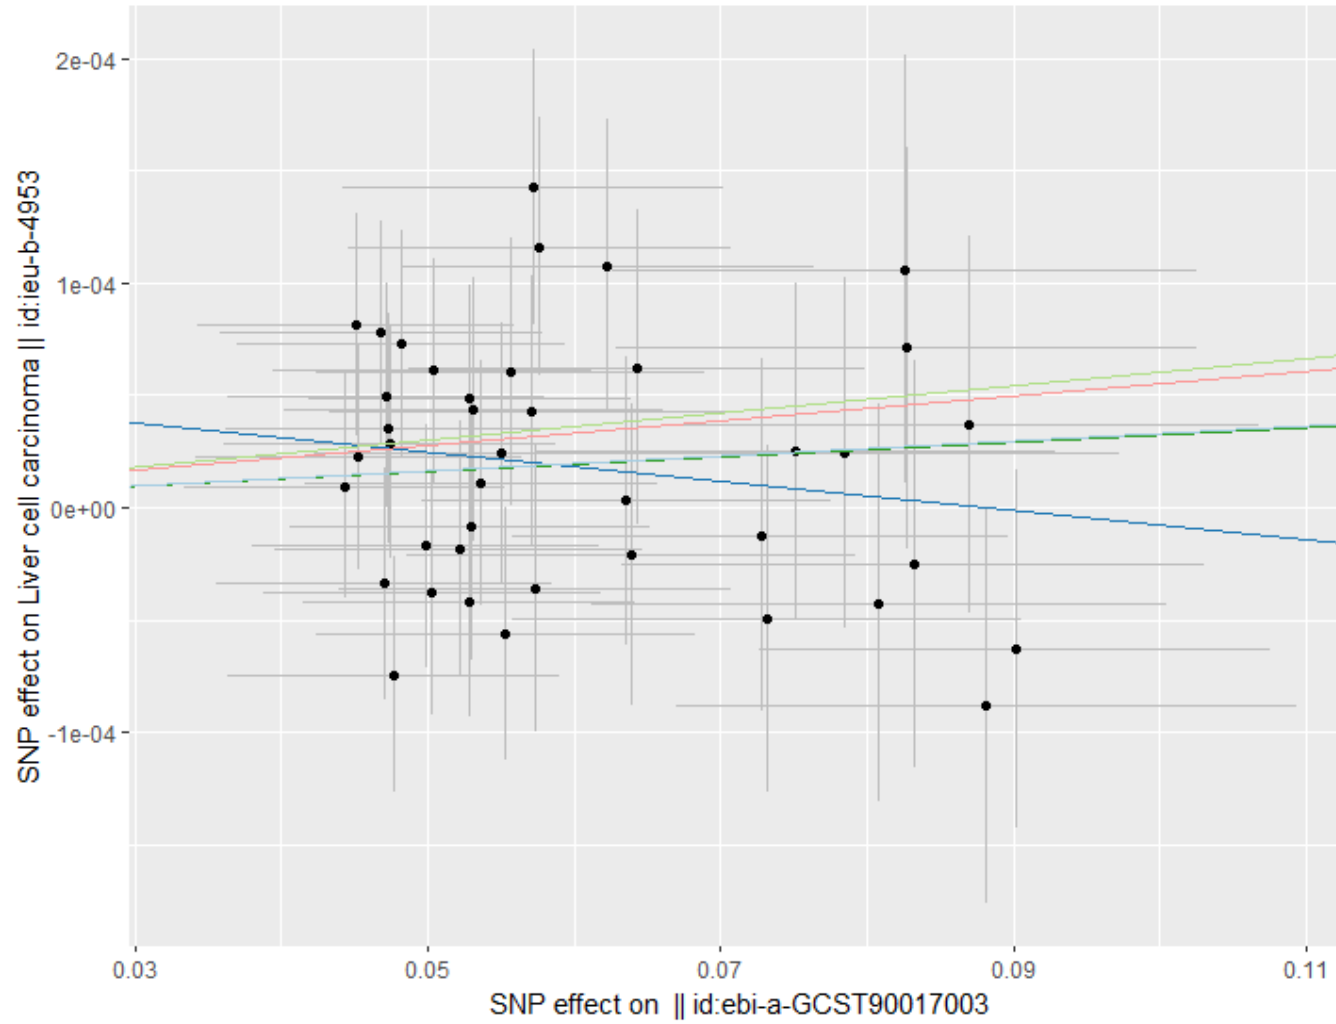



**Figure 185** Leave-one-out analysis, funnel plot, MR effect size and scatter plot for gut microbiota abundance (genus *Holdemanella* id.11393) on liver cell carcinoma

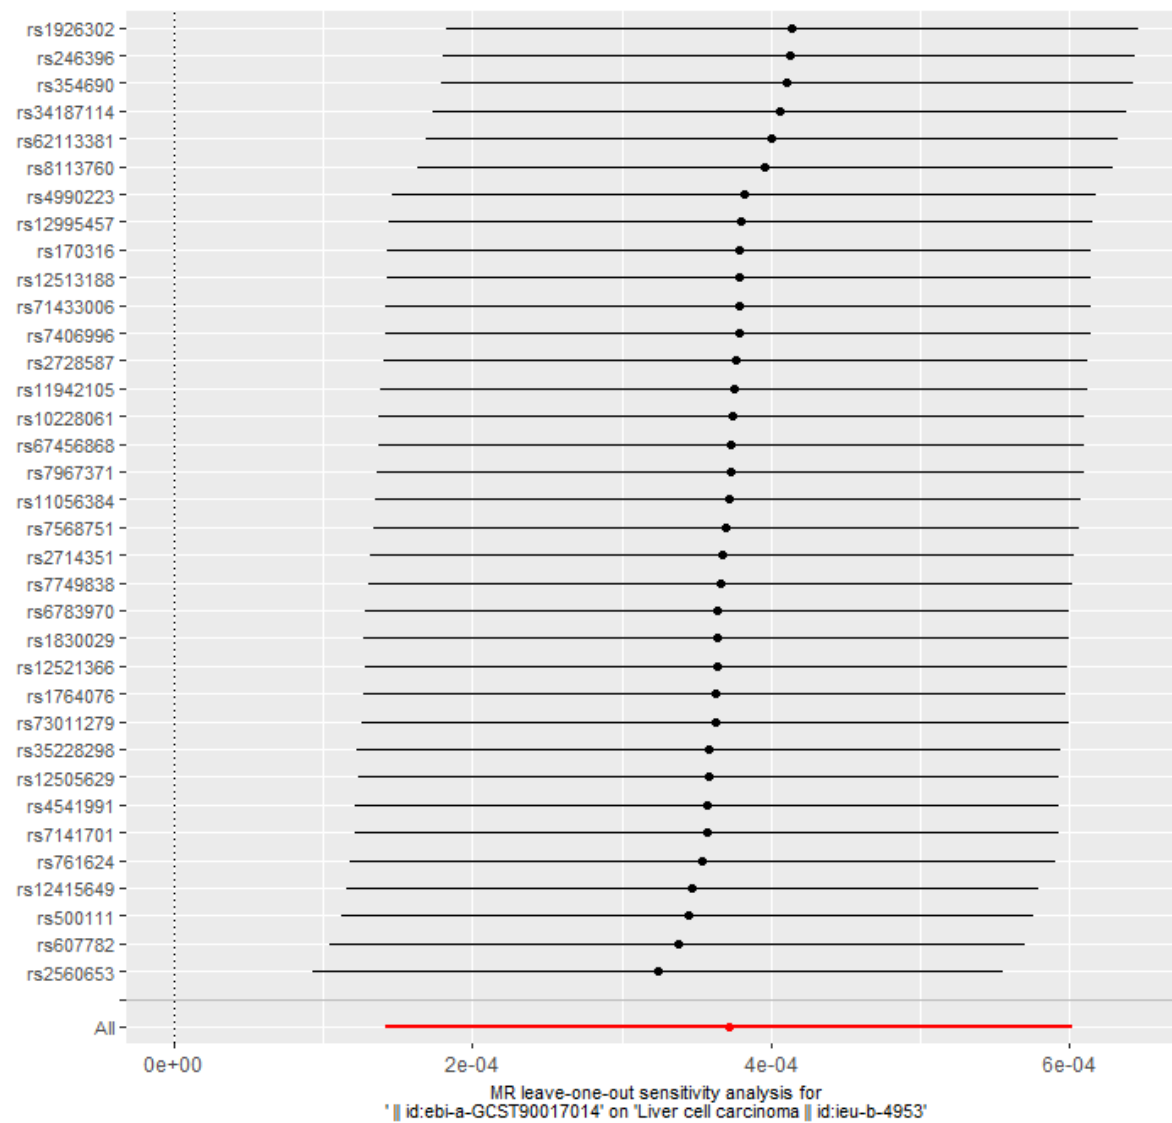

MR Method

- Inverse variance weighted
- MR Egger

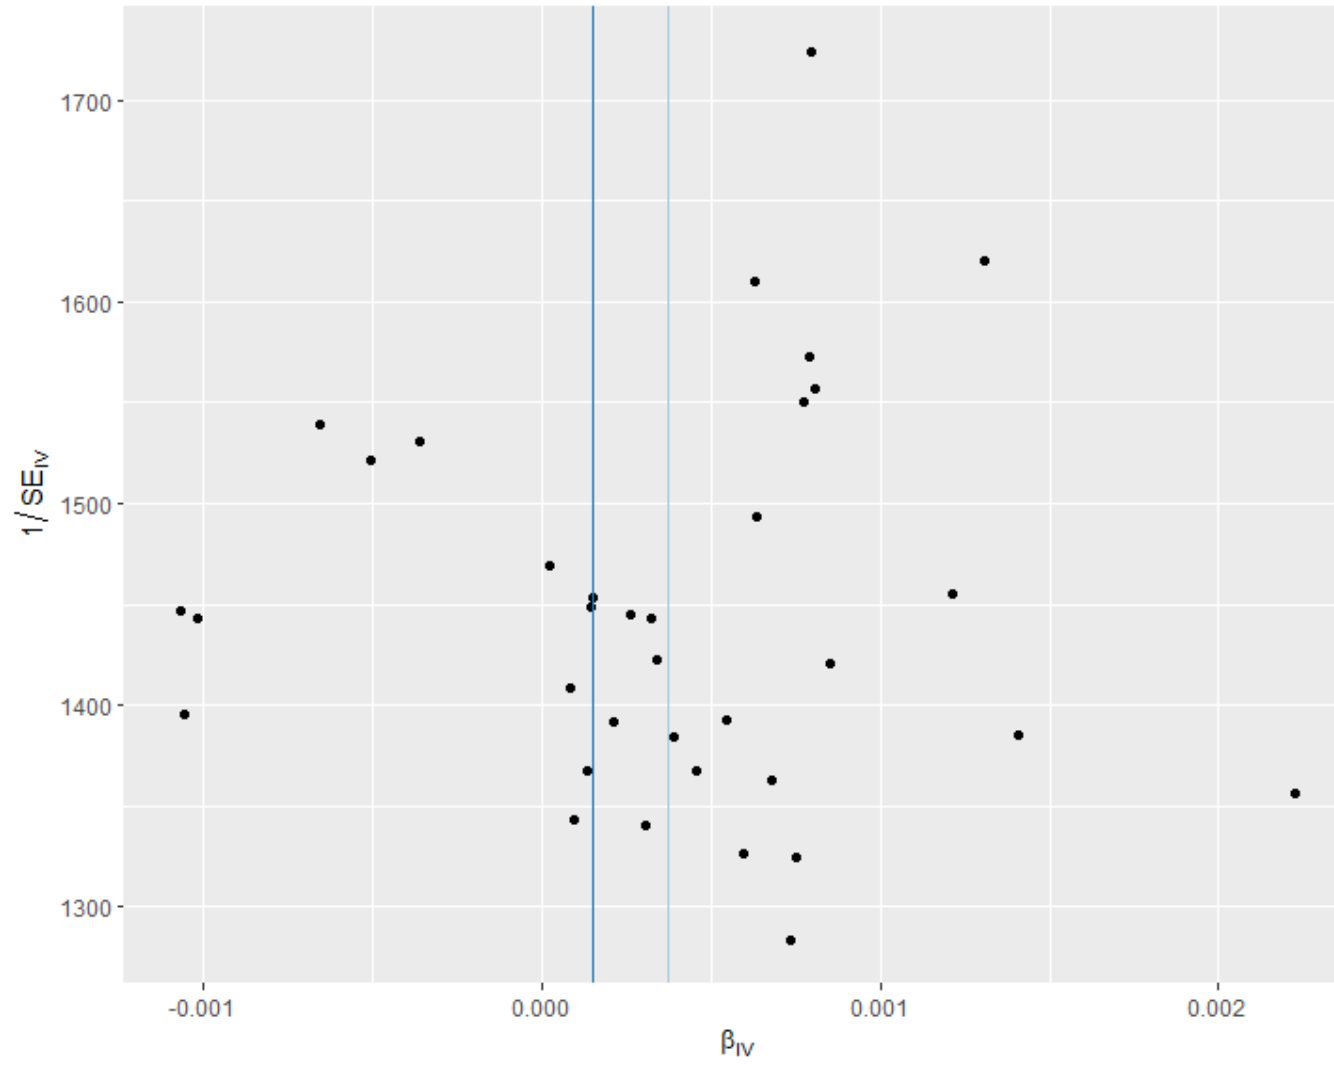

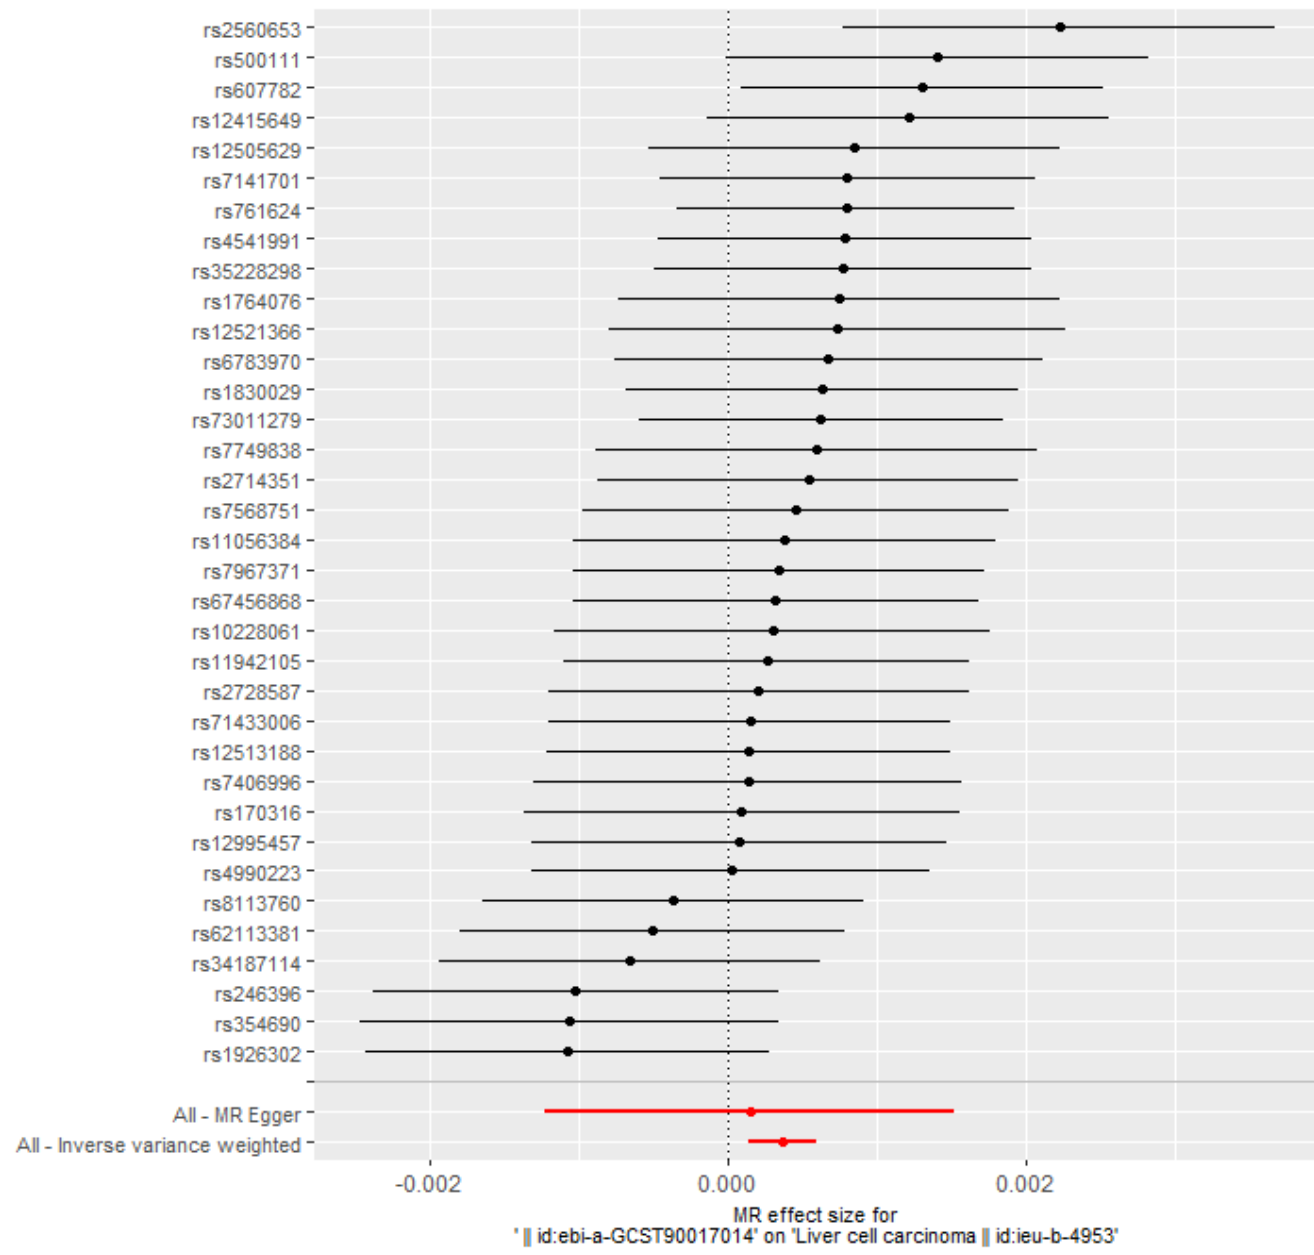

MR Test

- Inverse variance weighted
- MR Egger
- Simple mode
- Weighted median
- Weighted mode

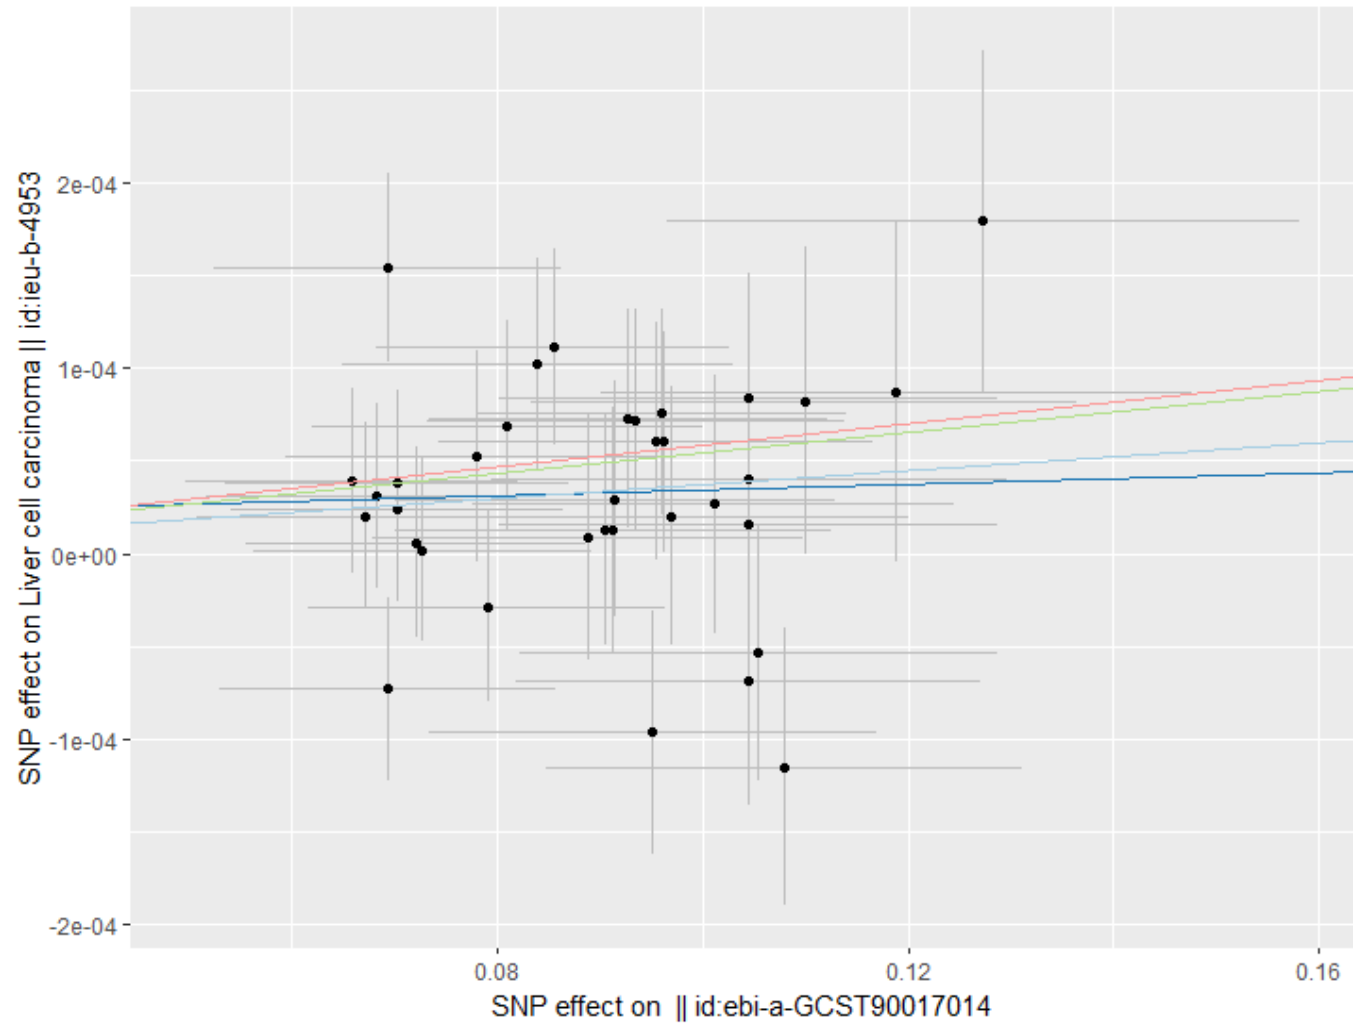

**Figure 186** Leave-one-out analysis, funnel plot, MR effect size and scatter plot for gut microbiota abundance (genus Lachnospiraceae NK4A136 group id.11319) on liver cell carcinoma

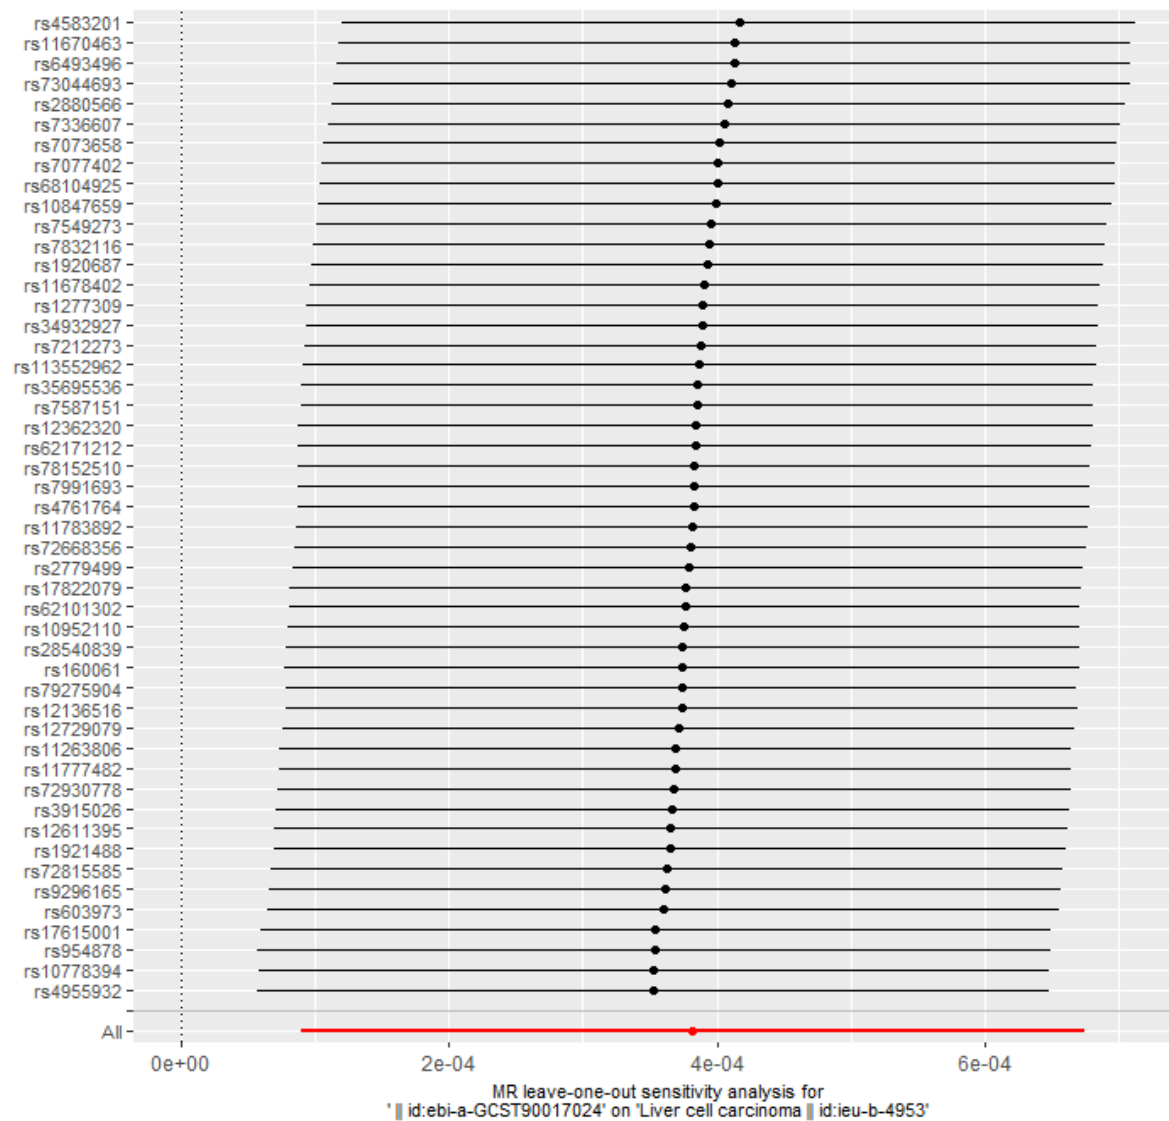

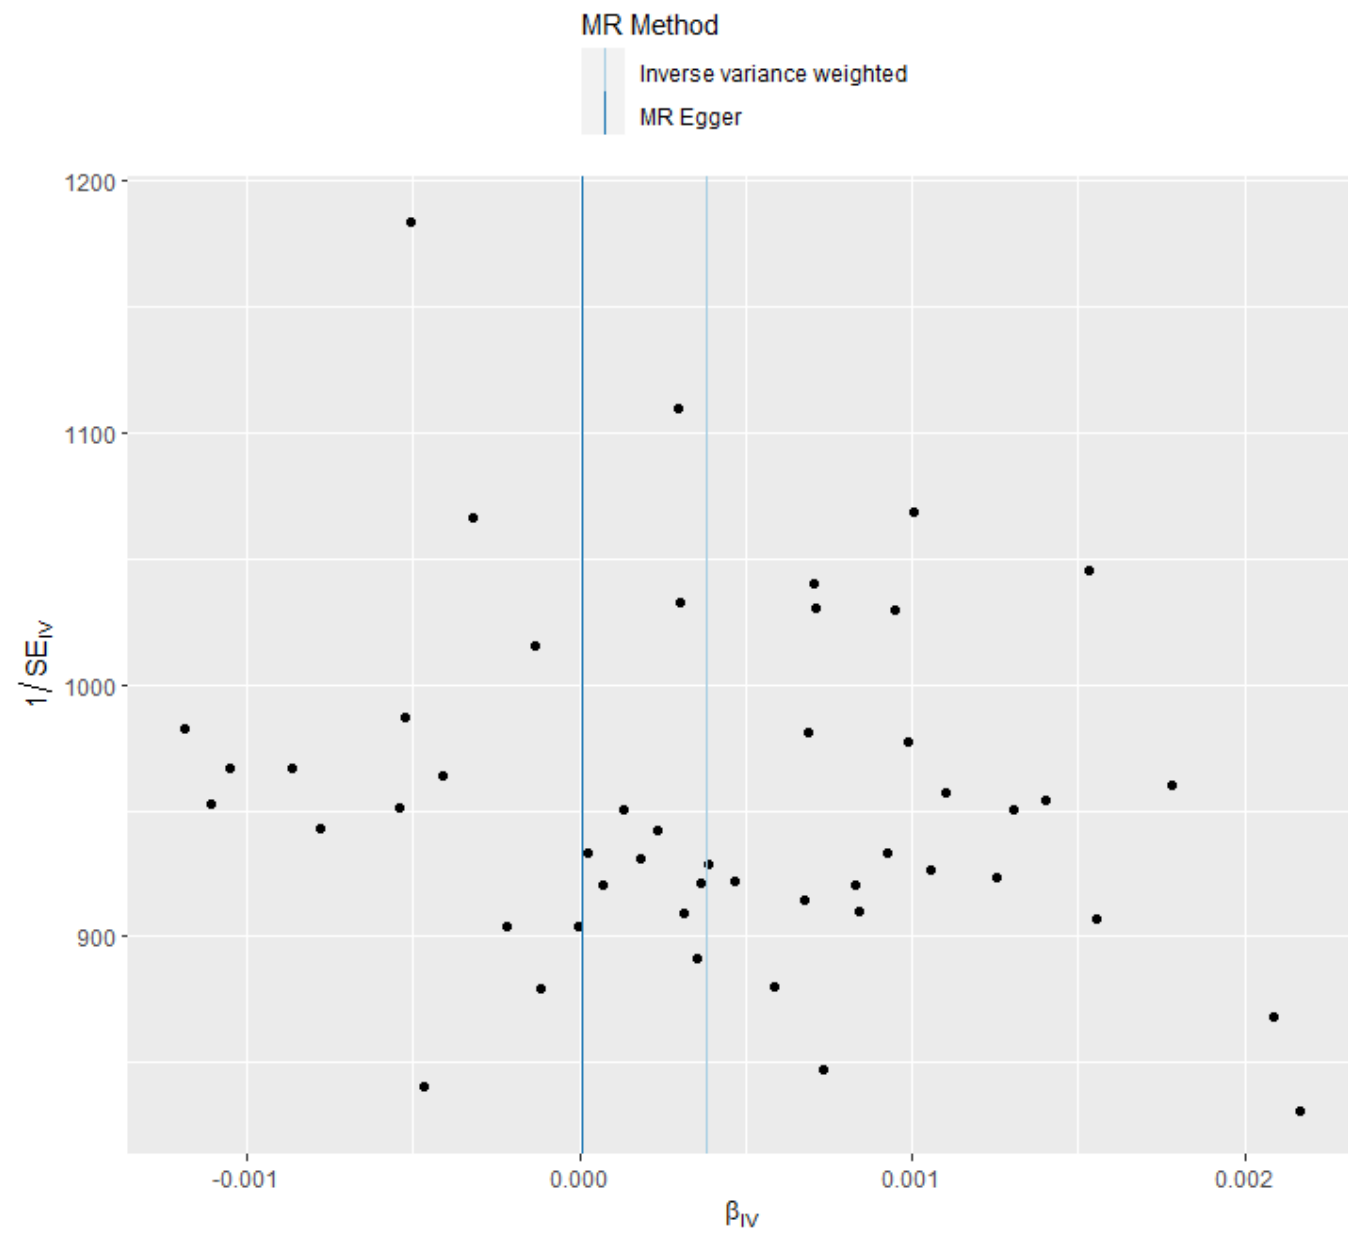

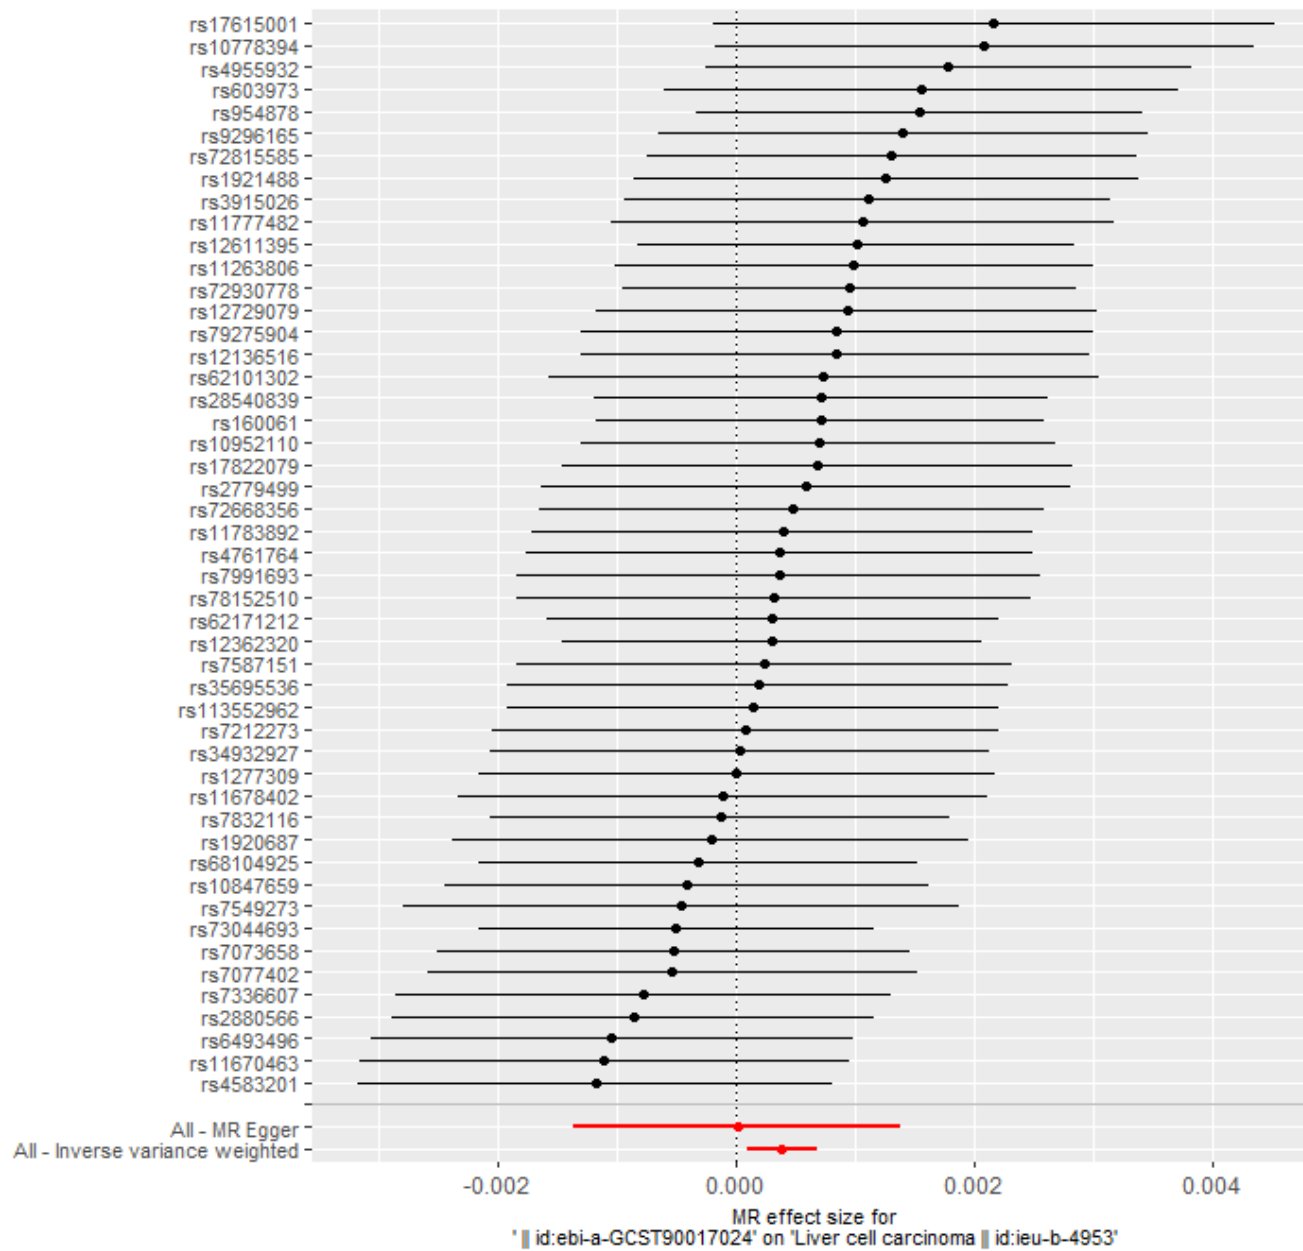

MR Test

- Inverse variance weighted
- MR Egger
- Simple mode
- Weighted median
- Weighted mode

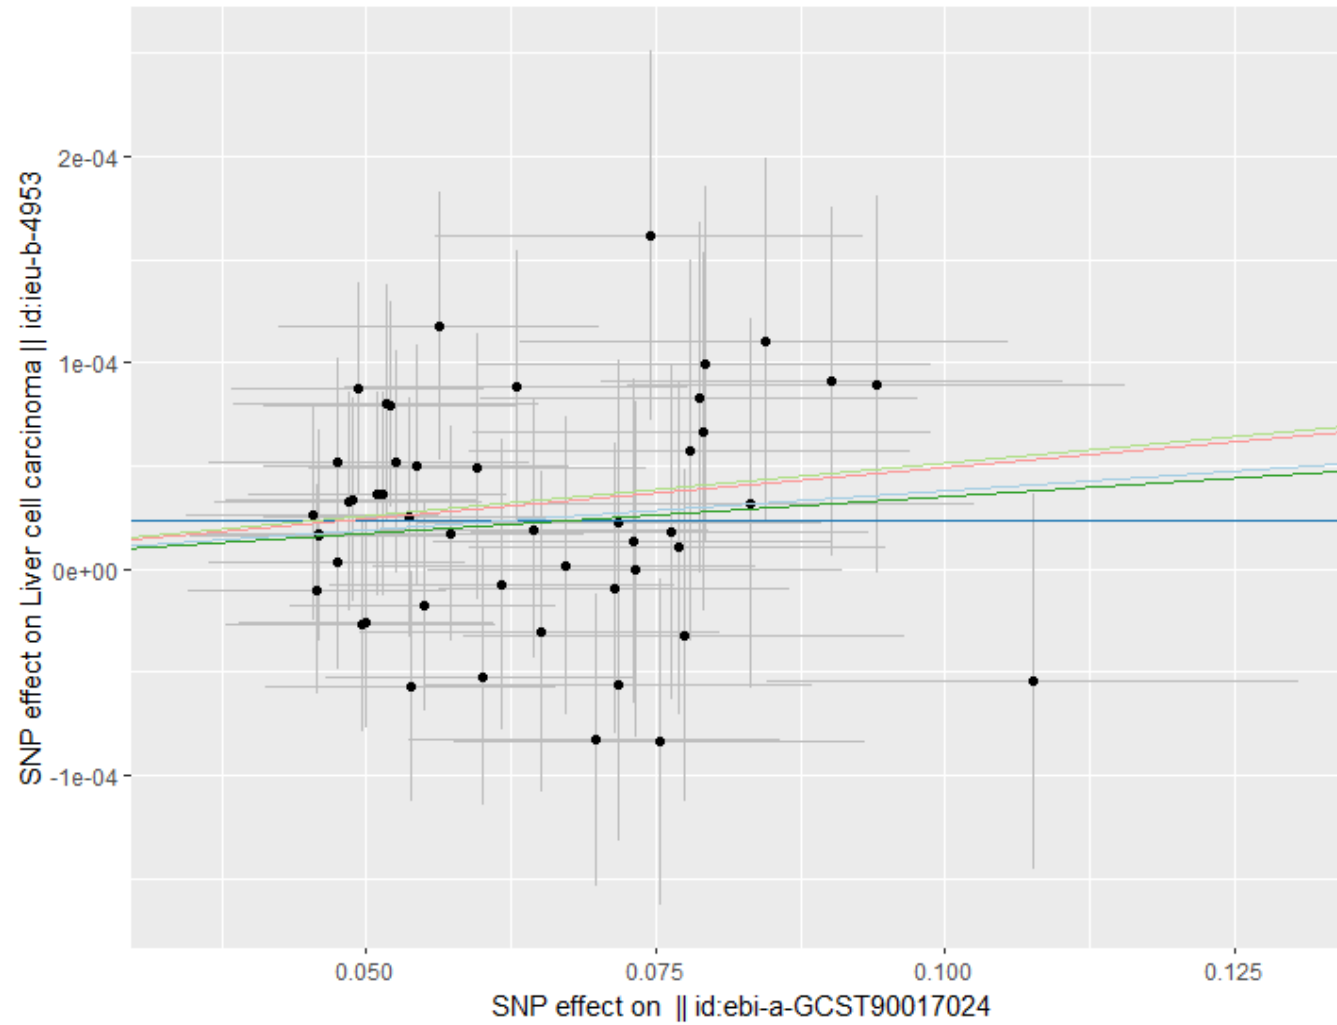



**Figure 187** Leave-one-out analysis, funnel plot, MR effect size and scatter plot for gut microbiota abundance (genus Peptococcus id.2037) on liver cell carcinoma

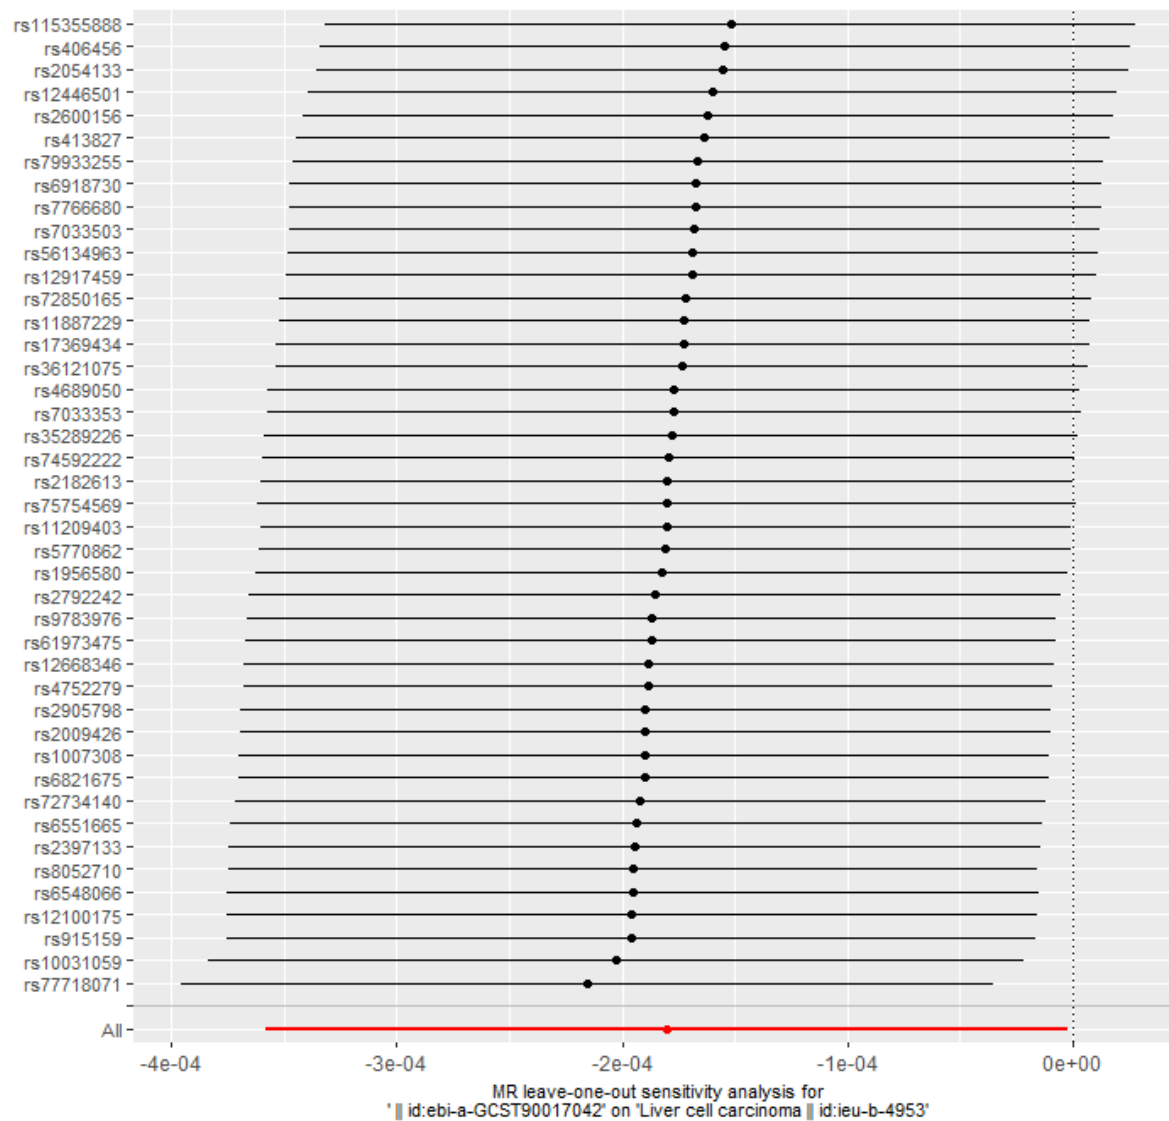

MR Method

- Inverse variance weighted
- MR Egger

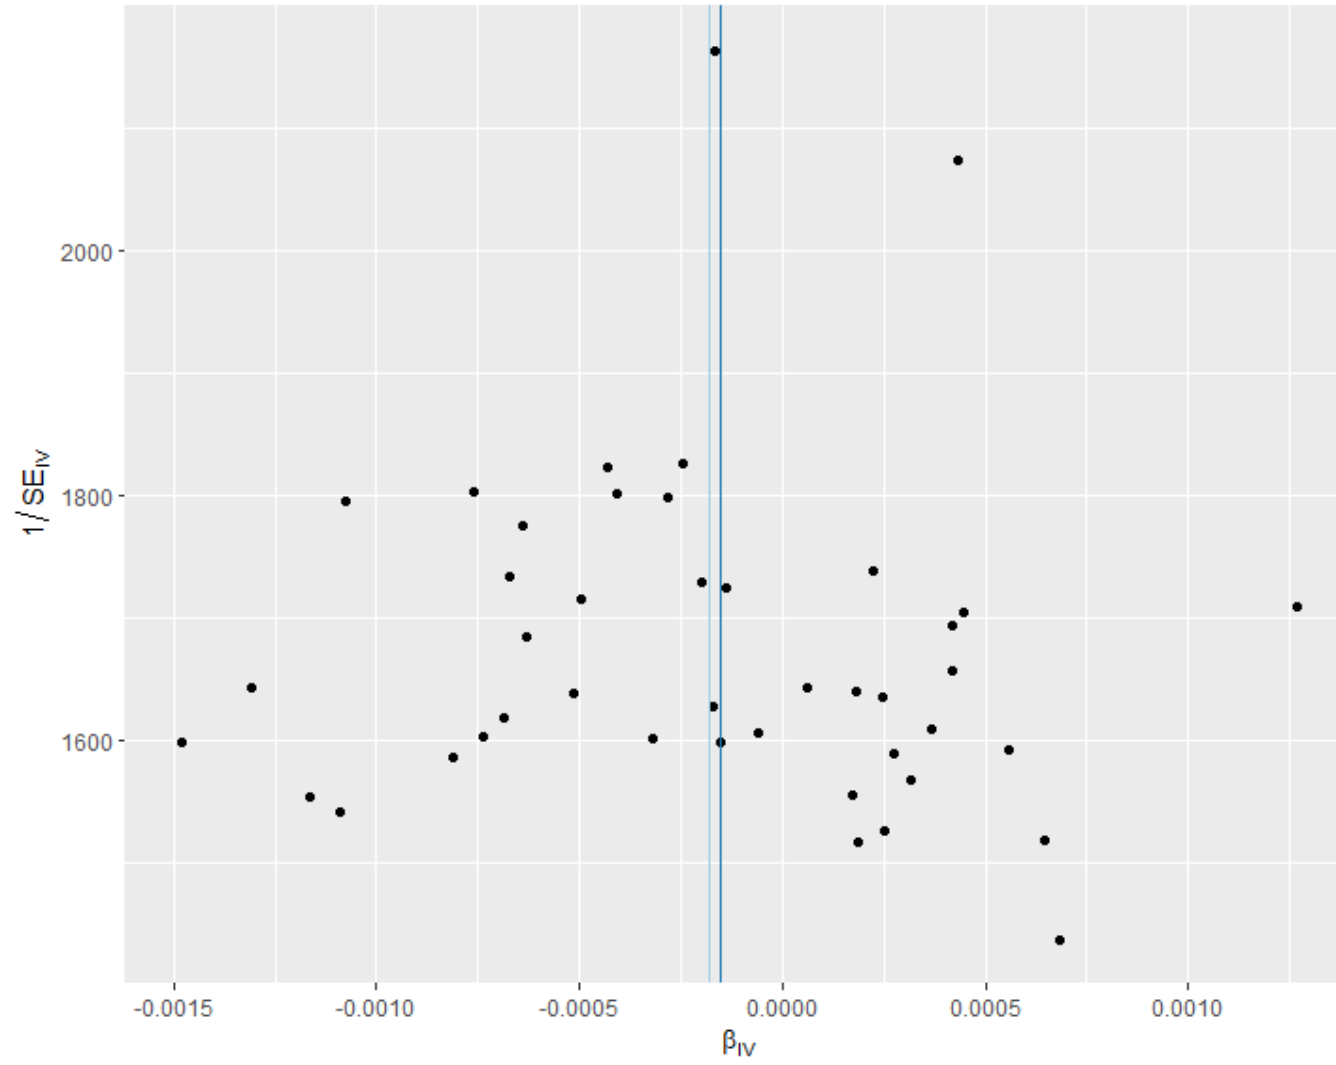

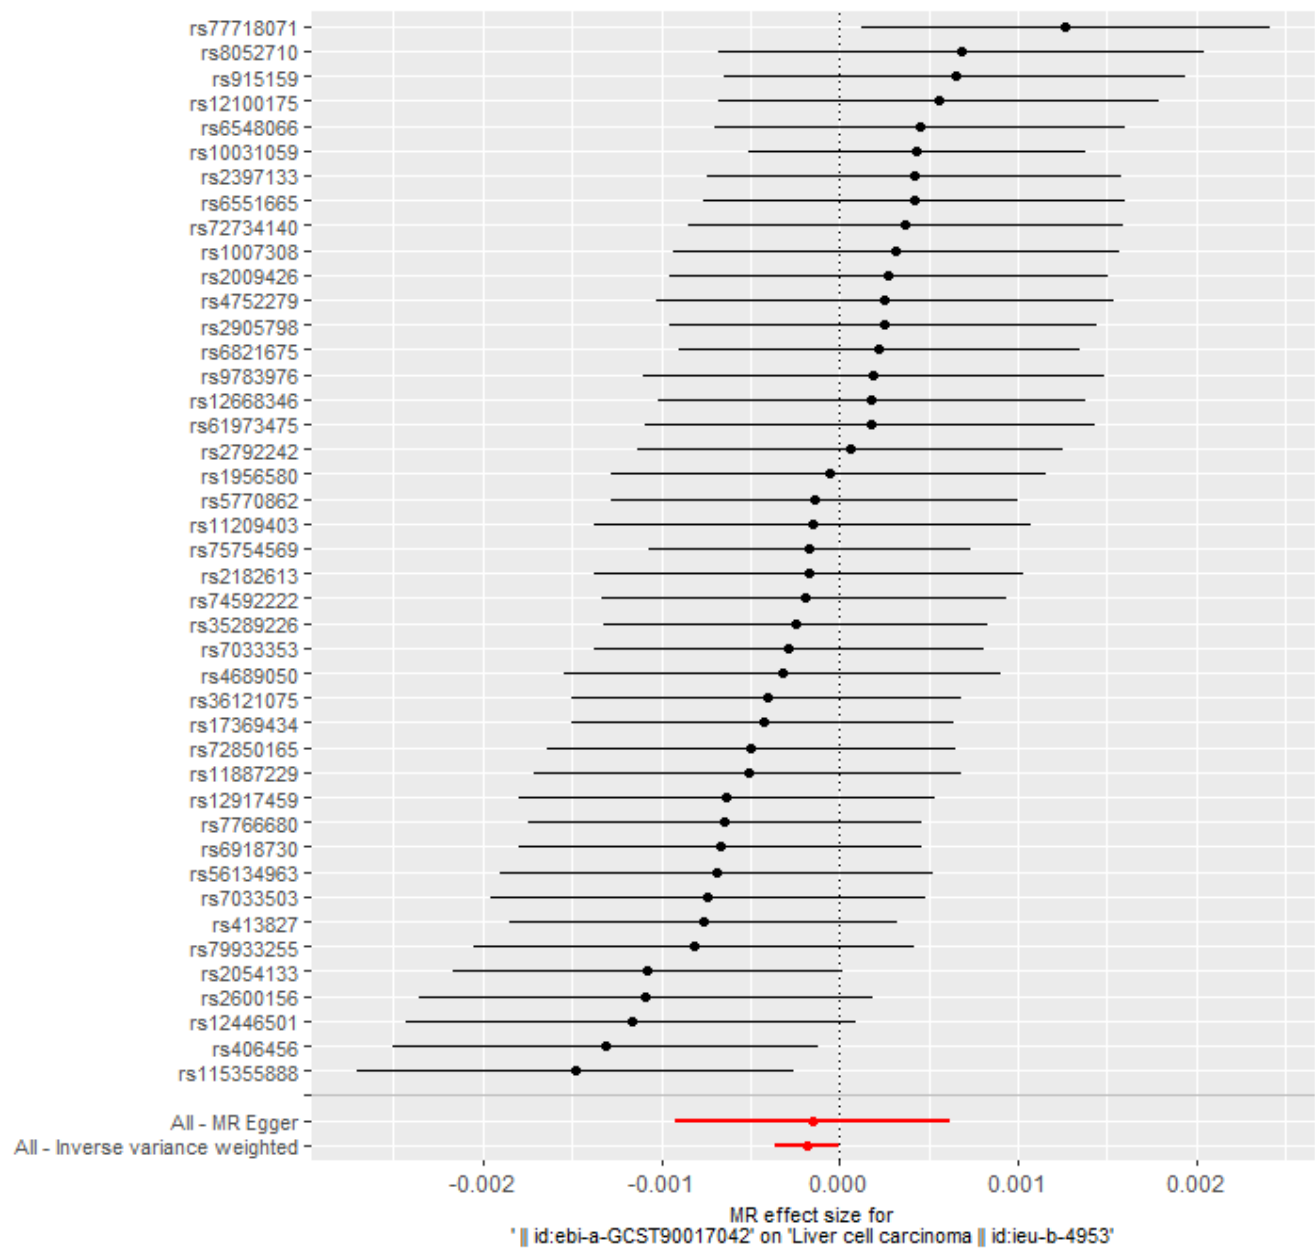

MR Test

- Inverse variance weighted
- MR Egger
- Simple mode
- Weighted median
- Weighted mode

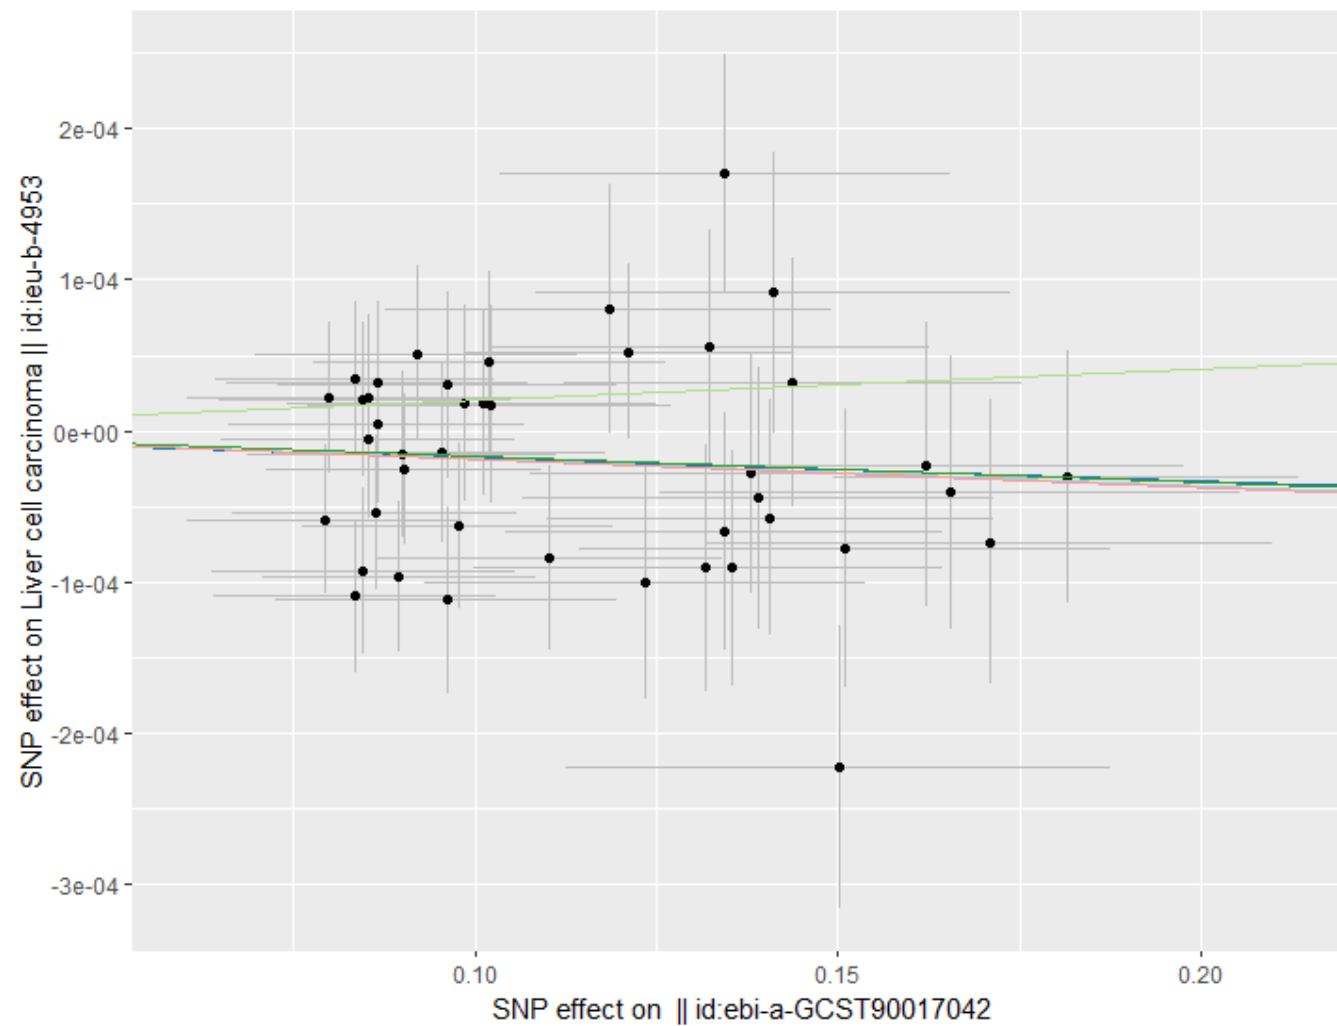

**Figure 188** Leave-one-out analysis, funnel plot, MR effect size and scatter plot for gut microbiota abundance (genus Phascolarctobacterium id.2168) on liver cell carcinoma

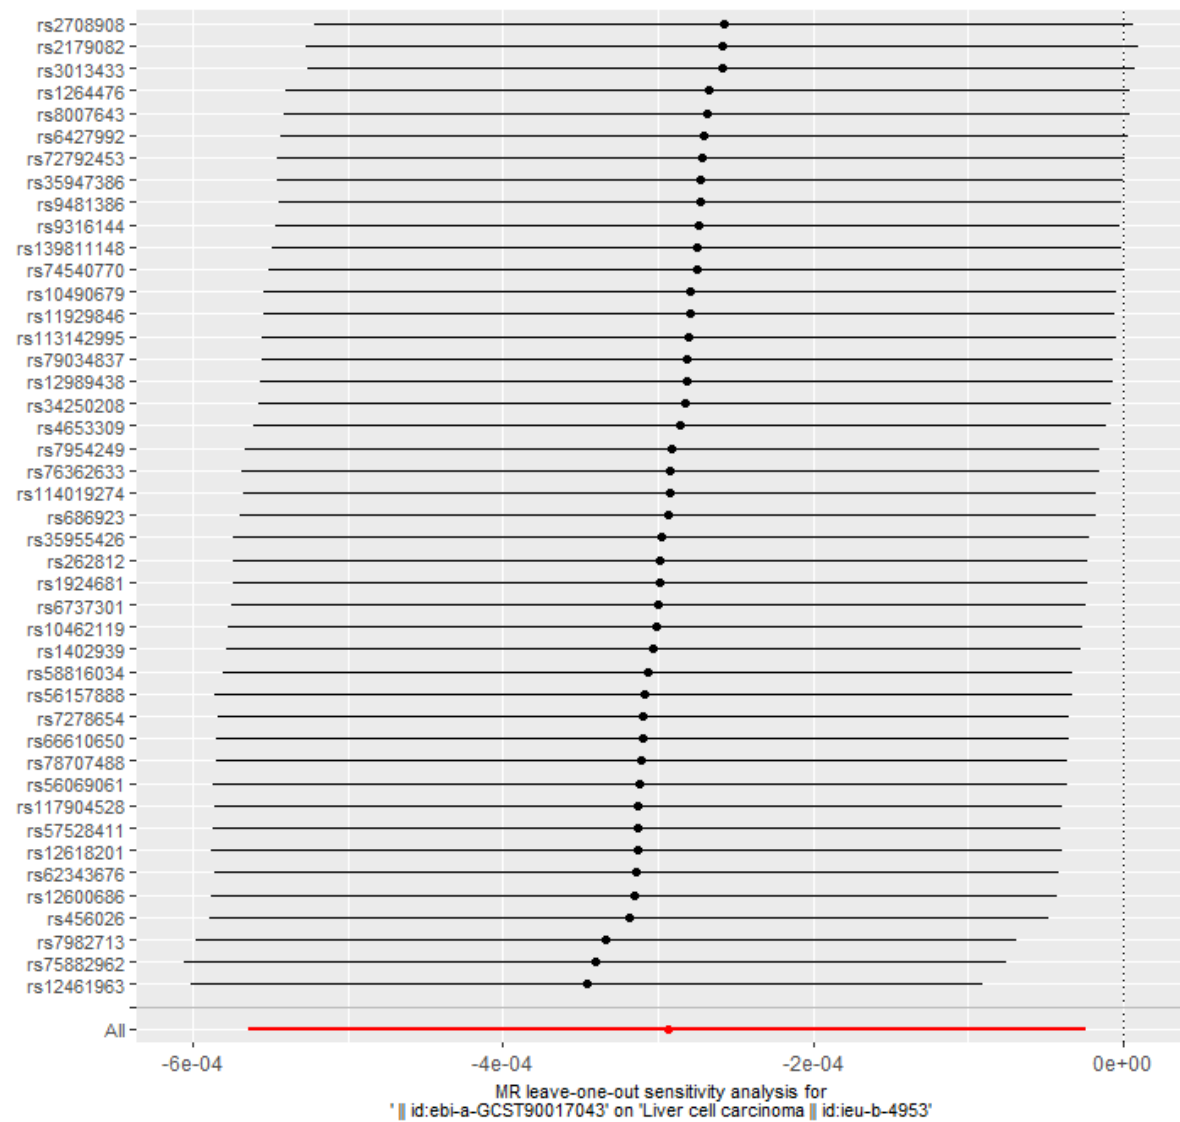

MR Method

- Inverse variance weighted
- MR Egger

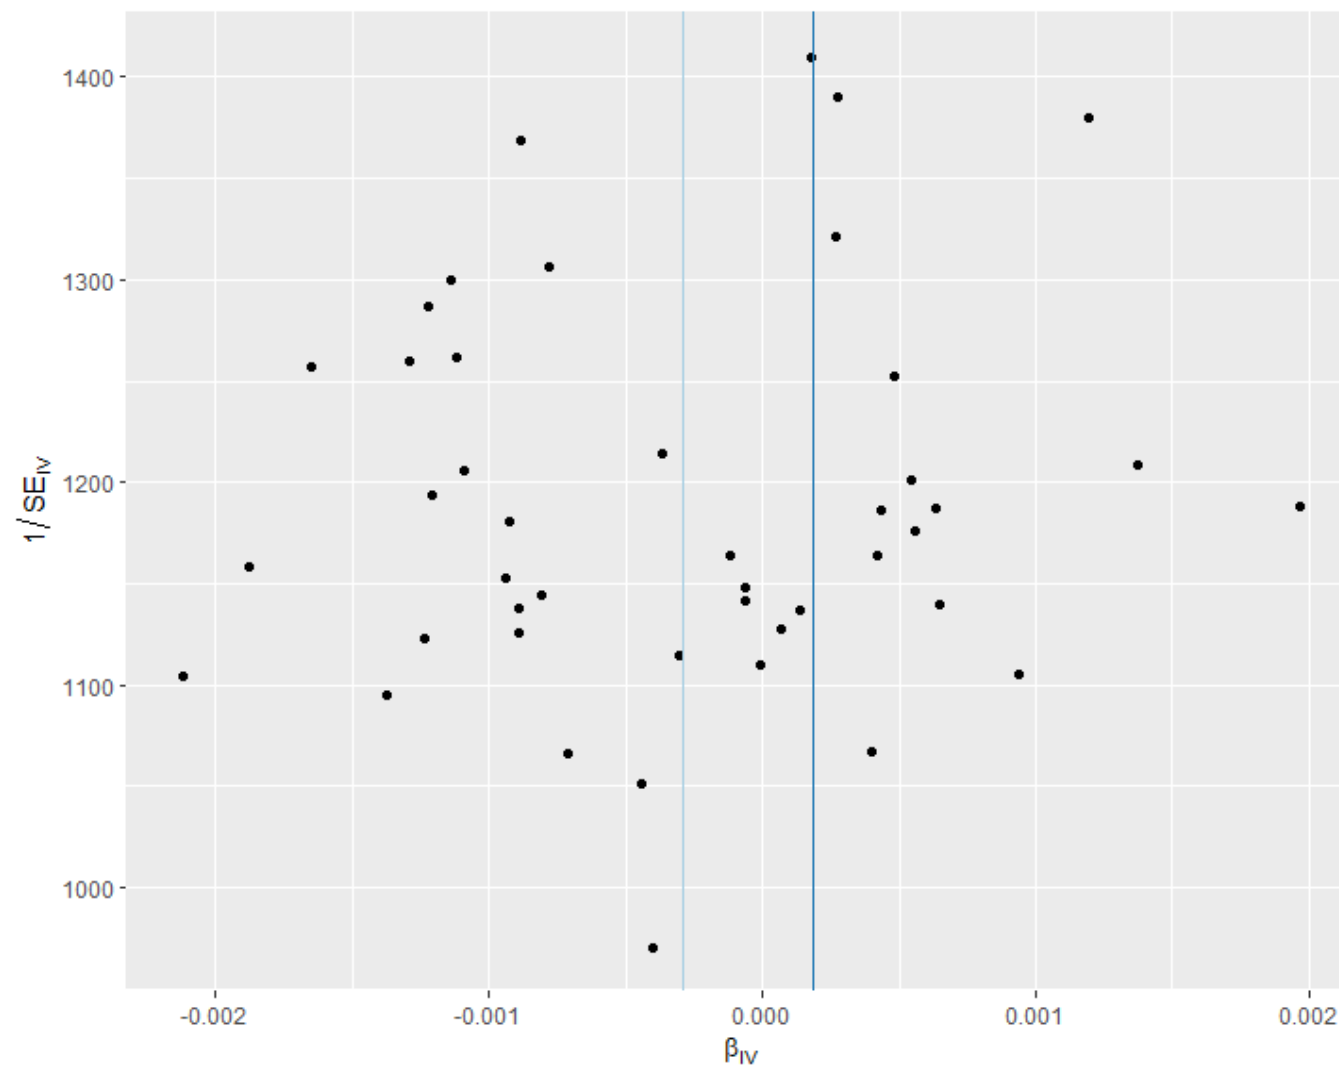

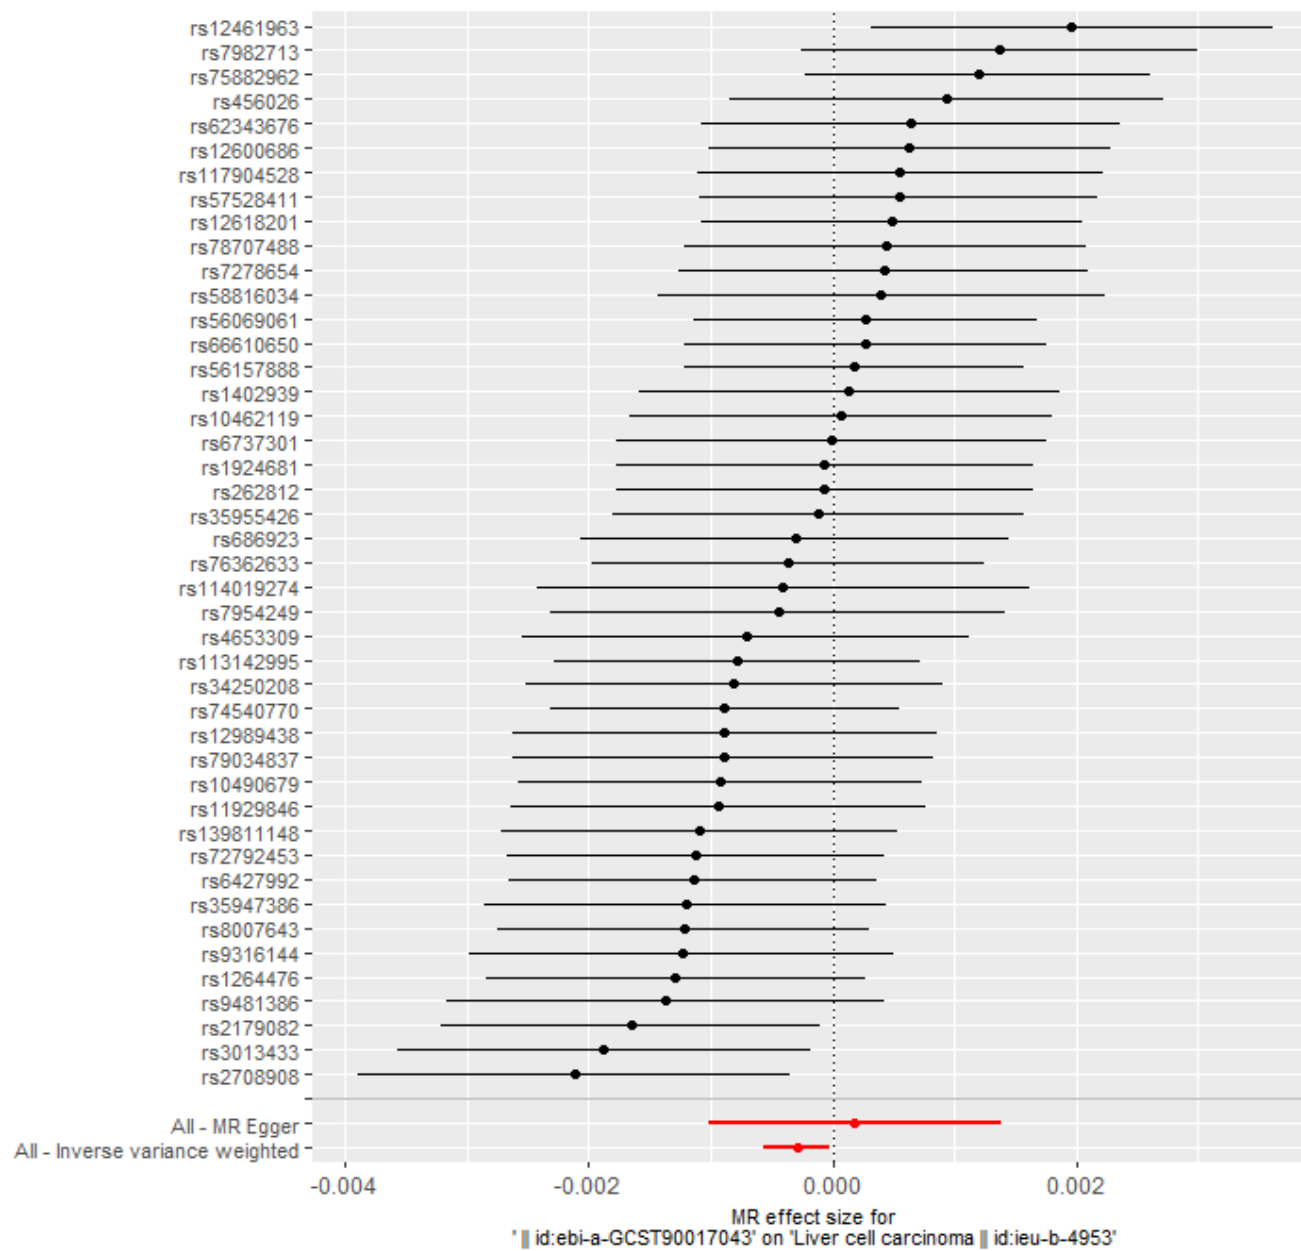

MR Test

- Inverse variance weighted
- MR Egger
- Simple mode
- Weighted median
- Weighted mode

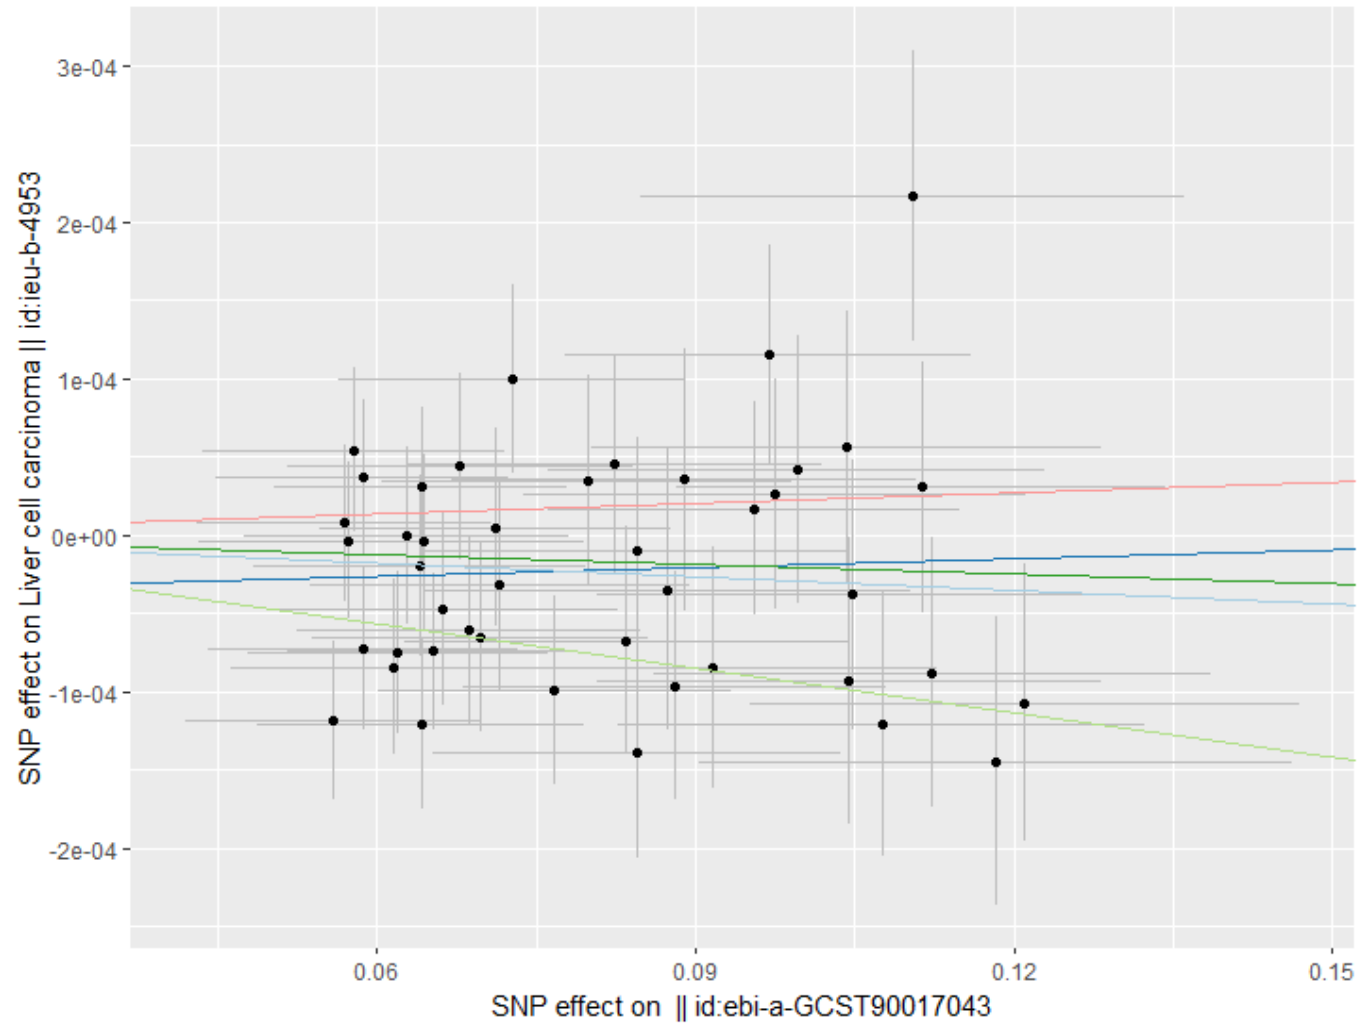



**Figure 189** Leave-one-out analysis, funnel plot, MR effect size and scatter plot for gut microbiota abundance (genus *Veillonella* id.2198) on liver cell carcinoma

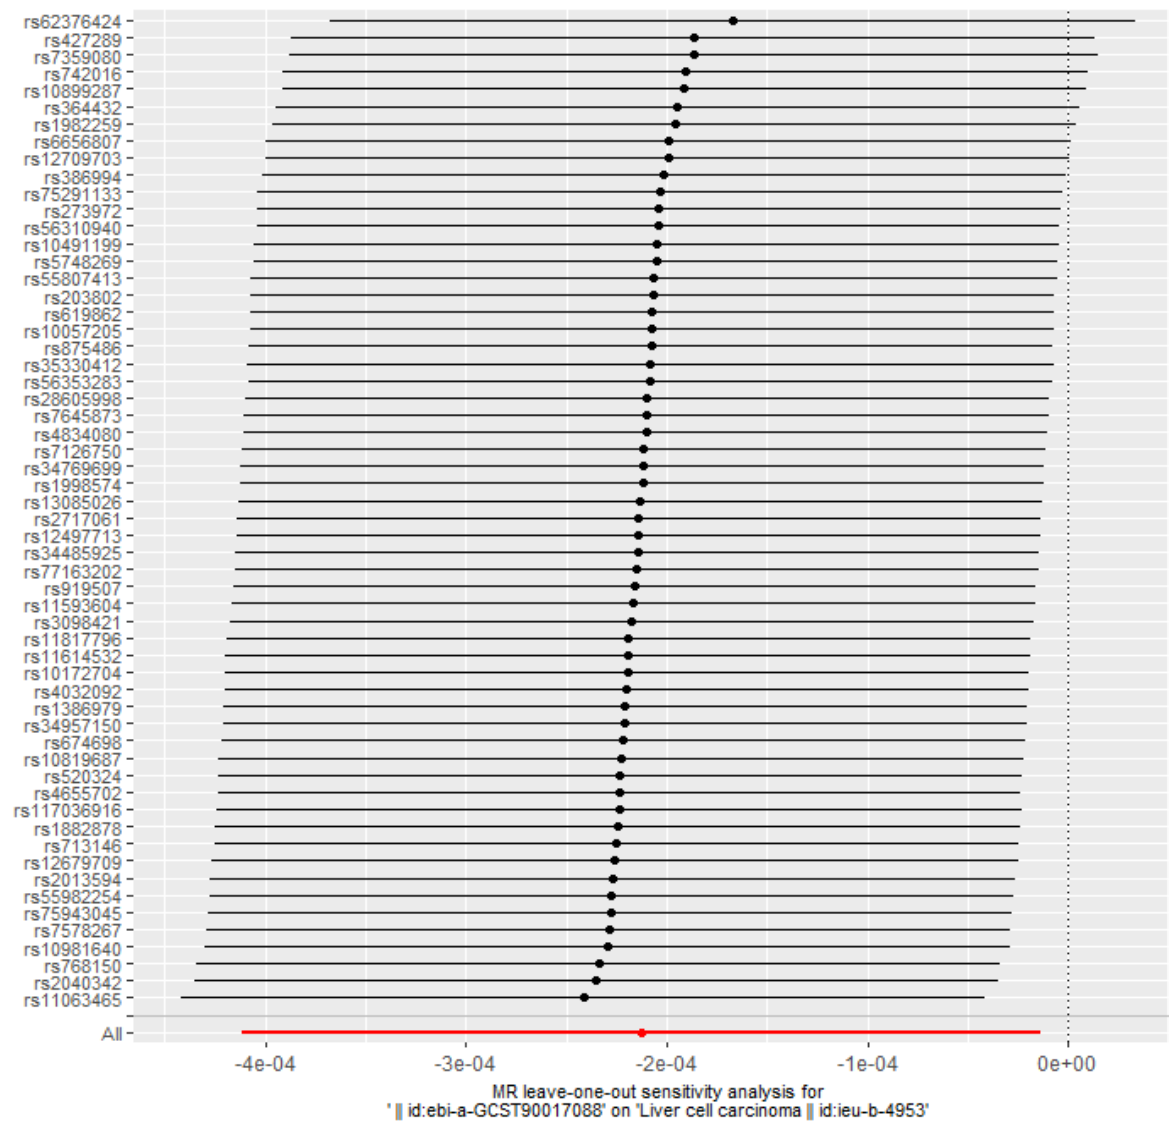

MR Method

- Inverse variance weighted
- MR Egger

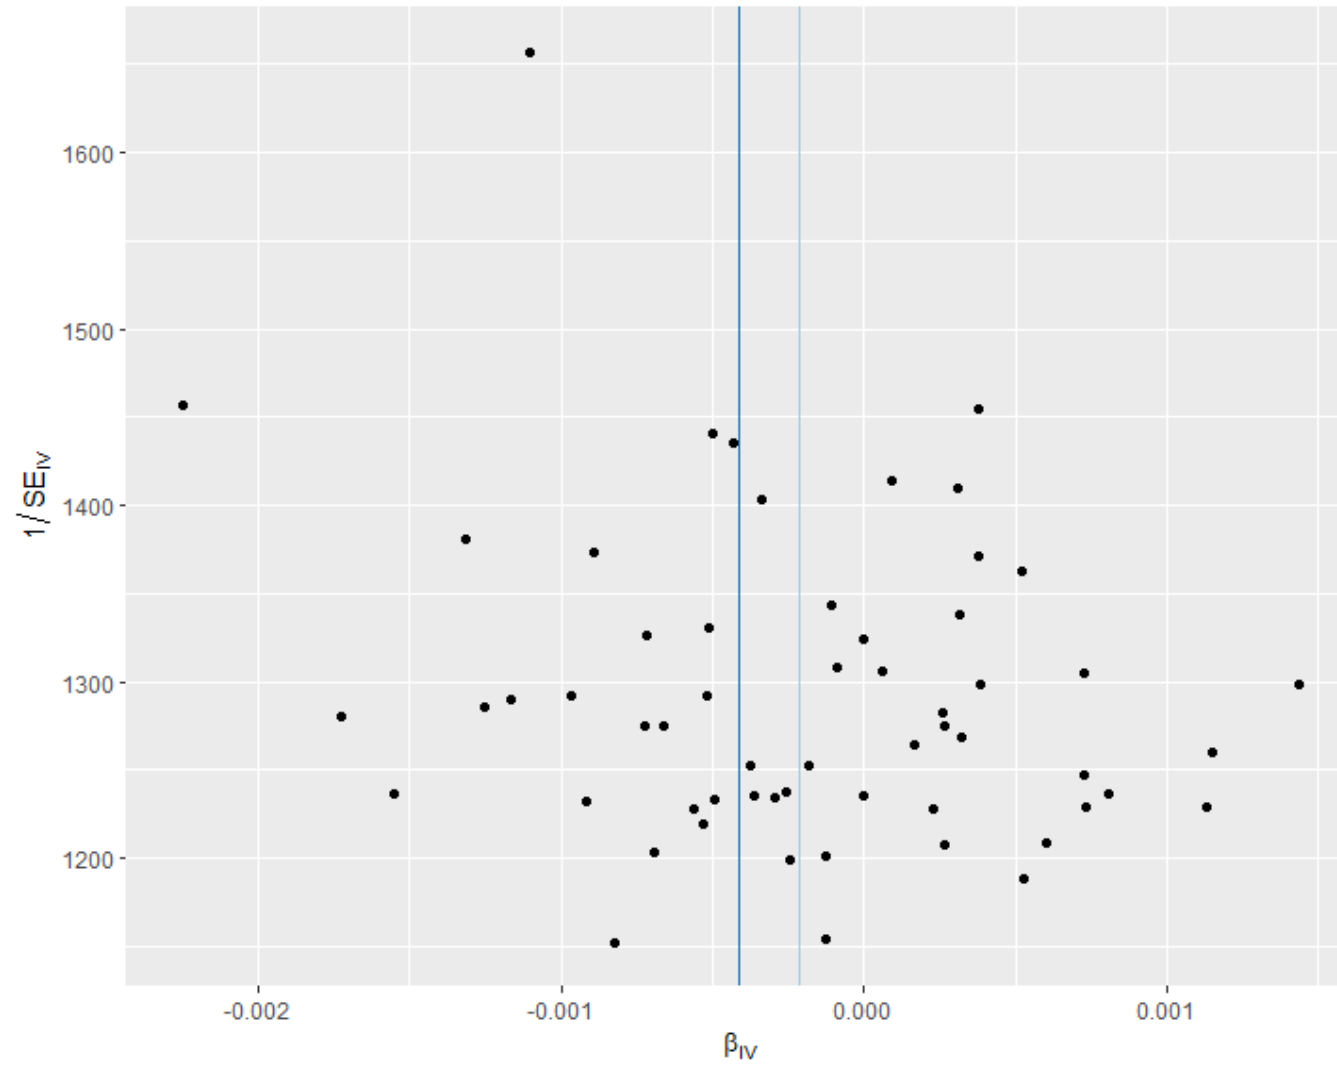

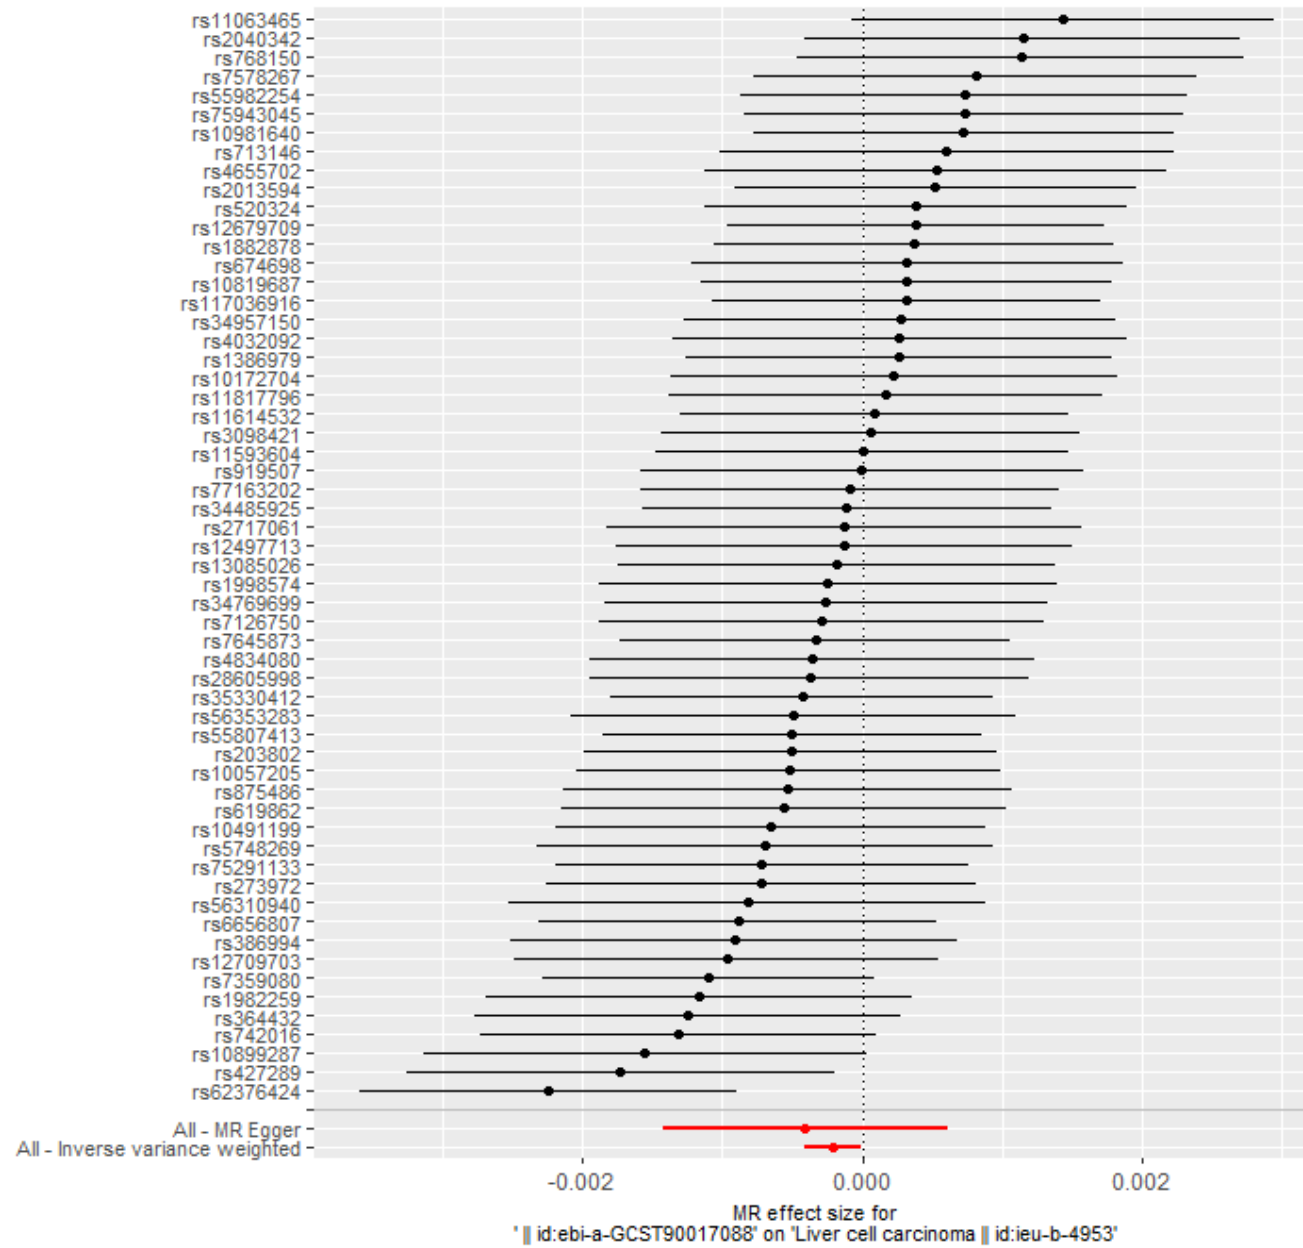

MR Test

- Inverse variance weighted
- MR Egger
- Simple mode
- Weighted median
- Weighted mode

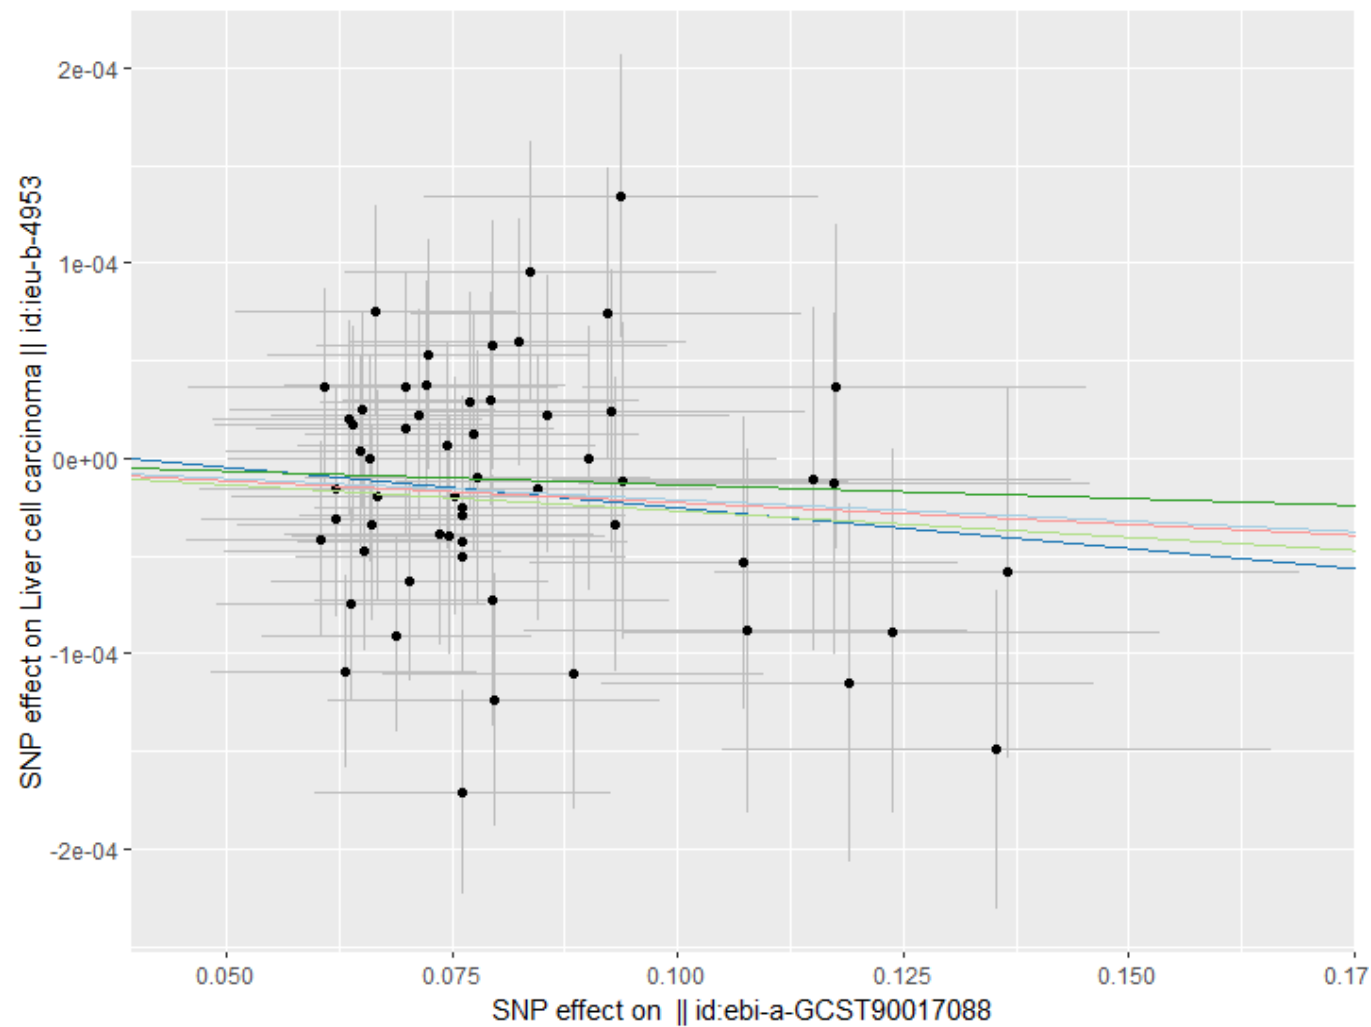

**Figure 190** Leave-one-out analysis, funnel plot, MR effect size and scatter plot for gut microbiota abundance (class Alphaproteobacteria id.2379) on cholelithiasis

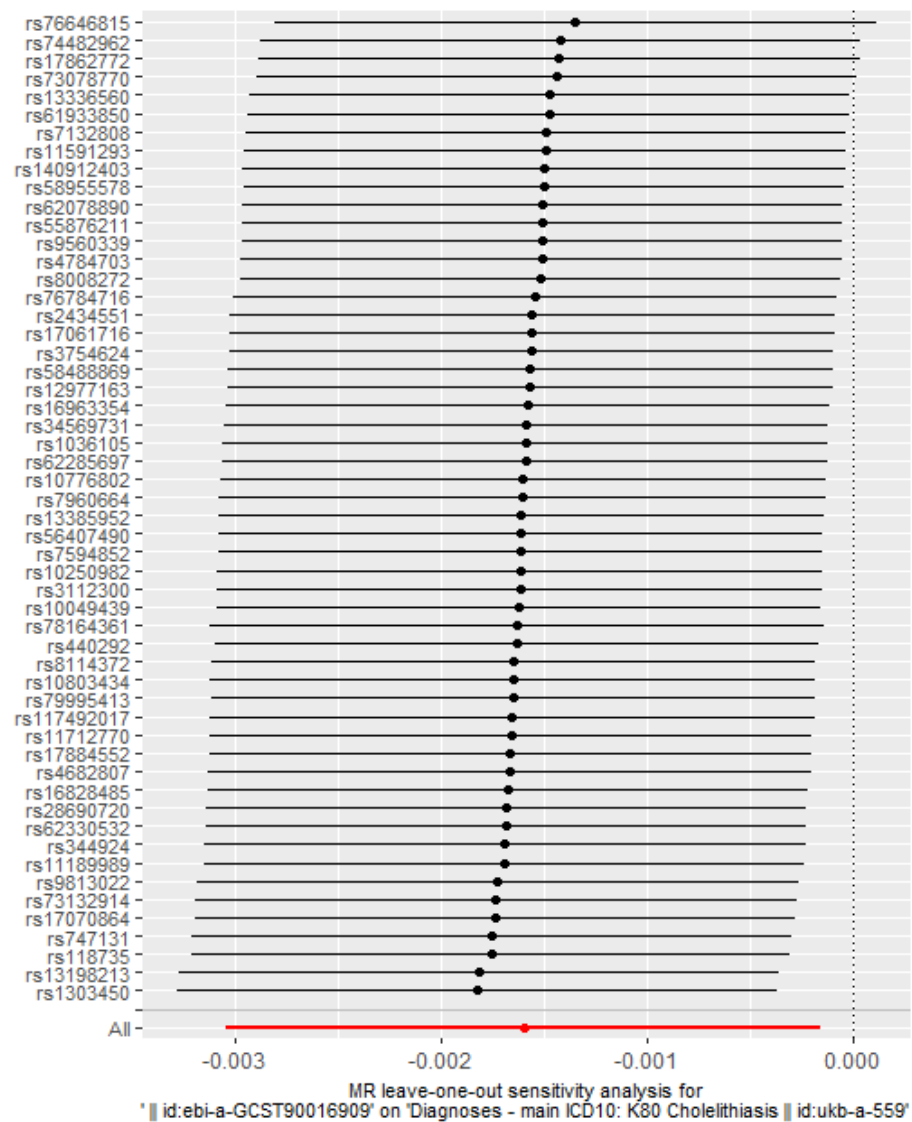

MR Method

- Inverse variance weighted
- MR Egger

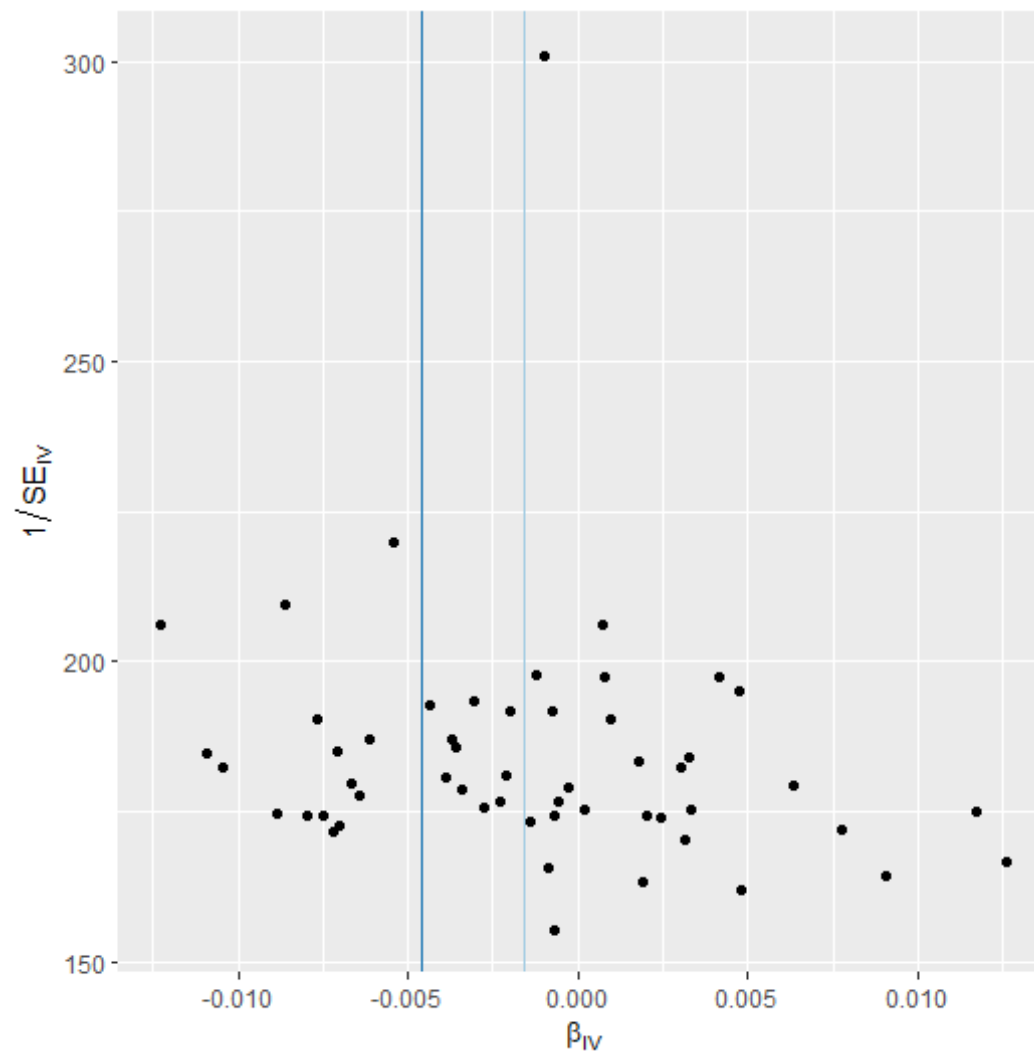

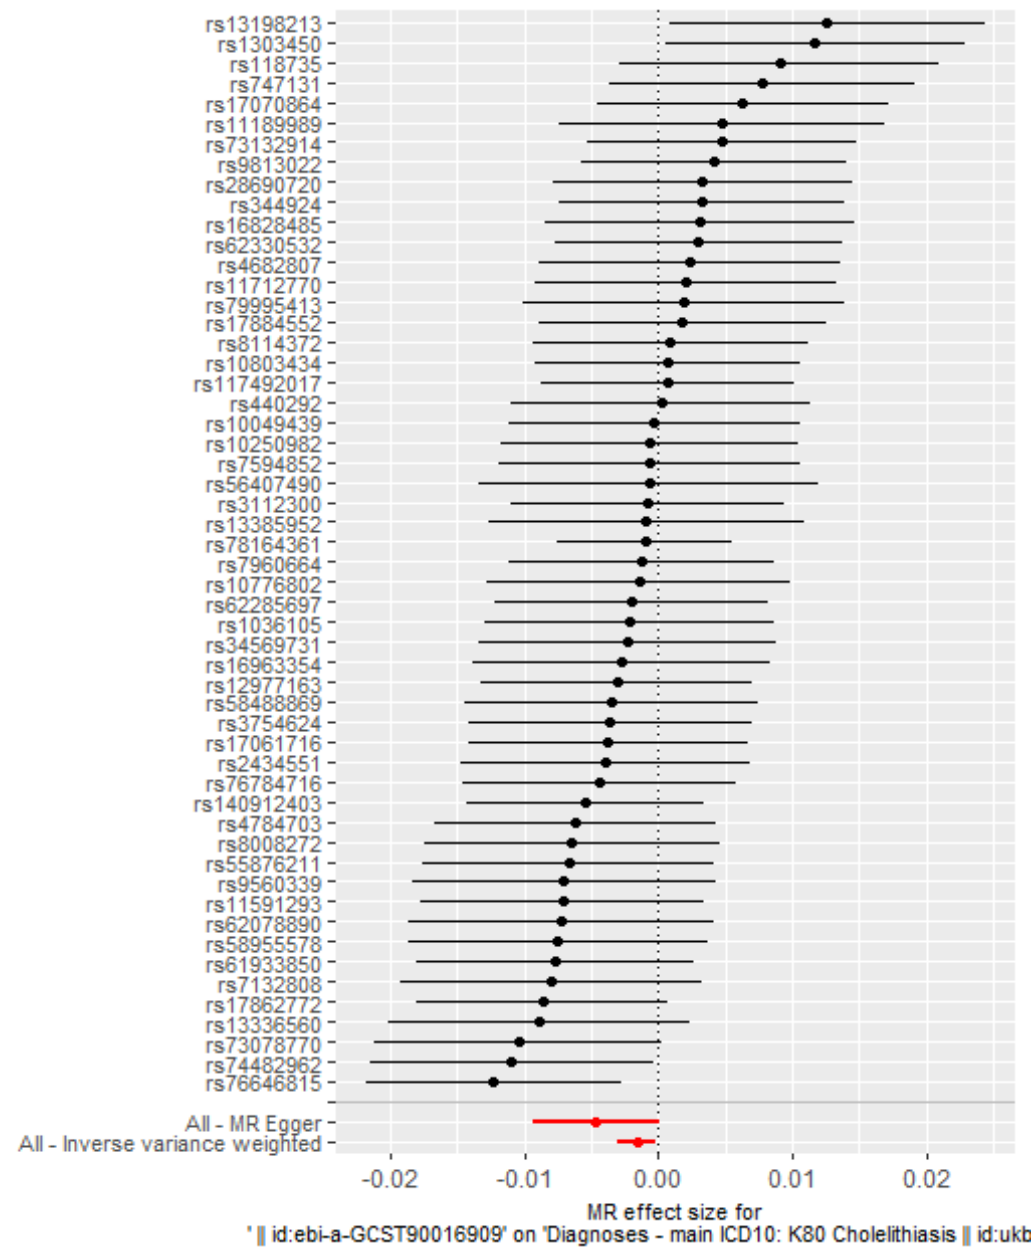

Diagnoses - main ICD10: K80 Cholelithiasis || id:ukb-a-55

### MR Test

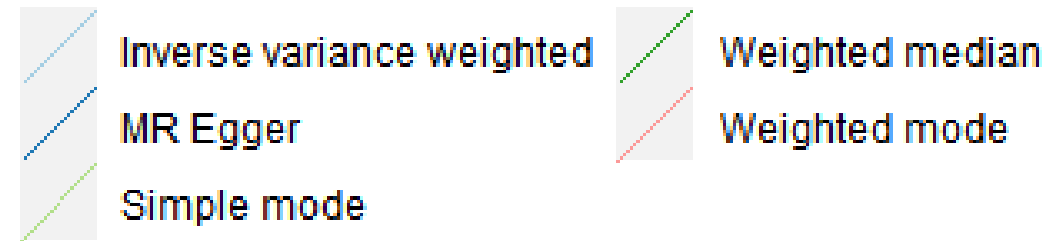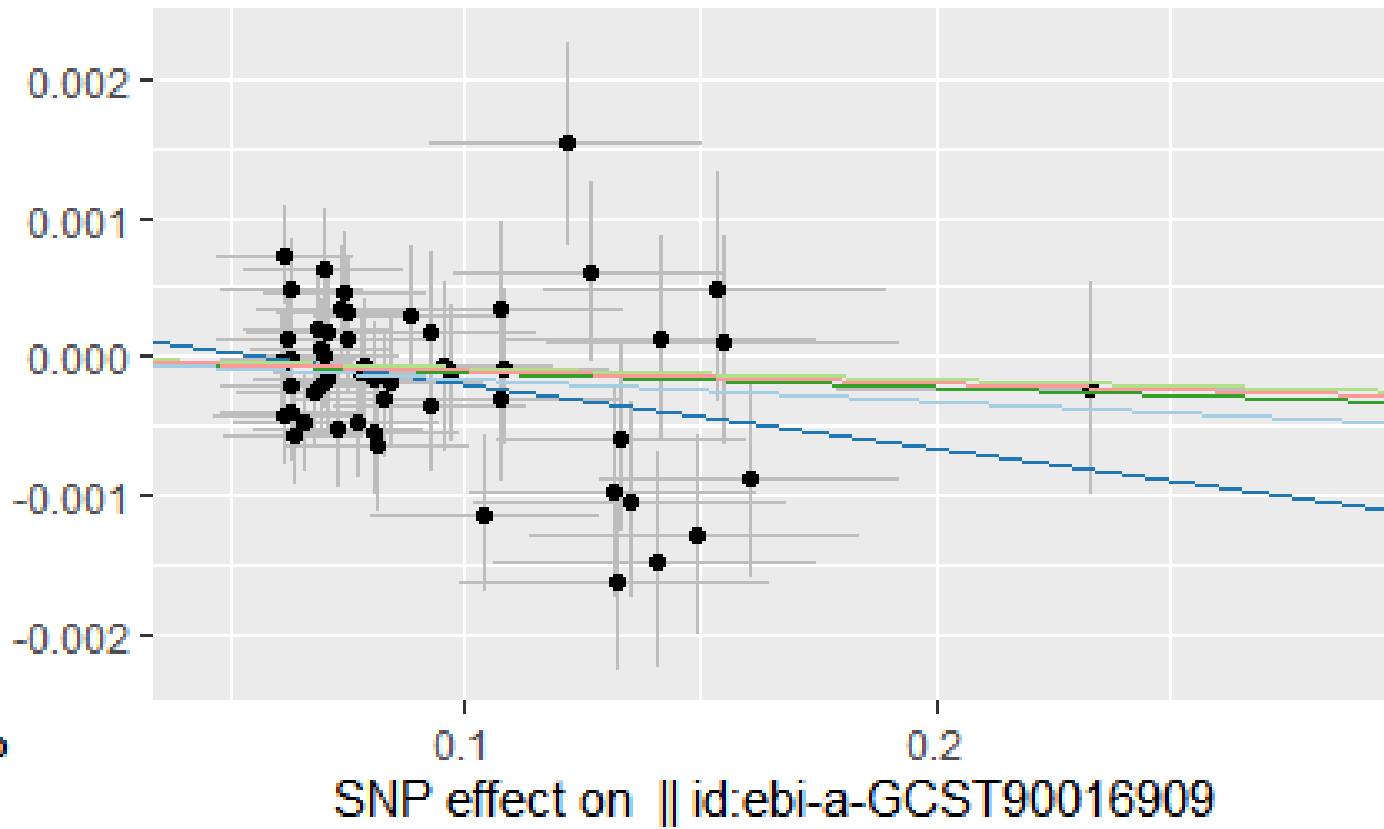



**Figure 191** Leave-one-out analysis, funnel plot, MR effect size and scatter plot for gut microbiota abundance (class Negativicutes id.2164) on cholelithiasis

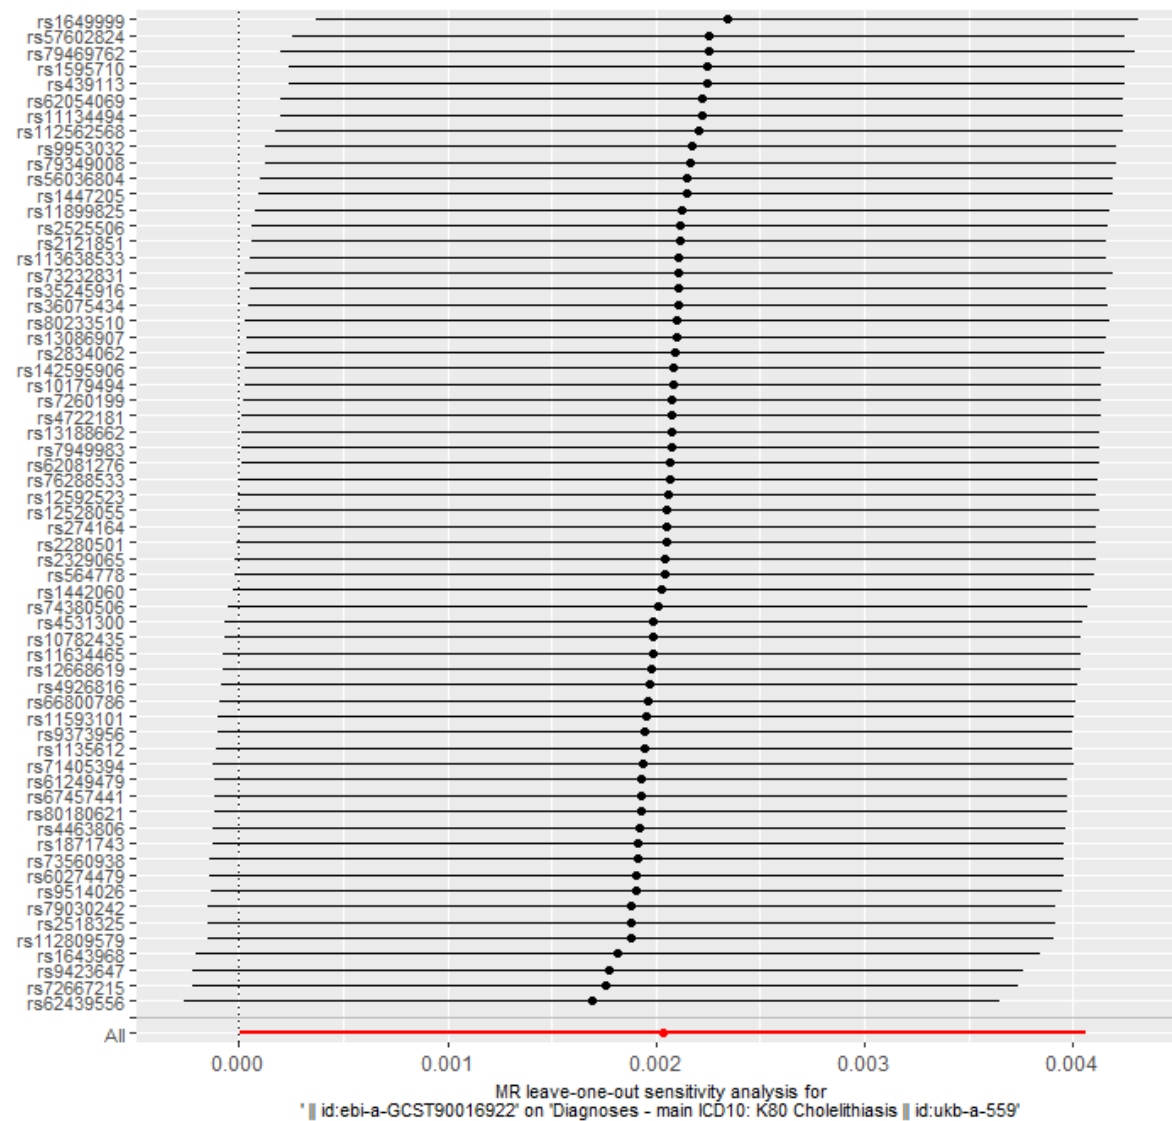

MR Method

- Inverse variance weighted
- MR Egger

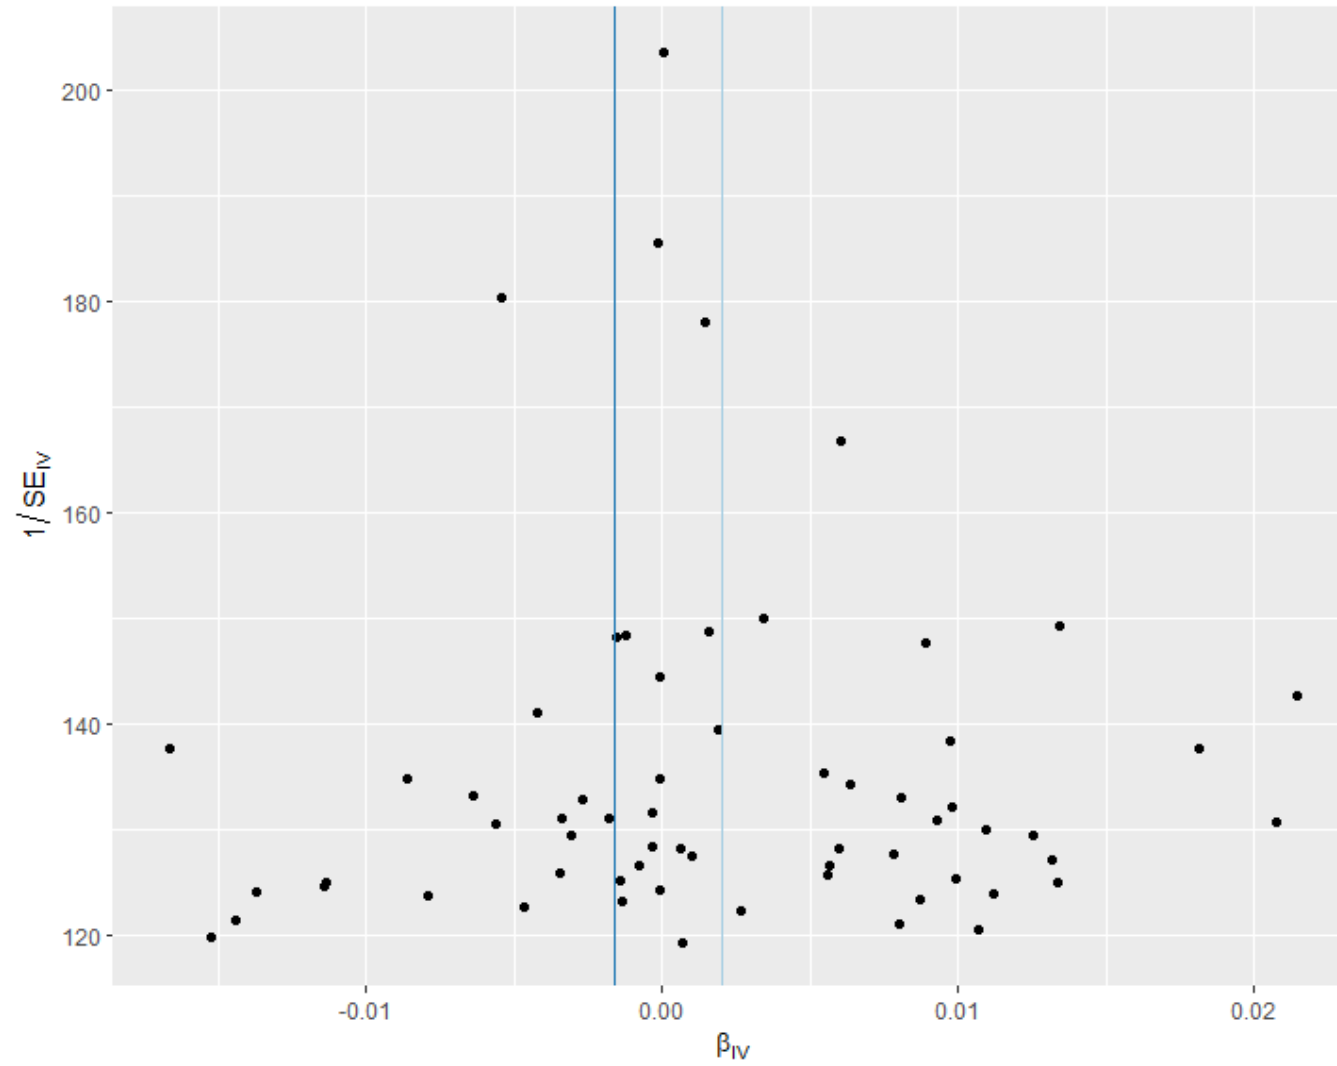

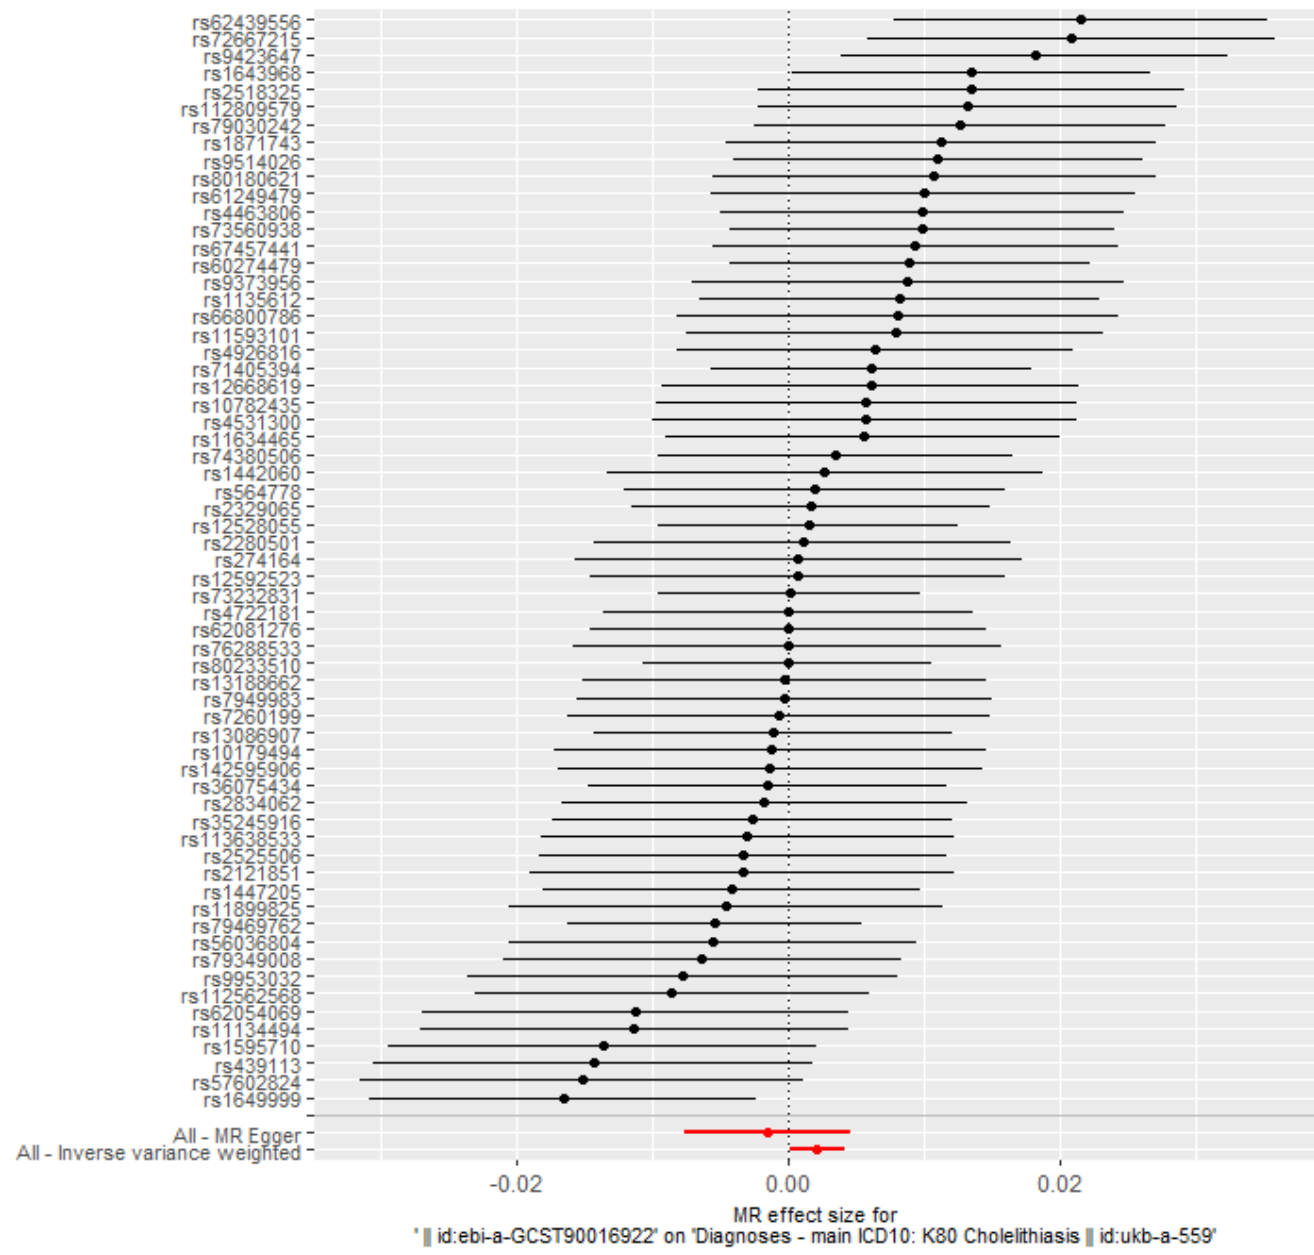

MR Test

- Inverse variance weighted
- MR Egger
- Simple mode
- Weighted median
- Weighted mode

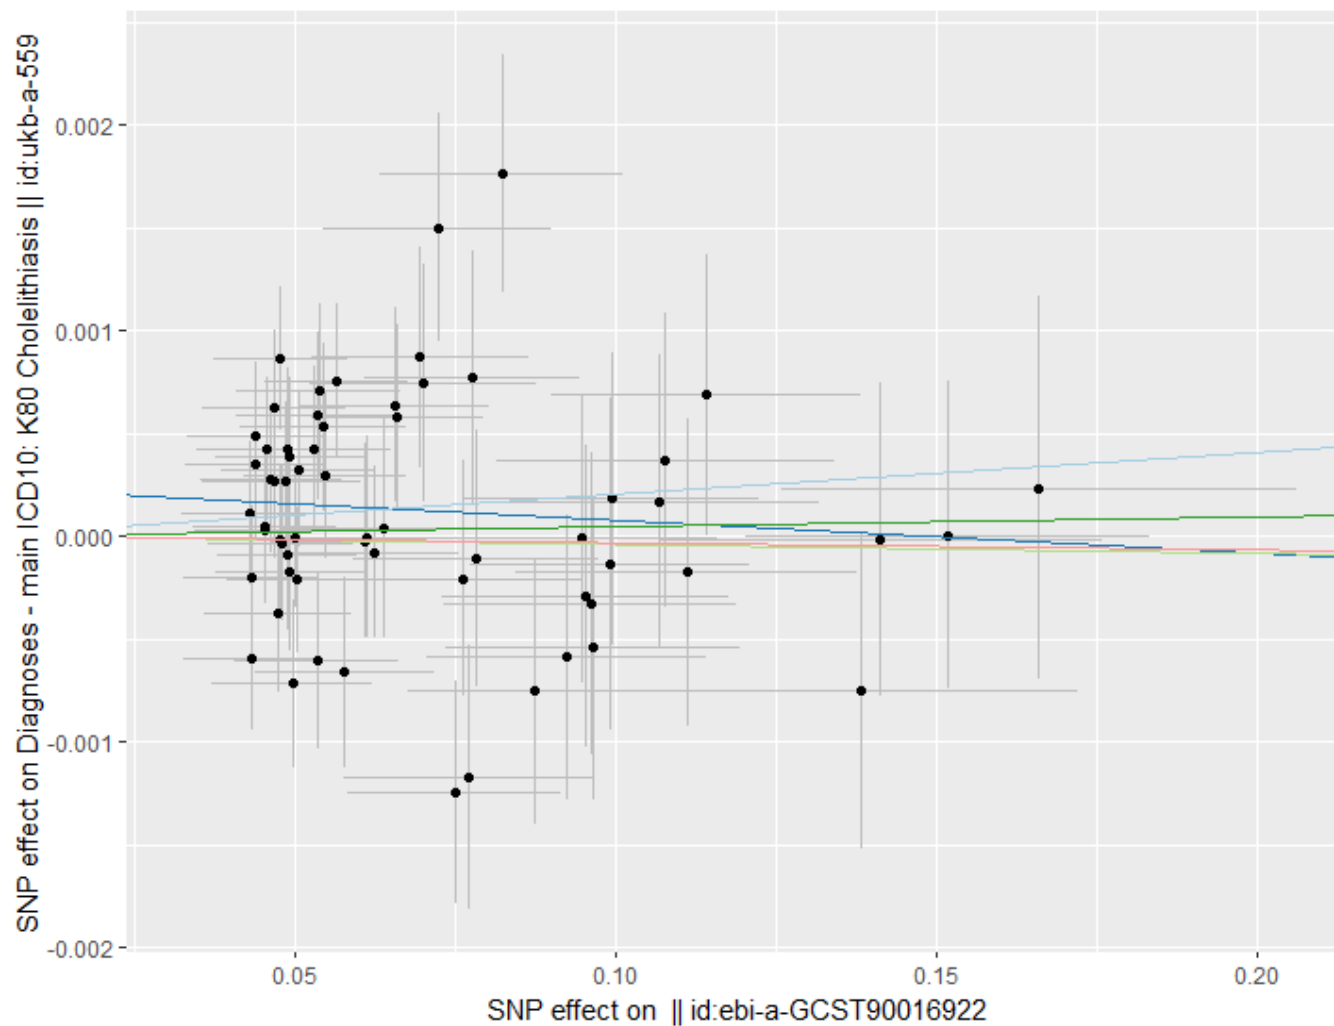

**Figure 192** Leave-one-out analysis, funnel plot, MR effect size and scatter plot for gut microbiota abundance (genus Family XIII AD3011 group id.11293) on cholelithiasis

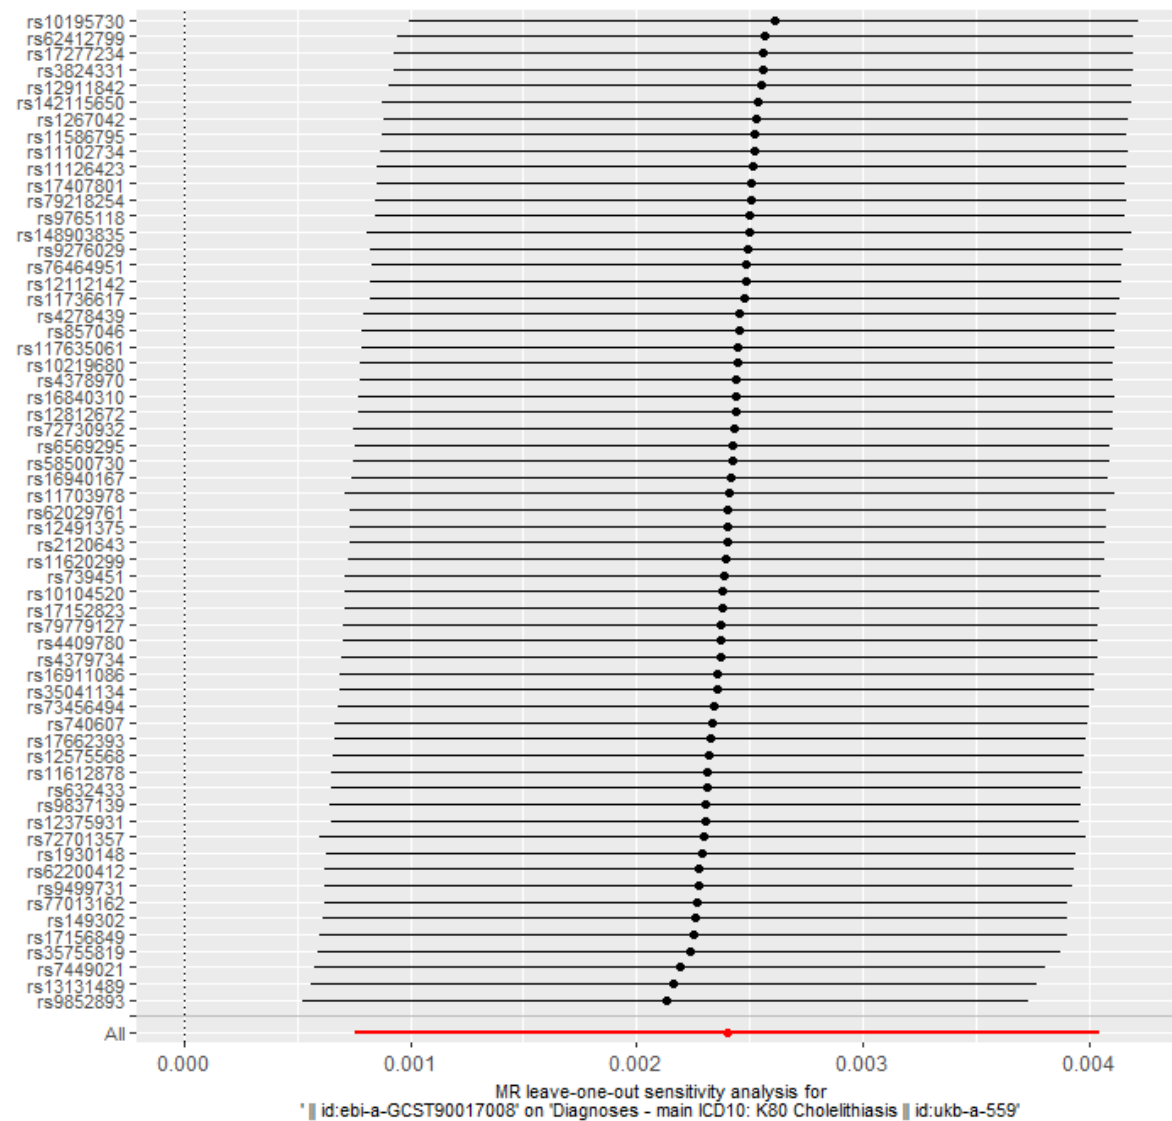

MR Method

- Inverse variance weighted
- MR Egger

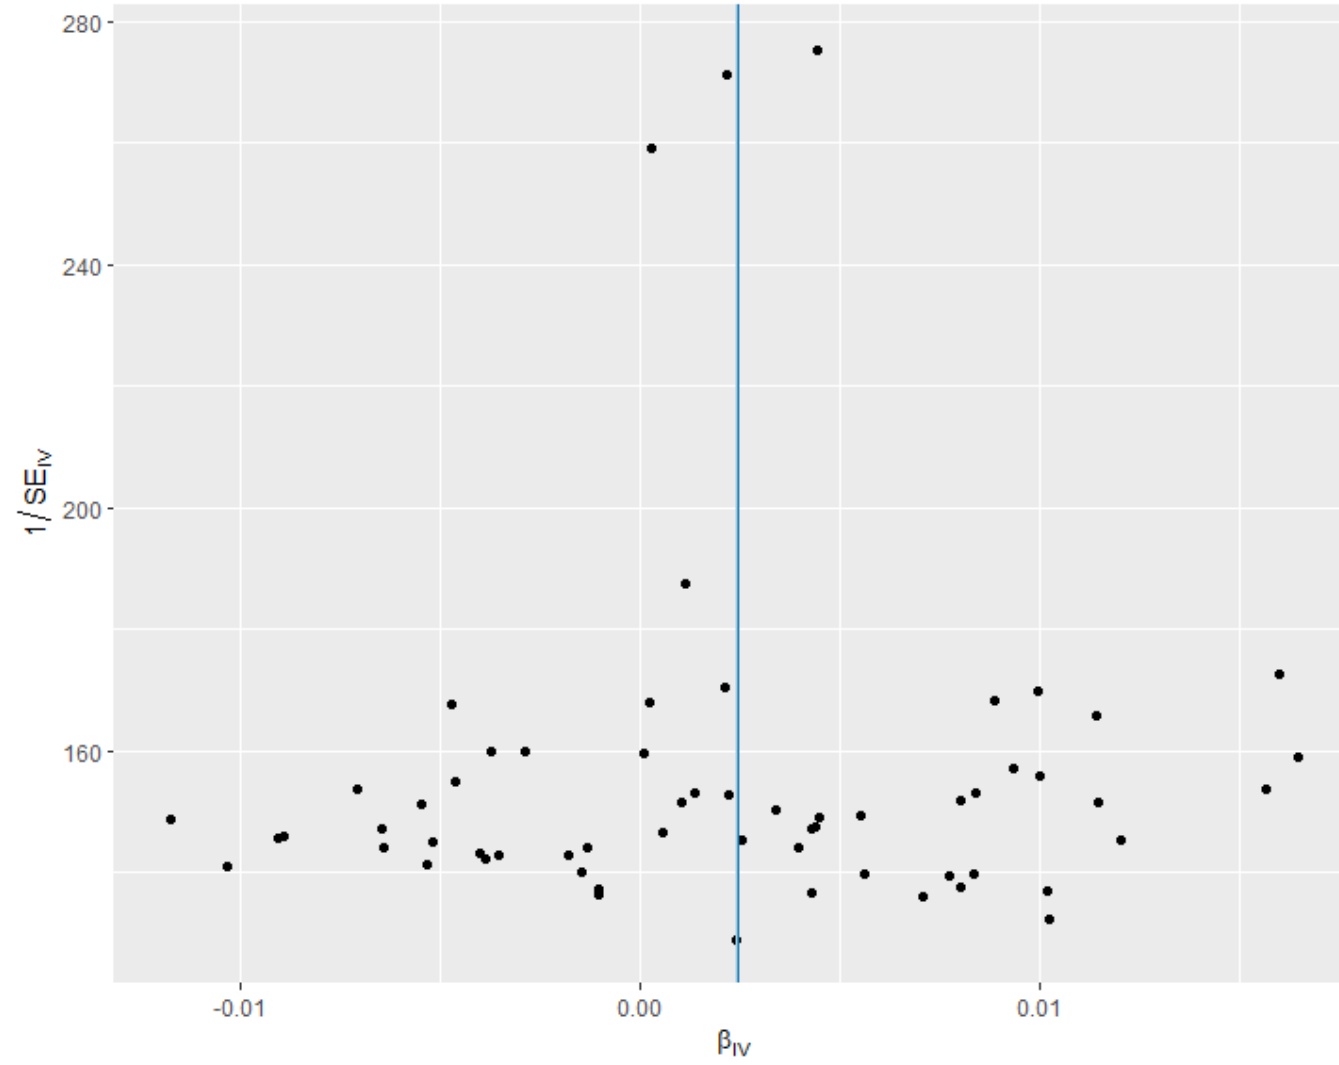

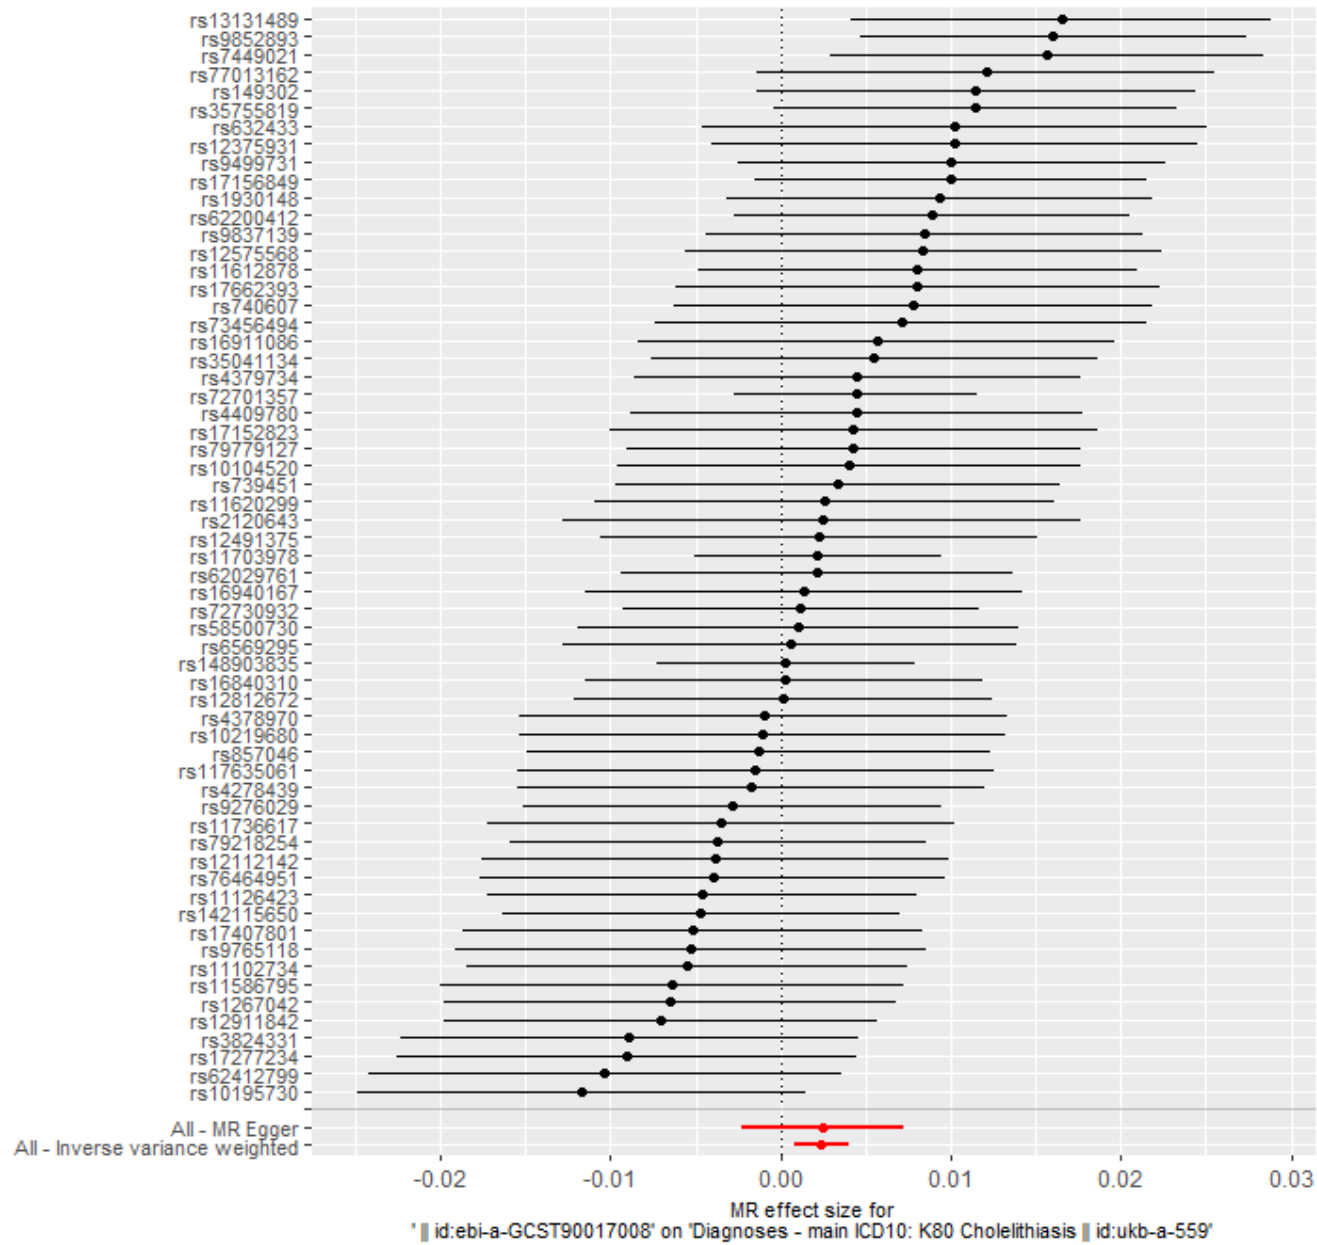

MR Test

- Inverse variance weighted
- MR Egger
- Simple mode
- Weighted median
- Weighted mode

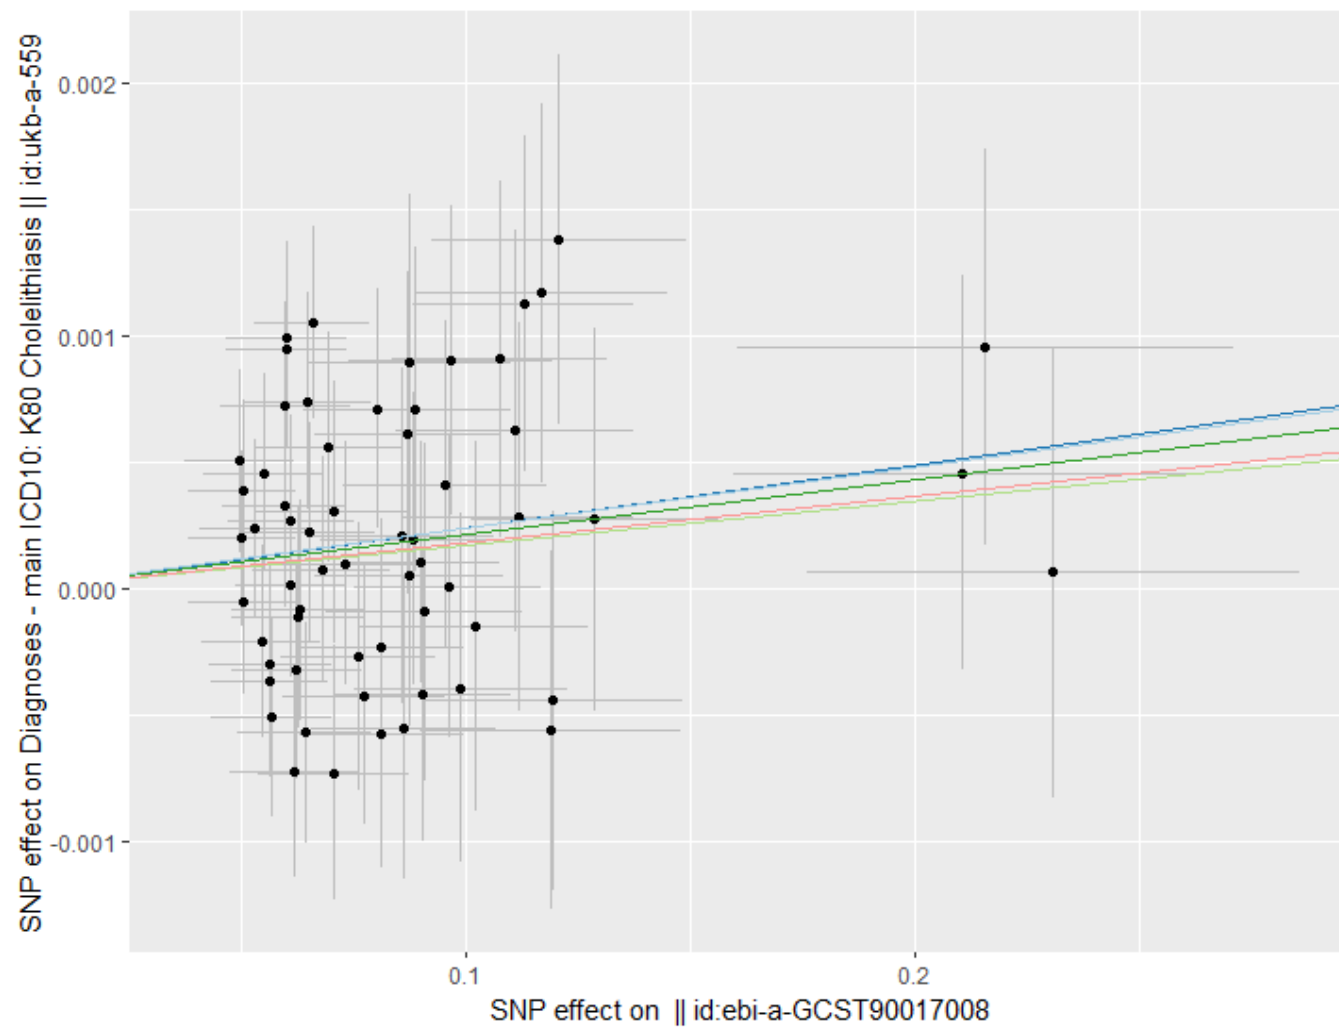



**Figure 193** Leave-one-out analysis, funnel plot, MR effect size and scatter plot for gut microbiota abundance (genus Lachnospiraceae UCG001 id.11321) on cholelithiasis

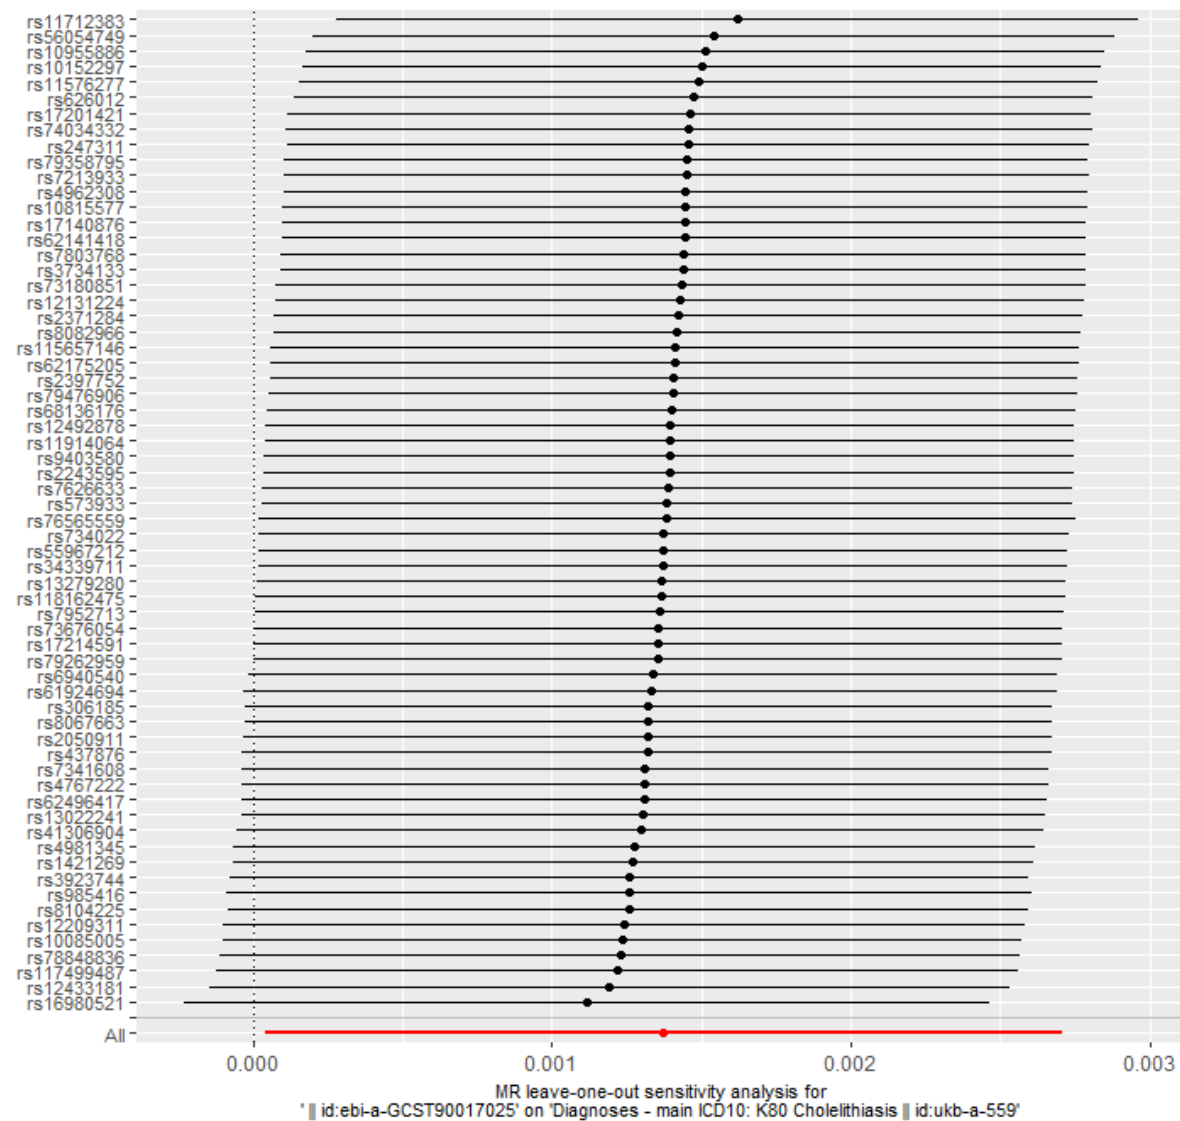

MR Method

- Inverse variance weighted
- MR Egger

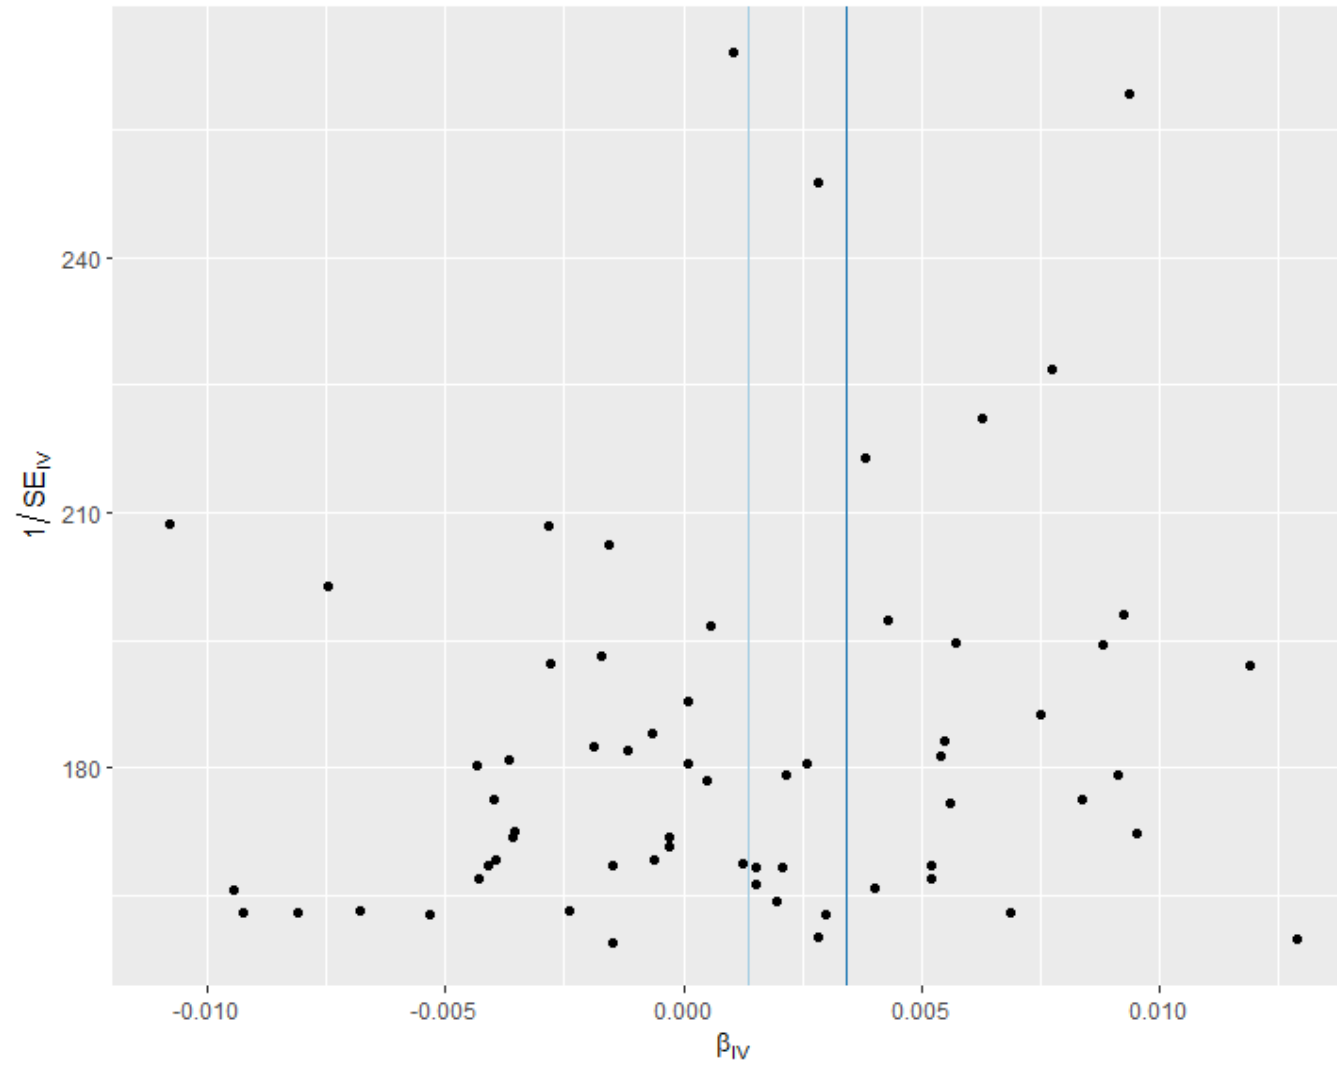

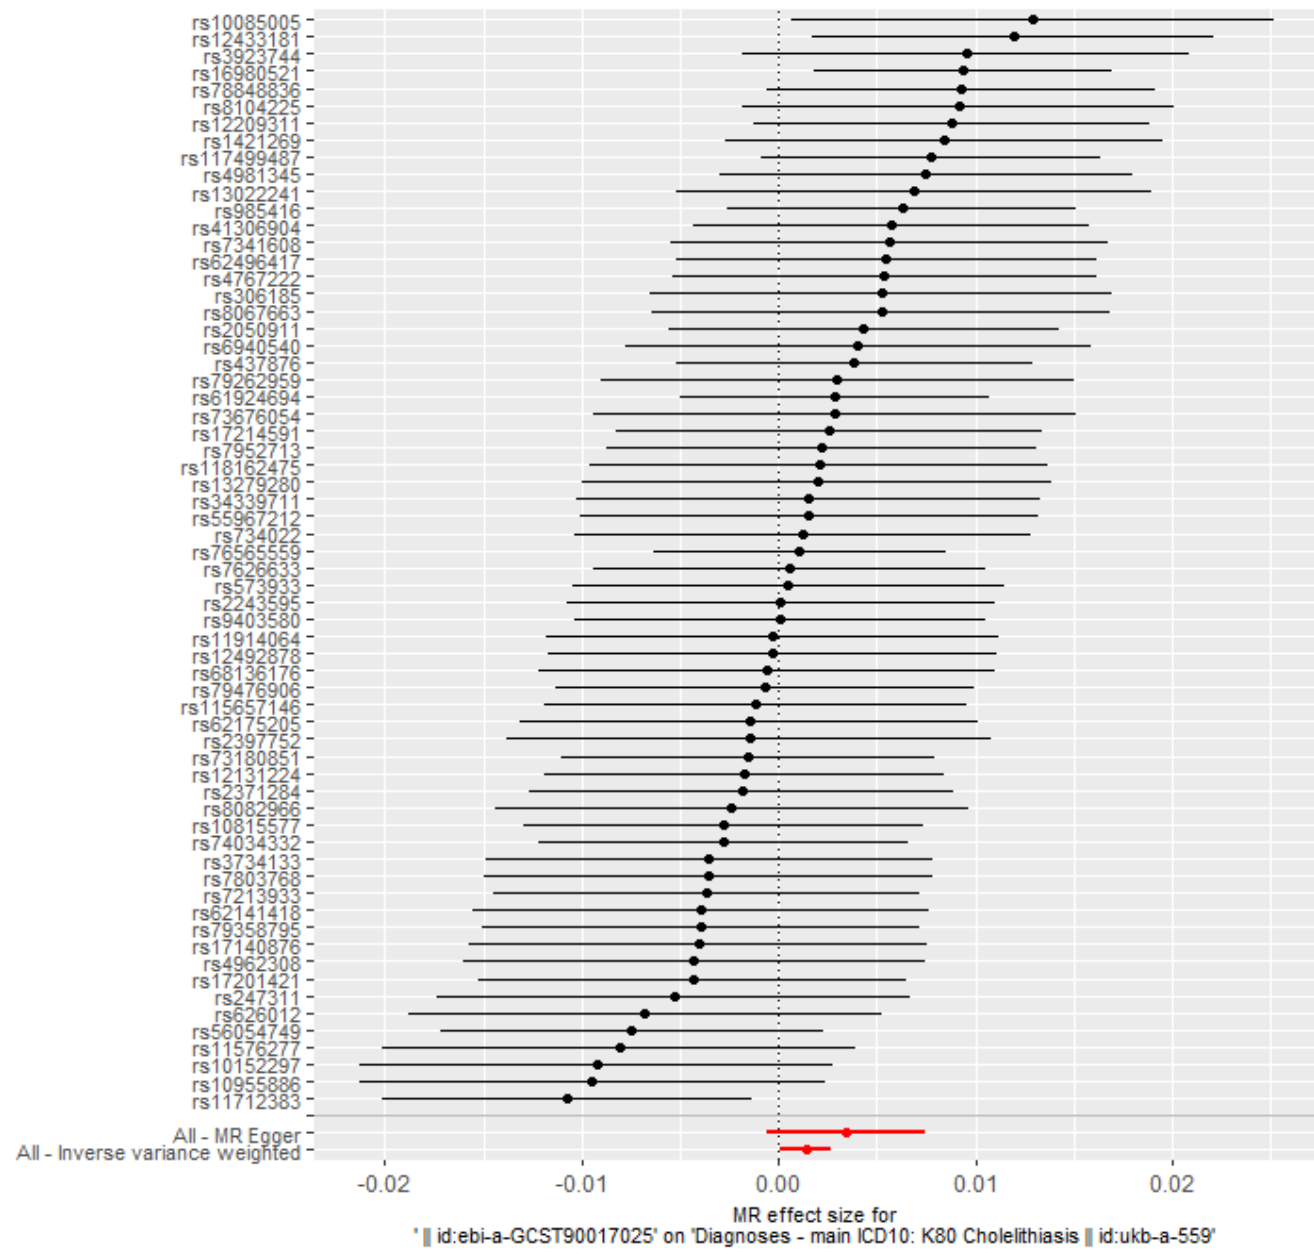

MR Test

- Inverse variance weighted
- MR Egger
- Simple mode
- Weighted median
- Weighted mode

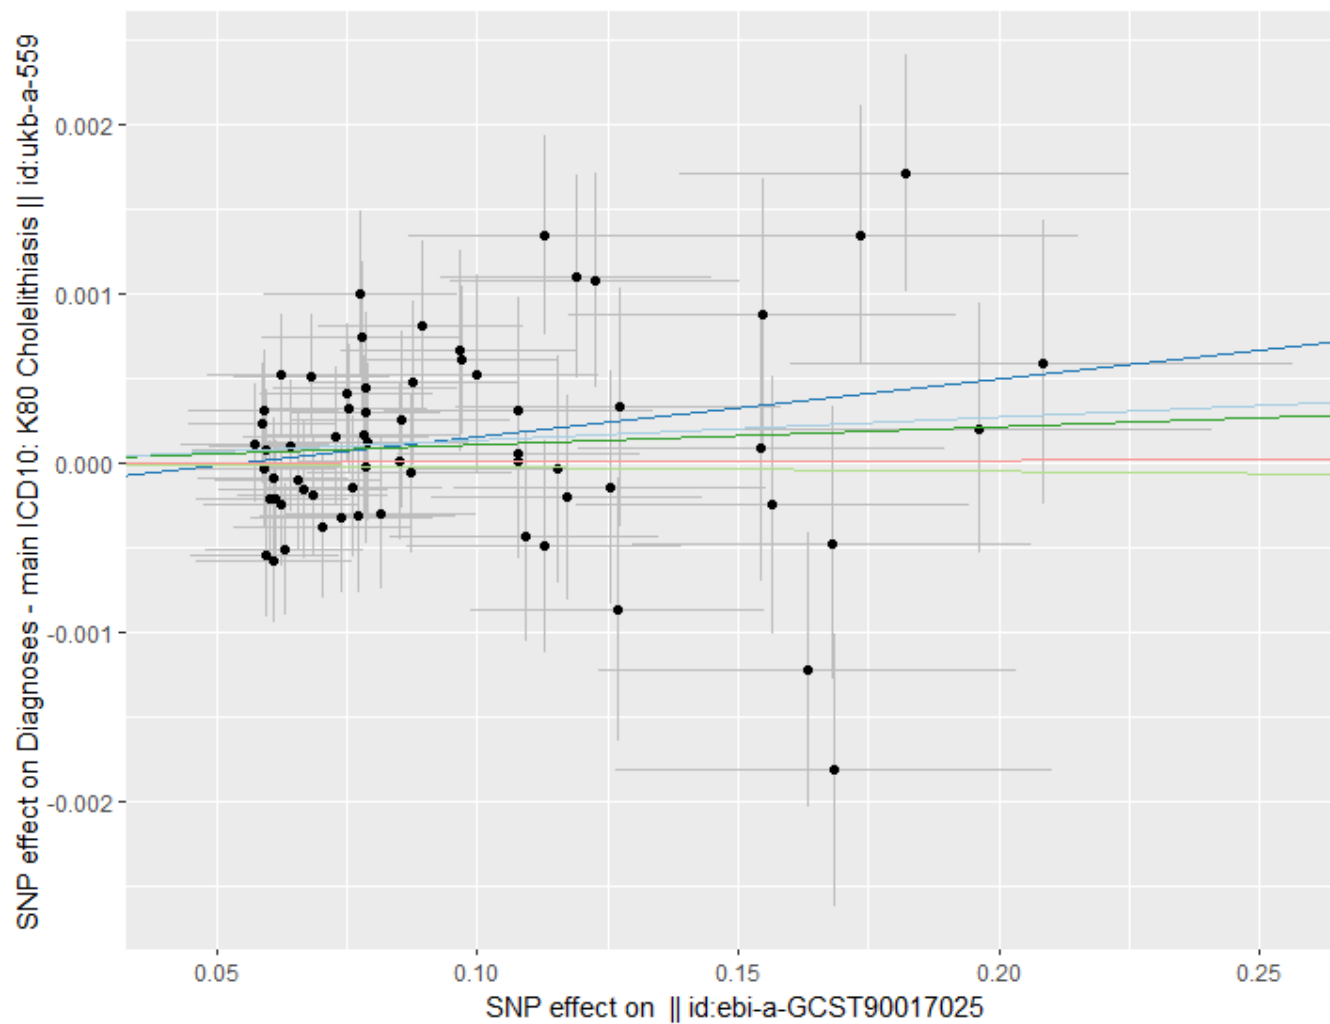

**Figure 194** Leave-one-out analysis, funnel plot, MR effect size and scatter plot for gut microbiota abundance (genus Ruminococcaceae UCG010 id.11367) on cholelithiasis

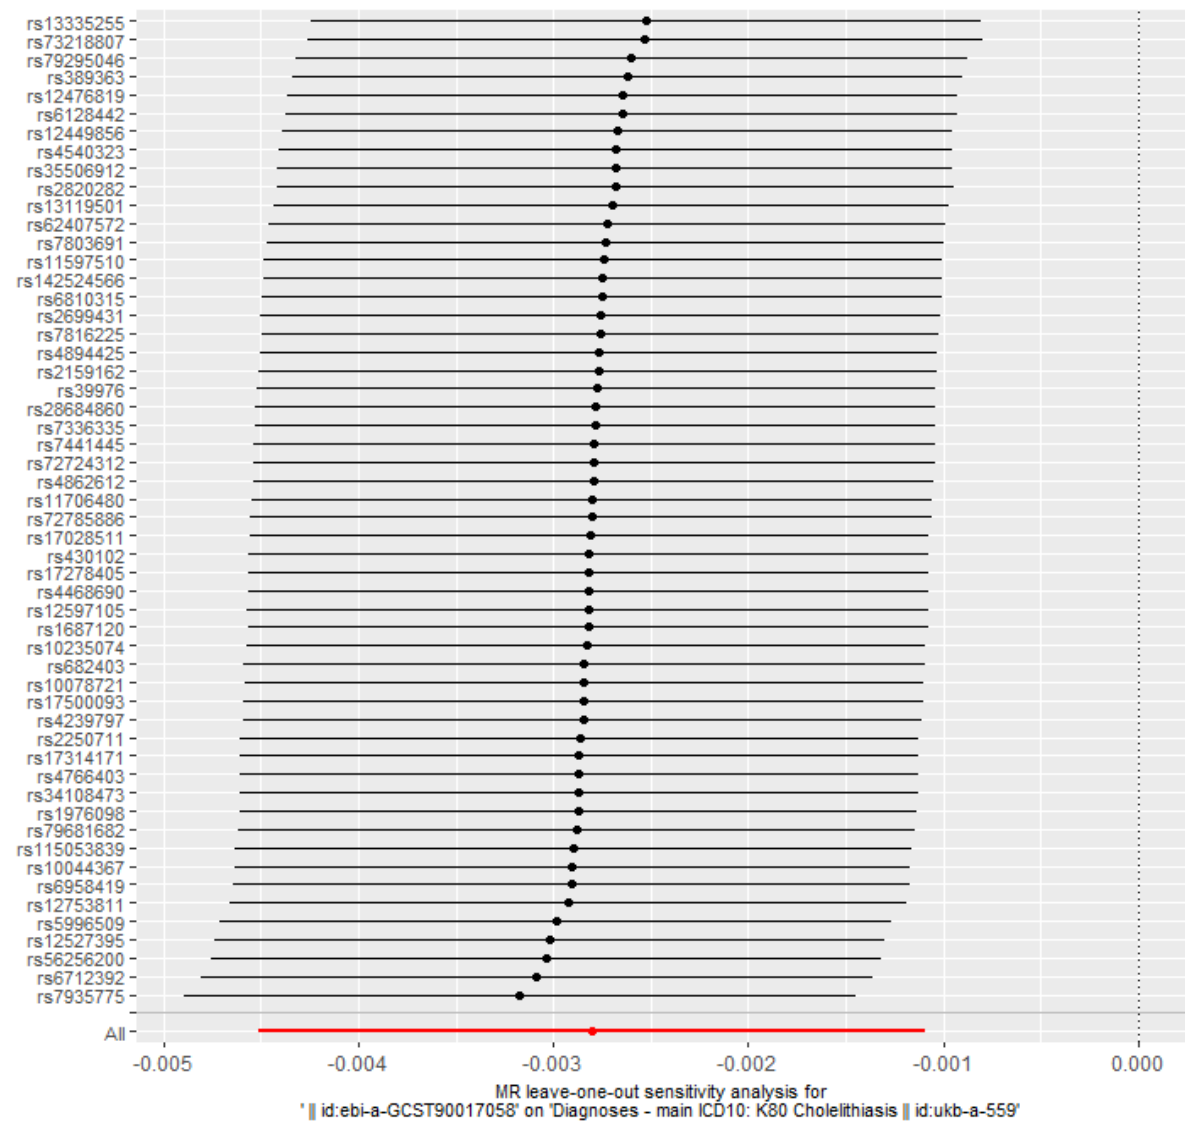

MR Method

- Inverse variance weighted
- MR Egger

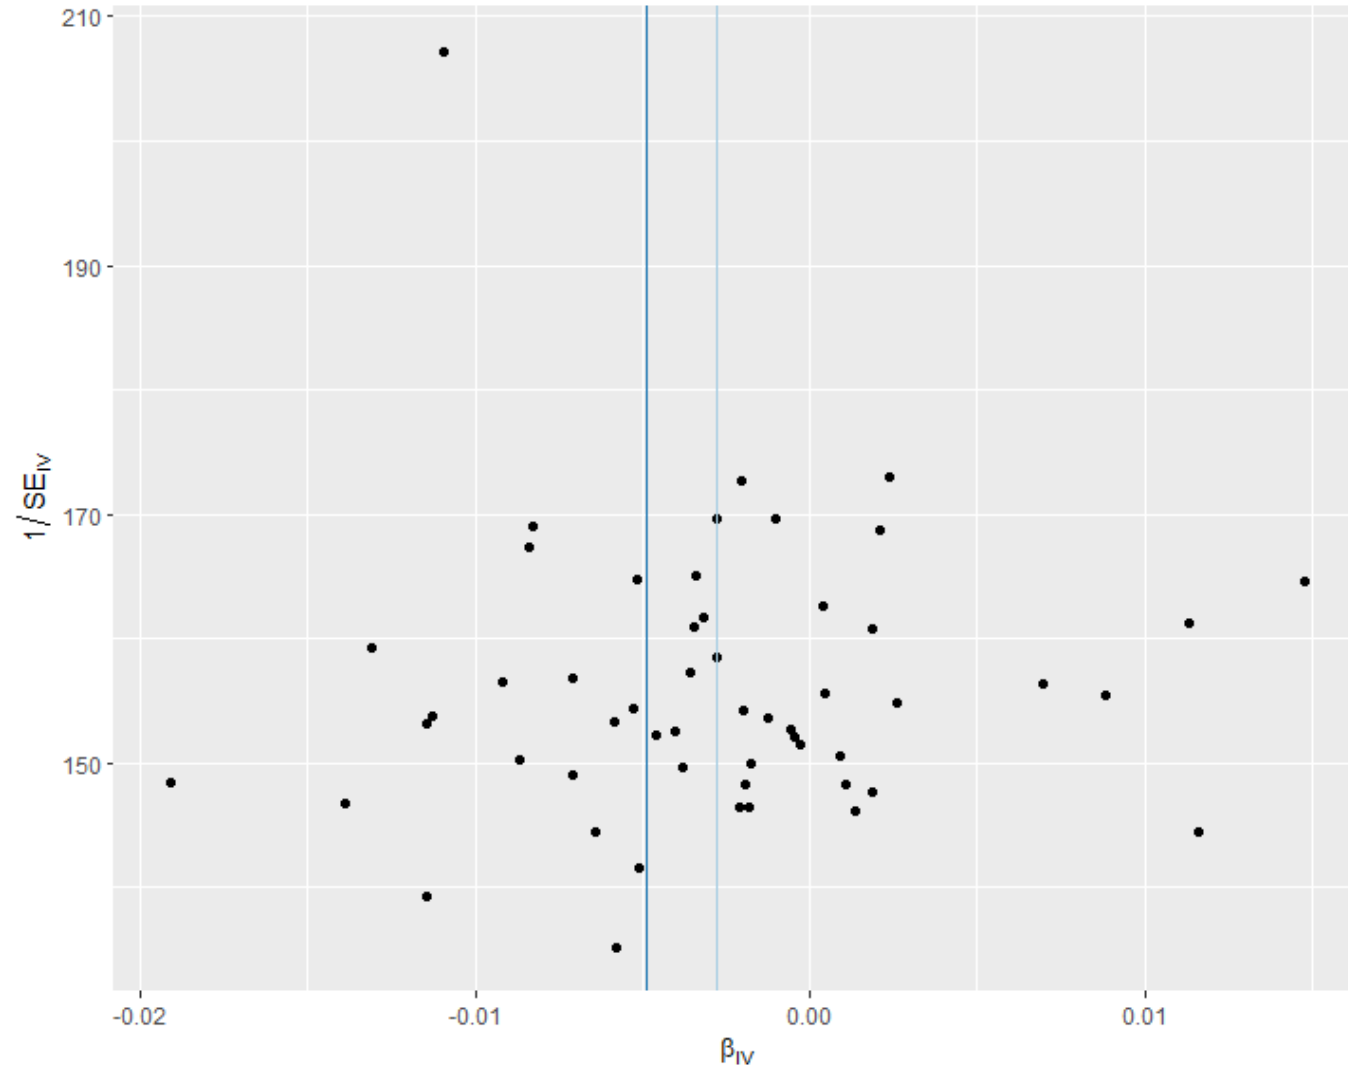

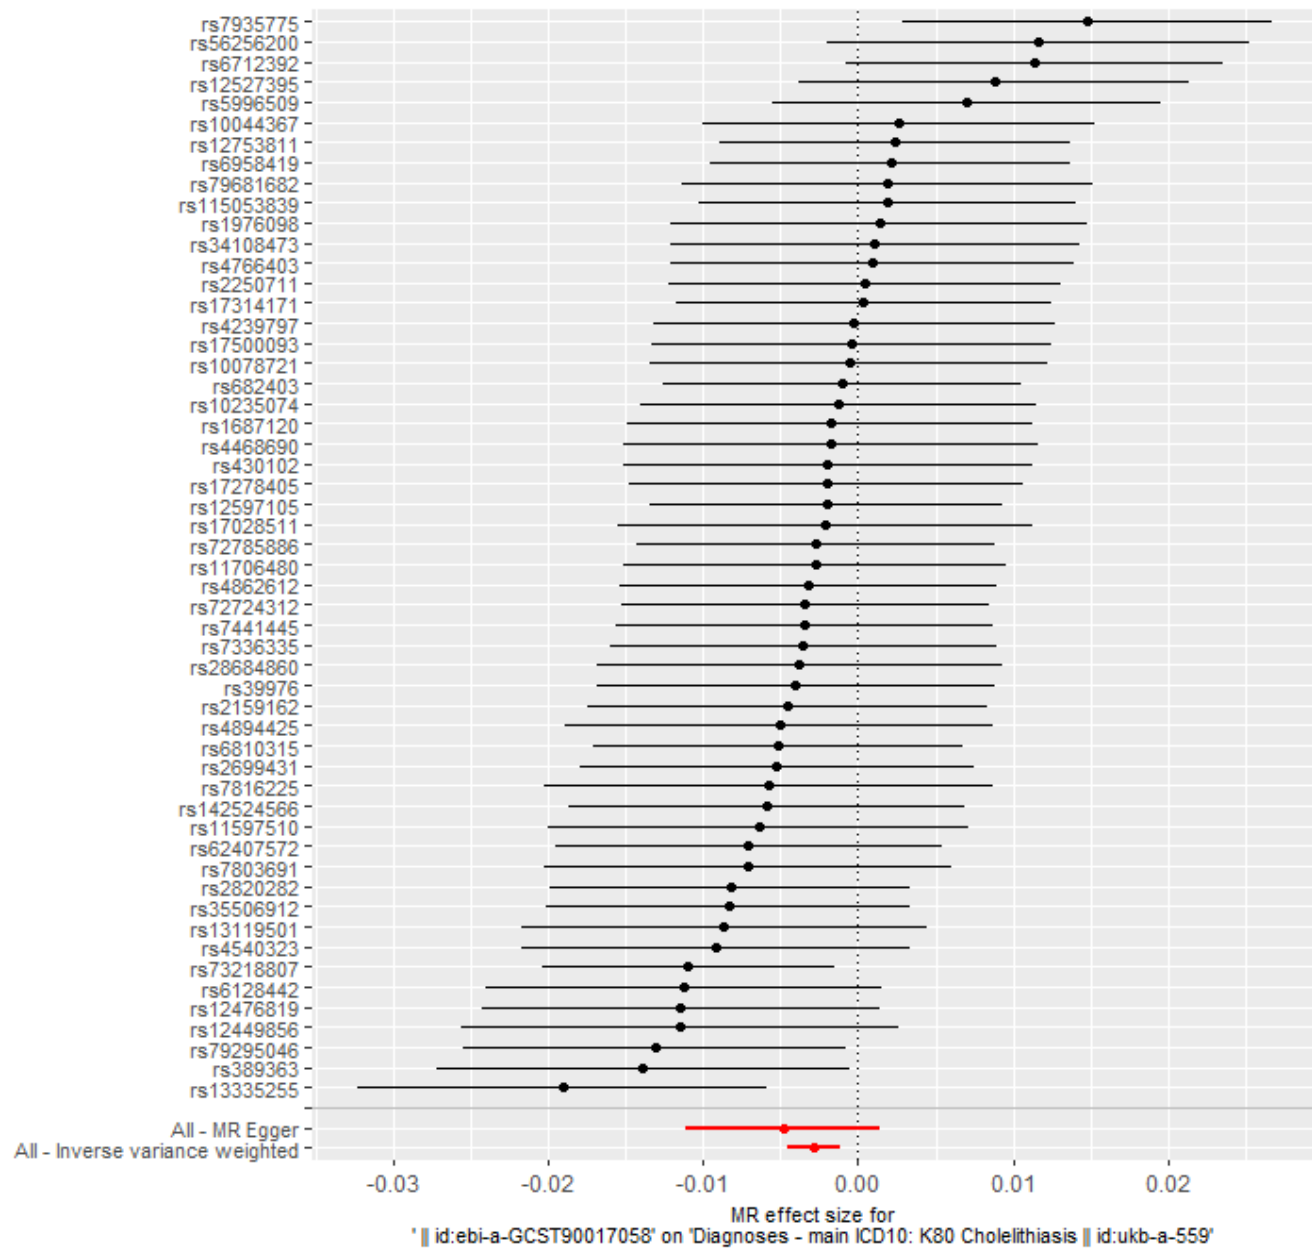

MR Test

- Inverse variance weighted
- MR Egger
- Simple mode
- Weighted median
- Weighted mode

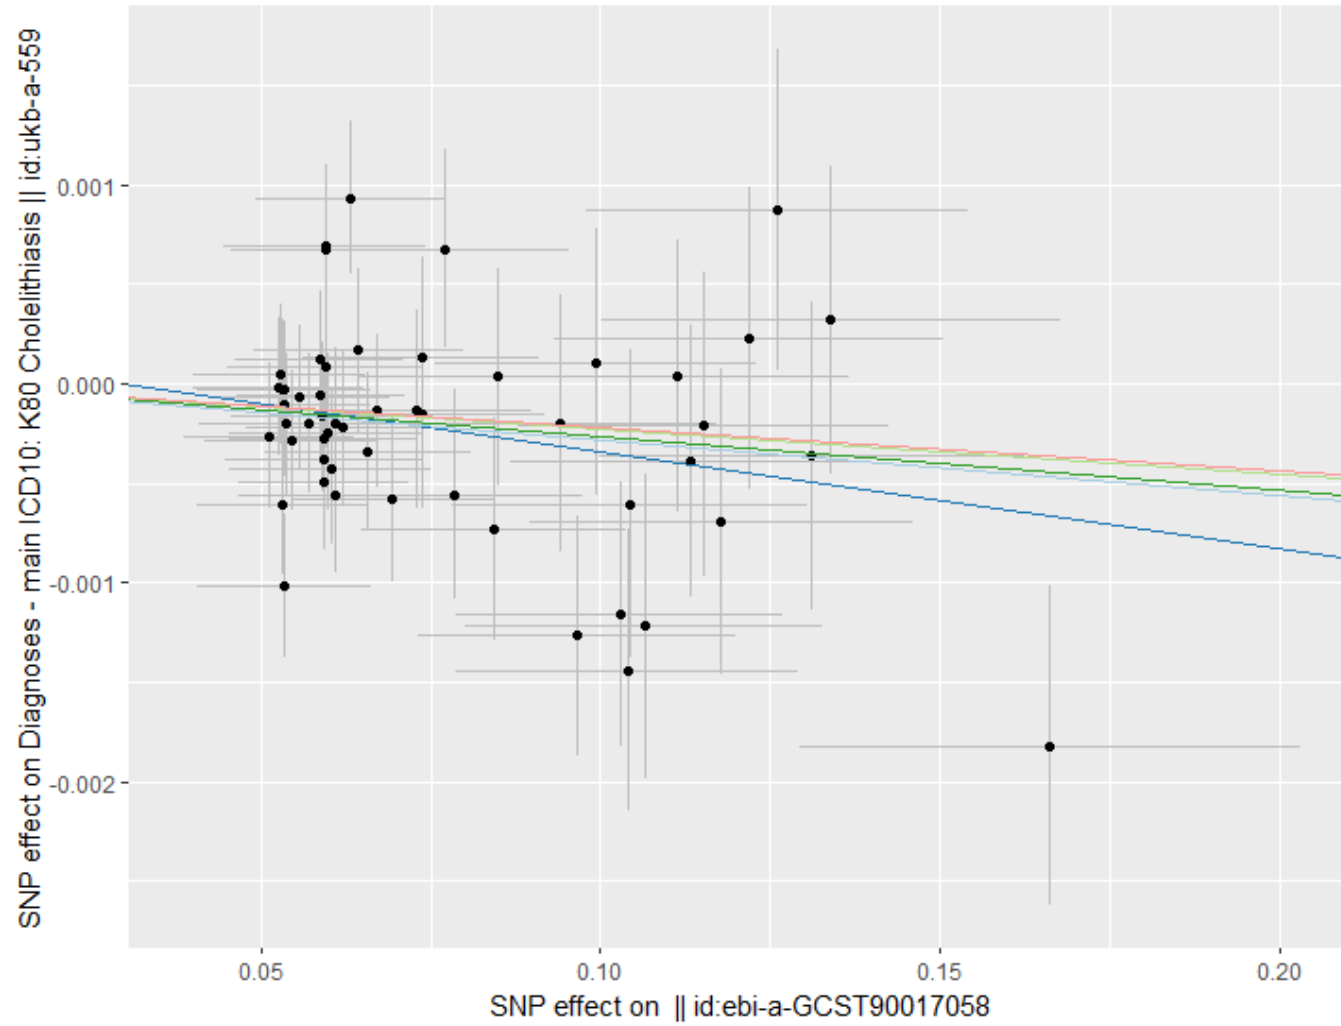



**Figure 195** Leave-one-out analysis, funnel plot, MR effect size and scatter plot for gut microbiota abundance (order Selenomonadales id.2165) on cholelithiasis

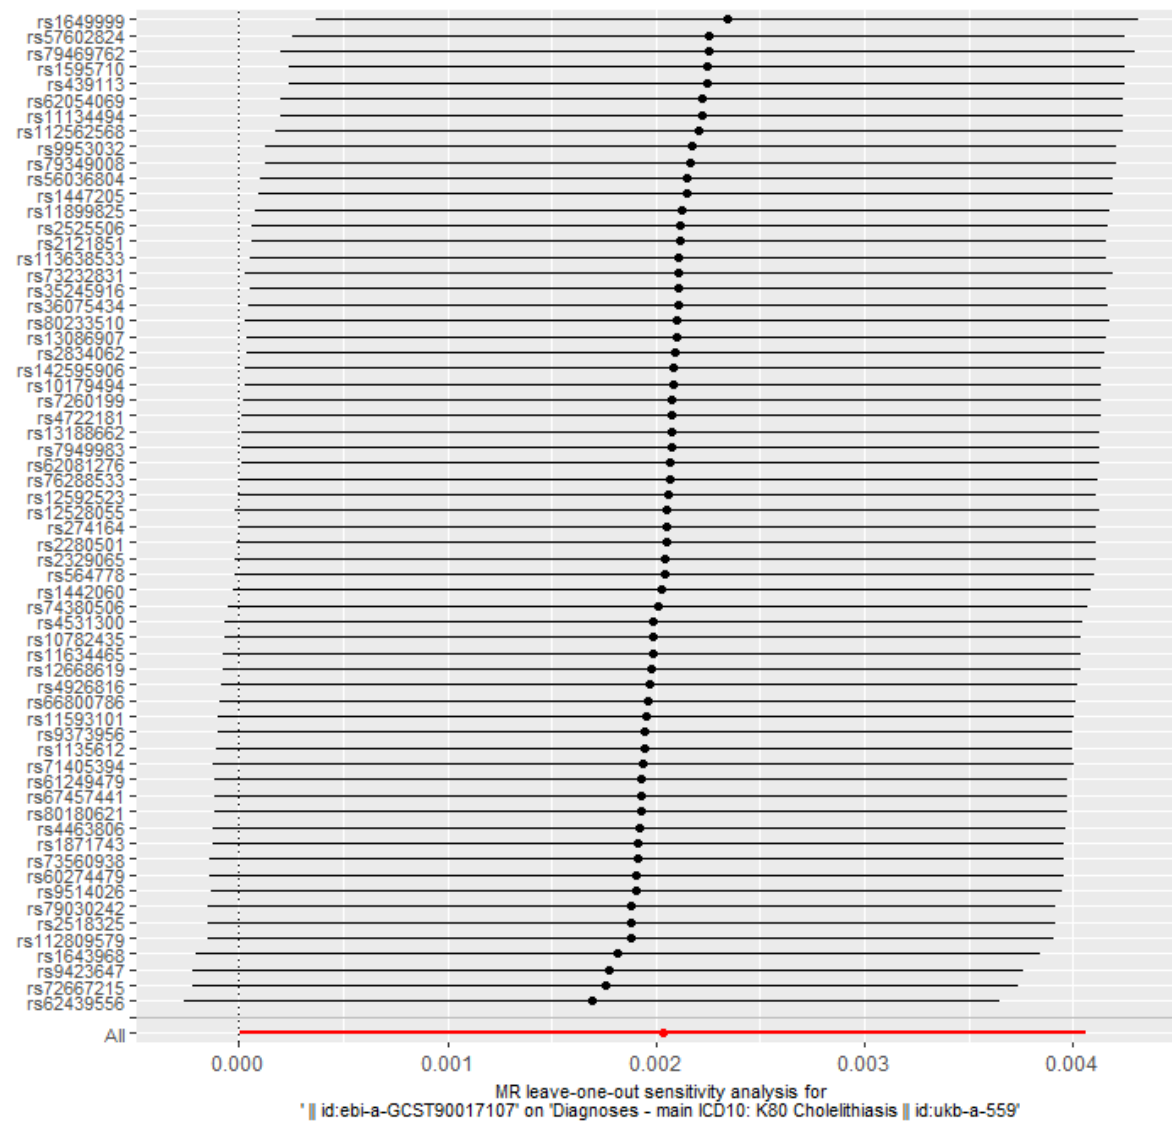

MR Method

- Inverse variance weighted
- MR Egger

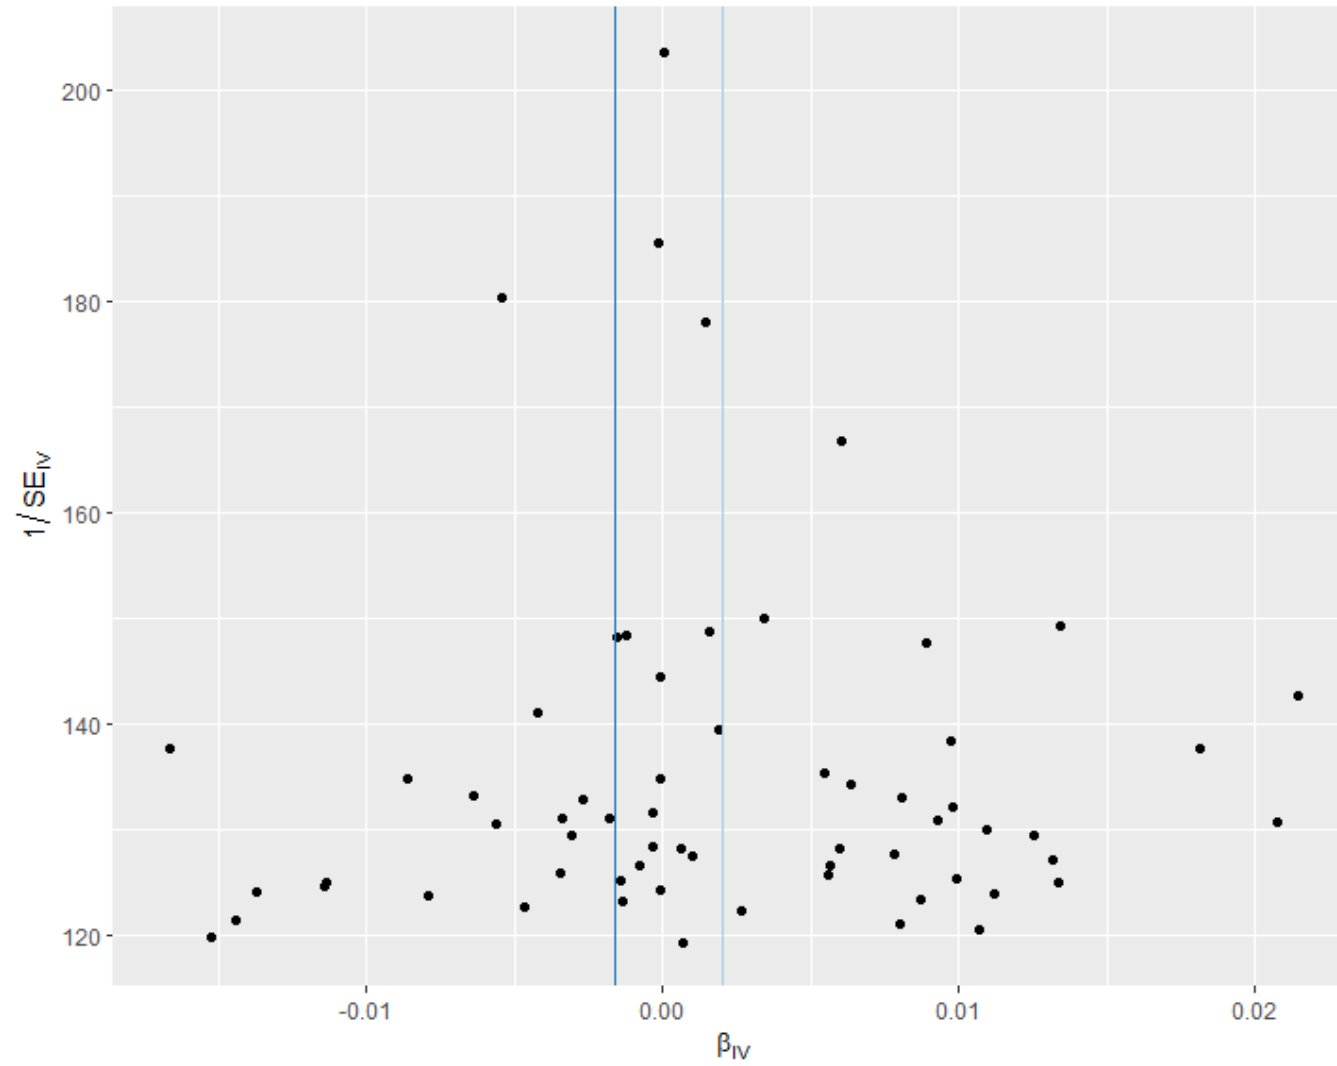

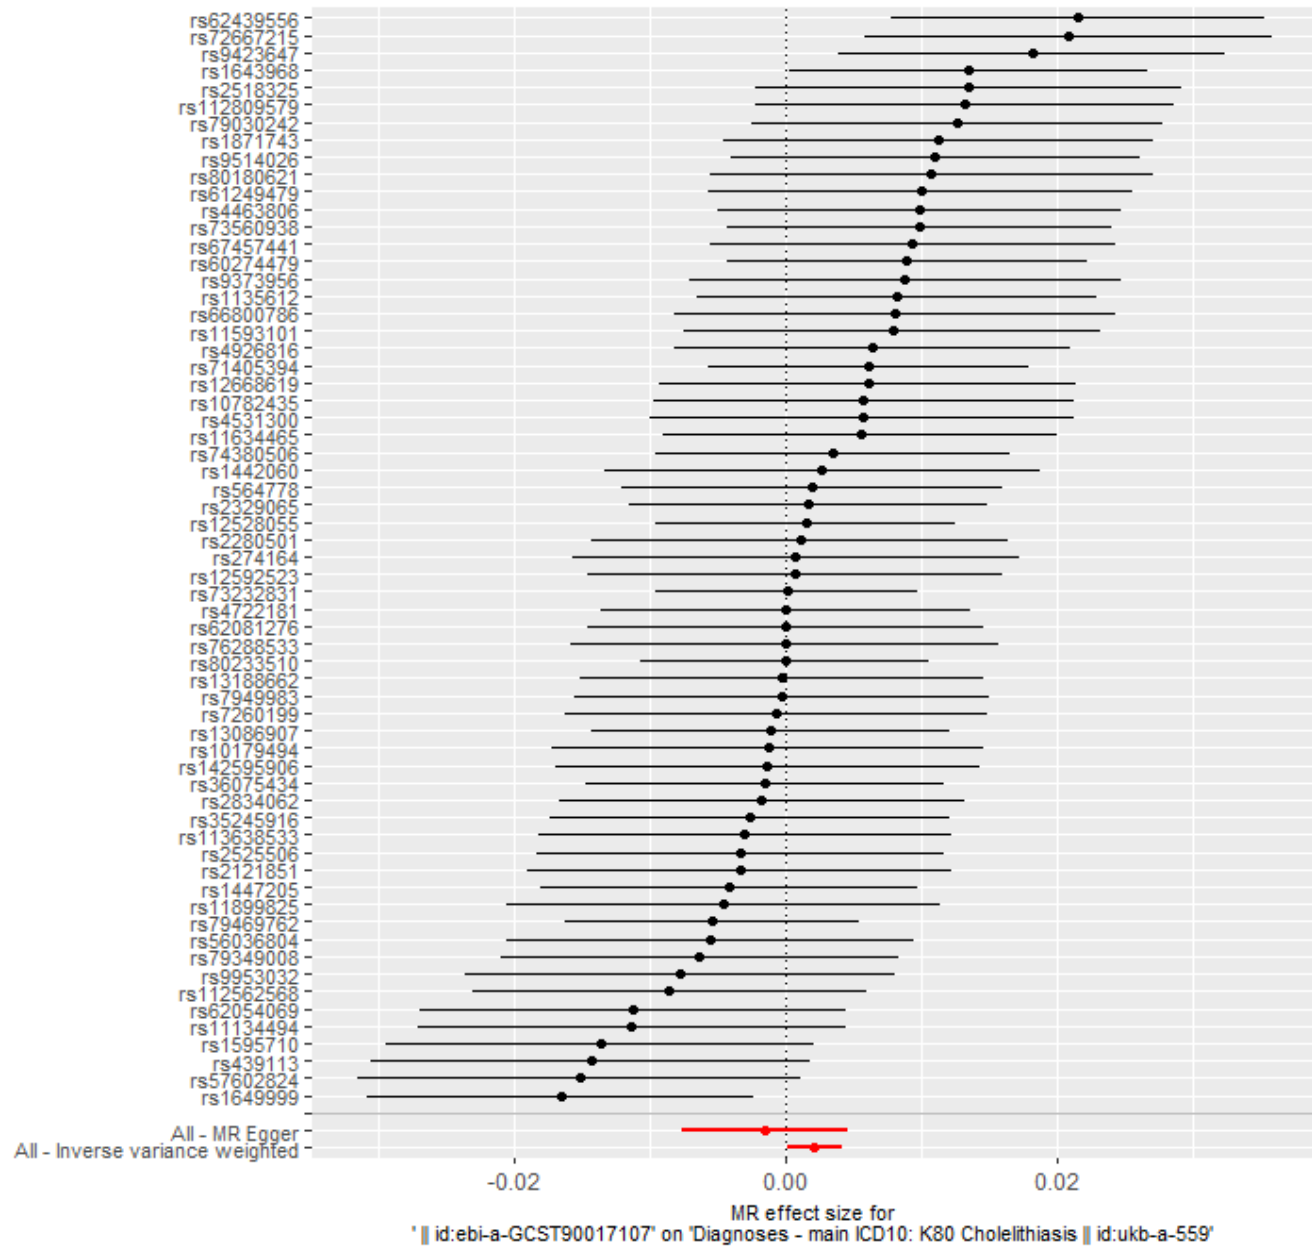

MR Test

- Inverse variance weighted
- MR Egger
- Simple mode
- Weighted median
- Weighted mode

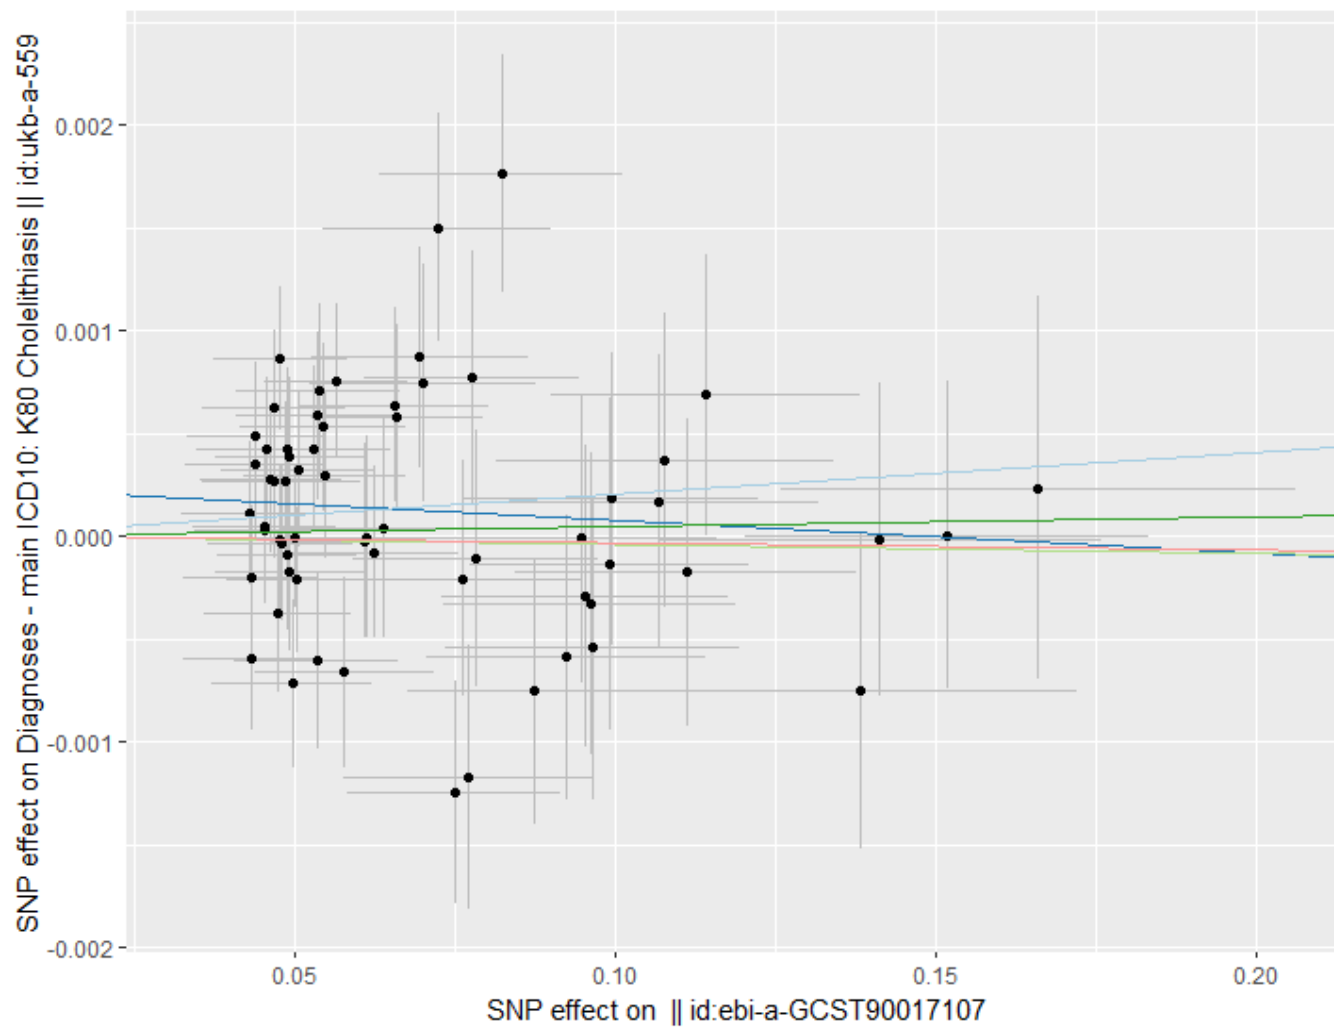

**Figure 196** Leave-one-out analysis, funnel plot, MR effect size and scatter plot for gut microbiota abundance (class Methanobacteria id.119) on acute pancreatitis

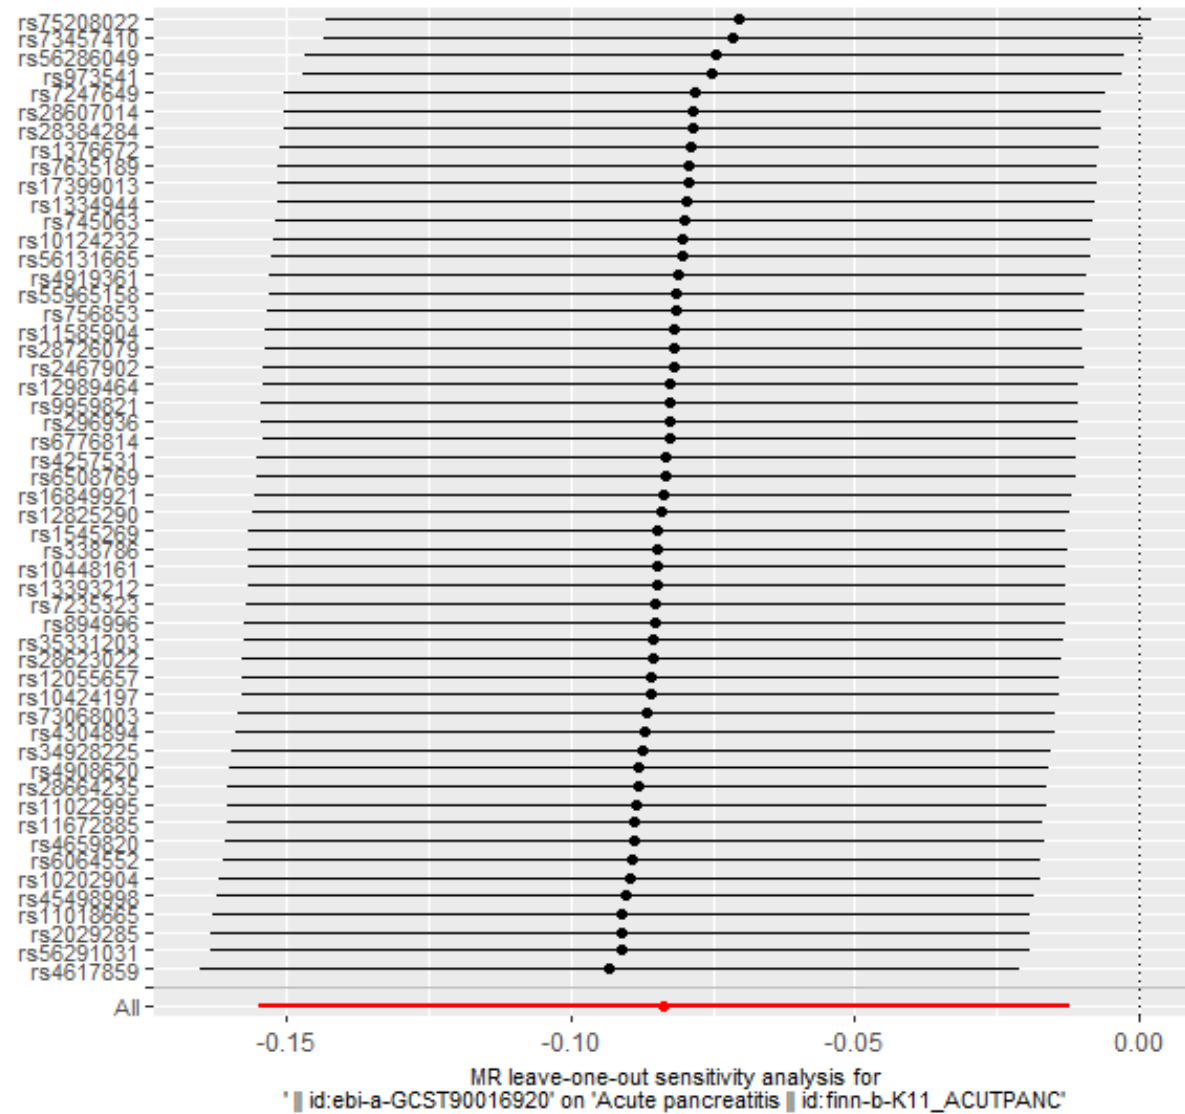

MR Method

- Inverse variance weighted
- MR Egger

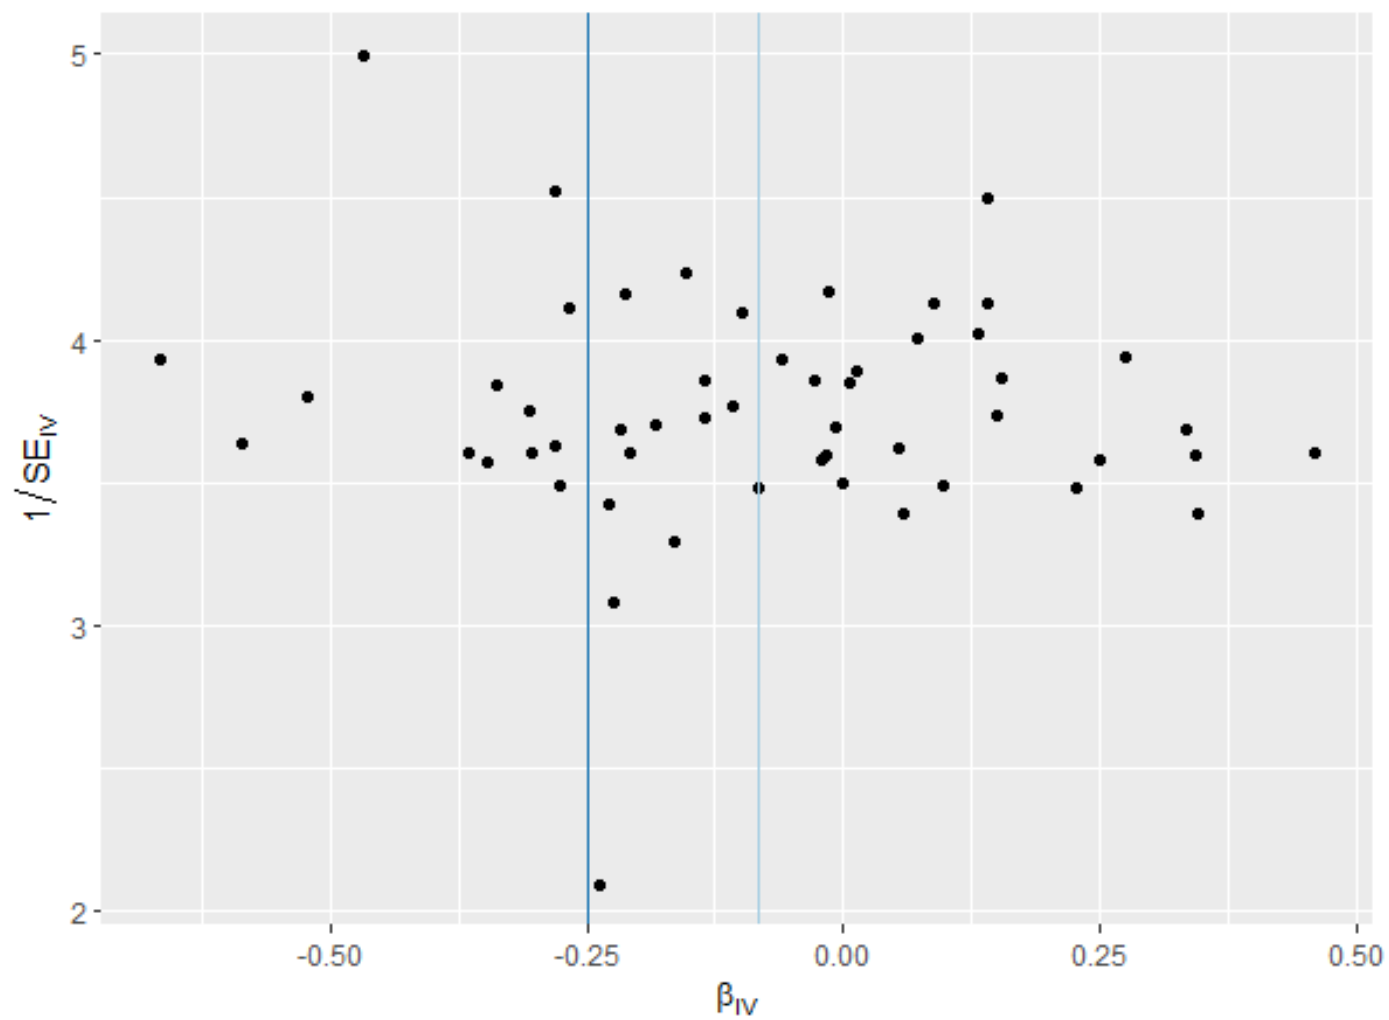

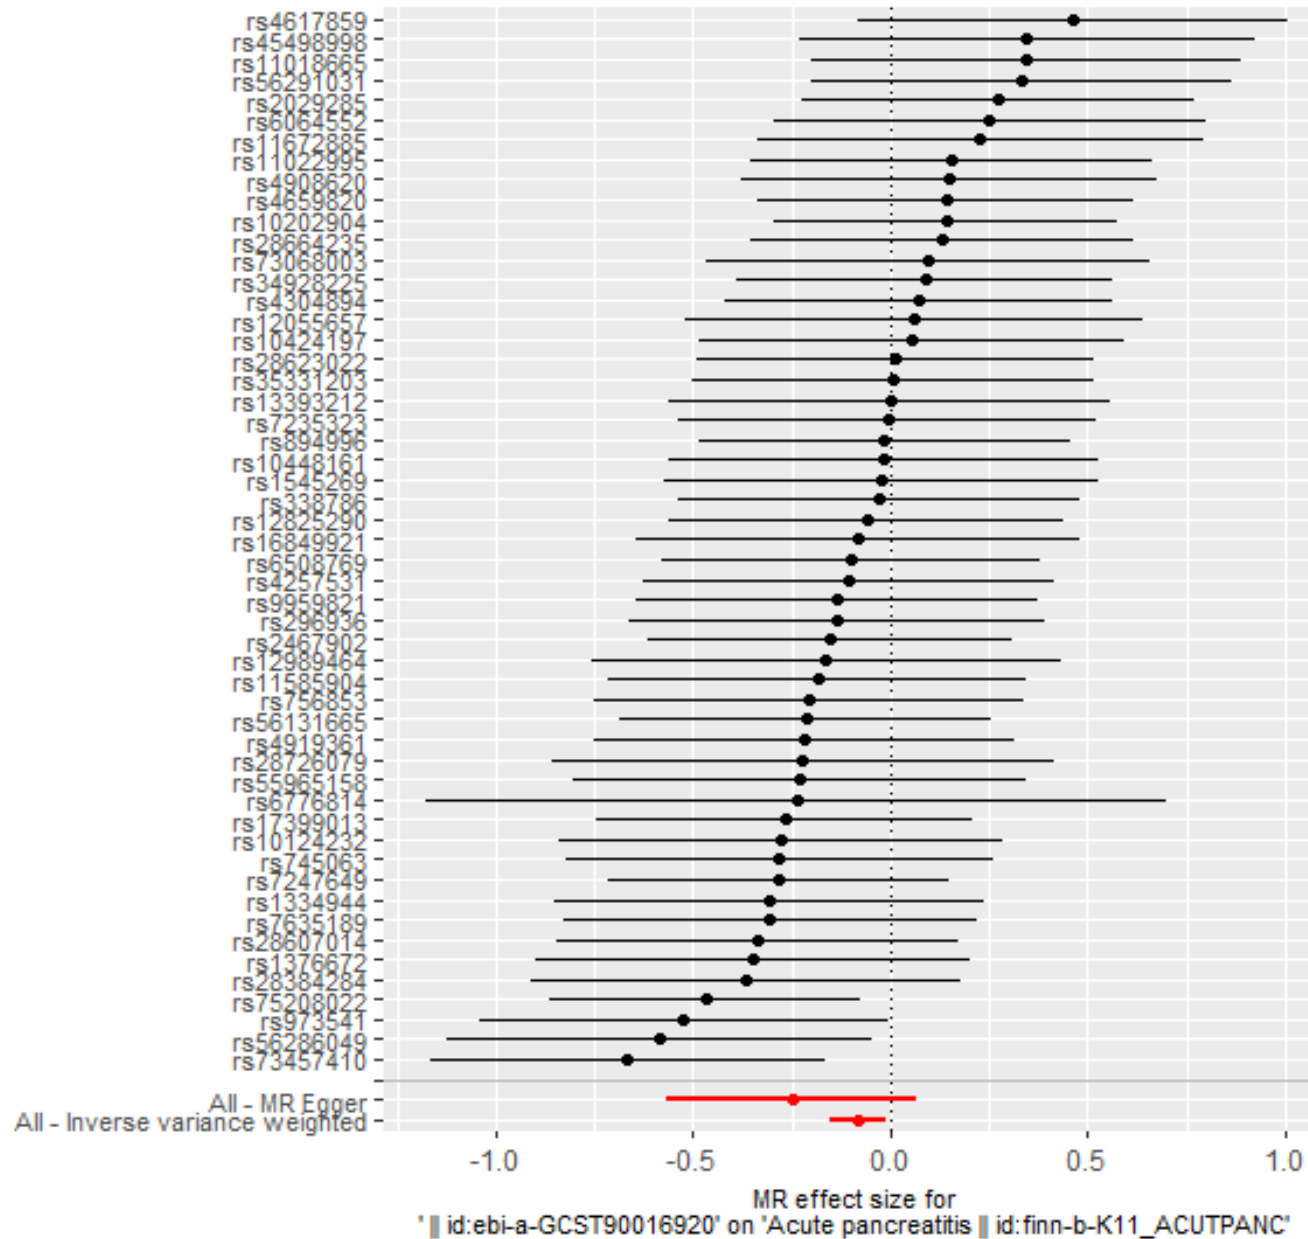

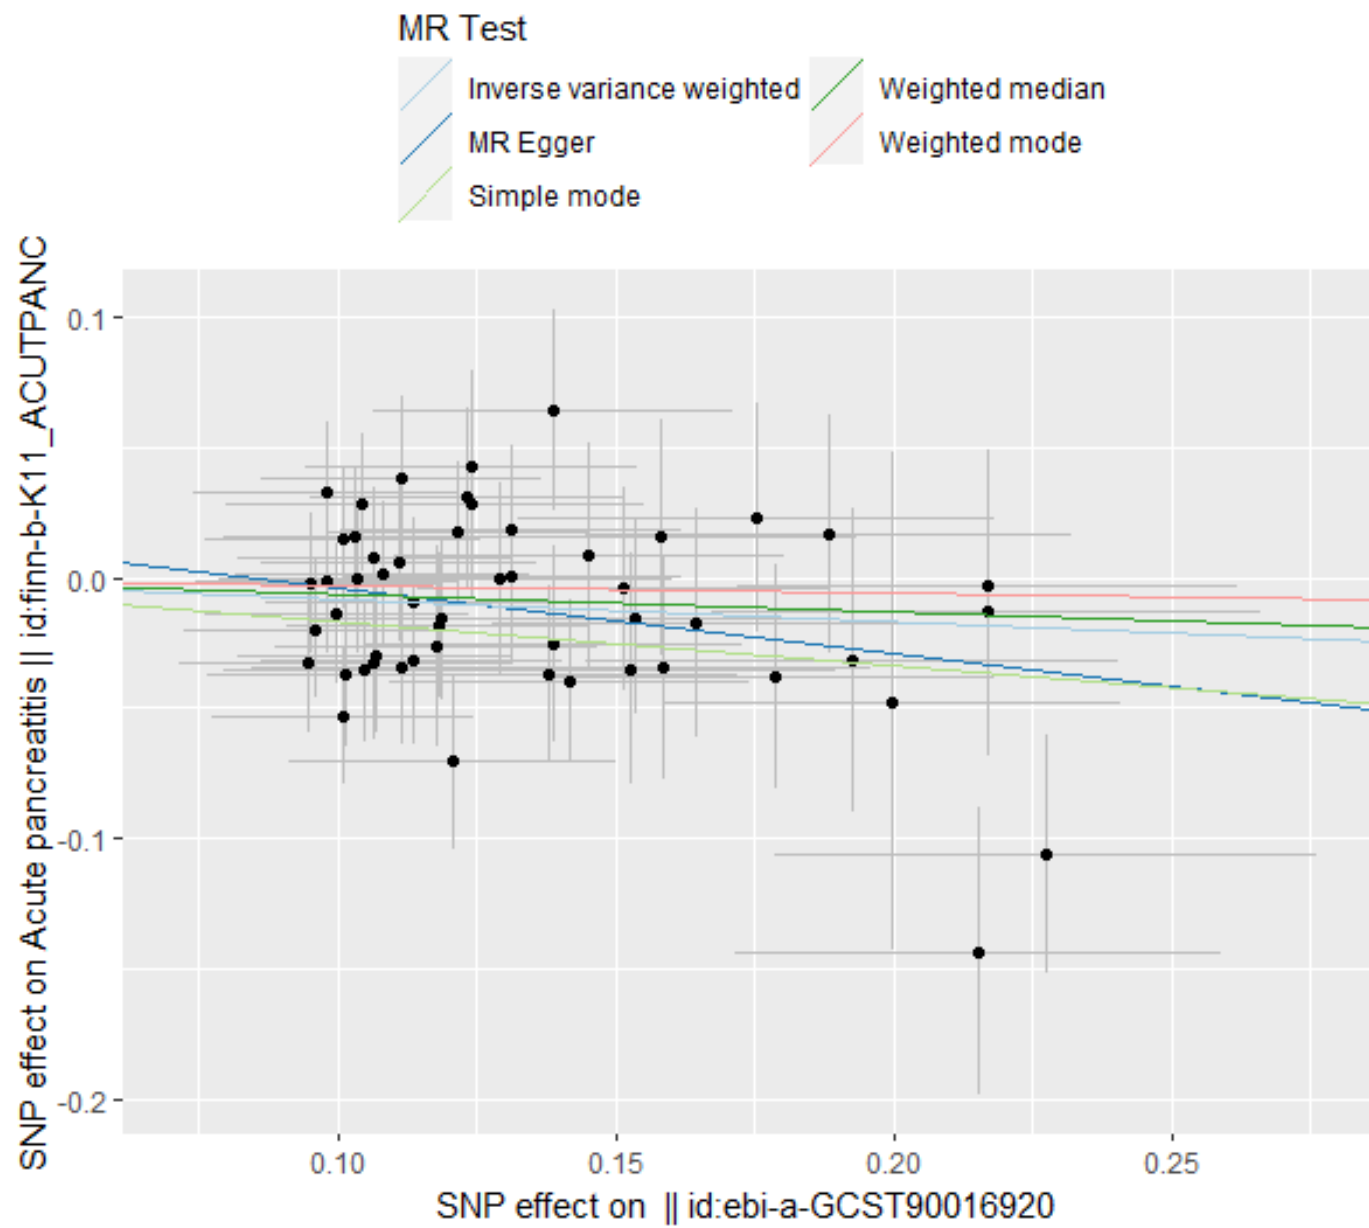



**Figure 197** Leave-one-out analysis, funnel plot, MR effect size and scatter plot for gut microbiota abundance (family Methanobacteriaceae id.121) on acute pancreatitis

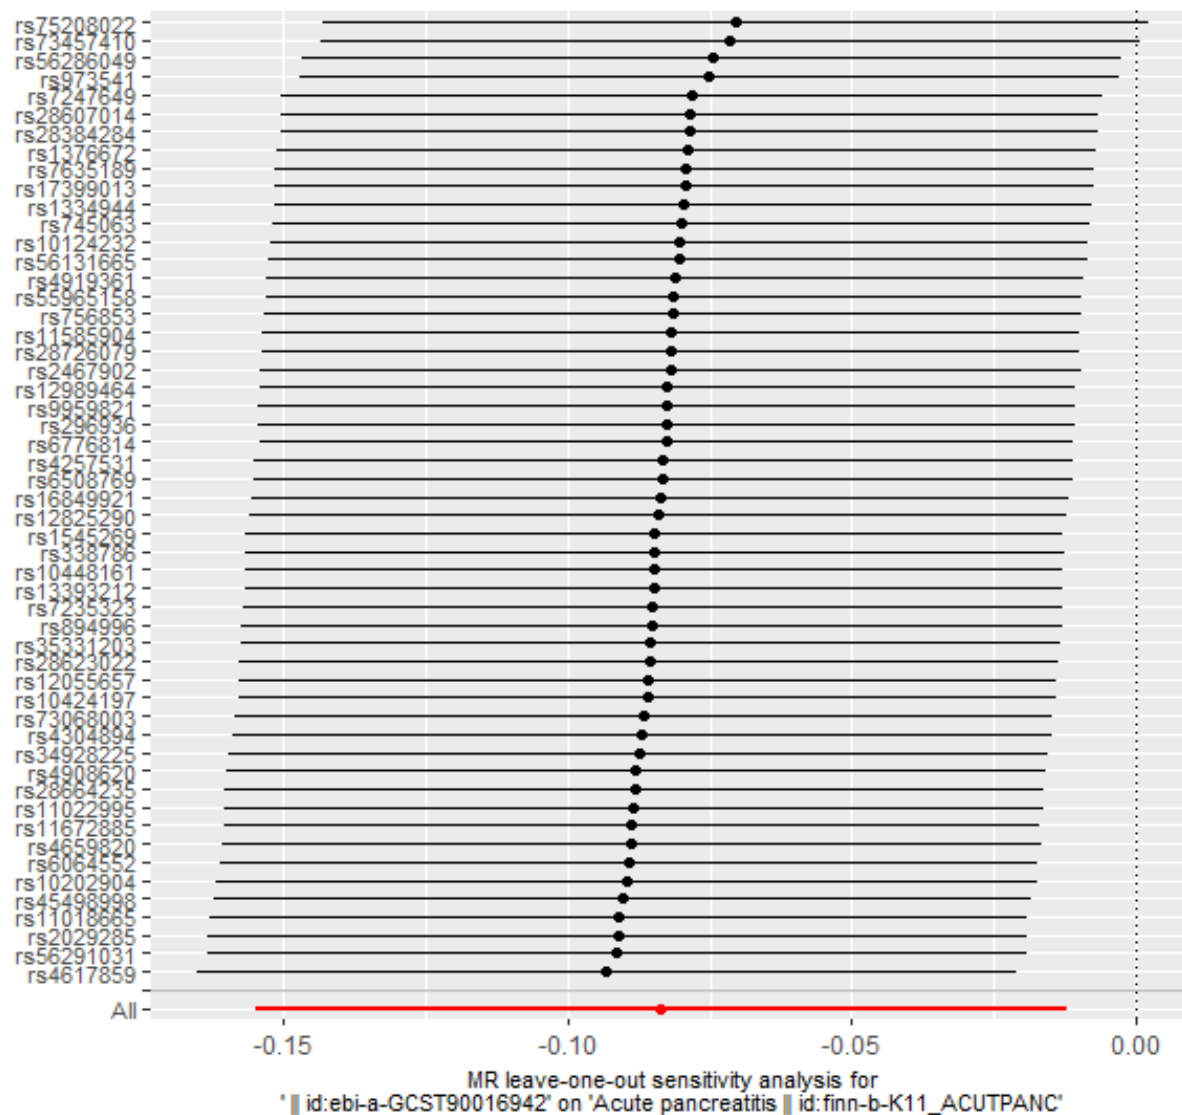

MR Method

- Inverse variance weighted
- MR Egger

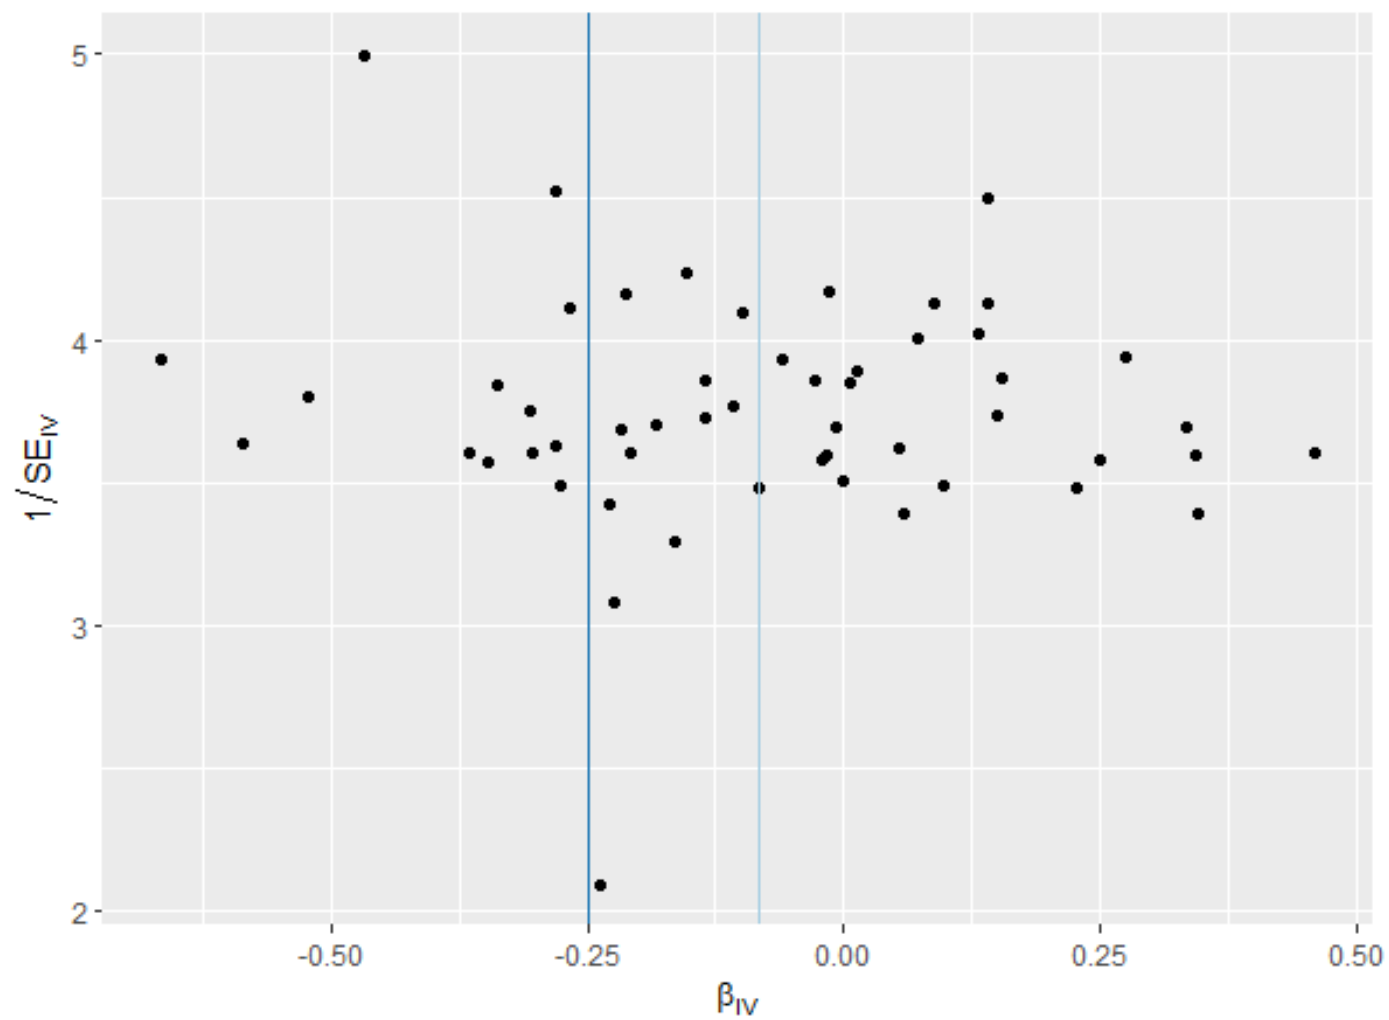

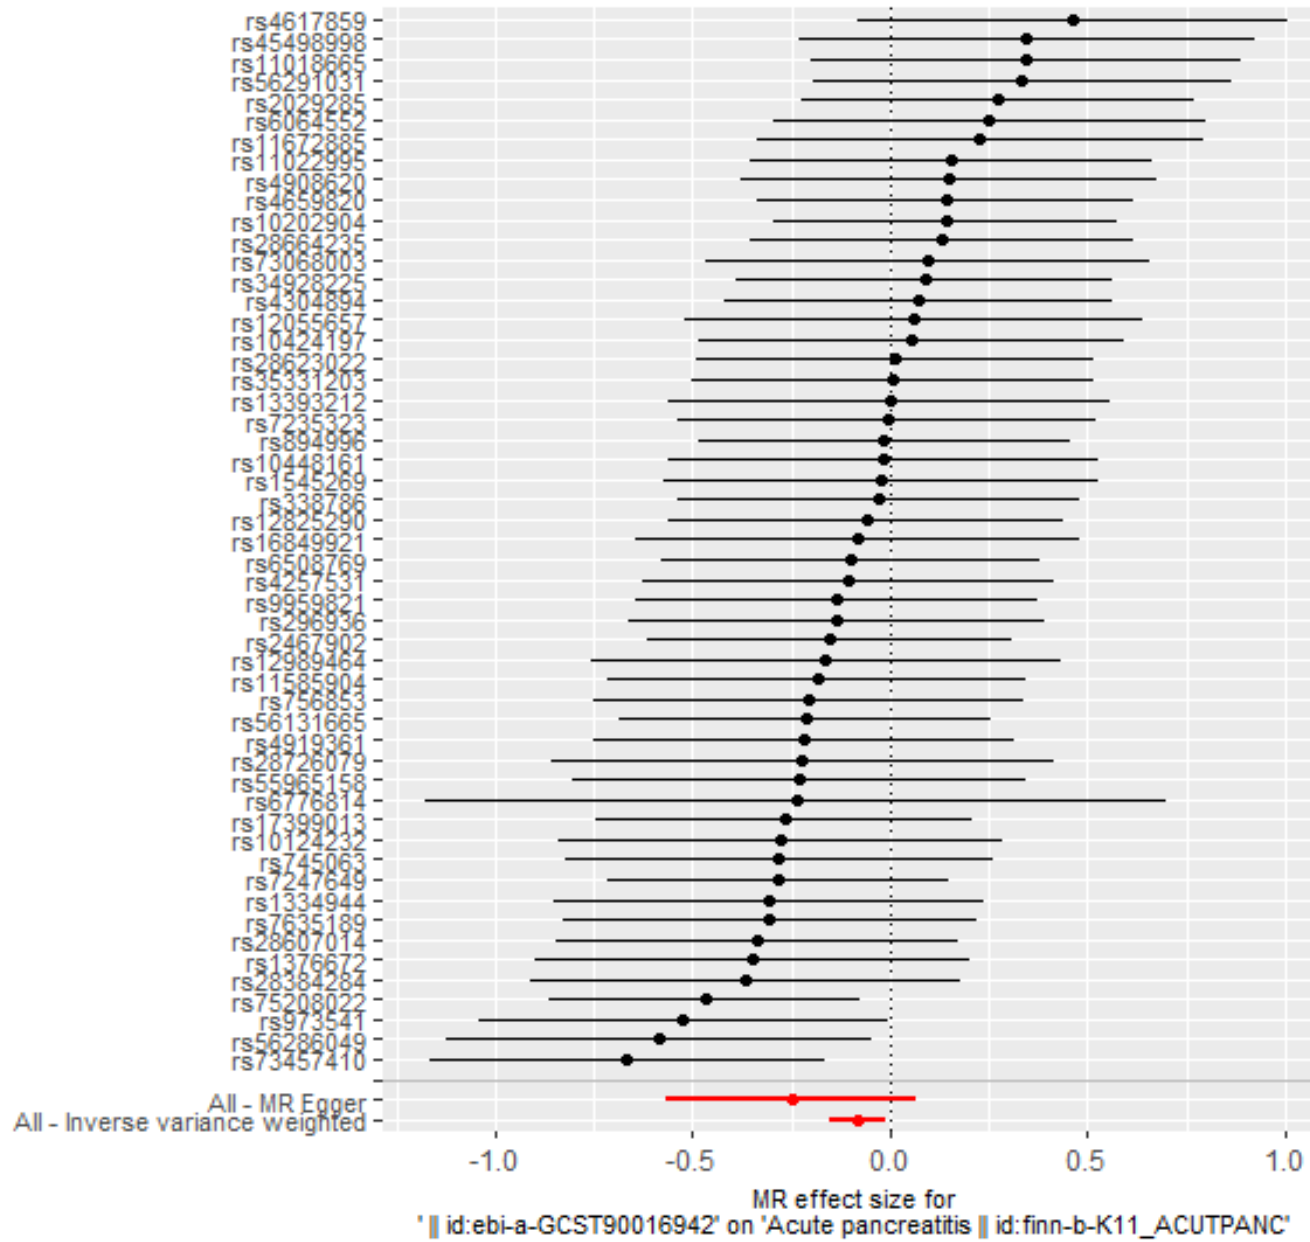

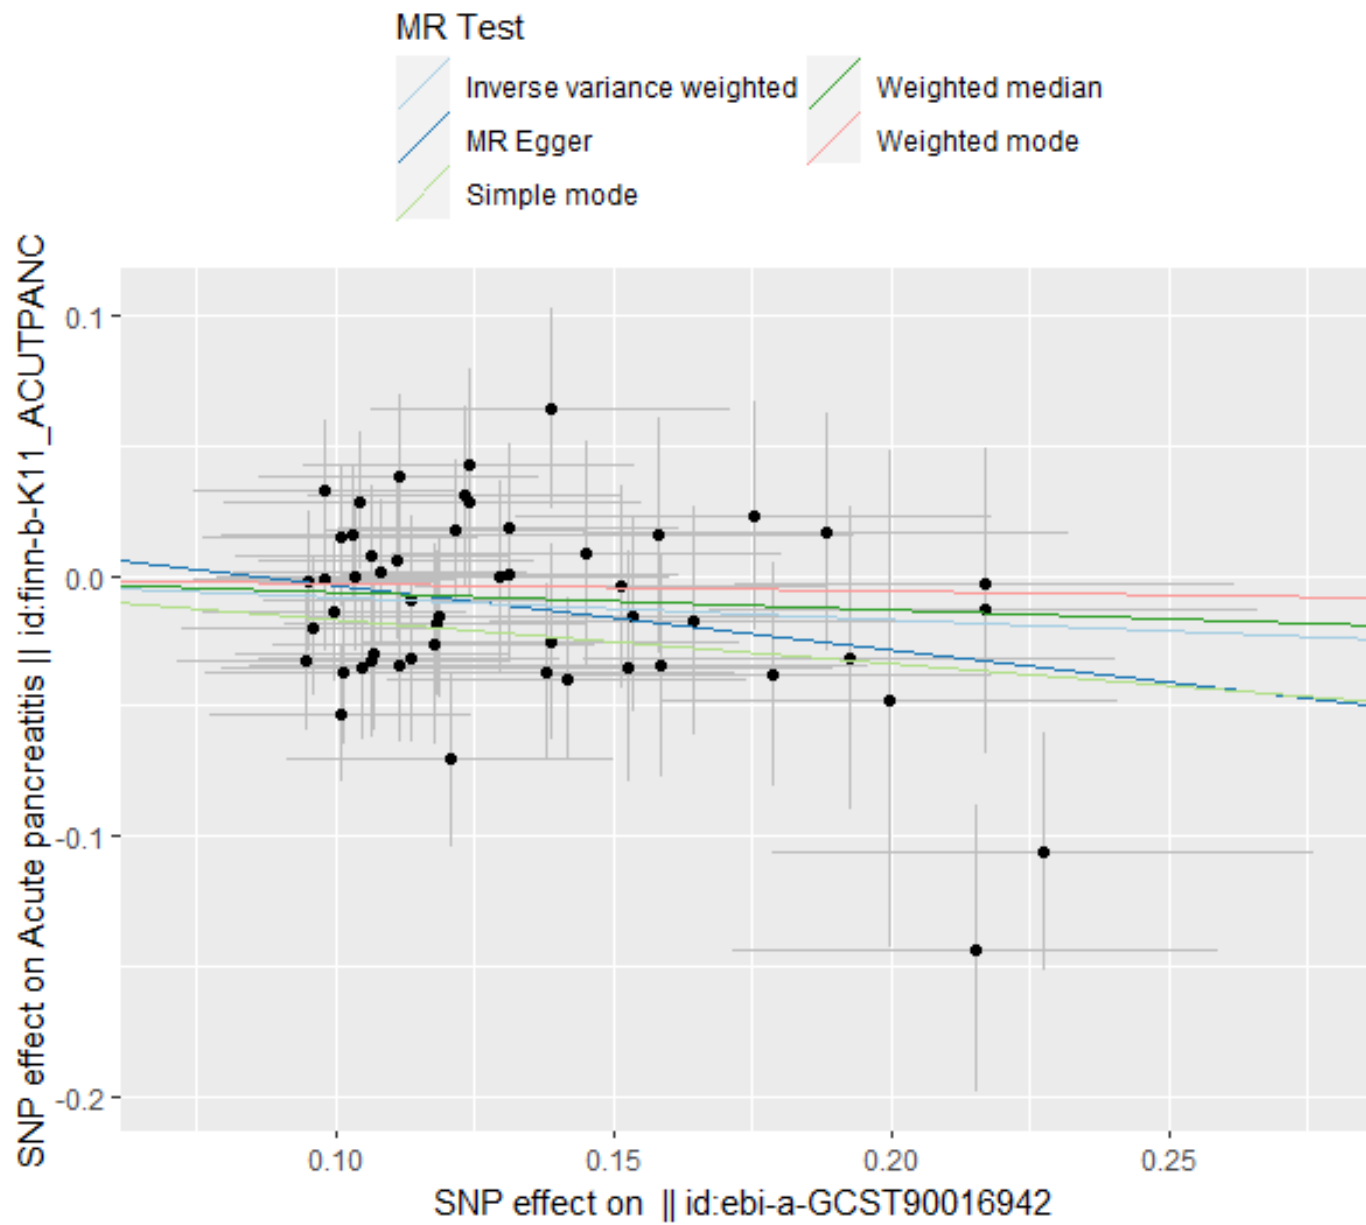

**Figure 198** Leave-one-out analysis, funnel plot, MR effect size and scatter plot for gut microbiota abundance (genus *Allisonella* id.2174) on acute pancreatitis

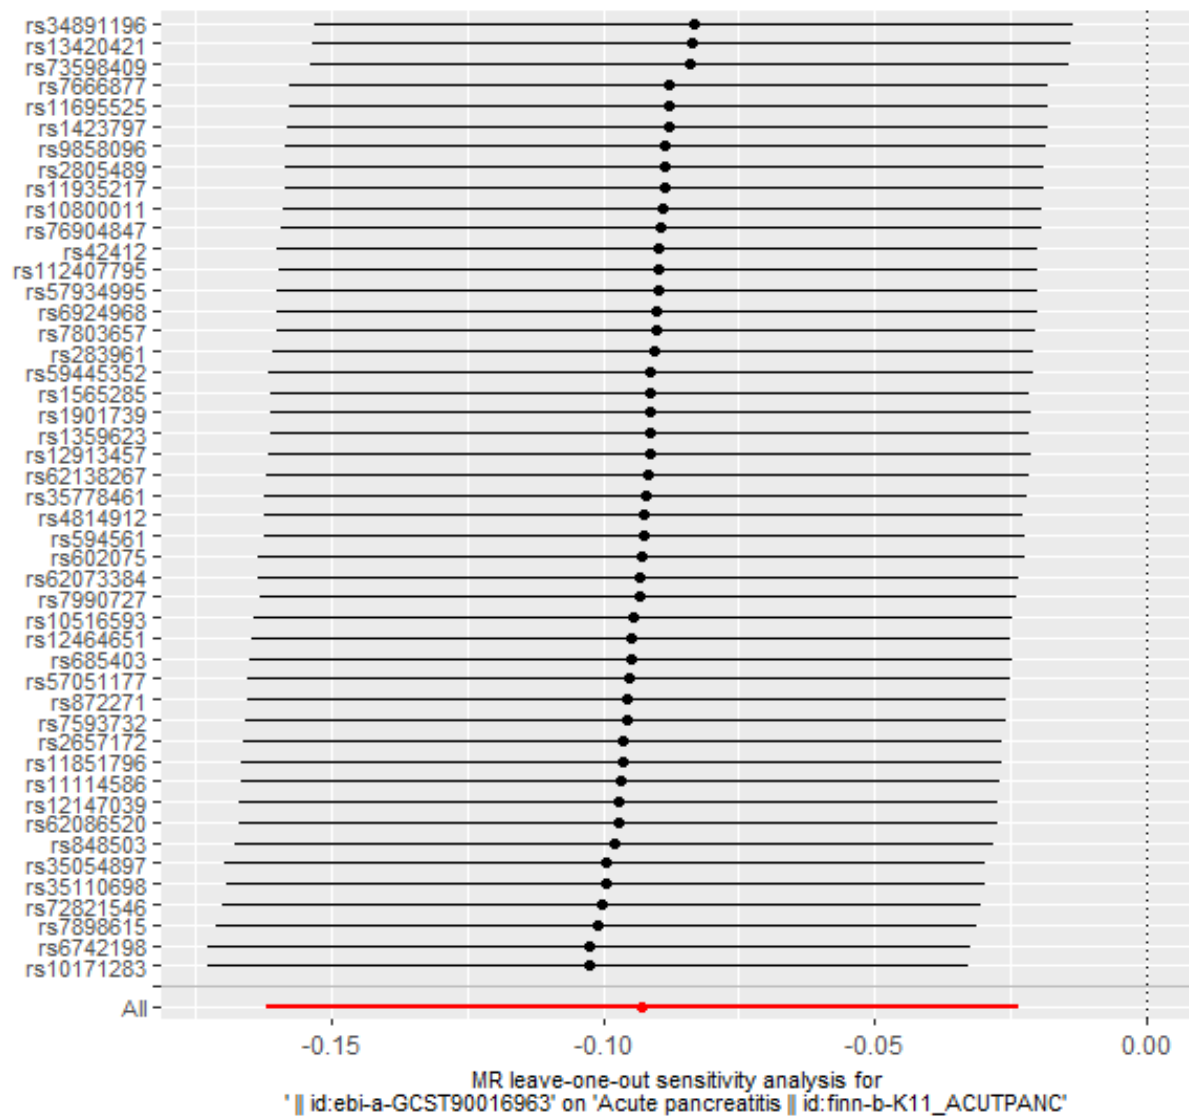

MR Method

- Inverse variance weighted
- MR Egger

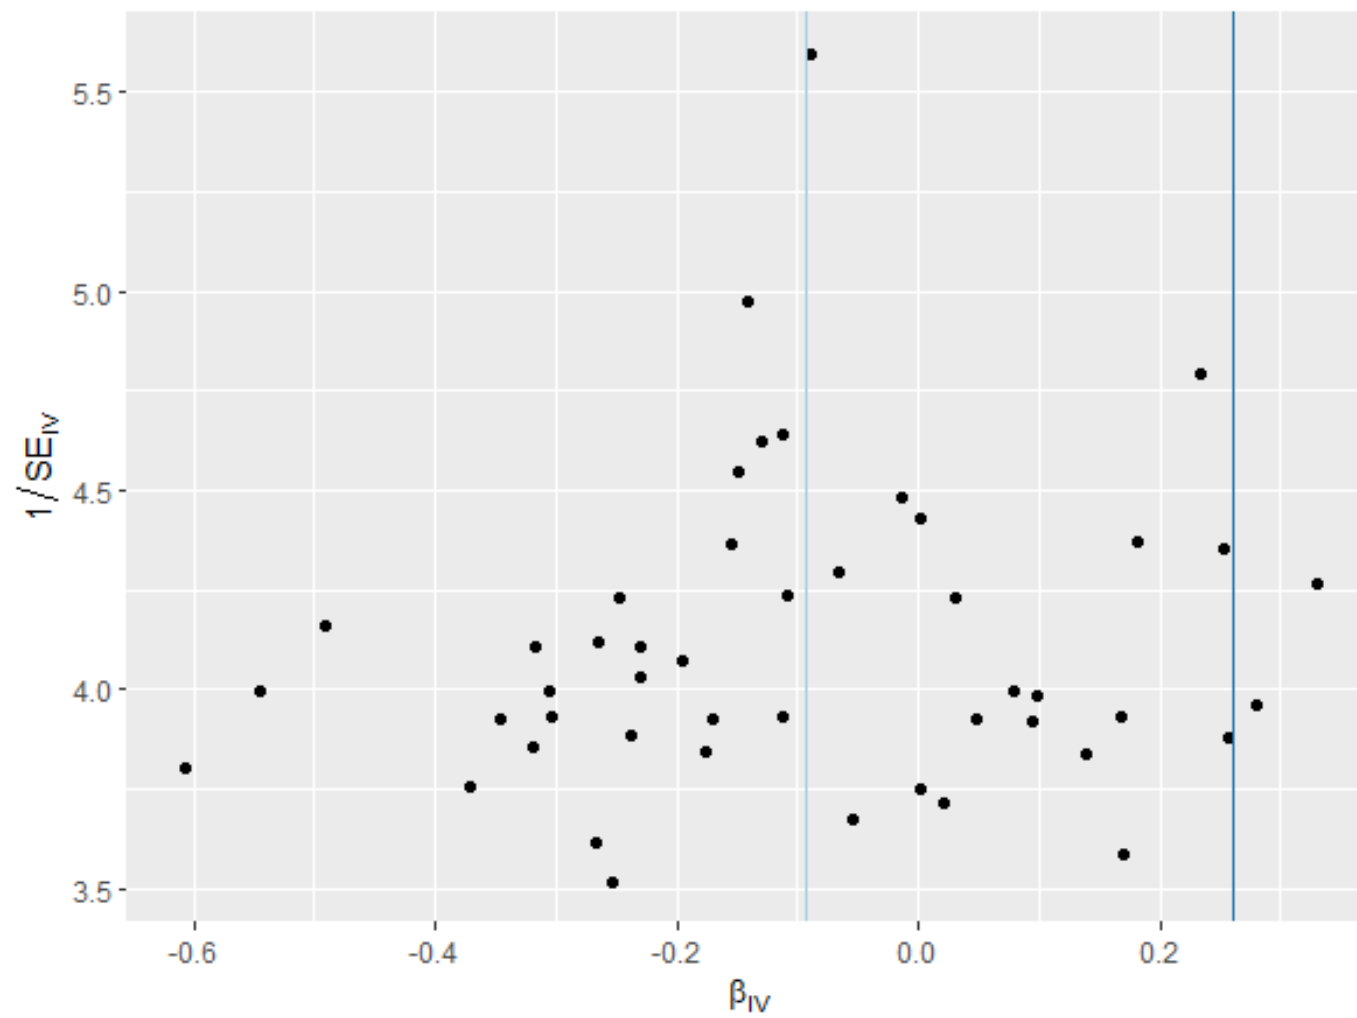

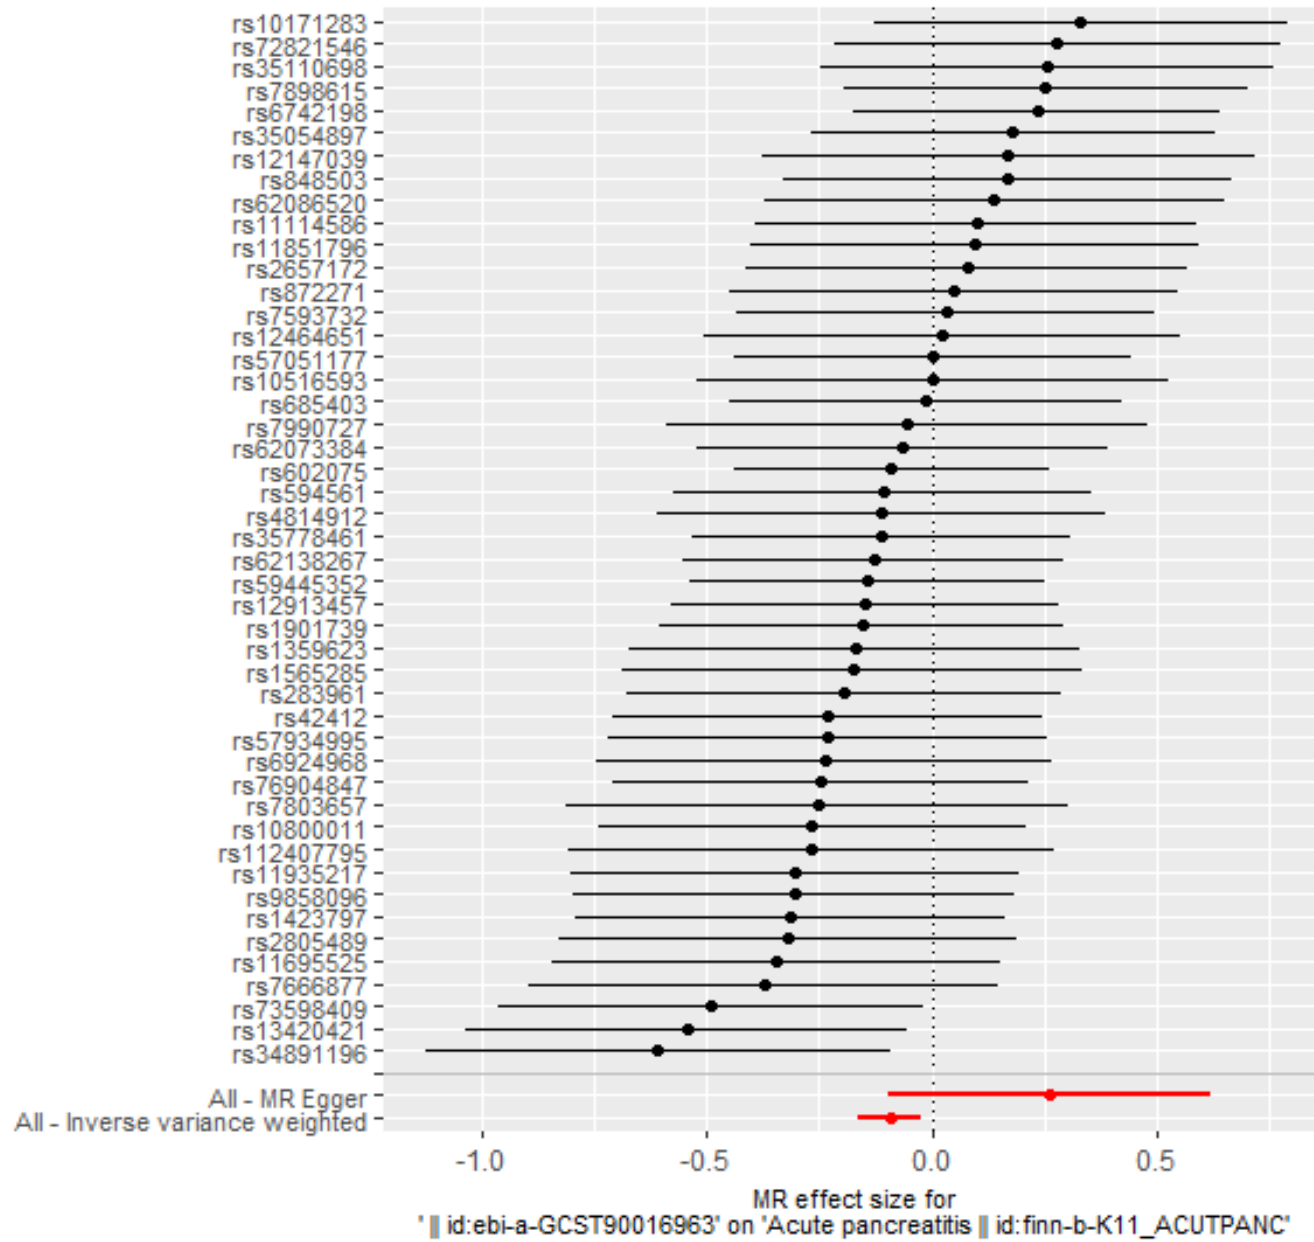

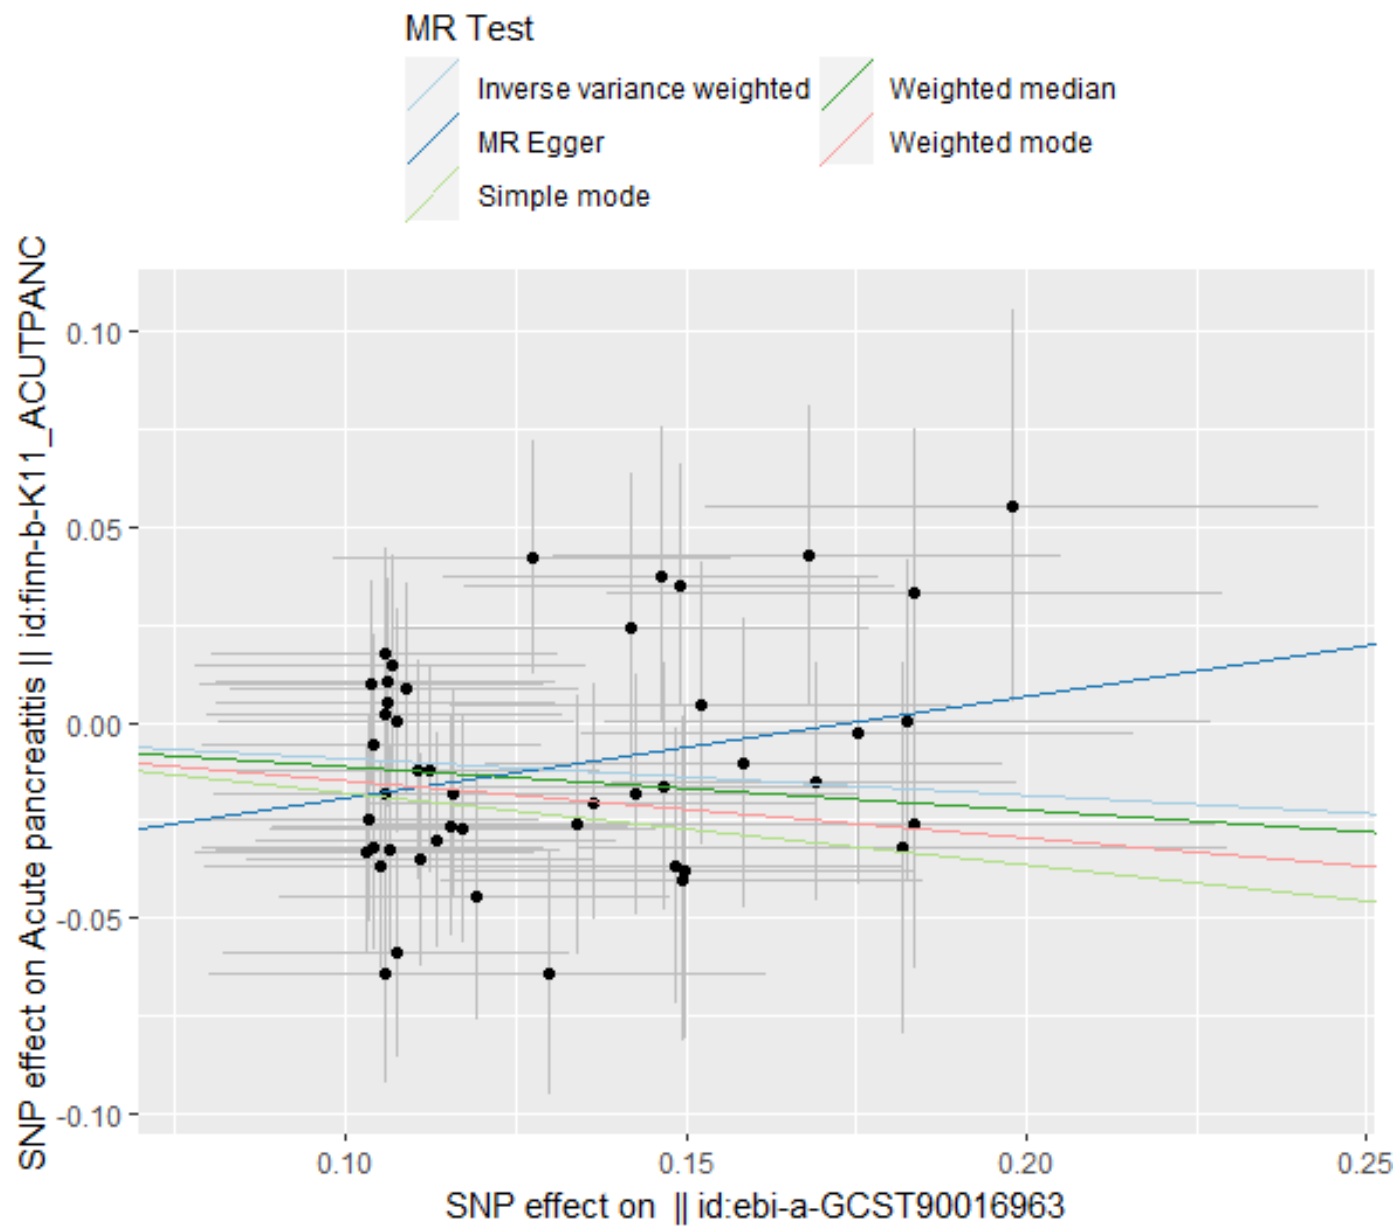



**Figure 199** Leave-one-out analysis, funnel plot, MR effect size and scatter plot for gut microbiota abundance (genus *Lachnoclostridium* id.11308) on acute pancreatitis

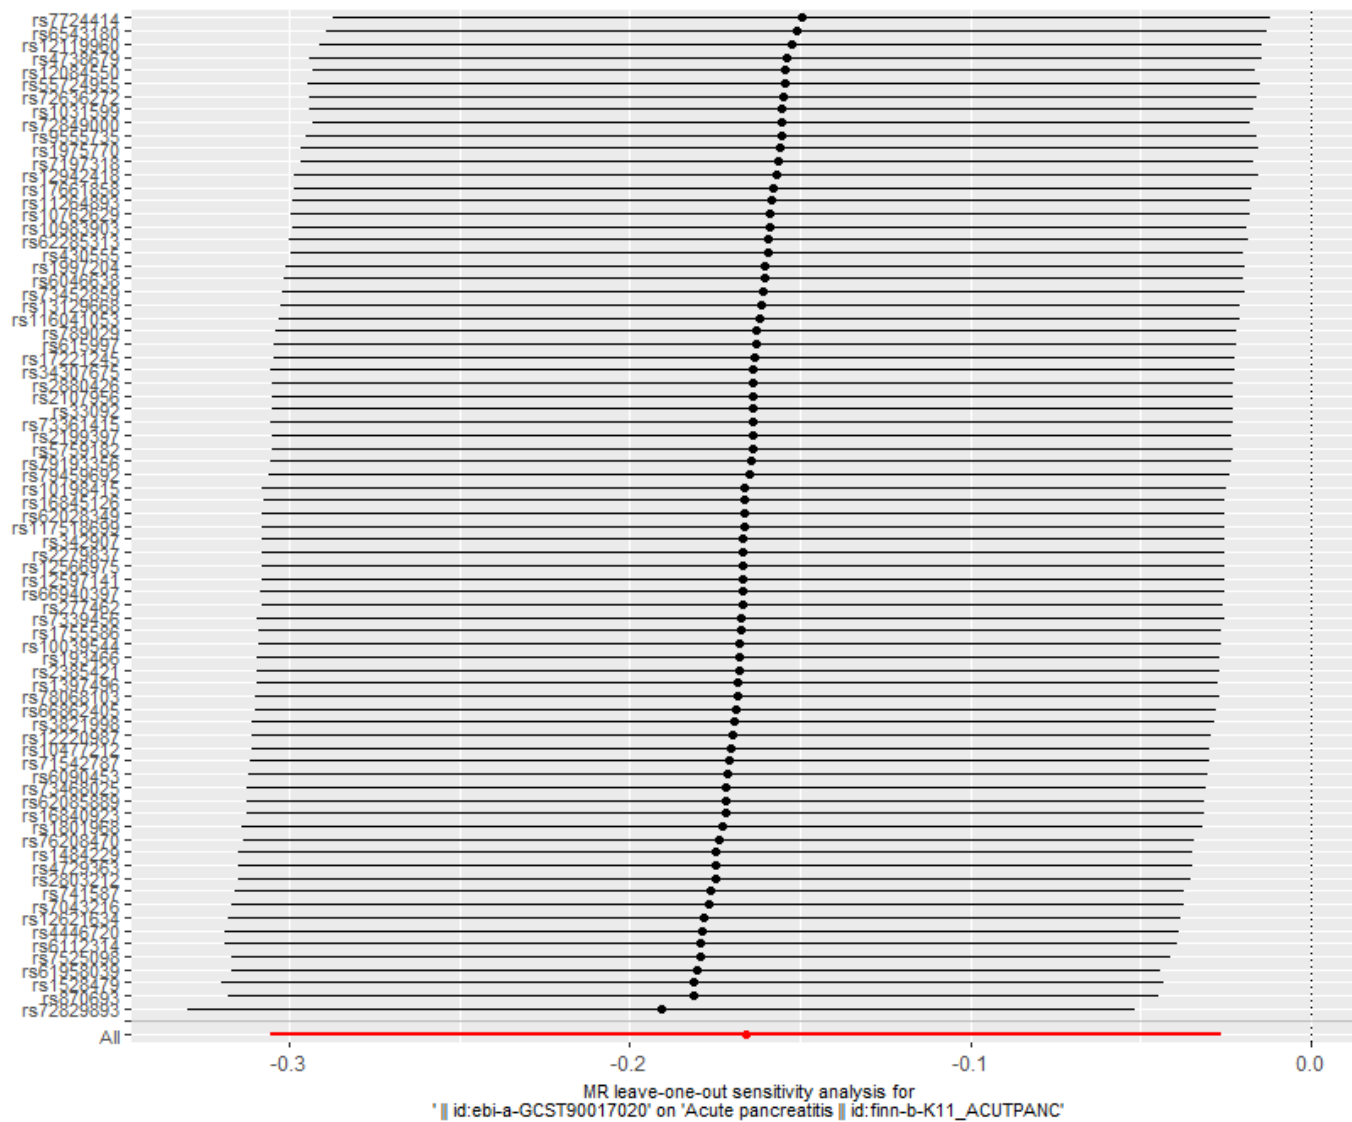

MR Method

- Inverse variance weighted
- MR Egger

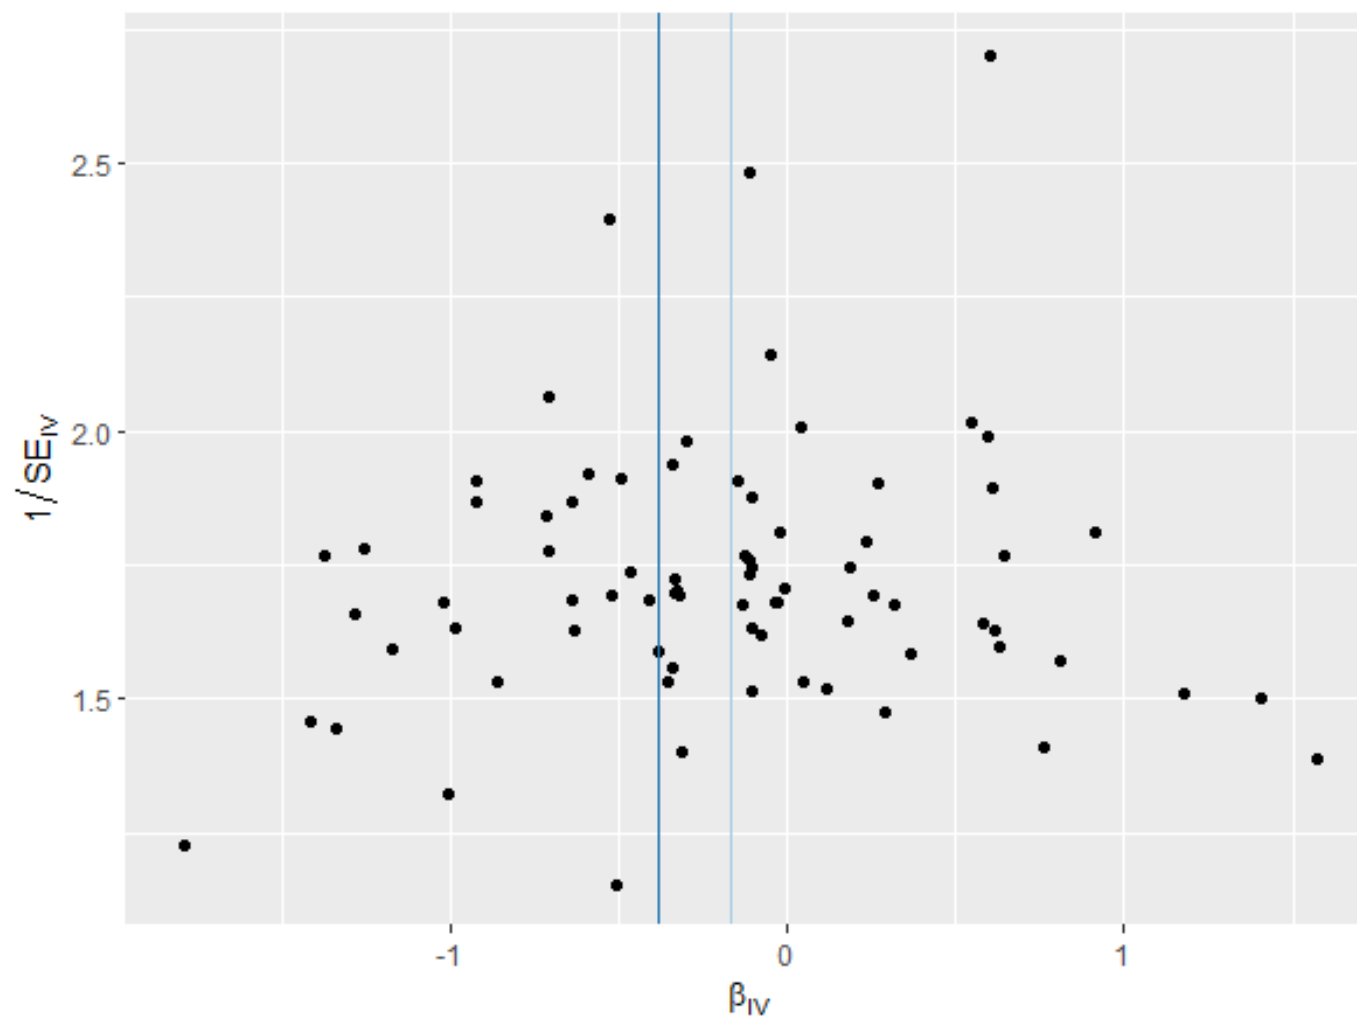

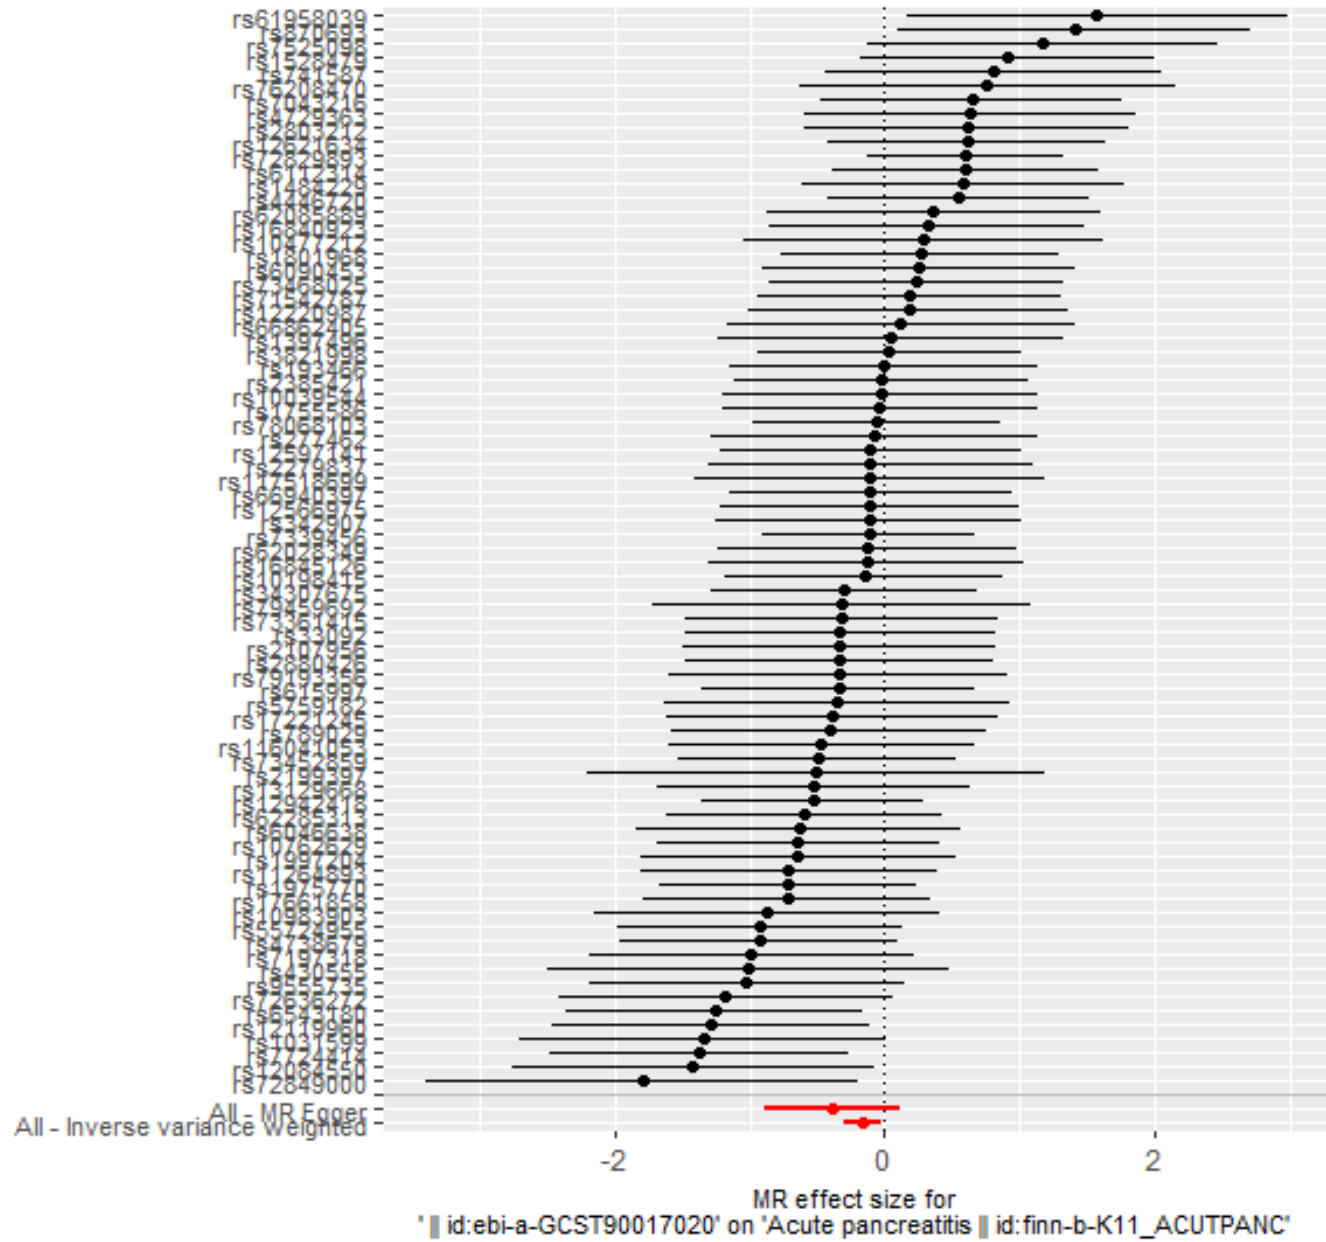

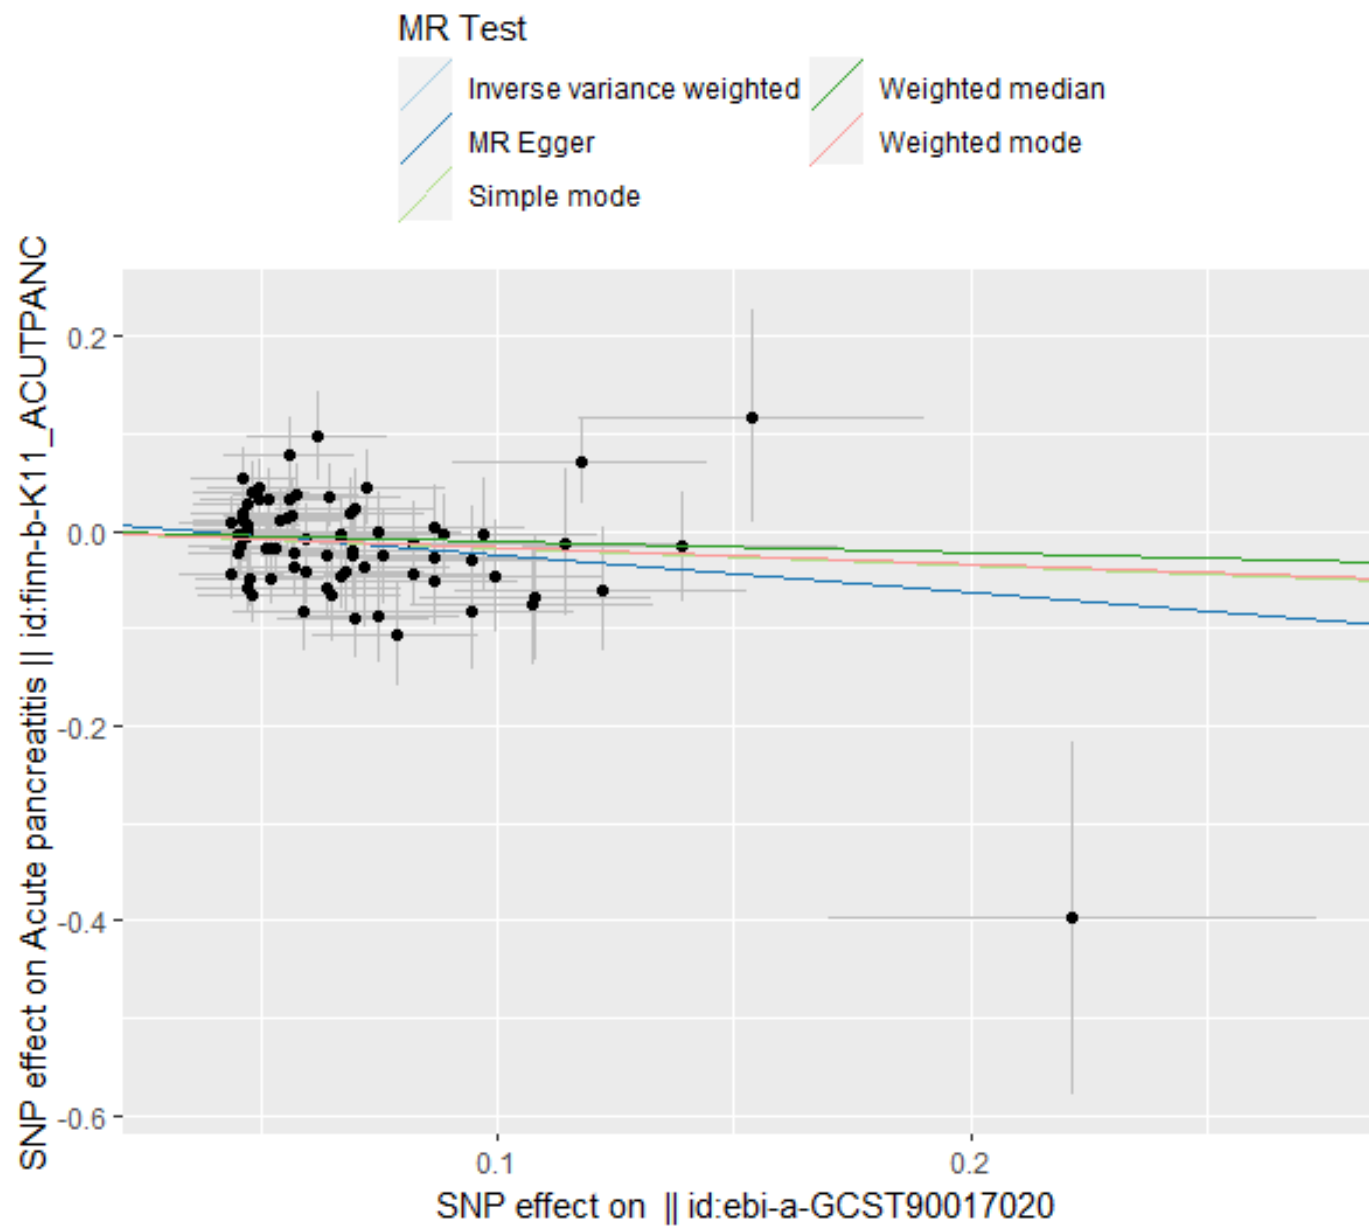

**Figure 200** Leave-one-out analysis, funnel plot, MR effect size and scatter plot for gut microbiota abundance (genus Ruminiclostridium6 id.11356) on acute pancreatitis

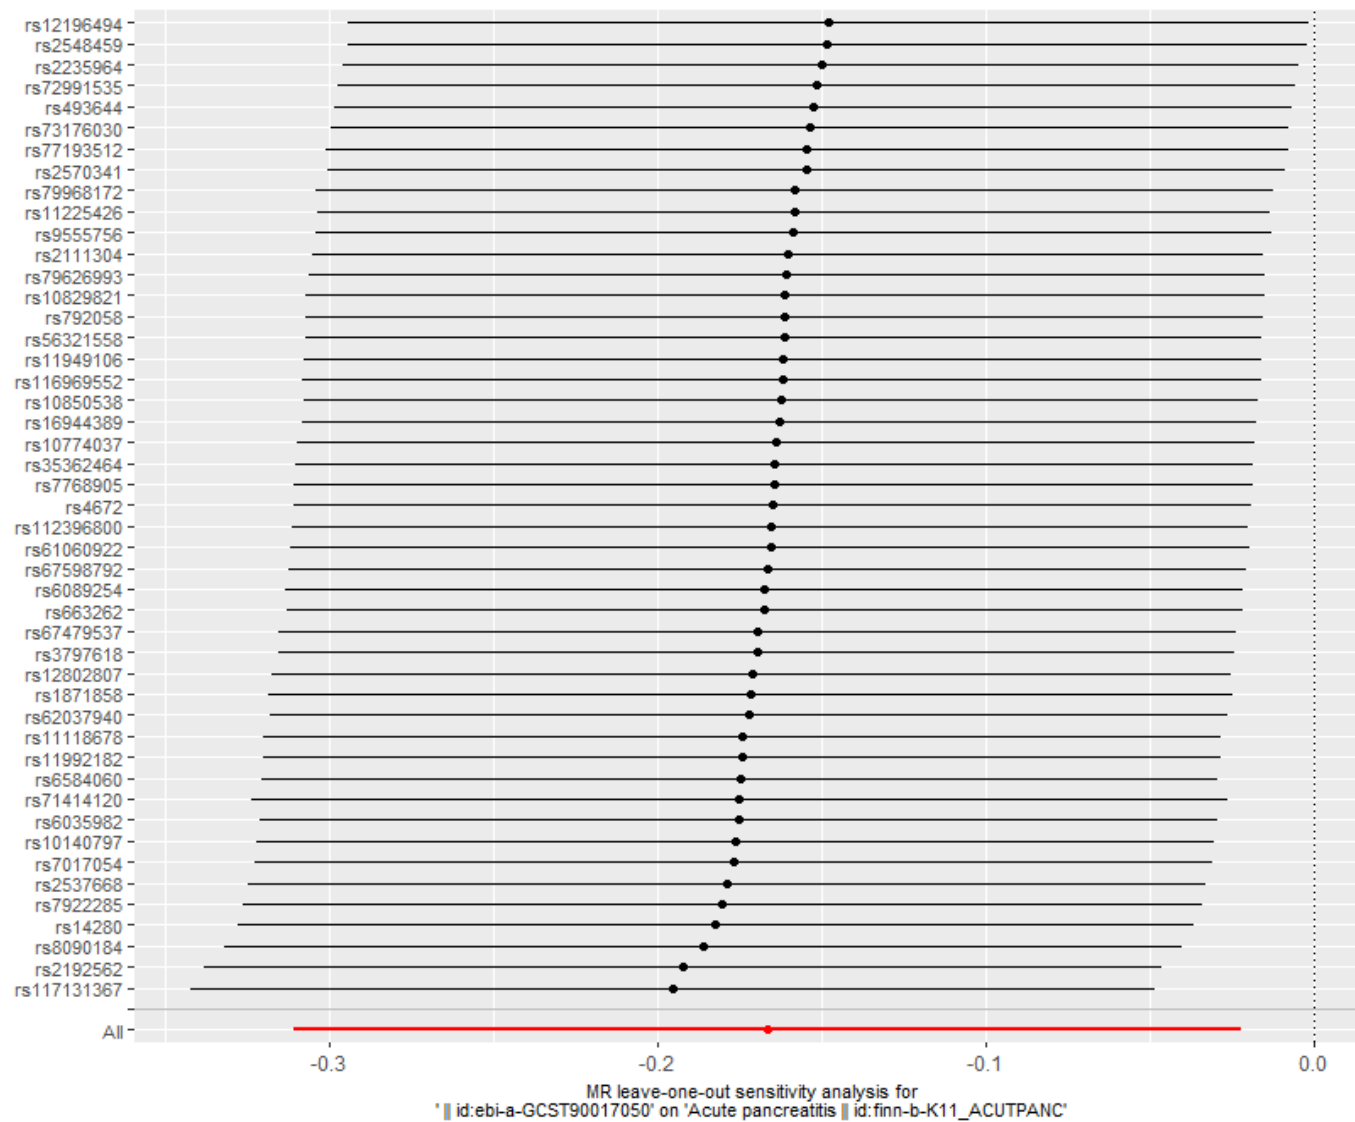

MR Method

- Inverse variance weighted
- MR Egger

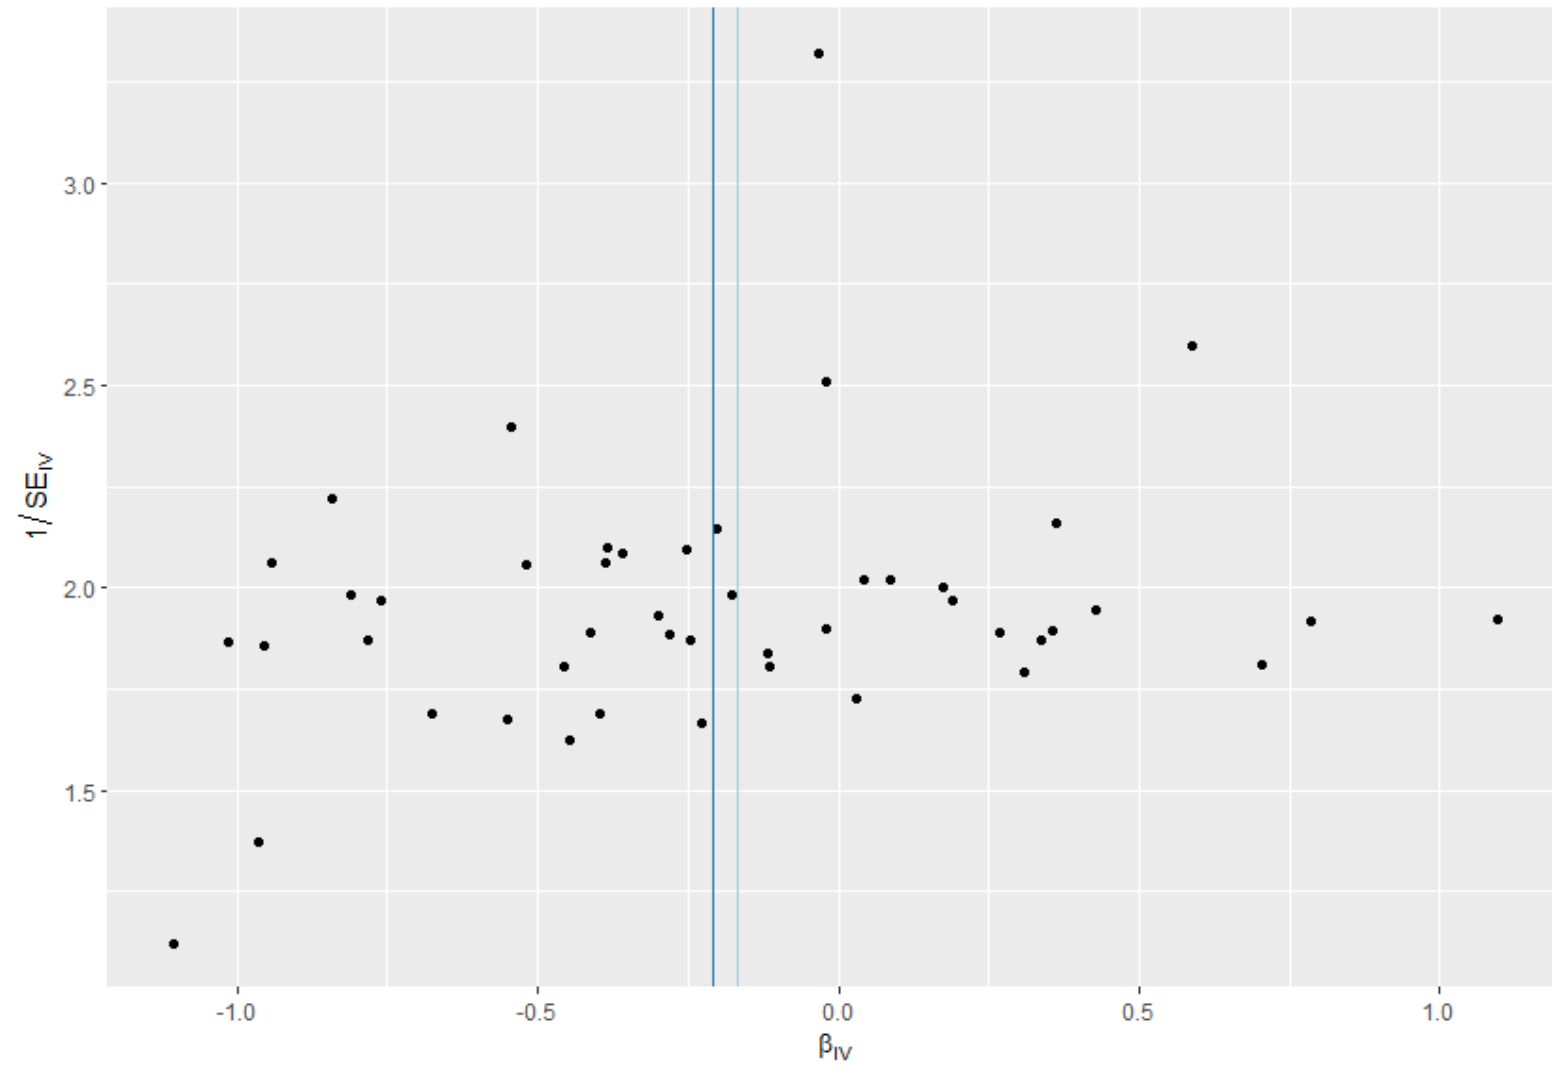

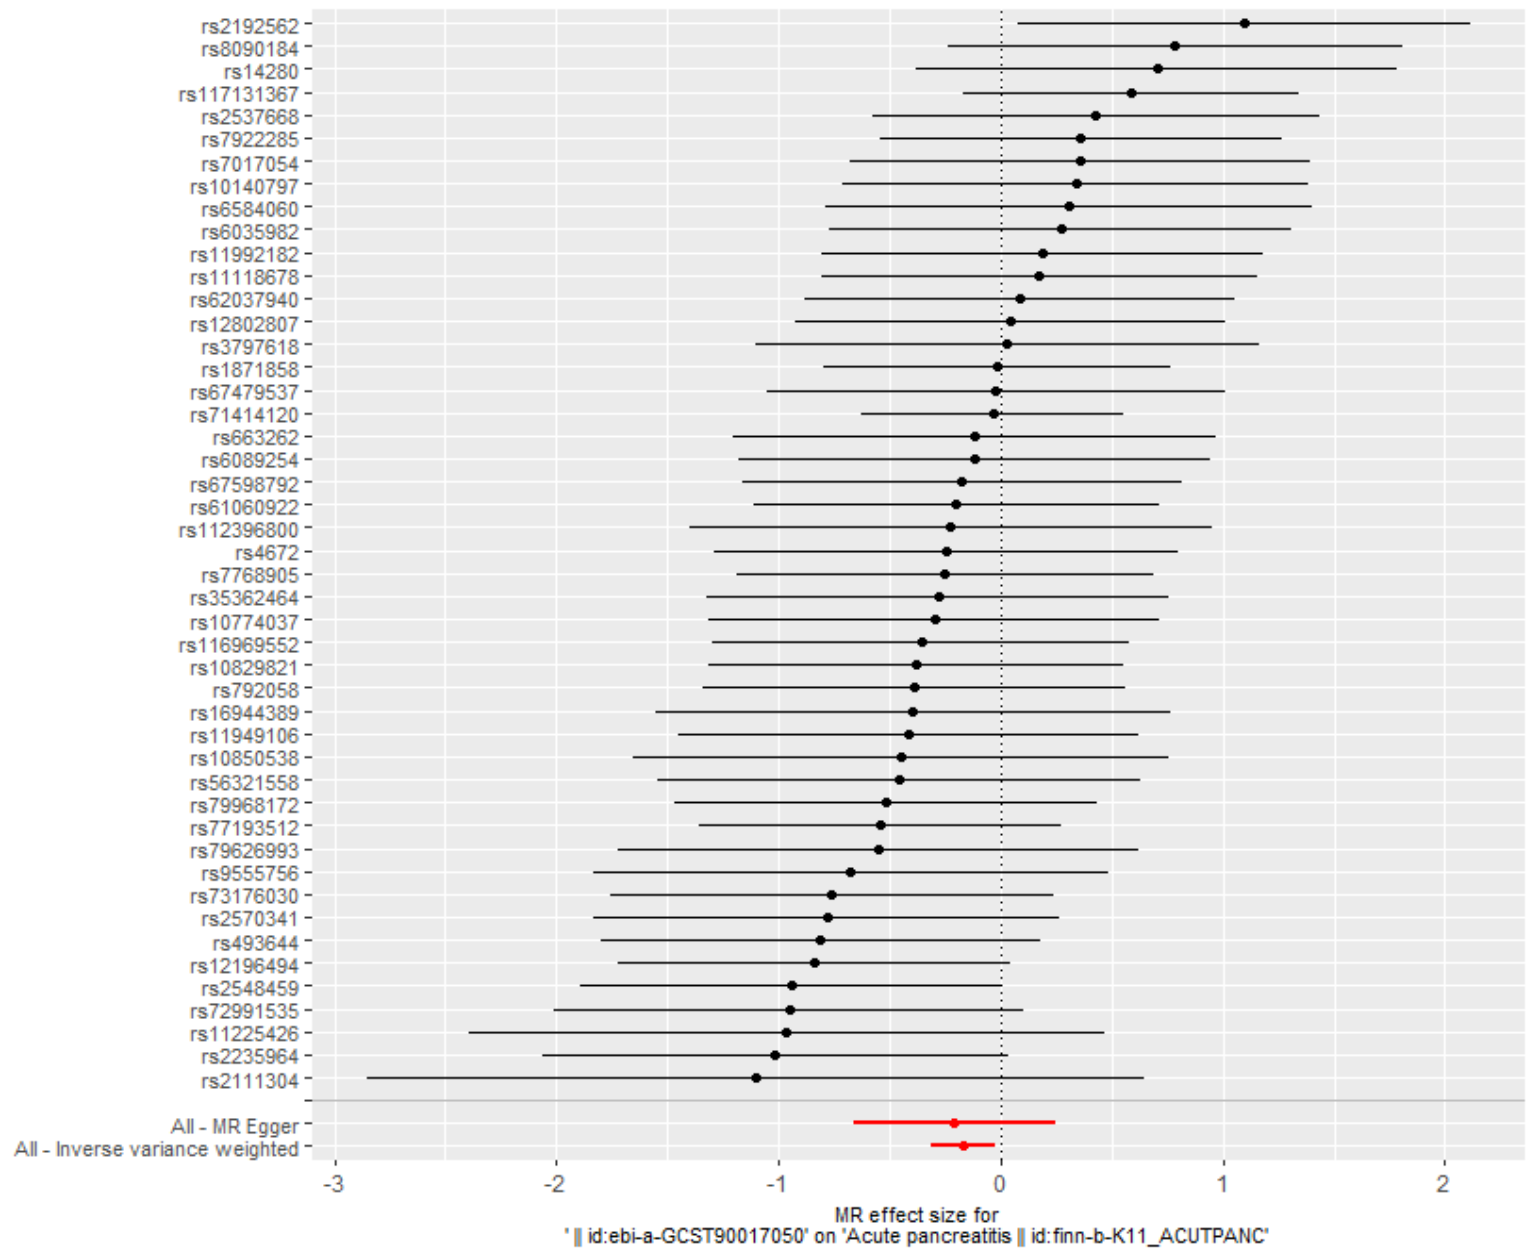

MR Test

- Inverse variance weighted
- MR Egger
- Simple mode
- Weighted median
- Weighted mode

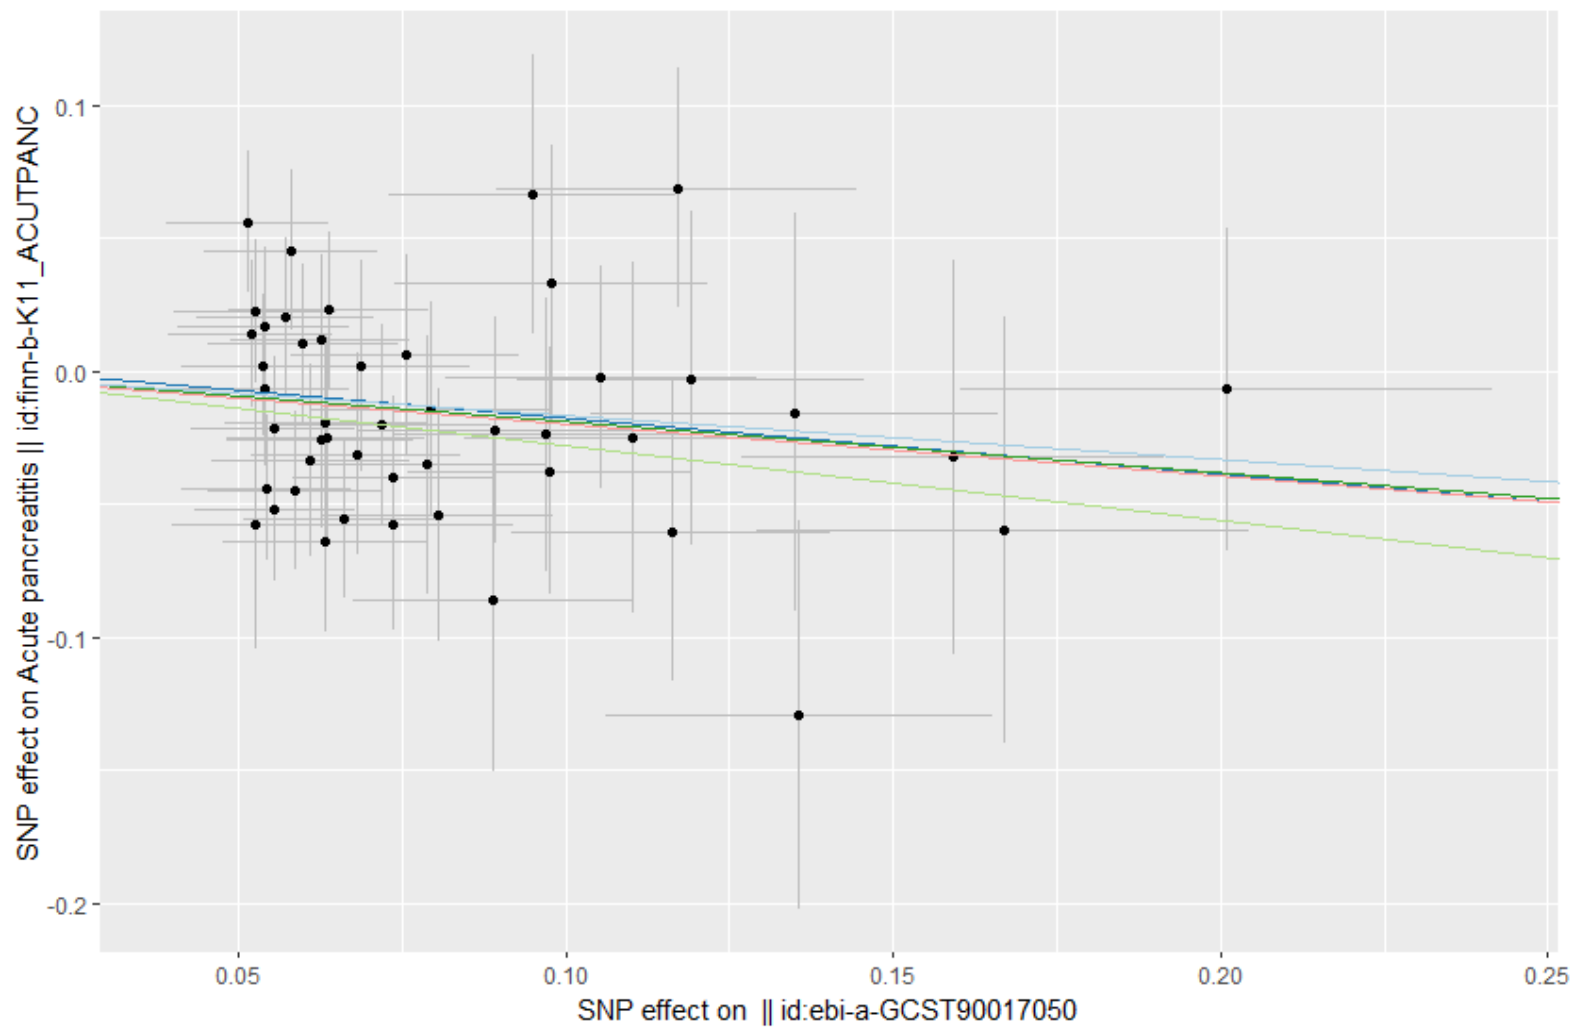



**Figure 201** Leave-one-out analysis, funnel plot, MR effect size and scatter plot for gut microbiota abundance (genus Ruminococcaceae UCG010 id.11367) on acute pancreatitis

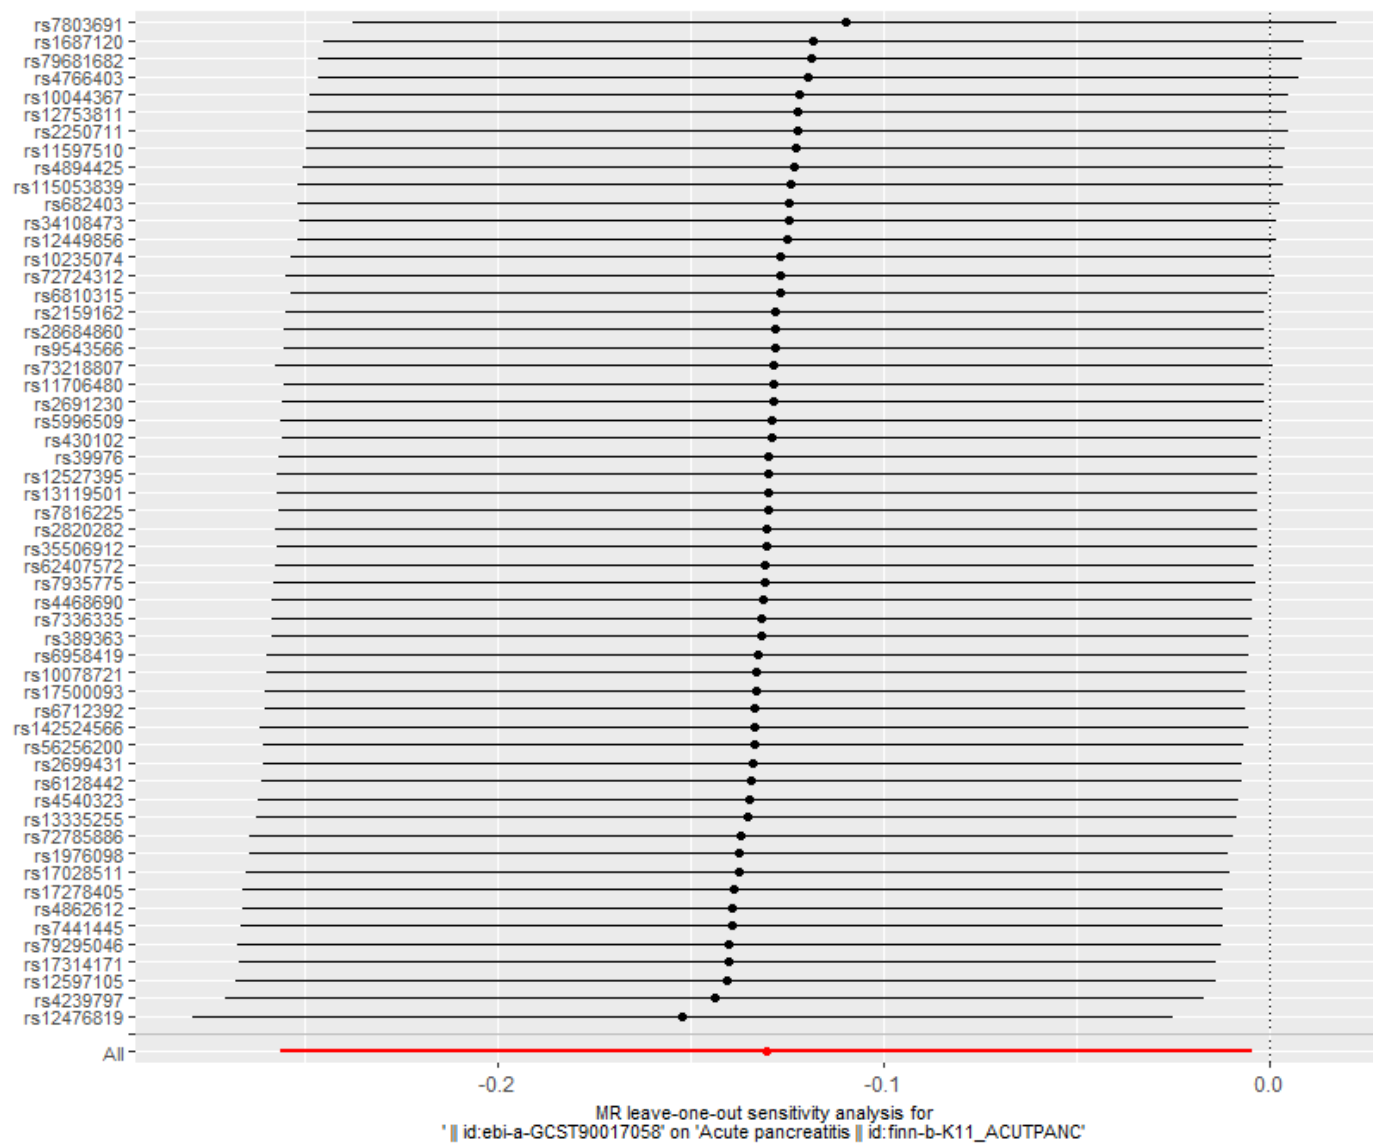

MR Method

- Inverse variance weighted
- MR Egger

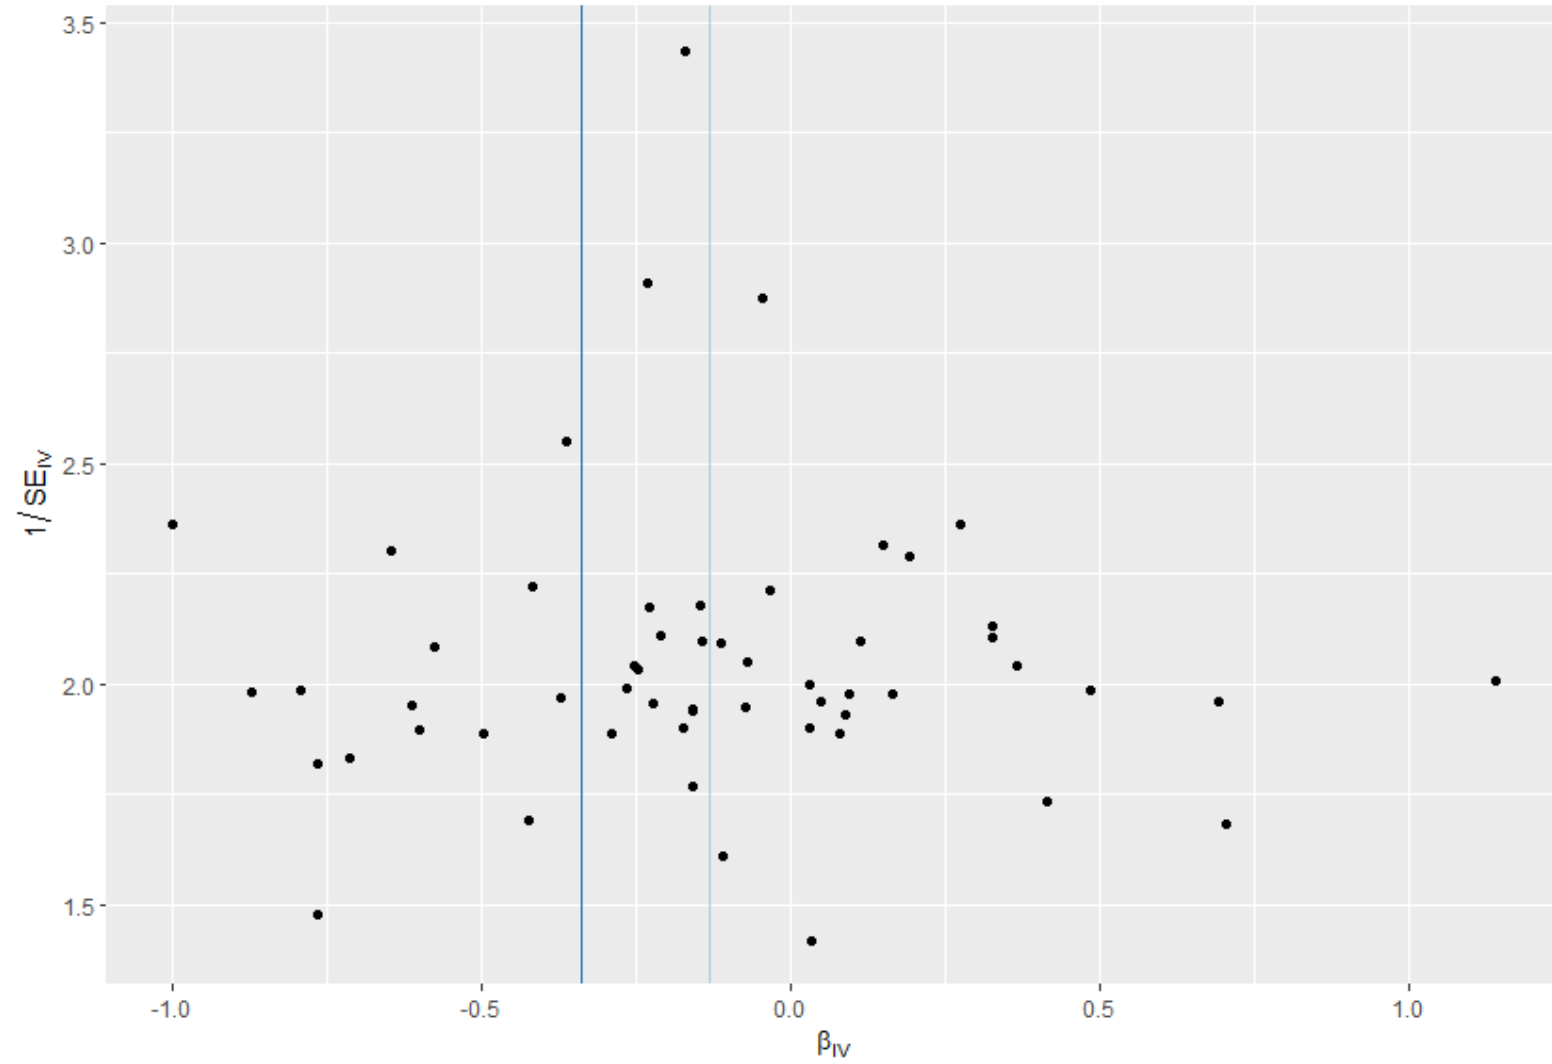

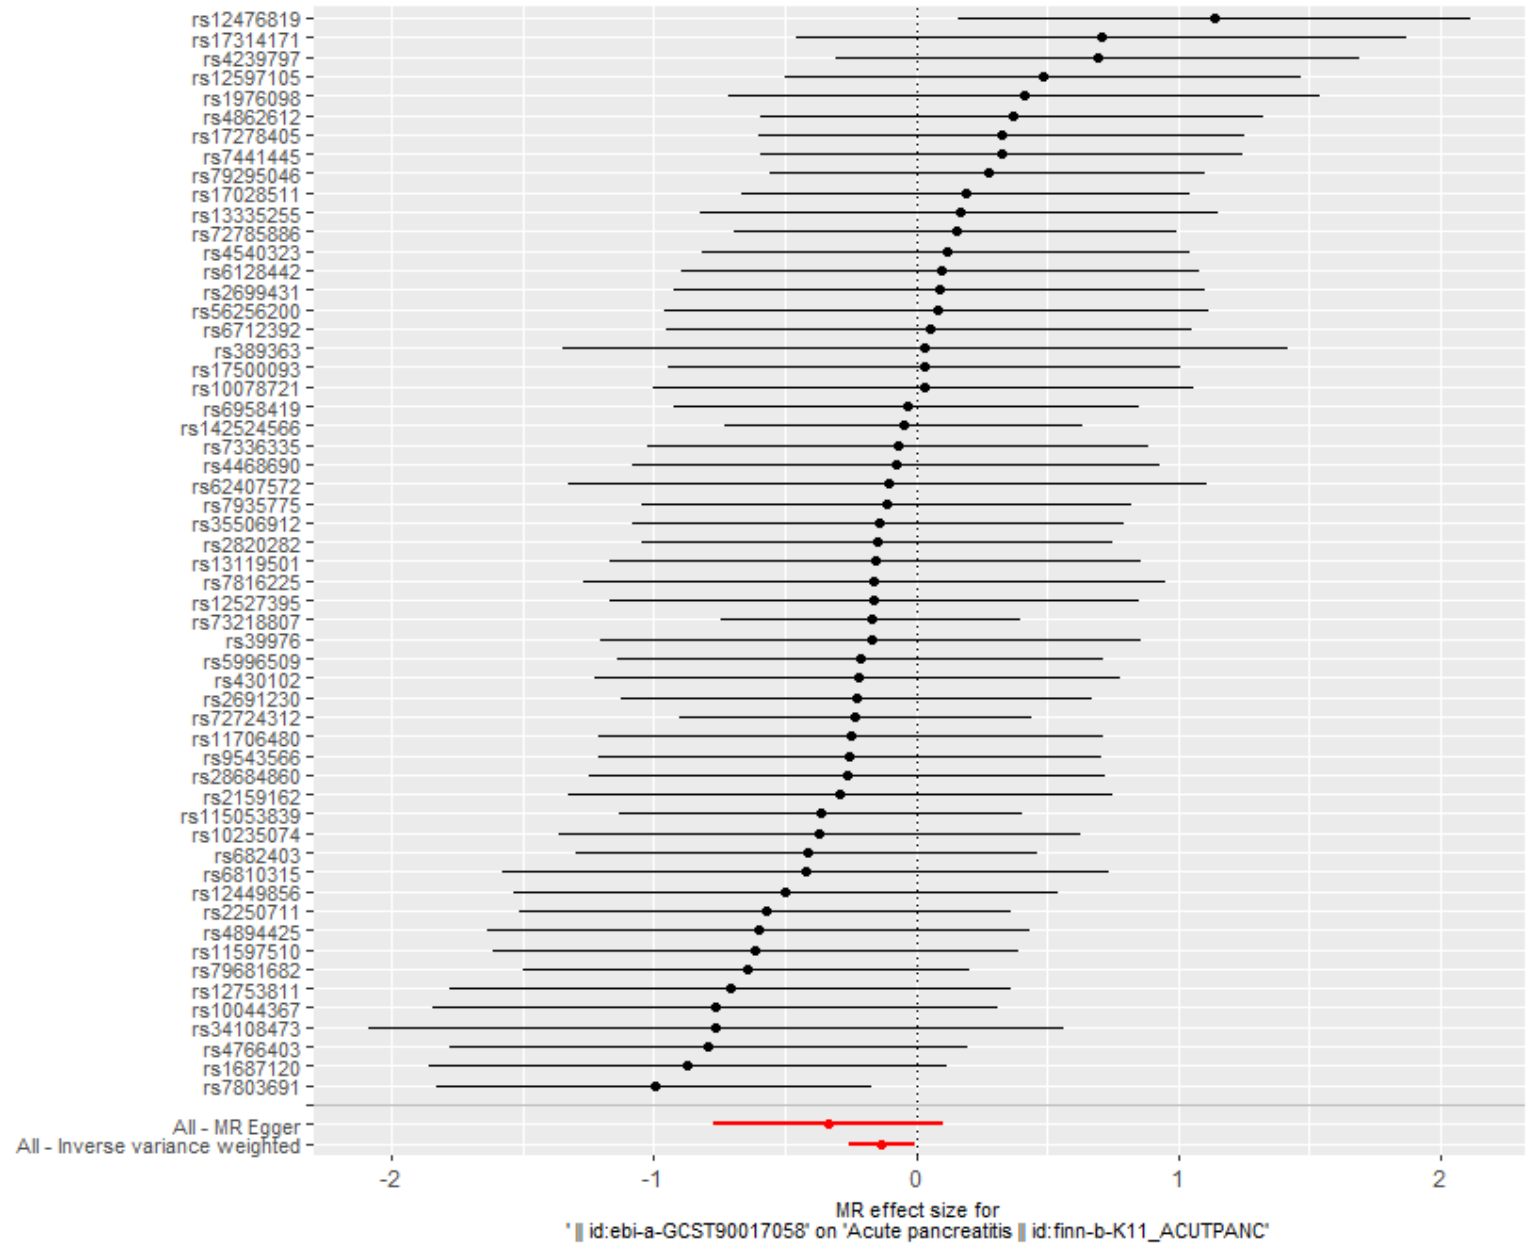

MR Test

- Inverse variance weighted
- MR Egger
- Simple mode
- Weighted median
- Weighted mode

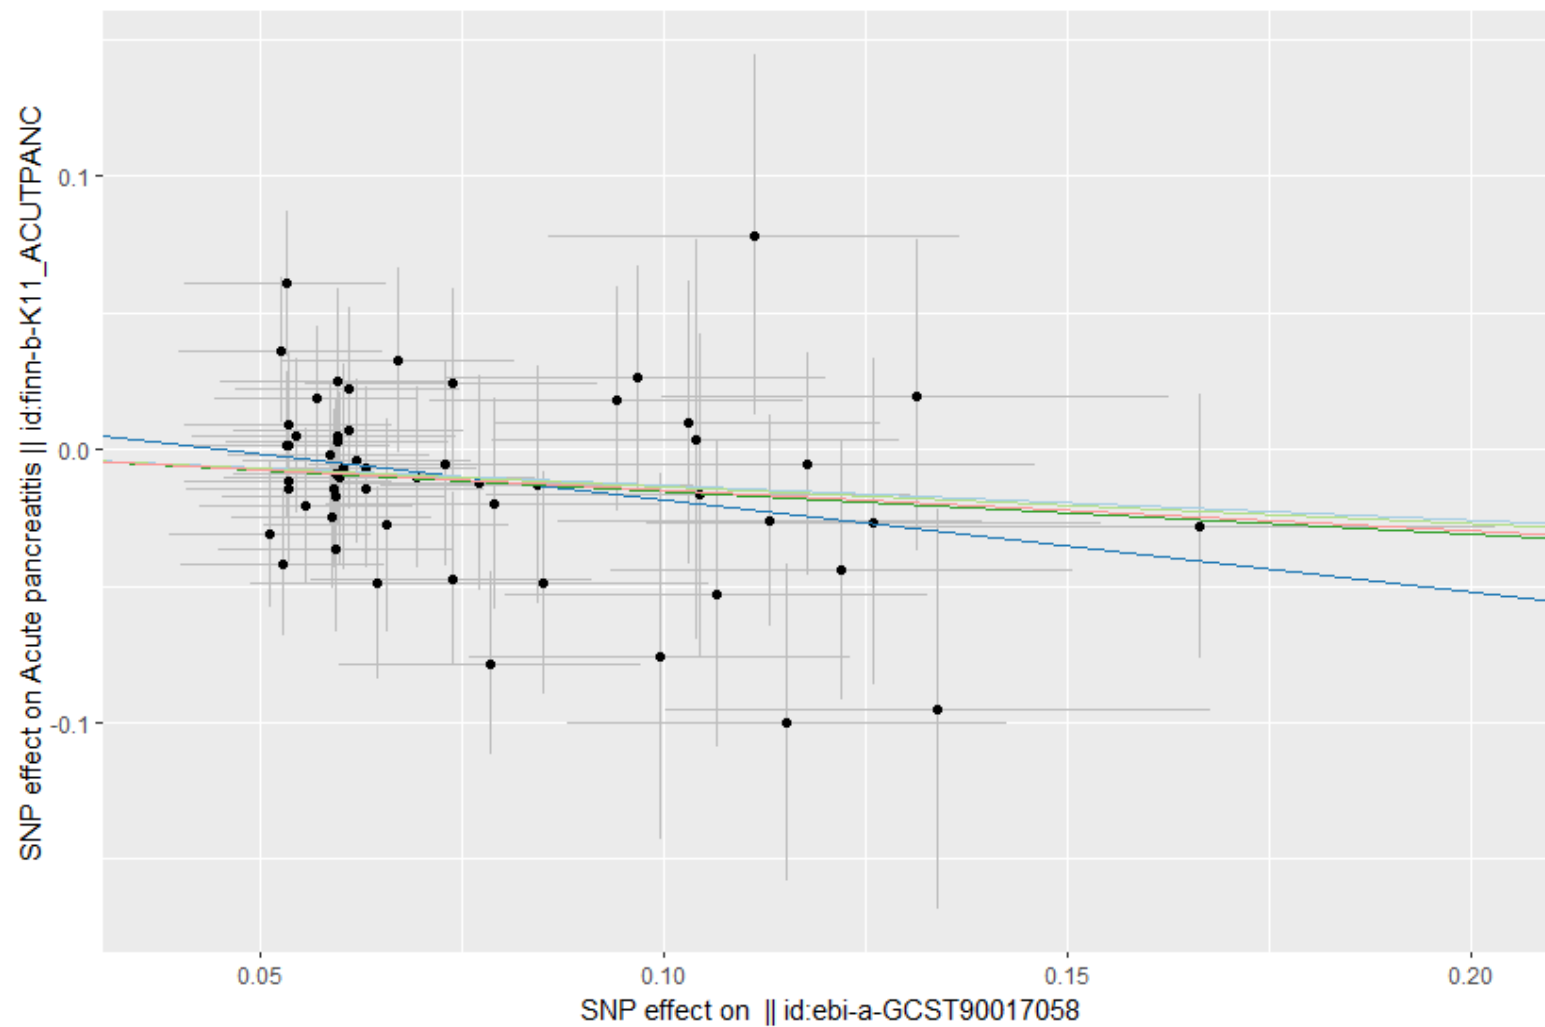

**Figure 202** Leave-one-out analysis, funnel plot, MR effect size and scatter plot for gut microbiota abundance (genus Ruminococcaceae UCG014 id.11371) on acute pancreatitis

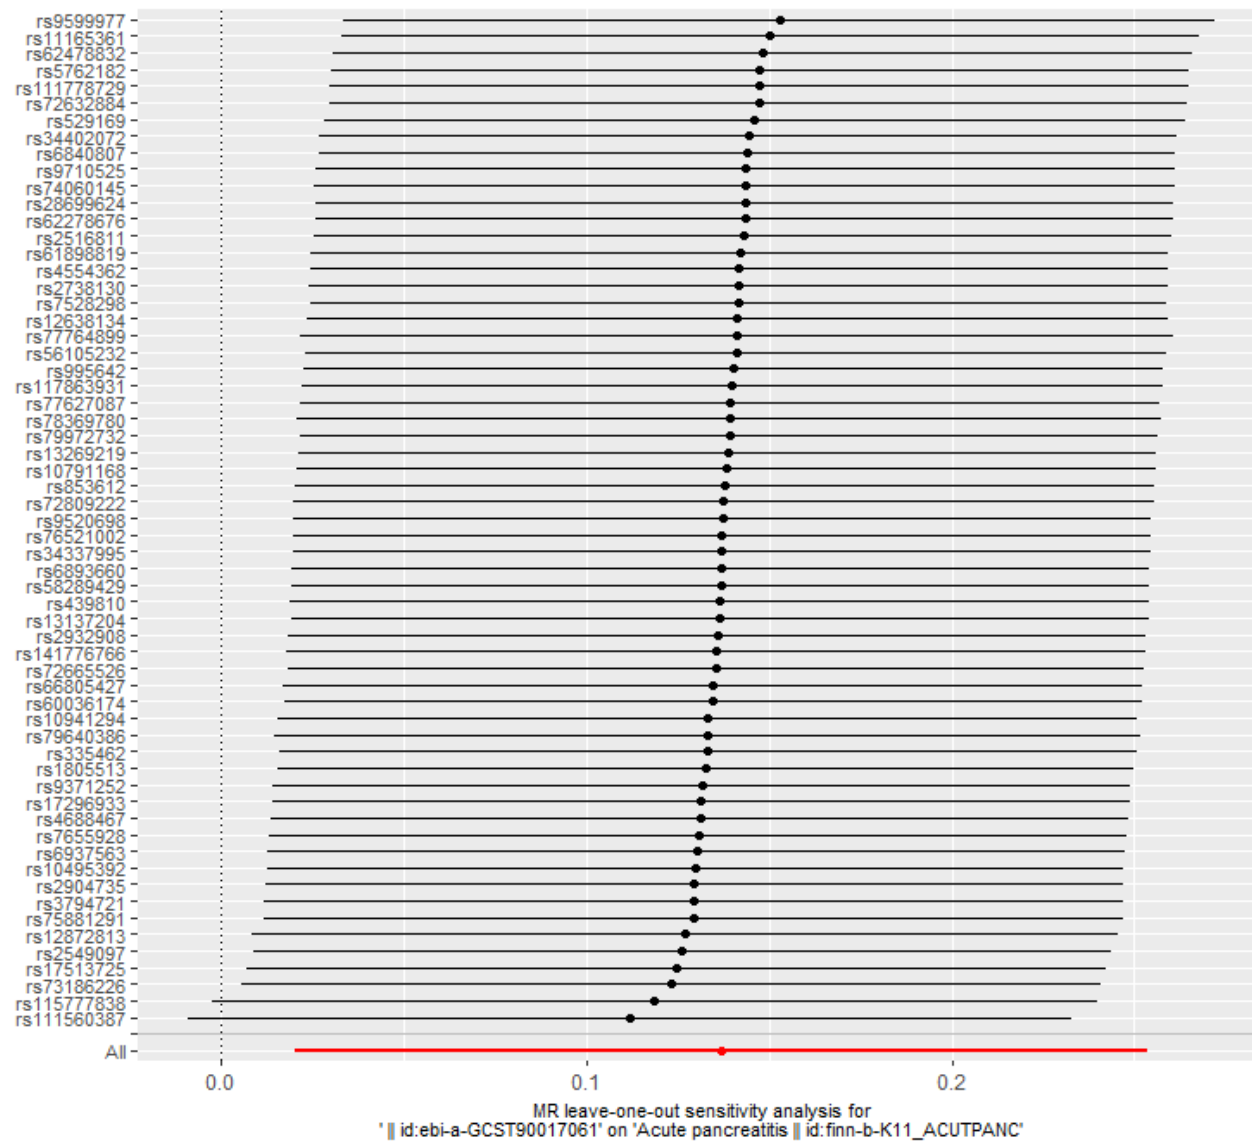

MR Method

- Inverse variance weighted
- MR Egger

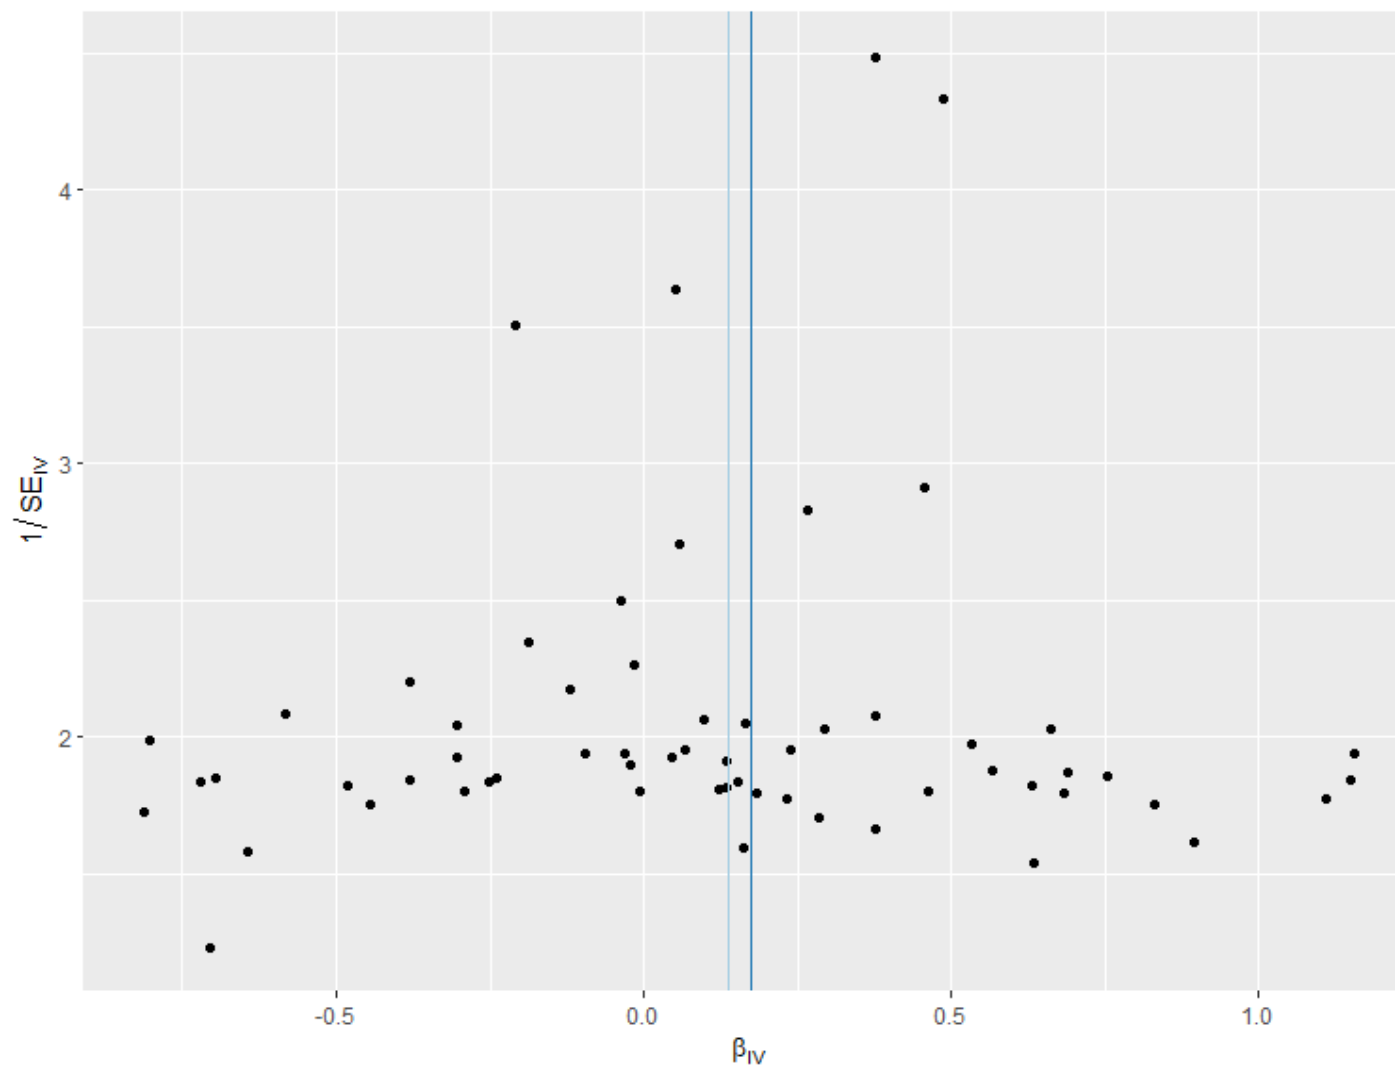

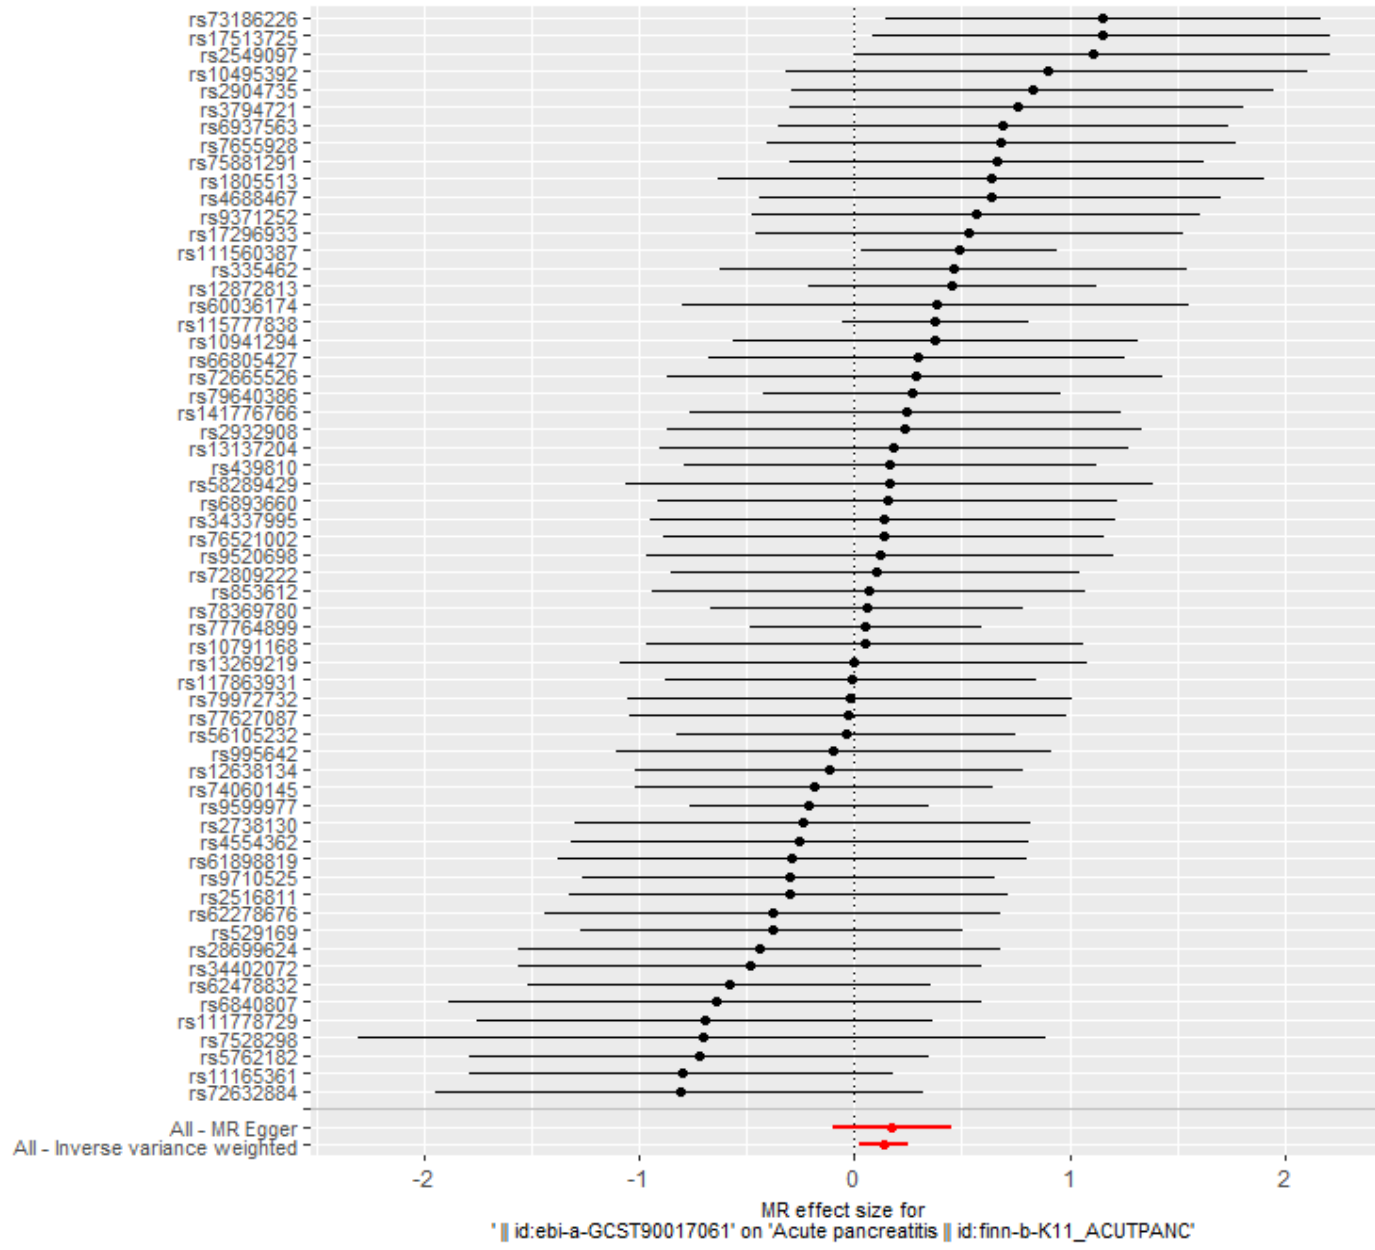

MR Test

- Inverse variance weighted
- MR Egger
- Simple mode
- Weighted median
- Weighted mode

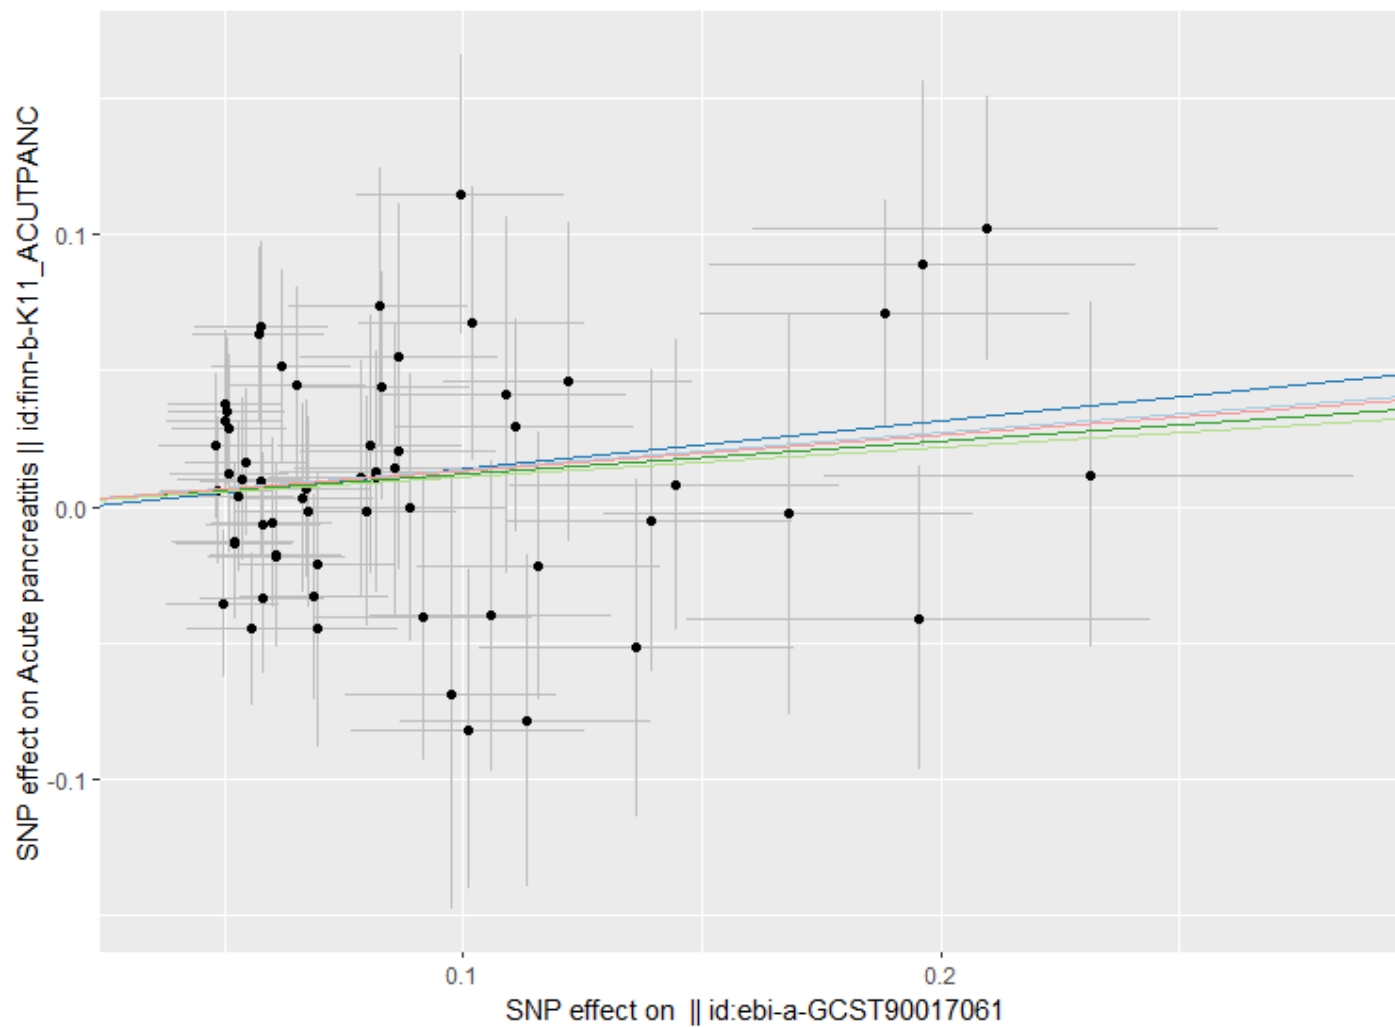



**Figure 203** Leave-one-out analysis, funnel plot, MR effect size and scatter plot for gut microbiota abundance (genus *Sellimonas* id.14369) on acute pancreatitis

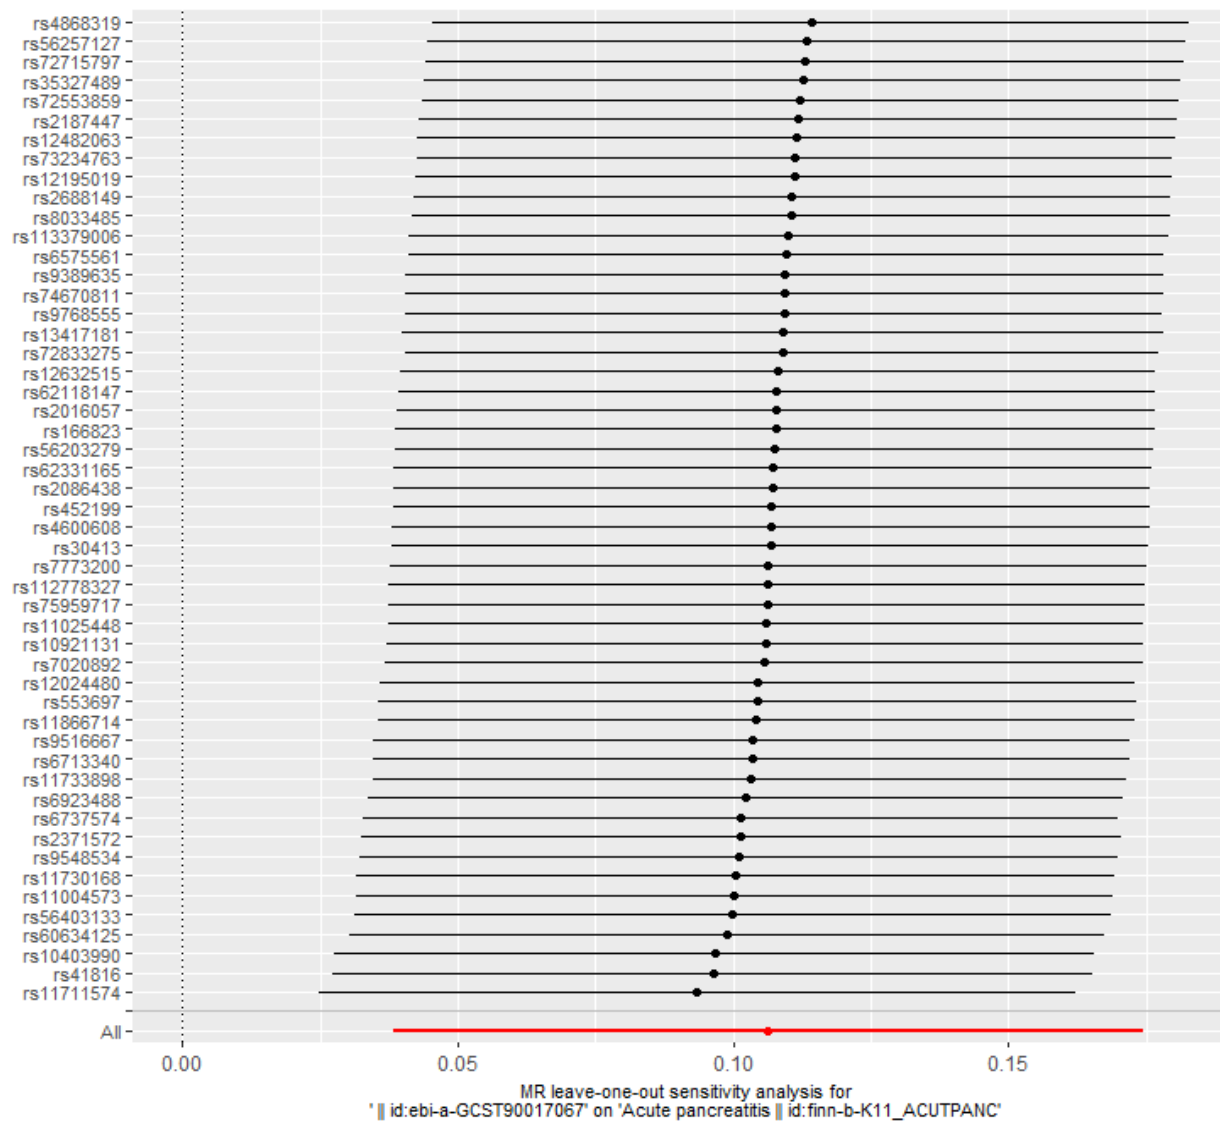

MR Method

- Inverse variance weighted
- MR Egger

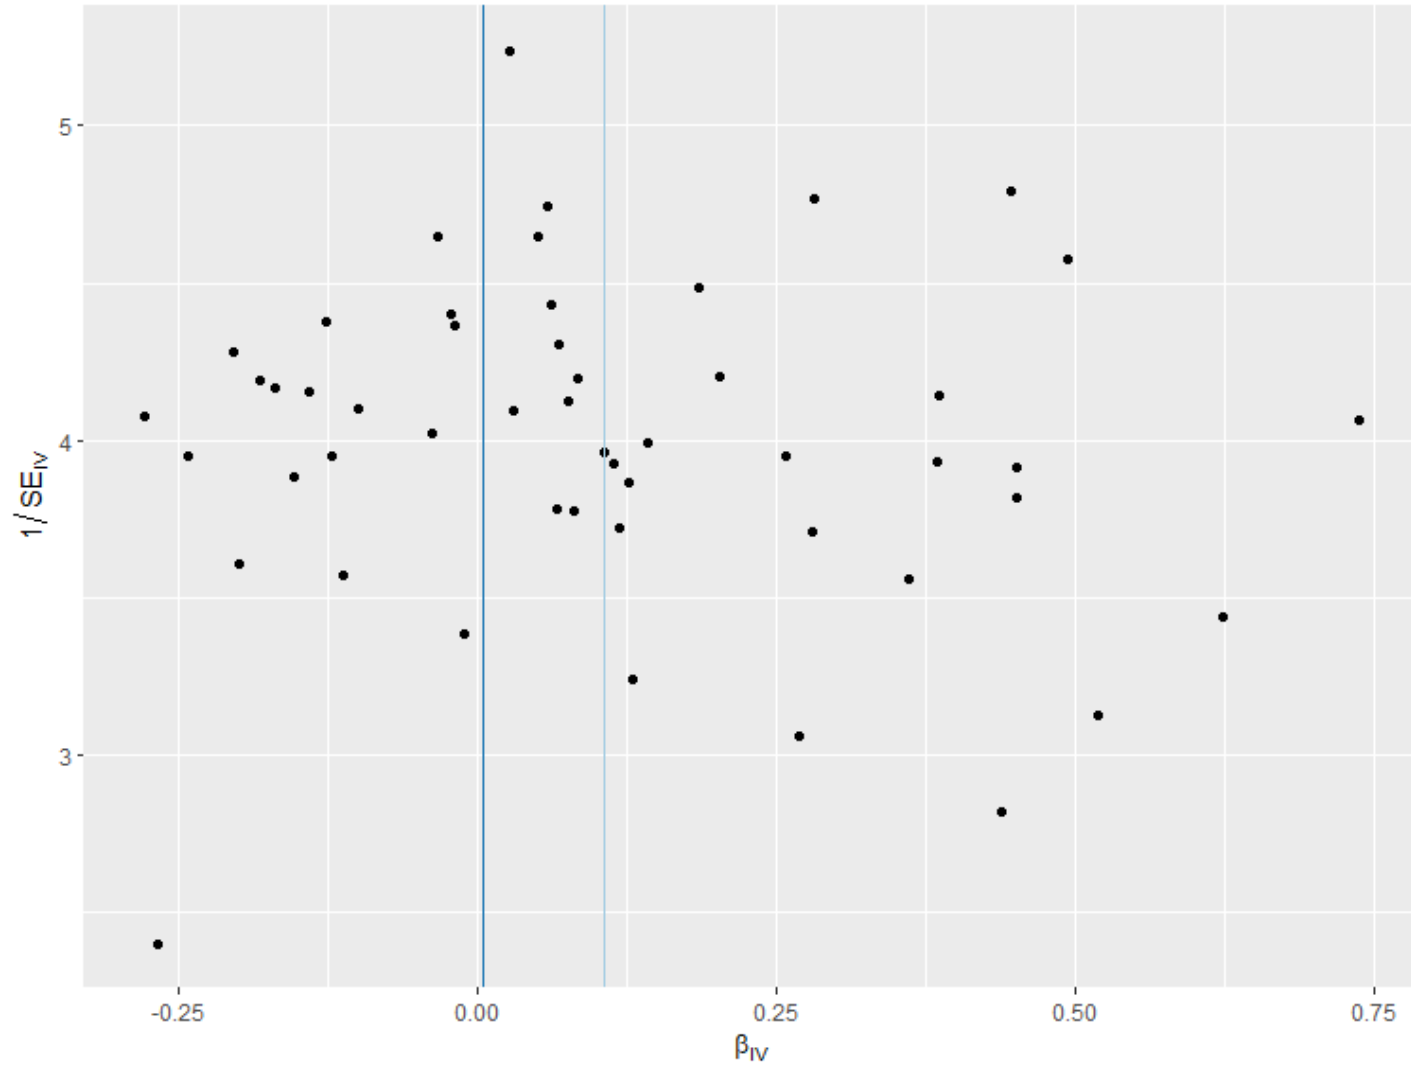

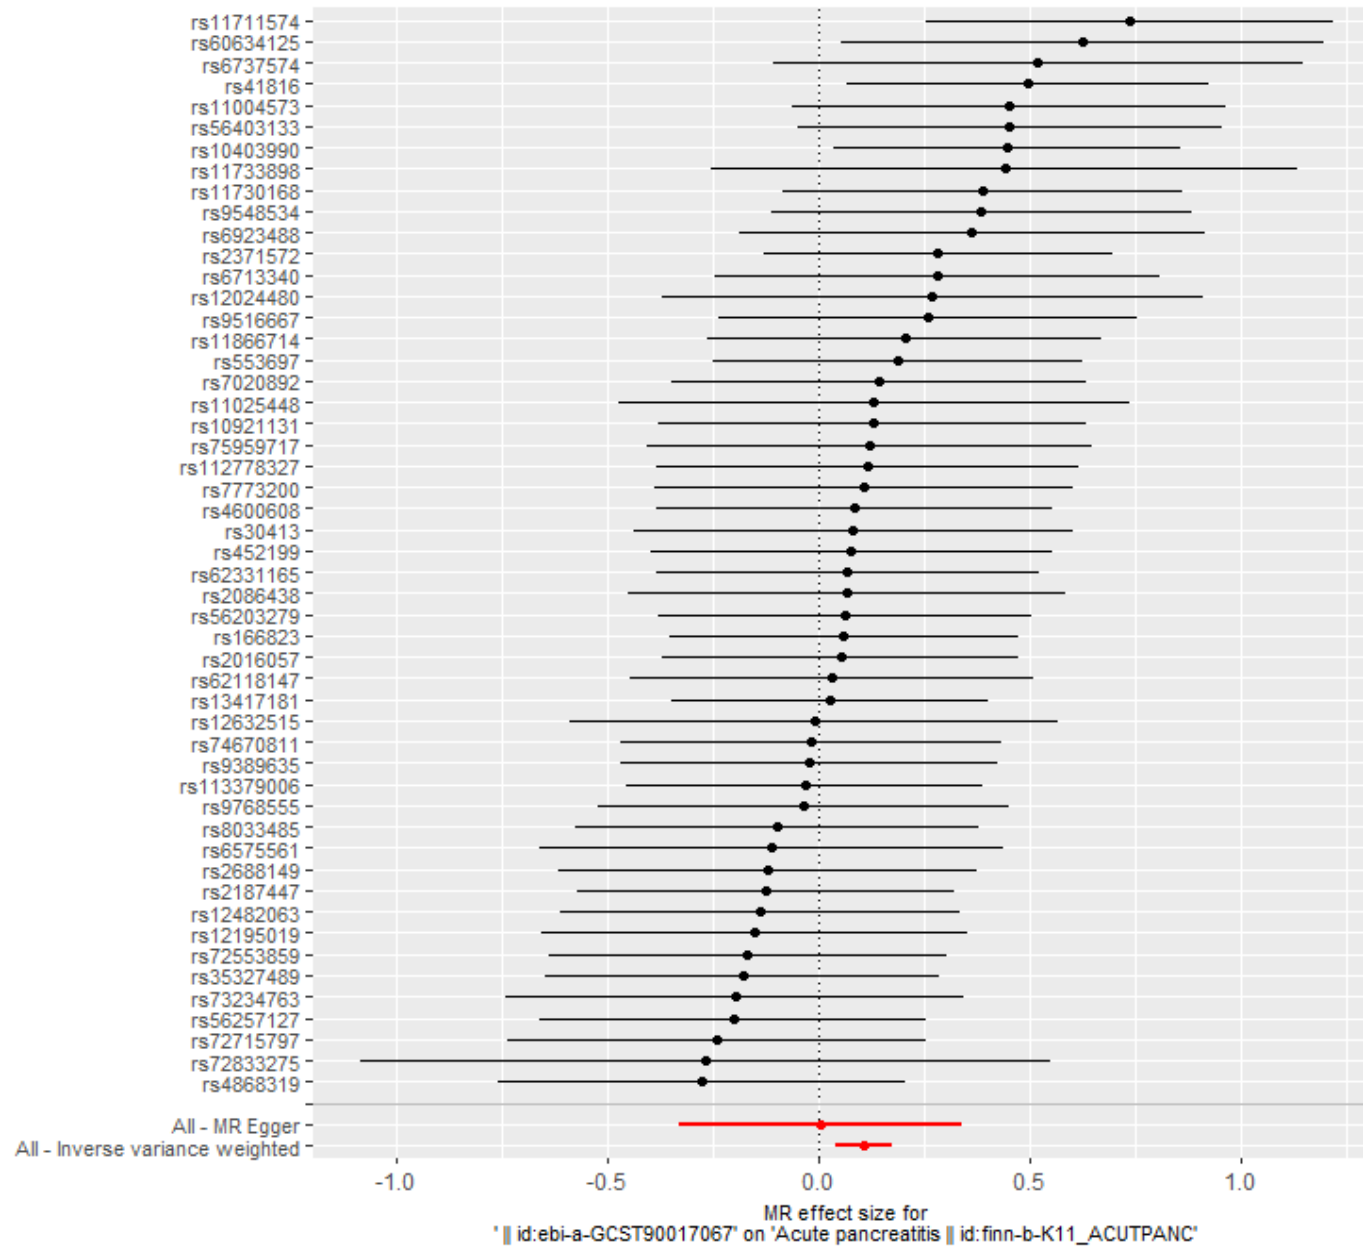

MR Test

- Inverse variance weighted
- MR Egger
- Simple mode
- Weighted median
- Weighted mode

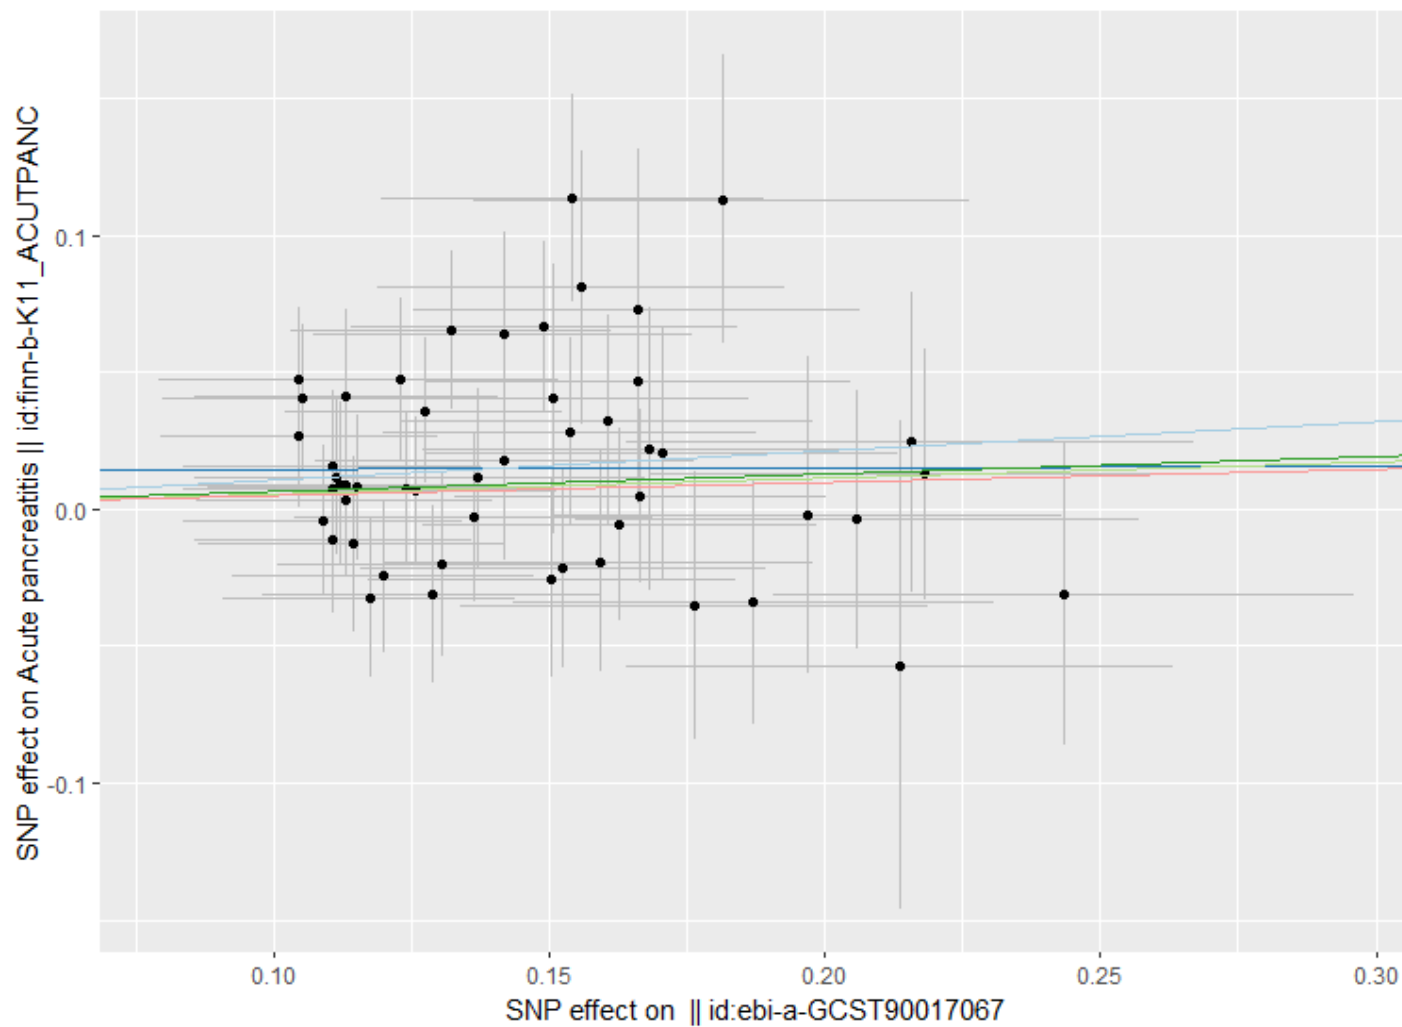

**Figure 204** Leave-one-out analysis, funnel plot, MR effect size and scatter plot for gut microbiota abundance (genus *Slackia* id.825) on acute pancreatitis

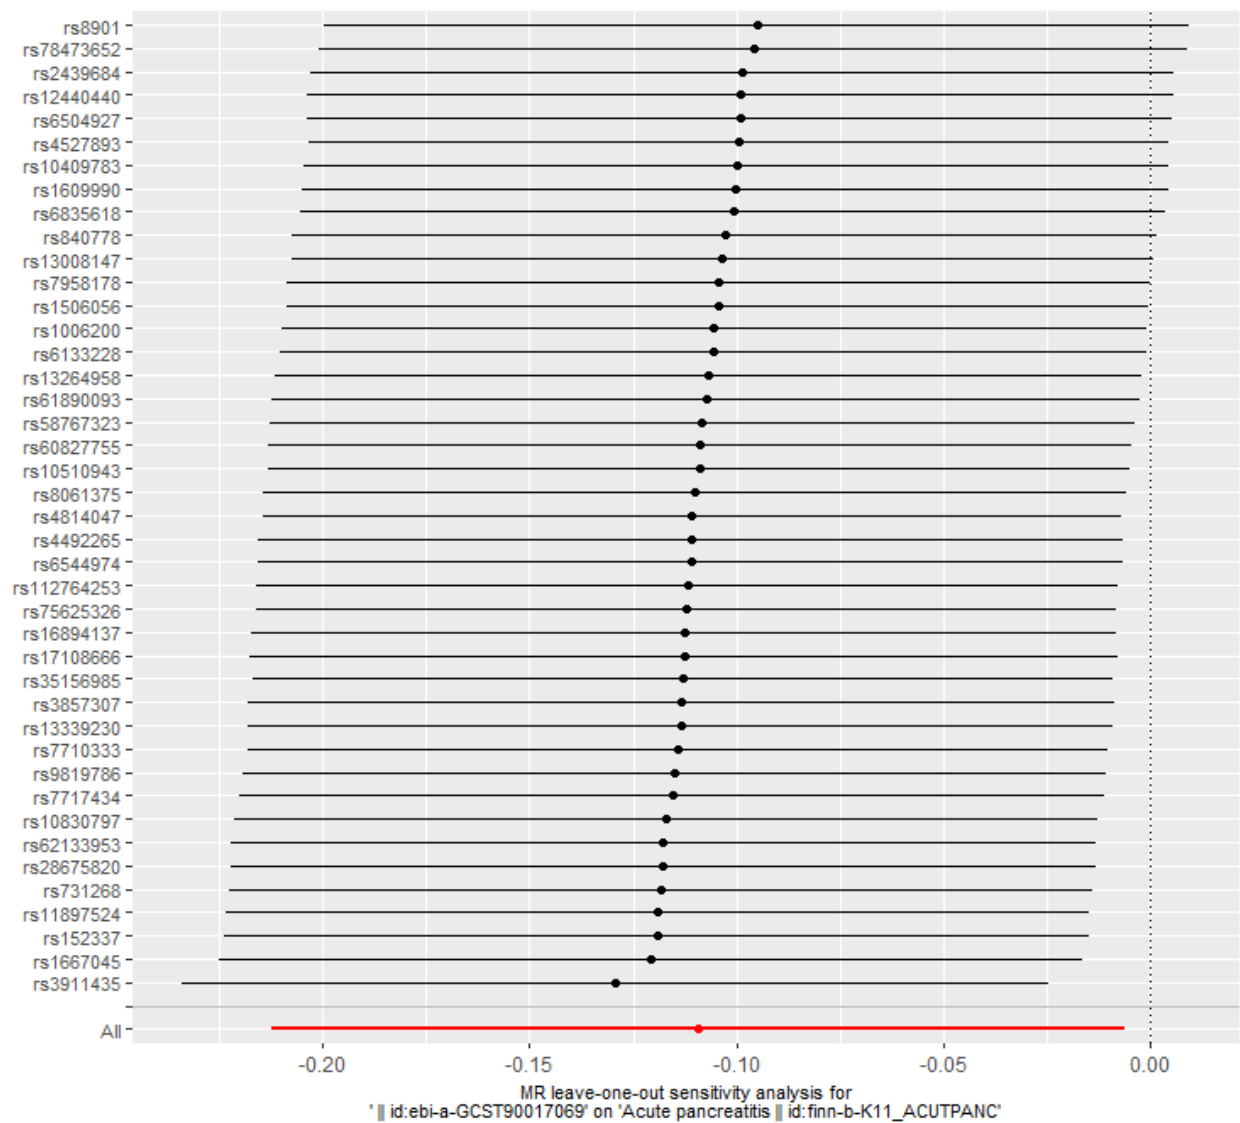

MR Method

- Inverse variance weighted
- MR Egger

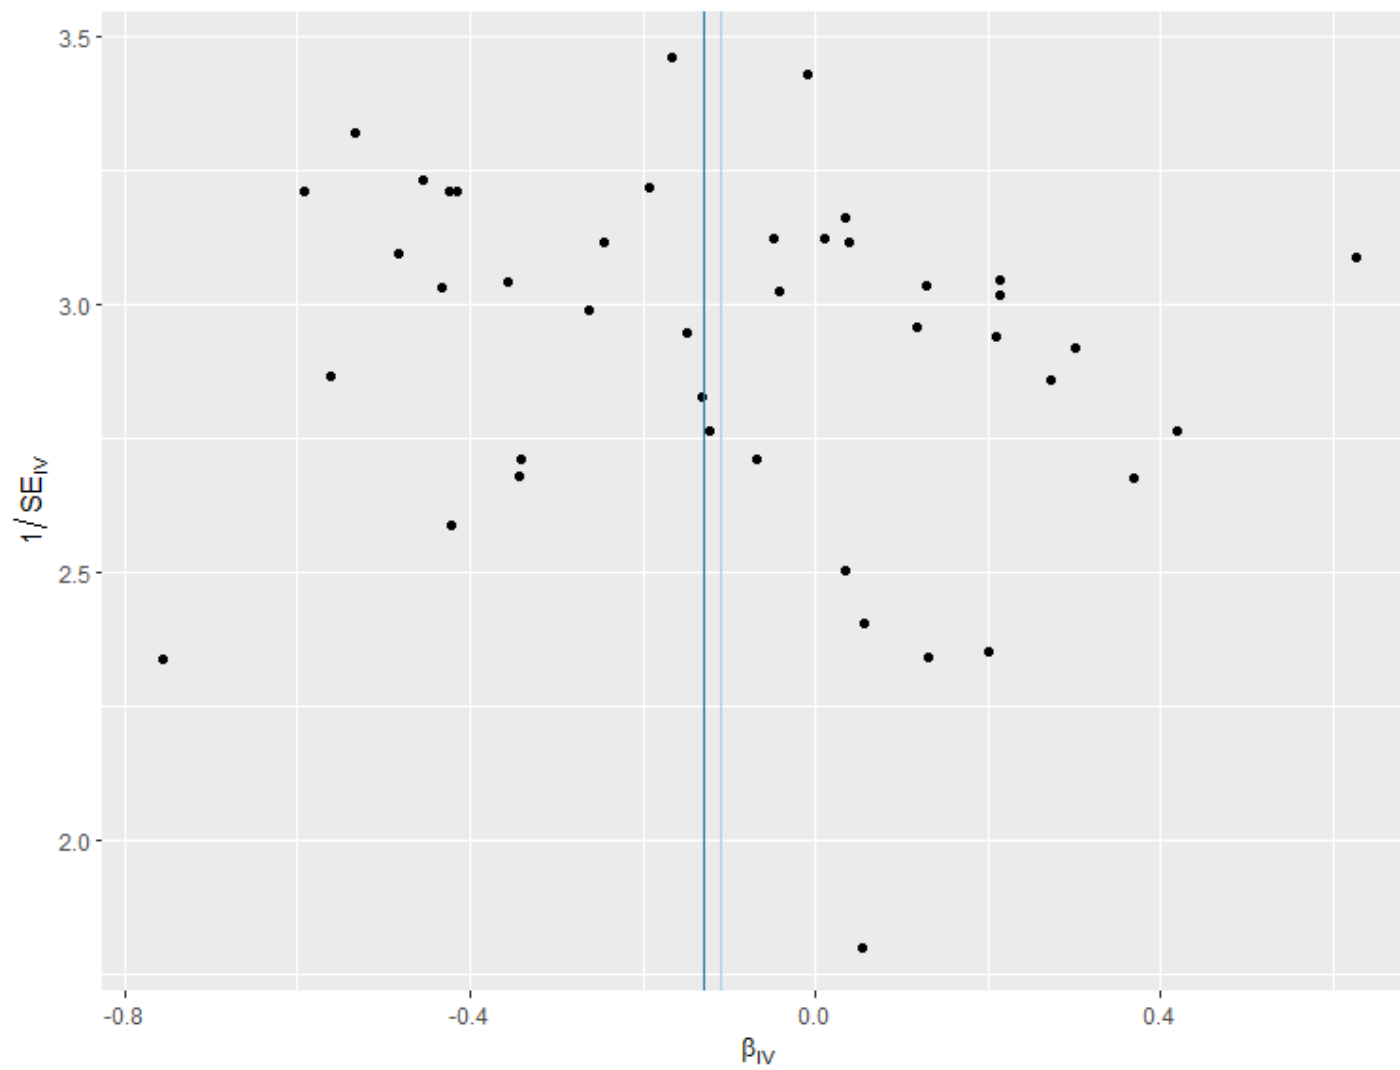

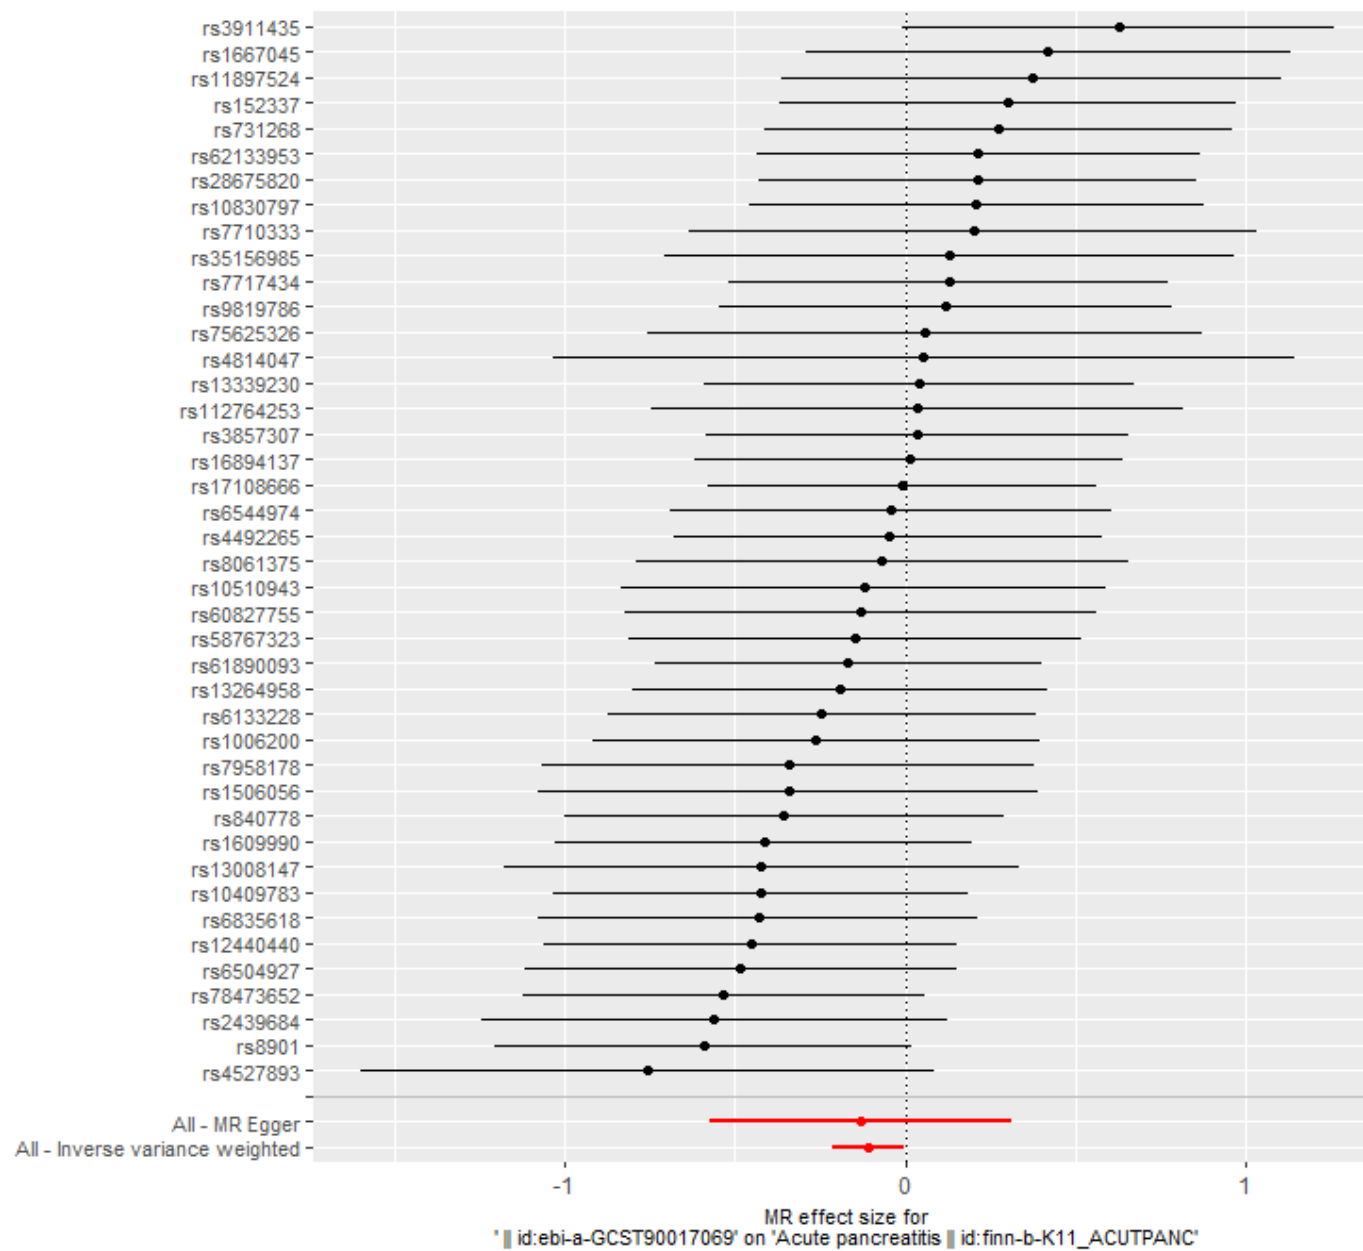

MR Test

- Inverse variance weighted
- MR Egger
- Simple mode
- Weighted median
- Weighted mode

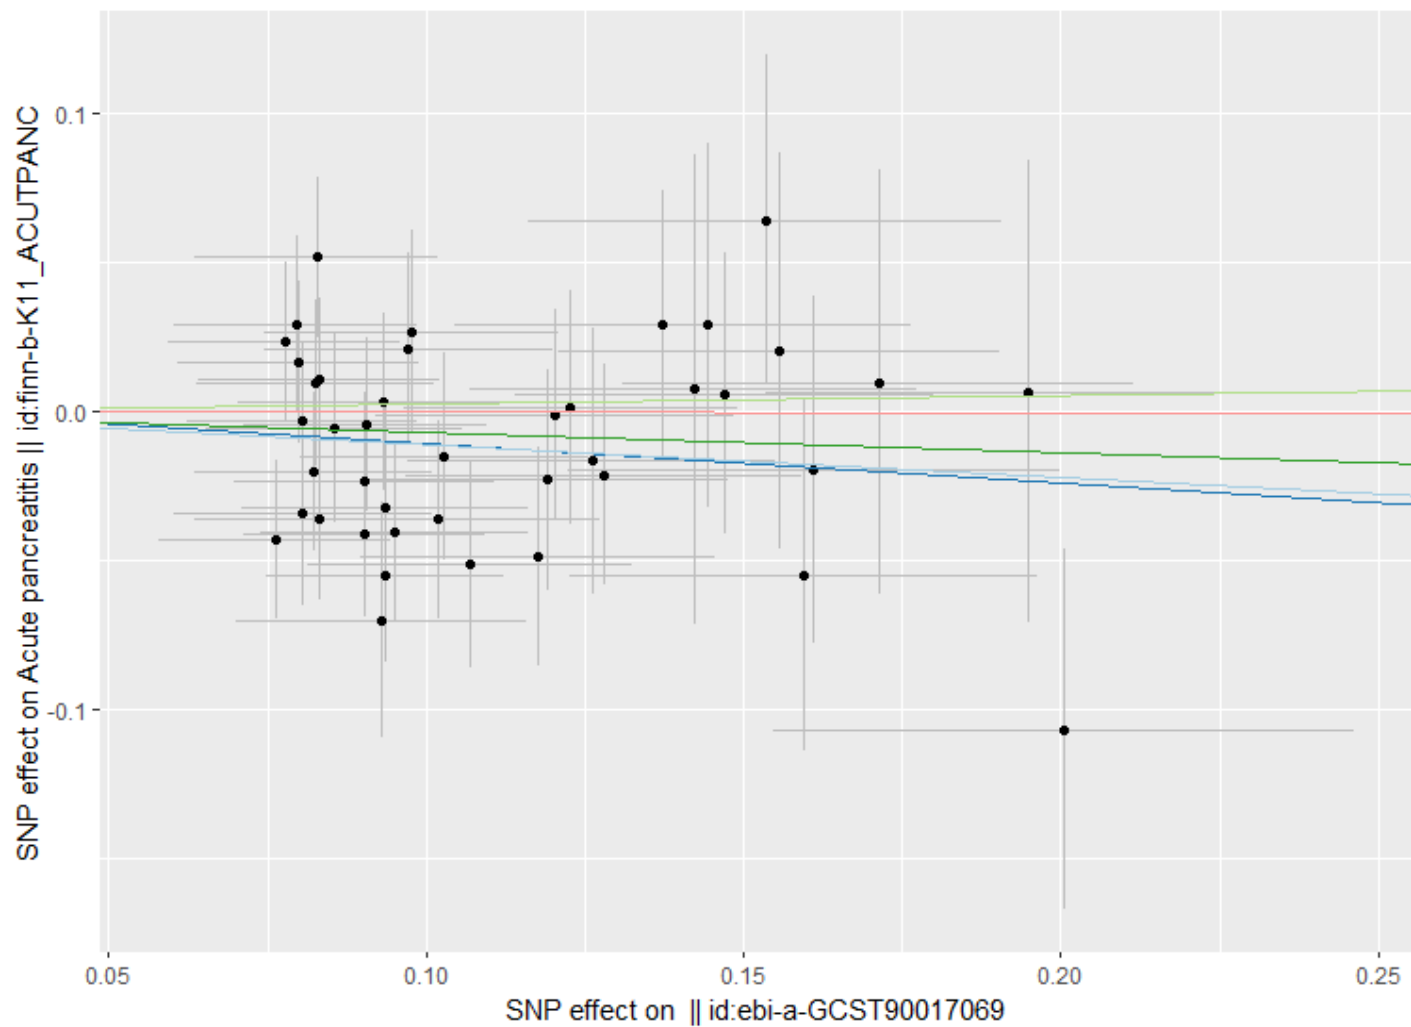



**Figure 205** Leave-one-out analysis, funnel plot, MR effect size and scatter plot for gut microbiota abundance (order Methanobacteriales id.120) on acute pancreatitis

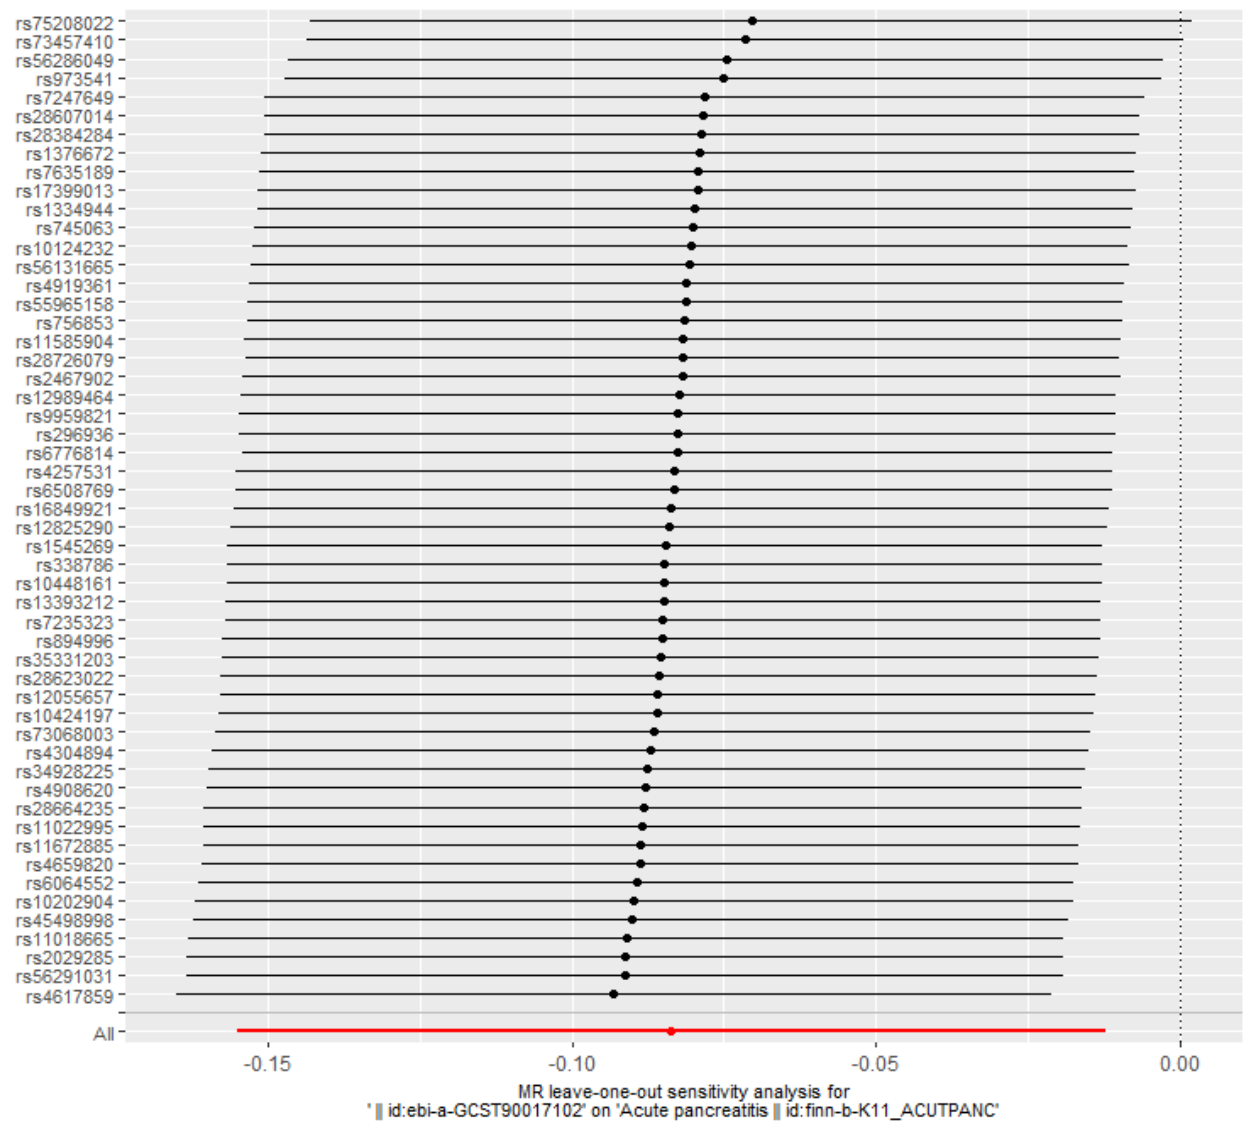

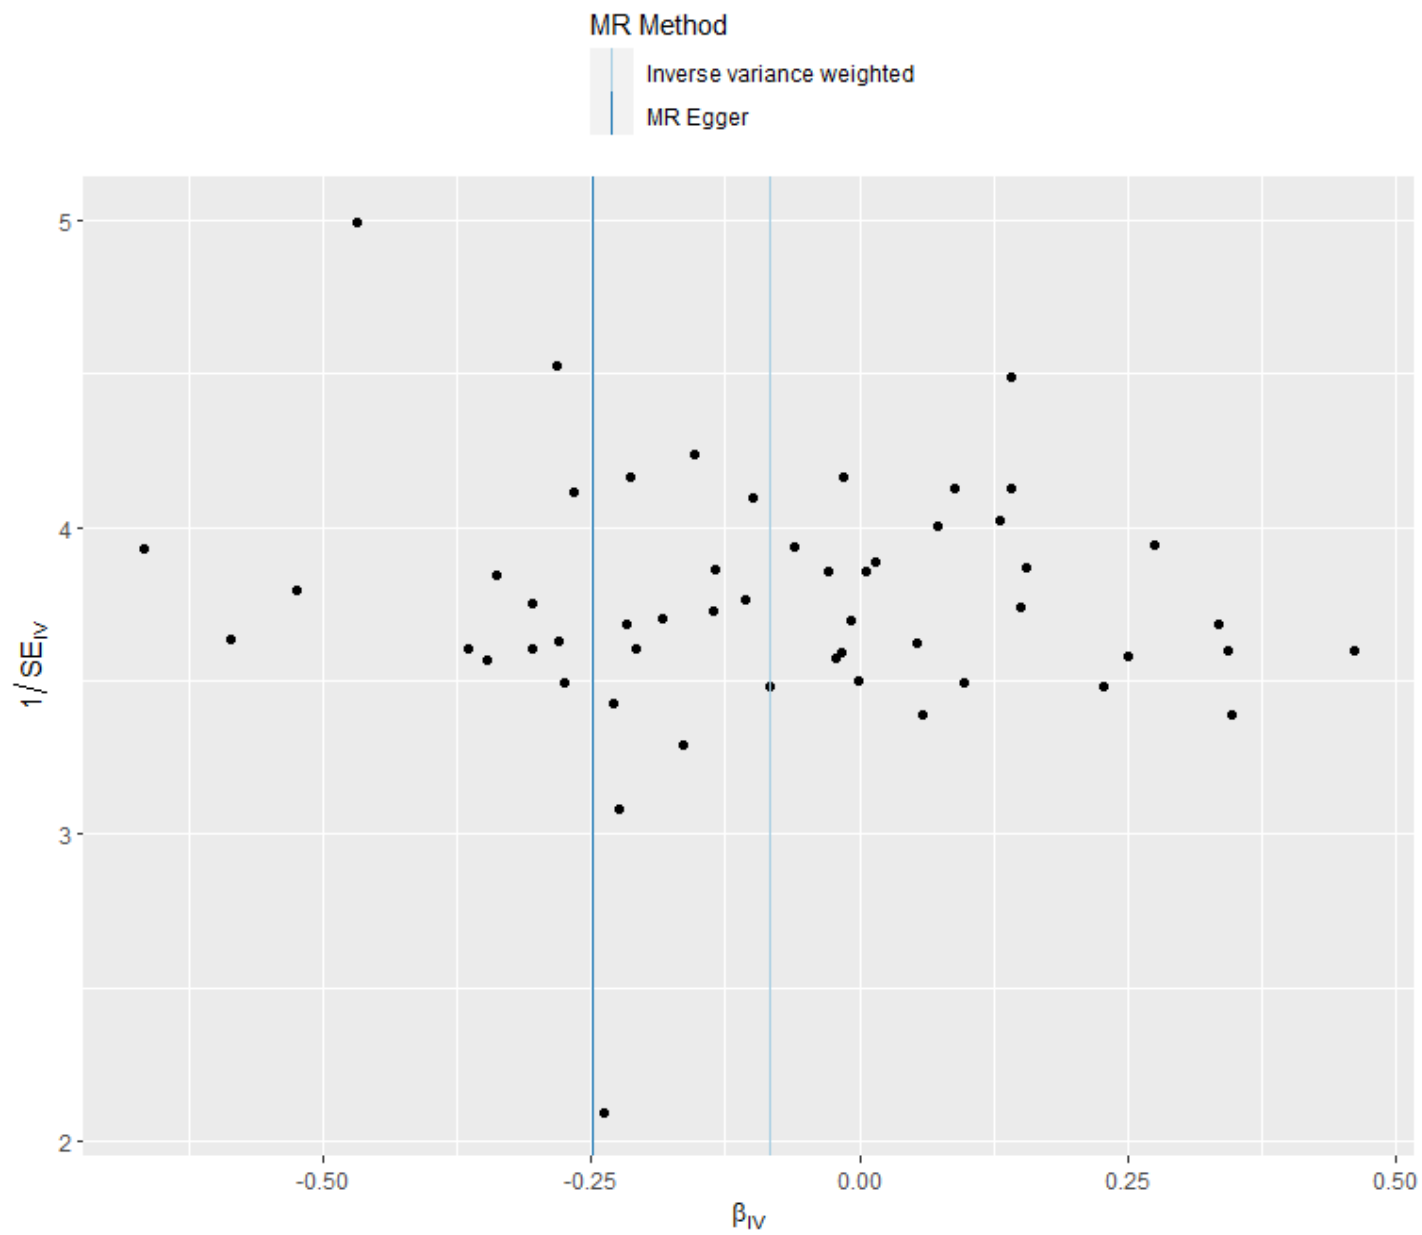

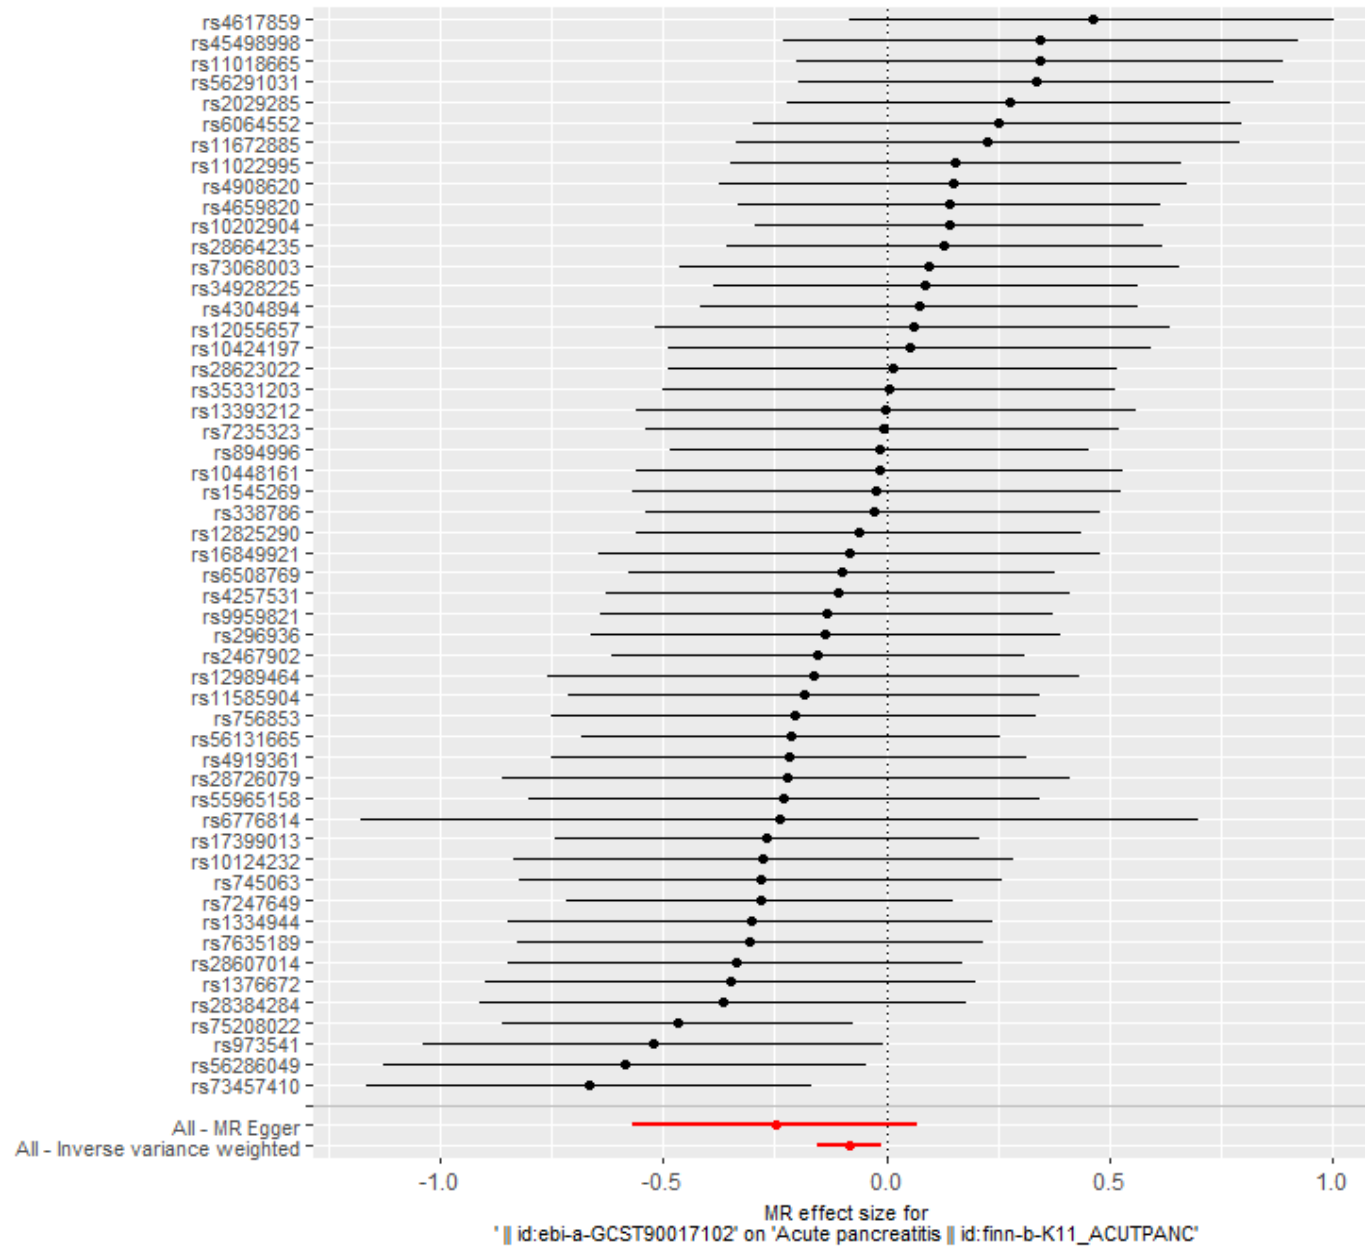

MR Test

- Inverse variance weighted
- MR Egger
- Simple mode
- Weighted median
- Weighted mode

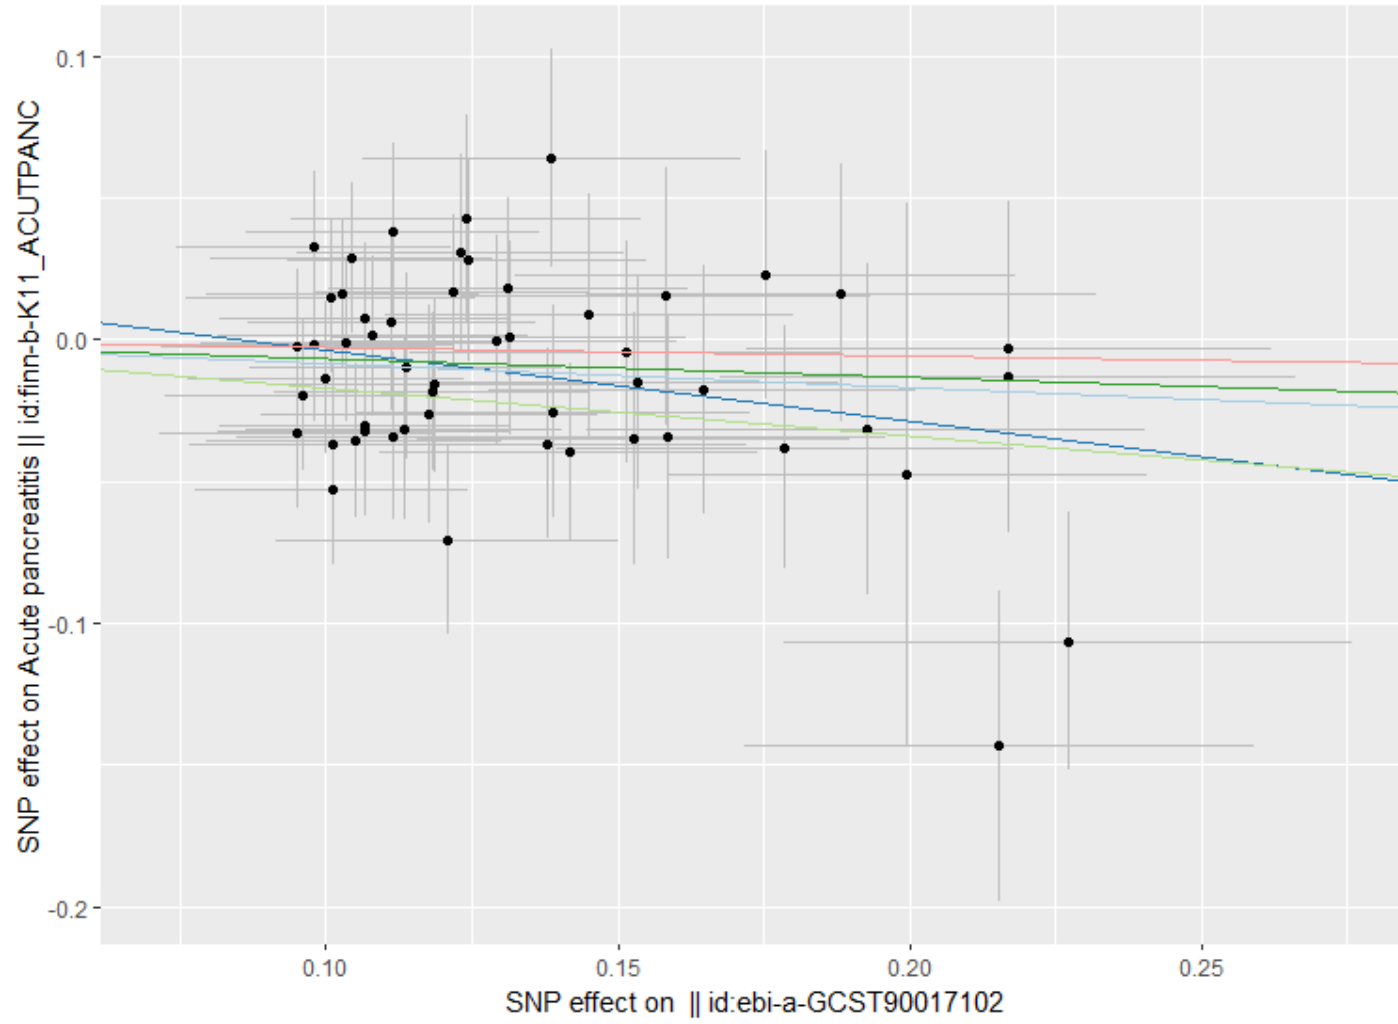

**Figure 206** Leave-one-out analysis, funnel plot, MR effect size and scatter plot for gut microbiota abundance (phylum Verrucomicrobia id.3982) on acute pancreatitis

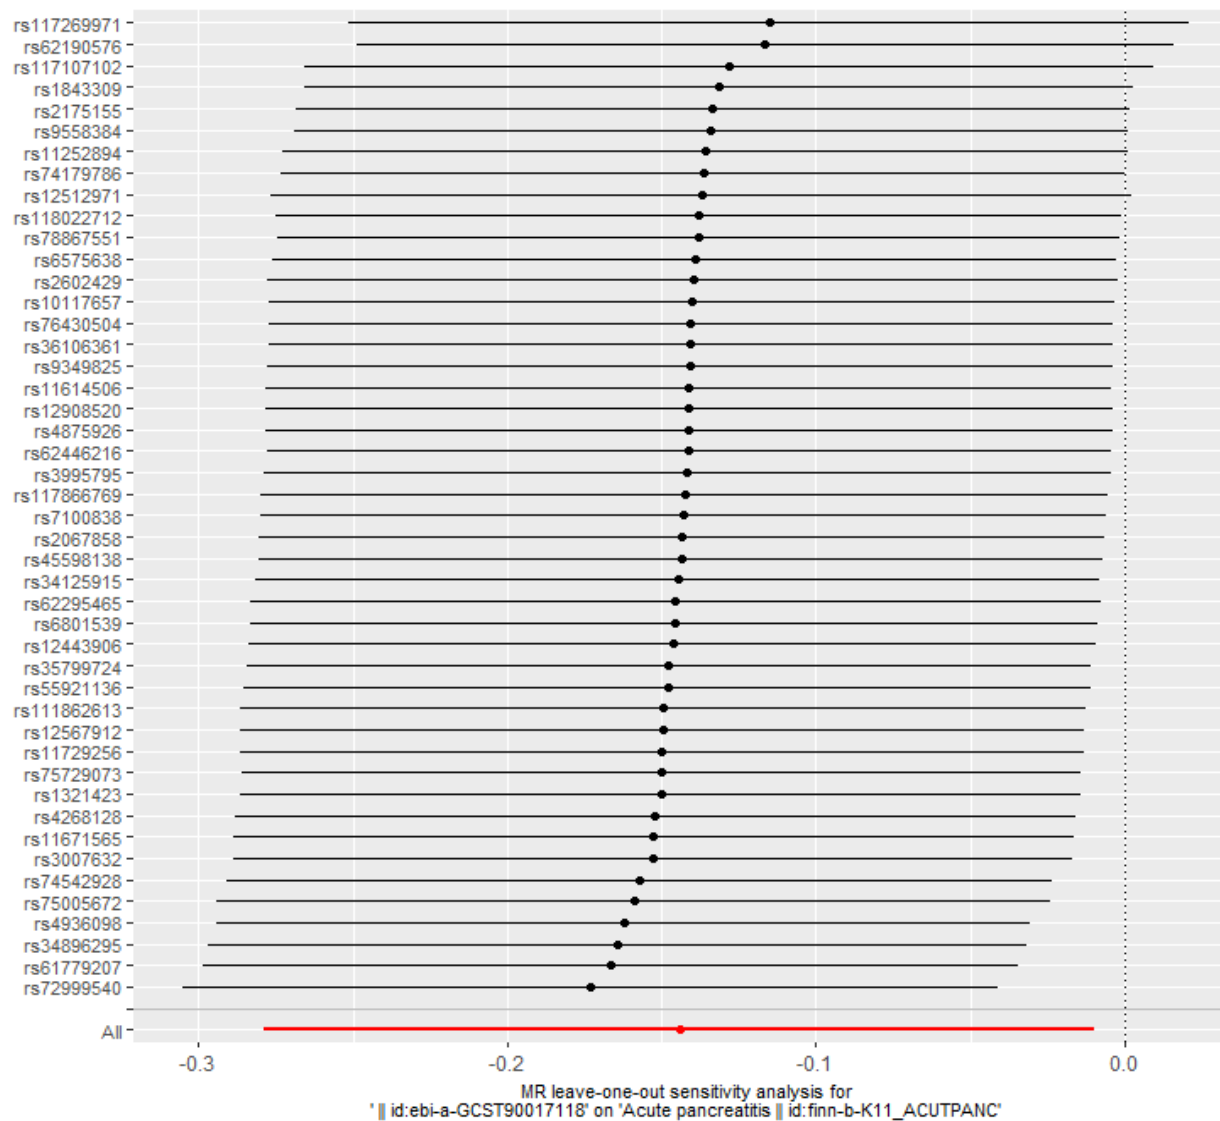

MR Method

- Inverse variance weighted
- MR Egger

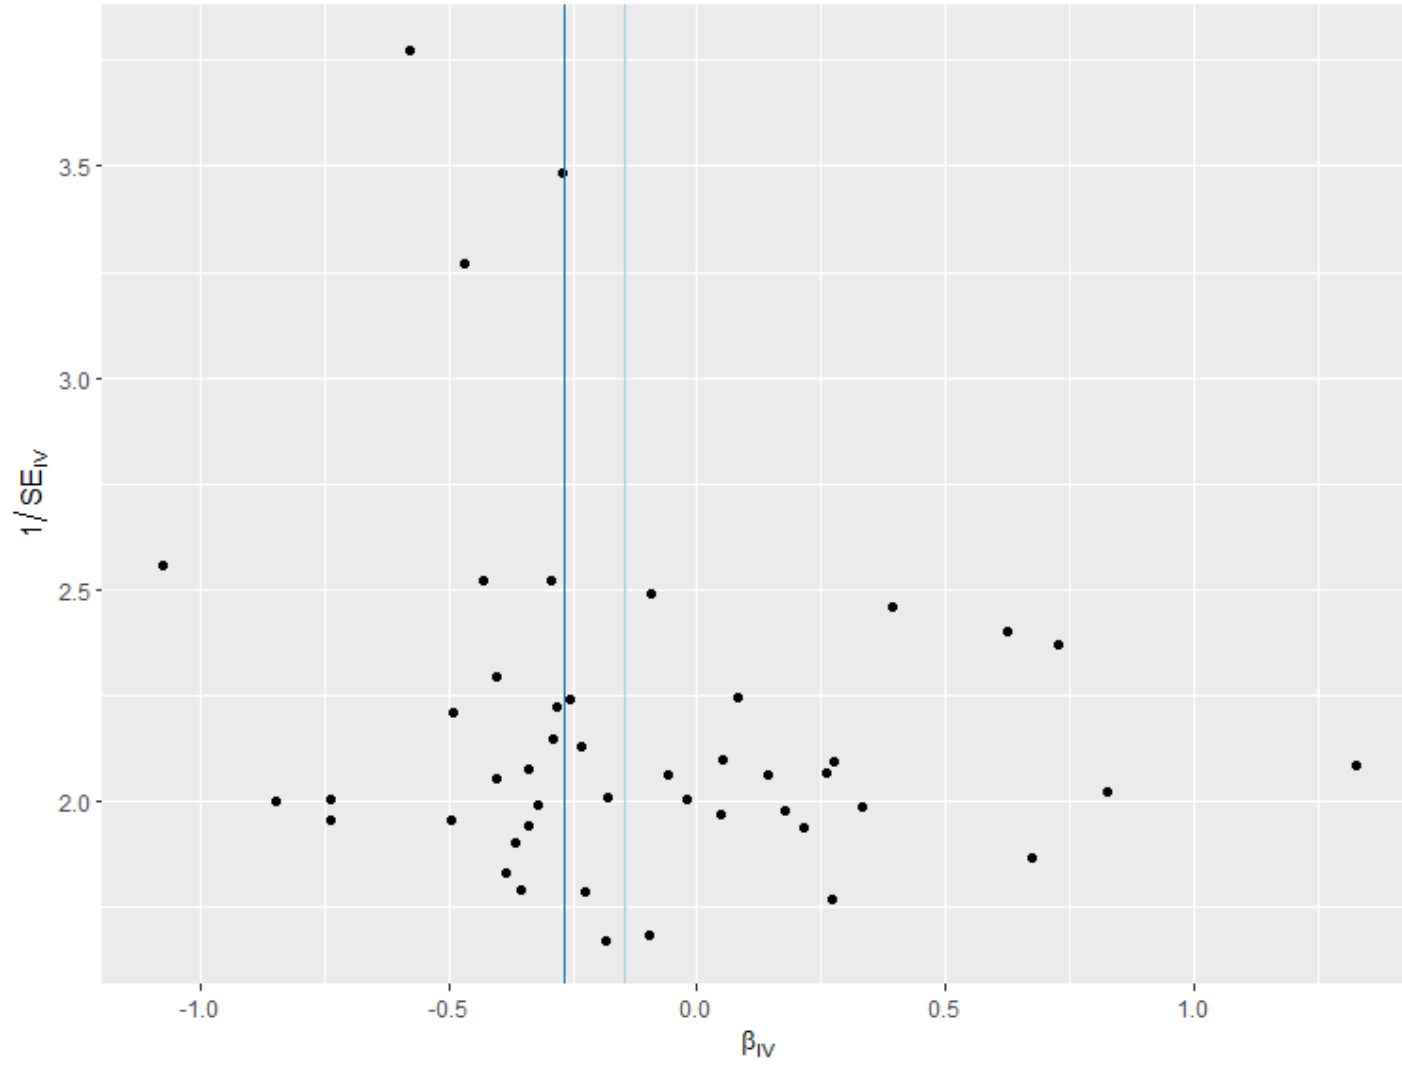

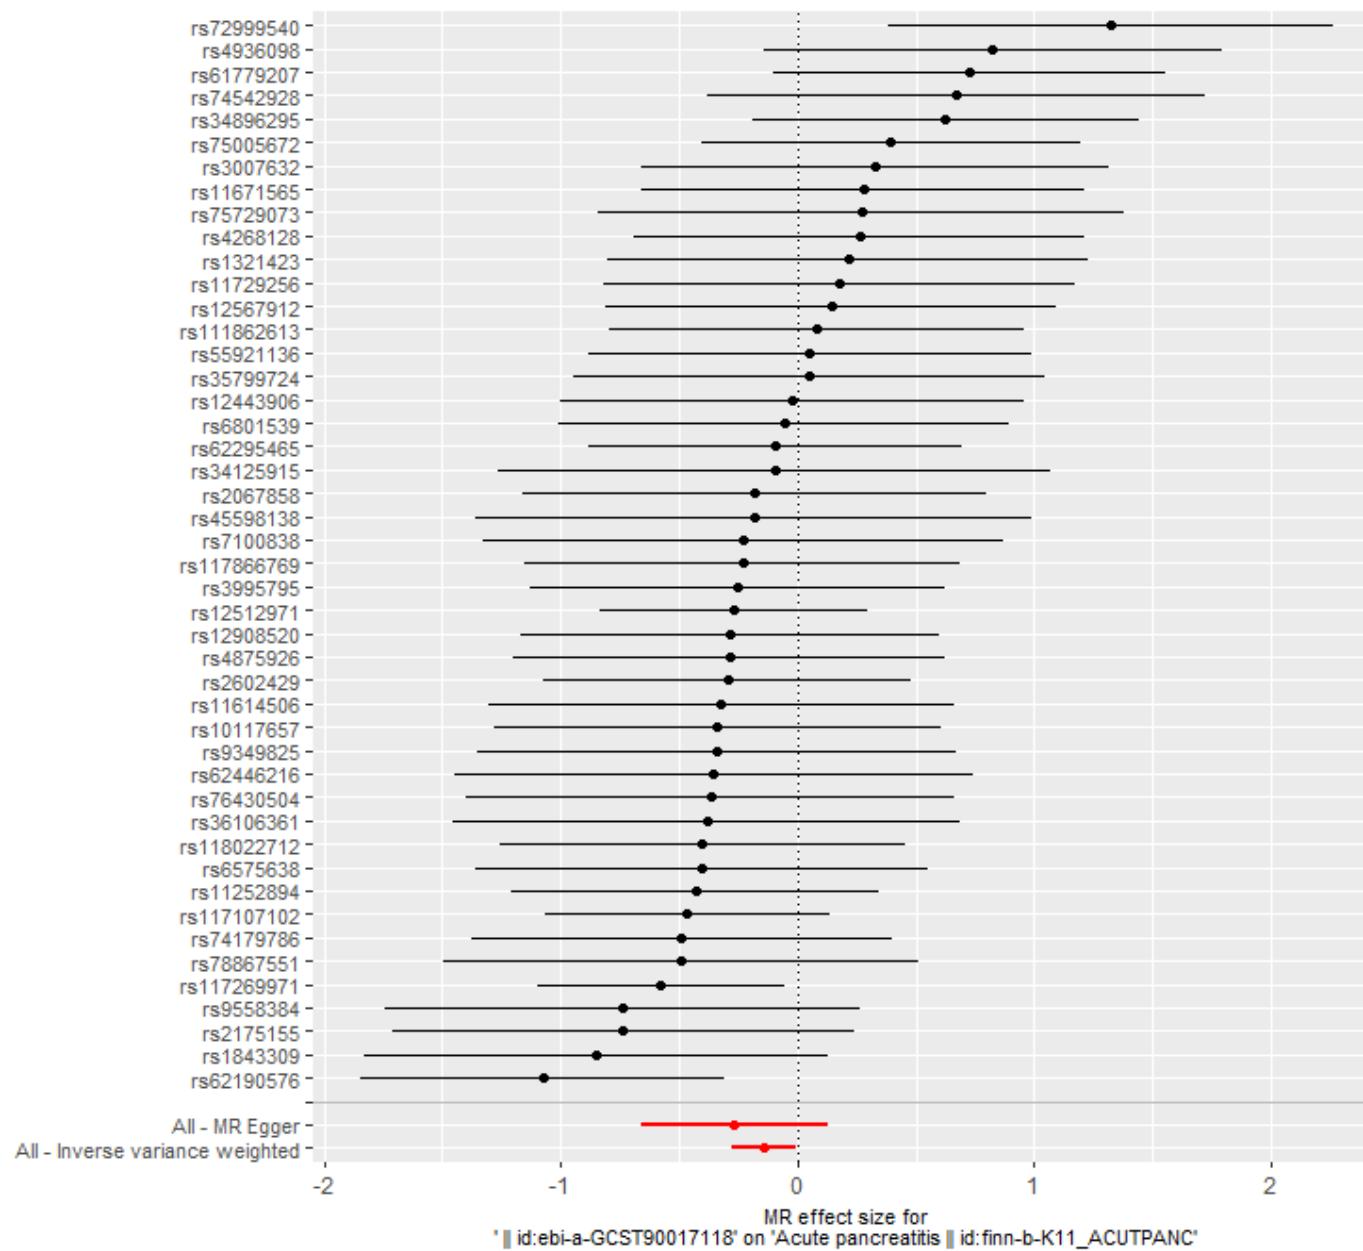

MR Test

- Inverse variance weighted
- MR Egger
- Simple mode
- Weighted median
- Weighted mode

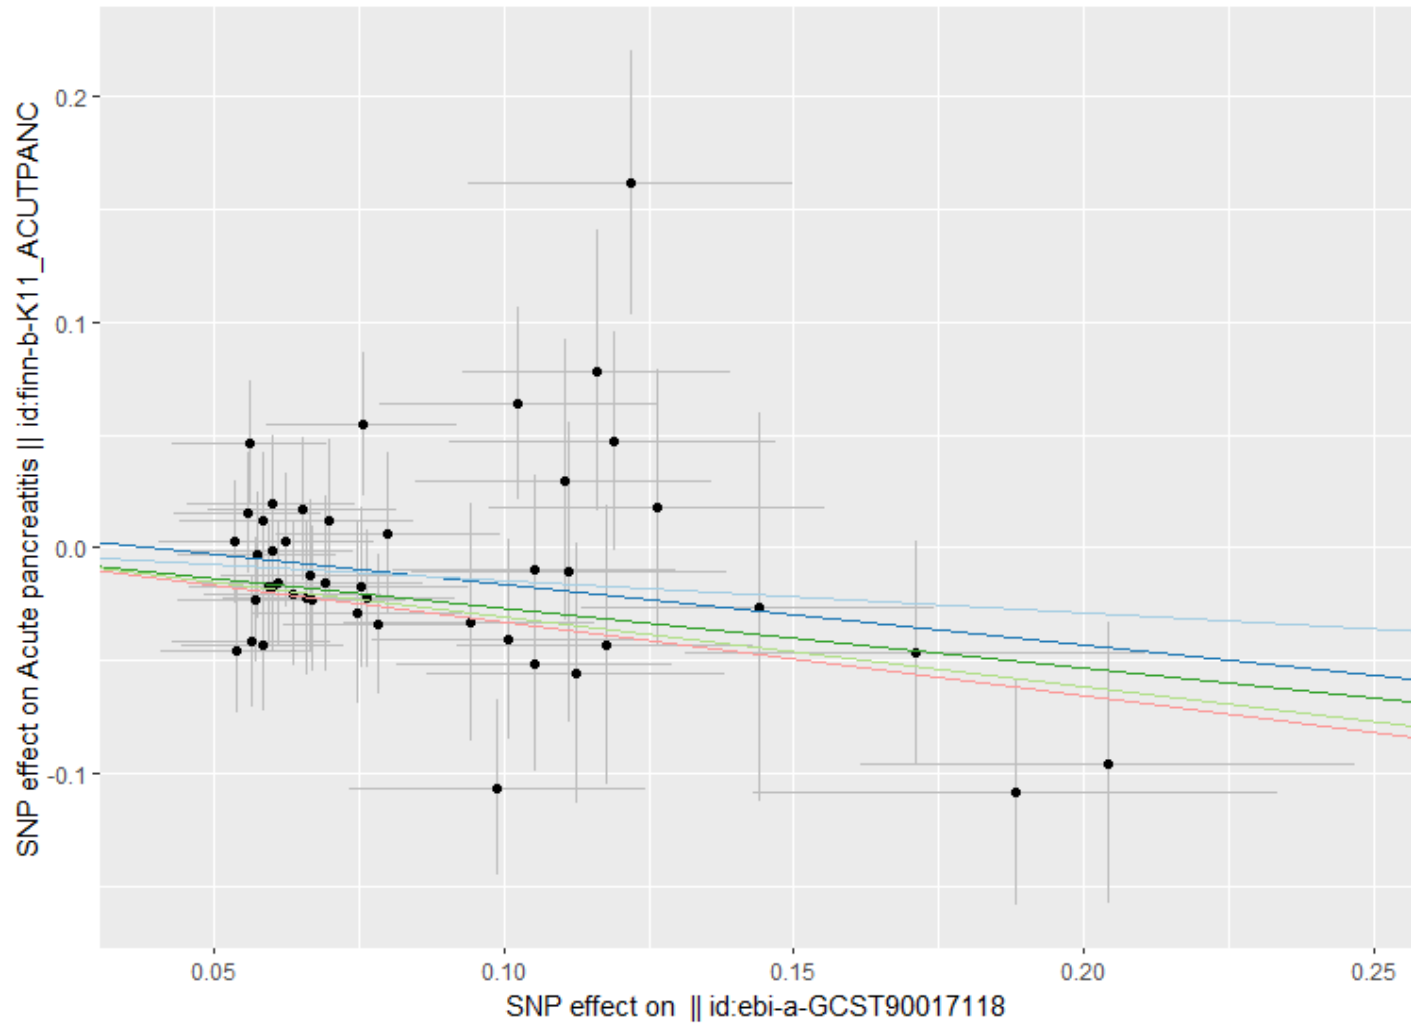



**Figure 207** Leave-one-out analysis, funnel plot, MR effect size and scatter plot for gut microbiota abundance (family Victivallaceae id.2255) on chronic pancreatitis

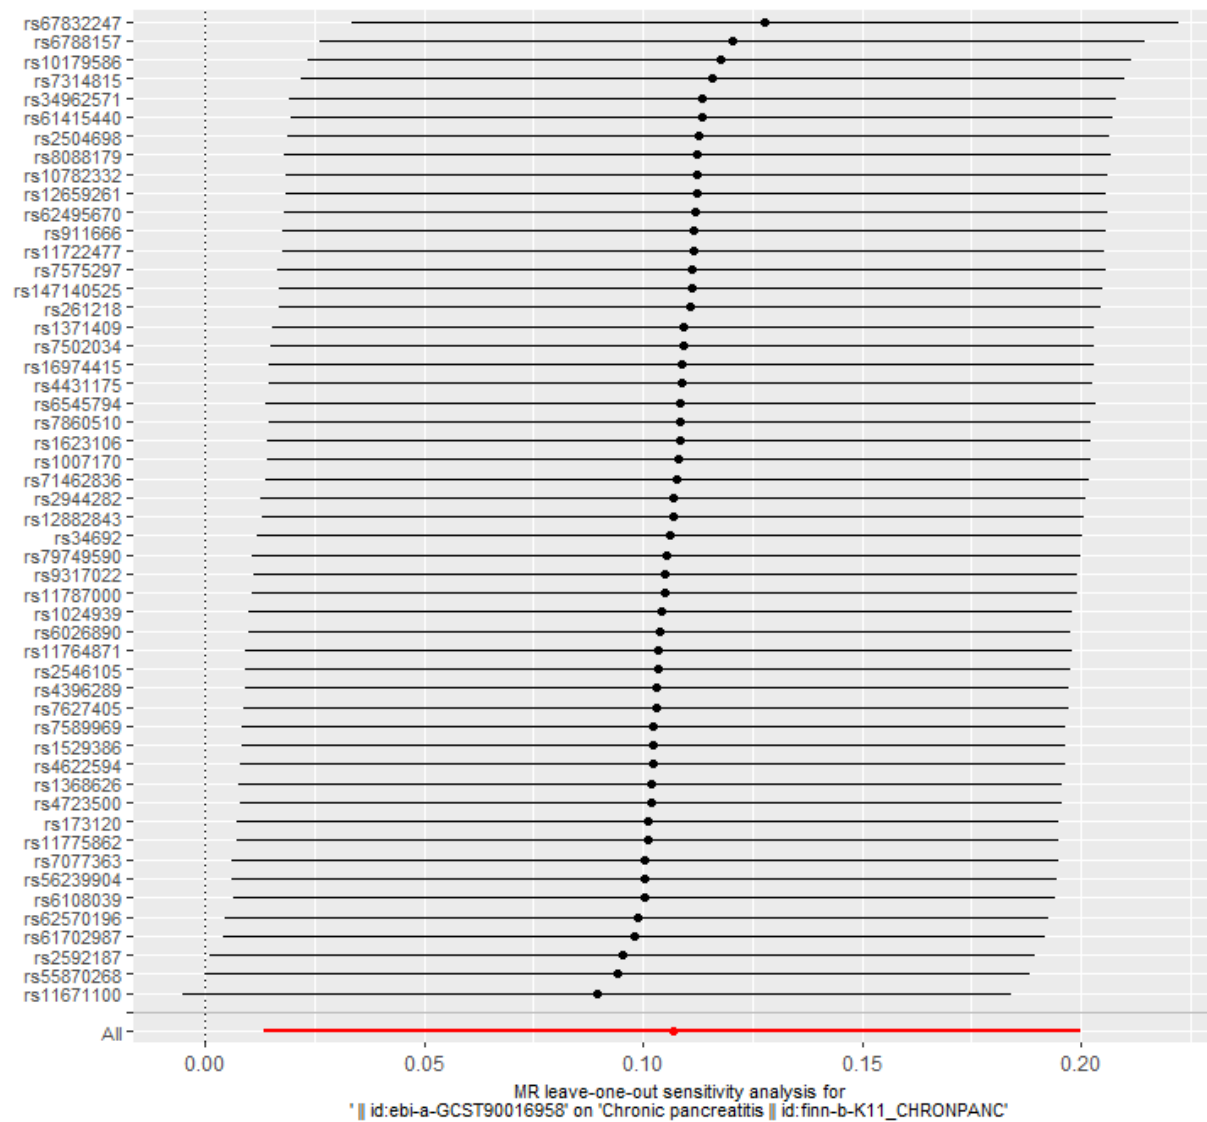

MR Method

- Inverse variance weighted
- MR Egger

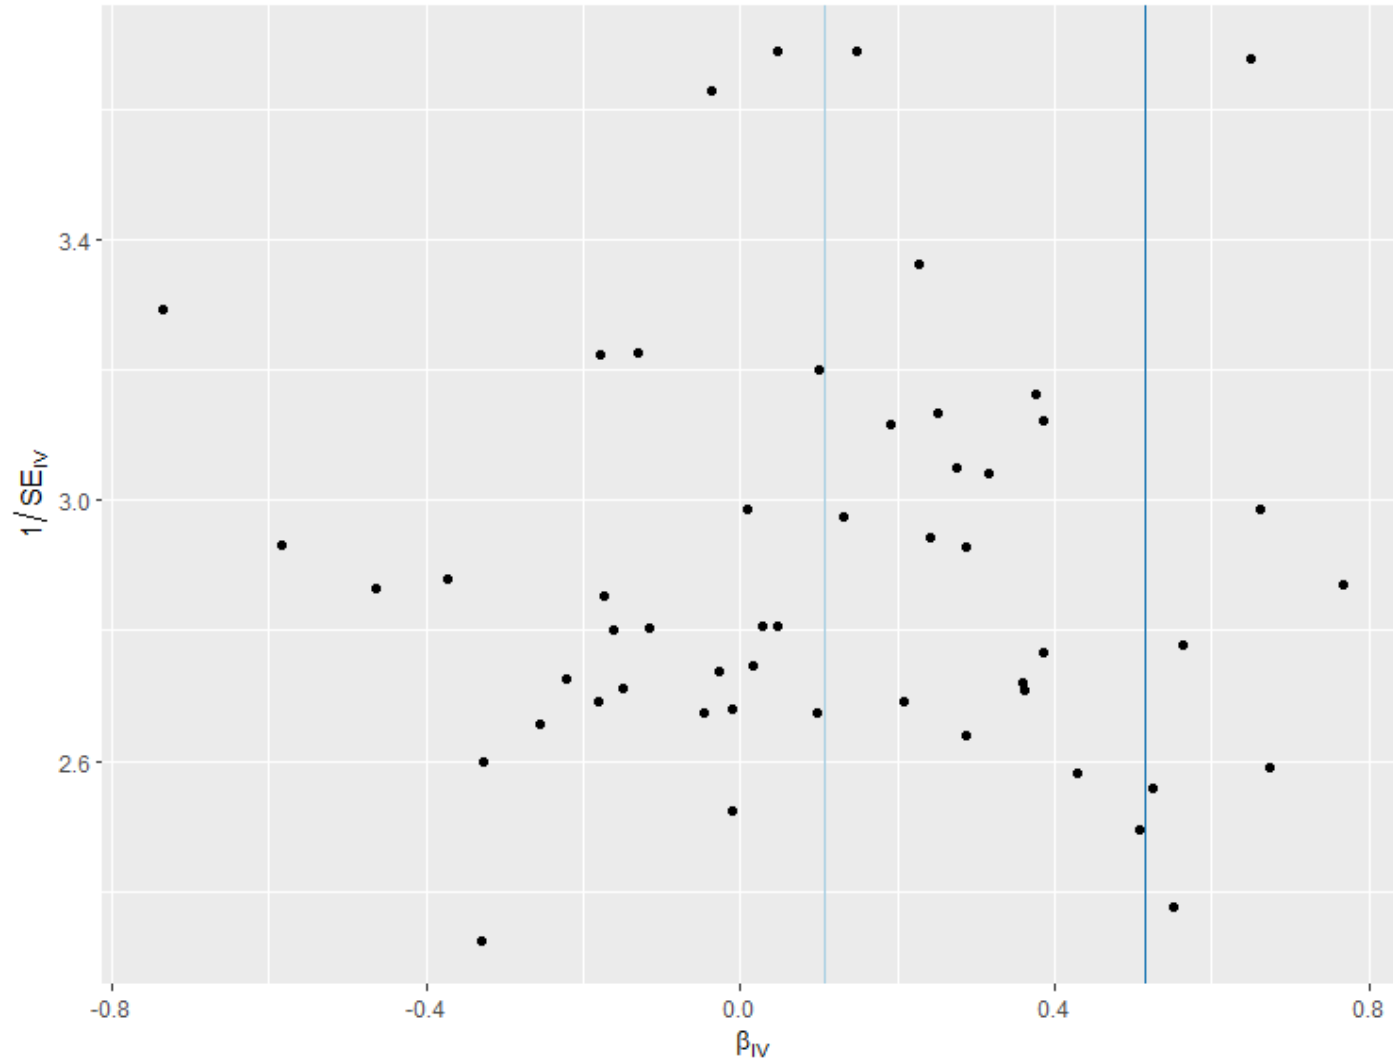

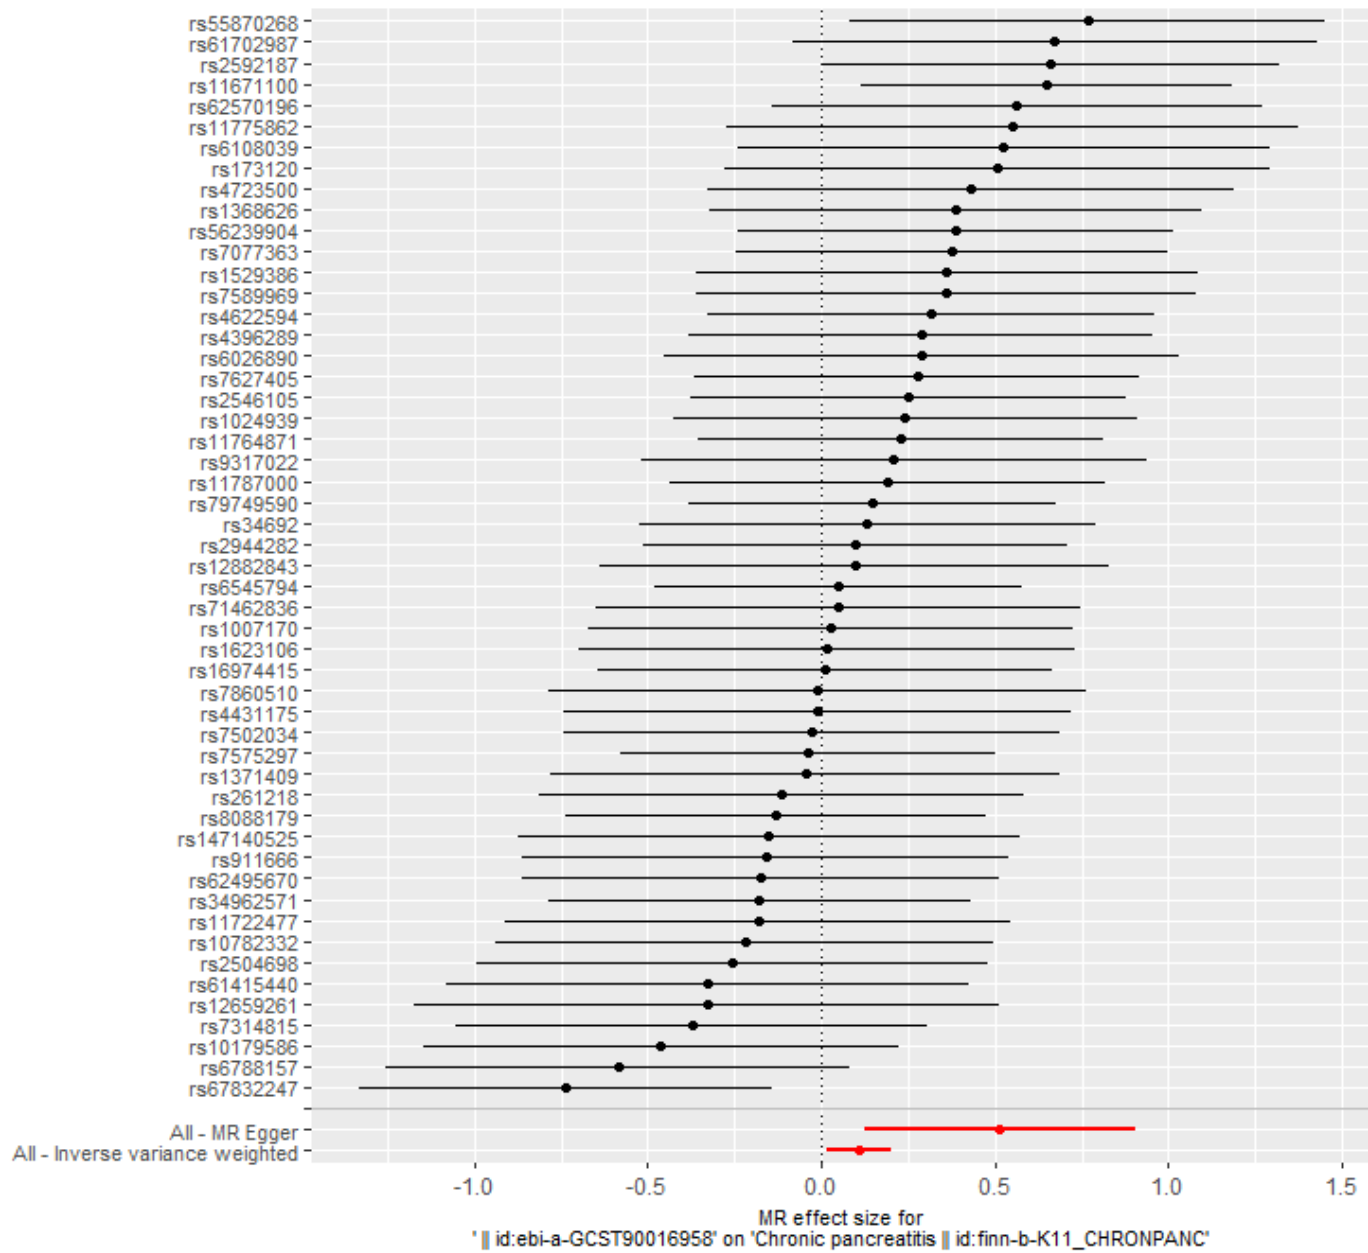

MR Test

- Inverse variance weighted
- MR Egger
- Simple mode
- Weighted median
- Weighted mode

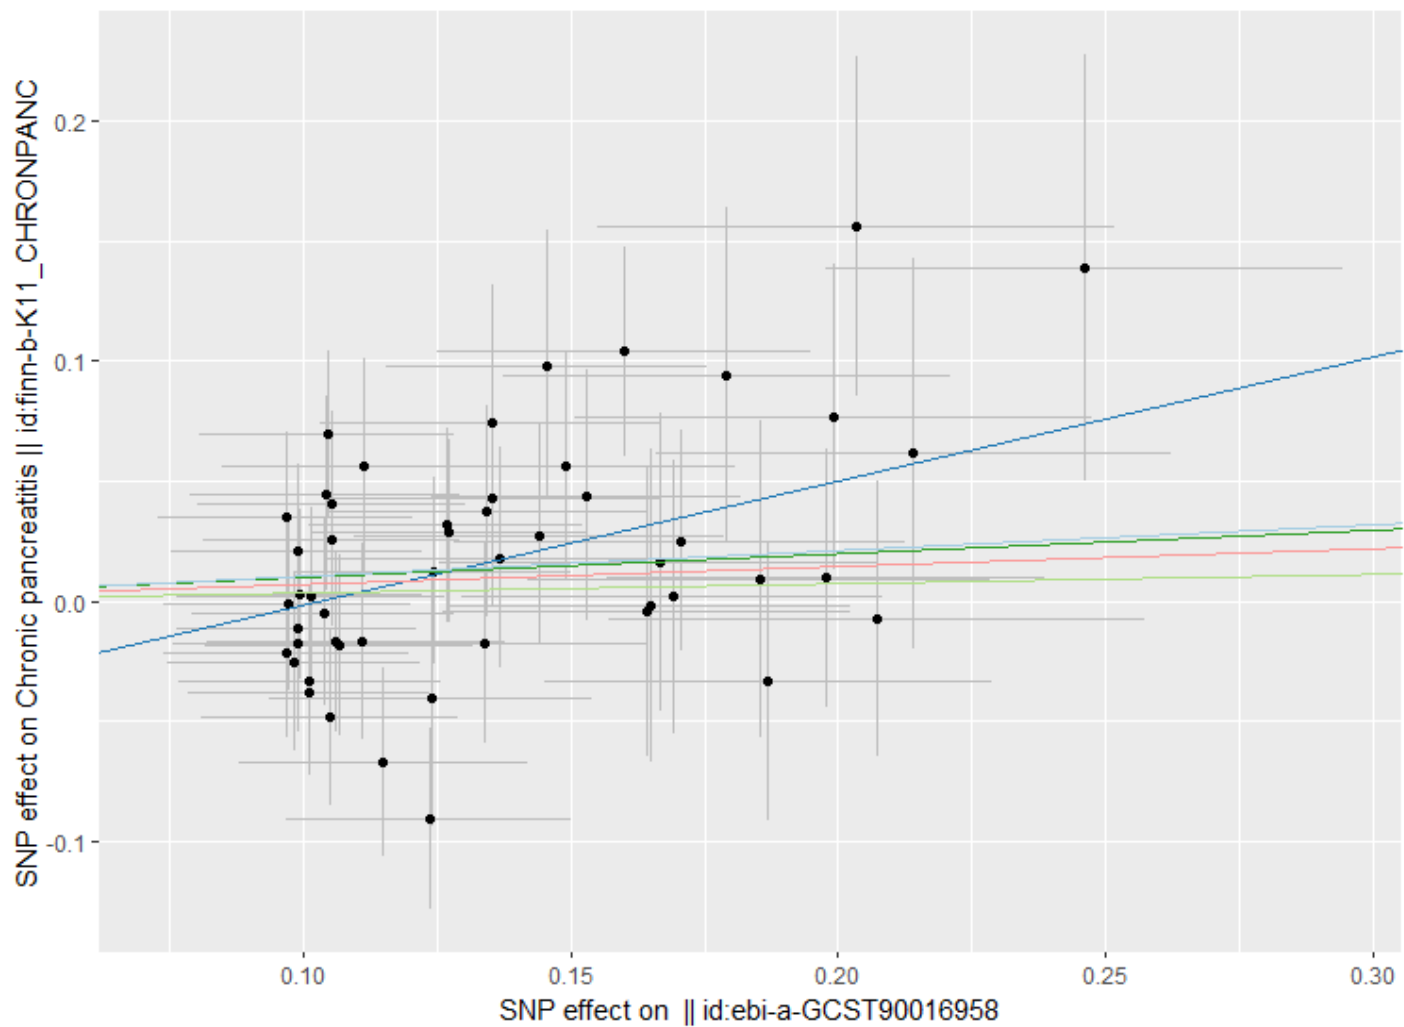

**Figure 208** Leave-one-out analysis, funnel plot, MR effect size and scatter plot for gut microbiota abundance (genus Marvinbryantia id.2005) on chronic pancreatitis

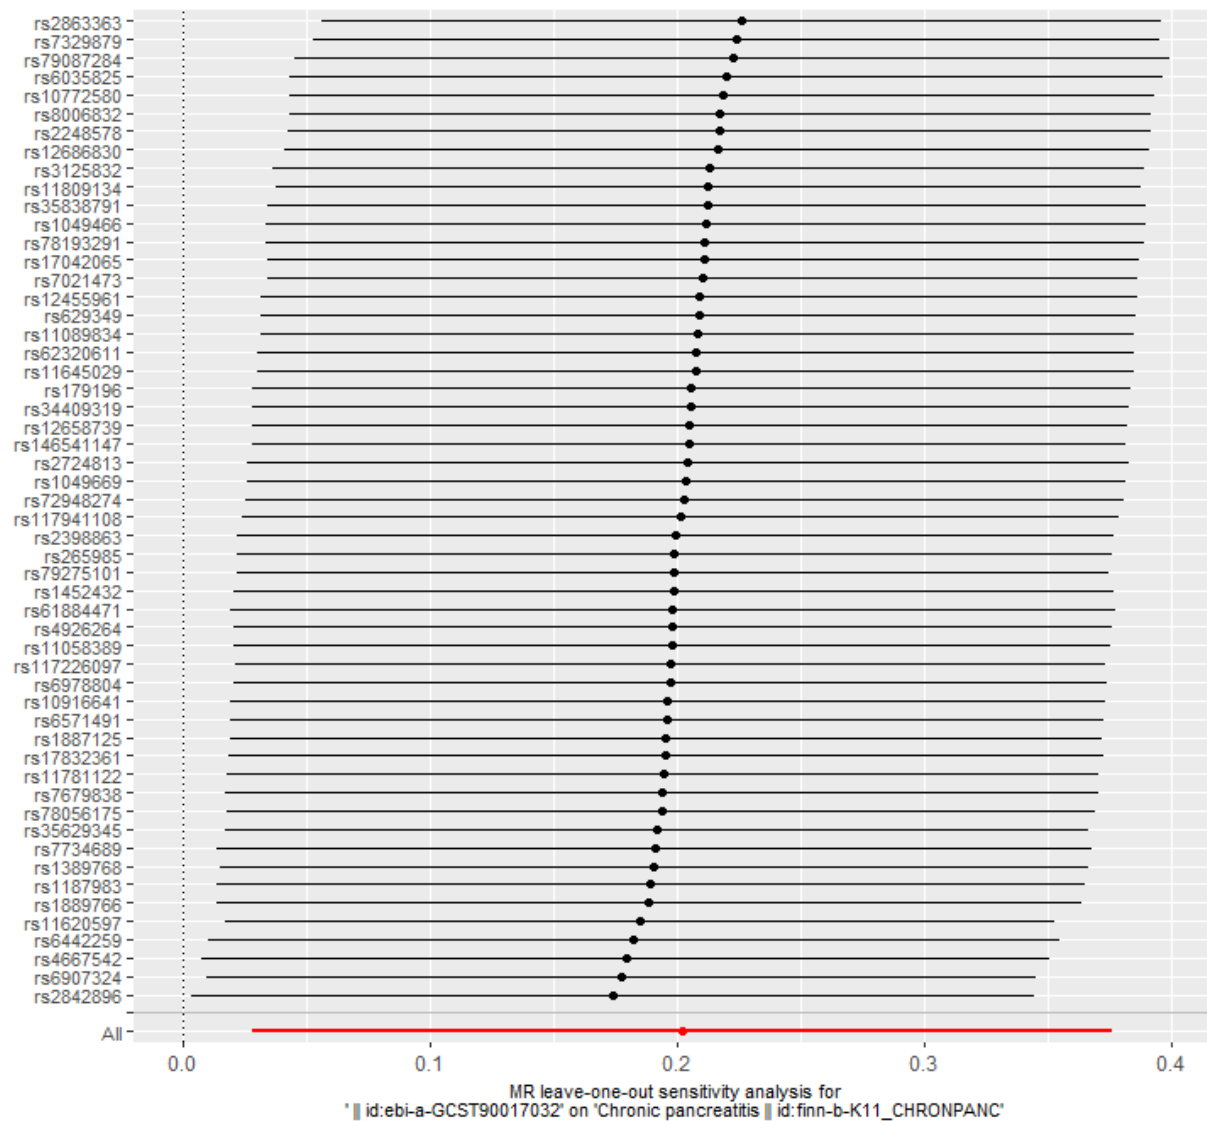



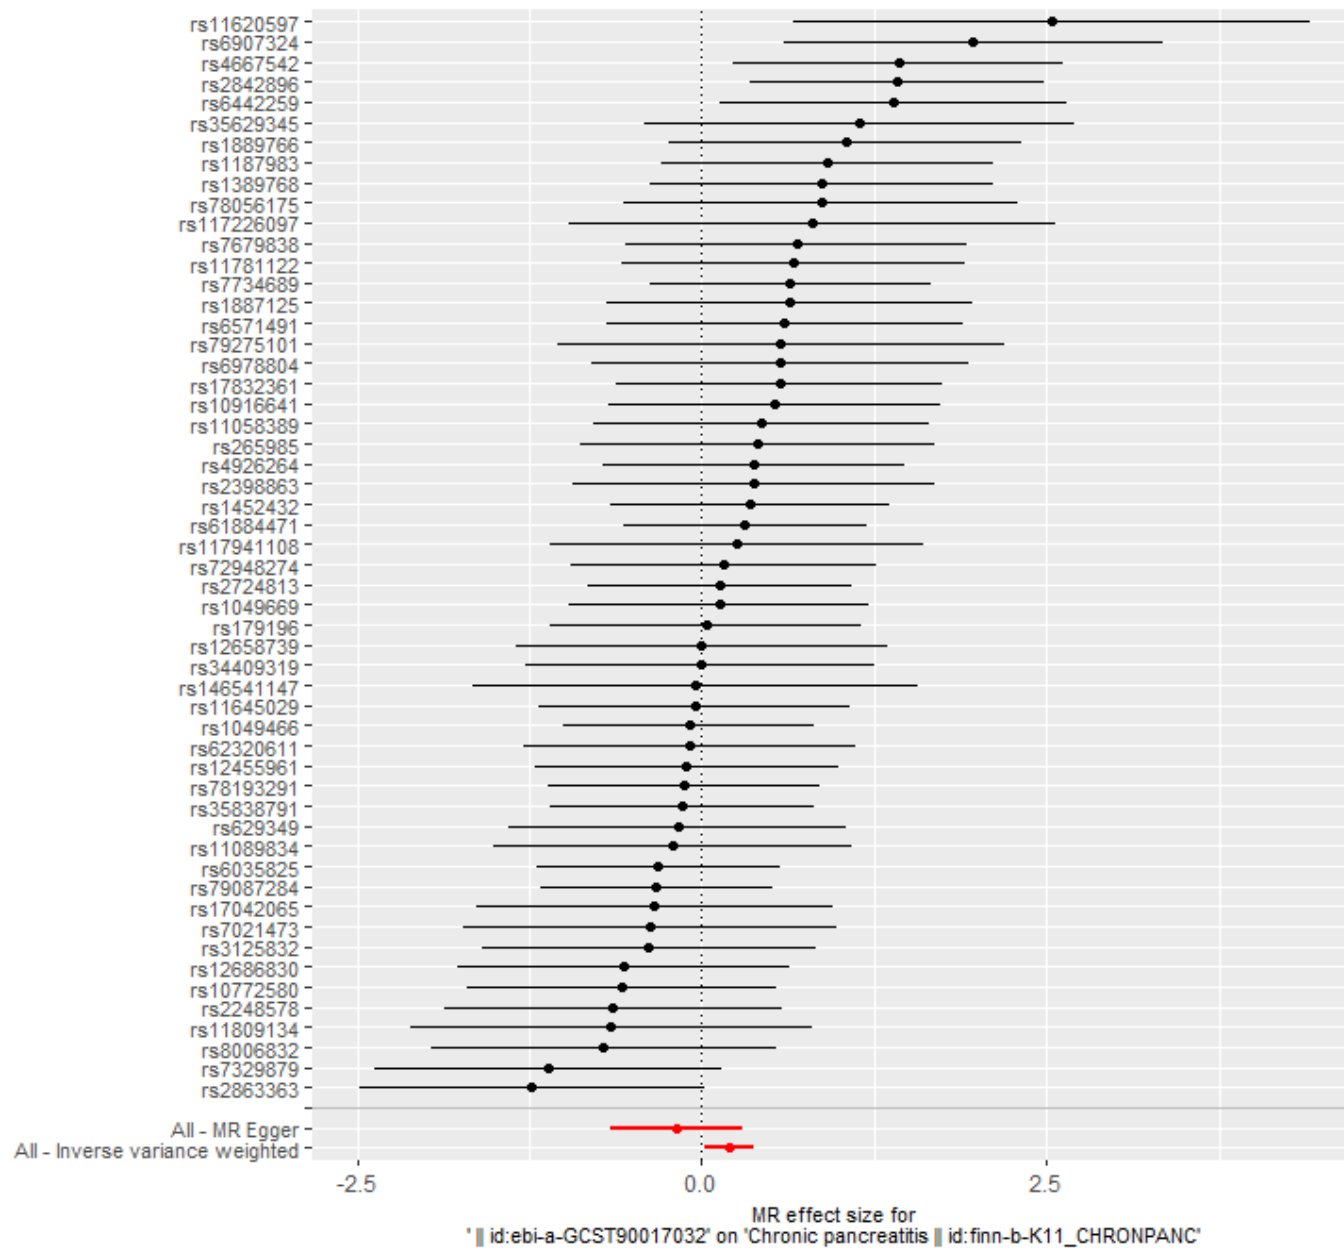

MR Test

- Inverse variance weighted
- MR Egger
- Simple mode
- Weighted median
- Weighted mode

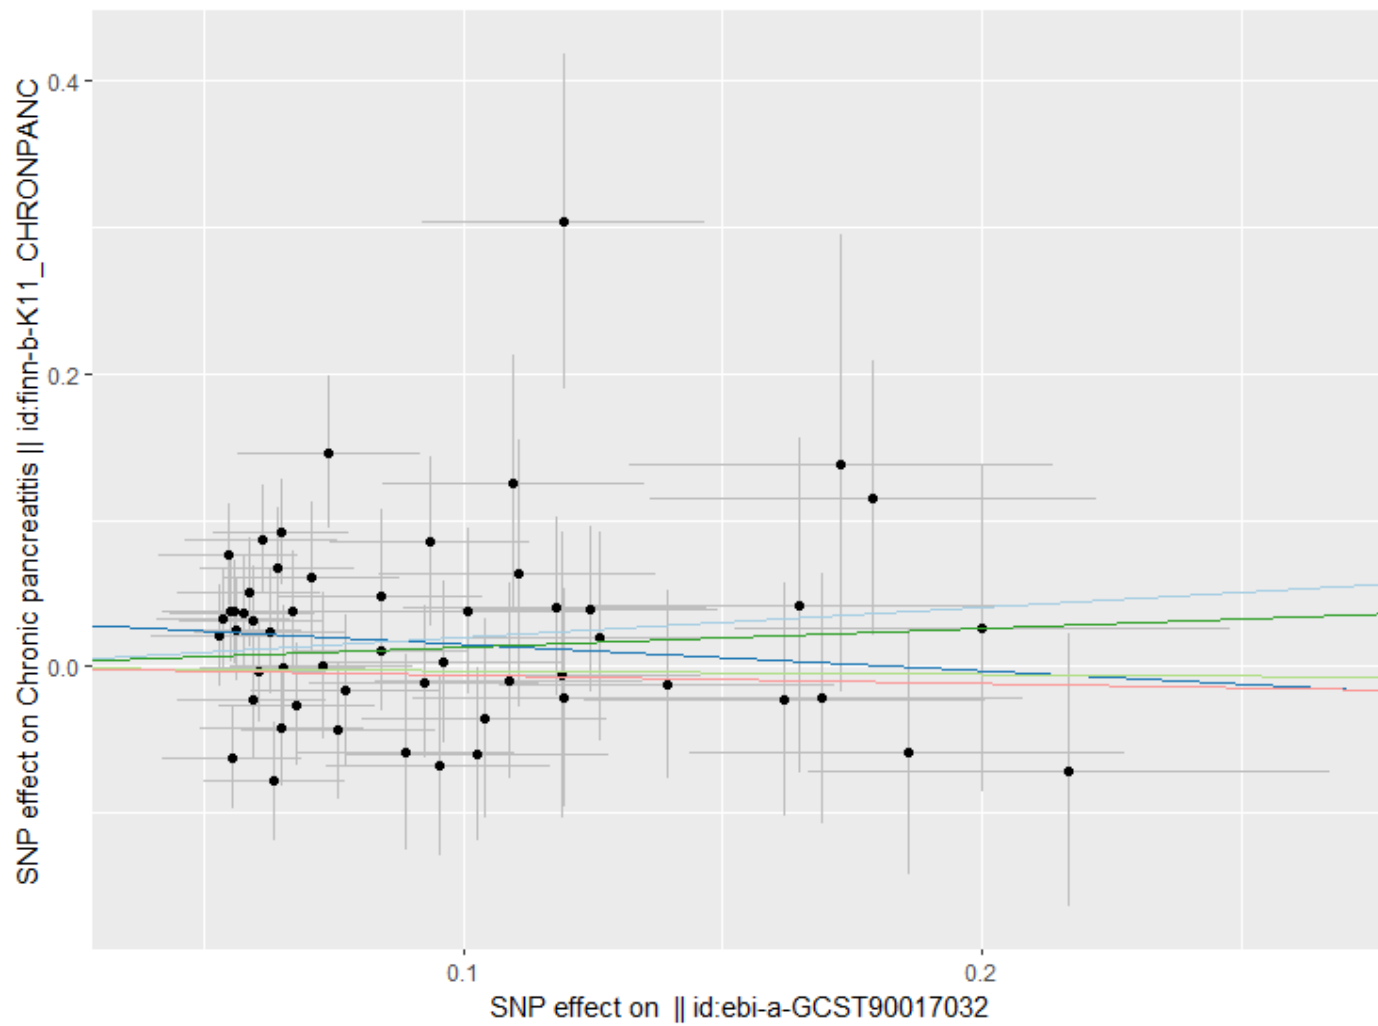



**Figure 209** Leave-one-out analysis, funnel plot, MR effect size and scatter plot for gut microbiota abundance (genus Romboutsia id.11347) on chronic pancreatitis

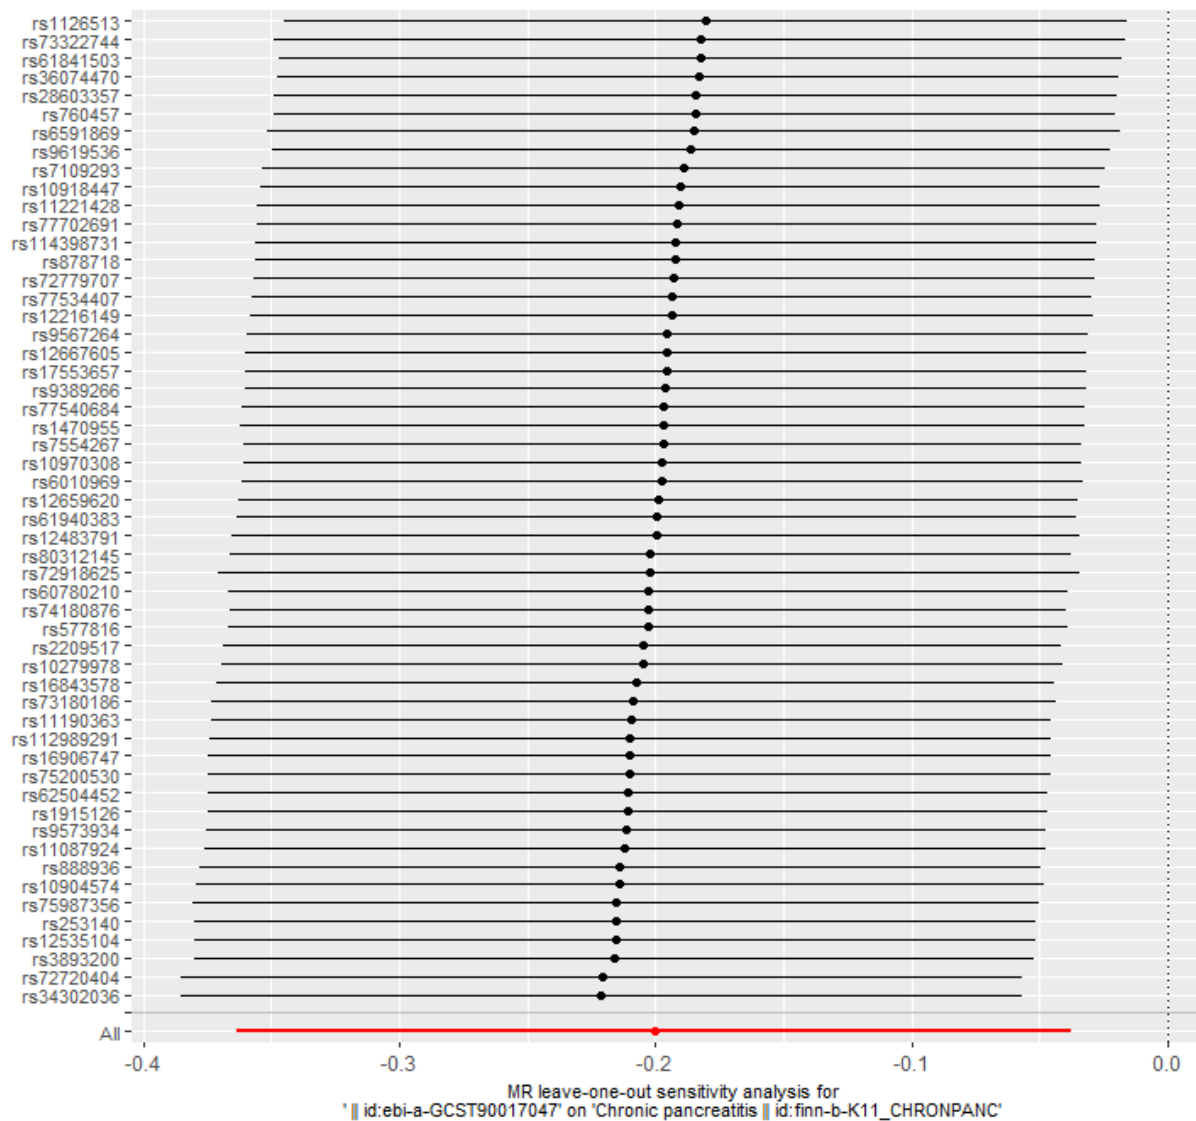

MR Method

- Inverse variance weighted
- MR Egger

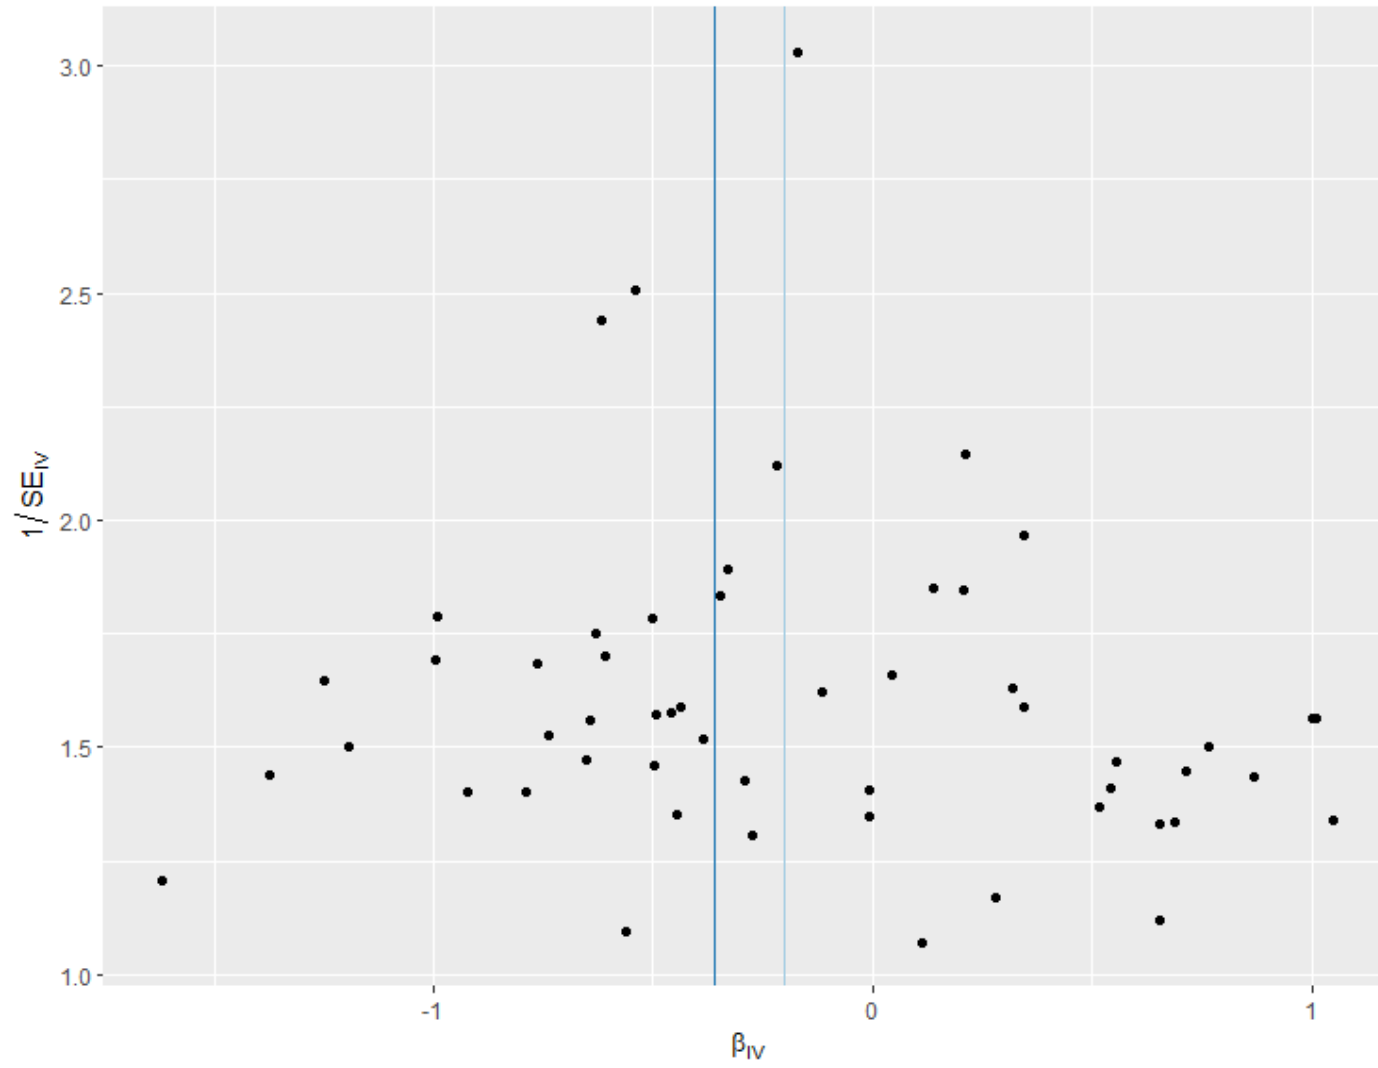

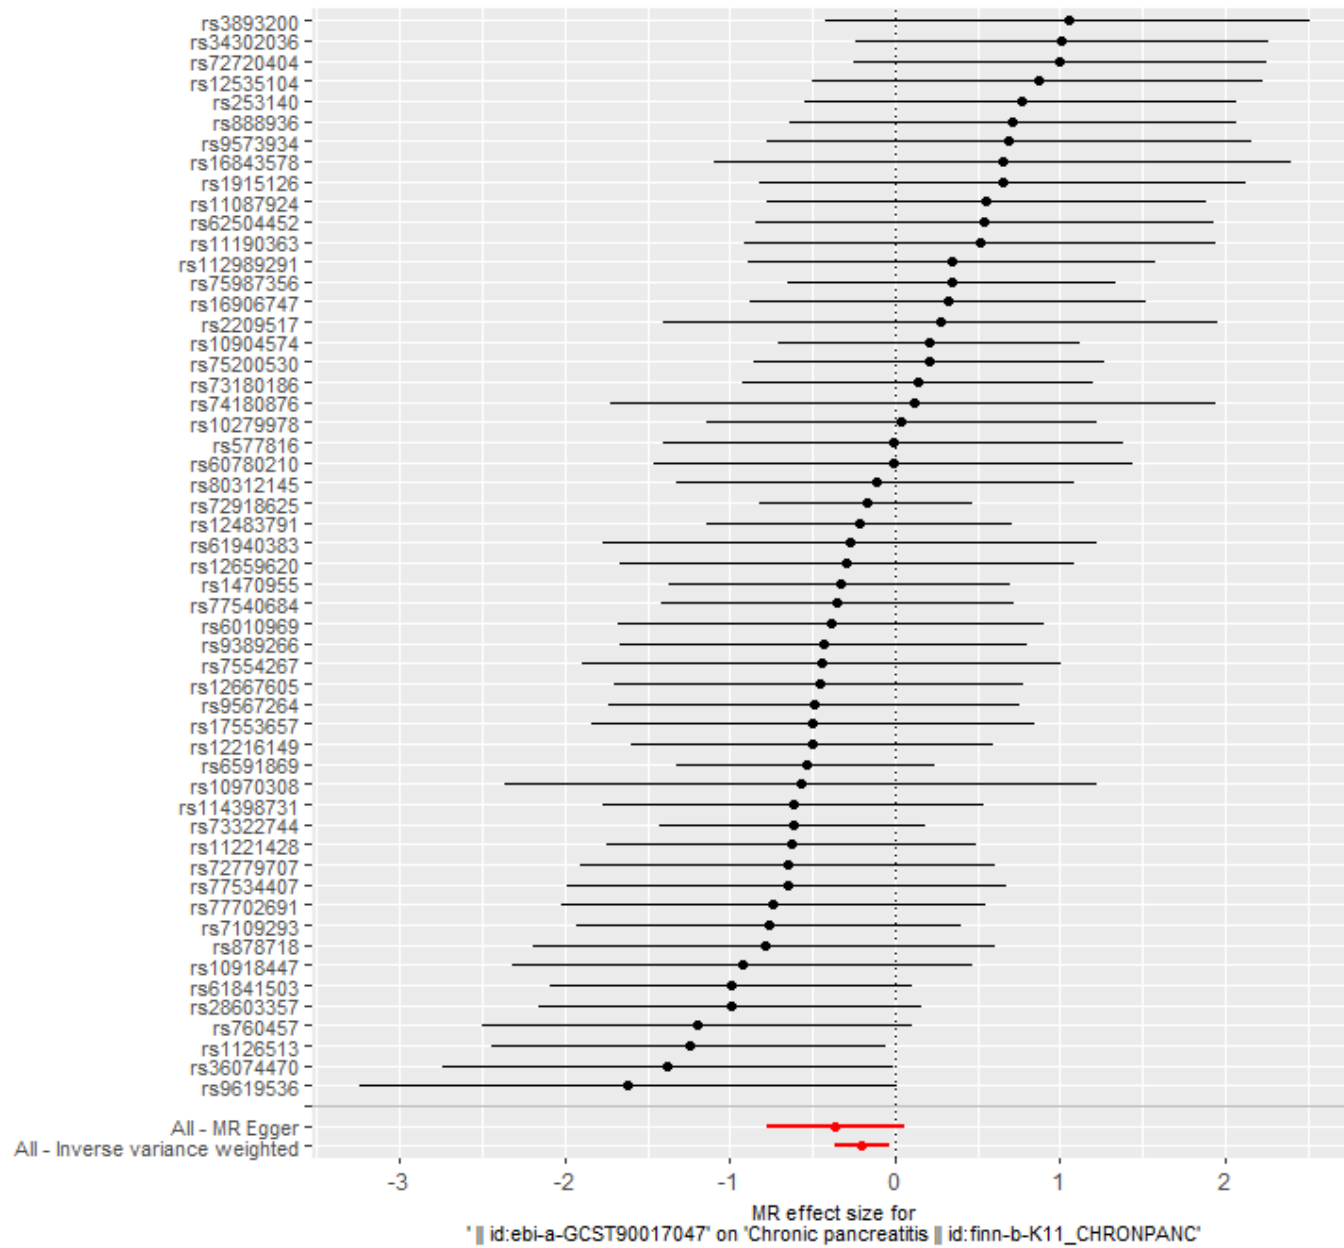

MR Test

- Inverse variance weighted
- MR Egger
- Simple mode
- Weighted median
- Weighted mode

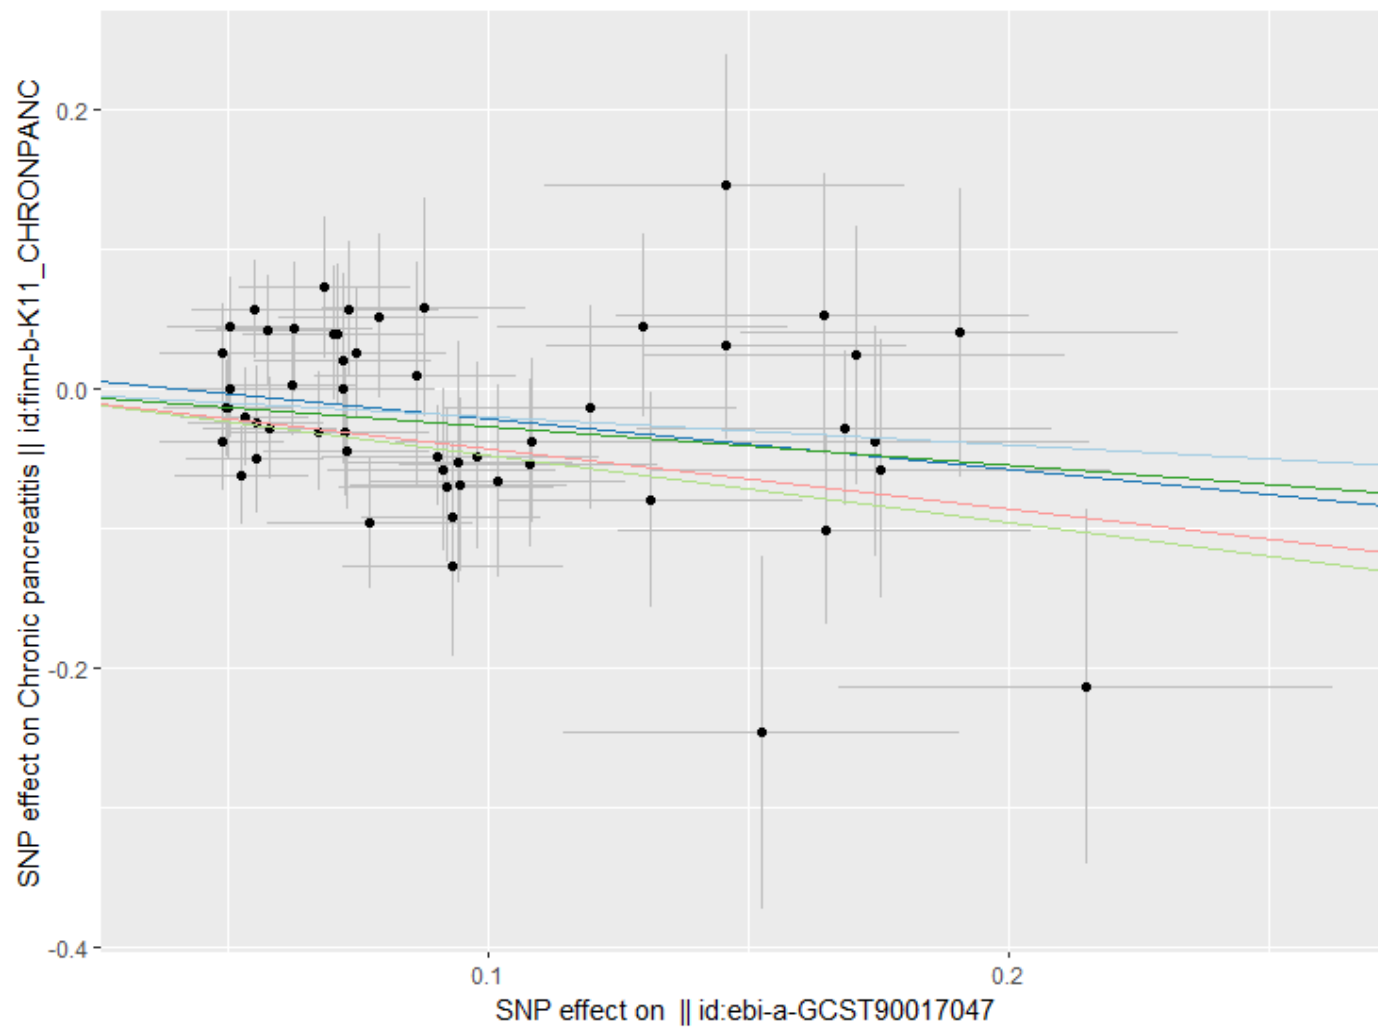

**Figure 210** Leave-one-out analysis, funnel plot, MR effect size and scatter plot for gut microbiota abundance (genus *Sellimonas* id.14369) on chronic pancreatitis

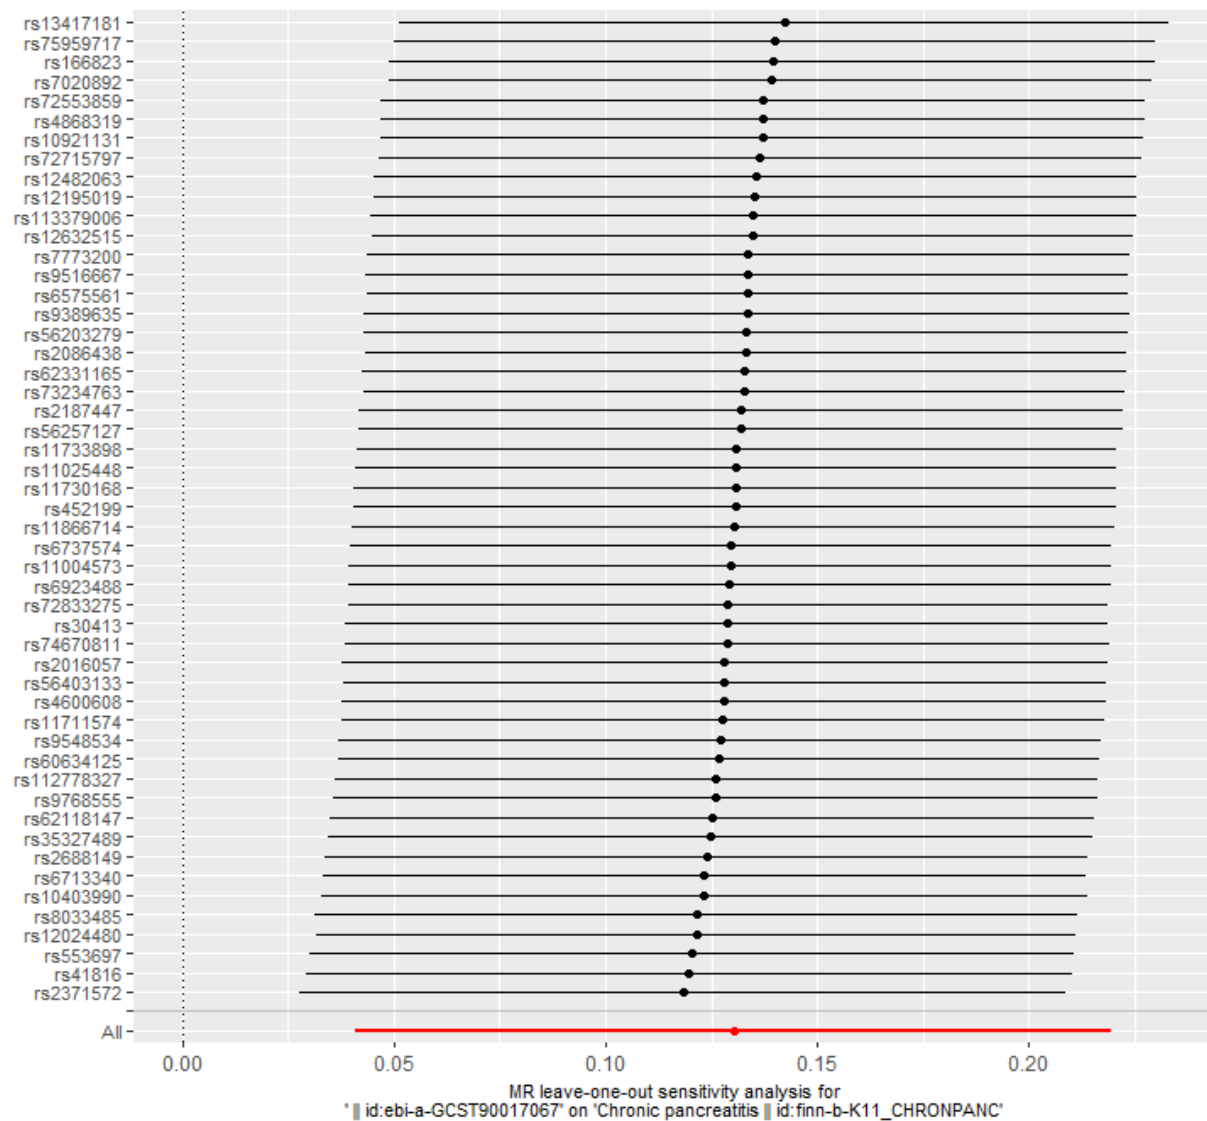

MR Method

- Inverse variance weighted
- MR Egger

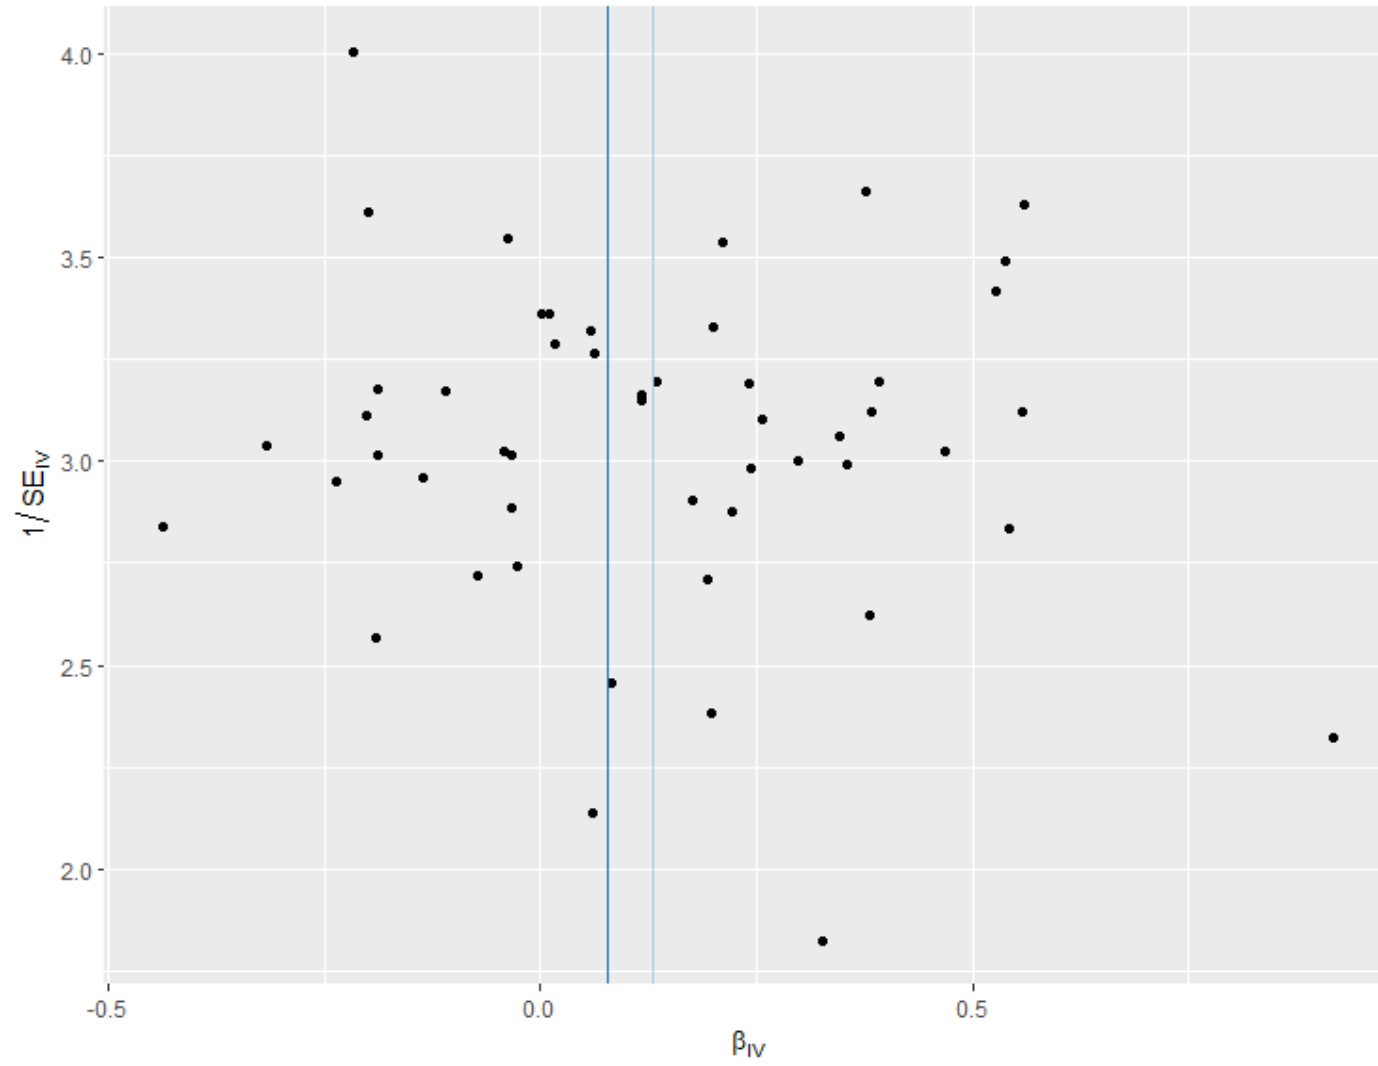

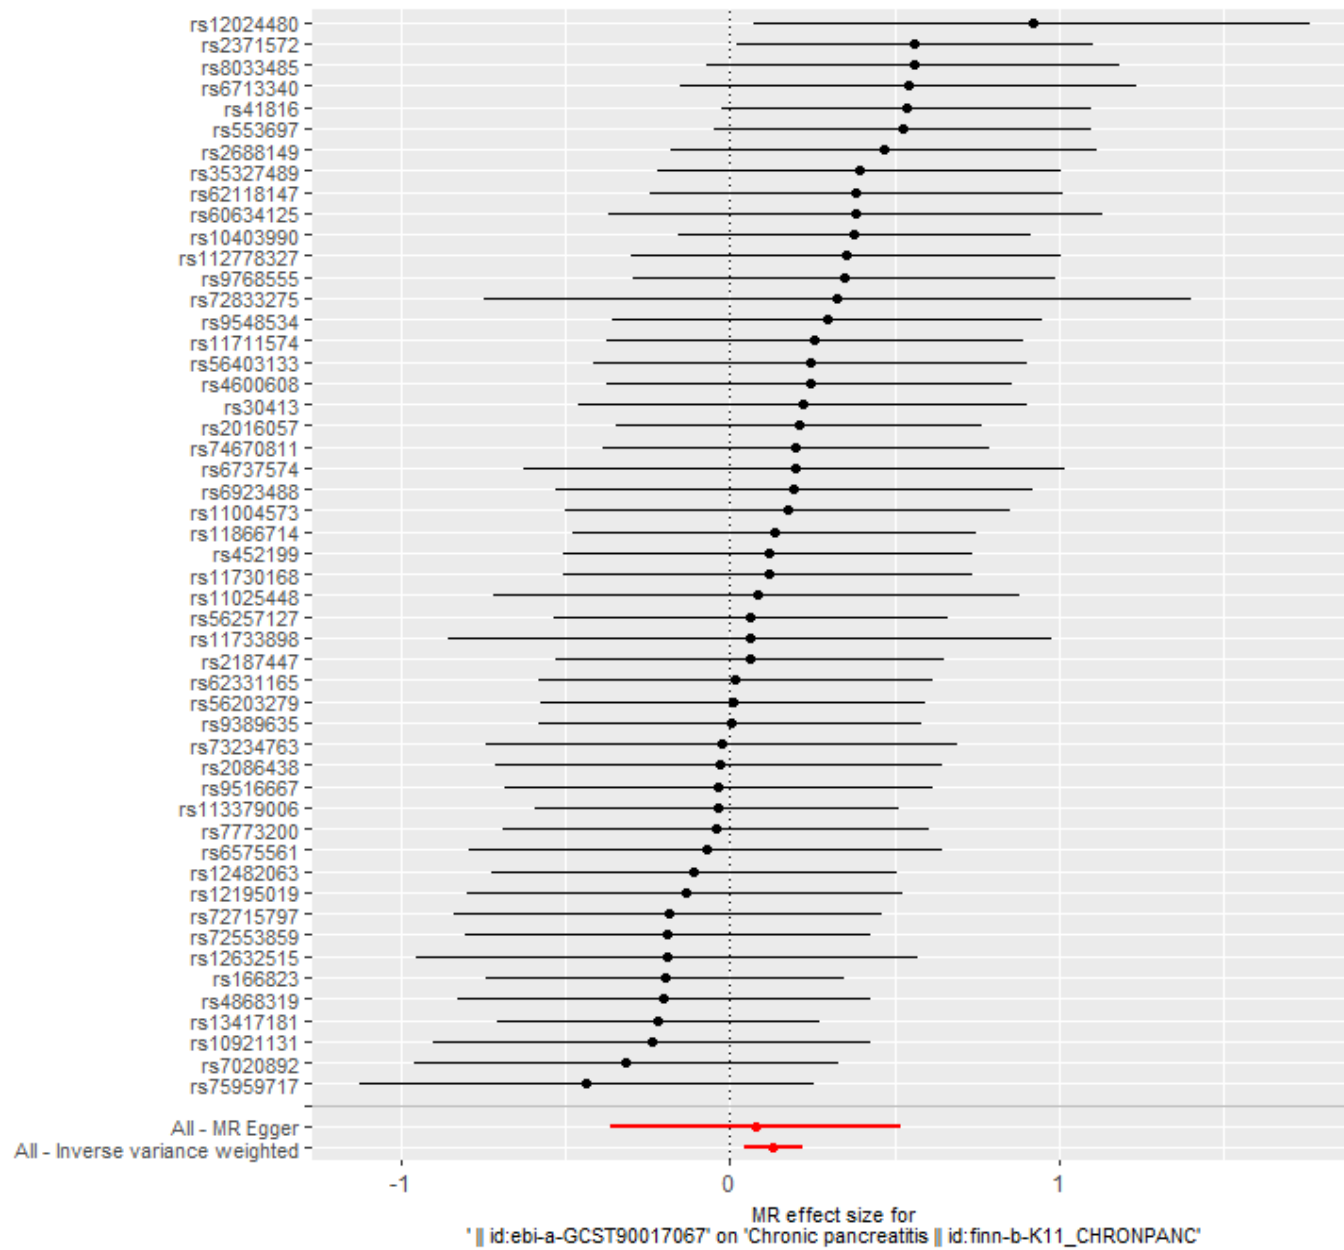

MR Test

- Inverse variance weighted
- MR Egger
- Simple mode
- Weighted median
- Weighted mode

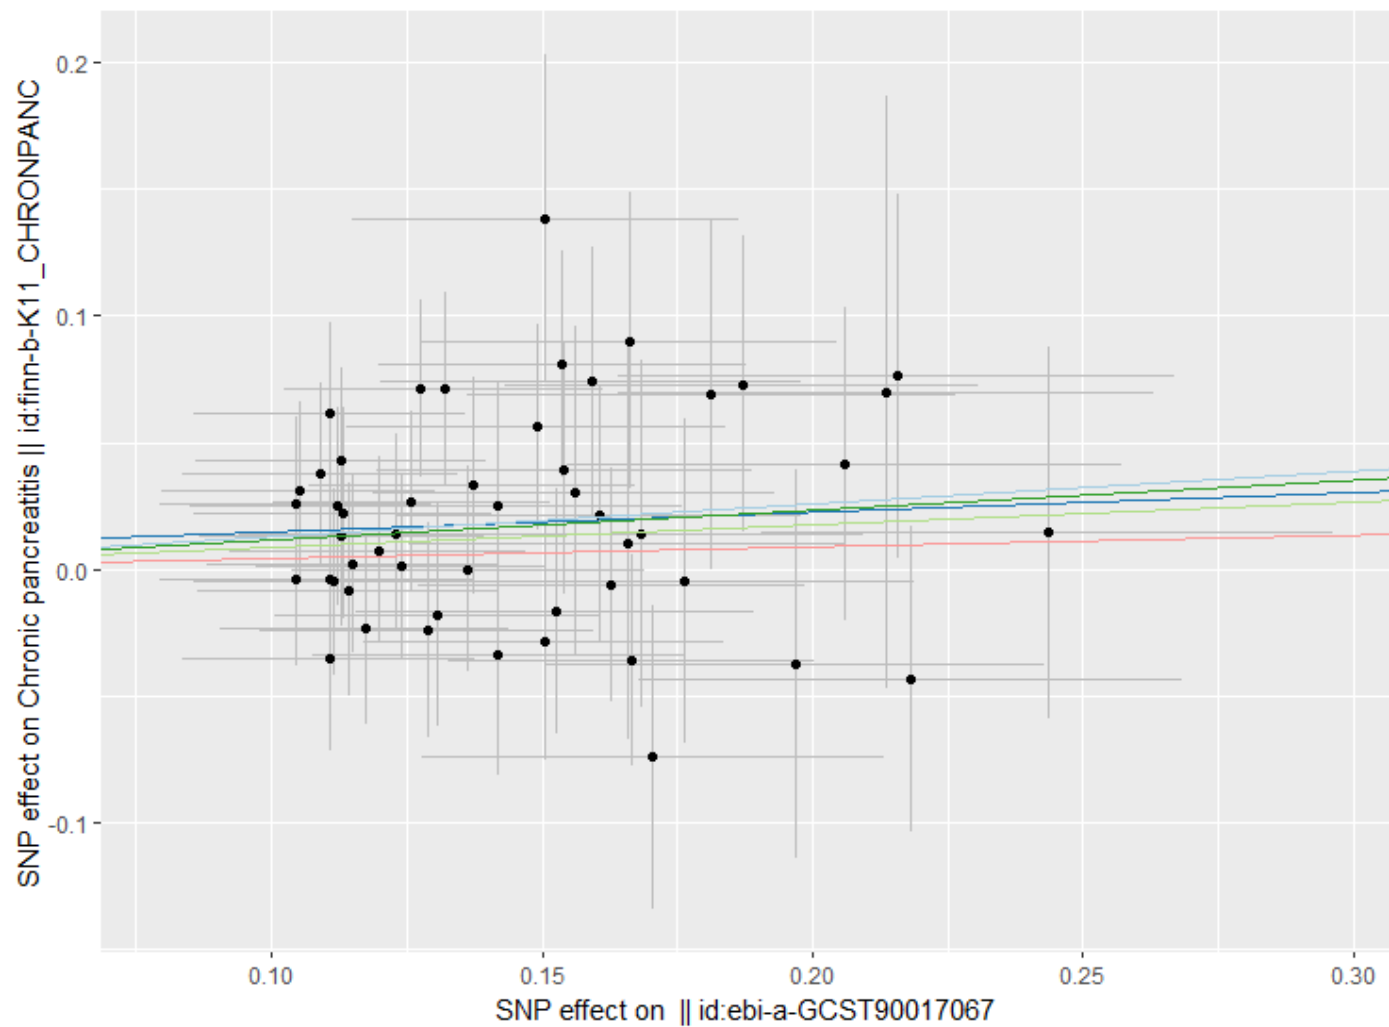



**Figure 211** Leave-one-out analysis, funnel plot, MR effect size and scatter plot for gut microbiota abundance (genus *Slackia* id.825) on chronic pancreatitis

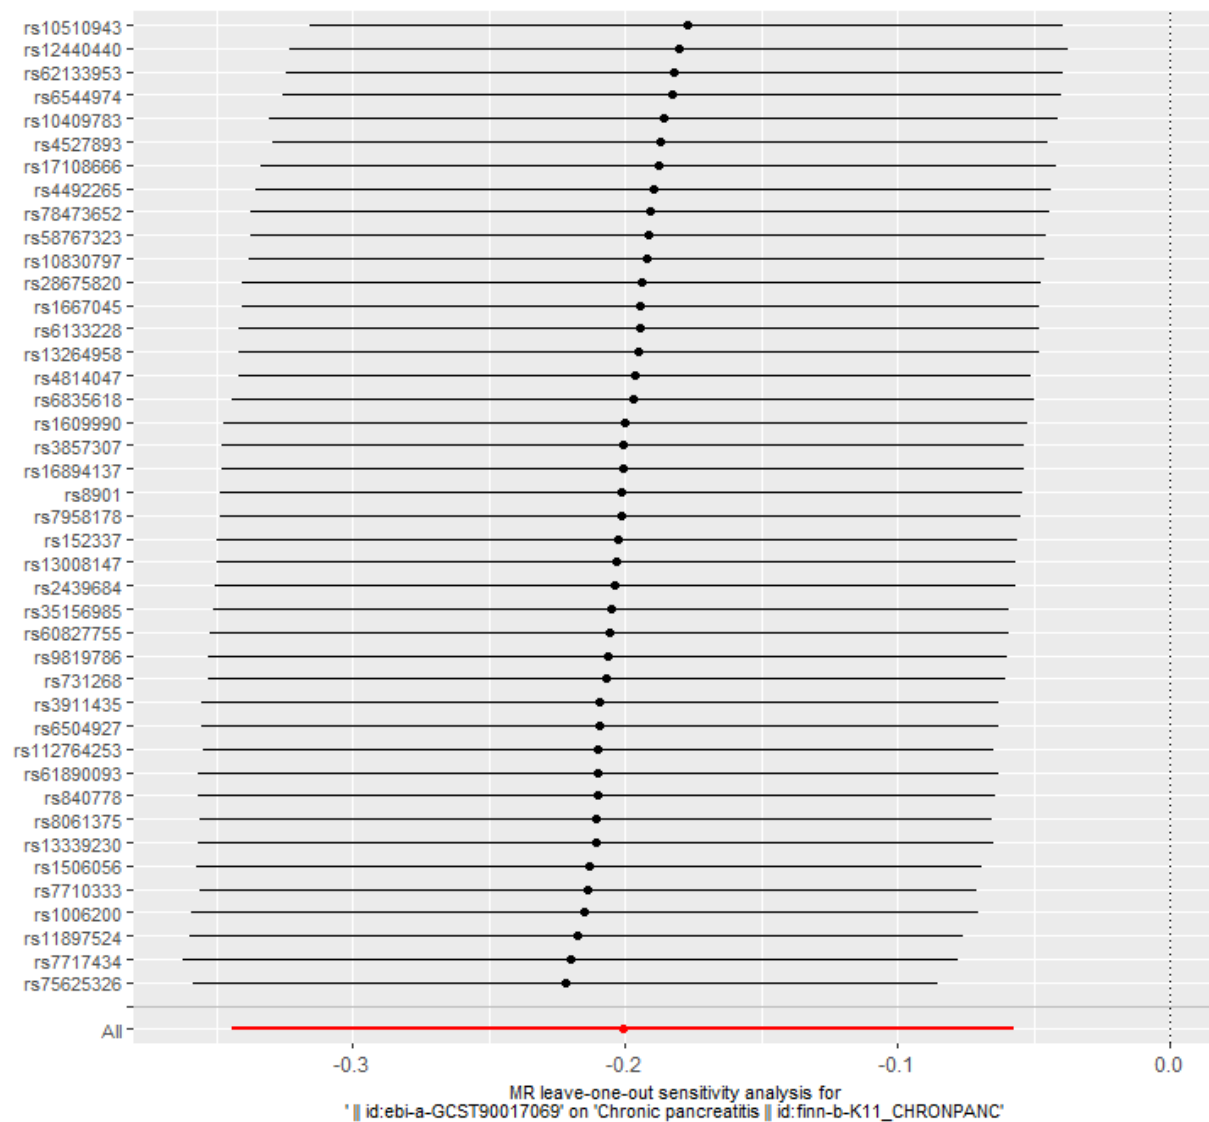

MR Method

- Inverse variance weighted
- MR Egger

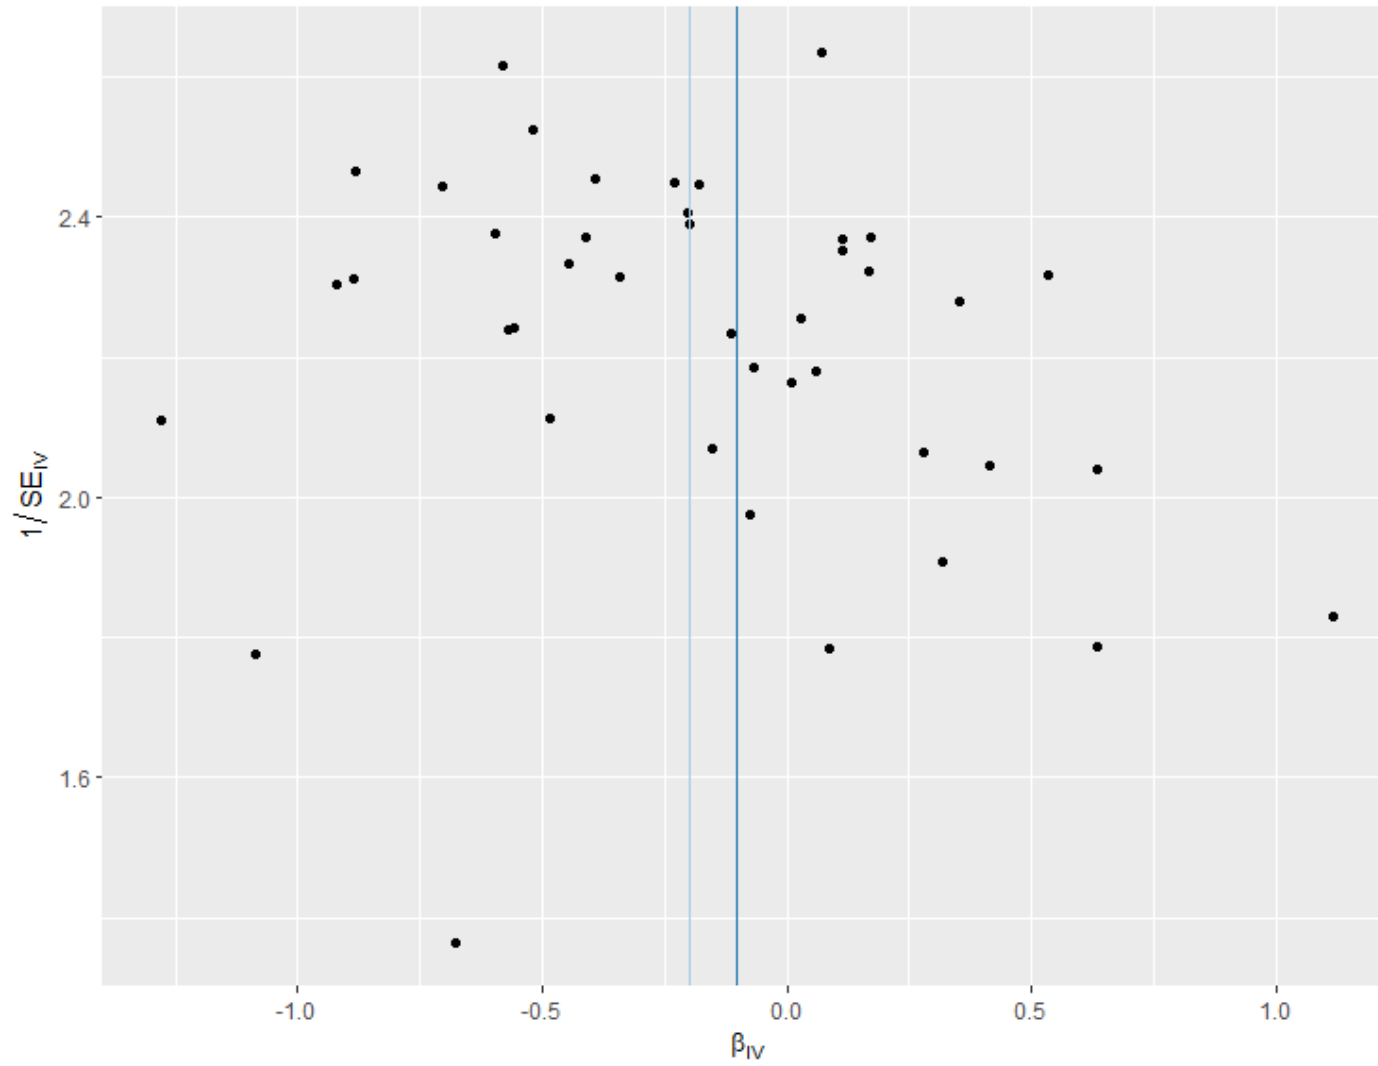

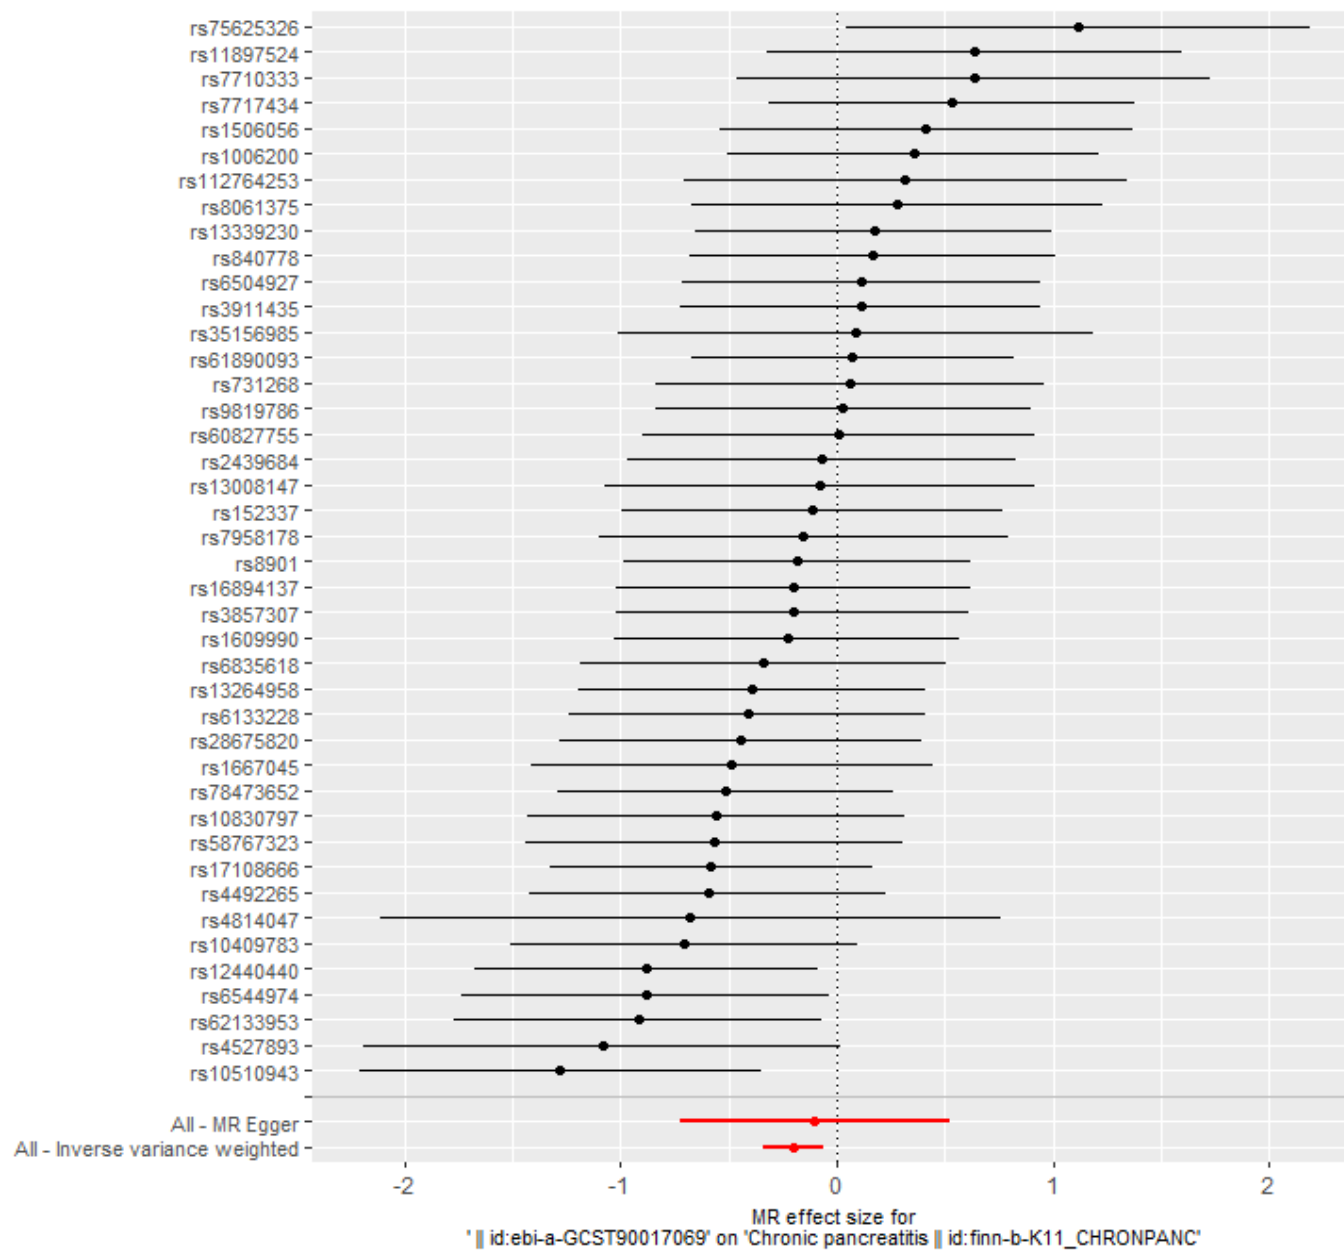

MR Test

- Inverse variance weighted
- MR Egger
- Simple mode
- Weighted median
- Weighted mode

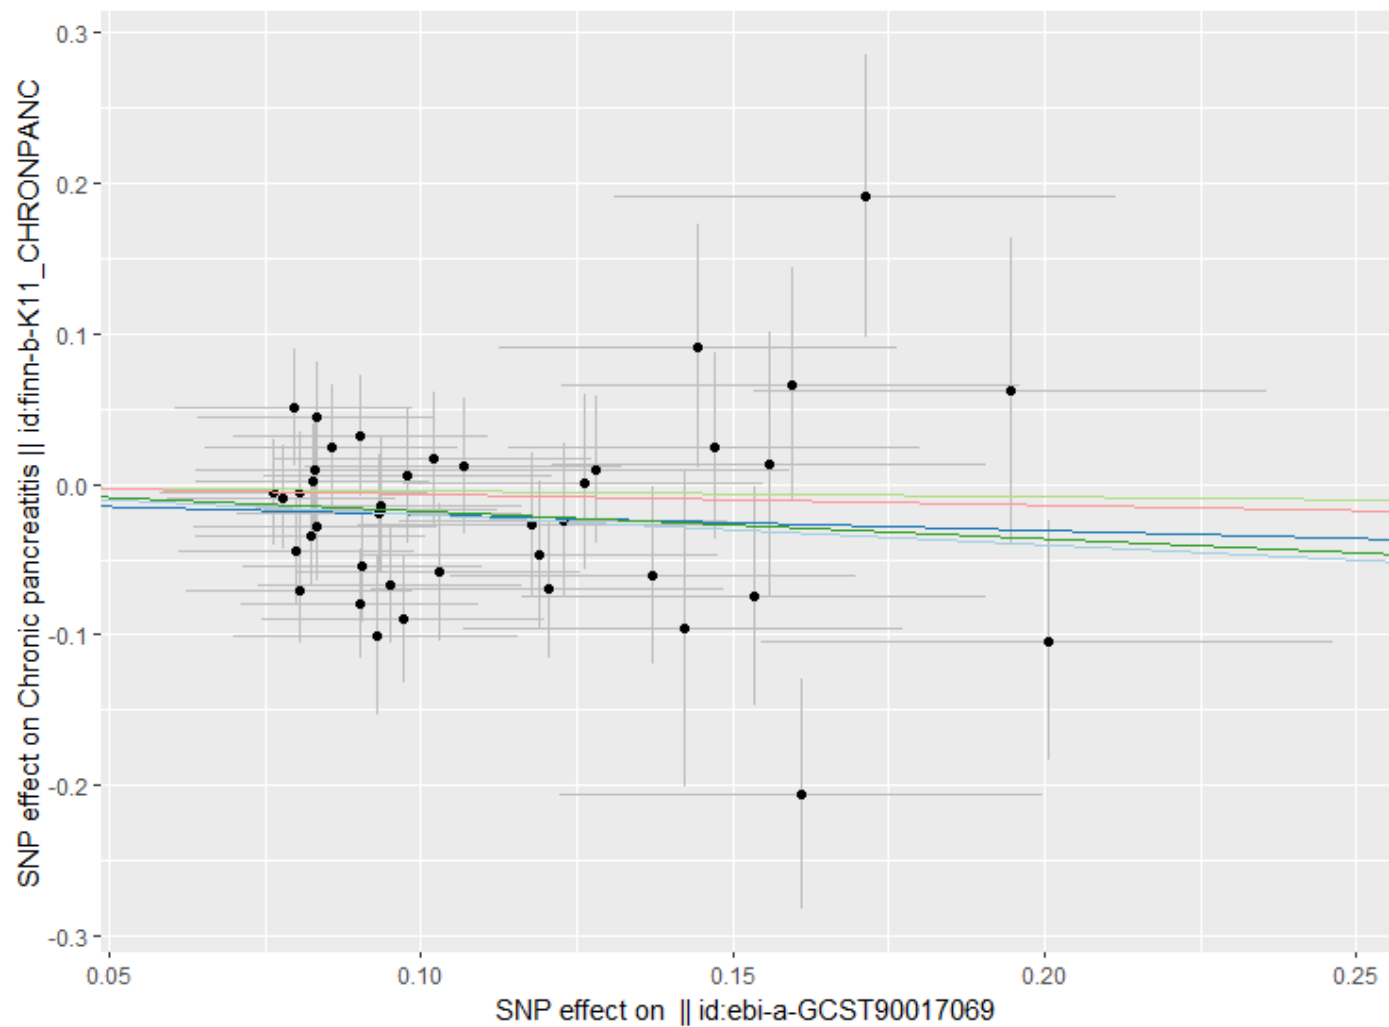

**Figure 212** Leave-one-out analysis, funnel plot, MR effect size and scatter plot for gut microbiota abundance (genus Prevotella9 id.11183) on pancreatic cancer

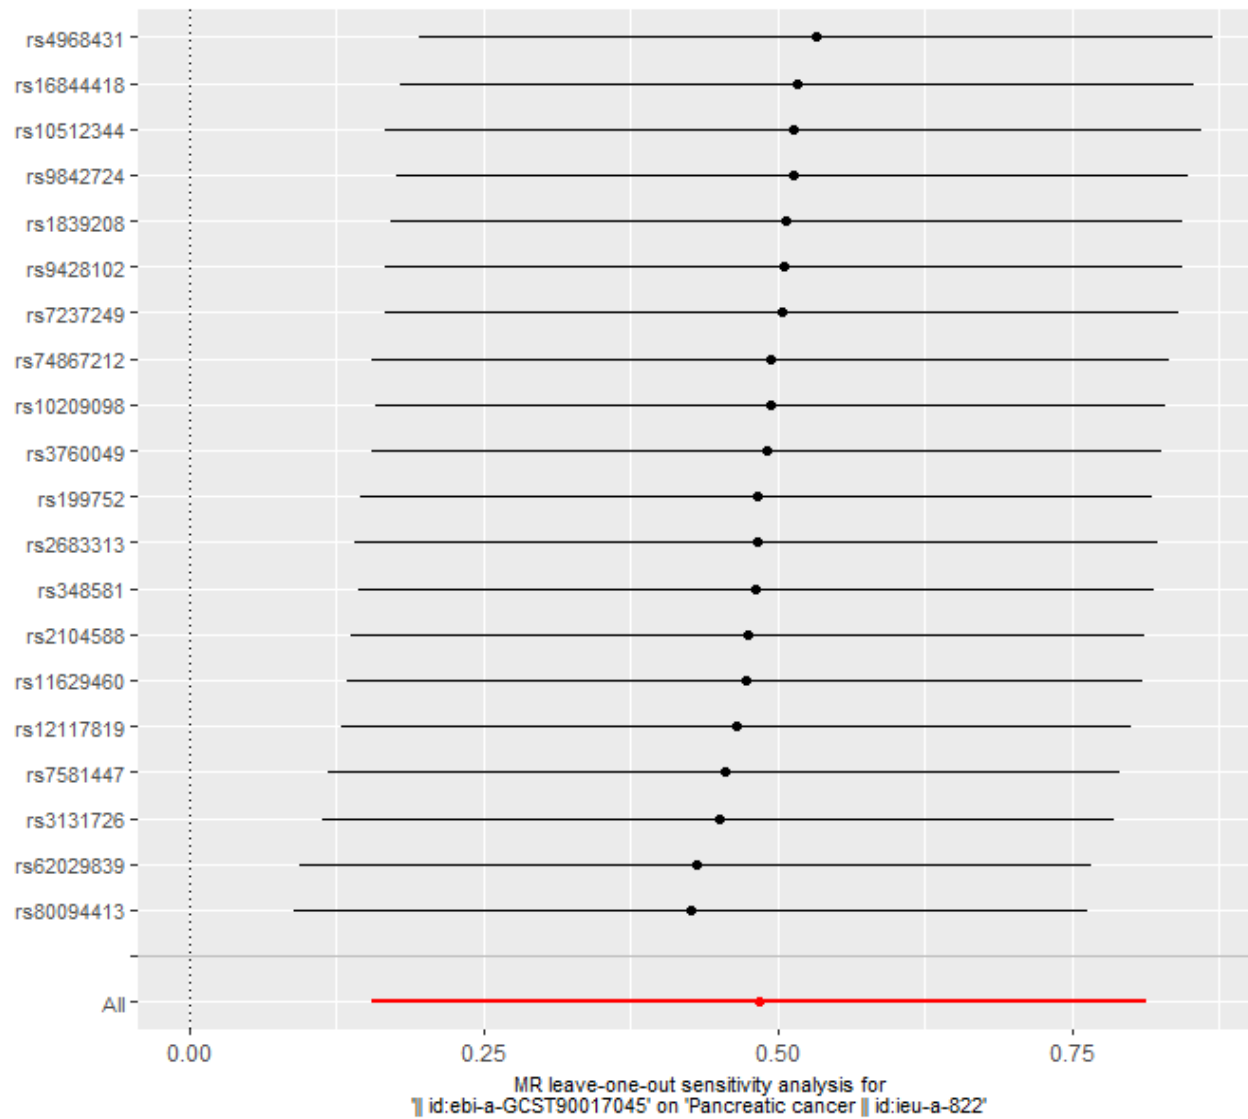

MR Method

- Inverse variance weighted
- MR Egger

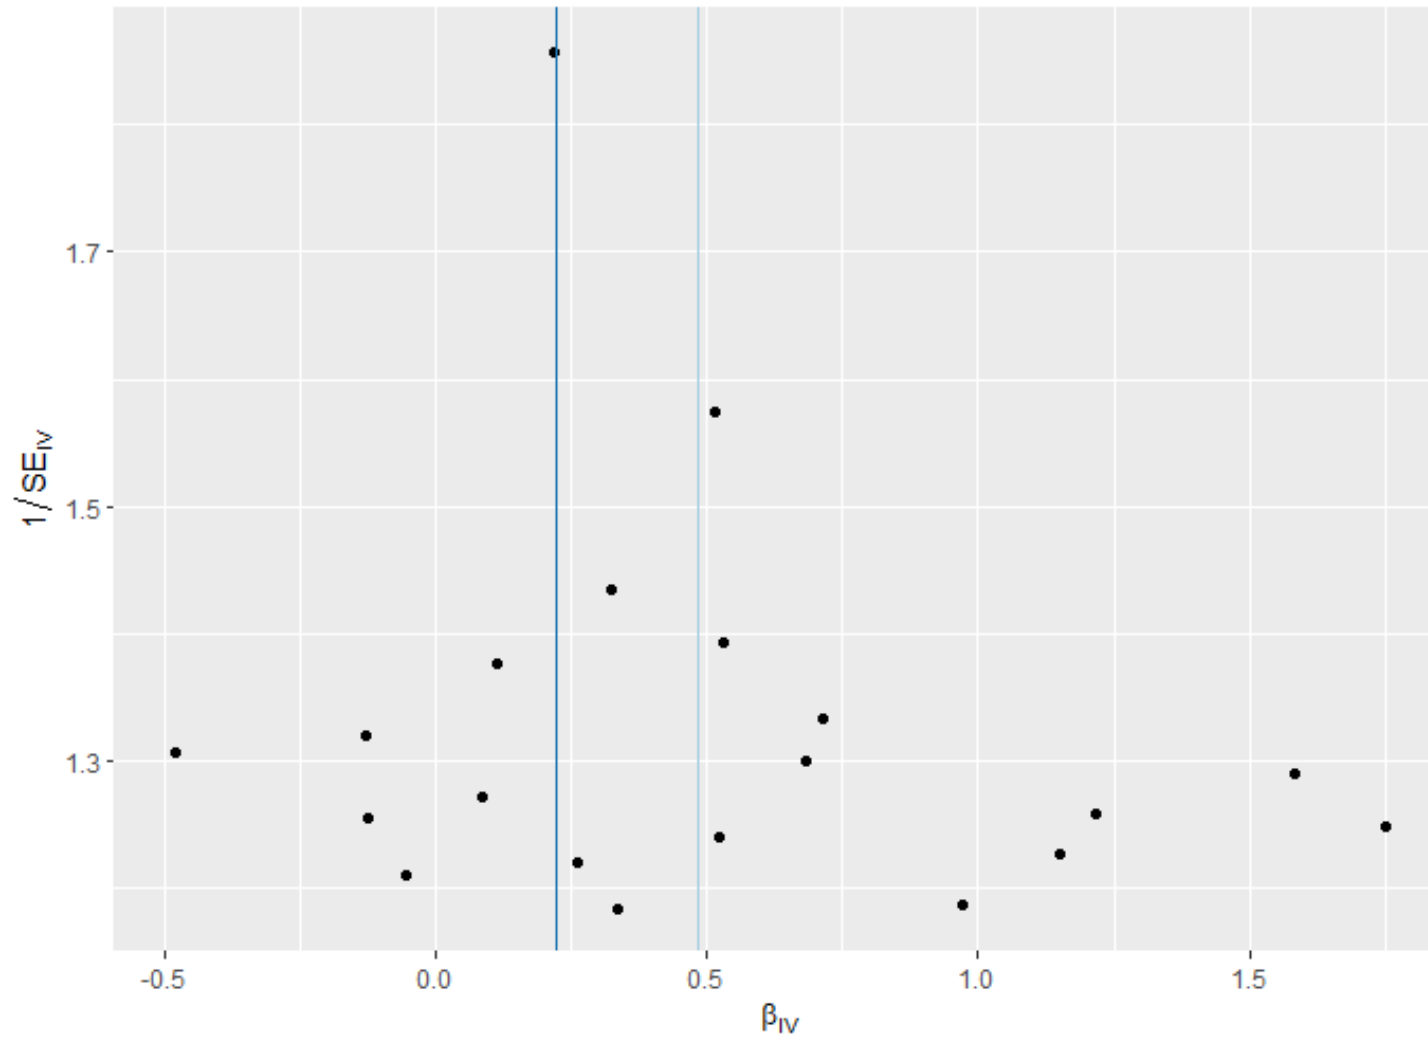

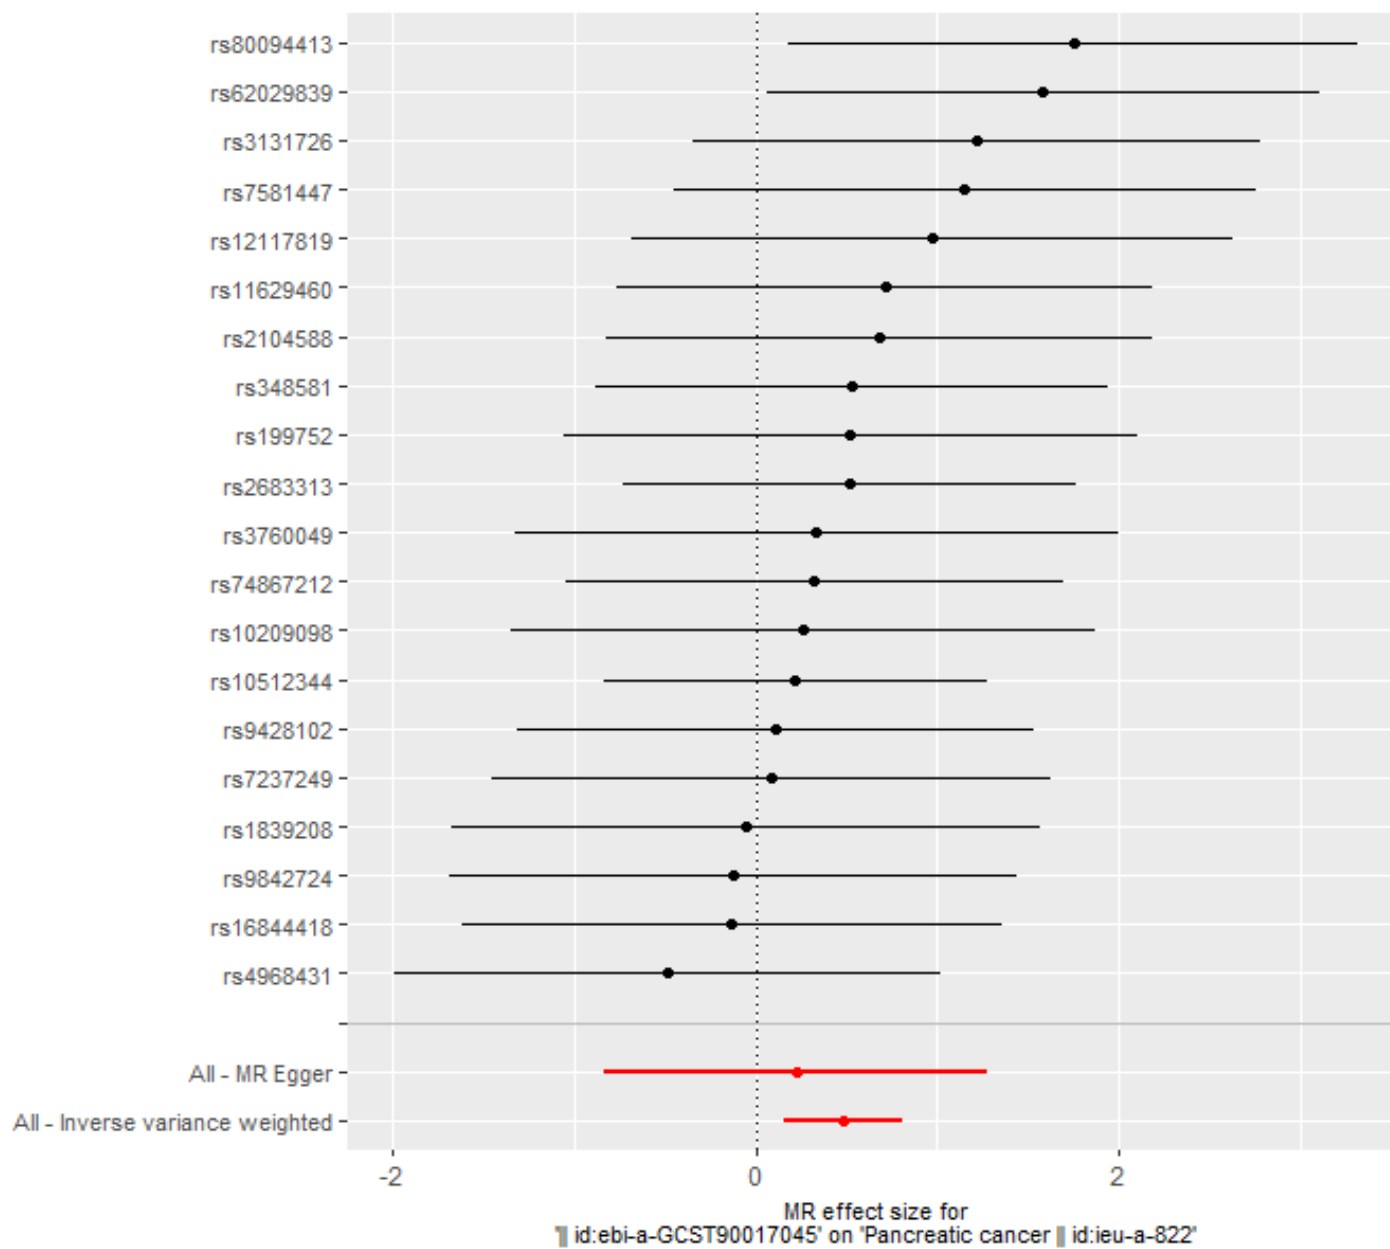

MR Test

- Inverse variance weighted
- MR Egger
- Simple mode
- Weighted median
- Weighted mode

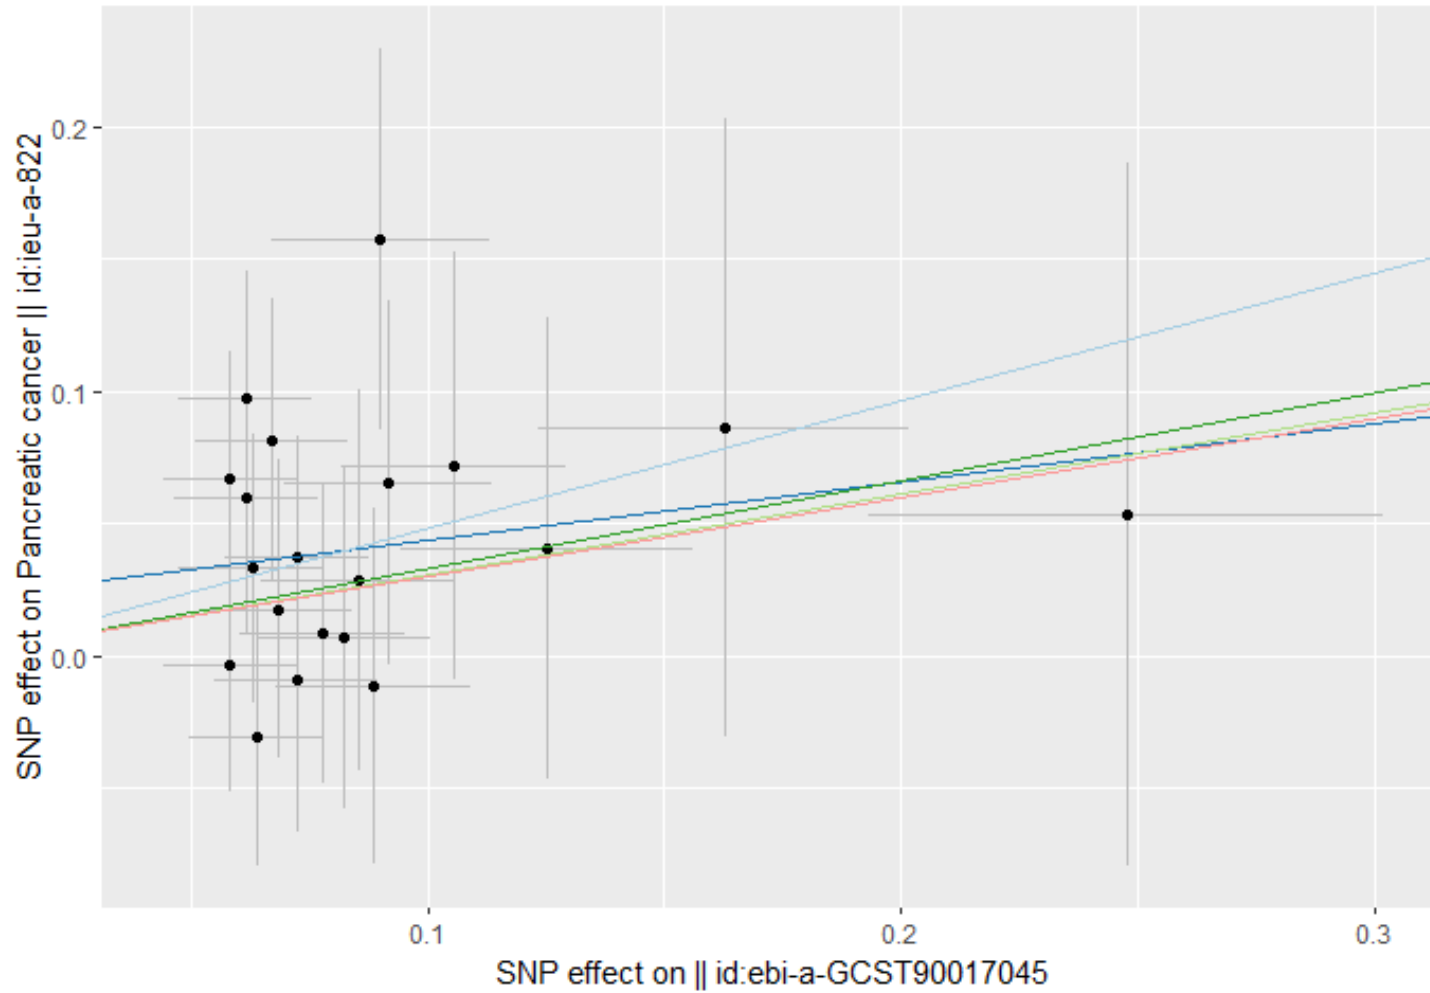

Supplement: 12967_2024_4894_MOESM8_ESM.pdf [file 12967_2024_4894_MOESM8_ESM.pdf]
